# Supplementary material for: Landscape of Bone Marrow Metastasis in Human Neuroblastoma Unraveled by Transcriptomics and Deep Multiplex Imaging
Source: Cancers (Basel). 2021 Aug 26;13(17):4311. doi: 10.3390/cancers13174311 (PMC8431445; doi:10.3390/cancers13174311)
Supplement: Supplementary file 1 [file cancers-13-04311-s001.zip]

Archive with 8 entries (8 files):
- cancers-1331004 - SUPPLMENTARY/cancers-1331004-supplementary-final_STM.pdf
- cancers-1331004 - SUPPLMENTARY/Table_S10.xlsx
- cancers-1331004 - SUPPLMENTARY/Table_S11.xlsx
- cancers-1331004 - SUPPLMENTARY/Table_S3.xlsx
- cancers-1331004 - SUPPLMENTARY/Table_S4.xlsx
- cancers-1331004 - SUPPLMENTARY/Table_S5.xlsx
- cancers-1331004 - SUPPLMENTARY/Table_S6.pdf
- cancers-1331004 - SUPPLMENTARY/Table_S7.xlsx
