# Supplementary material for: Landscape of Bone Marrow Metastasis in Human Neuroblastoma Unraveled by Transcriptomics and Deep Multiplex Imaging
Source: Cancers (Basel). 2021 Aug 26;13(17):4311. doi: 10.3390/cancers13174311 (PMC8431445; doi:10.3390/cancers13174311)
Supplement: Supplementary file 1 [file cancers-13-04311-s001.zip › cancers-1331004 - SUPPLMENTARY/Table_S3.xlsx]

## Sheet: Sheet2
OMICS-ID	FileMaker ID	Infiltration prior to DTC depletion [%]	Disease	Infiltration group	GEO series	GEO sample identifier
MNC_001_DX	1995-0029	10	Neuroblastoma	DTC-depleted BM	GSE94035	GSM5243542
MNC_002_DX	1998-1261	30	Neuroblastoma	DTC-depleted BM	GSE94035	GSM5243543
MNC_003_DX	2003-4304	60	Neuroblastoma	DTC-depleted BM	GSE94035	GSM5243544
MNC_004_DX	1999-1650	20	Neuroblastoma	DTC-depleted BM	GSE94035	GSM5243545
MNC_005_DX	1994-0919	60	Neuroblastoma	DTC-depleted BM	GSE94035	GSM5243538
MNC_006_DX	1993-0644	10	Neuroblastoma	DTC-depleted BM	GSE94035	GSM5243546
MNC_007_DX	1992-0551	10	Neuroblastoma	DTC-depleted BM	GSE94035	GSM5243547
MNC_008_DX	1993-0612	70	Neuroblastoma	DTC-depleted BM	GSE172184	GSM5243548
MNC_010_DX	1992-1283	1	Neuroblastoma	DTC-depleted BM	GSE94035	GSM5243549
MNC_027_DX	1995-0581	50	Neuroblastoma	DTC-depleted BM	GSE94035	GSM5243550
MNC_028_DX	2010-0681	1	Neuroblastoma	DTC-depleted BM	GSE94035	GSM5243551
MNC_030_DX	1998-1987	10	Neuroblastoma	DTC-depleted BM	GSE94035	GSM5243552
MNC_031_DX	1995-1415	15	Neuroblastoma	DTC-depleted BM	GSE94035	GSM5243553
MNC_033_DX	1992-1182	20	Neuroblastoma	DTC-depleted BM	GSE94035	GSM5243554
BM_059_NA	1999-1339	<1%	Neuroblastoma	DTC-depleted BM	GSE172184	GSM5243541
MNC_061_DX_2	1994-2119	1	Neuroblastoma	DTC-depleted BM	GSE172184	GSM5243539
BMn_121_DX	2014-3475	0	Neuroblastoma	BM without DTC infiltration	GSE172184	GSM5243517
BMn_137_DX	2013-0551	0	Neuroblastoma	BM without DTC infiltration	GSE172184	GSM5243518
BMn_139_DX	2010-0666	0	Ganglioneuroblastoma	BM without DTC infiltration	GSE172184	GSM5243519
BMn_247_DX	2015-3032	0	Ganglioneuroblastoma	BM without DTC infiltration	GSE172184	GSM5243520
BMn_366_DX_2	2012-2919	0	Neuroblastoma	BM without DTC infiltration	GSE172184	GSM5243521
BMn_397_DX	2012-3985	0	Neuroblastoma	BM without DTC infiltration	GSE172184	GSM5243522
BMn_507_DX	2011-2244	0	Ganglioneuroblastoma	BM without DTC infiltration	GSE172184	GSM5243523
MNC_517_DX_2	2014-2668	20	Neuroblastoma	DTC-depleted BM	GSE172184	GSM5243540
BMn_524_DX	2017-4510	0	Neuroblastoma	BM without DTC infiltration	GSE172184	GSM5243524
BMn_528_DX	2012-2862	0	Neuroblastoma	BM without DTC infiltration	GSE172184	GSM5243525
BMn_529_DX	2013-3767	0	Neuroblastoma	BM without DTC infiltration	GSE172184	GSM5243526
BMn_626_DX_2	2011-3238	0	Neuroblastoma	BM without DTC infiltration	GSE172184	GSM5243527
BMn_693_DX	2012-3410	0	Neuroblastoma	BM without DTC infiltration	GSE172184	GSM5243528
BMn_696_DX	2014-2570	0	Neuroblastoma	BM without DTC infiltration	GSE172184	GSM5243529
BMn_723_DX	2016-0215	0	Neuroblastoma	BM without DTC infiltration	GSE172184	GSM5243530
BMn_960_DX	2011-3744	0	Neuroblastoma	BM without DTC infiltration	GSE172184	GSM5243531
BMn_962_DX	2012-1331	0	Neuroblastoma	BM without DTC infiltration	GSE172184	GSM5243532
BMn_963_DX	2012-1623	0	Neuroblastoma	BM without DTC infiltration	GSE172184	GSM5243533
BMn_964_DX	2014-0173	0	Neuroblastoma	BM without DTC infiltration	GSE172184	GSM5243534
BMn_966_DX	2015-2736	0	Neuroblastoma	BM without DTC infiltration	GSE172184	GSM5243535
BMn_978_DX	2015-4334	0	Neuroblastoma	BM without DTC infiltration	GSE172184	GSM5243536
BMn_990_DX	2018-0095	0	Neuroblastoma	BM without DTC infiltration	GSE172184	GSM5243537
