# Supplementary material for: Landscape of Bone Marrow Metastasis in Human Neuroblastoma Unraveled by Transcriptomics and Deep Multiplex Imaging
Source: Cancers (Basel). 2021 Aug 26;13(17):4311. doi: 10.3390/cancers13174311 (PMC8431445; doi:10.3390/cancers13174311)
Supplement: Supplementary file 1 [file cancers-13-04311-s001.zip › cancers-1331004 - SUPPLMENTARY/Table_S4.xlsx]

## Sheet: BulkRNA-Seq (2)
Identifier	MYCN amp.	ALK amp.	ALK mut.	ATRX del.	TERT rear.	1p loss	1q gain	11q loss	17q gain	Dataset	Comment
NB1	0	0	0	0	1	1	1	1	1	Paper
NB2	0	9	9	9	9	1	9	9	1	Paper
NB3	1	0	0	0	0	1	1	1	0	Paper
NB4	0	0	0	0	0	0	0	0	0	Paper
GSM2467395	3	0	9	0	0	0	0	0	1	RNA-Seq
GSM2467397	0	0	9	0	0	1	1	0	1	RNA-Seq
GSM2467392	0	9	9	0	9	0	0	1	1	RNA-Seq
GSM2467360	0	0	9	0	0	0	0	1	1	RNA-Seq
GSM2467391	1	9	9	9	9	0	9	9	9	RNA-Seq
GSM2467401	0	0	9	1	0	1	0	1	1	RNA-Seq
GSM2467398	1	9	9	9	9	1	9	9	9	RNA-Seq
GSM2467370	0	0	9	1	0	0	0	1	1	RNA-Seq
GSM2467394	1	0	9	0	0	1	0	0	1	RNA-Seq
GSM2467361	1	0	9	0	0	1	0	0	1	RNA-Seq
GSM2467372	0	0	9	9	9	1	0	1	1	RNA-Seq
GSM2467364	1	0	9	0	1	0	1	0	1	RNA-Seq
GSM2467390	1	0	9	0	0	1	0	0	1	RNA-Seq
GSM2467365	0	0	9	1	0	0	0	1	1	RNA-Seq
GSM2467436	1	0	9	0	0	1	0	0	1	RNA-Seq
GSM2467367	1	0	9	0	0	1	1	1	1	RNA-Seq
GSM2467363	1	1	9	0	0	1	0	0	1	RNA-Seq
GSM2467388	0	0	9	0	0	1	1	1	1	RNA-Seq
GSM2467434	1	9	9	9	9	9	9	9	9	RNA-Seq
GSM2467445	0	0	9	1	0	0	0	1	0	RNA-Seq
GSM2467362	1	0	9	0	0	1	0	0	1	RNA-Seq
GSM2467440	1	9	9	9	9	1	9	9	1	RNA-Seq
GSM2467442	0	9	9	9	9	9	9	1	1	RNA-Seq
GSM2467400	0	0	9	0	0	0	0	1	1	RNA-Seq
GSM2467435	1	0	0	0	0	1	0	0	1	RNA-Seq
GSM2467444	0	0	0	0	1	0	0	1	1	RNA-Seq
GSM2467433	1	0	0	0	0	1	0	0	1	RNA-Seq
GSM2467396	0	0	9	0	0	1	0	1	1	RNA-Seq
GSM2467437	0	0	0	0	0	0	0	1	1	RNA-Seq
GSM2467443	1	0	0	0	0	1	0	0	1	RNA-Seq
GSM2467389	0	0	9	0	0	0	0	1	1	RNA-Seq
GSM2467441	3	0	1	0	0	1	0	1	1	RNA-Seq
GSM2467399	1	0	9	0	0	1	0	0	0	RNA-Seq
GSM2467439	1	0	9	0	0	1	0	0	1	RNA-Seq
GSM2467438	1	0	9	0	1	1	1	0	0	RNA-Seq
GSM2467374	1	9	9	9	9	1	9	9	9	RNA-Seq_Rel
GSM2467375	0	0	9	1	0	1	0	1	1	RNA-Seq_Rel
GSM2467376	0	0	9	0	0	0	1	1	1	RNA-Seq_Rel
GSM2467377	0	9	9	9	9	9	9	9	1	RNA-Seq_Rel
GSM2467378	0	0	9	0	0	0	1	1	1	RNA-Seq_Rel
GSM2467379	1	1	9	0	0	0	0	0	1	RNA-Seq_Rel
GSM2467380	1	0	9	1	0	1	0	0	0	RNA-Seq_Rel
GSM2467381	0	0	9	0	1	0	1	0	1	RNA-Seq_Rel
GSM2467382	0	0	9	1	0	1	0	1	1	RNA-Seq_Rel
GSM2467383	0	0	9	0	1	1	1	1	1	RNA-Seq_Rel
GSM2467384	0	0	9	1	0	0	0	1	1	RNA-Seq_Rel
GSM2467385	1	0	9	0	0	1	0	0	1	RNA-Seq_Rel
GSM2467386	0	0	9	1	0	1	0	1	1	RNA-Seq_Rel
GSM2467387	0	0	9	0	1	1	0	1	1	RNA-Seq_Rel
GSM2467414	1	0	9	0	0	1	0	0	1	RNA-Seq_Rel	Genetics from the corresponding Tumor/DTC sample
GSM2467427	0	0	9	0	1	1	0	1	1	RNA-Seq_Rel	Genetics from the corresponding Tumor/DTC sample
GSM2467428	1	1	9	0	0	1	1	0	1	RNA-Seq_Rel	Genetics from the corresponding Tumor/DTC sample
GSM2467429	0	0	9	0	0	1	0	0	1	RNA-Seq_Rel	Genetics from the corresponding Tumor/DTC sample
