# Supplementary material for: Landscape of Bone Marrow Metastasis in Human Neuroblastoma Unraveled by Transcriptomics and Deep Multiplex Imaging
Source: Cancers (Basel). 2021 Aug 26;13(17):4311. doi: 10.3390/cancers13174311 (PMC8431445; doi:10.3390/cancers13174311)
Supplement: Supplementary file 1 [file cancers-13-04311-s001.zip › cancers-1331004 - SUPPLMENTARY/Table_S5.xlsx]

## Sheet: statistics
Ensembl	Gene	Band	expr_DTC	expr_MNC	expr_DTCtum	expr_DTCmna	expr_DTCnomna	expr_DTCMYCNhigh	expr_DTCMYCNlow	expr_DTCdx	expr_DTCrel	expr_DTCmatchdx	expr_DTCmatchrel	expr_DTCdxmna	expr_DTCrelmna	expr_DTCdxnomna	expr_DTCrelnomna	expr_TUM	expr_TUDTCMYCNhigh	expr_TUDTCMYCNlow	expr_DTCvh	expr_DTCl	expr_TUMmna	expr_TUMnomna	expr_TUMdx	expr_TUMdxmna	expr_TUMdxnomna	expr_TUMandMNC	fcDTC_vs_MNC	pDTC_vs_MNC	qDTC_vs_MNC	fcDTCtum_vs_MNC	pDTCtum_vs_MNC	qDTCtum_vs_MNC	fcDTC_mna_vs_DTC_nomna	pDTC_mna_vs_DTC_nomna	qDTC_mna_vs_DTC_nomna	fcDTC_MYCNhigh_vs_DTC_MYCNlow	pDTC_MYCNhigh_vs_DTC_MYCNlow	qDTC_MYCNhigh_vs_DTC_MYCNlow	fcDTCdx_vs_DTCrel	pDTCdx_vs_DTCrel	qDTCdx_vs_DTCrel	fcDTCdx_vs_DTCrel_MYCNcontrolled	pDTCdx_vs_DTCrel_MYCNcontrolled	qDTCdx_vs_DTCrel_MYCNcontrolled	fcDTCmatchdx_vs_DTCmatchrel	pDTCmatchdx_vs_DTCmatchrel	qDTCmatchdx_vs_DTCmatchrel
ENSG00000145362	ANK2	4q25	5495.36	36.0371	6634.16	10514.5	3375.06	7783.07	4143.43	5622.53	5620.11	4694.82	4631.89	10458.4	10884.4	3807.19	3351.92	4517.47	6358.21	4266.16	8130.68	2995.04	4128.27	4993.97	4436.07	4222.29	5036.32	1637.15	7.18683	1.45552e-134	3.53146e-132	7.37492	1.32154e-29	1.92712e-27	1.53675	2.19065e-05	0.000887356	0.852183	0.00897762	0.0638966	-0.140701	0.687573	0.87902	-0.0137445	0.9658	0.989881	-0.314515	0.472178	0.999992
ENSG00000018236	CNTN1	12q12	3679.81	12.7761	1146.17	2317.12	4955.75	1470.33	5099	3431.21	4149.76	6877.79	3724.81	2481.5	2228.26	5588.79	5018.44	3357.04	1570.39	5199.24	4365.41	3381.45	1736.85	5927.92	3288.82	1777.46	5998.43	1204.81	8.07848	2.44717e-126	4.9204e-124	6.39645	5.97103e-17	2.60064e-15	-1.138	0.0091842	0.0641372	-1.7402	3.95803e-08	5.49506e-06	-0.172507	0.678433	0.873816	-0.328761	0.283141	0.612487	0.283605	0.518992	0.999992
ENSG00000166402	TUB	11p15.4	3239.8	36.4644	1943.25	2637.64	3810.26	2304.33	3858.91	3055.44	3513.43	4113.26	2310.27	2400.28	2944.22	4137.07	3818.83	4144.09	2325.38	4396.66	3937.6	2333.4	2370.03	6961.95	4065.17	2423.2	7028.82	1502.33	6.44059	1.13996e-180	7.73572e-178	5.69022	4.06971e-29	5.69461e-27	-0.468026	0.0811216	0.25212	-0.706061	0.00319566	0.0316251	-0.0450454	0.869549	0.954664	-0.110941	0.646704	0.85484	0.218261	0.589657	0.999992
ENSG00000154380	ENAH	1q42.12	3065.43	43.8235	6.09881	2.58043e-209	4.31032e-206	-0.598629	0.00672008	0.106579	Cytoskeleton	Cytoplasm+Membrane																	6.09881	2.58043e-209	4.31032e-206	-0.598629	0.00672008	0.106579	Cytoskeleton	Cytoplasm+Membrane					-0.598629	0.00672008	0.106579	Cytoskeleton	Cytoplasm+Membrane
ENSG00000080644	CHRNA3	15q25.1	3048.3	16.0339	2594.62	2462.64	3601.51	1890.18	3806.98	2721.79	3547.7	3620.19	2127.75	2380.36	2614.93	3497.86	3998.58	2641.82	1650.09	3957.41	4350.1	2240.95	1284.08	4826.24	2592.56	1314.37	4869.03	953.629	7.49922	3.82064e-137	9.64711e-135	7.20345	5.2811e-25	5.08858e-23	-0.626715	0.116323	0.314316	-1.02007	0.000982873	0.0138228	-0.256703	0.482186	0.763911	-0.31738	0.296642	0.624523	0.246054	0.551132	0.999992
ENSG00000185686	PRAME	22q11.22	2715.18	9.80377	192.446	3764.81	2811.96	3089.69	2511.36	2217.43	3048.2	3026.02	2686.3	3433.84	4191.29	2708.75	2643.71	4679.68	3732.02	2829.11	2994.06	736.773	4747.99	4316.49	4592.83	4862.14	4370.46	1677.29	7.98751	3.28104e-92	3.83053e-90	4.34934	3.87084e-07	3.50605e-06	0.333246	0.512728	0.723405	0.306391	0.485777	0.706243	-0.464592	0.323218	0.64814	-0.425953	0.313959	0.636468	-0.111629	0.786843	0.999992
ENSG00000177679	SRRM3	7q11.23	2616.93	14.7714	2360.11	2518.27	2895.91	2037.2	3009.33	2500.04	2752.09	2714.97	1859.27	3419.48	1718.76	2547.13	3222.6	2866.59	2114.49	3125.49	3937.83	1417.1	2255.61	3763.29	2815.65	2307.27	3805.9	1033.97	7.41193	3.15767e-167	1.44356e-164	7.21487	1.68e-31	2.78004e-29	-0.195177	0.581267	0.772976	-0.44565	0.0463184	0.183932	-0.110376	0.723232	0.895563	-0.0359599	0.870869	0.953588	0.119304	0.78162	0.999992
ENSG00000092051	JPH4	14q11.2	2590.78	27.4129	2976.71	2824.78	2710.12	2456.48	2700.64	2569.54	2656.93	3067.45	2060.81	3522.22	2229.91	2600.08	2895.31	3302.25	2663.35	2858.56	3619.68	1418.94	3009.61	3647.17	3242	3079.07	3684.04	1197.17	6.53285	1.38203e-209	2.50089e-206	6.70502	9.05727e-50	5.06941e-47	0.100211	0.702019	0.849572	-0.0463082	0.834956	0.922579	-0.093417	0.695505	0.88217	-0.0817019	0.710901	0.886155	-0.0584984	0.893064	0.999992
ENSG00000087258	GNAO1	16q12.2	2255.22	42.6158	2908.42	2487.96	2304.5	2300.2	2252.14	2195.21	2341.14	2467.11	1620.38	2672.44	2381.04	2331.42	2363.54	3228.79	2462.25	2544.86	3023.6	1163.63	2730.61	3926.02	3169.08	2794.31	3964.82	1180.18	5.70646	7.96143e-169	3.75832e-166	6.04574	8.75501e-41	2.52436e-38	0.0637427	0.805321	0.907855	0.00563348	0.977078	0.990061	-0.102254	0.659748	0.865237	-0.094474	0.631324	0.845744	0.049389	0.907978	0.999992
ENSG00000169258	GPRIN1	5q35.2	2232.3	36.7647	3774.66	2243.56	2426.36	2213.48	2281.86	2171.95	2329.16	2263.81	2020.53	2337.61	2216.21	2540.91	2441.38	1909.38	2063.68	2190.66	2821.37	944.953	1846.33	1927.73	1873.89	1888.21	1948.99	705.224	5.8942	9.07588e-181	6.35751e-178	6.61341	2.12871e-50	1.28601e-47	0.00218531	0.993084	0.997362	0.0618863	0.753761	0.880383	-0.07095	0.749217	0.907892	-0.0859263	0.660619	0.861547	-0.00585663	0.98816	0.999992
ENSG00000164742	ADCY1	7p12.3	2095.92	19.6869	6.67993	1.75834e-140	4.86401e-138	-0.000108032	0.999717	0.999808	Membrane	Other																	6.67993	1.75834e-140	4.86401e-138	-0.000108032	0.999717	0.999808	Membrane	Other					-0.000108032	0.999717	0.999808	Membrane	Other
ENSG00000117152	RGS4	1q23.3	2077.11	13.982	7.10464	3.33161e-80	3.27357e-78	-1.44702	0.000756334	0.0364068	Membrane	Cytoskeleton																	7.10464	3.33161e-80	3.27357e-78	-1.44702	0.000756334	0.0364068	Membrane	Cytoskeleton					-1.44702	0.000756334	0.0364068	Membrane	Cytoskeleton
ENSG00000182985	CADM1	11q23.3	2071.17	62.123	3196.12	1800.99	2434.68	1618.75	2380.28	1870.29	2357.62	1504.12	1210.57	1414.5	2228.73	2673.26	2459.19	2587.29	1743.01	2571.53	2829.26	900.495	1942.89	3557.03	2537	1988.34	3596.11	962.671	5.03814	1.56987e-117	2.70553e-115	5.6238	8.62137e-29	1.18458e-26	-0.367833	0.166762	0.388468	-0.498801	0.0462291	0.183775	-0.380474	0.11024	0.403145	-0.394777	0.103031	0.394463	-0.00243077	0.995197	0.999992
ENSG00000170558	CDH2	18q12.1	2030.26	18.2303	3150.83	2213.62	2088.46	2110.87	2007	1801.55	2316.46	1395.53	1463.53	2359.09	2134.36	1734.75	2423.08	2512.24	2220.89	2094.33	2296.26	1060.38	2406.26	2567.69	2466.81	2463.14	2596.31	909.115	6.74215	1.05479e-169	5.03403e-167	7.3225	1.28381e-44	4.98592e-42	0.165087	0.595883	0.782636	0.155143	0.523509	0.734362	-0.443598	0.099018	0.383699	-0.466328	0.0455836	0.274735	-0.322125	0.443457	0.999992
ENSG00000060709	RIMBP2	12q24.33	1895.51	113.119	2367.93	1705.99	2014.04	1773.18	2008.76	1671.21	2176.74	1777.19	2273.4	1541.8	1913.6	1803.4	2250.56	4052.13	2363.75	2557.39	2119.19	1702.4	3310.86	5115.65	3976.99	3384.72	5175.1	1519.32	4.13501	6.51319e-26	1.81442e-24	4.36707	1.61237e-06	1.28922e-05	-0.290869	0.609444	0.791382	-0.2115	0.356993	0.603997	-0.381034	0.432227	0.727943	-0.342342	0.127553	0.435052	-0.540117	0.127148	0.999992
ENSG00000143850	PLEKHA6	1q32.1	1809.2	28.9665	2896.27	1768.4	1981.64	1720.84	1886.34	1715.29	1907.79	1795.09	1787.2	1583.09	1999.68	2190.83	1882.55	3085.69	1893.23	2350.03	2432.43	998.879	2178.98	4476.74	3025.46	2229.98	4524.36	1119.31	5.93476	1.00442e-204	1.45407e-201	6.58556	4.4268e-58	4.2121e-55	-0.156425	0.499216	0.714088	-0.128417	0.539418	0.746249	-0.17289	0.423915	0.721984	-0.167155	0.432004	0.726038	-0.26297	0.498762	0.999992
ENSG00000092096	SLC22A17	14q11.2	1711.78	42.5177	2643.16	1268.77	2046.83	1310.87	1979.45	1747.63	1725.55	2391.3	1167.01	1307.4	1268.78	2357.62	1975.08	3482.94	1557.62	2694.42	2547.36	1001.89	1962.18	5929.5	3423.57	2005.03	5967.5	1273.07	5.29943	5.35231e-93	6.33381e-91	5.87142	2.47341e-22	1.90178e-20	-0.54394	0.103989	0.293738	-0.512732	0.0724099	0.242632	-0.0258796	0.930534	0.976853	0.00889699	0.975399	0.993297	0.350128	0.352117	0.999992
ENSG00000121753	BAI2	1p35.2	1682.42	26.3528	1479.23	1254.33	2109.06	1250.28	1973.7	1555.82	1717.66	2384.86	1687.37	1503.53	1049.46	2199.6	1965.83	2089.18	1265.82	2205.1	1982.84	888.445	1299.69	3326.51	2049.31	1329.05	3363.09	762.524	5.96019	6.46084e-161	2.57426e-158	5.75001	4.45147e-29	6.20597e-27	-0.709115	0.00729818	0.0555214	-0.593699	0.0170308	0.0971978	-0.155067	0.54874	0.807891	-0.067935	0.769722	0.914312	0.0539167	0.899874	0.999992
ENSG00000130226	DPP6	7q36.2	1665.81	13.5496	1343.28	1125.16	2189.71	772	2231.67	1555.52	1846.13	2630.32	942.004	1389.91	901.757	2314.71	2276.66	2169.25	811.849	2590.55	2874.98	784.406	874.932	4254.08	2126.21	896.17	4299.54	782.301	6.85576	2.42938e-96	3.02315e-94	6.48238	5.51865e-18	2.72779e-16	-0.923229	0.0211876	0.109094	-1.4251	5.61027e-06	0.000307613	-0.196693	0.613732	0.842543	-0.239042	0.4425	0.733438	0.58613	0.205966	0.999992
ENSG00000186472	PCLO	7q21.11	1650.8	16.7705	6.5604	2.56802e-142	7.24216e-140	-0.686564	0.016244	0.161761		Membrane	The protein encoded by this gene is part of the presynaptic cytoskeletal matrix, which is involved in establishing active synaptic zones and in synaptic vesicle trafficking. Variations in this gene have been associated with bipolar disorder and major depressive disorder.																6.5604	2.56802e-142	7.24216e-140	-0.686564	0.016244	0.161761		Membrane					-0.686564	0.016244	0.161761		Membrane
ENSG00000130477	UNC13A	19p13.11	1646.63	14.4935	2544.97	1703.89	1760.52	1679.02	1653.3	1461.13	1857.27	1211.75	1204.8	1847.29	1612.96	1468.33	2006.48	2156.61	1727.03	1817.37	2051.35	835.749	1813.53	2643.02	2117.4	1856.22	2665.46	779.688	6.78061	1.57633e-202	2.07454e-199	7.36727	3.51744e-53	2.67748e-50	0.0627796	0.808957	0.909428	0.105486	0.570527	0.76752	-0.313949	0.177439	0.500936	-0.315363	0.0869969	0.365558	-0.296011	0.465912	0.999992
ENSG00000102362	SYTL4	Xq22.1	1608.9	83.5372	1511.59	2454.96	1335.53	2060.54	1356.04	1465.59	1806.39	1256.45	1710.57	1944.07	3021.16	1535.51	1267.94	2078.19	2202.29	1343.75	2489.47	996.502	2437.58	1376.81	2041.14	2491.44	1393.98	796.018	4.24223	9.43118e-77	8.73339e-75	4.12947	2.66758e-14	8.06418e-13	0.763611	0.0116433	0.074883	0.498786	0.0727498	0.243301	-0.295667	0.28858	0.619919	-0.245147	0.367541	0.677134	-0.640593	0.131983	0.999992
ENSG00000133083	DCLK1	13q13.3	1515.73	11.6808	1623.58	1962.86	1471.82	1615.38	1471.49	1445.89	1618.23	1550.71	1366.99	2160.1	1829.35	1426.5	1563.05	2131.99	1519.96	1802.41	2041.3	793.702	1377.11	3326.99	2094.5	1408.16	3348.89	769.602	6.94417	2.77182e-153	9.55398e-151	6.99527	3.88342e-35	8.12104e-33	0.36641	0.255662	0.494752	0.144233	0.561734	0.761854	-0.234616	0.431989	0.727773	-0.210002	0.418147	0.714336	-0.187914	0.657301	0.999992
ENSG00000167371	PRRT2	16p11.2	1429.62	28.822	1592.38	1476.07	1487.29	1554.36	1374.73	1399.24	1429.4	1897.11	1623.23	1625.59	1372.65	1514.12	1442.11	2183.73	1610.04	1640.01	1485.56	708.403	1710.6	2875.61	2141.97	1749.93	2911.63	797.831	5.59712	1.88154e-137	4.80678e-135	5.72144	2.38704e-30	3.56278e-28	0.0538603	0.857858	0.93356	0.22502	0.380318	0.622642	-0.0291432	0.913131	0.971604	-0.0269623	0.916865	0.970515	0.0481596	0.908273	0.999992
ENSG00000174136	RGMB	5q15	1413.5	58.2714	1913.39	1818.54	1292.7	1511.21	1378.62	1373.1	1504.14	1230.68	1313.28	1903.24	1789.71	1247.38	1400.71	2460.77	1526.75	1823.3	1811.57	881.566	1561.94	3881.78	2415.82	1597.3	3913.21	916.042	4.57545	2.0496e-105	2.95728e-103	4.98349	3.36503e-26	3.65923e-24	0.460802	0.0834405	0.256886	0.182532	0.430459	0.664401	-0.0933268	0.69219	0.88053	-0.0951337	0.699293	0.880047	-0.357401	0.302651	0.999992
ENSG00000141622	RNF165	18q21.1	1412.5	80.8816	1401.56	1375.34	1595.23	1228.55	1545.54	1326.81	1508.58	1416.29	1173.03	1463.42	1328.62	1637.01	1617.66	2037.6	1392.09	1723.1	1842.03	714.696	1660.56	2576.34	1999.16	1698	2607.2	778.933	4.105	2.64945e-94	3.21412e-92	4.07641	1.50472e-18	7.98741e-17	-0.113517	0.655017	0.820652	-0.243258	0.227397	0.473463	-0.161866	0.479243	0.761556	-0.149914	0.45276	0.740399	-0.0318546	0.941758	0.999992
ENSG00000061676	NCKAP1	2q32.1	1358.12	63.2357	1594.02	1444.82	1419.76	1349.84	1385.68	1243.68	1504.93	1155.52	1200.15	1417.14	1512.62	1356.72	1525.59	1682.31	1336.75	1522.9	1677.3	893.88	1327.34	2207.64	1651.92	1357.89	2227.45	641.316	4.41508	3.76368e-176	2.17942e-173	4.6341	7.6286e-41	2.25073e-38	0.0529919	0.789638	0.899099	-0.0165682	0.911052	0.961492	-0.215767	0.223396	0.553073	-0.204639	0.177794	0.499857	-0.176679	0.605991	0.999992
ENSG00000135472	FAIM2	12q13.12	1355.15	6.46183	2159.39	1262.27	1433.87	1194.49	1467.25	1325.45	1407.87	1318.04	1080.56	1332.26	1231.4	1519.79	1437.75	2696.42	1370.78	1990.64	1761.41	858.284	1654.73	4351.11	2649.43	1693.29	4382.54	968.303	7.65395	9.33866e-153	3.14402e-150	8.25543	3.93366e-39	1.03969e-36	-0.253128	0.497735	0.713226	-0.367173	0.164889	0.393118	-0.168271	0.617791	0.844787	-0.0942375	0.725008	0.894296	0.0837263	0.840042	0.999992
ENSG00000162738	VANGL2	1q23.2	1330.77	56.9431	1667.95	1863.69	1239.79	1521	1229.58	1342.54	1344.56	1531.76	1535.68	1950.7	1834.22	1425.82	1162.68	2125.06	1774.15	1349.05	1605.96	742.164	2187.97	1917.65	2086.45	2236.76	1941.3	795.452	4.5214	1.66844e-109	2.53359e-107	4.82191	8.38941e-27	9.64655e-25	0.638541	0.0115253	0.0744732	0.405154	0.0682066	0.23453	-0.121762	0.609228	0.839996	-0.110258	0.615191	0.838088	-0.0970165	0.810707	0.999992
ENSG00000146555	SDK1	7p22.2	1302.63	22.8228	1366.92	713.282	1787.7	604.231	1756.04	1091.34	1564.33	1398.5	488.698	950.969	503.4	1531.19	2069.98	994.812	556.486	1745.31	1833.91	581.602	483.377	1802.6	974.957	495.396	1827.53	369.255	5.77637	3.18166e-89	3.51602e-87	5.78233	4.80237e-18	2.37993e-16	-1.22138	0.00027048	0.00579739	-1.31605	9.70033e-06	0.000459933	-0.396756	0.229209	0.560072	-0.207503	0.478228	0.754564	0.470525	0.294927	0.999992
ENSG00000166206	GABRB3	15q12	1301.81	10.3427	1840.99	1708.01	1178.03	1512.39	1190.88	1328.73	1293.36	1191.64	1087.7	1813.8	1653.41	1293.4	1135.57	1812.65	1597.31	1301.05	1659.73	928.372	1744.77	1839.76	1779.36	1784.58	1860.7	654.026	6.9248	1.27153e-231	5.02024e-228	7.39574	1.56429e-66	2.83509e-63	0.532164	0.0403636	0.164123	0.358463	0.0587494	0.213203	-0.0101186	0.966433	0.988757	-0.0149255	0.937302	0.978608	-0.16228	0.692784	0.999992
ENSG00000154556	SORBS2	4q35.1	1267.11	13.4768	6.49204	2.92849e-121	5.38917e-119	-0.521139	0.11717	0.414745	Membrane	Nucleus																	6.49204	2.92849e-121	5.38917e-119	-0.521139	0.11717	0.414745	Membrane	Nucleus					-0.521139	0.11717	0.414745	Membrane	Nucleus
ENSG00000132872	SYT4	18q12.3	1248.82	7.45784	1321.03	1443.82	1232.67	1401.33	1172.19	1074.71	1472.01	1839.36	1487.11	821.207	2090.47	1367.7	1216.52	1863.72	1348.38	1459.34	1888.74	531.799	1273.97	2779.32	1830.15	1302.78	2803.4	670.802	7.34141	4.41022e-138	1.15383e-135	7.36513	5.48256e-29	7.58786e-27	0.116093	0.756891	0.88198	0.158802	0.571404	0.768019	-0.310942	0.340064	0.662031	-0.346345	0.221871	0.550341	-0.257742	0.504426	0.999992
ENSG00000065609	SNAP91	6q14.2	1236.62	6.39796	1452.68	1451.19	1194.5	1352.54	1181.91	1240.49	1283.07	1278.13	974.997	1548.38	1398.88	1227.87	1263.53	1997.13	1455.18	1421.76	1382.65	846.398	1629.07	2532.26	1960.85	1667.43	2555.48	717.545	7.51379	1.99494e-156	7.28071e-154	7.69231	8.95341e-38	2.1985e-35	0.230068	0.522304	0.730193	0.204876	0.447512	0.677398	-0.0568947	0.861266	0.951492	-0.0607922	0.819708	0.933894	-0.0670624	0.878387	0.999992
ENSG00000008277	ADAM22	7q21.12	1229.58	72.7987	1514.9	1439.96	1242.42	1372.42	1157.97	1090.29	1393.56	1039.54	1199.85	1123.71	1787.82	1313.72	1240.04	1766.83	1546.44	1224.94	1470.71	643.758	1829.48	1575.92	1734.24	1872.13	1594.34	677.31	4.05486	4.67694e-79	4.49379e-77	4.32803	4.27876e-21	2.95553e-19	0.18928	0.491255	0.70848	0.231724	0.376319	0.619937	-0.370802	0.140367	0.452234	-0.371381	0.145052	0.458336	-0.571329	0.152423	0.999992
ENSG00000128641	MYO1B	2q32.3	1228.68	51.312	2196.49	1410.43	1170.35	1434.07	1125.39	1160.07	1326.93	836.924	1261.9	1474.49	1387.28	1018.26	1316.58	1627.17	1465.25	1221.37	1542.05	715.952	1525.5	1722.91	1597.53	1560.23	1741.28	613.913	4.56078	3.20239e-124	6.20893e-122	5.36857	1.51837e-36	3.37949e-34	0.299759	0.23006	0.465989	0.376207	0.094681	0.284885	-0.13438	0.542849	0.80507	-0.192817	0.389135	0.693654	-0.478747	0.243549	0.999992
ENSG00000103546	SLC6A2	16q12.2	1219.18	7.26031	7.28185	5.03101e-92	5.84216e-90	-0.508216	0.234693	0.564927	Membrane	Cytoplasm																	7.28185	5.03101e-92	5.84216e-90	-0.508216	0.234693	0.564927	Membrane	Cytoplasm					-0.508216	0.234693	0.564927	Membrane	Cytoplasm
ENSG00000017373	SRCIN1	17q12	1199.17	13.9609	944.094	1050.6	1378.71	940.074	1373.73	1090.62	1342.02	1217.19	997.085	1176.28	958.882	1313.95	1502.43	1900.67	1091.33	1620.11	1467.13	728.9	1338.06	2755.39	1864.77	1370.14	2788.47	687.363	6.37959	1.38589e-180	9.11958e-178	6.01617	6.35681e-36	1.37466e-33	-0.316963	0.243912	0.481429	-0.463632	0.0361879	0.157431	-0.273537	0.278881	0.611277	-0.205734	0.350571	0.664413	-0.0756421	0.847342	0.999992
ENSG00000156453	PCDH1	5q31.3	1175.56	38.6064	1656.46	818.035	1496.63	796.076	1420.88	1055.84	1328.29	1127.87	858.401	704.489	952.167	1605.63	1514.46	951.213	711.119	1431.89	1779.07	634.724	579.078	1537.15	933.047	592.745	1551.96	364.024	4.89206	7.43781e-76	6.71568e-74	5.32361	1.12266e-18	6.00119e-17	-0.709201	0.0359821	0.152823	-0.711405	0.00723412	0.0550708	-0.342081	0.277109	0.60984	-0.308475	0.239274	0.56982	-0.217399	0.582815	0.999992
ENSG00000162849	KIF26B	1q44	1161.31	49.024	866.525	1207.77	1235.59	1189.31	1159.71	1067.16	1254.79	371.958	376.498	1371.54	1083.92	1028.34	1391.4	1183.11	1240.67	1097.55	1435.12	1188.59	1340.79	860.775	1161.95	1372.25	871.118	454.016	4.5263	6.55584e-60	4.32049e-58	4.0694	4.28826e-11	7.90752e-10	0.0673385	0.860955	0.935444	0.156597	0.676953	0.835172	-0.175698	0.615119	0.843603	-0.22725	0.537692	0.793261	-0.32919	0.375425	0.999992
ENSG00000132639	SNAP25	20p12.2	1155.5	9.65339	1516.54	1287.16	1140.97	1219.82	1130.02	1112.74	1229.11	1019.33	894.296	1244.13	1365.86	1152.67	1193.25	2326.01	1632.88	1333.04	1405.94	788.385	2298.29	2275.78	2284.77	2350.44	2294.84	837.537	6.87301	2.652e-214	5.23528e-211	7.24359	1.013e-61	1.37696e-58	0.20115	0.457287	0.682851	0.116944	0.619759	0.799993	-0.15156	0.537127	0.801763	-0.158213	0.494199	0.763837	-0.307134	0.473512	0.999992
ENSG00000138162	TACC2	10q26.13	1099.36	15.117	2222.02	1302.15	1042.38	1382.92	940.612	1031.73	1118.77	927.228	878.422	973.705	1656.41	1224.9	851.198	1506.37	1444.66	1009.28	1433.14	651.624	1550.93	1361.61	1479.22	1586.46	1377.16	547.915	6.12607	3.37549e-126	6.75566e-124	7.07375	6.39145e-35	1.32206e-32	0.373964	0.270864	0.511744	0.577676	0.0118385	0.0767661	-0.154938	0.590437	0.829861	-0.14846	0.5089	0.774347	-0.136889	0.752107	0.999992
ENSG00000197702	PARVA	11p15.3	1077.34	7.84654	281.443	826.789	1381.67	645.795	1356.31	958.913	1242.53	1611.07	669.91	554.39	1115.2	1704.2	1270.74	1073.34	690.35	1380.12	1691.44	610.776	762.817	1551.89	1053.38	780.048	1565.16	388.284	7.00592	8.12813e-97	1.0173e-94	5.09604	9.07919e-12	1.86182e-10	-0.846802	0.0546136	0.198222	-1.08735	0.00272258	0.0281863	-0.110552	0.783439	0.921624	-0.345992	0.328122	0.645841	0.407872	0.401014	0.999992
ENSG00000158445	KCNB1	20q13.13	1062.87	12.8974	928.546	1006.81	1202.13	828.917	1221.36	943.294	1219.92	1239.56	1127.37	990.435	1052.41	1158.74	1310.03	965.906	758.282	1253.01	1361.94	745.371	654.956	1447.33	947.55	669.866	1462.47	352.999	6.31879	6.4748e-129	1.36505e-126	6.085	2.12325e-24	1.95668e-22	-0.189609	0.591975	0.780563	-0.480049	0.0314375	0.143735	-0.322976	0.29054	0.621385	-0.316209	0.151672	0.467788	0.0411108	0.910152	0.999992
ENSG00000152932	RAB3C	5q11.2	1031.51	11.9081	893.496	991.089	1174.95	800.299	1183.65	979.226	1116.67	1105.79	778.696	1118.82	897.086	1183.7	1252.5	1262.93	762.193	1355.08	1015.62	667.874	701.812	2163.98	1240.25	717.842	2178.97	458.856	6.35861	1.18495e-91	1.36144e-89	6.08934	8.35501e-19	4.57542e-17	-0.35753	0.389085	0.626481	-0.600086	0.105134	0.30277	-0.0743419	0.845728	0.945537	-0.0822005	0.822573	0.934833	0.00740374	0.986844	0.999992
ENSG00000120251	GRIA2	4q32.1	990.753	6.82239	7.07981	1.48424e-106	2.17038e-104	-0.684878	0.068421	0.324989	Membrane																		7.07981	1.48424e-106	2.17038e-104	-0.684878	0.068421	0.324989	Membrane						-0.684878	0.068421	0.324989	Membrane
ENSG00000189056	RELN	7q22.1	974.861	15.9977	4.57047	3.53956e-16	6.02836e-15	-1.46112	0.0315745	0.222063	Extracellular	Membrane	This gene encodes a large secreted extracellular matrix protein thought to control cell-cell interactions critical for cell positioning and neuronal migration during brain development. This protein may be involved in schizophrenia, autism, bipolar disorder, major depression and in migration defects associated with temporal lobe epilepsy. Mutations of this gene are associated with autosomal recess…																4.57047	3.53956e-16	6.02836e-15	-1.46112	0.0315745	0.222063	Extracellular	Membrane					-1.46112	0.0315745	0.222063	Extracellular	Membrane
ENSG00000198626	RYR2	1q43	917.996	12.0144	6.16917	8.52472e-72	7.1335e-70	-1.36437	0.000459782	0.0301802	Other	Cytoplasm+Membrane	This gene encodes a ryanodine receptor found in cardiac muscle sarcoplasmic reticulum. The encoded protein is one of the components of a calcium channel, composed of a tetramer of the ryanodine receptor proteins and a tetramer of FK506 binding protein 1B proteins, that supplies calcium to cardiac muscle.																6.16917	8.52472e-72	7.1335e-70	-1.36437	0.000459782	0.0301802	Other	Cytoplasm+Membrane					-1.36437	0.000459782	0.0301802	Other	Cytoplasm+Membrane
ENSG00000133958	UNC79	14q32.12	908.69	11.7616	888.946	1048.76	929.931	951.102	896.103	832.529	1011.46	719.85	577.282	1135.01	994.266	830.697	1042.78	1176.73	1018.18	943.28	1149.58	706.157	1135.11	1192.2	1155.12	1161.96	1204.81	427.773	6.23274	2.57993e-171	1.31819e-168	6.17821	3.64174e-42	1.12687e-39	0.177913	0.519061	0.727824	0.150997	0.553816	0.756655	-0.265985	0.297665	0.62753	-0.292662	0.240188	0.570452	-0.260491	0.533623	0.999992
ENSG00000151276	MAGI1	3p14.1	877.658	14.3623	695.103	1364.06	749.864	1193.95	695.793	788.054	954.812	761.735	745.186	1457.15	1311.32	616.437	812.595	1434.51	1335.75	771.184	1014.33	434.922	1566.34	1139.27	1408.28	1602.54	1153.22	521.543	5.89081	2.8948e-139	7.71296e-137	5.53475	5.24416e-26	5.63821e-24	0.803522	0.0041957	0.0385786	0.747294	0.000608393	0.00993821	-0.325294	0.221899	0.551606	-0.410459	0.0504195	0.286267	-0.164248	0.664805	0.999992
ENSG00000260230	FRRS1L	9q31.3	871.5	6.2801	274.655	968.426	952.989	712.459	979.052	851.234	923.29	1271.28	861.214	1238.93	735.383	948.061	1023.23	1113.97	710.541	1113.54	997.755	561.8	712.559	1741.18	1093.38	729.199	1758.75	401.819	7.04962	7.50587e-147	2.27958e-144	5.39784	1.0261e-20	6.87562e-19	-0.0366708	0.912302	0.960898	-0.446738	0.120729	0.329199	-0.131926	0.674485	0.87184	-0.0756162	0.79243	0.92432	-0.0320138	0.935074	0.999992
ENSG00000108018	SORCS1	10q25.1	833.499	5.85708	1032.71	321.772	1209.96	333.011	1149.67	822.833	876.366	1795.7	368.296	440.498	215.734	1402.23	1175.3	1431.45	304.802	1548.12	1511.29	355.074	263.272	3340.68	1402.5	269.555	3375.21	514.127	7.01637	1.90075e-78	1.79456e-76	7.2156	1.20585e-17	5.80209e-16	-1.92829	1.54543e-06	0.000113646	-1.65058	4.45283e-06	0.000259945	-0.0763244	0.86172	0.951643	0.310922	0.39624	0.698829	0.831194	0.0916928	0.999992
ENSG00000050820	BCAR1	16q23.1	798.576	14.5597	1482.16	763.827	795.879	846.371	782.641	784.939	814.128	949.823	1042.46	661.704	885.106	904.534	732.424	1142.36	918.895	862.704	1008.65	556.326	1042.39	1258.35	1121.72	1066.08	1271.85	417.393	5.74814	1.44625e-147	4.48648e-145	6.59912	1.82873e-42	5.84886e-40	0.0107039	0.971003	0.988333	0.135221	0.525748	0.736	-0.0475075	0.85197	0.948106	-0.0517336	0.807654	0.929338	-0.128275	0.755941	0.999992
ENSG00000179242	CDH4	20q13.33	786.303	15.9706	431.007	274.314	1224.51	185.627	1166.42	782.053	827.66	1358.51	538.068	273.404	283.258	1610.29	1073.54	781.888	208.016	1245.71	831.135	556.03	242.89	1654.77	764.92	248.696	1673.51	288.489	5.54197	1.22475e-52	6.9349e-51	4.65603	3.20729e-08	3.58922e-07	-2.21348	1.96392e-07	2.2771e-05	-2.54497	2.56856e-10	9.11966e-08	-0.203846	0.651237	0.861439	-0.332442	0.394821	0.697653	0.282314	0.529813	0.999992
ENSG00000214944	ARHGEF28	5q13.2	772.84	19.5174	5.24979	3.28148e-69	2.62458e-67	-0.878951	0.0145282	0.153497	Membrane	Cytoplasm+Membrane																	5.24979	3.28148e-69	2.62458e-67	-0.878951	0.0145282	0.153497	Membrane	Cytoplasm+Membrane					-0.878951	0.0145282	0.153497	Membrane	Cytoplasm+Membrane
ENSG00000182168	UNC5C	4q22.3	766.462	12.6732	693.778	1307.09	554.913	1141.84	545.539	667.761	904.002	834.784	1281.87	987.055	1657.16	586.319	573.656	1209.44	1144.21	671.029	648.99	615.6	1158.52	1249.8	1188.55	1183.73	1260.53	440.59	5.8291	1.20227e-57	7.57832e-56	5.60764	1.01112e-11	2.06013e-10	1.21711	0.0141514	0.0848929	1.04139	0.0136807	0.0846563	-0.481219	0.285531	0.616688	-0.411098	0.31658	0.638373	-0.588089	0.16484	0.999992
ENSG00000138696	BMPR1B	4q22.3	765.227	7.36065	261.247	653.14	927.055	465.464	957.825	681.863	888.837	674.513	703.22	841.63	489.051	817.771	1080.19	760.691	475.749	991.266	942.371	590.762	498.565	1166.76	746.317	509.622	1181.58	276.285	6.58588	3.21388e-67	2.44875e-65	5.0344	2.51234e-09	3.45446e-08	-0.420099	0.412871	0.646416	-0.888028	0.053992	0.202022	-0.324716	0.480278	0.762484	-0.234961	0.598372	0.8275	-0.487071	0.243846	0.999992
ENSG00000164418	GRIK2	6q16.3	714.274	3.95827	7.42709	7.79534e-159	2.99603e-156	-0.533137	0.0779397	0.345419	Membrane																		7.42709	7.79534e-159	2.99603e-156	-0.533137	0.0779397	0.345419	Membrane						-0.533137	0.0779397	0.345419	Membrane
ENSG00000165566	AMER2	13q12.13	699.049	4.2491	355.854	608.63	860.414	590.977	773.717	630.87	722.493	1272.8	1100.07	518.591	714.748	963.261	742.218	282.916	434.431	703.293	867.057	272.239	192.421	422.497	277.35	196.616	427.728	103.625	7.20658	2.73849e-57	1.71126e-55	6.14203	6.31516e-10	9.68783e-09	-0.44351	0.444353	0.672571	-0.304245	0.548208	0.752939	-0.302917	0.571435	0.819965	-0.276144	0.569592	0.811204	-0.294888	0.46418	0.999992
ENSG00000146013	GFRA3	5q31.2	697.298	4.57497	7.13201	2.69105e-66	2.02903e-64	-1.11941	0.0199689	0.178215	Membrane	Cytoplasm+Membrane																	7.13201	2.69105e-66	2.02903e-64	-1.11941	0.0199689	0.178215	Membrane	Cytoplasm+Membrane					-1.11941	0.0199689	0.178215	Membrane	Cytoplasm+Membrane
ENSG00000162105	SHANK2	11q13.4	692.192	10.0135	6.04697	2.28433e-103	3.18998e-101	-0.516842	0.107297	0.399002	Membrane																		6.04697	2.28433e-103	3.18998e-101	-0.516842	0.107297	0.399002	Membrane						-0.516842	0.107297	0.399002	Membrane
ENSG00000150471	LPHN3	4q13.1	683.29	9.39456	712.7	876.607	677.092	778.6	633.003	638.238	737.19	669.979	605.484	918.4	861.33	643.931	717.365	1002.76	871.653	681.417	658.08	326.276	1024.3	918.006	985.023	1047.27	928.496	364.391	6.11709	2.29864e-123	4.32165e-121	6.13822	4.38503e-28	5.65743e-26	0.360806	0.198871	0.429747	0.352647	0.220638	0.465254	-0.259372	0.389561	0.700064	-0.280137	0.321182	0.641462	0.0620808	0.85916	0.999992
ENSG00000107186	MPDZ	9p23	675.458	21.831	4.92918	9.5363e-154	3.34001e-151	-0.502442	0.0169991	0.165395	Membrane																		4.92918	9.5363e-154	3.34001e-151	-0.502442	0.0169991	0.165395	Membrane						-0.502442	0.0169991	0.165395	Membrane
ENSG00000144045	DQX1	2p13.1	671.423	8.33566	373.141	569.501	785.814	611.904	721.491	524.566	800.044	739.074	505.07	577.448	577.124	547.158	926.546	679.803	638.203	696.531	935.914	420.587	688.247	633.997	667.204	703.526	641.115	248.089	6.27491	1.6581e-147	5.1072e-145	5.41708	5.36556e-24	4.71624e-22	-0.295653	0.338825	0.580529	-0.121963	0.666253	0.828436	-0.356141	0.182554	0.507248	-0.399058	0.143158	0.456365	0.236766	0.526664	0.999992
ENSG00000110436	SLC1A2	11p13	644.403	39.5216	333.872	884.484	617.969	712.174	611.09	593.69	706.513	718.09	780.303	939.396	856.716	601.671	646.871	950.524	755.656	698.642	645.487	381.78	828.926	1108.93	933.072	847.782	1122.01	364.666	4.01028	2.2105e-61	1.50238e-59	3.06631	4.24236e-08	4.62648e-07	0.489572	0.136129	0.344667	0.242893	0.376537	0.619944	-0.340933	0.253549	0.585523	-0.325771	0.229536	0.558203	-0.317583	0.34173	0.999992
ENSG00000162545	CAMK2N1	1p36.12	633.749	17.448	751.857	388.361	815.065	339.495	823.376	626.791	675.125	1131.37	696.883	413.786	374.841	978.029	785.104	794.862	362.092	927.942	953.293	320.499	401.099	1426.19	780.137	410.458	1439.14	294.992	5.14995	6.5336e-64	4.69792e-62	5.33973	1.24422e-13	3.40193e-12	-1.08838	0.00535216	0.04552	-1.31306	0.000117773	0.0030044	-0.109273	0.765602	0.914542	-0.063239	0.849187	0.944047	-0.0318698	0.937701	0.999992
ENSG00000134769	DTNA	18q12.1	633.271	18.1414	385.253	741.417	657.921	615.195	654.728	638.516	649.859	716.348	564.483	882.235	625.771	716.765	663.082	920.85	702.372	712.867	811.503	417.38	845.536	1002.11	904.192	864.862	1013.86	340.545	5.09809	4.0618e-130	8.86451e-128	4.37783	3.34455e-20	2.11803e-18	0.163284	0.539814	0.742619	-0.0340405	0.875645	0.943891	-0.0370605	0.879074	0.95893	-0.0324691	0.879161	0.95601	0.00328538	0.993477	0.999992
ENSG00000198216	CACNA1E	1q25.3	630.024	11.9298	1039.39	977.446	418.506	1111.76	344.942	611.505	613.077	277.209	469.013	1015.77	966.206	240.502	470.586	971.862	1183.13	343.572	631.318	493.513	1308.24	357.543	955.337	1337.76	362.156	355.2	5.64106	2.16559e-57	1.35521e-55	6.24051	3.35815e-15	1.15457e-13	1.2816	0.00465102	0.0413646	1.72446	8.82381e-06	0.000424849	-0.187523	0.66526	0.868006	-0.676155	0.0686624	0.32858	-1.16598	0.0074274	0.999992
ENSG00000169851	PCDH7	4p15.1	624.206	5.8089	881.129	385.546	807.758	390.19	773.826	558.815	727.254	1009.33	252.396	313.876	465.927	824.764	875.856	421.11	350.798	740.629	970.004	296.568	287.844	625.597	412.489	294.461	633.32	153.793	6.60357	1.85372e-55	1.11198e-53	6.92331	1.83307e-13	4.8822e-12	-1.05187	0.0620423	0.213504	-0.961667	0.0336269	0.149911	-0.200172	0.687615	0.87902	-0.230466	0.593972	0.825501	0.755515	0.0971415	0.999992
ENSG00000184144	CNTN2	1q32.1	612.716	10.6011	5.78643	2.14306e-84	2.22131e-82	-0.819855	0.0148036	0.154898	Membrane																		5.78643	2.14306e-84	2.22131e-82	-0.819855	0.0148036	0.154898	Membrane						-0.819855	0.0148036	0.154898	Membrane
ENSG00000104067	TJP1	15q13.1	609.136	14.3363	995.746	451.816	743.209	420.966	737.845	535.253	727.86	541.146	691.697	443.91	472.459	712.936	841.963	581.707	406.316	755.121	913.252	384.649	389.643	878.133	571.189	398.79	887.391	216.95	5.35733	2.23738e-73	1.92415e-71	5.98486	2.74252e-18	1.41821e-16	-0.595017	0.137973	0.347373	-0.698066	0.0258517	0.126846	-0.400071	0.206521	0.533678	-0.320628	0.215019	0.54307	-0.582567	0.0984115	0.999992
ENSG00000152092	ASTN1	1q25.2	601.862	5.52327	1078.58	628.447	633.861	625.148	593.304	615.669	591.436	513.014	468.845	564.588	708.803	797.658	543.217	1007.42	683.487	729.384	631.129	408.577	779.251	1350.58	988.905	797.579	1362.12	363.35	6.68684	4.14402e-112	6.64114e-110	7.45075	3.32195e-32	5.72097e-30	0.00943487	0.980307	0.992017	0.0718862	0.820822	0.915415	-0.0523908	0.879699	0.95893	-0.0172311	0.956592	0.986541	-0.251644	0.582907	0.999992
ENSG00000169213	RAB3B	1p32.3	600.111	10.9313	341.576	255.194	825.982	206.794	850.754	579.951	651.784	875.411	510.081	339.591	180.89	891.631	860.051	918.861	209.004	1069.65	881.45	429.718	215.356	2077.64	902.88	220.683	2089.24	335.553	5.70619	3.64367e-60	2.42707e-58	4.87778	1.27181e-09	1.85035e-08	-1.62149	2.31798e-05	0.000922798	-1.89419	1.35143e-07	1.58212e-05	-0.0291672	0.94477	0.981434	0.142922	0.69009	0.875424	0.331341	0.446939	0.999992
ENSG00000272636	DOC2B	17p13.3	576.702	7.36706	636.882	565.327	623.708	477.142	646.067	514.761	674.371	583.015	455.295	552.838	594.369	580.686	715.207	423.65	377.492	658.05	904.216	405.026	224.237	741.096	415.44	229.691	748.603	155.846	6.25312	7.46379e-100	9.79313e-98	6.33315	4.6697e-21	3.2081e-19	-0.051201	0.89159	0.950609	-0.302247	0.280179	0.530893	-0.375752	0.249033	0.580346	-0.322146	0.232847	0.5619	0.0183175	0.96502	0.999992
ENSG00000006283	CACNA1G	17q21.33	557.429	17.4794	66.8933	247.519	850.048	376.098	674.63	455.545	545.428	1117.32	129.219	382.04	123.718	766.696	765.506	955.499	316.128	942.486	882.13	153.033	222.525	2143.19	934.677	227.709	2171.53	351.28	4.88117	1.56038e-23	3.96996e-22	2.07522	0.0584552	0.111207	-1.78111	0.00262085	0.0283342	-0.639265	0.232577	0.479105	-0.0406962	0.94542	0.98183	0.26006	0.600397	0.829167	1.52731	0.0012068	0.868407
ENSG00000148498	PARD3	10p11.21	551.749	24.3951	753.772	738.68	490.885	675.654	484.668	547.138	546.147	488.437	511.003	752.329	746.195	522.01	455.443	658.582	682.544	493.063	686.25	349.539	697.414	559.744	646.556	714.004	566.541	250.768	4.47153	2.31459e-110	3.57732e-108	4.89495	1.18083e-28	1.59937e-26	0.57463	0.0275476	0.128278	0.475268	0.0137364	0.0848661	-0.0405455	0.853956	0.948355	-0.0449191	0.813828	0.931974	-0.288185	0.428908	0.999992
ENSG00000165186	PTCHD1	Xp22.11	537.192	7.57985	6.05085	5.20175e-59	3.37182e-57	-0.574386	0.20223	0.529708	Membrane																		6.05085	5.20175e-59	3.37182e-57	-0.574386	0.20223	0.529708	Membrane						-0.574386	0.20223	0.529708	Membrane
ENSG00000160097	FNDC5	1p35.1	534.032	28.1089	4.20654	8.69658e-46	4.22003e-44	-0.941958	0.00628101	0.101076	Membrane																		4.20654	8.69658e-46	4.22003e-44	-0.941958	0.00628101	0.101076	Membrane						-0.941958	0.00628101	0.101076	Membrane
ENSG00000146006	LRRTM2	5q31.2	524.884	27.1441	499.384	663.619	513.868	615.35	476.427	463.172	599.027	416.595	557.92	618.591	726.36	478.968	558.196	576.685	633.571	457.579	570.028	241.758	667.567	395.777	566.477	682.313	400.37	223.416	4.25672	1.82815e-85	1.93179e-83	4.16447	4.25203e-17	1.89499e-15	0.466241	0.0741039	0.238741	0.497027	0.0452755	0.181487	-0.372473	0.133077	0.440773	-0.427362	0.0747525	0.341169	-0.582501	0.148211	0.999992
ENSG00000179915	NRXN1	2p16.3	517.581	9.7642	945.469	533.526	529.974	564.172	494.563	528.831	510.601	435.981	340.734	575.053	508.178	572.794	517.842	975.286	639.239	638.913	676.203	286.021	763.334	1292.17	957.323	780.855	1303.15	354.555	5.66081	1.61781e-97	2.06046e-95	6.46747	3.95717e-29	5.57815e-27	0.00561814	0.986747	0.994678	0.187204	0.465051	0.69137	-0.0456218	0.881891	0.960021	-0.0235548	0.9278	0.974809	-0.149268	0.735289	0.999992
ENSG00000147256	ARHGAP36	Xq26.1	517.508	2.94054	7.19828	1.30282e-36	5.07457e-35	-0.87705	0.189077	0.515358	Cytoplasm	Membrane																	7.19828	1.30282e-36	5.07457e-35	-0.87705	0.189077	0.515358	Cytoplasm	Membrane					-0.87705	0.189077	0.515358	Cytoplasm	Membrane
ENSG00000135298	BAI3	6q12	513.26	7.17696	6.0608	5.72709e-112	9.14439e-110	-0.687919	0.0265084	0.20286	Membrane																		6.0608	5.72709e-112	9.14439e-110	-0.687919	0.0265084	0.20286	Membrane						-0.687919	0.0265084	0.20286	Membrane
ENSG00000185565	LSAMP	3q13.32	512.887	6.1621	6.28979	1.15012e-65	8.49485e-64	-0.560867	0.201914	0.529512	Membrane	Cytoplasm																	6.28979	1.15012e-65	8.49485e-64	-0.560867	0.201914	0.529512	Membrane	Cytoplasm					-0.560867	0.201914	0.529512	Membrane	Cytoplasm
ENSG00000196876	SCN8A	12q13.13	512.66	20.7966	527.665	564.286	542.366	511.172	521.031	466.451	566.008	565.869	491.208	545.383	598.675	570.415	540.06	491.079	471.23	531.065	599.944	320.624	410.843	601.243	481.868	420.52	608.341	188.56	4.59427	1.16338e-132	2.67332e-130	4.61725	1.74108e-27	2.12338e-25	0.0794182	0.734519	0.869793	-0.00933051	0.963107	0.984247	-0.314944	0.137948	0.448735	-0.299332	0.132216	0.442638	-0.10199	0.795863	0.999992
ENSG00000155816	FMN2	1q43	502.956	5.3854	763.677	633.015	492.512	520.295	497.996	501.236	511.026	473.174	427.098	723.565	564.025	512.956	494.005	397.174	454.585	485.82	717.132	244.58	354.29	450.836	389.807	362.59	455.78	145.275	6.46119	6.18079e-122	1.14714e-119	7.00072	8.35103e-34	1.59719e-31	0.378878	0.250639	0.489049	0.190259	0.380651	0.623092	-0.0658007	0.822576	0.937609	-0.0661546	0.761058	0.911167	0.114085	0.785349	0.999992
ENSG00000182580	EPHB3	3q27.1	492.701	14.8532	603.285	312.749	664.853	215.587	667.539	468.412	525.384	438.268	161.548	491.525	148.372	645.028	717.587	415.827	216.955	674.218	970.577	149.722	220.304	726.17	407.398	225.541	734.279	157.687	4.98909	6.5469e-53	3.7265e-51	5.19362	2.37976e-12	5.34357e-11	-1.19407	0.00250288	0.027342	-1.50603	1.90762e-05	0.000759472	-0.361645	0.330176	0.653194	-0.0627582	0.855105	0.94773	0.646124	0.14798	0.999992
ENSG00000061337	LZTS1	8p21.3	486.703	15.4286	2029.12	598.308	392.259	706.513	354.729	530.398	432.966	185.424	340.004	391.281	816.004	572.907	260.006	677.837	680.186	419.298	588.266	201.677	638.143	713.224	665.892	653.052	720.481	252.11	4.95089	2.97584e-58	1.9006e-56	6.90274	8.07686e-28	1.01454e-25	0.928252	0.015736	0.0909747	1.45803	8.31721e-06	0.000413152	-0.0449863	0.899466	0.966339	0.0338186	0.918658	0.971346	-0.628302	0.143957	0.999992
ENSG00000184349	EFNA5	5q21.3	485.192	14.1641	639.922	477.194	526.556	445.941	517.109	442.183	550.23	563.85	665.568	423.697	542.924	552.959	549.17	593.258	421.737	585.254	538.876	259.23	384.264	918.369	581.824	392.94	928.605	220.723	5.10505	1.43435e-118	2.53227e-116	5.47245	4.81677e-28	6.19346e-26	-0.181464	0.505141	0.71769	-0.265203	0.229893	0.476046	-0.314064	0.21136	0.539432	-0.28488	0.199212	0.525168	-0.445733	0.229882	0.999992
ENSG00000116141	MARK1	1q41	480.238	6.29646	665.259	473.644	532.427	451.6	506.238	442.64	531.502	446.039	460.487	461.889	498.663	532.492	560.433	540.839	454.215	526.931	629.313	286.007	462.734	647.697	530.981	472.957	654.691	197.221	6.23297	5.85082e-194	5.90932e-191	6.68252	1.32263e-59	1.48056e-56	-0.0979436	0.646028	0.814654	-0.1071	0.535031	0.742754	-0.216971	0.276391	0.609431	-0.211538	0.214324	0.542387	-0.328604	0.36192	0.999992
ENSG00000187391	MAGI2	7q21.11	479.757	12.6384	426.065	464.418	544.914	434.033	513.142	438.782	523.963	447.325	332.413	544.46	400.131	487.847	599.18	711.665	523.337	554.115	623.394	235.429	668.42	750.945	698.864	683.953	759.017	262.33	5.19964	2.62945e-106	3.8193e-104	5.00504	2.73262e-22	2.08007e-20	-0.20728	0.413206	0.646472	-0.125008	0.651168	0.81978	-0.23059	0.384805	0.696214	-0.216124	0.426873	0.722177	-0.0300331	0.93967	0.999992
ENSG00000117971	CHRNB4	15q25.1	476.341	4.49261	444.857	339.973	576.432	317.216	583.792	454.563	522.695	489.879	277.428	335.808	353.705	612.331	601.821	504.507	298.286	630.451	593.775	370.365	270.927	876.808	494.883	277.508	885.134	182.939	6.63051	7.57752e-92	8.72923e-90	6.46963	1.9287e-19	1.13809e-17	-0.779084	0.0591472	0.207617	-0.850412	0.00654657	0.0516335	-0.111965	0.767313	0.915408	-0.0757073	0.807198	0.929338	0.286486	0.5141	0.999992
ENSG00000110811	LEPREL2	12p13.31	464.581	21.1954	622.747	461.371	510.715	451.583	478.777	427.822	498.8	544.35	413.98	486.55	449.753	509.684	515.885	638.496	525.883	496.168	676.994	205.538	646.528	593.127	627.011	661.792	600.356	241.623	4.43088	6.11219e-112	9.72353e-110	4.82943	1.05697e-28	1.44188e-26	0.105343	0.634546	0.807767	0.0545669	0.793688	0.902697	-0.24283	0.210792	0.5393	-0.250741	0.218142	0.546473	-0.137776	0.727483	0.999992
ENSG00000070778	PTPN21	14q31.3	463.652	9.23706	517.452	397.326	549.409	376.911	524.98	417.666	526.042	298.047	299.839	409.812	396.419	534.185	595.431	601.87	395.155	582.841	622.289	334.553	428.3	866.232	590.415	438.481	876.033	220.686	5.59295	4.55591e-132	1.0252e-129	5.72223	2.30892e-28	3.04765e-26	-0.439547	0.106516	0.298224	-0.402504	0.0690783	0.235719	-0.320244	0.20275	0.530342	-0.243601	0.267872	0.598726	-0.320966	0.419331	0.999992
ENSG00000137962	ARHGAP29	1p21.3	454.993	22.7087	4.27156	1.14281e-38	4.69114e-37	-0.592641	0.141883	0.454031	Cytoplasm	Membrane																	4.27156	1.14281e-38	4.69114e-37	-0.592641	0.141883	0.454031	Cytoplasm	Membrane					-0.592641	0.141883	0.454031	Cytoplasm	Membrane
ENSG00000073712	FERMT2	14q22.1	453.786	27.6918	856.349	476.381	443.118	502.425	433.469	438.611	480.924	462.61	507.735	432.159	532.787	456.887	453.868	562.357	504.739	461.834	629.628	313.871	514.508	616.66	552.369	526.419	622.85	218.597	4.0279	3.68595e-59	2.40362e-57	4.89079	2.23436e-17	1.02829e-15	0.120709	0.716818	0.858863	0.228546	0.335888	0.584122	-0.0919028	0.746859	0.907024	-0.107448	0.649068	0.856098	-0.289935	0.433547	0.999992
ENSG00000085552	IGSF9	1q23.2	452.72	22.3584	847.396	611.403	373.322	709.054	301.729	417.275	436.892	397.044	632.113	543.823	694.367	313.259	329.316	818.939	795.876	349.873	330.623	235.418	937.298	579.054	804.085	958.74	586.676	306.829	4.30172	1.47377e-49	7.84386e-48	5.13037	6.20606e-15	2.06184e-13	0.737114	0.0341373	0.147946	1.26715	0.000391922	0.00726733	-0.205206	0.56055	0.814007	-0.270101	0.436209	0.72884	-0.374702	0.389497	0.999992
ENSG00000121904	CSMD2	1p34.3	450.646	10.4055	531.172	361.709	524.484	459.488	454.778	388.636	489.387	328.181	243.996	477.917	258.666	378.534	594.286	855.574	605.207	519.86	503.323	237.758	842.352	836.503	839.838	862.036	846.264	312.162	5.35548	7.05771e-63	4.95981e-61	5.53574	1.07142e-13	2.95923e-12	-0.380347	0.352118	0.593648	0.217515	0.503976	0.720611	-0.140335	0.708695	0.888209	-0.217237	0.491056	0.761999	0.0450137	0.913127	0.999992
ENSG00000156103	MMP16	8q21.3	424.606	6.47867	6.01779	1.86254e-123	3.53232e-121	0.000778733	0.997879	0.999017	Membrane	Cytoplasm																	6.01779	1.86254e-123	3.53232e-121	0.000778733	0.997879	0.999017	Membrane	Cytoplasm					0.000778733	0.997879	0.999017	Membrane	Cytoplasm
ENSG00000215644	GCGR	17q25.3	419.749	3.98717	5.91083	6.27223e-26	1.74842e-24	-1.32811	0.0412698	0.255463	Membrane	Other																	5.91083	6.27223e-26	1.74842e-24	-1.32811	0.0412698	0.255463	Membrane	Other					-1.32811	0.0412698	0.255463	Membrane	Other
ENSG00000176406	RIMS2	8q22.3	415.01	7.16285	434.896	457.748	441.027	409.089	424.363	378.128	460.087	386.868	366.26	463.653	465.246	436.194	461.694	526.159	419.056	462.585	499.128	252.865	438.335	650.296	516.382	448.401	657.732	192.462	5.78511	2.38632e-143	7.00257e-141	5.82675	8.7549e-37	1.96007e-34	0.0597717	0.823453	0.91637	-0.0195652	0.925615	0.968239	-0.305653	0.198558	0.525609	-0.290426	0.160988	0.479434	-0.211229	0.592136	0.999992
ENSG00000144681	STAC	3p22.3	406.863	18.1902	665.113	494.138	377.483	485.935	363.019	366.392	459.969	374.312	304.07	383.221	616.287	379.383	397.078	793.321	575.251	456.544	413.365	246.376	716.174	889.879	779.277	732.723	896.824	295.16	4.44898	2.40921e-67	1.84536e-65	5.1077	1.56961e-18	8.32022e-17	0.365214	0.273532	0.514523	0.360204	0.205744	0.447312	-0.391979	0.204341	0.531367	-0.376485	0.176725	0.498392	-0.0305422	0.944177	0.999992
ENSG00000152910	CNTNAP4	16q23.1	356.997	4.93322	6.00195	5.47159e-35	2.03104e-33	-0.944858	0.114967	0.410589	Membrane																		6.00195	5.47159e-35	2.03104e-33	-0.944858	0.114967	0.410589	Membrane						-0.944858	0.114967	0.410589	Membrane
ENSG00000049540	ELN	7q11.23	353.79	20.6649	4.03845	9.39886e-27	2.68548e-25	-0.86297	0.0572921	0.299151	Extracellular	Membrane	This gene encodes a protein that is one of the two components of elastic fibers. The encoded protein is rich in hydrophobic amino acids such as glycine and proline, which form mobile hydrophobic regions bounded by crosslinks between lysine residues.																4.03845	9.39886e-27	2.68548e-25	-0.86297	0.0572921	0.299151	Extracellular	Membrane					-0.86297	0.0572921	0.299151	Extracellular	Membrane
ENSG00000171451	DSEL	18q22.1	350.289	15.8094	4.42413	5.2864e-44	2.45549e-42	-0.954744	0.0117677	0.137069	Other	Membrane																	4.42413	5.2864e-44	2.45549e-42	-0.954744	0.0117677	0.137069	Other	Membrane					-0.954744	0.0117677	0.137069	Other	Membrane
ENSG00000162631	NTNG1	1p13.3	324.847	9.73999	4.98949	9.46795e-45	4.49883e-43	-0.744385	0.0773641	0.344171	Membrane	Membrane																	4.98949	9.46795e-45	4.49883e-43	-0.744385	0.0773641	0.344171	Membrane	Membrane					-0.744385	0.0773641	0.344171	Membrane	Membrane
ENSG00000084636	COL16A1	1p35.2	293.937	15.1423	4.23169	3.18352e-41	1.39516e-39	-0.57476	0.100095	0.385682	Extracellular	Cytoplasm+Membrane	This gene encodes the alpha chain of type XVI collagen, a member of the FACIT collagen family (fibril-associated collagens with interrupted helices). Members of this collagen family are found in association with fibril-forming collagens such as type I and II, and serve to maintain the integrity of the extracellular matrix.																4.23169	3.18352e-41	1.39516e-39	-0.57476	0.100095	0.385682	Extracellular	Cytoplasm+Membrane					-0.57476	0.100095	0.385682	Extracellular	Cytoplasm+Membrane
ENSG00000113361	CDH6	5p13.3	287.919	6.33491	4.60517	7.85329e-21	1.78104e-19	-1.55581	0.00942105	0.126016	Membrane																		4.60517	7.85329e-21	1.78104e-19	-1.55581	0.00942105	0.126016	Membrane						-1.55581	0.00942105	0.126016	Membrane
ENSG00000112769	LAMA4	6q21	243.489	14.4263	4.02367	3.23109e-31	1.0811e-29	-0.834826	0.0388606	0.248106	Extracellular	Cytoplasm+Membrane	Laminins, a family of extracellular matrix glycoproteins, are the major noncollagenous constituent of basement membranes. They have been implicated in a wide variety of biological processes including cell adhesion, differentiation, migration, signaling, neurite outgrowth and metastasis.																4.02367	3.23109e-31	1.0811e-29	-0.834826	0.0388606	0.248106	Extracellular	Cytoplasm+Membrane					-0.834826	0.0388606	0.248106	Extracellular	Cytoplasm+Membrane
ENSG00000150394	CDH8	16q21	231.912	4.10511	5.66415	1.65649e-35	6.26668e-34	0.00194453	0.997107	0.998608	Membrane																		5.66415	1.65649e-35	6.26668e-34	0.00194453	0.997107	0.998608	Membrane						0.00194453	0.997107	0.998608	Membrane
ENSG00000188888	GPR179	17q12	228.322	8.81446	4.62731	2.42277e-34	8.86443e-33	-1.1289	0.00895292	0.122587	Membrane																		4.62731	2.42277e-34	8.86443e-33	-1.1289	0.00895292	0.122587	Membrane						-1.1289	0.00895292	0.122587	Membrane
ENSG00000084453	SLCO1A2	12p12.1	224.84	5.18811	5.22757	1.46957e-18	2.90634e-17	-1.3513	0.0556356	0.294763	Membrane	Membrane																	5.22757	1.46957e-18	2.90634e-17	-1.3513	0.0556356	0.294763	Membrane	Membrane					-1.3513	0.0556356	0.294763	Membrane	Membrane
ENSG00000143473	KCNH1	1q32.2	194.244	3.57973	5.64786	9.87507e-49	5.16716e-47	-0.604051	0.166981	0.488113	Membrane	Other																	5.64786	9.87507e-49	5.16716e-47	-0.604051	0.166981	0.488113	Membrane	Other					-0.604051	0.166981	0.488113	Membrane	Other
ENSG00000136546	SCN7A	2q24.3	191.937	4.50384	5.29309	7.94364e-35	2.93361e-33	-0.745847	0.141049	0.453357	Membrane																		5.29309	7.94364e-35	2.93361e-33	-0.745847	0.141049	0.453357	Membrane						-0.745847	0.141049	0.453357	Membrane
ENSG00000148948	LRRC4C	11p12	188.015	3.92374	5.45336	6.57251e-40	2.78482e-38	-0.863195	0.074945	0.339184	Membrane	Cytoplasm																	5.45336	6.57251e-40	2.78482e-38	-0.863195	0.074945	0.339184	Membrane	Cytoplasm					-0.863195	0.074945	0.339184	Membrane	Cytoplasm
ENSG00000151892	GFRA1	10q25.3	184.652	8.57643	4.33032	3.61766e-22	8.6948e-21	-1.105	0.0428642	0.260082	Membrane	Nucleus																	4.33032	3.61766e-22	8.6948e-21	-1.105	0.0428642	0.260082	Membrane	Nucleus					-1.105	0.0428642	0.260082	Membrane	Nucleus
ENSG00000163873	GRIK3	1p34.3	182.383	6.54852	4.68458	4.971e-26	1.39284e-24	-0.92584	0.076445	0.341954	Membrane																		4.68458	4.971e-26	1.39284e-24	-0.92584	0.076445	0.341954	Membrane						-0.92584	0.076445	0.341954	Membrane
ENSG00000215218	UBE2QL1	5p15.31	177.833	6.62751	4.72051	1.8969e-39	7.95197e-38	-0.555008	0.191253	0.518222	Nucleus	Nucleus+Membrane																	4.72051	1.8969e-39	7.95197e-38	-0.555008	0.191253	0.518222	Nucleus	Nucleus+Membrane					-0.555008	0.191253	0.518222	Nucleus	Nucleus+Membrane
ENSG00000070159	PTPN3	9q31.3	172.693	7.19552	4.49611	1.43085e-33	5.11035e-32	-1.15495	0.00818473	0.117575	Membrane																		4.49611	1.43085e-33	5.11035e-32	-1.15495	0.00818473	0.117575	Membrane						-1.15495	0.00818473	0.117575	Membrane
ENSG00000125848	FLRT3	20p12.1	161.569	2.12606	6.07535	1.91587e-53	1.10061e-51	-0.522826	0.211081	0.539317	Extracellular	Cytoplasm+Membrane	This gene encodes a member of the fibronectin leucine rich transmembrane protein (FLRT) family. FLRTs may function in cell adhesion and/or receptor signalling.																6.07535	1.91587e-53	1.10061e-51	-0.522826	0.211081	0.539317	Extracellular	Cytoplasm+Membrane					-0.522826	0.211081	0.539317	Extracellular	Cytoplasm+Membrane
ENSG00000135333	EPHA7	6q16.1	156.73	2.86428	5.61923	1.95157e-41	8.61347e-40	-0.788076	0.100435	0.386019	Membrane																		5.61923	1.95157e-41	8.61347e-40	-0.788076	0.100435	0.386019	Membrane						-0.788076	0.100435	0.386019	Membrane
ENSG00000113327	GABRG2	5q34	100.377	2.57466	5.07133	7.49289e-20	1.61577e-18	-0.867789	0.184494	0.509902	Membrane																		5.07133	7.49289e-20	1.61577e-18	-0.867789	0.184494	0.509902	Membrane						-0.867789	0.184494	0.509902	Membrane
ENSG00000170745	KCNS3	2p24.2	89.2425	1.94153	5.40391	5.61474e-45	2.6826e-43	-0.557715	0.181331	0.505846	Membrane	Cytoplasm+Membrane																	5.40391	5.61474e-45	2.6826e-43	-0.557715	0.181331	0.505846	Membrane	Cytoplasm+Membrane					-0.557715	0.181331	0.505846	Membrane	Cytoplasm+Membrane
ENSG00000081138	CDH7	18q22.1	84.4957	2.64235	4.83867	2.63849e-20	5.83746e-19	-1.14373	0.0637995	0.31405	Membrane																		4.83867	2.63849e-20	5.83746e-19	-1.14373	0.0637995	0.31405	Membrane						-1.14373	0.0637995	0.31405	Membrane
ENSG00000180525	PRR26	10p15.3	84.4792	2.58926	4.97666	6.42333e-45	3.06219e-43	-0.532966	0.167992	0.489632	Membrane	Cytoskeleton																	4.97666	6.42333e-45	3.06219e-43	-0.532966	0.167992	0.489632	Membrane	Cytoskeleton					-0.532966	0.167992	0.489632	Membrane	Cytoskeleton
ENSG00000197991	PCDH20	13q21.2	81.2505	3.07289	4.54294	3.83127e-18	7.36248e-17	-1.55336	0.0143418	0.152817	Membrane	Cytoskeleton																	4.54294	3.83127e-18	7.36248e-17	-1.55336	0.0143418	0.152817	Membrane	Cytoskeleton					-1.55336	0.0143418	0.152817	Membrane	Cytoskeleton
ENSG00000197753	LHFPL5	6p21.31	62.9676	2.41827	4.60519	2.42829e-33	8.58798e-32	-0.598431	0.124416	0.425744	Membrane																		4.60519	2.42829e-33	8.58798e-32	-0.598431	0.124416	0.425744	Membrane						-0.598431	0.124416	0.425744	Membrane
ENSG00000158816	VWA5B1	1p36.12	60.5598	3.30984	4.01378	2.13756e-10	2.17665e-09	-0.508329	0.494997	0.773878	Extracellular	Cytoplasm+Membrane																	4.01378	2.13756e-10	2.17665e-09	-0.508329	0.494997	0.773878	Extracellular	Cytoplasm+Membrane					-0.508329	0.494997	0.773878	Extracellular	Cytoplasm+Membrane
ENSG00000185149	NPY2R	4q32.1	54.6625	0.864748	5.61753	1.14086e-19	2.43357e-18	-0.513362	0.455065	0.745146	Membrane																		5.61753	1.14086e-19	2.43357e-18	-0.513362	0.455065	0.745146	Membrane						-0.513362	0.455065	0.745146	Membrane
ENSG00000160951	PTGER1	19p13.12	51.6233	3.04904	4.02027	1.31032e-19	2.7841e-18	-0.876347	0.0856843	0.360446	Membrane																		4.02027	1.31032e-19	2.7841e-18	-0.876347	0.0856843	0.360446	Membrane						-0.876347	0.0856843	0.360446	Membrane
ENSG00000148942	SLC5A12	11p14.2	50.9233	2.57006	4.09746	3.95725e-10	3.89978e-09	-1.61188	0.0337841	0.231232	Membrane																		4.09746	3.95725e-10	3.89978e-09	-1.61188	0.0337841	0.231232	Membrane						-1.61188	0.0337841	0.231232	Membrane
ENSG00000145526	CDH18	5p14.3	43.346	2.27863	4.04031	1.8089e-10	1.85766e-09	-1.2206	0.0955322	0.378166	Membrane																		4.04031	1.8089e-10	1.85766e-09	-1.2206	0.0955322	0.378166	Membrane						-1.2206	0.0955322	0.378166	Membrane
ENSG00000120322	PCDHB8	5q31.3	40.5318	0.75911	5.63366	1.3124e-31	4.43906e-30	0.00219473	0.996263	0.998359	Membrane																		5.63366	1.3124e-31	4.43906e-30	0.00219473	0.996263	0.998359	Membrane						0.00219473	0.996263	0.998359	Membrane
ENSG00000082482	KCNK2	1q41	34.0641	1.24883	4.48558	4.26995e-12	5.24406e-11	-1.05472	0.138175	0.448735	Membrane																		4.48558	4.26995e-12	5.24406e-11	-1.05472	0.138175	0.448735	Membrane						-1.05472	0.138175	0.448735	Membrane
[truncated: 47 more columns]
