# Supplementary material for: Landscape of Bone Marrow Metastasis in Human Neuroblastoma Unraveled by Transcriptomics and Deep Multiplex Imaging
Source: Cancers (Basel). 2021 Aug 26;13(17):4311. doi: 10.3390/cancers13174311 (PMC8431445; doi:10.3390/cancers13174311)
Supplement: Supplementary file 1 [file cancers-13-04311-s001.zip › cancers-1331004 - SUPPLMENTARY/Table_S7.xlsx]

## Sheet: 161217_StAnna_all_hMSC_CAFs
tissue_type	pN_FB	pN_FB	pN_FB	pN_FB	pN_FB	pN_FB	pN_FB	pN_FB	SC	SC	SC	SC	SC	SC	SC	SC	NI	NI	NC	NC	NI	NI	NC	NC	NI	NI	NC	NC	NI	NI	NC	NC	NC	NC	NC	NC	NI	NI	NI	NI	GN	GN	GN	GN	GN	GN	GN	GN	GN
RBM47	21.5143	20.3147	19.5979	20.2668	21.3213	19.9013	22.5785	19.874	20.2445	20.374	19.3623	22.0215	20.4617	20.7654	20.2159	21.0688	20.6023	20.6205	20.3912	20.1707	20.4171	20.4269	20.4292	20.2264	21.1147	21.437	20.4098	19.9603	21.1299	20.73	21.602	21.6675	21.9239	22.3712	21.7336	22.0262	21.7101	22.0947	20.944	21.0703	21.2845	21.3393	21.1908	21.2785	21.3248	22.0713	22.1251	22.2175	22.2642
UBA6	28.9267	29.4868	29.3235	28.2342	29.9878	29.2391	29.2387	27.7748	29.2126	27.5082	30.3138	29.0366	31.0249	29.1478	30.742	28.9895	25.2807	27.0912	25.5022	25.5751	25.096	25.911	24.8094	25.4669	30.1393	29.1109	28.86	28.0677	29.2551	27.6937	27.3829	29.3421	28.7554	28.252	28.1451	27.3729	29.4153	27.8238	29.4972	27.2999	29.6237	28.684	28.8019	28.6146	28.9709	29.2839	28.7462	29.2694	27.5206
ESYT2	28.7989	28.7613	29.6297	29.3677	29.5244	29.0975	28.637	28.6295	28.4496	28.6657	28.4803	28.4971	29.0705	28.4748	28.9814	28.8564	27.6995	27.6908	26.1169	26.8051	26.576	26.0537	27.1587	26.7379	28.9485	28.9781	29.1171	28.9022	29.1144	27.6591	28.9048	29.2822	28.8381	28.2796	28.2125	29.1384	29.3259	28.4613	28.6296	29.0218	29.2143	29.4243	29.5973	29.3289	29.3865	29.4949	29.5039	29.4564	29.7889
SHOT1	24.3644	26.2448	24.8973	22.534	25.4276	25.7104	25.2168	26.807	27.9496	27.0911	31.3886	28.6683	31.8151	29.9843	31.4878	27.3583	25.1286	28.832	24.5416	24.6854	28.6799	27.8638	26.3035	26.0972	27.4816	26.3703	24.937	25.5905	29.2658	27.1082	22.9224	19.7806	25.2944	25.366	25.1228	24.4542	29.7747	28.9563	29.5409	27.623	28.6187	29.3232	27.3634	27.524	28.4542	28.1969	27.3956	27.0561	28.8509
T120B	20.3466	23.2727	20.2264	20.8219	20.119	19.8711	19.1992	22.1127	22.2939	22.3638	21.8118	20.8645	20.1524	23.0458	19.9015	21.1644	20.7113	20.7302	20.3192	20.0957	20.3441	20.3543	20.356	20.1504	22.5722	22.753	21.0953	21.4605	21.9043	21.3045	21.2678	19.955	20.0718	24.2094	19.8934	20.4032	19.8842	20.5097	20.8382	20.9729	23.2551	21.2367	21.0871	21.1764	21.2235	22.5313	22.5855	22.6731	22.729
TSN11	19.9591	19.8238	21.1603	19.7998	20.2975	20.3307	19.6718	20.864	20.8541	20.9659	19.83	21.215	20.5758	20.8682	20.3319	20.9324	20.4466	20.4639	20.6012	20.3896	20.2648	20.2762	20.7576	20.448	20.4511	20.8379	21.8947	22.8391	20.7565	20.9622	21.341	19.5274	20.243	20.9378	20.0635	20.1854	19.6392	20.297	21.4641	21.5488	25.955	26.132	26.5233	26.6033	26.1271	25.6917	26.5569	26.6555	25.5839
SRCRL	21.3492	21.7651	22.7292	21.6466	21.5038	20.8958	22.6103	20.5399	21.5454	23.7573	20.4456	21.2873	24.3529	24.8598	21.5263	23.1614	20.7224	20.7414	20.2409	20.0141	20.2656	20.8589	20.6429	20.0678	21.3954	23.7257	22.6183	21.1117	23.2673	20.6888	21.5493	21.622	23.5755	20.5798	19.6464	21.9871	19.9647	22.0331	20.109	20.3019	21.5712	20.5302	22.1993	22.4815	23.2227	24.2472	23.4833	22.5452	20.5597
F92A1	19.5733	21.9479	20.1129	21.8205	19.6926	22.049	20.2939	21.4941	21.046	21.6371	22.0416	23.1316	21.7507	21.9266	20.0502	21.1741	21.506	21.5296	20.2418	20.015	20.8515	21.2884	20.2763	20.0687	20.8265	21.6905	20.7099	18.4494	20.4582	21.5649	21.7512	18.9659	19.8232	22.3331	21.6893	19.7024	21.6661	22.1619	19.5082	22.425	21.7918	22.7655	21.7007	22.9275	23.1118	22.9664	22.7397	23.053	22.0063
SYTC2	23.8532	23.9851	21.1179	24.935	20.4888	23.5091	20.7705	24.0005	26.5848	25.4148	25.8834	26.7618	25.4475	24.2099	25.9196	26.3723	26.3991	26.0297	21.2458	25.853	20.4762	21.4047	20.8653	25.6237	26.2124	25.7121	26.5652	26.2631	20.8382	24.8451	25.7999	25.501	25.0646	23.9133	24.3928	20.9456	23.4761	25.1307	25.3741	25.1524	26.1515	26.3455	25.5931	25.2863	26.4801	26.2664	26.2697	26.0494	27.4336
SMCO3	24.4661	23.7706	21.1144	21.2552	20.5541	21.3288	20.1672	21.7328	21.6337	21.1522	22.0463	23.7829	21.8812	22.5448	22.0214	22.4831	24.471	25.5925	24.0812	25.5959	23.8787	24.9662	23.4694	23.2867	25.0607	25.222	28.719	25.5258	24.6712	24.9518	24.3772	27.0847	27.0548	26.0482	25.86	22.7955	22.187	23.6529	24.55	23.5979	22.7206	22.569	22.6343	22.2413	22.5569	20.3841	20.4366	20.5462	21.1401
LAMB4	20.2523	20.8027	26.4555	27.6403	21.2799	27.6851	21.5586	27.3629	22.1979	21.6844	20.3202	25.1731	20.42	26.2658	26.9716	21.0339	20.5332	20.6755	22.3867	22.2508	20.2599	27.5717	22.4595	20.288	28.7037	21.5857	27.1887	21.188	28.4777	25.1252	26.5103	21.804	24.8888	20.2013	26.397	26.5675	20.0637	27.5663	19.976	21.82	21.7158	20.9822	21.9897	22.6983	22.7333	20.9737	21.0266	21.1153	23.2271
WDR91	24.6862	20.7616	23.7436	24.1752	24.552	24.9333	23.6844	24.5576	22.2901	21.049	23.4094	25.9131	24.8812	25.4715	25.7792	26.4277	20.6569	22.9217	21.915	20.0091	19.5587	19.5732	20.2715	21.8345	22.6277	21.3717	24.8563	20.8384	20.956	21.2374	20.5543	24.4438	23.297	22.3556	19.2054	22.0102	21.8422	20.6655	21.0186	23.8786	22.0482	24.2726	20.8294	24.0975	23.9497	24.6703	24.5663	24.3123	22.1125
XIRP2	25.6497	27.191	27.2189	27.1675	26.7954	26.6879	29.7998	25.052	21.5723	22.3601	20.796	21.086	25.3142	21.3106	20.1615	25.3481	19.9119	21.0083	20.1686	20.5308	21.2514	21.2566	27.3447	19.9914	20.5596	20.9359	22.8827	24.9267	24.8716	24.7716	24.9636	20.8107	21.9056	25.4484	20.331	21.2893	21.6921	25.0682	21.7269	25.0421	26.4611	27.3016	22.1251	23.8061	26.9976	26.1405	27.5039	27.4632	27.1932
POTEF	20.5049	20.5037	20.0793	22.5561	20.0585	20.6642	20.1359	22.0078	21.5487	21.127	21.6971	21.0606	22.4126	20.7172	20.274	21.1167	22.8898	20.7762	20.7366	19.288	21.5706	21.5742	20.7807	20.591	20.9183	21.2597	20.408	21.3922	20.9311	20.7895	20.5321	20.8677	20.7563	21.654	21.7155	21.3383	20.5591	19.9171	21.8969	21.7906	22.6003	22.646	22.5134	21.3503	21.3961	21.708	21.7615	23.1616	22.5054
TPC13	22.3759	21.2863	19.8014	21.3562	23.487	23.5845	20.7745	20.6335	21.1545	21.6632	19.0567	21.724	20.5188	20.6379	22.1925	21.0479	20.7571	20.7811	21.2142	21.0286	21.6622	21.6652	21.2666	21.095	22.369	22.5695	21.0198	21.2748	22.3997	20.2315	21.3304	20.7096	21.2421	21.7898	20.8981	20.9535	21.7314	20.8866	20.2835	20.4625	22.9387	23.4819	23.0565	22.1974	23.2033	23.6037	23.919	24.1904	22.6657
CNOT1	26.5333	29.7648	29.9276	29.4418	28.7498	28.6918	28.7964	29.1862	28.6732	28.4108	28.1076	29.2376	28.2876	27.58	28.4534	28.9629	25.8395	25.7861	21.5292	24.4646	18.6763	24.5079	25.7238	23.62	28.9243	28.0085	26.5427	23.6543	28.4535	25.824	27.1083	27.1171	28.2356	23.1648	27.466	26.256	29.3775	27.0011	26.757	26.748	28.8275	28.8016	29.4031	29.6026	29.3535	29.4278	29.2982	29.3491	28.1774
KR87P	19.0506	22.0365	20.6446	20.0996	20.6282	20.7523	20.2983	22.1086	18.8003	19.7504	18.0186	19.3685	19.7389	22.9227	17.7838	19.4133	20.9887	21.1951	20.3687	21.3569	19.3698	18.6956	21.5871	21.4274	19.9337	16.4384	20.9158	22.6469	19.9344	22.4683	19.9706	20.4204	20.9836	21.5694	20.9536	21.3386	17.5597	17.9679	21.4352	21.8442	22.1049	21.815	21.6724	22.5793	22.2364	23.0243	21.5932	21.691	24.6343
PALM3	22.2781	20.5418	21.4527	19.7061	23.5166	21.3583	19.9397	20.7211	21.1678	21.6403	20.2892	21.0762	22.8564	20.2236	19.4811	20.5655	20.8133	21.7977	20.5931	20.1473	20.8855	19.3853	20.4063	20.2027	21.6713	21.9396	20.5153	20.3435	21.6934	20.2087	19.4094	21.7295	20.6997	21.3273	21.0562	20.9009	20.881	22.079	21.785	21.1476	24.2015	24.4129	23.9574	24.0343	24.4924	24.3399	21.9748	23.6487	24.3413
PGP	24.5012	24.5529	26.8033	25.4648	26.3806	26.2715	24.3812	25.6619	26.3963	26.8637	26.7571	25.3465	26.5109	23.6063	26.9765	26.4998	20.7619	23.483	26.076	20.3812	21.2904	23.5554	20.6346	20.4394	27.1732	23.1381	20.8901	28.3057	24.3707	24.7268	23.7785	23.9773	25.306	25.9061	20.7994	24.1124	26.2071	24.9023	25.1259	25.4727	26.0461	26.3848	25.7621	26.1708	25.6877	26.4347	26.5985	26.5658	24.4687
CE051	24.4886	24.5265	26.3529	26.7749	24.4767	25.2137	26.2487	25.835	24.566	19.9309	27.4037	26.8928	26.8137	27.1199	26.0772	22.4214	21.1735	21.3478	21.6195	21.4511	20.5338	20.8928	21.679	21.5227	25.6271	23.7145	25.3262	21.987	20.8263	21.8209	20.0847	20.8681	21.9848	22.4231	20.5174	21.0637	25.8775	26.5743	24.7388	24.7127	25.8871	25.0535	26.0706	25.728	25.9123	26.2894	26.0443	25.9086	26.2644
ZN316	26.5643	25.1508	22.7496	24.472	25.0892	20.9845	24.9204	21.2987	27.4113	23.332	25.1725	26.8592	25.2056	20.9114	25.22	21.2045	27.1113	26.9882	19.358	19.0938	26.7874	26.844	24.9605	19.136	19.3139	19.8111	25.6482	19.7573	25.8799	25.1131	20.7656	25.2527	25.8072	21.2761	20.954	21.5149	21.038	24.8955	21.8965	20.9825	25.8557	25.8521	21.2732	21.7521	20.6927	26.7954	25.7402	26.6186	21.6575
SMHD1	21.8112	22.7631	21.9096	21.6127	19.4278	21.8295	21.67	23.0351	23.5086	21.5401	21.603	24.3352	22.1096	22.4673	23.8866	23.8191	24.9438	23.55	23.862	20.2908	23.8038	22.7594	22.7218	25.6071	25.7678	25.966	23.7346	23.3028	25.3409	23.7835	23.2714	22.5667	22.4086	23.3557	21.7814	22.7272	22.9639	23.9529	23.2244	21.4803	22.8342	22.1339	25.4707	24.5999	22.1587	24.8288	25.8995	26.5825	22.7833
U119B	24.7916	25.2369	27.6598	27.6029	24.1615	24.4415	20.6992	31.1956	21.4864	21.2575	29.8245	25.0317	26.2231	27.2973	29.06	21.2087	21.4639	20.174	26.307	21.4126	19.65	20.5533	25.5583	21.07	21.2079	26.1775	21.6769	20.5873	20.1952	30.178	22.1583	21.073	21.1488	26.4244	21.1539	21.7705	20.9365	21.29	20.7965	20.9346	25.0568	25.2331	20.9293	25.1952	25.2671	25.2103	25.2061	25.6267	25.2772
CC85C	20.2607	21.2615	23.8348	20.323	22.0429	20.9144	24.0888	20.5437	20.1732	21.2704	20.0951	23.1033	20.6826	21.3041	20.3806	22.0941	19.2312	21.946	21.5826	21.6923	20.2841	25.6478	21.2425	20.3588	20.8757	20.6034	19.2137	26.1564	20.6184	21.3909	26.2257	22.0501	24.0634	25.7743	22.1068	22.1824	20.6273	22.1468	20.6599	20.8088	21.0243	20.6906	26.3996	26.3312	26.1312	22.31	21.1341	26.101	21.9033
GPHRC	19.9162	21.0445	23.7211	21.3577	22.2303	22.9223	20.1911	19.5501	21.1388	20.9542	24.61	21.0248	20.6288	21.8469	20.6271	21.0351	23.7255	23.6307	21.8509	22.141	19.6212	23.405	23.0618	23.4487	24.8763	25.7481	25.2179	20.0035	21.7515	21.0827	21.8565	20.668	22.2995	26.6655	20.7588	21.4952	20.946	20.9957	20.9176	21.046	24.7659	24.1984	24.9313	24.0741	25.7574	25.1507	24.5123	25.3122	25.8674
RTL1	21.1969	19.6325	20.6404	21.1875	19.6908	20.557	20.2793	20.5268	23.1186	21.6838	19.0079	20.6225	21.0596	21.4472	20.4404	21.7237	22.6372	23.5559	19.6345	19.382	21.0767	21.2689	20.5568	19.4278	20.6094	20.9808	19.3452	22.0414	22.855	20.8356	21.4779	21.849	21.6321	22.6915	21.9106	21.3256	21.1349	21.1547	21.1571	21.2664	21.1406	21.1963	22.2544	21.1865	21.4051	21.0811	22.8329	21.3601	29.3962
SIG16	26.9102	22.7061	20.6178	21.1675	23.6882	21.2641	22.6707	21.2306	20.4048	27.2721	20.0766	23.1469	21.6867	20.729	20.3857	21.8237	29.4202	28.2089	31.907	32.4394	29.2023	29.2765	32.4358	32.3259	19.5742	20.0461	30.3386	30.3057	20.4235	19.8751	29.7163	28.6668	20.9428	32.2766	30.8262	31.9996	25.8894	27.1957	27.8928	28.0254	28.0974	22.3901	20.9122	21.0212	22.2361	22.4798	21.5241	21.5782	22.2654
CO6A6	23.9379	19.6365	20.5947	20.0442	19.7497	24.7671	19.3928	21.6058	22.6276	19.761	22.101	22.7429	20.1525	21.578	20.8237	19.7034	20.4606	20.7032	19.2874	19.3746	21.1388	19.686	20.5613	19.2703	21.4386	23.2949	21.1927	22.3836	19.1767	23.4753	20.9748	21.9931	19.399	22.1223	22.2753	19.6585	20.1978	24.5651	22.1117	25.7973	25.3276	20.6084	31.6908	32.2869	23.16	22.0572	23.2361	21.7429	26.1473
F127A	25.3432	23.8479	25.3444	25.262	24.6646	25.0555	24.2924	24.9516	25.6494	23.5665	24.6956	24.9984	25.5896	23.8289	24.9762	24.532	22.3826	22.2602	21.2264	21.0414	20.9094	20.2946	21.9144	21.1079	23.288	23.3367	20.1305	23.0723	21.4143	21.8742	22.8262	21.0501	22.102	21.5346	22.0512	21.0341	23.441	24.3173	24.0159	20.7678	24.0646	25.1143	22.7687	24.1544	25.1268	25.2591	24.3976	24.4682	26.3464
F1712	20.168	24.1323	20.3841	22.5418	19.4962	20.8024	20.3322	20.8509	24.8216	23.8839	24.2173	23.568	24.6684	24.5635	23.5147	20.6799	25.6256	25.0541	20.8291	20.6272	19.9431	21.0829	25.0318	19.3978	22.8188	20.807	20.5673	21.7263	20.429	21.5651	21.1164	20.5141	21.1244	22.6437	20.6087	21.0005	23.9989	24.4109	20.1786	20.7363	21.5785	25.1867	24.1374	24.3069	23.8422	23.3372	23.3921	25.3402	22.6963
RUXG	24.2341	22.1477	23.7662	19.4264	22.9503	23.021	20.371	23.0136	23.2104	25.4591	23.0615	20.4613	24.7617	21.9706	23.0483	21.8874	22.2322	21.6313	19.6061	19.3524	20.3099	21.1447	20.2957	20.9132	20.4169	23.0565	25.9264	24.4061	25.8641	21.1774	24.5403	24.7871	23.4814	20.7409	25.2915	21.6992	27.1897	25.0573	25.5896	25.671	25.8134	25.9774	26.2256	26.3867	26.3023	26.6157	26.4786	27.6159	25.6373
NUD19	24.1196	24.6604	24.49	25.5896	25.6412	24.9025	24.0105	24.1715	26.2304	20.3048	23.1452	23.1734	23.7512	24.448	23.2353	21.7268	20.635	20.721	21.0419	20.9129	22.3672	20.9166	19.6304	20.9778	24.5358	21.1331	19.4856	20.8057	24.8408	23.8521	22.5614	21.5104	21.0737	21.8544	20.9675	21.4502	23.3135	22.4161	20.805	20.4008	22.8744	23.654	24.431	21.0044	25.4937	21.714	26.2618	26.229	25.2711
CO6A5	20.9902	20.6245	18.6461	21.0735	21.3455	23.0551	20.2919	21.5966	21.1826	23.3995	20.3438	21.4554	21.3637	20.3468	20.1748	22.6287	21.607	20.4928	21.1032	20.677	20.4179	20.7312	21.0913	20.739	20.9777	21.6907	21.7369	22.7386	20.4783	22.5582	20.6076	20.882	21.1528	21.6894	20.5707	22.3426	21.8857	21.8449	20.2164	20.8848	21.4923	21.5457	26.5397	27.361	20.6841	21.0863	24.4716	22.454	22.5203
MYO9A	21.1817	26.1459	25.436	25.6367	25.7827	23.8978	25.7788	23.5352	25.1885	21.2423	29.5179	25.0953	25.5592	26.6165	18.5574	26.1443	20.7022	21.5155	19.9157	24.4641	23.8089	25.6842	25.9905	23.7861	25.3593	25.9565	25.109	26.9666	26.4573	26.746	20.6023	24.6388	23.0145	21.6462	24.2918	26.5194	26.1267	23.4403	27.0981	28.4764	20.5377	26.5525	20.8349	21.5692	22.3626	21.6198	21.7676	23.8058	23.7035
F195B	26.0112	26.5643	26.5703	25.1643	24.7751	25.8835	24.5834	25.2923	21.216	25.6006	26.0841	26.0514	25.2084	24.3257	25.33	25.4765	23.4275	30.8356	26.8656	21.6993	21.4989	21.9053	25.0002	21.774	19.0052	22.6571	24.0145	22.8851	24.6814	25.8203	20.6449	23.8581	24.6718	24.6512	24.3943	19.9772	24.791	24.1748	24.3358	23.7974	25.875	25.5055	25.012	21.484	25.315	25.7707	26.0366	25.6576	25.9006
NACA	30.6704	30.857	31.1383	30.6707	29.6053	29.5837	31.3615	30.4028	30.1872	27.7178	30.9621	30.5611	30.1766	30.1285	30.7248	30.5089	29.0032	29.734	27.4062	28.1682	28.7305	29.0947	26.33	28.144	26.9037	24.8541	28.1145	29.3371	30.0638	29.1935	26.808	28.1513	28.2609	25.2032	28.603	25.1078	29.6583	26.4569	29.7545	29.4758	29.0356	29.1886	29.3541	29.0747	29.0922	29.253	29.0198	29.0738	30.5258
ADAS	28.2428	28.0058	28.5142	27.7874	28.3091	27.7481	27.5033	25.5486	27.675	28.8227	29.3787	28.0805	30.0088	28.7604	29.2068	27.8035	25.7696	23.3729	22.3151	24.8814	24.2996	23.1614	19.9455	20.2273	29.0641	28.0453	25.4671	24.3311	27.2844	26.7778	25.4456	24.8198	25.895	26.5118	22.2966	25.8142	28.863	26.8633	27.8099	25.0264	26.761	26.6584	27.5122	27.094	27.1696	26.9832	27.2395	26.9674	27.4291
KIF2A	26.494	26.5672	26.4868	26.6396	26.6242	26.4382	26.2562	26.325	27.5492	25.8807	26.8182	26.487	27.157	26.7862	27.0131	26.9623	23.6089	24.3805	22.5673	26.0841	18.9789	21.6798	25.4977	22.7007	27.5425	28.1602	28.61	26.7405	28.673	28.1291	28.0527	28.1095	28.209	28.0138	28.2729	28.0767	28.1686	28.0431	27.8703	27.9671	29.1364	29.1647	28.4203	28.8376	28.7413	29.0794	29.1077	29.1155	29.2464
PDLI1	29.4155	29.2991	31.3542	30.446	31.1583	30.4117	31.4016	30.5918	27.0766	26.4112	22.4744	23.7436	27.6085	26.3004	27.457	27.9681	24.9765	23.5222	24.0034	24.7308	24.0947	23.8887	25.0271	24.4203	20.2604	23.8091	28.0041	28.593	26.7905	25.4501	25.283	27.819	26.2777	26.1366	24.1183	25.774	24.8838	24.1717	26.8251	25.1174	29.7224	29.5635	30.6406	30.8683	29.2534	29.1291	30.2671	30.2434	29.5678
MYO1F	20.4686	21.3269	19.42	20.2081	20.3098	19.1584	20.5851	22.1394	19.5675	21.2848	20.5234	21.7471	22.168	20.8596	21.9504	21.7817	20.4957	21.0387	21.9741	22.6508	21.6137	22.8256	22.3867	19.3666	19.9882	22.2478	22.5072	20.5683	20.0187	19.3472	21.4494	22.0352	21.1174	22.679	21.9499	21.345	21.8634	21.4348	20.4921	21.4141	25.0864	26.1227	26.5777	26.486	27.089	26.2795	27.7071	26.6836	24.9629
SNP23	28.5455	28.4336	29.0475	28.1711	28.5106	28.3995	27.7715	27.9668	27.9583	28.3055	28.7243	28.2211	29.0617	27.2399	28.6568	27.09	28.124	27.6136	26.112	26.2571	25.198	24.5541	27.184	20.8077	24.1575	24.7248	28.0929	26.6225	28.3953	26.0609	27.4654	28.2199	27.4768	27.5091	26.4045	26.1115	27.4176	27.0649	27.154	27.1559	27.5751	28.3166	28.559	28.4099	27.8051	27.8114	27.9681	28.0322	27.1941
AIP	29.6691	29.3703	28.8013	28.8598	28.9427	28.6581	28.9034	29.4261	28.0301	28.5245	29.8429	29.6797	30.0178	29.9174	29.6232	29.4683	26.0485	27.6388	27.8052	27.8747	25.9305	25.2911	26.771	28.3642	28.4678	28.9452	28.8197	27.7985	28.457	27.6562	28.4624	28.6179	29.4598	28.299	28.6725	28.4572	28.9345	28.0612	28.7953	28.7605	29.3328	28.9795	28.9793	29.2522	29.1334	29.5063	29.0242	29.2785	28.5406
GTPB1	24.0011	24.9205	26.7367	24.738	27.0993	26.5203	27.2965	25.4836	24.8981	24.4529	24.8998	24.7033	25.8998	26.4597	23.2351	25.151	20.3412	19.493	24.4165	24.2148	20.995	19.6056	23.8912	21.1352	25.9312	23.8489	25.3161	22.5962	25.0106	26.2292	23.8744	22.665	25.0849	25.0876	24.1624	20.3903	26.2723	25.1608	25.3481	25.3103	25.7888	25.1543	26.0658	26.0875	25.7855	25.3175	26.0057	25.5399	25.2114
LEG9	22.0299	19.8305	19.656	28.3174	20.0137	28.0231	20.3011	19.1344	21.3919	21.7599	18.5531	24.4031	20.6788	22.3256	20.4366	23.1981	21.018	20.126	20.942	19.3216	20.0101	24.285	22.0402	18.7291	20.7272	19.5324	22.0336	20.4168	20.7377	20.2593	21.7143	19.2529	19.5537	20.35	20.3889	21.184	20.872	21.093	22.2472	20.4698	26.7575	26.5976	26.924	27.2368	25.3134	25.702	26.965	26.7655	26.7459
SMAP	27.3535	26.6129	28.0253	27.7416	26.5244	26.1469	26.2326	28.7237	23.7503	28.3656	28.8057	26.9532	28.2766	28.4556	28.1029	28.489	19.4814	26.757	25.3134	21.2832	25.8552	21.5028	26.9008	21.6235	24.221	24.1469	26.6659	25.8255	26.9641	27.384	26.7226	26.2907	25.8287	20.3773	26.6014	26.0174	26.2306	27.7496	27.1062	27.0727	19.9873	20.9014	27.2426	27.0777	20.9775	25.5117	21.535	21.8636	21.3673
AP3B1	29.2762	28.9652	29.5349	29.1766	29.1529	27.2991	29.0327	29.2587	28.8303	29.1689	27.374	28.5386	29.0547	26.533	29.2369	28.885	27.5419	28.4639	25.8996	25.4728	27.5722	25.8335	24.143	26.0456	28.2273	25.8645	27.3944	25.2604	27.4551	28.857	26.2644	26.0871	25.5821	25.8515	25.4062	26.4553	29.381	28.5018	28.6522	27.6228	28.4114	28.2401	28.3709	27.626	28.4404	28.5399	28.5332	28.5747	27.7635
APBB1	22.7453	22.4826	23.0165	22.9646	22.6511	21.8381	22.6362	22.3155	22.372	23.6736	23.1319	23.285	22.5281	22.3927	21.2851	23.988	20.6305	19.7408	18.9724	18.6919	20.321	18.9965	19.6004	19.3335	20.0111	20.9169	18.8911	21.2007	20.1749	21.1534	20.6316	20.2887	20.5705	21.7864	20.9612	20.3435	24.1496	22.8552	21.4596	21.6285	23.3689	23.4814	23.1616	23.134	22.7027	23.3439	22.6481	22.944	22.2893
LEG8	25.3359	25.5517	22.8951	24.7266	23.7801	24.3935	23.8834	25.3393	26.1444	25.8087	24.8982	24.0618	25.2375	25.2737	25.6287	25.0941	26.1131	26.685	26.1209	23.0594	26.4437	26.3295	25.4652	25.2858	25.514	26.5106	26.1713	26.3017	26.4182	24.0934	21.1321	25.8391	25.9033	26.3899	25.8345	25.9907	25.6347	25.813	25.7096	25.9595	22.5557	25.2437	22.4686	25.3184	20.6286	21.8837	20.8199	22.2186	26.2971
NDUS8	25.5071	26.4491	26.3296	26.098	26.3149	25.7635	25.9109	26.4037	25.9766	24.104	27.3597	27.8199	27.204	25.7213	24.4526	27.3171	25.8337	25.9329	24.9205	21.5506	23.8579	23.2208	23.6017	25.8161	26.1574	25.8201	25.5709	23.5804	26.6256	26.1398	25.7043	26.2438	26.0025	19.4456	26.2194	25.9719	25.6219	25.5163	26.1505	21.5183	27.5091	27.3383	27.1816	27.001	26.9522	26.3427	27.3477	27.2166	28.0318
IKBE	24.9908	20.6693	19.4584	21.1613	20.735	20.9024	24.3622	25.3895	29.9056	21.3172	24.1964	25.361	20.4959	21.3109	28.2229	26.7823	20.8935	22.957	23.1625	21.4012	20.3978	21.7615	20.9896	20.8281	21.3	21.0872	19.9483	21.2711	20.0128	20.945	21.0623	21.5621	21.8205	21.2171	20.6791	21.3236	21.3422	25.2359	20.5424	21.0357	21.8791	24.7624	21.7885	25.5759	25.7113	23.7933	25.8158	24.151	21.542
PSD11	31.0796	31.1101	31.0019	30.4231	30.9085	30.7409	29.9694	30.1004	31.1827	28.9129	30.2152	29.9067	30.6236	29.0877	30.8844	30.3941	28.1812	29.6793	27.5742	28.0619	30.1323	29.7396	28.0607	28.154	30.3898	30.8658	30.0493	29.2885	30.7309	30.9726	27.8549	29.8418	29.736	28.2914	29.2671	28.9793	30.4052	29.2164	30.5067	29.0471	29.9151	29.907	29.9762	29.8033	30.0623	29.7996	29.9771	29.8289	30.0911
PSD12	29.2775	29.3034	29.662	29.4252	29.5685	29.2527	29.0057	28.6204	29.9836	29.4352	29.6934	29.4199	29.7114	29.6032	29.2629	29.3909	25.4115	27.194	27.3887	24.7036	24.2542	26.0061	24.5695	24.2185	29.2687	28.217	27.4225	26.2517	28.5943	27.1518	27.346	28.0215	27.3205	25.4894	27.1506	24.1401	28.9894	27.9001	29.0314	28.3912	28.7655	28.981	28.972	29.105	28.8199	29.3349	29.2029	29.1445	28.8264
PSMD9	27.0782	26.7256	26.2971	25.5861	27.7785	27.6123	27.8616	28.109	25.9247	27.9209	28.6814	28.3566	28.0638	28.2228	28.0265	28.0596	19.7277	21.9097	21.715	19.2888	20.5184	21.617	21.5151	24.4264	25.4364	24.0258	19.9182	20.4612	27.3652	26.7786	25.5249	20.8755	26.8928	26.1993	27.0904	27.2272	21.6588	22.0501	26.9165	26.4772	27.1926	27.9372	27.889	27.7385	26.9715	27.0762	26.4962	26.5936	27.0687
ATOX1	28.6398	28.963	29.5227	25.8447	29.8841	29.7227	29.3505	25.7733	30.0276	29.5035	31.1463	28.5172	31.6327	29.6503	30.6206	28.7597	24.8693	21.2999	27.8254	20.765	29.0466	29.0904	27.6318	27.5328	20.9144	20.5852	24.9942	24.5104	29.4216	28.0467	27.0041	25.5877	26.9135	24.0326	27.2497	23.5496	28.932	26.4267	29.3928	26.1266	29.0761	29.2279	27.6463	28.5607	29.4543	29.4474	29.3062	29.4676	27.6335
SPT5H	27.4082	25.552	26.9171	25.4399	26.9413	25.105	22.7557	25.2256	27.3171	26.7083	26.7066	26.5146	27.7246	27.3057	27.2082	24.9157	24.3846	22.9823	20.9613	22.8575	23.1764	20.8683	25.1574	25.3382	26.1914	24.8027	24.2716	21.5116	27.2438	24.9306	25.7012	24.9185	24.6327	26.4806	21.338	26.29	27.0001	27.3669	26.1434	25.4647	25.0281	25.6259	27.0897	27.2357	27.1236	27.2987	26.3858	27.6172	26.1374
DFFA	26.8469	27.9652	28.2639	27.3558	28.5342	26.9318	27.1377	27.3401	26.8291	26.6339	27.0841	27.3103	28.4486	26.8515	27.6232	27.2559	25.9507	25.5484	23.0489	23.993	26.4815	25.6541	23.3449	25.2366	21.9328	23.9224	28.4237	27.6617	26.0067	27.7786	26.1681	27.6286	24.6517	26.2066	21.8749	22.4948	26.5362	24.5807	27.1348	22.2985	26.7447	26.1522	26.8341	26.1236	26.5537	27.4788	25.5469	27.4684	26.8846
CLIC1	32.2846	32.1156	32.0178	30.1002	31.5903	30.8874	31.9219	30.5896	31.785	31.6613	31.6138	30.8987	31.6268	31.2498	31.8996	30.233	29.287	29.7589	28.8815	28.7524	30.007	30.2482	28.7531	29.2618	30.2863	30.7437	30.1044	29.6708	30.4599	27.5436	29.284	30.4199	30.4293	30.3115	29.2032	26.9088	30.9092	30.7118	30.5265	31.0872	31.2143	31.2248	31.4066	31.4166	31.2479	31.3518	30.9205	30.9088	31.4475
EIF3F	29.0507	29.1067	29.1146	28.2124	28.9384	27.0814	28.1679	28.4043	26.8034	27.8354	28.7111	27.7779	28.1801	27.5809	29.3581	28.3016	26.8689	26.6013	25.9081	25.9704	26.2986	27.2536	26.1703	26.1541	28.1739	28.0178	28.2909	25.8029	30.4314	29.1933	25.1239	21.2618	26.9147	25.1884	27.1306	20.582	28.6807	27.4401	29.0477	28.865	27	26.4004	27.0233	27.4878	27.5805	27.272	28.0953	27.2822	28.1808
ODPX	26.4788	26.0305	26.4658	26.2118	26.512	26.2309	25.4189	25.7945	26.7225	27.2261	26.8159	26.8995	26.8967	26.6342	26.1876	25.6198	25.9294	25.2468	24.8931	25.1199	25.063	25.6464	25.7692	25.4793	26.5248	21.4251	28.1424	26.3753	27.2841	24.2675	23.9288	26.8964	26.0321	21.5516	21.9756	23.2291	26.8523	25.4599	27.1909	24.6678	27.3376	28.0392	25.2807	26.3852	28.6228	28.5672	28.2164	28.0395	29.8661
MATN2	19.5361	19.5967	23.1475	24.9411	23.5034	20.5739	21.9482	21.2851	25.5686	24.1323	24.6892	25.5098	30.0164	26.8741	26.7152	25.4711	31.3202	30.6337	30.8665	31.4529	30.0747	31.331	31.6637	30.4998	30.7618	26.5802	31.64	29.8217	30.5198	28.9055	28.2575	31.2379	32.414	31.1814	31.3742	30.1024	29.4442	27.351	29.0934	25.6552	32.2961	32.1564	32.7365	32.5397	32.4744	32.457	32.4433	32.4749	32.5861
QSOX1	22.9877	24.5011	25.0028	24.3986	23.4702	23.1108	23.7494	23.2159	24.3462	23.064	21.1944	19.9321	22.1488	20.6649	23.7543	23.0713	22.825	20.906	20.201	21.7621	22.2098	20.3313	23.078	20.2064	22.0289	22.4921	22.5662	23.5168	21.5768	22.9414	19.726	20.0399	20.9627	22.0087	20.937	20.819	20.9151	22.9707	22.2597	22.4087	25.6543	25.5363	23.5843	21.8663	24.6523	23.9051	24.7193	25.341	25.8621
DCTN6	25.5985	25.2581	25.2206	24.702	24.8458	24.7138	24.3523	24.3325	24.9381	26.3988	25.6116	25.3758	25.6531	25.4468	24.2679	25.7664	21.5125	21.6115	20.2924	20.1509	21.2169	20.4077	21.6303	20.3319	21.5881	20.5578	24.7758	22.5404	22.2308	21.1186	21.1754	19.7113	21.5257	22.0316	24.5836	22.6168	24.9468	25.1879	24.9093	22.2335	26.0535	26.1105	25.7488	25.88	26.2316	22.2734	26.076	26.0393	25.7229
ACATN	23.1022	23.2496	28.4126	29.6251	29.2862	28.8522	29.5959	25.4634	22.0739	29.2678	28.7725	28.9242	29.4228	21.0216	30.3427	28.8082	28.4995	28.4317	27.9602	27.8438	29.6579	27.8332	26.2749	28.4	26.8383	25.6828	21.289	21.5778	28.7962	27.5699	21.5069	20.8506	20.3263	21.0088	20.3332	20.3595	19.3735	26.8145	20.9064	22.6974	27.7432	28.1132	28.0954	27.7555	27.9066	27.9796	28.0372	28.3099	29.274
IPO5	32.5112	32.4125	33.1427	33.1278	32.6575	32.2992	32.4568	31.957	31.3549	30.3673	31.4642	31.5636	31.43	30.5522	31.5649	30.1919	30.0333	30.5724	27.7938	27.1946	28.2701	28.737	27.4644	28.6033	31.6578	31.6263	30.8758	30.3823	31.3983	29.9283	29.8557	30.4148	30.5097	29.5851	30.6409	29.0869	31.3286	31.5455	31.0591	29.9609	30.8254	30.8071	30.45	30.4311	30.9945	30.9649	30.8009	30.9553	30.8764
DNM1L	30.1751	29.9758	30.1823	29.8119	30.0407	29.5853	29.7307	28.7732	30.3082	30.1421	29.5159	29.6274	29.4535	28.7708	29.5421	29.494	27.6066	28.037	26.6225	26.1777	27.6873	24.7077	27.9998	27.0298	29.5231	29.5208	29.9302	27.6371	29.8639	29.688	29.0594	29.2996	29.4767	29.6286	28.8409	28.2261	29.6211	27.9005	29.5322	28.8793	30.1398	30.469	29.9225	30.0002	30.2171	30.1076	30.3559	30.3548	30.2551
GFRA2	20.8023	22.0432	21.399	21.8573	19.4122	20.3069	21.3789	21.8453	24.0992	23.7008	24.5902	24.9304	23.2507	20.7666	24.0974	23.5559	20.7603	21.4022	22.1597	22.0142	21.8304	22.1061	20.3328	22.0929	23.1921	20.6795	24.7851	24.3795	20.2806	21.4429	24.1319	23.8552	24.2429	25.0561	23.277	23.0479	19.405	20.0937	22.0965	20.3833	27.4525	26.8485	27.4348	26.9146	26.7722	26.6039	26.6486	26.5875	23.0915
GOLI4	27.7197	28.1319	26.808	26.4121	27.1358	26.316	27.0974	27.316	24.0772	24.4816	25.5436	25.5819	27.0816	26.4907	25.7701	25.7407	26.3566	20.8348	21.4055	21.228	21.4509	22.8551	27.2242	21.2968	26.9512	24.5754	23.5964	21.5723	25.8711	26.112	21.2633	23.5831	25.6902	24.5153	22.9229	20.3299	26.2164	27.3171	26.8457	22.5539	24.1353	24.8128	25.7909	26.0757	25.7311	25.205	24.3956	26.9308	25.0723
MANBA	23.8402	23.6172	24.2212	24.4707	27.4727	25.8512	23.9988	22.8685	25.3337	25.9197	25.7329	25.5925	25.3318	25.1736	26.6024	26.0065	21.4548	22.8465	22.3022	22.9831	23.4345	20.2412	21.9967	22.3129	24.6189	24.1875	22.0839	24.4334	20.9594	22.9308	20.5461	21.4536	20.5463	21.2276	24.0107	22.2205	20.9437	22.8835	23.0548	21.3952	23.6423	23.9936	22.8617	22.9082	23.4605	24.2428	24.1143	23.9664	23.5064
AGRIN	21.6771	19.5388	21.9398	22.0075	22.9985	21.9522	21.8535	20.4444	21.5439	22.3393	25.947	23.8216	23.233	23.3321	21.8337	23.208	28.56	27.6647	27.5085	29.2025	27.5437	27.3096	29.4171	28.302	26.8421	24.9256	29.8767	28.662	27.8522	26.2836	28.4501	30.0899	30.9607	28.6799	30.8942	27.5544	29.6349	27.6156	29.6491	28.3961	31.4452	31.9601	32.3021	32.4744	32.1603	32.0559	31.9949	31.8007	29.1996
EXOC5	27.2816	26.1604	27.035	26.1441	26.6886	25.1433	25.6639	25.1308	27.0161	27.3564	25.7866	26.9342	26.4063	25.8219	24.6809	26.7132	25.4012	25.046	25.5687	23.2411	24.6844	24.8939	24.6036	24.8918	27.0586	26.8104	25.4324	26.3673	26.5271	26.4513	26.4087	24.4219	26.1485	26.2218	26.1232	26.363	27.8134	27.6072	26.0804	26.5793	26.1371	26.9469	27.0788	27.6028	27.313	26.9995	26.7216	26.614	26.4766
BT3A3	24.8233	20.673	23.8289	24.612	23.5224	24.2964	24.0228	24.5372	19.799	24.8296	24.2055	25.0038	25.76	25.0797	25.2866	25.2201	19.9598	20.4853	22.0903	21.9418	19.9977	22.1399	22.1239	21.6978	20.6315	25.9417	25.6763	23.6066	23.9381	23.8384	23.8667	25.2397	25.2829	25.3292	25.9725	25.2708	24.9489	24.3529	24.6566	23.386	27.0484	26.8528	28.1766	27.5809	27.4444	26.954	26.9309	21.4368	27.9468
PSDE	29.0533	28.0124	28.7531	28.2683	28.5786	28.3805	28.3718	28.685	24.3713	25.4686	29.1028	26.3839	28.889	26.8909	28.2658	26.5205	28.1051	26.7699	21.6448	21.624	27.1042	27.5293	21.2321	18.9122	27.6283	27.8422	27.855	26.4107	28.5486	29.4885	26.898	26.9024	27.9299	27.1267	26.9762	25.3519	28.6339	28.1262	28.4551	27.4257	27.0106	27.6582	27.8924	26.5535	27.9097	27.753	27.3256	26.4327	28.3574
STK25	21.7377	21.1749	24.5203	23.3027	24.7944	24.1001	23.8076	24.3487	21.7006	22.1261	23.8112	24.0413	23.7067	21.0049	23.5134	21.3987	22.3617	21.0774	21.7854	18.8727	19.8214	21.8325	21.4612	19.1273	25.79	22.6136	20.5905	21.0152	22.7308	22.9834	21.9058	20.5422	20.6192	20.7492	20.6362	22.883	22.7993	20.4044	20.7527	23.7606	20.9545	24.3001	23.0332	21.5132	22.7005	22.4694	22.2943	22.2016	22.993
CHL1	19.8009	21.153	17.4431	20.6179	24.0752	21.7314	19.915	21.8762	25.0378	25.4559	25.6417	25.1348	28.1408	26.7844	28.1173	26.7012	25.3946	23.9035	27.2282	27.8707	21.8563	21.4853	25.3162	26.3372	25.1673	23.444	30.4439	28.8229	26.3327	25.1025	27.6905	30.1426	30.959	28.3864	30.7933	27.4187	30.3427	26.8763	30.4911	28.6521	31.0041	31.4257	28.9749	29.5042	32.1211	31.8977	31.2428	31.0774	29.9245
VMA5A	24.2096	23.7809	23.7484	23.3425	23.8103	24.583	24.5457	22.4467	25.643	25.4391	24.8861	25.135	25.3345	25.3924	24.8439	23.8621	26.3993	26.7922	24.7439	25.7034	24.0394	20.8713	24.1688	26.3033	20.3519	24.3742	22.7676	22.7487	26.0727	24.7585	24.5374	26.5079	19.3962	23.7588	21.9911	22.9113	22.9429	22.6127	25.9893	23.2814	27.5479	27.7507	26.7489	27.6397	27.8029	27.7699	28.0318	27.9437	27.1525
PESC	21.2696	22.3799	22.6382	24.6972	22.0806	23.0264	20.1466	23.303	23.821	24.7219	22.4914	23.3982	24.0255	24.3419	23.4778	23.5429	21.0565	24.9819	21.4111	19.7395	20.7617	21.4551	21.8478	22.0654	24.423	25.0287	24.5656	23.2856	25.402	25.2668	23.8374	26.1011	23.41	21.7838	21.4525	21.4508	24.908	25.0535	24.7249	25.2393	22.5071	25.5707	24.3072	25.0146	25.6647	25.7476	25.9809	26.2186	21.6183
SDCB1	26.7899	28.3865	28.4455	26.3105	28.1715	28.103	27.9041	26.5578	27.0028	26.0689	28.1869	27.741	28.2154	27.049	27.9057	26.8214	24.0007	23.576	22.4721	22.4958	20.3399	26.7612	23.6111	23.139	26.6084	25.9223	27.2575	27.4057	27.8365	26.6984	24.5042	26.7674	26.4695	26.4233	24.7485	21.8636	27.5085	24.8604	24.6035	23.9286	27.5208	27.6855	27.3935	27.0514	27.1661	27.7247	27.5856	27.5367	27.5184
PITM1	24.0776	25.7419	24.7616	24.6364	23.0182	25.4384	26.1023	25.1077	26.0337	26.2415	25.8006	26.1928	26.3427	26.3	26.4633	25.951	24.2849	24.1387	19.3498	21.9871	24.4651	25.9238	25.275	19.6062	27.1287	27.0904	25.3466	24.1911	25.7843	24.5961	24.702	23.9411	24.5557	25.7147	24.3174	24.6639	26.5557	24.7313	24.2291	24.8846	26.6178	27.1773	25.3252	25.4385	26.3702	26.2481	24.8225	25.5992	26.9087
NOP56	23.5237	20.0374	19.2936	20.1205	21.5279	21.5967	22.2875	19.699	21.2798	23.1396	23.821	25.3803	24.8475	24.1335	21.2822	24.8226	24.8659	24.5945	23.8809	21.9089	25.1291	25.008	24.5869	21.8568	28.119	27.097	25.3347	25.5013	27.8014	26.5787	25.27	25.0408	23.9724	23.0579	23.4174	23.7508	26.8982	26.5543	25.4049	24.7051	27.116	26.1552	28.4237	28.217	28.0936	27.5047	29.1826	28.0246	27.7774
DDX3X	30.544	30.6517	29.9181	29.7643	29.6944	29.4304	29.5392	29.1878	29.4354	29.0111	29.3141	29.5465	29.2278	28.4914	28.9281	29.0163	27.5289	27.2965	24.0225	25.0861	28.1795	28.0524	26.394	26.1448	30.2602	30.005	29.1105	29.4087	29.636	28.1342	27.9951	28.5357	27.3238	24.9591	27.3347	26.8453	29.7952	29.3275	30.0129	29.6367	29.2154	29.4768	29.2806	29.4382	29.8554	29.713	29.6781	29.0614	30.1279
RNT2	24.1181	25.2441	20.2753	22.3475	26.6444	21.4552	21.0751	21.5706	21.2125	21.882	19.6731	25.571	20.8968	19.9406	19.938	20.84	23.7136	22.6038	23.0717	22.5903	20.7251	18.8085	21.9159	19.3622	21.2328	20.9687	20.4728	20.3473	20.0455	20.7517	21.2484	21.9315	21.6409	21.4293	19.8103	22.3271	21.3175	20.497	22.5564	19.964	25.578	25.6347	25.5433	25.5628	25.3531	25.5246	26.3518	26.4155	25.6782
PODXL	20.4131	21.4146	22.5706	21.4355	20.5154	21.4249	22.1727	22.2404	24.3752	24.7413	19.8041	22.5333	20.463	22.9558	20.6582	23.3556	21.5889	18.9474	24.831	19.5582	21.1577	22.1836	23.0683	20.9618	20.4773	21.647	26.1004	20.49	24.0333	25.2755	26.2826	24.7231	25.1719	26.0245	23.9793	20.3284	20.1351	21.2721	21.2971	19.5458	22.8574	26.2763	26.8656	27.0346	25.6605	27.0724	26.5297	26.7797	22.9651
CYR61	24.7343	27.1231	27.0872	26.8631	25.289	25.483	27.8458	26.6648	21.1712	25.6351	21.2187	24.3316	25.2859	25.473	22.8966	22.7366	20.5938	21.3834	19.9774	19.3172	23.9508	19.8345	19.4948	20.5852	24.6688	24.8514	20.2983	21.0989	20.6048	20.5968	22.9335	23.8095	20.9015	23.464	21.9539	19.6209	19.8171	21.7539	21.0787	20.9223	24.5685	26.0635	25.2194	22.4977	19.8059	24.9023	21.5268	21.8106	24.5624
PPP6	28.1987	28.2838	26.7223	26.1977	27.3891	26.1015	26.7393	26.0772	22.6874	28.1255	27.2731	26.0536	28.0952	27.6986	26.9215	26.0894	21.3606	19.972	19.5724	20.0914	20.4624	20.7696	24.1784	23.3275	26.9132	23.7987	26.5879	25.1788	27.5448	27.4466	25.1401	23.4037	24.7641	24.7302	24.9872	23.978	27.6769	26.3252	26.9095	25.898	27.739	27.7967	27.8083	27.8696	27.78	27.4656	28.0327	28.0429	27.7049
NDKM	20.7092	24.9644	19.343	21.9474	24.0138	24.5008	22.0213	23.961	21.7068	19.8442	20.5193	24.5962	24.3323	24.0834	19.023	21.7658	20.5818	22.1545	21.088	21.1256	21.5227	19.0848	19.3697	20.5471	21.8351	20.7483	18.9316	21.1069	21.9533	20.7131	21.5337	19.6954	22.7425	22.5922	21.4811	20.0198	19.6872	21.4085	19.7418	20.252	21.4159	20.6159	22.4706	20.5584	23.0166	21.5313	21.0489	21.6252	21.8546
EST2	21.4221	21.8203	24.8299	25.0272	24.2248	24.9493	25.1651	24.5305	25.4941	25.4956	20.4699	21.1488	25.1823	25.4817	22.6764	25.6306	19.8653	20.4917	20.7312	23.0818	25.27	24.3543	20.0082	20.9975	25.5807	25.7693	25.2937	25.3273	22.2089	25.2531	25.5442	25.4093	25.0861	22.1299	25.5138	25.5695	25.7979	24.9351	25.3019	25.6585	21.4637	21.9813	22.7718	22.6609	21.2487	23.848	24.1831	22.9282	21.9754
MA2B1	27.4092	27.828	28.7724	27.3432	28.8932	28.2978	27.9332	26.6878	30.0818	28.5622	29.4639	27.8833	30.2014	28.5923	31.1209	28.7071	25.5056	22.8099	23.2131	20.4875	27.0974	27.6691	18.7959	20.811	26.1782	26.6455	19.8796	20.3582	28.6596	29.2689	22.8606	21.8933	25.1279	24.0063	21.6593	19.1271	28.3945	26.0541	28.6974	28.5831	26.7594	27.2837	26.9924	26.9956	27.2137	27.1423	27.6129	28.0301	25.2461
LPP1	21.323	21.6815	24.0633	25.0081	25.6922	24.993	27.2066	27.1748	21.141	24.4778	28.1828	25.0467	26.2703	24.9477	26.1631	26.8315	22.6423	20.9137	21.3073	21.933	20.4772	21.3504	25.7474	21.1603	26.5898	26.3793	27.0521	26.8844	26.4824	26.1521	21.2935	25.986	27.2953	27.1508	27.1942	27.1758	26.0291	25.9832	26.2223	27.0029	20.1117	22.9013	21.3709	22.8335	21.9588	22.5852	21.1912	21.2931	20.9616
ARI1A	22.2773	19.085	21.46	20.525	21.2119	20.7389	18.54	20.8863	21.5581	22.8269	18.71	22.542	20.4911	24.3275	19.6927	20.6381	26.2285	20.4766	20.6951	21.0353	25.913	20.7332	19.5961	23.4266	23.2236	25.7176	20.9856	21.7777	23.5463	25.5881	21.1626	21.4085	26.2842	25.3061	21.9158	21.6842	20.0853	22.0817	22.0468	22.5977	25.0519	23.0026	25.2458	25.1372	24.0292	23.8549	24.8039	25.7077	25.4469
C2C2L	20.8656	21.1761	19.4996	20.6077	22.5148	21.0146	22.6346	21.4209	23.4174	21.2444	21.1101	21.8257	22.8331	22.8616	22.7969	23.3127	20.4742	22.1632	22.0818	21.3077	21.2523	20.9853	19.0748	20.289	22.7127	19.5673	21.4164	23.679	19.0336	20.8676	22.0971	22.6964	23.5142	23.0693	21.5492	21.3166	22.6562	20.9158	23.2765	22.1006	26.3056	24.5048	24.4435	24.2353	25.1031	25.0706	24.6411	25.5655	26.9512
TXND9	27.9169	28.3755	27.1066	26.9572	27.042	26.674	26.244	27.1104	26.6309	26.2878	24.8882	26.6955	26.7715	26.6777	25.8796	26.5492	22.8617	22.8186	22.7921	22.0554	21.3782	22.1313	20.3518	20.6965	23.1003	23.7742	25.0888	22.4648	26.0947	25.5521	25.2218	25.6897	24.4117	21.827	24.0496	22.3381	26.6043	26.5634	26.2489	26.0101	25.7881	25.5574	25.4767	24.9972	25.84	25.565	25.1715	25.3413	27.0574
DPYL4	23.4138	23.5907	24.2345	24.5519	25.1546	23.4472	24.3664	24.9564	22.9728	23.0365	21.7824	21.4692	23.6081	23.9767	24.7125	21.9078	25.9236	25.3037	25.6322	25.0736	24.4344	24.2417	25.4342	26.3706	23.7249	24.0749	23.3648	25.5511	22.9489	21.1767	24.36	24.8264	25.2152	25.6589	25.9552	24.3211	23.9017	24.7132	20.7828	22.4107	29.918	30.1842	29.0831	28.957	29.6174	29.2082	29.4845	29.7853	30.1467
ACPM	24.8011	25.3315	25.5116	22.8608	26.0097	25.2968	24.6991	23.2194	22.5706	22.5159	25.6071	23.9694	26.1081	24.3243	25.068	24.5484	23.561	23.078	21.4819	20.6351	21.7536	18.4681	23.3789	21.096	20.7324	20.8318	28.8513	26.0492	27.6775	24.7055	23.1719	26.0074	25.6362	25.2975	23.0819	22.4678	29.4432	25.6517	25.2058	25.8103	26.6524	26.8802	26.5191	26.5416	27.8972	26.0069	25.4516	27.4572	27.4213
UBFD1	27.209	26.9991	27.7731	27.0802	27.9719	24.6699	29.3842	25.8808	27.7018	24.8649	25.7738	26.5323	26.9607	26.4381	26.5074	26.8265	27.1572	25.4046	18.4483	20.6459	25.7047	26.2208	26.9104	21.2271	24.343	26.1418	20.6958	26.498	27.2517	26.6851	22.0049	26.2589	21.2672	23.2324	26.6471	25.2142	24.0641	27.3931	25.4406	27.5715	28.6224	25.8083	26.626	27.2968	26.9123	27.6052	27.2444	27.4071	27.294
DC1I1	21.2438	22.7169	20.5245	20.6669	20.8372	21.2189	19.8548	20.2343	20.8578	21.5398	20.4338	23.687	22.8931	21.6238	20.5258	22.7254	21.7932	20.3251	20.325	20.6215	19.9156	25.462	20.7384	19.7672	24.1003	24.7931	25.2539	25.7609	21.0236	25.1741	24.7674	25.7164	26.6688	25.5052	27.3465	27.1163	24.9366	24.2165	19.7908	25.1486	28.7185	28.0292	27.0601	27.1797	27.3705	27.3099	25.7587	26.1073	28.2553
CTRO	21.1588	24.6452	22.3427	24.7943	23.4359	24.1611	23.5943	24.4324	23.7295	23.824	22.2975	25.4634	22.2194	24.5724	19.2852	24.6252	26.1315	24.6148	24.0755	25.5188	24.0212	22.5807	26.3732	25.3191	20.8007	23.4764	24.7106	26.3477	22.4915	20.6825	24.4505	23.9212	25.2841	24.7626	23.3861	22.6651	22.7432	22.8536	23.8718	24.8215	26.0788	26.5468	24.1762	21.4084	21.999	20.7026	22.6178	21.6825	21.3255
COPE	30.0278	30.3962	30.1205	28.7655	29.7455	27.8159	29.7111	27.369	28.7794	28.5351	29.1879	28.3502	29.5006	28.2547	29.2971	28.3203	26.2981	25.9287	23.6929	22.5965	25.3259	24.1458	24.4902	21.4227	28.0963	27.7391	27.1169	27.626	28.7929	27.3841	26.5926	26.1889	27.0425	27.3271	26.1158	26.4841	28.4429	28.9926	28.7054	28.3264	28.0236	27.9091	28.5465	28.4536	28.6407	28.5006	28.7497	28.8638	29.2067
AP3D1	29.1273	28.729	29.1795	27.9783	28.3907	28.259	28.6454	27.9347	28.3551	27.7015	28.0861	27.5357	28.6887	28.3816	29.1743	28.2523	25.7002	26.287	30.0684	24.4648	26.0623	24.9608	24.6414	26.1905	29.5351	27.8987	25.7854	25.7329	26.7028	28.143	25.9078	23.9707	26.6317	26.1834	23.7584	24.7194	29.093	28.6708	28.4732	26.5895	29.5564	29.5255	29.4845	29.5134	28.8636	29.4109	29.4676	29.7473	28.2632
DVL2	25.5182	26.0244	24.18	25.5487	24.9546	25.4243	24.4165	25.6689	23.3211	23.8873	25.3574	26.1014	25.1948	26.0187	24.6867	25.9214	25.611	20.2745	21.2152	23.6523	19.9124	21.2576	21.3296	21.9654	22.1914	26.1878	23.9092	24.9647	23.9122	20.3524	22.2958	18.8712	19.1791	25.8091	22.4026	22.9052	21.0311	20.467	21.3314	20.7151	24.493	25.9722	24.9681	24.859	24.3124	24.4854	24.3544	24.7034	24.275
STX16	23.5121	25.2432	24.4128	24.8903	24.0365	24.6686	24.1834	24.2621	24.6224	24.9242	25.4928	25.9488	25.276	25.3714	24.7788	25.1419	22.122	21.8365	21.1647	21.8883	19.8797	21.2067	20.8825	19.7643	24.8679	25.7259	19.8817	24.3742	24.9743	24.3825	22.3148	23.3813	23.6006	24.3223	21.9542	25.5617	25.028	25.4071	24.6459	24.3305	25.1907	24.9457	23.0582	22.3528	24.5887	23.4995	24.6076	25.0228	24.9288
APAF	25.4345	25.9718	24.8647	25.4832	26.4379	24.3324	24.6121	24.6839	20.9963	22.0903	23.3366	24.5459	24.5448	25.2809	24.7343	24.7603	21.0386	21.1664	20.9293	19.7144	23.6257	23.1624	24.2066	24.4457	24.9802	24.1366	21.7886	23.9173	23.8207	23.0752	20.1775	22.912	24.5432	22.0384	24.3337	22.011	23.7375	24.2705	24.6055	25.2213	24.1248	24.543	24.9474	25.6217	24.0781	23.9182	24.8659	20.9402	22.4207
CDIPT	24.463	21.6921	26.2965	26.1665	26.8313	26.1701	25.8423	26.5233	23.3723	26.3041	25.5139	25.8064	26.7176	26.3055	27.5551	25.9383	25.2321	25.4554	24.7313	25.1332	23.2152	22.8779	24.7243	24.6287	27.3994	26.1686	27.4487	26.9666	25.0491	27.2712	26.0581	27.5645	27.256	27.2767	26.6228	27.1461	27.0644	26.657	26.9369	26.3237	28.0002	27.9925	27.7468	27.6522	28.0971	28.0263	27.866	27.9814	28.3683
CHK1	20.9775	27.0249	21.1561	19.4782	23.4706	21.8411	20.6495	21.3089	21.6962	21.104	21.4752	21.8916	19.8831	20.9663	19.6277	21.3174	25.5691	25.5501	25.9306	25.7744	20.9138	20.7762	24.8155	22.5152	18.7136	20.3884	22.4041	22.0536	19.95	20.223	22.6248	25.1894	25.3992	25.8525	25.017	25.1407	26.2037	25.3115	24.9889	25.1137	21.804	22.424	25.6933	25.807	23.125	22.1114	24.7081	22.2158	21.0709
FPGT	24.0363	20.165	24.4444	23.7001	23.6948	20.6524	23.3477	24.1098	21.7245	23.9457	23.9739	25.4828	24.3304	23.9743	24.4176	24.6802	21.811	24.8037	21.2898	24.4717	21.7087	19.9855	24.4289	20.2257	23.9507	23.5815	23.8025	23.7055	22.2199	23.066	22.8901	23.8831	23.891	23.5097	20.452	24.2266	23.1979	23.5046	21.7858	24.0895	23.9335	24.8341	24.1067	25.2027	24.4664	24.6616	24.4844	25.1076	24.6018
TPP1	26.9781	26.4059	28.1933	27.6058	28.4629	28.576	21.6988	19.3151	28.6919	30.4259	28.8789	28.15	28.5388	28.9432	29.2676	28.3522	27.4378	28.5762	24.6681	25.4126	21.4409	20.7368	26.0958	21.5712	26.6175	21.7397	26.313	18.7264	28.1457	27.9586	27.1968	26.555	21.778	21.4223	21.898	24.52	26.8464	27.1873	28.1081	27.7009	27.1647	27.2837	27.2222	27.2814	28.3656	28.7491	29.2778	29.2223	27.6301
TCRG1	25.7534	25.3716	23.148	24.0368	23.5645	24.4088	23.5503	22.4911	23.5516	24.8772	23.4837	23.8892	25.5179	24.6995	23.2481	24.1759	23.6655	21.7826	22.0135	21.7053	21.7154	21.1877	20.2927	20.1811	25.6248	25.2122	24.582	23.4344	26.3352	26.1879	23.5138	22.2102	25.1548	24.267	22.7634	20.657	25.6965	26.1556	23.8165	26.2757	24.4611	25.599	26.2234	27.7272	27.4212	26.9619	24.1594	27.2343	23.8597
NDC80	23.9785	24.6961	24.4176	25.4364	20.6662	25.6003	22.041	24.2522	24.2721	24.9546	20.2609	21.0281	21.2993	25.5806	25.2575	24.0673	22.0416	23.7663	20.7139	20.4891	22.4149	24.2495	25.837	26.7935	20.5179	25.2996	20.7395	22.807	25.0695	23.5807	20.9835	25.1492	25.7355	21.4423	23.8082	23.8513	22.5171	26.0678	25.231	24.7451	23.0216	21.7146	22.9369	22.0083	20.9555	22.2262	20.8347	19.0455	21.6446
NRP1	19.1078	21.0488	26.5187	26.1813	27.8917	26.7223	26.2728	24.272	20.8497	25.3791	19.7231	23.1753	25.7971	22.895	24.8223	21.3346	23.1103	20.5027	24.3697	24.4507	25.0469	21.3328	25.3688	21.2924	21.2271	20.3875	22.062	20.9402	21.8925	21.9201	24.2636	20.1418	20.8111	21.2712	19.7021	23.2597	21.298	23.6837	21.672	22.4805	26.0653	24.9967	27.4213	26.0386	26.0332	24.6446	24.9345	26.028	26.273
TNPO2	26.402	26.9964	27.4313	26.4698	26.7516	26.6854	24.1577	23.9448	26.8136	26.6112	27.2627	25.771	26.4471	26.5909	28.1945	26.7008	21.4011	21.133	28.1065	22.4313	20.0527	22.0625	21.7707	20.1738	27.5159	22.7477	24.9326	24.4423	25.9702	23.4782	22.7974	26.5331	25.5941	22.5122	26.7577	20.0273	26.6843	24.0319	26.243	23.1067	27.848	26.2385	26.9444	26.3275	26.4468	26.203	26.8208	25.4714	26.7696
UN13B	21.3248	21.3234	21.0703	19.0971	21.2158	21.4942	19.9399	21.9541	21.2705	21.4012	23.7362	21.4808	22.8317	22.8133	19.5321	22.405	21.6941	19.5416	20.2925	20.6815	20.391	20.7348	19.9259	22.3064	21.5594	21.7814	20.4718	20.4575	23.6277	21.2461	21.5621	20.6138	20.8346	20.6276	20.6751	21.2966	20.6413	22.7952	22.054	21.7402	22.3307	22.0724	21.4107	22.3916	22.8585	21.1675	22.7072	21.9359	21.987
SCAM3	27.4201	27.2823	28.836	27.4367	28.4231	27.9225	27.8306	27.0036	25.8464	25.4973	28.301	28.7971	29.4082	28.6322	29.0296	28.5343	26.1393	25.9027	27.0413	21.499	24.6167	26.1058	21.0164	25.3028	28.3794	28.1486	25.8314	24.8102	27.4145	28.4569	25.1544	26.1942	23.5796	22.7886	25.8441	24.1316	28.5248	27.0195	27.2086	27.2402	27.0285	27.2938	27.6952	27.6396	26.8213	26.8618	28.1361	27.1554	27.0542
OPLA	25.9845	26.0366	26.269	25.7893	26.4714	26.7685	25.2957	26.1497	25.4536	25.1602	26.6713	27.0309	26.7125	25.8272	25.4587	25.7179	22.3518	22.8123	24.2956	25.4361	23.3076	21.2069	29.6702	24.9338	22.5063	23.9965	24.7175	22.6967	23.005	23.6127	23.3211	25.886	23.1653	23.4931	22.7014	24.338	23.0257	23.9891	24.1502	23.5318	25.4174	25.5879	26.395	26.0541	26.6905	27.2244	25.7627	24.6037	25.9068
BACH1	21.4347	20.8687	22.9553	22.9374	22.9176	21.2212	24.8282	21.3904	24.0728	24.251	20.6206	22.5254	23.3358	21.4806	20.2325	20.5059	19.8008	21.9539	24.1534	20.1188	21.3341	20.4262	19.9837	19.455	18.224	19.2691	21.7505	21.2245	21.0536	20.9885	23.2109	20.5578	20.8585	22.3487	19.8177	21.8607	21.9554	21.5327	22.1157	22.5068	22.9352	23.2071	24.0043	22.8706	24.0581	23.4477	22.4149	20.8632	22.5335
BCKD	22.4631	21.7403	21.8576	21.3976	21.282	20.5654	21.8138	21.1621	25.7022	25.7727	23.6078	24.3259	24.407	24.2749	21.5473	25.0657	23.9738	25.8109	20.3905	22.2251	21.3601	21.7115	24.8001	21.6837	25.6076	24.9532	21.6463	21.0388	24.5733	22.4287	21.5296	23.1729	20.0559	20.6656	23.0924	21.6744	24.5789	25.1955	23.9607	21.9894	21.5036	25.2777	23.8546	24.1939	24.8682	25.4415	25.0977	25.1986	22.531
IFIT3	23.146	25.3966	25.5612	23.6178	25.8701	24.3611	26.9322	26.7836	26.3814	24.8467	29.5199	27.0932	30.7865	28.9052	30.244	28.3523	20.4851	22.2894	21.0467	24.4937	20.7206	23.6617	24.3629	23.7527	23.4553	24.0313	25.1609	25.7993	24.7246	24.5194	25.6993	26.3541	26.6951	25.4466	29.2324	26.3144	30.0398	28.4045	28.7725	26.696	29.506	28.8716	30.1396	29.5704	28.4607	27.9358	26.4236	26.8701	27.4036
GEMI2	21.3562	20.1704	20.8784	20.3958	21.1839	21.3875	24.0913	20.6217	20.3341	21.3702	20.8	23.7346	20.478	20.746	20.6992	23.4059	19.5809	22.05	21.4013	19.7961	21.7783	20.3767	19.8898	19.5649	25.2056	25.2148	18.0748	22.5284	18.6992	20.8544	20.9539	20.3534	19.9238	21.2822	19.4672	21.8111	19.8001	22.3885	23.4716	24.2713	20.8556	21.8552	22.85	22.9959	23.0285	21.7969	21.8513	22.8639	21.9234
TIM23	25.6283	25.409	24.3699	24.0024	24.9368	24.6063	24.1419	22.366	21.8747	21.8915	25.4473	23.8107	25.4537	24.0133	24.0599	25.2835	21.6986	21.3495	23.3894	21.6101	21.1296	20.0645	23.3129	21.4402	25.2151	24.3663	20.2141	20.8148	23.6922	24.0559	22.5881	19.5845	22.3181	20.1637	19.1616	21.2417	24.6937	24.456	23.4896	24.9461	22.8309	24.0953	22.5814	24.0046	24.2918	22.3545	24.8506	25.29	25.0321
UB2L6	24.1255	21.9999	24.7476	24.3784	24.7818	23.4809	20.9966	21.2412	23.1672	22.264	24.4946	25.3655	23.9881	23.5207	25.036	26.0385	19.7394	21.8593	20.0318	19.7976	20.2447	20.5997	20.74	20.2822	20.0542	20.9991	19.9872	21.4189	20.6389	21.8116	21.8622	20.5821	21.0913	21.8967	21.0313	21.7852	20.9183	19.7457	20.591	20.8255	22.4816	23.2704	22.9697	21.8044	24.6024	22.6802	24.5038	24.2867	20.6113
CSKP	26.2108	26.2867	28.1575	27.5292	28.3724	27.0291	27.6214	28.0631	25.3756	25.7485	27.0411	26.4842	27.9504	25.7869	25.5206	26.6461	22.7155	26.1623	26.8478	26.5433	24.2608	25.2887	20.3288	25.0889	25.3981	25.8165	27.614	28.2917	26.3666	25.2033	25.0304	27.6271	28.4966	28.3586	28.3511	28.8767	27.1697	27.0644	27.5619	27.2618	28.6982	28.3475	28.5651	28.865	28.1462	28.3409	27.8912	27.2334	27.8302
PLD2	19.239	21.0302	21.3542	21.0051	20.7278	21.8243	20.9526	21.4996	21.2308	20.2073	20.6364	21.1449	21.1773	21.3677	20.2068	20.6961	22.0886	21.9837	20.5626	19.5174	20.7265	20.4009	22.6358	21.4375	22.2483	20.8982	22.2798	20.5936	20.5258	20.4917	21.8385	19.7645	23.2703	22.138	21.1807	22.7791	19.4529	21.4074	20.678	20.6998	22.0025	21.5565	22.1702	21.6049	22.8255	23.317	22.695	22.7055	21.2917
CLGN	21.2255	20.0745	19.798	20.4492	22.0261	19.7129	20.9868	21.4907	24.2772	23.5088	22.6548	23.5715	25.1363	23.8901	20.5636	23.8259	22.0717	20.8268	19.6603	20.4829	19.566	20.066	20.4285	20.5486	23.357	20.6461	20.3323	20.5461	21.6831	21.1555	21.1215	21.6498	21.3674	22.2101	21.8435	21.9441	20.9714	20.1353	21.6801	20.8445	21.6088	25.0359	20.7598	21.9806	23.8733	24.4631	24.7017	24.8808	21.4507
DSCR3	23.5694	24.7001	24.4315	24.2945	24.9132	23.7064	25.7181	24.997	25.9216	24.1007	26.2445	21.7145	25.7823	25.9555	25.9982	25.4265	21.327	24.6959	21.772	24.7307	23.5346	23.9106	24.4649	20.9941	23.6961	24.3707	24.7816	22.4627	25.0995	23.87	21.8252	24.6797	23.5404	22.0289	25.522	20.7648	24.6538	24.052	24.9867	23.0747	24.6078	25.2317	24.9598	25.3951	25.5703	25.4228	25.385	25.0361	24.2928
MYPT1	30.1398	29.8314	29.8028	28.9269	29.4379	29.2287	30.0646	30.6537	28.5639	28.4972	29.7023	28.4459	29.4052	29.0381	29.1261	28.3802	27.2127	27.6787	26.4792	27.4221	27.1069	27.2325	27.5714	24.3167	26.1558	28.4536	28.8033	28.3694	28.421	27.9785	28.2512	27.3549	27.9875	28.1944	26.3638	25.9374	28.3052	28.2184	28.5899	27.6965	28.987	28.9894	29.5696	29.1666	28.8555	28.9606	28.317	29.084	28.6209
GAK	25.7124	25.5095	24.0909	25.7836	24.6946	25.1946	25.6181	25.8962	27.2256	27.5533	26.6214	27.5007	28.3975	27.6618	25.4148	26.8011	25.3829	24.9829	26.5282	24.4113	25.8409	24.3847	25.065	24.5254	25.8685	24.9402	23.1158	26.0432	27.2486	26.123	25.3492	24.5498	23.3248	20.9002	21.546	24.807	26.5186	24.1141	26.8661	25.572	26.9841	27.3669	27.3469	27.2271	27.1667	27.54	27.4084	27.0061	27.5452
HNRDL	27.9715	26.8901	28.824	28.6701	27.8928	27.6867	26.4041	27.5209	28.0267	27.3466	29.0816	28.3599	28.4402	27.0029	27.3855	28.7273	28.9139	28.6369	28.3124	27.87	28.9667	25.9077	28.5542	28.3582	25.842	21.8386	27.6123	27.1418	28.6415	27.2438	25.5335	26.3721	28.9225	28.124	26.0666	26.38	28.0296	27.016	28.2072	27.418	29.3715	29.3392	29.693	29.2582	29.5192	29.9109	29.6835	29.7487	29.8988
XPO1	29.1061	28.7984	30.5297	29.3649	30.2388	29.4273	29.5925	28.5442	28.8951	29.1441	29.1935	28.1361	30.2087	29.8134	30.2762	28.6521	26.7918	26.1655	24.4917	25.6145	24.4243	22.3042	25.633	24.8575	29.6361	29.0733	28.6611	28.8016	28.986	28.4984	28.6128	27.6016	28.945	28.2399	28.2006	28.4906	29.3451	29.299	28.3641	27.786	30.0432	29.8444	29.746	29.5055	29.9309	29.9097	29.8456	29.7494	29.6435
ARHGA	24.2464	24.5469	27.3894	26.4919	26.4044	24.3186	24.9576	24.9733	26.3339	26.8571	27.7581	24.931	27.0918	26.1593	27.1228	27.5162	25.001	24.7245	23.4055	24.0443	24.0436	23.0796	24.892	25.2856	25.4466	25.1314	25.1242	24.1712	24.2893	25.1151	25.3976	25.7297	28.9947	27.8671	28.3338	25.0422	27.5469	25.9924	27.4346	26.3167	26.4241	26.9562	26.6656	26.8125	28.5195	28.6276	27.0315	27.641	22.2107
SPTN2	23.3156	23.2397	21.7157	24.4269	27.5237	22.717	23.3342	24.7777	23.649	22.594	23.159	24.8607	23.0239	23.8682	26.5252	24.3008	23.85	23.9671	24.5061	24.2625	22.2444	25.0541	24.8963	22.8701	25.3241	24.6038	29.8809	27.6219	25.321	25.3022	27.8758	29.4627	29.5366	27.8203	29.2846	26.8771	28.1592	26.0034	26.6948	26.1024	30.1964	30.6182	28.2141	27.997	27.8707	28.0963	28.1811	27.9819	29.4337
PLXB2	29.1698	29.2147	30.0241	28.6784	30.119	28.9395	28.5676	29.0353	26.7478	27.3725	28.3758	28.4739	28.8392	27.8204	28.8158	28.1536	24.0596	22.0603	25.7933	25.8048	25.3292	24.4827	25.9737	23.4832	26.4624	27.871	27.5291	27.2492	26.9784	27.0318	27.4476	28.5472	29.4473	26.6285	28.9552	27.85	28.8017	27.7436	28.1717	27.5447	28.9119	29.3968	29.7779	29.5294	29.6886	29.5546	28.9616	28.8566	27.5628
RIMB2	21.0206	22.2392	23.2908	21.5967	21.2539	19.9996	20.652	22.6528	20.5208	22.2902	23.1813	23.7768	20.8037	20.6446	21.0229	21.4668	21.8338	20.4506	21.3215	21.5705	22.0334	21.3648	22.4345	20.5552	21.249	22.0031	20.6294	20.335	20.9674	22.015	20.5891	19.703	21.735	21.4026	21.4541	21.7642	20.9117	22.0477	20.4513	20.6169	22.6832	24.2309	22.114	22.349	22.4908	24.2611	24.4924	24.0194	24.0184
TRNK1	20.6199	24.2255	29.0729	26.5656	28.4426	27.4339	23.8526	27.511	23.2894	25.1085	25.4434	26.3014	25.0887	24.3435	24.906	26.1494	25.4768	28.5505	29.1802	28.0601	26.956	28.1754	28.6065	28.2866	25.4334	24.2341	26.2932	22.7596	26.4883	25.7937	25.3294	26.4346	27.3694	22.1367	27.3592	25.7286	25.1139	23.7824	27.1168	26.3732	20.236	26.2197	20.796	24.4569	25.0544	20.2709	21.2206	22.5751	26.4477
SYNEM	21.5048	21.1907	20.1868	20.2405	19.8461	20.9835	18.2004	17.0493	23.1799	23.9261	24.8678	24.428	29.7424	26.3246	26.9761	25.9716	27.7093	23.92	26.8274	28.2825	23.1969	24.2013	27.3898	27.5129	26.3935	23.764	28.8542	24.5046	25.7986	26.1308	24.0651	28.9473	29.9761	25.631	31.2763	26.7691	30.1338	27.0834	30.079	29.0153	32.7421	32.6323	32.624	32.289	33.1289	32.3685	31.8876	30.8897	32.5017
PUR4	28.2692	28.0175	27.5724	27.4094	28.0973	27.5619	27.3129	27.4798	27.0169	28.0542	28.2235	28.223	28.9307	28.6457	28.1842	27.9243	22.2639	20.7592	23.1601	24.0801	24.2033	23.1747	19.6855	20.7434	27.5237	26.7696	26.6791	26.3207	27.75	25.9197	24.6162	25.4278	24.3524	23.8248	25.1573	22.9463	26.4313	27.0878	27.6903	27.572	27.4601	27.7408	27.5373	27.876	28.0072	27.295	27.6608	27.6072	27.2203
NACAD	22.9865	23.7649	20.395	20.1244	22.4143	21.1523	23.0261	23.5145	23.4481	24.9505	26.0504	25.9292	23.7238	23.8285	24.064	22.306	20.8073	21.4988	20.4441	19.9935	20.164	24.9101	21.8342	25.0724	21.8288	22.4354	20.3819	20.4688	23.1519	22.3563	20.5626	26.502	21.6784	21.2478	21.4604	20.5909	23.121	21.4016	23.1249	19.4202	26.4673	24.9039	22.212	22.2418	26.6878	26.4234	27.57	27.4953	30.3666
DCLK1	25.0029	23.3108	23.303	23.2288	25.9064	25.2368	27.5652	26.9091	22.1704	22.3141	21.4569	21.5514	21.8087	21.8266	22.6391	23.3773	20.7741	22.7246	24.8594	22.6808	21.2402	21.5838	20.065	23.2425	23.5837	24.3318	28.3698	27.3451	24.6178	25.3156	27.4492	27.9224	27.7169	26.3966	27.4732	26.6539	25.3517	24.0056	22.4564	21.9124	30.214	30.166	29.4861	29.3007	29.9716	29.7932	30.5836	30.3914	29.8532
ERC2	22.2506	22.2041	20.0968	20.77	21.1721	20.2632	21.8987	21.2998	21.3728	21.3943	18.0875	20.6353	19.9647	21.8885	19.5297	21.3551	23.9855	21.8681	25.389	20.489	20.7278	21.3588	19.7915	24.6969	22.2436	22.7223	20.9474	21.7322	21.6637	20.6269	20.3914	19.0303	21.6425	22.2912	22.5873	21.5578	19.8474	25.1693	21.4643	21.713	19.7517	19.0963	19.7762	18.8553	21.5396	19.9759	21.6024	20.19	20.6673
ARHGB	20.0602	23.5587	22.8982	24.4504	24.0398	25.9009	23.8452	20.9948	25.095	24.8006	24.6904	25.103	24.4102	25.2452	25.7313	25.1699	20.4333	20.9467	21.0941	20.9289	20.7179	21.1355	21.747	21.486	25.8261	20.6755	21.0492	23.5254	24.0616	22.1006	24.7954	21.1006	21.0286	24.9873	23.2618	25.8449	20.6904	25.2548	24.6283	23.9546	23.1182	25.1047	23.1192	23.1382	24.276	24.5325	24.5292	22.9125	24.7826
IKKA	25.2864	26.1944	23.5852	26.1704	25.3091	25.0662	24.5913	24.3484	25.9396	26.0953	25.3615	24.7026	24.3917	26.0886	23.9674	25.4192	27.1459	25.5096	26.6946	19.2956	26.8939	26.4855	26.2865	21.535	25.299	27.3432	19.3732	23.375	24.2325	24.2732	22.0802	26.0444	21.6488	25.3633	23.2669	23.4225	24.7377	26.0259	24.9514	21.0988	24.0792	25.6613	23.4639	24.4603	25.916	25.587	25.6146	24.5754	26.5503
FYB	25.3781	25.4376	24.8268	20.9651	20.8062	21.0857	19.7895	20.4079	21.861	25.1753	19.1571	22.2313	21.2556	25.9379	24.2686	26.0963	28.5722	20.9772	20.6965	26.3746	25.7198	21.1602	20.7339	19.9629	19.9219	22.4606	20.0851	23.03	24.9393	23.3851	20.5682	21.7802	22.783	22.7286	21.6405	23.9145	20.6131	25.7318	20.975	22.2055	25.3213	26.1311	24.6522	24.6257	20.9041	24.8586	24.992	25.5699	21.9231
TBX3	21.8876	21.2072	18.7166	22.1707	20.595	22.1366	21.3159	21.7883	21.8332	21.3316	21.092	21.7059	20.4402	20.7677	21.8386	21.7333	24.0667	24.8658	21.1186	21.7296	18.8688	21.9284	24.319	26.3007	20.4319	20.7777	22.951	20.2042	21.9051	25.5449	22.6543	21.475	20.6065	27.3999	24.8623	24.1236	24.1625	21.2095	22.1778	20.7034	21.3147	22.3069	20.7077	21.0219	20.987	20.3226	22.8053	21.403	21.2062
DEGS1	23.777	23.7296	22.8698	25.3682	22.3686	21.1271	18.9918	23.3473	25.2713	21.4809	25.6535	25.7884	25.995	25.1372	25.3333	25.0251	25.9131	26.3557	21.8806	19.4246	26.1867	24.5499	21.5994	20.5968	25.5729	25.4964	21.0118	20.9589	18.2036	23.8813	23.5643	22.2891	21.8301	21.5358	20.3034	20.7504	26.0757	25.0179	24.6564	25.1242	26.3452	24.3146	25.3212	23.4955	25.1981	21.0836	25.4136	22.0304	22.4666
ARC1B	31.3404	31.3754	31.8915	31.8319	31.6704	30.9574	32.3352	32.325	29.8973	29.677	31.6057	31.793	31.3833	31.5532	31.003	31.8637	28.6963	28.8294	26.9078	21.8329	29.1477	28.8617	28.6153	28.6435	30.6112	30.7331	29.886	29.8034	30.239	30.7622	29.5922	29.3616	30.1951	29.4442	29.3866	26.8808	30.4496	28.306	30.6391	30.0397	30.8027	30.9118	31.1281	31.0833	30.7631	30.6534	31.1836	30.9624	30.3086
ARPC2	31.922	31.8137	32.3168	31.9929	32.2202	31.7771	32.5082	32.4337	29.8102	29.382	31.8603	32.4255	31.8702	32.0299	31.271	31.5398	29.6457	29.3234	29.6768	28.9627	29.8028	29.5176	29.7174	29.5117	30.8852	29.3704	30.5058	29.9499	30.806	30.6468	30.6495	30.599	31.1527	30.067	30.207	30.2485	30.4922	30.4248	30.9721	31.1934	31.2446	31.3402	31.5158	31.4781	31.0906	31.1609	31.3463	31.6454	31.0947
ARPC3	29.3146	29.9138	29.7442	30.0301	29.7447	29.72	31.007	28.1688	29.5137	30.3339	29.9297	29.2112	28.9716	29.2351	28.8988	25.3939	23.5234	22.8173	25.5408	24.2246	21.6314	22.3164	23.6534	21.7002	27.401	25.3863	28.7988	29.4804	27.4315	26.5191	20.2305	23.719	27.62	22.0223	26.2959	27.8984	27.5281	29.5793	28.1375	26.9745	29.2777	29.1563	29.2774	29.7946	28.8113	29.1419	29.4048	29.9207	28.6765
PLS1	26.1425	25.7951	25.4148	25.9029	25.5442	25.7302	25.1267	25.8245	27.2111	20.6423	26.2737	26.7945	26.3744	26.7621	25.8687	26.8309	27.1639	22.7732	21.9858	26.0514	26.4054	26.613	25.6974	21.1187	25.181	25.4259	25.3105	25.7972	25.0174	24.894	25.9508	25.9519	25.3076	25.9052	25.1443	25.2003	25.6872	26.0639	25.0413	25.8288	27.2051	27.1834	27.2597	27.0365	26.9552	27.4025	27.1203	27.55	26.3302
PGRC2	29.9333	29.9878	31.7591	30.8662	32.0181	30.5772	31.4727	31.2208	29.206	28.4662	29.308	29.5881	29.1931	28.104	29.319	29.0104	27.401	27.2817	27.0566	26.9739	26.3028	26.6458	25.0449	25.3757	29.2822	28.5371	28.904	25.7998	29.0526	28.191	28.9127	29.2074	29.9985	29.2457	29.503	29.1645	28.7168	28.4455	29.3304	28.7028	30.0013	29.736	30.1037	29.9794	29.7982	29.888	29.4058	29.7116	30.062
RGL2	20.5382	21.8168	21.3523	21.2264	19.2719	20.8955	19.3074	21.0324	24.4993	21.2537	23.0426	23.3987	23.9486	23.1643	23.3924	23.4746	20.7401	22.332	20.4958	21.7398	21.3352	20.741	21.1444	18.6144	23.2107	22.9947	20.4753	21.4292	20.0564	20.8908	21.5299	21.3809	21.8715	24.7139	23.6224	21.7512	23.9707	22.7054	20.6089	21.6171	20.9575	20.9491	23.1992	21.4985	23.243	23.1091	23.1154	22.7602	22.1441
PFD6	29.2822	29.2509	28.9006	27.8991	29.005	28.8982	28.6026	27.9781	28.0505	28.0818	29.0385	27.2261	28.8957	28.0326	28.9653	29.0142	27.0069	26.9353	26.0663	26.0035	28.7481	27.2648	25.7619	27.3726	21.8316	23.3818	28.8632	28.4084	29.3143	30.0154	26.462	29.1043	28.2558	26.899	28.0898	20.7379	29.2335	26.7301	28.7906	27.2536	29.0671	28.9272	28.6389	28.5392	27.9423	28.3577	28.0142	27.953	29.0623
LAMA5	23.8073	21.2827	21.4316	22.6442	19.9742	22.2578	22.3311	21.5088	21.7325	19.8577	20.9334	23.1382	20.9617	20.2023	20.5902	22.517	31.6662	31.9622	31.5481	31.3638	31.4679	30.9214	31.5301	31.7149	31.1852	26.6875	33.3209	31.1707	32.9808	29.8509	28.8041	32.8386	33.8725	30.4153	32.7732	29.5688	32.3354	28.984	32.3443	28.2835	32.393	32.5719	33.2355	33.1983	33.1128	32.9996	32.6728	32.6621	30.6922
ZN185	21.3366	19.4397	21.7674	24.3638	22.9144	22.7074	21.1682	23.5244	21.5531	25.4782	22.1324	24.2089	22.3932	20.85	21.4833	23.3872	24.7077	20.9847	21.8965	21.2012	22.8665	22.0345	25.8731	24.9832	24.5553	23.0536	27.4768	25.5311	23.4201	23.6991	25.4532	27.5864	27.7804	23.489	26.5783	24.1131	20.4384	21.9113	22.9008	22.6373	22.4885	21.6613	25.3111	24.3037	21.6429	21.2661	21.9362	21.8833	20.6267
VGF	22.2299	21.2467	21.2415	21.0192	21.61	20.8448	20.5029	21.1194	19.2994	19.6494	20.7249	22.2809	20.3796	21.1769	20.7881	21.3884	20.9568	20.3779	21.3797	20.5727	20.7169	21.9444	20.7462	20.2624	23.0704	22.3859	23.4042	22.5592	19.2706	22.9472	22.992	20.201	21.9488	22.3004	24.4869	23.1975	23.2118	21.1829	23.8074	23.901	31.7349	31.761	29.4859	28.9347	26.9251	25.7055	31.0901	30.8568	32.7412
CLIC2	21.9913	21.4345	22.015	24.4626	22.0778	21.3948	19.5329	21.0531	20.8835	19.2585	20.5695	23.3391	20.7667	20.282	22.5412	23.489	20.8721	21.0393	20.1415	20.7722	18.9487	21.6302	24.3272	22.7766	21.0348	20.2256	19.3335	22.442	21.2658	21.1731	19.1706	22.0945	21.3348	21.9153	21.5198	20.7798	20.6598	20.4961	22.1783	21.6111	23.985	24.8895	26.1885	26.9798	24.8805	25.6438	27.6985	27.5221	22.1136
RER1	27.7657	27.1157	29.2067	29.0904	27.8942	28.0991	28.0901	29.2198	26.5846	25.1416	28.4963	29.4899	28.63	28.7713	27.8996	25.3423	22.6539	27.3273	25.2125	25.7912	25.9918	25.9253	21.9508	22.3702	27.4345	27.9425	26.3986	26.3117	27.7876	27.7212	26.55	26.6895	26.5075	27.0132	26.5086	26.8781	27.5087	22.0798	27.6962	26.3019	28.321	27.4083	27.9629	27.9535	28.0278	25.0755	27.7962	26.7969	29.4996
SURF4	25.4591	25.3117	30.252	28.9273	28.0317	28.3878	26.72	25.4902	25.5828	28.6892	27.9326	27.4393	27.8199	28.9207	27.659	25.5001	27.3972	27.3735	25.5082	25.8036	26.2969	26.2218	25.8717	24.8445	25.6017	27.1101	25.6427	24.5556	26.8289	27.3627	22.7382	20.6695	23.0981	19.7527	20.63	23.2701	27.239	27.3898	27.6384	26.5978	27.902	27.7601	27.8697	28.1922	28.2354	28.1796	28.717	29.0599	25.8973
SPTC1	26.4665	26.128	26.5779	25.4428	26.5836	24.836	24.7563	26.6023	26.8614	27.0353	25.5211	27.0885	26.7085	24.8125	24.8393	25.7028	25.6286	25.1029	20.659	21.052	21.5083	24.6647	23.4651	22.4833	25.2101	24.6151	25.1479	27.6476	23.0296	26.493	26.7012	21.824	24.9506	21.1297	25.4043	25.6109	25.8219	21.0018	21.5317	22.3851	26.6326	26.5291	26.9625	26.7657	26.8578	27.0234	26.6211	26.969	26.4599
SPTC2	26.1587	25.8518	26.2026	26.3501	26.5525	26.2912	25.4149	26.8768	23.5849	24.7884	24.4	25.7212	25.0362	25.493	25.3018	25.5425	19.7131	26.0016	21.2367	18.5787	20.6085	20.1752	22.0516	20.5385	20.3992	24.6022	21.3527	22.1315	22.2831	20.454	22.2291	22.3812	26.1709	26.0118	21.2025	20.8499	24.693	23.5283	20.5759	23.8525	24.6196	19.6019	25.3417	25.2703	25.0583	25.109	24.1982	24.1431	26.8684
OGT1	27.4978	27.5729	26.9862	25.9805	27.1555	27.2406	27.052	26.6905	28.0113	27.7756	28.0793	27.745	27.6853	26.7423	27.329	26.9665	26.7784	24.2693	18.8638	26.7317	27.1425	25.4676	22.1045	25.7794	26.5425	26.8099	25.278	26.1163	26.8116	26.5047	25.5381	25.6785	24.5705	23.8996	22.9214	23.3577	26.1898	26.5205	25.9481	25.5475	27.7114	28.3512	27.3815	26.8151	26.8489	27.0542	27.9038	28.036	27.689
PMM2	29.1203	29.3928	28.6336	28.6449	29.2183	27.9981	28.4616	28.0238	26.0212	23.9187	27.0407	27.2643	28.3682	27.119	27.2706	27.7671	25.5259	25.1593	19.776	24.0604	27.5626	25.8423	20.5356	19.97	25.7267	25.6548	20.4901	23.8876	26.3034	25.6886	24.648	23.9016	20.286	23.2002	23.6307	21.7296	26.3127	26.1353	26.7758	25.1765	24.4641	25.2902	25.8957	27.2084	26.2876	25.1592	26.6549	25.435	26.1127
TRI18	25.9949	24.5401	25.1917	25.346	24.712	23.5479	25.0426	23.5836	25.4457	26.4579	26.7206	27.4562	27.6794	26.9828	26.3193	23.329	20.9643	21.5896	22.8076	21.1149	21.5707	18.8871	22.0101	21.4887	23.9904	26.2905	22.8435	23.3917	24.7876	22.9523	24.4688	23.1443	25.4071	25.78	21.4218	20.9928	24.9955	25.9727	22.9962	24.9668	24.4531	26.5454	26.2371	26.5147	25.3252	24.6616	25.0166	24.6872	20.6379
HMGB3	25.7047	26.4329	26.8405	26.8176	25.3895	25.0233	25.221	25.6361	23.6678	27.2252	29.4443	25.9391	29.5192	27.8437	29.447	24.9099	20.9255	25.0351	22.4225	23.0058	24.2025	23.9879	21.6908	24.7095	21.4018	25.2618	19.8965	21.105	28.0637	26.4027	26.7623	25.6923	24.9861	25.9155	26.0772	26.5938	29.0824	24.8225	28.896	27.3601	22.7039	21.0145	23.03	21.3084	19.609	23.8602	23.4184	21.0437	22.3025
PPM1G	28.7449	28.4787	27.3228	25.2095	25.7468	26.1574	28.0845	26.461	28.6419	28.4076	28.1395	27.8182	28.3808	26.4156	27.3357	27.5566	25.1689	25.9207	23.7262	25.3497	25.0506	26.5373	23.5141	21.802	28.278	27.916	23.7613	24.6511	27.458	27.7482	25.388	25.0745	25.1795	21.9586	24.9489	24.1268	27.3848	26.7266	26.8077	26.712	26.4328	26.7148	27.4596	27.455	27.2813	26.6447	27.4973	27.1218	28.061
SHIP2	26.4711	26.4462	26.8412	26.9972	26.3268	26.5487	26.3572	26.6461	27.4113	27.3646	26.0798	27.3157	26.8039	26.2048	26.2136	26.7374	23.9183	25.4538	21.4711	20.2063	25.2388	23.7552	25.3927	21.4318	25.5183	24.5033	26.4475	25.0714	21.9928	24.4727	25.5661	24.1334	24.1187	21.5445	23.4898	26.1272	26.6759	25.2541	24.7507	25.6287	26.5325	26.4405	23.5966	26.4451	26.2111	26.2472	26.1036	26.7425	25.3806
EIF3D	29.2474	29.3334	29.2009	28.1734	27.3753	26.4001	28.3726	26.1081	28.674	29.2248	28.6062	27.8213	28.3135	27.034	28.0308	26.7837	20.9469	27.4552	24.6453	24.3987	24.7774	25.2805	24.4884	24.3298	28.6582	28.201	26.5873	26.1074	28.5453	26.5467	25.4708	25.105	27.0043	27.0952	26.805	23.7777	28.1295	27.6898	28.0965	26.2312	24.6364	25.0467	27.2192	28.2399	28.1245	28.1278	27.2694	27.9458	28.1421
EIF3H	27.8917	27.6358	27.9473	26.1676	28.6742	27.6447	26.2849	25.6307	27.7924	26.7862	27.5638	26.7544	27.0947	27.5489	26.5082	26.3923	26.1729	23.8096	21.5302	22.6895	23.0675	21.648	24.2371	18.3667	26.7419	25.5029	25.5146	25.9831	27.7383	26.4905	22.8894	23.7233	25.8142	26.4462	26.3232	24.8516	27.912	28.0803	27.9832	26.2836	26.769	25.727	26.3645	26.6417	27.1349	24.9017	26.122	27.6796	27.7966
BCAT2	24.7532	24.3861	26.7439	25.1309	26.4033	22.6547	23.8721	24.5051	24.1415	23.8515	24.7193	25.7849	26.1129	24.9406	25.8544	26.0348	21.0186	20.7214	20.1483	21.0203	21.4587	21.7999	20.7863	20.1198	25.9639	20.6094	24.2413	24.5188	25.5403	25.3284	24.3257	20.1843	24.2416	25.1346	22.9308	24.079	25.2883	24.6596	25.0169	23.6904	25.4693	25.8259	25.1653	25.6976	25.8337	26.4885	26.349	26.3591	24.6157
NCAM2	21.172	19.9698	19.4424	22.2439	20.1653	21.9635	22.405	23.742	25.3225	25.937	22.8112	22.3156	21.3511	21.9144	23.1602	25.1168	23.7643	22.1137	22.9582	20.479	21.1082	20.8294	25.9004	24.5096	24.8675	20.3692	27.5344	26.4608	24.8677	22.4297	25.6931	26.5669	28.6324	27.3204	29.0773	26.4376	25.784	25.0039	25.6934	23.3115	29.946	30.7586	26.8362	28.8139	29.8525	29.7873	28.7767	28.1133	26.4146
MOT4	25.7505	20.344	26.8397	25.5625	24.6157	23.6722	25.6372	27.1237	20.9234	24.2438	23.4735	21.814	20.5556	23.6956	23.3464	24.162	20.8018	21.6644	20.5801	19.9175	24.8015	25.3231	20.7017	19.8257	26.2372	25.8248	23.3358	21.616	24.2502	20.6407	21.1087	20.4775	21.61	25.7426	24.9295	21.7821	19.4613	21.4898	23.8748	21.1672	24.251	25.8925	23.1679	20.9552	24.1693	24.4204	24.3326	20.9884	24.145
CAN5	21.9889	23.8408	24.3644	23.1328	24.0751	25.0011	24.5276	25.0505	23.4142	26.5872	27.4725	25.6103	26.7747	26.1735	26.4353	25.8226	24.9537	25.0119	24.3558	24.1592	25.8524	21.5156	25.5366	25.3098	27.7267	26.8869	26.9269	26.0052	26.8882	25.0358	27.5891	26.8086	28.3694	28.1598	27.7612	28.1159	27.7396	26.9652	28.8049	27.9241	28.6502	28.3342	28.6925	28.108	29.1242	29.3875	28.6284	28.7283	28.173
YKT6	26.4323	25.9434	28.9439	27.983	28.583	27.4941	28.2928	27.8799	26.718	20.9944	27.9581	26.8358	28.0514	27.4107	28.089	27.7167	25.5972	25.3333	26.3551	26.3839	24.4654	24.9325	26.3606	26.0653	29.0882	27.5494	28.0666	26.4443	28.2059	26.6902	26.5637	28.2814	28.3265	28.1543	27.7823	25.6137	27.9869	27.5365	28.4541	27.638	28.656	28.3955	28.2942	27.961	28.122	28.2717	28.284	28.4589	28.8843
TPSN	25.6719	25.7234	27.1851	26.9817	26.4519	25.9716	25.5553	25.04	26.1124	27.2593	25.7971	26.8163	26.8082	26.3854	25.4745	26.3675	25.6241	25.5778	18.8814	24.4138	24.8072	24.5563	21.3508	19.727	26.2071	25.6567	25.9568	26.0891	25.9854	25.4309	26.7505	25.2228	26.0547	21.1748	25.5414	21.186	25.5452	21.8606	25.7	25.9167	26.9122	27.0132	27.7092	27.4608	27.2639	27.0658	27.9424	27.8438	21.003
FABP7	21.4743	20.9751	20.6614	22.0976	23.3444	23.5716	23.9044	23.297	27.2074	23.5811	29.6098	27.7373	29.1815	25.6448	28.7199	28.7032	23.6665	23.6504	24.3246	21.357	24.0076	26.9326	20.464	19.8762	23.2693	21.3649	25.2301	19.6824	27.3876	25.4944	21.9338	19.6875	27.199	24.7595	25.7465	21.4522	28.18	25.0234	28.3362	26.0721	27.4244	25.4068	20.549	20.2191	27.7715	27.989	29.4489	29.3808	28.2763
ZZEF1	20.5167	21.7694	24.7428	23.9089	23.7295	24.4598	24.2627	21.3608	23.8311	24.6058	24.1128	24.2671	24.601	24.6303	24.5088	24.1785	21.816	23.6941	21.4188	20.0655	21.0677	21.5122	22.496	19.6131	24.4353	20.791	19.5367	22.0168	24.4111	20.072	21.9642	23.7554	20.5567	23.9253	23.8986	21.4406	23.6221	23.9306	21.2278	21.0373	24.5683	24.1711	23.3766	24.4499	25.0664	25.1496	25.1507	25.4975	24.6086
ASAP2	25.8961	25.2429	27.2408	23.1076	24.7278	25.2865	26.3963	26.4428	27.1913	26.8979	26.6041	26.7226	28.5413	26.4136	28.3217	27.122	24.9408	24.9292	20.0115	26.3621	26.0267	26.212	25.2088	25.6906	22.2864	25.4683	27.5782	28.0631	26.4279	28.3989	19.9737	20.2746	26.0078	26.9135	20.2976	31.8032	26.8736	25.4733	24.1793	20.3594	26.575	26.3173	27.1638	26.8259	25.9219	26.3798	26.4304	26.2639	26.9094
PLXB1	24.2526	26.2561	25.2063	25.7113	25.4185	25.3094	24.9787	25.5524	25.7983	26.5045	25.477	24.893	21.6074	25.2195	19.4163	25.4913	24.947	25.2649	25.3073	25.5622	24.8297	24.479	24.0953	25.1176	19.3398	24.0943	24.01	26.2038	24.8123	20.8123	26.1796	25.2451	25.2021	26.1192	25.5811	25.8494	25.0136	23.341	24.6842	24.2656	20.8719	25.9378	25.4766	21.8179	25.0722	24.607	23.6873	24.273	22.3515
CYB5B	28.9865	28.9468	29.5488	29.9137	29.3628	29.5245	23.9847	27.6742	28.8981	23.5427	28.8938	26.5569	29.0063	29.612	28.4436	26.4353	28.2691	28.208	27.4258	27.499	27.8306	28.0871	25.6286	27.9426	28.9435	26.5194	28.4569	28.3661	28.5099	28.0249	27.8107	28.8005	26.8355	22.079	28.713	27.2346	26.8231	26.4856	28.6172	28.0465	26.3802	25.494	25.781	26.4888	26.9021	27.0001	26.2655	26.4241	20.7364
PHF1	20.1158	22.6966	22.3394	21.1159	21.7764	21.8294	20.7797	21.0644	25.3404	25.3556	23.2252	21.3052	21.6335	21.746	20.7933	22.4004	21.6403	21.0366	19.918	21.1224	21.7243	20.3251	20.6214	21.2405	20.1817	20.4902	20.5942	20.824	19.9252	21.2737	22.8674	20.2382	22.3634	22.5935	23.5444	23.1398	20.0096	22.1096	20.7765	21.8773	22.9487	20.4151	21.1556	22.1293	20.9726	24.8386	23.7197	24.5553	23.131
2004-09-01	24.0581	21.6929	20.2397	19.7172	21.3015	21.4063	23.3911	20.5481	22.1198	21.0331	20.9264	25.2629	21.7271	25.3774	21.3778	24.7284	21.2879	22.4546	20.0594	19.6775	20.9503	21.4629	20.0871	18.0765	19.9735	21.6963	25.4057	24.8225	20.4056	19.6576	25.6695	25.535	21.5853	25.9736	20.5619	20.9444	24.8022	20.6185	22.0137	24.3294	25.6075	25.5689	24.5029	25.0083	24.5953	25.9622	25.5835	20.7756	25.5042
DC1L2	28.6579	28.7309	28.2625	28.9629	29.4279	28.8606	28.6158	29.0142	27.8592	28.7061	31.1547	29.2506	30.5127	28.5217	30.4521	28.1986	24.7735	27.7312	26.0444	25.9816	27.3258	26.6462	27.1096	24.7054	29.1502	29.2288	27.9054	29.4189	29.7849	30.233	28.9062	28.227	29.587	27.774	29.2686	29.4053	29.3763	29.5589	28.6679	29.1572	29.6733	29.3793	29.2391	29.4888	29.7873	29.4471	29.5037	29.6685	29.4737
RFOX2	23.5677	24.1707	24.2388	23.7505	22.5076	22.9085	22.4717	22.7223	23.906	23.6539	21.7555	22.4884	22.2185	21.583	22.4393	22.7162	21.2908	20.7997	19.8101	20.8836	20.4929	21.9046	21.5931	21.432	22.291	20.2377	20.9616	22.2004	22.815	22.6985	22.0675	20.1477	21.1175	21.3837	21.3497	21.8556	22.8218	23.0068	22.465	22.8894	22.1917	22.6055	21.0266	21.38	23.3932	23.211	23.0783	23.3652	23.6127
PAPS1	28.1674	28.1312	26.474	25.8102	28.1842	26.8035	26.4569	26.2885	25.6814	26.3719	24.3264	25.3214	28.1649	27.5879	27.1494	26.7137	23.768	26.2696	22.5067	23.1423	25.4518	25.0926	25.1529	24.8749	24.0035	24.3155	19.7657	22.0538	22.5776	24.0613	24.1603	23.5241	23.7463	25.5113	21.4568	25.2116	25.1943	22.6213	25.7595	24.6334	25.5878	24.3372	25.7239	25.2076	24.9157	25.0338	25.0182	25.4615	26.1317
ZW10	27.515	27.3757	26.9904	27.2565	26.9095	27.2266	26.5057	25.7724	26.989	27.0822	25.7128	26.0776	24.1592	26.1618	27.0218	26.4053	22.3172	19.8891	22.0536	19.5651	25.1584	19.9857	21.5913	21.3223	27.9325	28.2256	25.8641	26.8495	25.2975	26.2152	24.6671	26.4378	25.4496	25.8184	24.8005	26.5982	26.8334	26.8329	26.0096	26.5076	25.94	25.6356	25.7792	25.4095	26.3609	26.4991	26.3843	25.8152	27.4041
EFS	24.4734	24.4148	19.0854	25.3524	22.256	23.0837	22.8744	24.1383	25.7137	25.7767	23.814	24.7613	25.3666	25.6497	23.6796	24.2809	24.9622	20.6127	26.3407	25.9684	20.5455	20.1848	18.6363	19.9652	23.4953	20.9581	23.773	20.2861	22.2317	20.0646	20.8277	20.4661	23.71	21.5536	21.3932	21.6015	23.5437	23.989	20.5211	20.3813	24.214	24.2832	25.4386	25.5932	24.2947	24.5441	21.5556	23.5862	24.1478
TGFI1	28.9352	29.1645	29.4449	27.0559	29.9088	28.3403	28.2252	28.0047	26.0582	25.9897	25.7263	24.789	25.5349	25.8784	26.162	27.5295	24.6719	24.2797	21.5857	21.1533	24.506	23.302	20.7286	24.3957	19.8739	25.305	26.9144	26.5411	27.0458	26.4173	26.4315	25.746	25.008	24.404	24.448	25.3141	22.5346	24.0972	23.5285	23.8783	23.6353	25.538	25.8063	27.4542	26.4998	26.8363	27.856	27.0696	23.8839
ADCY6	21.5302	21.0049	20.3627	19.4345	19.4173	21.9423	22.9491	23.1551	25.2314	24.9581	24.5984	25.6596	21.0297	24.7803	25.3152	23.4749	20.4719	20.257	23.4212	20.7191	22.066	23.4848	21.4748	20.2005	26.731	26.3194	20.558	23.9378	22.8096	24.6367	22.5964	21.3184	21.6453	24.3327	21.553	21.2085	23.4732	21.8593	23.9653	23.3958	24.7389	24.9646	24.8424	25.373	24.9907	25.1498	24.5741	24.4951	24.7705
MTSS1	20.6198	23.7988	21.7372	21.5859	20.0405	21.2262	22.6346	21.3574	22.7419	21.4139	20.9854	21.5142	21.6046	21.2603	21.3087	22.0278	22.4255	20.7861	21.3521	20.2488	22.1004	20.0924	21.9205	20.9891	22.6958	21.0266	21.3949	20.6521	19.7852	20.1532	21.9293	20.5405	20.8176	21.4187	20.5831	20.1322	21.439	20.9673	21.7901	21.1012	21.6384	23.9972	20.4566	22.3101	23.1666	24.2034	20.6684	22.7714	22.4792
VIP2	26.1794	26.8078	26.3467	27.1363	26.4193	25.447	24.9133	25.2966	26.3763	26.2312	22.6016	25.8172	25.8305	25.4404	25.0792	25.7266	24.4254	23.3033	23.3855	24.0852	20.7567	23.639	22.6598	23.394	24.6	24.9994	22.8125	24.3807	23.0888	24.7576	25.9106	22.9728	24.5801	23.3823	22.5146	20.7726	23.9317	25.3968	24.8139	25.4052	26.6099	26.8919	26.544	26.797	26.7473	27.3429	26.8539	26.4193	26.6034
MCA3	28.4814	22.8343	27.4502	26.9044	27.5278	27.1879	26.8016	22.922	22.5349	24.7626	26.6342	27.4134	27.1803	26.606	27.3277	26.4246	27.2581	27.2254	26.2352	26.0157	20.1662	28.2923	26.4197	20.9637	25.1812	24.8869	26.3956	22.8398	27.1514	26.3447	22.6281	24.3274	25.3946	25.5385	24.7945	25.0843	27.01	26.6223	26.2673	24.9293	27.2153	27.2375	26.918	27.2461	27.3744	27.4809	27.9331	27.9562	28.6897
RIPK2	30.6745	29.9356	30.7015	30.9779	29.9942	28.3967	31.1508	27.4829	22.3241	30.0201	28.8491	29.9449	28.6366	29.1989	28.9163	30.1439	29.6069	30.0375	30.4624	30.853	29.2105	28.8743	21.0822	29.3799	29.688	19.8344	19.1309	19.9783	30.3574	21.2183	32.2775	20.4654	20.7439	22.5573	19.8668	20.247	28.4907	22.4534	29.3988	21.4041	32.0028	29.1396	32.231	30.0947	20.6985	22.0354	30.7843	26.7442	32.5229
HNRPR	28.8673	28.7116	27.2285	26.8451	26.9555	25.8473	26.956	25.4542	28.3962	28.2159	27.4307	27.4571	28.6689	28.5205	28.7677	28.3187	29.7887	29.1027	28.5572	28.8545	30.0069	29.9628	28.8272	28.5795	30.3616	27.982	29.8019	29.5423	30.3094	29.0982	28.5275	29.7526	29.4476	27.8489	29.2326	29.222	29.9171	28.3588	30.4613	28.7461	29.7123	30.1413	30.545	30.1192	30.0322	30.2056	30.2227	30.2079	30.0619
TPD54	31.1874	31.1838	31.4388	30.8544	31.4068	29.6361	30.7227	30.1693	30.5227	30.6265	30.4811	28.8765	30.9414	30.7574	31.0689	29.1268	29.9366	28.8747	28.8268	28.7761	29.3812	30.0483	29.0284	29.6712	28.5643	29.9441	29.6145	26.6333	29.9512	26.2907	28.0152	28.9502	28.7181	27.4848	29.3543	26.3947	29.8642	29.2665	29.717	28.4187	30.0231	30.3438	29.8827	29.9814	28.9196	29.5867	29.2857	28.7386	30.0674
EMC8	20.7931	20.7646	23.6933	24.8363	24.7916	25.0274	24.9584	25.4664	25.8917	25.1746	25.0092	25.7539	25.744	25.9238	25.7414	25.4944	27.2969	21.736	22.9825	21.8664	22.435	27.205	19.9478	22.7167	26.5339	23.26	21.7098	22.4988	24.1283	24.2962	19.9339	20.4878	20.7659	26.2356	21.8471	24.9988	25.9281	25.775	25.091	21.3612	26.317	26.5948	26.3249	26.7528	26.9287	26.8123	26.8779	26.3482	26.8554
COCH	21.743	21.5137	20.5594	21.953	21.5168	21.2302	21.1372	27.4143	24.3488	20.6369	21.0016	25.5427	20.9552	21.2459	19.3629	25.2941	20.5945	20.8016	24.4827	24.0768	21.5027	21.727	26.1299	20.4904	28.1825	24.8128	20.027	24.3348	24.1765	26.5237	25.9478	25.702	24.7363	26.1956	25.9847	28.6967	20.4114	27.5499	21.3068	27.9408	25.1858	23.5382	21.9608	20.5563	22.0306	21.862	23.131	22.182	22.0385
ERI3	24.3482	23.3361	25.1596	25.0664	25.9348	27.1228	21.3215	25.3408	21.6168	21.4513	24.2708	24.016	21.1806	25.0182	24.4147	20.7675	21.6119	20.5682	21.4297	21.3615	19.9398	20.9573	20.0916	19.6879	23.8057	24.9071	24.5463	22.4884	24.2338	22.0102	24.1579	20.6907	25.3813	23.6363	21.1355	22.0072	21.6177	21.8388	24.6477	22.687	26.5699	26.3591	25.488	25.1505	26.7938	25.7814	26.6037	24.3749	26.611
SYNJ1	24.0091	23.822	23.192	20.7664	23.6787	23.1109	23.6565	21.3723	25.1033	24.2505	24.5495	23.8791	24.1948	24.6777	23.67	23.507	24.0454	24.8631	22.3168	23.3956	20.3922	25.2687	24.4008	21.2105	25.1092	24.6249	26.2012	25.4069	23.887	24.4336	25.4884	26.4711	25.6123	25.9388	25.5329	25.4001	24.67	24.6813	25.5012	25.1152	28.5586	28.3135	26.9597	24.7902	26.9676	26.7547	27.1207	27.3121	28.2818
FIBP	26.2248	26.6471	25.066	21.2519	25.2295	23.8658	20.8558	20.8713	26.1992	21.9435	25.7681	26.0445	24.8623	19.8021	24.8376	24.9648	30.1323	31.8858	24.3189	24.4133	23.4869	21.0729	25.7637	24.466	20.7388	27.0895	24.1824	23.7446	19.998	27.2295	20.9012	19.7533	20.9651	27.443	26.6505	21.1746	20.291	22.2262	24.4709	22.0051	28.4324	27.7148	27.3655	29.4429	27.8653	28.2205	28.3683	28.862	25.7526
IF4G3	27.2806	26.9644	27.4768	27.7958	27.8623	27.5493	26.3937	26.2239	22.9366	27.3648	25.69	26.0043	25.8469	26.1281	26.6599	26.3906	20.6403	23.9925	20.1437	22.7425	25.6746	20.5023	22.4936	19.8772	25.1822	25.42	23.7692	24.9896	24.5539	24.8386	24.1226	25.1538	22.2569	23.3624	23.1533	22.8481	26.6765	25.5501	25.31	24.6201	25.6676	26.4266	26.0503	26.1924	27.0831	26.7563	26.4179	26.4784	27.2381
E41L2	30.6005	30.3245	31.6774	31.3373	30.4427	30.4367	31.891	31.6873	30.289	30.9015	31.0852	30.294	31.8964	31.849	32.1913	30.4293	34.7571	34.5068	34.3826	34.4468	33.2422	32.8282	34.4767	34.8225	34.0559	34.6129	35.1114	34.8179	33.8078	33.6647	34.6914	35.4246	34.8203	34.2432	34.5546	33.0691	33.9029	32.4305	34.1137	32.9455	33.2855	33.2151	33.2061	33.2628	33.0233	33.0015	32.9332	32.9674	32.7111
LTOR5	28.506	28.1736	28.2919	27.6255	28.776	27.9343	28.3157	28.047	27.1522	27.5351	28.9864	28.6956	29.416	27.3816	28.8369	24.9192	27.2494	27.2833	26.0349	26.5665	25.7375	25.8269	25.9456	26.0828	20.2604	22.4084	19.2173	27.5326	25.7991	23.764	21.1768	27.3641	27.3961	20.5597	26.6189	20.9437	28.6382	25.8779	27.1731	26.761	27.77	27.2362	27.6043	27.1939	26.6621	26.6255	26.5658	26.5891	28.1691
B3GN1	20.4299	19.2443	21.1174	21.2573	22.2096	23.9739	21.4458	24.0671	24.3292	24.542	21.5855	24.9908	24.2582	24.7378	23.8542	24.6743	20.7669	21.21	21.1139	20.1452	21.0549	24.7058	21.7414	20.9554	24.99	25.7293	24.9322	22.5318	19.9684	20.9557	20.3014	20.3505	24.2429	25.4836	24.0237	24.5298	24.2269	25.3357	25.4023	23.9843	25.7884	26.1483	24.6937	22.0945	24.5059	24.8668	25.7584	25.3071	26.6857
WIPF1	26.7778	27.0059	23.4396	23.2704	23.9498	24.0261	25.0085	24.7351	25.9282	25.8287	27.8274	25.9773	26.5078	25.6292	26.5965	24.9145	25.3729	24.7106	23.629	24.2347	26.4561	26.7093	20.9645	20.297	21.279	24.2686	24.3845	24.6433	27.2109	25.092	25.7962	21.8898	20.8069	22.2052	25.8313	24.8755	26.1136	25.1173	27.6765	25.6325	26.8082	26.5931	26.9718	27.1066	27.1184	27.6447	27.4116	27.9109	26.0131
SGCE	19.5241	20.7049	20.9307	20.2947	24.5772	23.7333	22.966	20.8283	24.6037	23.6902	24.8815	24.7985	25.3342	25.4761	24.0919	23.6048	19.999	20.2225	20.3369	24.7582	20.6707	21.5786	25.7933	26.0798	26.0021	21.7863	27.2919	21.547	21.6643	26.993	25.56	25.7352	27.4869	27.8319	25.3167	22.4601	25.2415	26.5684	21.96	27.1637	21.9391	23.8581	20.6061	26.4842	20.5855	24.1169	23.2513	24.1455	21.4237
AKA10	24.3098	23.2087	21.0916	24.6931	21.048	20.8346	23.5145	21.197	21.5554	23.2757	20.6425	23.6181	20.995	19.9516	20.4723	23.983	21.7111	20.4001	21.0204	20.1141	20.3658	20.1774	21.4069	19.2363	20.6005	20.3167	20.0786	20.7288	19.9747	21.9468	21.5468	20.4097	20.5476	21.9015	20.507	22.046	22.4008	21.1441	21.6151	20.7464	23.976	23.6717	22.187	24.5563	21.6086	24.3759	20.2862	23.7173	20.7684
DENR	27.4068	26.6129	26.5928	27.6223	22.776	26.9864	27.246	23.6464	23.6711	25.2546	22.2919	26.9486	26.928	24.5039	25.7386	24.3682	25.61	23.6098	23.481	21.1906	20.5994	19.6745	22.8102	23.5768	21.4014	22.0775	26.9739	21.5807	22.3057	25.4257	25.4423	25.693	21.8568	20.4895	19.623	20.176	24.8484	20.693	25.994	24.77	27.515	27.5372	27.5782	26.9328	26.432	25.3166	26.8603	26.6125	27.557
XPOT	26.7819	26.6887	30.0198	29.1891	30.1979	28.4243	28.7993	27.1873	27.1235	27.3148	28.2399	27.8065	27.9828	27.4305	28.4577	27.8038	23.0262	23.5608	21.5095	20.8266	22.7426	21.5066	20.2291	22.0527	27.9445	26.9303	28.1852	25.2807	27.9451	27.2744	26.5592	27.983	28.3513	27.6034	27.101	26.2966	28.5969	27.6952	27.9777	27.6788	27.9181	28.2011	27.083	27.5368	28.54	28.6802	28.6448	28.8762	27.2893
DNPH1	26.0721	26.5521	28.3459	25.4164	28.1746	27.7785	25.7198	25.6947	27.2318	27.6575	28.2716	28.3077	28.5766	27.8539	27.7858	28.4152	26.2901	26.0641	22.7509	22.6304	26.1842	24.2153	25.8517	25.9879	26.3886	22.4312	27.4698	27.9996	25.3917	27.5366	24.8579	28.1095	27.6819	24.6211	26.2225	23.5453	27.6302	26.8644	27.1154	26.3314	26.5757	27.5641	27.3706	27.2252	27.7146	27.8129	28.3194	28.1663	27.5145
DCX	20.868	21.005	21.004	23.6211	20.1871	22.6418	20.4929	20.1698	20.6387	22.3931	20.8098	21.4037	19.3924	22.1671	24.0781	21.5082	20.7823	20.0035	20.6414	20.4315	20.705	19.9522	18.3566	20.6657	20.9406	21.3532	20.2612	21.3616	19.8738	20.5118	20.2047	19.5033	23.1946	21.5754	21.5402	25.8163	21.7347	21.6372	19.7165	20.5746	22.0921	22.4548	24.3981	24.4499	22.9536	23.9717	23.4292	24.0889	25.008
TIM44	27.3979	27.8745	28.474	26.1718	28.4848	27.2324	26.7834	27.467	27.8646	27.7826	28.3755	27.0035	28.4838	26.3056	28.6343	27.3413	25.2066	26.4519	24.1301	19.6389	27.0615	20.4022	26.3982	25.9949	28.8711	28.3886	24.988	22.3287	27.0551	27.1244	23.9134	25.9286	25.59	24.213	23.7031	23.6176	28.1786	27.7744	27.3733	26.1706	27.4375	26.8536	27.0346	26.5148	25.4506	26.6178	26.8059	27.3964	27.3204
TPPC3	27.3279	27.4488	27.2414	27.4499	28.13	27.7369	28.076	28.1992	28.0307	27.8321	28.4654	28.2768	28.6175	28.5472	27.7761	27.798	26.0206	21.3395	25.3853	28.9201	21.1172	21.1555	26.2102	28.5147	26.629	26.0633	26.1225	20.9083	23.6593	24.4262	23.0255	23.4704	27.132	26.4322	25.0412	26.3057	25.2784	26.171	25.6809	25.6055	26.0153	27.538	27.6495	27.7434	27.3871	27.6186	28.0939	27.7167	28.6129
CHM2A	24.9094	26.1291	27.579	26.9516	26.7923	26.1082	26.5962	26.2765	27.3225	26.2831	27.882	27.3365	26.8088	27.4077	26.8755	24.5302	27.1222	27.3532	25.6698	27.7634	26.7595	26.5054	26.7506	26.5235	25.4998	24.0431	26.1577	25.7911	26.4639	25.5099	24.1963	26.5321	27.5186	27.4805	25.1225	25.8179	26.1783	27.0679	27.0829	22.0198	27.529	27.6281	27.2625	27.7552	27.5856	26.8029	27.1354	27.3465	26.6894
NCK2	23.0341	25.302	24.6277	23.8844	23.9849	24.1435	23.6362	24.3507	26.1028	23.5725	26.3877	25.4453	27.2653	25.7275	26.2534	25.5559	20.5503	26.2739	26.0341	26.508	25.8748	20.3721	26.5822	20.7804	25.0393	25.9259	25.6074	21.0166	21.848	23.3998	20.912	21.8314	25.415	26.9944	21.2521	20.931	21.1294	23.7845	24.6446	24.8683	26.0253	24.8585	25.7118	25.2107	25.2906	25.0577	25.2208	25.5589	25.2682
PLRG1	22.6726	22.3271	21.9685	20.8951	20.8392	22.1832	19.5263	21.1515	25.1096	22.0186	24.189	24.5095	23.4344	23.6931	22.0038	23.7455	21.2226	25.502	22.5468	21.0747	19.0349	21.0613	21.5915	21.1057	26.6269	26.1907	24.3056	25.6505	25.5783	25.9704	19.9247	24.144	22.6149	24.5359	24.6311	24.6472	26.1339	26.6775	26.2217	25.6976	26.1014	24.7512	26.897	25.8872	25.7439	26.2407	26.4946	26.2794	24.473
RGS10	25.3557	26.5955	21.5073	23.4028	24.083	22.3312	24.0516	24.4968	23.9996	24.6344	26.1284	25.7124	25.9283	25.2031	28.0088	25.5475	27.3927	26.6432	26.8203	20.4668	26.0197	20.6791	20.1774	21.535	24.582	24.7605	20.4358	23.2792	21.0359	21.4569	21.2602	22.0407	22.4072	23.6102	19.5412	23.0094	20.615	24.3487	20.592	21.5117	26.3397	26.6371	25.9697	25.8706	26.7372	25.3469	27.032	27.1702	25.3825
BUB3	28.3992	28.3858	27.5002	27.6418	27.1462	27.495	27.6935	27.1162	28.2691	29.6615	28.164	27.4075	27.8478	26.9926	27.2472	27.7498	25.9621	25.0946	20.5711	20.8907	23.6423	25.1882	24.7807	19.9853	28.245	26.6327	26.252	25.0711	28.4535	28.3743	22.9595	26.72	27.8926	26.9043	26.184	26.6465	28.5167	26.5469	28.3183	27.4894	28.0325	28.071	28.5988	28.4675	28.2112	28.0535	28.0949	27.8472	28.6959
ACTN4	35.2096	35.229	35.655	35.2451	35.1555	35.071	35.6717	34.9187	33.641	33.1064	35.0032	33.8367	34.7127	34.4972	34.255	33.3893	33.5832	33.5294	32.5017	32.4403	33.1389	33.1593	32.8474	32.9039	33.5342	33.4626	33.6492	33.9166	33.6731	33.4421	33.2618	33.2932	33.6846	33.3994	32.9332	32.3007	33.8435	33.5803	33.615	33.6846	33.7224	33.8702	34.3303	34.2249	33.8741	34.0562	33.9477	33.9234	33.6116
GATC	21.3091	21.6349	23.1363	23.4786	23.5919	23.3964	22.2597	24.3331	24.0738	24.8045	24.8954	24.3296	23.9694	24.0051	24.2377	22.9991	20.1807	20.2947	20.4581	20.5531	24.6605	20.7133	20.4043	21.278	23.8942	20.0902	19.4578	21.4029	19.6199	21.5705	18.5479	19.4195	22.2903	21.1513	19.5861	20.9221	20.0954	21.0951	21.4237	25.0687	21.4877	21.3718	21.5127	22.9729	22.0761	20.5703	20.5757	22.7536	24.082
HTSF1	24.3403	20.8377	21.3111	21.3121	21.6106	19.8108	22.4384	21.4096	24.7944	25.3718	23.0176	24.0701	24.0188	20.2646	22.2696	24.0396	24.4516	21.2871	19.0277	21.775	21.1067	21.1232	21.1646	21.8708	22.5982	24.1703	21.8375	20.3222	22.988	24.099	21.7517	22.807	22.2487	21.4195	20.3123	23.6657	23.4663	24.7589	23.3514	24.8098	24.2108	23.7429	22.9179	26.1172	22.1343	22.1712	22.7897	23.1046	22.9134
CYH3	24.7724	24.2748	23.9615	24.6205	23.4805	22.1137	23.7341	24.7272	22.6628	23.0046	22.4299	24.6995	23.3949	22.934	22.7792	22.9375	21.317	22.6926	19.4531	20.7179	20.7248	20.7322	21.0695	22.6264	22.9571	21.0976	22.6438	22.9373	22.1204	24.3784	22.7407	19.4656	23.9009	23.368	22.0665	23.5212	22.8163	20.8365	23.0567	22.2627	21.0156	24.8251	20.8857	24.4708	24.1251	23.0674	24.3679	24.0025	20.779
AP1G1	27.6678	28.0416	29.7891	27.9911	29.0409	27.7399	28.336	27.2731	28.2484	27.7893	27.2805	26.5513	28.1109	27.1176	28.5371	28.0646	23.9176	22.5839	21.7701	20.8799	21.674	20.7967	22.8301	22.6643	28.2208	27.4785	26.5842	24.7459	26.4903	25.3214	26.6927	27.4061	25.162	26.2221	24.3215	25.2813	27.9611	27.5784	27.5098	26.9823	28.1917	28.0562	27.5721	27.4735	27.7118	27.758	27.9586	28.1616	27.1903
STX6	21.8131	20.2292	25.6648	25.2343	24.4509	24.8968	24.9316	24.9198	25.7245	23.9082	25.4634	25.7185	25.6835	25.7151	24.0868	24.5521	26.338	21.3535	24.685	21.0393	19.8928	26.0161	20.6838	25.5826	26.3933	23.8699	22.9374	25.7723	24.3235	26.3101	24.8044	20.2101	20.9907	23.2874	24.4366	24.3599	25.496	24.9983	21.4183	20.2799	24.8833	23.6923	24.8447	24.8072	24.1048	24.7117	24.2606	24.9837	24.7347
SNG1	21.2554	21.3849	20.7195	21.6149	20.8345	24.6287	22.2157	23.691	21.6161	20.8053	26.0415	26.1814	26.0689	26.2019	21.7281	26.3599	20.8851	25.7942	24.7161	25.3289	25.111	24.408	25.767	24.246	27.3577	23.9665	24.9449	25.4326	26.5045	23.6102	25.0195	27.1721	24.6785	24.705	24.1352	24.3982	26.0241	23.2863	19.7817	25.757	22.1478	20.7615	21.6612	24.7588	21.6718	23.7848	22.6668	26.4237	19.9812
SNG3	21.3603	23.41	19.2264	21.5779	21.7183	20.8063	21.711	22.6021	21.3985	21.7615	20.3789	20.4817	19.7843	24.2526	21.7796	21.8285	20.8646	20.7495	20.8075	22.4186	22.5275	21.9785	19.9101	20.0634	22.8562	23.8464	21.4728	19.7094	20.7493	20.7992	20.8517	21.1839	20.7425	22.3296	21.6852	20.8763	20.2748	21.8595	20.6684	21.8358	27.1561	25.1917	25.0224	25.0007	20.7542	21.5698	19.8081	25.2265	26.7455
ENSA	26.1975	26.2927	26.4185	22.3582	27.3251	24.1704	27.0006	24.5224	27.3555	24.0556	28.0707	25.3168	27.4775	25.6023	27.2693	27.0743	24.4713	24.2095	20.9161	24.8279	21.5267	19.4811	20.3778	19.9844	21.4809	21.004	25.2183	21.1037	27.23	25.7509	21.6518	26.9738	19.7625	26.4362	26.6518	24.8623	25.6799	25.6684	26.6979	26.164	27.3658	27.6155	26.1391	25.9743	27.3733	27.2658	26.6668	26.7814	27.1238
MCAT	25.6289	25.1684	27.5558	27.6748	26.3778	26.2957	27.0557	26.3873	24.0593	26.9109	27.1444	26.4175	26.6217	27.0432	26.9408	27.93	23.4312	19.5702	21.0715	21.4632	20.1855	20.8466	21.4355	20.9836	25.9162	26.3611	25.1961	24.2334	25.7163	26.3136	24.8454	25.4646	20.4933	26.8671	25.7646	20.4182	23.6247	25.6985	26.5831	26.5942	25.0469	26.3417	25.4155	25.8909	25.9599	25.7955	26.6277	25.9822	23.3267
SYNC	29.6415	30.2874	31.4065	30.3268	31.5822	31.1533	30.7272	29.8236	29.2716	28.9366	29.8127	28.9073	29.9693	29.3173	30.1651	28.8548	24.0956	26.9441	25.3603	25.146	21.6926	23.1663	22.1828	22.8052	29.7562	29.7266	27.9628	27.824	28.6794	28.109	27.5765	27.3467	28.739	27.7443	27.6791	27.1549	29.6465	28.7409	28.6266	28.0349	28.6512	28.7024	29.2128	28.5463	29.1805	29.2886	29.6067	29.6842	28.8329
MYO1B	31.5377	31.2625	32.3347	31.1142	31.0129	30.5548	31.9054	30.8464	27.6506	27.2266	26.9173	27.8491	29.5961	29.0176	30.0309	29.7452	28.9246	29.2086	28.9516	29.3444	26.2361	27.1179	29.2978	29.7251	30.8613	30.2266	30.7132	30.6919	30.1655	30.0755	30.2608	31.4891	29.8989	27.0687	30.0364	29.6148	30.1484	28.5963	30.3083	29.1459	26.7603	26.1832	27.5352	27.7865	27.2153	25.4922	28.4779	28.6845	27.9658
SSNA1	20.4968	20.6292	19.6294	19.0228	20.8662	23.2267	20.0063	22.1457	21.7381	20.2939	22.3473	20.5617	19.5583	21.3157	20.9871	21.4819	20.3917	21.1685	21.2244	19.6316	21.281	20.9561	20.6123	21.1325	20.3214	22.062	20.8351	21.8819	20.6445	21.8501	20.5151	19.599	21.4492	22.3527	21.712	20.2483	20.5586	21.6807	20.085	20.8136	20.4465	21.6455	22.415	21.9257	21.6272	20.8229	21.6744	21.7662	22.7233
STRN	28.4025	28.3328	28.2637	27.9161	28.1891	27.4654	27.7435	27.2042	27.8931	27.6459	27.164	27.7567	28.2479	27.5201	27.0366	27.7227	25.7747	27.1189	25.6572	24.7255	26.0107	24.7419	22.4735	25.7311	27.2908	27.4661	27.5875	26.1678	26.9247	27.4383	27.1911	26.9203	23.1967	27.1007	24.4949	23.7219	27.8677	27.0904	27.1673	26.4225	27.9346	27.9328	27.6768	28.2187	27.7686	27.654	28.1241	27.6397	28.3637
U3IP2	25.013	24.9805	21.051	22.1944	20.7844	22.7644	23.2706	26.2878	25.5621	25.3465	22.4877	22.3923	23.5169	21.9268	20.8368	24.7449	20.2783	20.0169	22.5477	19.9326	24.0942	22.601	20.4973	20.9672	25.2187	23.3092	24.5345	22.2871	22.7125	25.3051	23.3023	21.6178	19.8935	21.4828	20.7681	21.8541	25.3128	21.265	24.0574	22.199	25.3519	23.6646	21.3951	20.0945	23.0057	24.7037	21.5573	24.2861	24.8635
GTPB6	22.0099	25.5797	25.8152	26.8899	24.1091	26.3925	24.7067	20.3593	26.7514	26.225	26.1522	24.4744	24.2924	23.128	21.5264	24.5539	20.8472	21.9295	24.4326	24.0001	21.9964	19.9055	21.9951	20.368	19.3174	21.5854	21.1908	21.6168	24.802	21.6754	22.0624	20.5915	25.5837	21.5663	20.7958	22.3891	21.2332	24.6671	23.7586	21.3953	19.2714	22.5324	20.3486	20.9389	25.9792	22.3797	26.382	26.6084	27.2184
NRDC	29.4566	29.1463	28.6846	27.1375	27.0351	26.2404	26.2488	26.4333	25.601	24.7617	27.2348	25.4316	28.3071	26.111	27.0198	26.5698	21.3309	23.0234	24.2144	20.7932	21.0128	25.6699	23.1088	19.5116	26.208	24.4964	23.1405	24.3395	25.9022	26.4289	24.0669	21.9839	20.9521	25.0261	21.9248	24.1779	26.3749	24.7112	24.8605	23.1414	26.0281	24.7993	23.2327	23.2945	25.9006	25.7669	23.7688	25.5034	26.6432
EDIL3	22.6305	23.1661	27.0177	25.4794	29.09	27.7242	24.7388	23.5805	26.0545	23.8499	29.3058	28.444	29.5154	26.5379	27.488	27.2532	23.7811	20.6798	25.2139	20.7289	27.9724	27.8789	25.111	24.1458	29.1839	29.1334	22.563	23.9743	27.8577	25.9536	23.5377	24.4645	19.7893	23.4951	22.7835	22.1705	28.853	27.8439	29.2536	28.1381	22.74	20.1499	23.1514	20.9784	23.6933	24.4131	22.8907	21.7207	21.9498
SAHH2	29.4225	29.3466	30.1168	29.8943	30.0692	29.1345	30.0125	29.9153	28.7138	29.3916	29.2898	29.3479	30.1493	30.0893	29.3802	29.6334	27.9346	28.3148	27.8775	26.9622	27.5866	27.7355	27.4959	27.9924	28.2381	27.2485	29.2489	28.8614	28.8997	28.3345	26.9214	29.2754	29.0063	26.9998	27.5648	28.4445	29.3132	26.7182	28.9899	28.9801	29.8705	29.7704	30.0657	29.8463	29.9666	30.0549	29.775	29.5956	29.9043
RAD21	24.8511	21.572	23.7607	23.7874	21.0753	22.3073	21.6344	20.775	24.8876	25.5853	22.7457	24.3344	21.2203	20.606	21.2783	20.7286	26.7216	27.5384	26.8316	25.3197	26.0319	24.8367	26.5983	26.339	24.9832	26.4459	25.3389	24.9577	24.506	25.2546	26.6836	23.935	26.8633	26.4652	25.3017	22.6729	25.8044	25.9356	24.7142	24.3743	27.1004	24.3312	27.9424	27.952	27.8424	28.018	27.4535	28.659	26.473
TIM8A	26.5269	26.6756	26.2076	25.6072	26.1583	26.2165	25.7195	26.5331	27.2349	22.9073	26.2645	26.4869	25.6295	26.3259	25.6534	25.0801	26.1319	26.5481	20.9266	25.9633	26.2112	26.2947	25.8579	25.8856	19.5475	20.5139	20.986	25.3756	25.0997	25.5074	25.5377	20.4259	20.6886	25.9754	19.6358	25.712	26.0399	26.9108	25.7557	25.989	26.1854	26.3737	26.1703	25.9515	25.5907	25.635	26.3754	25.4016	25.8418
DHX16	23.597	24.6752	24.2345	24.1246	22.6736	22.0964	26.9757	24.0729	29.6327	24.2361	22.3876	24.2438	22.8262	21.8926	23.3022	24.9614	23.8467	25.446	22.8276	22.9974	22.0341	20.2712	27.4504	22.8203	23.7944	21.8721	23.6234	25.9115	21.7252	23.6067	21.4663	23.7512	22.9008	23.8388	23.6186	22.4668	24.8123	24.1931	24.1577	22.4715	22.5604	22.5488	22.491	21.0126	21.7837	23.196	22.4664	22.0089	22.0582
SSA27	24.6367	24.0812	25.9279	25.4227	26.239	25.7714	25.2914	25.7655	20.2209	25.9956	25.5067	25.6794	26.432	24.9322	25.3241	25.7434	22.9224	22.3736	22.7012	20.9024	21.1286	20.1957	19.903	20.8686	21.825	21.7677	23.1839	20.3258	24.8814	23.2324	20.6737	21.6905	21.1012	20.5707	20.4918	21.0212	25.6198	24.2782	24.7117	24.4173	25.3079	25.8942	25.6843	25.6229	25.7629	25.3912	25.1179	25.7629	25.9713
GMFG	21.3387	23.0854	20.5475	21.4074	21.243	20.932	22.8596	22.7243	24.1097	21.7057	20.9291	21.1226	21.7509	20.6857	20.1259	20.1739	23.5801	24.3019	20.2368	21.5701	21.7779	21.1502	23.4928	24.292	22.2123	21.8105	20.4852	20.6468	20.0949	20.4017	22.5448	19.5165	22.4189	21.3054	21.5448	21.3429	20.3078	21.805	22.252	21.3478	24.8739	25.4595	26.052	26.2716	25.5936	25.8039	26.5983	26.0665	24.612
BAI3	21.5781	20.4279	20.8177	22.3134	19.6463	19.8754	20.8559	21.1346	26.7266	25.3949	20.3481	23.0145	22.0709	21.0712	20.5609	21.28	25.9568	25.8208	25.7337	25.6767	19.7305	22.0352	21.2964	19.9349	20.8657	21.798	19.5952	21.199	21.5346	21.7812	21.4591	21.4739	19.8125	22.3319	21.6879	22.2373	21.3688	23.6543	20.9137	21.7159	25.5068	26.0016	25.4829	25.1968	21.7785	25.793	24.5938	24.3719	21.0812
KPRB	25.733	24.7379	25.4171	24.3768	25.2515	24.4338	22.0762	21.7225	26.8954	27.0252	24.1077	24.2753	25.1069	25.5874	25.9373	24.8554	21.2514	21.1701	22.5856	23.3851	20.4074	21.7803	21.443	20.5827	26.3347	25.634	27.5448	21.9941	23.3458	24.6234	24.8898	25.219	25.5272	26.6024	22.8524	23.0234	23.5673	24.7608	24.102	25.6846	25.8558	25.3438	24.4438	24.4643	26.3685	26.4272	26.489	26.6508	24.9253
SMCA5	21.0917	22.4723	24.0329	20.2822	19.9478	23.1139	20.2955	23.016	26.0312	24.4364	22.0971	24.2134	25.2843	23.216	22.501	25.6515	24.5123	23.9969	22.2224	21.5628	24.7419	24.6912	23.46	23.6476	27.6736	26.1705	23.5024	23.5437	28.5699	26.6022	24.5194	23.5063	24.9573	25.7418	24.27	25.4563	27.8746	26.1151	26.867	26.5822	23.9527	24.9463	27.244	26.7027	25.7325	26.7758	25.6072	26.2792	25.9349
K0513	21.5966	23.2739	24.0535	20.6381	20.7623	20.731	21.4658	21.924	25.5941	22.196	22.4809	26.3971	20.6763	24.1171	20.5912	20.5019	21.1257	23.4439	25.2874	25.9035	25.1987	23.1349	22.0145	20.7236	21.2061	23.4651	21.0316	20.9105	20.4485	22.6255	21.4474	21.6205	20.674	21.3438	20.5366	22.5566	20.327	24.4512	20.6849	21.0463	25.67	25.748	23.3362	25.2935	23.1005	24.4973	24.8912	23.357	26.2758
JIP4	28.8781	29.9885	28.4006	27.9519	28.9685	27.7329	29.5982	29.5683	26.5148	28.4245	31.2947	30.3953	30.5088	29.2556	30.0397	28.903	25.5116	25.4867	23.7782	22.1001	25.0175	26.896	23.3844	22.855	29.3028	28.2148	24.3187	25.7338	29.5972	26.9747	27.4772	27.8213	28.3727	27.3023	28.3009	26.4139	28.634	26.5133	28.3056	27.6505	27.0714	28.7064	28.4634	28.5848	28.6403	28.7623	27.5639	28.1712	26.9688
KIF5C	22.6762	20.1009	27.6899	26.0796	26.128	24.7429	25.0047	20.5859	22.9802	22.2481	23.1265	22.3305	21.2736	20.6934	22.1905	24.3693	22.9665	21.5108	24.905	26.5712	24.6886	23.4486	25.3173	25.6702	24.2914	24.4252	28.6036	27.2135	25.49	24.9778	26.2921	28.7836	27.919	26.0662	28.4374	27.16	25.38	24.9983	26.2293	23.9106	29.1157	29.2832	26.5517	27.8362	28.7003	28.9218	28.8955	28.7007	29.45
OPA1	27.6285	27.5122	28.4629	27.6193	28.2104	27.372	27.4168	25.7781	28.0479	26.8132	29.4626	28.1	28.9867	28.6413	28.7775	28.1148	24.558	26.5641	25.5069	25.0632	24.527	22.9425	26.2276	26.8716	29.5856	27.9309	29.2038	29.1351	29.107	28.2266	27.74	29.9441	27.7609	24.6925	27.9174	26.0146	29.7024	28.0724	28.4182	27.5861	29.24	29.1785	28.7137	29.0926	28.9729	28.7923	29.6503	29.7787	28.8036
PI51C	22.7043	20.4614	21.6638	21.7724	25.1391	21.5286	19.1706	24.8158	24.3971	24.2676	21.6053	24.1741	24.8731	24.2029	25.3864	23.6788	24.5525	24.2183	23.9703	24.0206	24.4892	24.5429	25.1287	25.0336	24.9424	25.5836	24.7878	25.7687	19.5434	22.3554	24.1623	23.7196	21.0312	25.232	23.7441	22.9747	24.2832	24.6083	23.512	21.103	24.2022	25.999	22.6624	25.1362	25.5391	26.064	25.5765	25.2859	26.0553
KIF1B	24.2568	19.7343	24.879	24.004	24.8191	21.8915	24.5039	24.5677	25.4614	24.4559	19.2686	23.7886	25.2501	24.2304	24.555	25.4682	25.9529	25.8293	21.7727	19.9713	22.0045	20.234	20.1959	19.0982	20.6453	23.9406	21.2679	20.4913	21.849	23.2577	20.471	19.7981	20.6116	22.2037	19.7177	21.7208	25.1204	23.3203	21.3107	23.335	24.2471	21.2006	22.8264	21.6684	23.8896	21.5383	21.1234	20.3819	21.7447
TBCD4	24.1216	24.8962	24.9239	25.4283	22.9627	24.5908	25.4691	24.6955	24.0348	25.2266	25.2839	24.7945	23.2772	24.0661	24.7679	21.7038	21.5508	23.9253	19.7139	26.5554	20.4417	24.5308	21.1592	18.7222	19.679	22.2361	24.9452	20.3988	22.9597	25.1894	24.1294	23.5883	24.1646	24.0945	23.8819	24.6834	24.4339	21.0849	23.8849	24.8872	24.6843	25.4351	25.808	25.5159	24.4737	25.5278	25.4251	24.2583	24.9565
DFNA5	24.4677	23.3692	26.8522	25.6872	28.3207	27.2197	25.8751	26.13	25.8198	25.8212	27.6011	26.3989	26.7206	25.1524	27.7303	24.7299	25.1753	22.9619	22.9031	20.8841	23.433	22.6813	19.6792	19.7527	24.1416	26.0345	22.7567	22.542	24.0073	24.9597	24.3721	24.2646	22.6808	23.6553	24.1604	26.1714	23.8868	23.2716	23.6127	24.591	26.9961	28.2838	26.7742	26.2139	27.8126	26.944	27.2589	27.955	28.5498
LY75	22.3529	21.7091	19.283	20.2866	22.7259	21.1833	20.1125	23.8999	24.4987	25.3125	20.2527	24.2745	23.4446	24.2188	19.2696	21.5801	21.9503	19.6245	20.2677	19.8828	18.9055	22.0057	21.1434	21.303	21.0537	20.022	20.2299	21.2129	21.4956	20.4689	20.7993	21.4673	25.0375	22.3836	24.4682	24.4692	21.3723	22.2272	23.4962	24.235	24.5526	25.8396	24.0493	23.6483	24.0417	24.0265	25.744	26.0623	23.2928
MA1A2	22.6159	20.0702	21.6063	21.9605	21.0911	23.1123	20.8972	20.1067	20.0382	20.3511	21.4466	20.7256	21.4255	19.9268	22.0265	22.0883	21.569	21.2746	19.5785	20.196	20.6269	20.1484	20.5658	20.4751	21.5127	22.8471	21.1527	21.2992	20.8778	19.596	20.7577	19.4055	22.7381	22.2684	20.9868	21.6805	20.6195	21.9391	20.4409	20.9556	21.2613	21.4038	21.5504	22.3361	21.6626	22.7203	23.4456	23.4536	21.9539
ACSL4	28.4159	28.4241	26.9882	26.2045	26.5691	26.1575	26.3237	26.188	27.6051	26.153	26.3362	27.0652	27.7517	27.0455	27.9362	28.0356	25.9566	25.7732	19.7017	20.6618	22.2805	25.9159	19.7401	26.236	27.5027	28.6392	26.5463	24.9865	28.2061	28.0971	21.1917	26.2643	26.0079	22.0101	26.7735	26.8696	28.1496	27.0975	28.0518	27.9747	27.4297	27.2379	24.6154	25.5316	27.6852	27.448	27.8777	28.1571	28.0645
SNX3	29.4754	29.6815	29.5745	27.5177	29.9176	27.4236	29.7264	28.8523	29.2593	29.0115	30.0779	27.0523	30.1065	26.6528	29.8987	29.9943	26.8236	27.4092	28.0343	27.3039	28.5924	28.4779	27.9298	28.2432	27.6689	25.2323	28.2818	26.8939	28.2837	27.9027	26.5712	28.1387	28.3885	27.3026	28.1931	28.663	29.2024	29.933	29.3097	26.9345	29.1653	29.3656	28.9727	28.8289	28.9469	28.9812	28.6661	28.4006	29.1935
STX10	24.5922	25.4128	23.1844	25.3714	24.9951	21.8277	26.0064	24.6004	21.7275	22.7215	25.4795	25.5187	24.9595	25.2723	24.929	25.5348	19.4933	22.3516	20.9997	18.6164	20.7027	20.7672	20.9832	20.5459	24.3047	24.9049	22.9164	23.7236	23.8878	24.0723	21.3823	26.3707	22.804	22.5707	24.6494	23.4211	24.9382	25.3233	24.9911	23.9632	25.1551	24.9421	25.1127	25.2459	25.2038	25.1382	25.3398	25.2456	24.9374
NCOAT	26.3292	25.8441	26.2361	25.404	26.0374	25.9329	27.2515	26.8911	25.8137	25.4176	26.94	27.039	25.277	25.405	25.5568	25.767	23.4301	23.0899	25.5876	20.3865	21.9446	20.5457	23.9412	20.3031	21.2353	25.3832	23.0139	24.3003	23.9601	28.3607	25.0371	23.9235	22.1275	26.9707	24.728	26.9142	24.7116	23.082	19.7097	25.2608	26.3787	26.3339	26.438	26.2851	26.0584	25.8199	26.5952	25.1593	26.9597
VINEX	26.8933	26.5005	28.4192	27.8785	28.5053	28.2858	28.011	28.3419	26.5097	26.3643	26.7424	27.4074	26.6366	27.0677	26.4373	25.9254	25.6435	26.0968	24.9993	23.2942	26.6853	26.7727	27.9444	24.2428	25.204	24.6663	28.8733	28.3073	26.2006	26.1677	27.4276	28.6394	28.4545	28.5064	27.3906	26.2998	27.4748	26.95	26.1751	27.2312	27.5649	27.0635	29.0156	28.6476	27.9448	28.1219	28.2149	28.2756	28.2358
HNRPQ	31.5054	31.365	31.2163	30.9528	31.1667	31.0407	31.1303	31.0424	30.4058	29.17	31.0623	31.5203	31.2235	31.5234	31.2197	30.7173	30.7913	30.9963	29.7955	28.5127	31.1256	29.6227	29.956	30.5632	30.9998	31.5699	30.2606	30.0572	31.4973	31.1837	30.1812	30.4503	30.8814	30.4946	30.0132	29.746	31.7507	30.986	31.6201	30.7112	31.183	31.1184	31.3662	31.5212	31.2143	31.0655	31.1084	31.3064	31.4325
RNBP6	22.5179	23.9348	23.6834	22.933	24.8905	22.5638	18.95	24.1649	23.4598	24.564	25.5905	22.438	23.5341	23.2804	21.9392	25.243	19.6121	22.3383	20.4155	22.1315	24.8735	22.2802	23.0226	21.1206	21.5601	25.4977	21.6263	23.3415	20.2182	22.7549	21.7142	23.2616	26.1228	22.6519	21.9661	20.2031	20.5685	22.7638	25.157	20.8512	22.977	22.978	23.2067	22.9339	22.7912	22.9973	24.9578	25.1281	23.1756
PLOD3	28.4639	28.9781	29.5348	28.7558	29.3481	28.8079	29.6632	29.2429	27.3738	26.7506	27.9161	28.0939	28.1226	28.0362	27.3273	27.3911	26.7279	23.4386	22.5795	27.7895	26.0874	26.8667	30.0781	27.1791	28.6126	28.5365	25.6211	22.7326	28.5102	27.6587	24.9041	22.1896	20.9923	26.3636	20.232	26.464	27.009	27.1491	27.6996	27.0595	28.1197	27.7834	27.257	27.458	27.2203	26.8416	28.278	27.6751	28.8667
GFRA3	20.5783	20.4732	20.2538	19.7856	19.1312	19.6073	21.0638	19.6486	25.2432	23.9283	28.5143	26.2541	29.3815	26.8846	28.6758	26.1076	23.7977	22.2519	20.6729	21.6539	23.0757	21.9212	22.0213	23.1431	27.4101	25.3438	28.7599	23.8311	25.0861	25.3339	26.1267	28.6181	29.5152	27.5077	29.8007	26.2973	28.9152	26.2389	29.0857	23.3543	30.8536	30.3288	29.24	29.0776	30.0079	30.1772	30.1612	30.0549	29.5434
DIAP1	26.3879	27.8518	28.9088	27.2871	29.3313	27.9735	27.8177	26.7899	24.9266	25.3989	27.3813	27.0916	27.7848	25.0369	27.6736	26.8312	23.71	23.0622	24.1868	22.1916	23.4789	25.6109	28.244	19.7076	26.2315	26.0748	24.1179	24.97	25.7922	26.261	24.6341	24.37	26.6676	26.2538	26.7972	24.6022	27.8313	25.5041	26.5426	25.1673	27.2327	27.9695	28.8476	28.8582	28.7869	27.9808	29.2368	28.7875	26.9649
2015-09-01	23.4788	25.582	23.4879	25.6748	25.1966	25.0879	25.3941	22.6148	26.7427	21.0548	24.2486	23.7772	19.9683	23.0519	27.535	24.6775	23.6006	23.7186	23.4947	23.4588	22.5236	21.6161	23.3351	23.0535	20.4494	23.7706	21.2018	20.2797	21.024	25.1672	21.1273	20.4991	21.2948	21.713	21.973	23.1672	24.0098	23.4989	22.331	22.1158	25.4632	25.5417	26.2837	25.8144	25.7322	25.4258	25.7976	25.7706	23.8729
TSN3	22.7838	23.5865	23.5875	24.0338	20.3128	24.4191	21.4917	21.2237	22.0319	23.9134	24.4389	24.014	20.8328	21.3176	25.9315	25.5505	21.7889	22.2371	20.6591	20.4863	20.724	19.9744	22.0226	21.419	21.1301	22.9156	20.0117	20.5078	20.5388	21.4995	21.9591	20.8731	21.1441	22.6463	21.3095	20.1696	22.1106	23.5999	21.9959	22.0572	22.8258	22.0941	20.9574	22.2891	23.4985	21.6006	21.5322	23.9788	21.6978
AP180	22.8178	21.1042	21.9154	20.4333	21.7167	21.2009	22.7336	21.494	23.6344	24.2301	21.725	20.8224	20.7441	20.5379	22.7351	20.9208	25.0197	24.6286	24.3647	26.4389	20.4907	21.4553	27.2716	27.078	22.8449	23.812	26.2765	25.7716	23.4321	24.0488	26.0465	26.8056	26.6713	26.5455	24.8413	24.3303	23.8937	24.5271	24.4262	24.1872	29.0268	28.0017	27.582	27.2882	26.9237	26.6438	27.2396	27.2058	27.1338
PDE8A	24.941	23.7701	24.5255	24.5207	24.6385	24.8547	25.3806	20.9098	24.4875	24.7615	23.4399	21.604	23.9129	21.158	22.7116	21.9435	23.7122	23.456	22.2723	22.0308	23.2398	23.5594	22.4078	22.7931	23.2864	21.0322	19.9658	20.6225	20.6548	21.2479	21.2484	22.0028	22.253	20.8209	20.8644	22.3219	22.5638	23.1832	21.9304	20.9891	23.238	24.0279	23.682	23.7635	24.0455	23.7264	23.471	23.7059	23.1459
IMA7	28.8479	28.9154	29.0684	28.2114	28.7175	28.3471	28.1816	26.5955	28.0212	27.9665	28.3792	28.7166	28.5363	27.864	28.3682	27.3192	26.1391	28.1957	24.507	25.7116	23.8346	23.9052	25.5777	24.9774	28.079	26.5941	28.2353	28.0688	27.4743	26.068	26.9478	27.2771	25.9815	25.3817	25.2599	27.4067	28.3259	27.111	27.7085	27.518	27.1033	28.3916	27.9281	28.2679	28.3593	27.8601	28.2294	27.398	28.1123
ICMT	22.1967	22.2666	25.8827	25.0791	24.6489	21.0798	23.7598	24.4636	20.8311	21.2946	19.1157	21.8129	22.7019	21.6364	23.1947	21.8338	21.8555	21.1903	19.9423	20.7003	20.932	19.7533	22.2996	21.6239	20.2543	20.7385	20.3168	21.2475	19.5685	19.5866	22.5459	20.61	20.8859	19.8996	20.6888	22.1189	23.0068	23.1901	22.0531	23.5558	22.6375	24.6867	24.6479	24.6083	25.1418	25.1015	24.4876	24.832	25.3915
SNX2	29.554	29.6574	29.8349	29.6835	29.7148	29.2011	29.0214	29.4081	29.3327	28.0434	30.395	27.8558	30.4856	29.9245	30.2955	28.5776	28.4108	27.4682	28.0953	27.9292	27.5051	28.0505	28.4972	28.8714	28.0623	27.5912	29.6635	28.8271	29.5792	28.9094	28.2793	29.3772	29.4124	27.693	29.0491	27.9468	29.0518	28.7882	29.2422	28.1379	29.9394	29.9471	29.7733	29.4132	29.9134	29.8382	29.7985	29.5973	29.5281
DPM1	23.297	24.7329	26.9154	25.8113	25.5688	25.9035	23.2717	24.6152	23.3433	25.7376	20.4956	23.8186	24.1642	22.5286	24.0917	23.7359	26.3308	20.8436	22.33	21.7995	22.8235	22.485	22.3431	23.6971	21.6228	24.328	18.3765	21.5777	23.1166	24.1999	22.4718	19.8154	23.2502	24.2764	22.7279	22.3636	22.9628	21.5402	23.5045	21.9783	25.3926	25.014	24.6388	25.478	26.0409	25.8255	26.0279	25.5927	23.4876
USO1	30.8351	30.7406	31.2172	30.3076	31.2213	31.2014	31.3485	30.3155	28.8187	30.0427	30.857	29.8685	30.7846	30.079	31.1079	30.5319	29.0356	29.2217	26.1769	26.9646	27.8539	28.1415	25.1591	26.6804	30.8053	29.654	29.2428	28.9774	29.786	29.3198	28.6354	29.189	28.889	28.8804	28.6042	28.6675	29.941	29.84	29.7292	28.6534	29.1737	29.4685	29.3608	29.447	28.5564	28.5475	29.4676	29.2354	29.7265
RT14	24.0659	23.9706	24.4406	21.4629	22.8794	23.047	22.0614	20.6427	24.7429	21.5083	19.5512	24.1546	21.8231	21.9101	21.1987	22.887	21.3843	22.3363	20.694	20.8845	22.001	20.8955	19.3416	20.9268	19.2613	20.9098	20.8218	21.1195	20.7479	20.2916	20.4344	20.5962	20.1059	21.3169	21.3416	22.3112	20.493	21.0381	21.7092	21.6559	23.2975	23.7077	21.1043	20.112	23.5187	23.6445	24.2013	24.2429	25.2467
TOM1	27.7633	27.8452	28.0731	26.2243	28.2622	27.7582	28.166	26.7132	27.4469	26.7036	28.3226	27.7471	29.0273	28.1465	29.3373	28.2459	24.9478	24.808	24.1249	19.6584	25.702	25.7786	23.0604	20.9905	22.0787	23.9146	25.4978	24.8057	26.7954	24.8148	22.1573	22.7942	24.5961	23.9699	25.7225	22.5342	27.2079	22.5249	26.6574	23.9149	28.7351	28.7254	28.4016	28.4245	28.2103	28.0469	28.083	28.175	28.7403
H2B1L	30.7295	30.9073	29.1226	25.004	28.3621	27.4777	24.1453	23.0586	29.4083	30.3154	22.672	27.6142	32.0298	32.3949	30.7278	29.167	35.4456	34.0394	35.0829	33.2306	35.0025	35.2324	35.6155	35.421	34.8365	29.4672	34.493	25.0136	34.1174	30.1279	33.7433	34.1484	34.1031	27.041	35.212	30.4812	33.5632	27.7842	34.6603	28.43	34.3949	34.5708	35.4318	35.2231	35.6007	35.5381	35.1499	34.8718	34.1865
CCD22	26.4291	27.194	27.4384	26.2896	27.7067	26.973	25.3493	25.1432	24.5088	24.5803	26.1784	26.6067	27.832	26.0558	27.5133	26.4657	23.1464	24.4131	23.3365	25.1052	22.1767	21.2061	20.7133	25.4335	25.305	23.5427	23.12	25.4135	25.6438	25.7107	25.1286	25.099	26.0334	25.703	23.1492	24.8539	25.1283	25.7565	26.9661	24.8375	26.1763	27.0185	26.1259	27.0232	27.1838	27.0019	27.6346	27.6541	26.514
PQBP1	24.0952	24.206	22.916	20.9929	19.2868	19.4755	23.9491	23.6157	20.9637	23.2151	20.7587	23.3839	21.0735	21.817	20.9727	23.5392	22.2749	23.8129	22.2031	21.3486	19.9188	23.0209	18.9791	20.4602	20.5332	21.0132	20.917	23.0004	21.5808	18.1765	20.9789	21.068	20.8723	20.5536	18.8539	20.1165	23.1874	23.2363	23.0359	21.7744	24.8884	24.8235	24.8603	25.1026	24.4327	22.5257	21.654	21.7512	24.1359
PRAF2	26.5466	27.9683	28.3569	27.7509	28.8266	27.6464	27.8983	26.347	26.1679	27.3476	26.0475	26.3157	26.7964	26.5572	27.3081	25.5281	27.258	27.1769	25.4901	19.3425	27.237	22.0022	19.9725	23.5866	28.7106	24.303	26.266	27.8346	26.5178	21.1494	21.8444	21.2655	20.3817	21.2906	19.6665	24.4133	25.0009	23.6606	21.2811	21.3804	27.0597	27.6964	29.376	28.3538	29.0165	29.245	30.1383	29.6011	29.4711
DKC1	24.6449	24.3822	20.693	26.7492	19.1382	20.9131	19.9077	21.9427	23.9458	24.7633	20.2975	23.1155	20.8	21.7417	21.5076	22.476	26.6143	26.5184	25.2694	24.4879	25.2184	25.134	25.9179	25.7248	27.4576	26.4097	24.5589	25.1666	26.2723	25.8923	21.1071	24.2362	25.2148	25.0294	25.4012	23.5673	26.1017	25.917	26.5467	26.5049	26.0273	26.0305	26.6176	26.6632	25.8462	26.1514	26.7438	26.6461	25.5753
EDF1	28.5332	28.3543	28.4043	26.3456	28.2132	26.7428	28.6101	26.5652	25.8348	28.4343	26.8299	26.6518	26.6113	25.2384	26.91	27.9163	27.7659	27.939	25.9543	25.9182	25.4455	25.1293	27.2696	25.9268	25.791	25.9633	27.4503	27.1123	28.0231	27.0026	27.1844	26.1587	26.5369	27.3917	26.1745	26.7234	27.9253	24.755	27.7686	27.8772	28.1056	28.5891	27.9439	28.3763	27.8872	28.2618	28.0813	27.8317	28.4594
CUTA	25.6464	26.1703	28.4668	27.5026	28.3903	27.3323	25.6943	24.904	26.8454	22.0288	28.0689	23.7573	28.0675	25.4102	30.1402	22.8946	21.9862	24.4623	24.0855	20.8314	21.8905	19.9313	21.7602	20.6695	25.6328	26.6238	27.4785	27.105	27.0589	26.5133	24.4583	23.9902	27.2691	27.2243	25.3612	23.8889	28.5026	27.4226	27.7598	27.0069	28.1482	28.6371	28.2517	28.2833	27.9495	28.1684	28.6516	28.7261	27.5657
PP1RB	21.979	21.3701	21.5559	26.237	24.7389	25.1957	23.4664	25.8702	24.874	25.322	25.5526	26.4638	22.4618	21.793	25.2871	26.6457	22.3079	22.3883	21.2385	22.089	21.3472	19.6258	20.5031	20.0829	23.8066	20.0444	23.603	24.6322	23.9741	20.9598	20.2425	21.8717	23.3464	24.2895	22.2235	21.3796	24.7089	21.6233	20.5845	18.0624	26.6283	26.4756	26.1096	25.7257	24.9237	21.0372	21.9709	20.7611	26.6589
NBN	25.4462	22.7266	20.1613	23.0819	20.9312	21.5543	21.7163	20.9726	24.4373	24.5052	22.3752	22.9372	23.6286	23.9917	22.0821	23.0832	23.0406	25.61	24.1632	25.0481	22.2825	24.6119	24.1654	24.4879	20.1888	21.4114	22.7831	20.6639	24.0762	22.4063	23.5019	22.1371	24.5798	24.6356	23.9317	24.0102	22.8099	21.2961	22.6868	21.3901	20.7085	21.9813	21.393	22.4916	21.3959	23.1577	22.2766	22.455	21.1909
NOL3	23.0847	20.3721	23.0482	22.9508	22.9434	23.2864	23.1588	23.1998	25.7431	21.7312	24.6759	24.3472	24.5278	23.2828	24.6562	24.3007	23.9041	23.5168	20.8992	23.7598	20.4872	20.3713	19.7494	23.3757	22.8972	19.7654	19.7908	21.5776	21.3027	22.3856	24.7679	22.9155	24.991	23.9062	21.8599	22.7886	26.0521	24.5466	24.0784	23.9047	25.0816	25.2479	25.0362	24.7066	25.2083	24.7937	24.5264	24.0414	24.4697
PLXA2	21.1129	21.3677	21.4718	21.2082	20.9553	21.292	20.4964	21.0472	28.0271	27.732	28.7693	29.6665	20.2091	21.7444	19.559	29.3777	26.0876	28.1932	21.9537	20.4017	28.1926	28.1235	20.9021	28.0908	20.8355	21.8392	20.1214	22.4459	20.2914	20.1913	20.7124	19.496	19.8434	20.9019	22.0689	22.7608	19.5348	27.6456	21.9227	21.43	20.9451	22.8699	27.4562	29.0091	28.2013	28.2343	28.9013	29.2271	26.5841
SDC3	20.853	22.2204	20.7507	23.215	23.2203	21.4982	22.6687	20.8812	21.3697	21.2809	24.9842	25.5647	26.7664	25.3506	24.7669	22.5595	19.5937	21.0184	21.5212	20.6084	20.8427	21.0959	26.0761	20.0893	20.3696	18.3931	21.5317	20.2415	20.2589	21.6341	20.993	21.1746	22.4169	21.2458	20.0877	20.7832	20.5454	20.3571	20.3135	21.7446	25.8587	26.6443	20.8497	21.0488	21.7493	21.2375	20.6095	20.7173	25.4108
AUXI	23.2368	23.4085	22.6135	20.9327	22.1387	19.9686	20.6393	22.5707	23.7273	20.9435	25.315	24.8199	25.5143	24.6987	24.2384	25.2844	21.1874	19.9904	24.9329	22.1933	22.3839	21.1568	21.1139	23.1782	23.1535	22.7836	20.8599	24.3746	23.6486	24.1585	24.9356	23.9842	23.5581	24.4579	24.0478	24.7271	22.0786	23.9604	24.0249	24.3142	27.0132	26.4905	25.6731	25.2967	26.1013	25.9771	26.1034	26.5165	27.0415
ADA23	20.3779	20.8684	19.9367	21.1003	20.6575	21.2687	20.3129	21.1031	20.061	20.1138	20.4787	23.457	21.5702	21.9816	18.965	22.2083	26.9284	25.6625	29.7847	27.3711	29.5248	26.4443	28.907	28.5871	28.2283	25.5771	24.4264	20.8099	21.4895	21.776	25.9809	30.6557	29.9107	25.6919	30.225	25.7826	27.4638	25.7542	29.249	25.1763	21.667	20.0592	21.6822	20.0042	22.6518	20.6663	24.5554	19.994	22.5239
FZD7	24.0615	23.0644	23.3302	24.0923	20.501	23.357	20.5582	19.6735	21.7472	21.5239	20.0634	24.3623	24.4137	25.2155	21.3206	21.5809	24.9642	22.9902	28.5026	28.4637	20.2792	22.4288	21.1259	20.4029	19.9921	21.5861	29.8324	21.3532	20.8499	19.5848	22.1182	21.5898	22.051	20.5524	20.4224	27.1438	19.5793	22.053	21.6768	21.028	29.5415	28.3586	23.7757	23.3488	23.8691	26.7375	27.8063	27.7186	29.3258
MEGF6	24.6178	24.7445	18.8901	24.5975	20.9048	19.9373	18.9775	21.5155	24.6745	21.0722	24.846	26.3337	20.6706	21.4148	25.0366	25.2773	21.3712	21.6389	19.5966	20.029	21.0065	21.5214	19.9291	19.4857	24.7194	20.9883	21.2247	21.7136	21.6443	22.8031	25.0344	22.0112	19.8052	22.6485	21.8388	21.2229	24.7723	21.263	19.8383	21.2928	20.9337	22.4264	24.9565	25.05	22.2685	20.9003	26.8306	27.5384	25.9853
ATP9A	25.5111	19.5512	24.7249	24.4116	23.5917	25.2863	25.5388	25.376	24.2867	21.3505	19.042	24.2722	21.725	27.5306	20.9455	27.8275	22.7704	20.7214	21.8448	20.7768	23.5728	20.8502	21.5789	18.8543	26.6246	25.2279	25.3903	25.6707	24.9013	22.3997	21.5784	24.3569	22.2613	25.1718	24.6749	24.1171	25.6093	27.3375	21.1858	20.7468	26.9767	26.5819	25.1071	25.1172	26.1935	26.2	24.295	26.4508	27.5372
N4BP1	25.8764	23.0996	23.6281	25.2579	25.099	25.2283	24.5512	24.1749	25.9802	26.7265	27.062	26.9221	26.3125	25.5739	25.1597	24.4938	25.029	26.4395	25.9004	19.6152	26.1888	22.383	24.5484	26.0297	20.957	20.8363	20.7186	25.3231	25.4719	25.0247	21.6352	20.7862	21.0588	25.5305	19.6145	20.9575	24.6124	21.1908	20.5925	20.8453	25.1433	25.077	24.7096	24.5244	24.4358	23.2291	23.1025	22.6827	24.7503
ROCK2	29.8546	29.787	29.3069	28.694	29.5262	28.997	29.3846	28.2172	28.5374	28.3599	29.9677	29.1225	29.2781	28.2157	29.3938	28.5954	24.5889	25.0397	24.9817	23.5517	26.8427	25.3787	24.6547	26.0955	28.6547	27.685	27.2148	27.8102	28.0879	27.8381	25.7078	27.2694	28.69	26.6216	27.5711	27.3706	28.6049	27.7182	28.1665	26.6338	29.2186	29.3442	29.5227	29.5913	29.4183	28.8111	29.4412	29.0518	29.1702
PTCD1	21.7044	22.2304	19.0528	22.3707	21.4261	20.3574	21.0143	19.0406	22.698	22.3187	20.7779	21.5753	22.1852	21.1963	21.5882	22.5921	20.9978	20.9343	20.3361	21.1066	19.8768	22.1674	19.9915	21.5337	22.0841	21.6519	21.4169	20.5202	22.2384	21.7273	21.0394	19.9121	20.2008	22.8655	20.4427	21.6245	21.2421	21.9156	20.6996	22.2399	22.3203	21.7691	21.9862	21.7064	21.2403	22.813	22.6057	21.1931	21.1104
ATG13	24.9965	22.9743	24.4458	24.6544	23.466	22.6962	22.7262	22.0779	21.3242	22.3974	23.2141	24.513	23.7364	24.4814	18.4804	22.6051	21.6146	21.1871	21.7154	22.6616	20.2854	20.1984	21.9082	21.1114	21.6049	20.3538	23.1832	20.2505	22.765	23.4764	22.2186	20.323	20.6041	18.5039	19.5683	20.9835	19.7085	24.8731	21.5325	23.2005	21.6235	24.1252	23.6402	22.6162	22.0815	22.3553	21.0902	24.0688	24.0802
ZC11A	23.469	19.7223	20.539	24.5858	21.8967	24.7778	20.5033	29.1972	21.3184	21.4168	21.7475	23.9346	21.4702	21.1397	20.0771	24.1229	26.3232	25.6493	20.6127	24.9859	19.0993	26.0279	21.3629	20.1006	23.3817	21.7577	21.5071	22.7079	25.0613	26.1168	22.4195	19.4946	20.6246	21.8465	17.2276	29.209	22.294	22.6878	22.5159	23.4158	27.2415	29.2412	20.5129	23.2912	25.0908	24.3127	21.992	25.0133	22.3285
CAND2	24.3609	23.9937	24.1208	23.6559	23.021	20.5022	22.9002	22.8613	25.7428	23.6614	20.5644	21.019	23.1757	24.2508	23.5122	21.5819	20.0645	21.6744	23.7138	20.345	23.5418	21.6772	21.7765	19.336	19.8875	23.8838	23.8728	24.6086	24.5892	20.8904	23.4514	23.4109	23.9137	22.7292	23.7852	21.3306	21.6887	21.2869	23.0266	22.04	24.7048	24.6537	24.2451	24.6944	24.5579	23.2718	24.291	24.8218	23.62
DJC13	26.0064	26.3722	28.4739	28.0555	28.6329	28.1899	27.6429	27.574	25.9509	25.6861	27.076	27.1801	28.4867	27.2259	28.7422	27.9879	24.2082	23.9015	25.5692	26.3963	24.5228	19.1162	24.3242	24.4965	28.1478	28.1264	26.6554	23.952	25.5051	26.875	22.602	23.6374	23.9914	24.3391	22.8267	23.8138	27.1363	27.1949	26.4036	26.2183	28.7504	28.5644	28.3213	28.9075	28.4082	28.868	28.5018	28.7045	26.7007
PP6R2	30.2948	30.0711	29.3988	30.3156	30.073	29.2528	28.691	28.8881	30.9096	29.3885	29.4292	30.0288	30.192	28.1591	29.9776	29.4228	30.6794	30.7621	30.3557	30.1242	27.4097	20.327	29.4517	20.6766	28.2015	29.1151	30.634	27.5046	30.1588	28.089	30.1678	30.1955	28.7421	28.3556	29.3531	28.6331	31.0223	29.3002	29.1036	29.3728	30.2623	30.5332	30.1246	30.6532	30.5543	30.4017	30.8218	30.7807	30.2119
ATS4	21.5755	20.7538	18.663	24.3439	21.5351	20.6403	19.529	21.2584	20.3059	21.4887	28.6464	26.1037	29.2453	25.1423	23.9706	24.1547	28.3406	28.33	22.3315	19.859	28.7545	28.8226	21.1659	21.3459	30.7482	26.3373	25.0639	22.6057	31.0448	25.5002	22.696	24.1027	21.6931	21.3665	22.2761	20.9057	27.1838	24.5427	25.7411	23.141	20.308	20.633	21.2107	21.2557	21.1455	20.9616	20.5606	20.4474	19.2167
CNOT3	26.317	26.3887	24.9306	24.3655	25.6348	25.1409	25.0353	25.2498	25.6881	26.9109	25.2107	25.9369	25.5737	25.6213	26.8724	25.5225	24.5729	24.6835	23.8824	23.3711	20.492	22.6985	24.4495	23.5579	20.3504	25.4658	24.9535	25.0039	26.2064	25.3992	24.0155	22.086	24.669	26.0772	23.6893	23.4849	26.2104	24.2495	24.8865	25.3076	25.8906	25.9298	25.9727	26.3813	26.026	26.1901	26.0334	26.0939	25.7493
SIN3B	20.2165	21.1352	25.1179	23.4087	26.6535	24.8037	24.2612	21.4638	24.0293	21.4665	26.3446	24.2696	21.5454	26.1212	25.2194	23.8109	21.65	21.6634	20.2552	21.0448	20.2962	19.5834	20.5347	22.2112	25.0824	22.6043	22.1839	20.9081	20.0925	20.3537	22.275	21.4324	25.2582	24.7882	22.5665	22.315	20.7393	22.4302	20.5577	29.0356	21.5203	22.1055	23.5001	23.2317	24.7308	24.6595	24.6914	24.8397	25.0015
DNJB6	25.7988	25.9525	24.5209	24.5972	24.4916	24.8793	25.3842	25.8623	23.4735	25.3427	24.9271	23.5072	24.9328	24.4513	24.7193	23.2674	26.4977	21.2664	25.9566	25.9512	24.7177	20.3067	21.5338	19.2663	25.9786	26.7308	26.8483	27.0947	26.2444	24.2178	26.3761	26.0904	25.5476	26.0526	22.1283	22.3036	25.4115	23.4239	21.5177	21.5981	25.3594	25.5315	25.1472	25.353	26.1572	26.2082	25.8436	25.6438	25.0982
COQ9	20.9544	21.8739	19.7198	22.0884	20.372	22.0077	20.957	21.2353	24.9814	25.2073	25.8722	20.1908	24.2949	24.2317	20.4054	21.2437	20.1388	21.0791	19.8582	19.2987	20.235	19.5763	20.8564	20.5555	20.1827	22.8954	21.2177	21.4359	19.9935	20.2629	20.9902	21.0527	21.9905	20.6862	20.3243	21.2792	20.8991	22.114	22.3038	22.3216	23.5626	21.2893	22.619	21.6753	24.7009	21.9449	24.8999	25.8637	23.5761
NDUS2	25.2508	25.2863	27.1824	26.9404	26.9079	26.5445	25.8252	27.1603	25.6952	25.5438	26.9299	28.1993	28.0033	27.2529	27.0607	27.7664	28.3996	29.4316	27.8057	27.701	21.2761	20.2458	26.4555	20.6869	28.1184	25.8868	25.6814	25.8177	26.4222	26.571	25.7796	27.2364	27.4519	25.2628	26.4475	26.9187	27.6079	27.5329	26.9901	25.699	27.9517	27.8738	28.0823	27.332	27.9532	26.8664	27.9884	28.4053	28.3047
ZPR1	28.041	28.3165	28.0708	27.4912	28.1116	27.5213	26.3166	26.2557	27.1588	26.6283	28.1093	27.9457	27.7988	26.4668	27.0862	26.1494	20.8939	20.7941	20.7949	20.0465	25.4369	23.6715	23.486	21.042	25.4339	25.1143	25.0359	22.9831	26.3883	24.9665	24.2627	24.0586	25.6921	21.1616	23.7	21.8519	25.5379	25.0799	25.8419	25.446	26.4983	24.2045	26.5481	26.019	26.1203	25.3369	26.1427	25.4227	26.5707
NIPS2	21.4961	21.1732	27.1806	26.3412	25.2224	26.6995	25.5431	25.4849	26.4729	22.1727	27.7164	26.7641	25.4055	21.7176	26.2403	27.3077	26.1307	25.8117	20.2613	27.0393	25.6204	21.5957	23.2523	25.133	26.1327	25.9207	19.7486	21.4952	26.205	26.475	26.5535	25.6279	25.2221	26.3411	26.7065	27.1492	25.1635	20.2878	26.3473	26.9284	27.0947	26.5281	26.7691	25.3804	27.241	27.3189	28.8522	28.5485	26.6324
PDCD6	27.6984	27.3227	27.8107	27.873	29.2181	28.5407	26.6851	27.6653	25.7191	25.3708	28.0386	27.908	28.1185	28.4059	27.6887	28.2343	21.6389	24.4909	24.0546	19.9835	25.9467	26.3785	20.2909	24.362	25.3436	26.5796	27.9755	20.367	25.8296	26.5533	26.7857	27.9691	26.892	25.8123	24.2055	25.6316	26.8948	26.6092	26.2493	25.7656	28.1827	28.0515	27.921	28.7217	28.4053	28.6747	28.8808	28.965	28.3395
VATG1	29.1652	30.0655	27.6521	28.0683	27.9807	28.0572	27.9686	28.4837	30.4915	31.2055	29.0942	27.2674	29.7533	29.2353	29.916	27.7343	29.537	29.9157	27.6553	28.5811	29.8221	30.0079	27.2476	29.1604	28.3153	28.4269	28.0782	29.0833	28.4946	28.8286	28.0633	28.3121	29.2291	28.0169	27.3122	27.6645	28.8191	27.1871	28.1119	28.116	30.775	29.4117	29.0351	28.3325	28.6007	28.9857	28.5444	28.8992	30.298
VPS4B	28.8764	28.6932	28.6533	27.911	28.8385	28.3217	27.8355	27.705	27.1221	23.6993	27.6704	27.7661	28.596	28.3209	28.5807	28.4162	25.0479	25.1936	22.5144	23.2392	21.4924	25.2591	25.6982	25.1899	27.5513	26.7494	28.05	28.0666	27.8552	27.5147	28.0681	27.4543	27.9944	28.1067	25.4272	27.6172	27.4147	28.1828	27.6007	27.6003	29.0226	28.758	29.0059	28.6769	29.3354	29.482	29.3463	29.4379	28.645
MPU1	24.9215	24.8232	26.6573	25.7793	26.1034	26.026	24.2794	19.7711	22.1512	19.6332	24.6339	26.0709	26.0378	20.8013	27.1765	26.2499	22.4932	21.8606	21.7787	21.0541	21.6551	21.4963	21.0208	21.0189	20.8721	24.1219	20.3765	20.4242	25.8827	21.0616	19.3543	26.877	24.7548	22.3876	23.9844	22.1413	28.1561	21.9321	25.5426	20.0465	25.3289	25.2875	25.4462	25.6446	26.0824	26.2288	25.7742	25.9259	21.9916
ENTP3	20.0069	19.7627	19.561	21.5458	22.4398	20.5856	20.7044	19.9098	22.8166	21.8366	20.4644	20.5596	21.548	22.4635	21.2903	21.878	21.2443	21.2093	21.6314	22.0753	22.3235	21.6582	19.887	20.5887	21.5323	21.0341	23.6546	22.232	20.8649	20.6827	21.2249	23.3438	23.2396	21.5895	22.3636	22.1112	21.7324	23.0548	21.2705	20.7402	25.6969	24.8506	23.005	23.4966	21.4387	23.2519	24.1778	24.268	22.446
ENTP5	20.7617	23.521	22.7857	20.8505	20.2639	20.3429	23.6312	23.6782	21.9421	21.4223	20.7071	20.3725	24.5052	20.4246	20.2563	23.4306	21.0582	21.559	20.5584	21.3792	19.4949	22.3229	20.84	19.4329	22.2034	20.5007	20.9767	20.8731	23.3415	22.6518	22.2394	21.0407	21.186	21.3312	20.8229	21.7574	19.6286	23.3001	22.8291	21.8372	22.8862	23.6748	20.1066	22.0165	22.978	21.3695	22.4094	22.4988	24.1168
BCAS1	19.5244	21.2409	21.5229	22.5813	20.9552	21.9236	23.9411	27.3407	21.918	21.8989	26.837	23.7275	27.4737	21.0646	19.8313	26.7949	30.9411	28.6352	29.8638	30.5176	29.9146	30.8089	28.8144	30.4308	28.5933	26.663	31.5365	29.1452	28.2975	29.439	29.3673	31.9458	33.2623	31.1336	30.2674	28.3138	26.5676	29.3293	30.5679	28.8904	25.5695	25.3178	20.8461	21.6035	25.96	23.6858	21.0075	21.1112	21.2415
H2AY	23.9016	21.0834	19.6792	17.9699	18.3221	22.6125	21.9535	20.3281	22.1656	25.0841	19.143	21.6735	24.9985	23.4447	22.5319	22.9853	29.2043	29.5569	28.3669	28.1391	28.7609	28.9842	28.5988	29.2651	29.0977	28.5805	27.791	28.6271	28.2449	27.8417	27.6103	27.9044	29.5079	27.0501	28.4293	28.1038	27.5103	27.7401	28.4295	27.9871	29.7055	29.9276	31.1644	31.0797	30.8777	30.8565	31.3518	31.1859	29.6696
FLNB	32.8248	32.882	34.7978	34.6224	34.0741	34.0312	33.9176	33.8956	32.6134	33.0878	32.1571	32.3432	32.289	32.5722	31.1582	31.6105	34.22	34.0992	33.8297	33.9402	33.0518	32.9772	34.2075	34.2781	33.2429	33.317	35.1038	35.4862	34.1575	34.1138	34.8387	34.8717	34.3715	34.4782	34.5695	34.3251	33.7835	33.4427	34.1234	33.7985	31.9962	32.0555	32.839	32.8357	32.8228	32.9099	32.5393	32.4626	30.5402
NCOR1	25.0521	21.116	23.3316	27.1596	20.2137	26.9869	27.6936	27.6841	20.7921	21.6045	24.3118	24.7911	23.9983	25.9202	26.3682	26.0105	21.6737	20.6945	19.0912	21.2765	24.5342	19.5098	20.2971	20.3	20.8894	21.185	26.0788	28.0449	27.4792	25.6569	26.5026	21.4338	22.4698	21.4359	21.2781	25.1084	21.5228	26.8663	20.5852	21.9648	24.1415	28.1746	24.8549	24.4884	23.9968	21.6676	28.2706	21.7962	26.3223
CISY	30.9397	30.2626	30.2966	28.6288	30.3796	29.4261	29.997	27.387	24.8469	28.8059	30.1365	31.031	30.0379	27.8338	30.9328	28.8205	28.6802	28.8077	28.3023	28.0745	28.498	26.6857	28.4896	28.5494	30.7486	28.0762	29.4085	30.2027	30.2649	30.7003	28.0774	28.3129	30.1919	28.4628	30.2583	26.4593	29.8386	29.974	29.9481	29.2467	31.3538	31.1108	30.4909	30.3959	30.8653	31.0046	31.2985	31.3725	31.3362
SC22B	27.9677	28.5915	31.1133	30.5492	30.1389	30.416	30.6397	28.6207	26.7532	26.8609	29.046	28.3937	29.1232	29.0002	29.6049	29.3434	28.0778	27.4761	26.5582	27.0274	27.6033	28.3082	26.2889	27.2607	29.4323	30.9215	28.9983	27.9752	29.104	25.7144	26.0986	28.2527	28.2919	28.1414	27.0321	27.353	29.1999	27.4898	28.9947	27.0346	30.0204	29.8606	29.7747	29.9779	29.7972	29.6759	30.0842	30.1806	30.9057
LRCH4	22.7835	23.8426	24.4264	25.5628	24.2247	27.435	23.4171	23.1403	24.5644	23.6892	26.1793	21.7486	23.841	20.1964	25.3225	21.1567	29.4703	23.5037	26.0662	19.6476	24.2028	27.3971	21.2824	26.9961	23.3992	21.283	23.1484	22.0577	23.0837	23.2241	22.543	20.2224	20.9944	21.2808	20.5848	20.9759	20.4679	24.1348	21.558	22.7595	24.4091	24.7888	24.602	24.9378	24.4631	24.453	25.7083	25.67	23.9611
MTX2	24.2896	20.8131	25.214	25.6892	24.7161	20.7091	23.0659	22.8832	23.7851	26.652	22.9492	21.7217	25.2722	25.6152	25.5648	23.431	24.9467	21.2927	21.2387	20.9535	28.1183	28.0971	26.0095	22.2182	19.9883	22.9634	26.6521	26.6996	19.8661	23.6796	21.1001	26.5818	24.5006	24.9902	26.6622	26.3811	26.0011	25.5522	26.1546	24.9219	26.6303	26.5541	26.2397	25.8467	26.0167	26.1562	26.4867	26.7331	27.4136
VP26A	29.4935	29.3446	30.357	28.7945	30.3727	29.1008	29.3508	28.6731	28.7208	28.4753	30.6105	29.2051	30.3143	29.918	30.3908	28.3125	27.6274	26.93	27.5479	25.1375	27.6141	26.4897	26.6679	23.7311	28.5668	29.4823	29.3293	28.7487	29.1674	28.4052	27.6759	28.8879	28.999	28.4289	28.8101	28.8349	29.1093	27.945	29.3871	28.7589	29.1234	28.7587	29.0993	28.8643	29.2822	29.2838	28.4098	28.8785	28.6221
MPPB	27.0112	27.5932	28.9325	27.208	28.1881	27.1919	27.2231	26.8057	27.1701	26.0919	28.7372	27.317	28.4151	26.7068	26.8975	27.0434	27.4043	24.887	20.8178	19.3871	25.1693	24.7155	20.3079	19.5849	25.154	25.3397	24.7251	23.276	24.9594	24.0322	23.7152	23.0938	25.5865	23.7426	25.4014	22.6925	27.3829	26.3881	27.847	24.4264	26.5188	27.9624	26.8368	25.8772	26.6676	26.7392	27.471	27.9535	28.9307
CRLF1	22.454	20.7752	24.5922	24.5124	26.7833	26.5187	26.9329	26.8846	24.085	21.5839	24.2902	27.8752	26.7112	26.282	26.7379	27.6722	26.4271	28.1688	24.2447	21.4393	28.6028	29.5631	19.5708	19.7722	30.4777	26.5659	22.7861	26.1019	29.4982	26.7596	26.2722	20.7206	21.0072	26.3316	26.3276	23.2273	28.0956	26.8289	28.7253	26.4152	22.3126	21.7191	22.2841	22.2223	20.6633	21.1005	20.5842	21.8175	21.8995
PSIP1	25.0979	25.5832	24.0606	25.3932	25.5489	25.3743	23.2139	22.1999	25.5039	25.7375	24.0419	24.3356	24.4056	23.1215	24.204	23.3853	23.2954	23.5912	24.2504	24.1295	19.655	22.5602	24.8608	23.7593	25.2829	24.0615	27.1518	26.7294	26.9275	27.0243	25.9706	26.8634	27.488	26.4116	27.5535	26.8263	26.9793	26.8542	27.151	27.0576	26.6846	26.5106	27.7693	28.0517	27.8224	27.8204	28.0053	28.4066	27.3192
NDUS3	27.8121	27.9307	28.0861	26.9673	27.434	26.1759	27.1609	26.3995	28.304	26.6843	28.6431	28.8281	28.1902	28.4106	28.885	27.9493	26.4288	26.6298	25.9995	25.9309	25.6548	25.0342	26.0315	26.1364	25.605	26.7094	29.0308	29.0274	28.2144	28.8427	27.8474	28.8847	28.6179	28.2441	28.1552	27.7384	28.3404	27.8613	28.1508	27.8473	28.81	28.9801	28.8685	28.8077	28.511	28.4618	29.0031	29.07	29.3129
SRS10	21.966	24.8603	23.8508	23.9308	23.5703	26.7568	22.3059	21.3126	25.9668	24.9561	22.1739	26.1186	24.2986	24.793	25.6017	21.9759	25.4398	21.6937	22.4811	19.5046	24.6606	22.9347	24.5551	23.1391	25.3166	26.3514	26.2735	25.7157	27.697	27.2029	25.5604	26.3701	27.0322	26.8635	25.5364	25.1158	26.4279	25.9682	27.2527	26.4721	27.3335	26.0451	27.813	27.5587	27.4531	25.6418	26.2251	27.6052	26.8021
HSBP1	25.964	25.0805	27.0382	25.2294	27.0689	26.9644	26.8312	26.452	26.4904	26.7023	27.3381	26.5205	26.7061	25.1055	26.7283	25.9911	20.9268	21.3958	22.2719	21.9871	19.7693	20.4972	21.6089	21.4658	20.5906	20.329	25.591	21.241	27.2959	24.9936	21.3855	24.7481	21.4654	23.6847	26.1806	21.4599	26.5157	24.6642	23.7542	21.0385	25.1155	25.7376	25.7383	26.1546	25.9251	25.9642	25.7591	24.6404	21.1443
ECI2	27.3383	27.5838	27.4214	26.6942	26.2015	26.0574	26.922	24.1332	26.1116	27.0954	26.6238	25.3868	26.9364	24.9923	26.1088	26.1871	25.0008	24.9813	26.5213	26.497	24.7803	23.0715	24.7184	24.213	25.3324	26.8352	26.6839	26.7285	26.3627	24.3391	24.8458	27.4221	26.9303	26.2653	26.0602	25.8052	27.2603	23.9532	26.3379	25.167	27.3026	27.3139	26.5896	26.6421	27.2278	26.6668	27.6413	27.9397	27.9711
KHDR3	23.5563	21.8398	20.644	21.0179	21.1079	21.3788	23.6351	23.6374	25.0731	24.5642	23.7234	23.1157	24.5952	25.5182	22.8693	24.0719	22.4614	22.2044	25.1112	24.5189	22.5183	27.5524	24.6843	21.5554	25.8178	26.5135	25.5406	25.4446	27.441	24.9549	24.1972	20.4251	23.8988	23.3476	21.8142	25.3966	27.4249	25.194	23.9692	24.4262	25.7625	26.215	26.5914	26.0627	25.8863	27.1428	25.7285	26.6146	24.6697
BAF	26.6378	26.088	26.5047	26.1559	26.2936	25.5452	25.9441	24.4026	27.7546	27.6398	28.3611	28.0994	28.7494	27.6676	29.8419	27.2685	23.5913	23.8745	25.1591	25.2891	21.0475	22.5446	24.6069	23.9729	25.7459	23.4558	30.3192	29.7155	26.4309	25.585	27.2818	27.4687	29.5621	28.5542	24.8825	25.9129	29.975	28.0673	27.715	27.2772	28.9996	27.6711	29.9874	29.5918	28.7536	29.2048	29.067	29.1841	28.8264
SF3B1	26.0984	26.9952	24.6553	24.5828	21.4625	25.8475	25.0345	23.4352	25.1826	25.8418	21.8609	25.1636	27.0482	24.942	21.4541	24.9793	24.7652	24.4284	24.7601	21.5741	25.847	26.0451	23.2833	25.516	28.6239	27.5445	26.4933	26.4129	27.7544	27.2063	25.2881	25.799	24.6689	25.5305	25.1917	26.002	28.3877	27.409	27.7978	27.6369	27.6137	27.6721	28.706	28.4499	28.0794	28.5974	28.8067	29.2758	27.5171
CSDE1	30.3817	30.3143	30.1482	28.8747	29.8685	29.6076	30.325	29.8357	29.5194	29.0535	29.9591	29.2483	29.7842	28.6782	29.3724	28.7959	28.3703	29.2196	27.4494	26.885	28.8513	28.6142	26.5067	25.5363	27.318	27.7223	28.6106	27.871	29.1119	28.7177	26.5841	28.1385	28.2968	27.6981	24.4017	27.0039	28.5516	27.2687	29.0004	26.4527	28.6004	28.5639	27.9721	27.6532	27.8553	28.813	28.4876	28.5493	29.4568
SKAP2	21.0961	20.4259	18.9726	24.3909	23.061	23.3292	23.4438	24.0209	20.647	21.3576	21.2395	23.0675	21.7225	21.8111	23.7882	24.0201	20.3431	20.3014	20.6341	20.1976	20.4432	22.5693	21.2616	19.8588	21.7508	20.637	21.9431	21.9098	20.3352	20.4397	19.7456	20.3903	24.0807	24.6436	21.079	21.7837	19.7099	21.9266	20.9596	24.6714	23.4067	21.676	23.5221	20.212	20.7215	22.7282	23.1992	24.6178	22.2548
LYPA1	27.2436	26.3756	28.108	27.3374	27.798	27.3775	27.1033	26.899	26.8174	23.9464	26.0669	24.9393	26.3456	26.3207	26.1504	25.2296	25.219	21.7999	21.1421	19.7221	19.801	20.8467	20.8732	20.0812	24.1391	25.4025	24.3881	24.8448	24.4463	22.3033	25.1246	24.3953	20.7676	22.4831	21.8641	20.3986	24.71	24.1774	24.7137	25.5788	26.8039	26.9576	26.533	26.6072	26.1912	25.8384	26.4096	23.5177	21.4585
U520	27.586	26.5975	24.3214	22.7112	21.6876	22.117	21.7737	26.8479	26.3025	25.7423	21.8378	23.7648	25.5323	24.1582	25.143	24.5512	24.7152	25.1227	23.3181	21.5759	22.7669	22.6383	23.3589	22.005	29.4133	27.2275	25.5089	25.8152	28.7919	27.8921	25.9916	27.3118	28.0144	26.5249	26.2195	24.4913	29.5216	26.9062	28.7895	26.799	28.057	27.6219	29.4785	29.7064	29.2759	29.4916	29.913	29.9588	29.0239
TIPRL	21.6755	25.3924	25.5543	24.1387	26.2294	24.8412	22.1799	22.5991	23.3574	22.9292	26.4636	25.5189	25.4866	25.8223	24.253	25.9909	25.0878	21.6009	21.6082	21.3948	20.7861	21.3759	21.1933	20.6668	21.7245	23.8541	20.8902	19.9448	21.2402	21.7238	22.7745	20.5522	24.1131	24.6074	21.5894	21.1769	20.7428	24.2588	21.0076	21.3927	24.4191	20.2679	24.6071	24.8456	25.1705	25.1405	25.0078	24.0646	21.0499
TM1L1	21.5494	24.6109	24.0668	25.9108	23.6509	24.5253	19.6853	25.0443	24.8594	24.2231	23.2741	26.3268	25.7521	25.9213	25.9257	26.2238	21.9763	22.0602	20.461	22.6304	23.4524	20.7939	19.6643	20.1065	19.8258	24.3791	21.0681	24.6141	22.1125	25.1487	19.9652	21.75	23.4642	22.2474	21.8973	21.5548	24.0514	24.3812	24.257	24.2906	26.4033	25.9959	25.4835	24.9217	25.2035	25.9942	25.0268	25.179	25.3956
KS6A4	22.8893	21.9476	24.2884	23.9695	25.2177	20.8094	23.3924	19.464	20.3569	22.5149	24.7987	21.5629	23.9755	23.6761	22.0197	21.6721	20.3118	20.2423	19.7521	19.4369	21.6074	21.6108	21.6675	20.9399	22.1872	23.6816	26.0927	20.748	27.4749	24.3553	22.577	20.3648	22.2404	20.7625	20.0838	23.9284	20.9691	21.9915	19.5045	24.9394	21.6029	24.2412	26.1084	25.4141	25.4799	24.6042	23.9767	24.8842	24.4807
PPM1B	26.8721	26.6849	26.5012	25.6191	26.7766	26.1632	26.7013	27.076	25.9938	26.3468	26.8716	26.5776	26.8582	25.364	25.6318	25.6388	20.5636	27.0694	21.0131	19.7033	21.6936	21.6964	20.5002	21.7418	26.7792	25.1516	25.8308	27.2358	25.2821	25.3287	25.3281	27.4605	26.5659	26.7563	27.2385	24.6588	24.4387	25.8773	25.0376	25.984	26.509	26.6815	26.3826	26.4602	26.4012	26.4132	26.7543	27.0957	27.74
NU155	25.3066	26.5873	26.3273	26.061	25.9545	25.3435	25.0541	24.9444	26.0217	25.9835	23.8326	25.486	27.0219	26.5885	25.9062	26.5853	23.1623	22.8889	23.9433	22.0715	23.4013	20.0758	24.2768	24.6463	26.2117	26.1638	25.7612	26.1584	26.1379	26.3747	25.1551	25.6824	26.3772	26.4688	24.3835	26.2712	27.1148	25.3331	25.1998	26.7361	26.1314	26.4289	27.4776	27.8347	27.2963	26.8175	27.8919	27.5148	27.1606
XRP2	24.2443	23.5516	26.5803	25.1939	26.4968	26.0177	24.3936	25.5696	26.3047	25.3583	24.88	25.909	24.869	20.9028	22.8965	19.64	23.7945	23.9826	23.2379	22.8327	21.9346	22.9067	23.1806	22.6388	26.8163	25.7784	24.8003	26.1203	25.2831	24.1683	24.0177	25.8209	24.9298	20.9552	25.6902	25.214	26.7637	25.8356	26.516	22.7401	23.88	25.5964	26.4885	26.6427	27.1946	27.3982	26.0068	26.2598	24.8568
CMC1	27.9909	27.8118	27.0825	26.2793	27.5584	27.2093	23.1505	24.8976	25.0126	27.4184	27.8492	26.0795	27.3876	27.5933	27.4457	26.9555	26.81	20.943	26.1643	23.4261	22.8833	21.6817	25.9664	22.352	27.6891	28.0749	28.1805	27.7126	27.4844	26.3677	26.0128	27.6483	28.7233	27.282	28.7324	26.3302	29.0345	28.3191	28.0349	26.8585	29.5669	29.6507	28.784	29.208	29.2662	29.5146	29.8129	29.8959	29.8889
RENR	20.9928	21.053	26.1505	25.1842	24.6922	21.9207	25.1065	25.6086	25.591	25.9058	26.3856	26.346	26.6502	24.0428	25.4235	24.8214	20.6533	22.1895	22.2785	21.243	19.9625	20.2658	22.5913	20.1586	23.4738	25.4247	20.4463	19.6631	25.1392	23.6055	21.7153	20.799	22.0551	23.2337	22.7203	20.3623	24.6418	24.2975	22.557	23.5452	24.4816	25.399	21.5109	23.8659	23.5035	24.2695	24.8856	25.2567	24.7493
POP7	20.6742	20.4716	20.8572	21.2969	21.8882	22.0816	20.7729	20.6782	22.8247	22.526	22.4366	21.9858	22.3703	20.1869	19.9827	20.9546	24.2429	25.7318	26.5469	24.3548	21.4867	24.3803	23.4047	23.4532	20.1204	19.9037	20.8344	21.2345	19.4108	20.668	20.9984	21.3549	21.7787	20.5472	24.4697	24.8491	22.756	21.4273	23.8354	24.0318	21.5938	22.0867	21.5018	20.9059	22.3915	22.3282	19.0324	21.7252	21.6304
RPP40	20.9569	20.3227	23.9283	21.2708	20.2246	19.7907	18.6374	21.3448	25.1946	25.0203	21.3913	22.1565	22.8319	23.037	19.5631	21.4313	20.0993	21.1904	19.9608	20.8755	20.2551	20.8476	20.8529	21.6471	21.1497	20.9638	20.325	19.9335	20.5994	20.8182	21.489	20.074	20.0374	21.8201	21.0915	20.8916	21.9407	22.3764	20.7608	21.6439	22.2327	22.3602	22.1439	21.8317	23.6491	20.6036	20.5645	22.3567	22.9199
EIF3G	29.7394	29.591	28.5716	27.3822	29.0923	28.4939	28.7969	28.4069	27.8955	26.6132	28.2789	28.8833	28.9792	28.2909	28.8755	26.6214	23.7291	23.5308	22.6994	21.6674	26.6506	26.6926	24.6671	19.8121	26.2544	25.4956	27.9903	23.7112	28.3405	24.9581	25.9349	26.2569	24.5377	25.5626	25.0281	23.393	27.6604	26.5532	26.6667	25.9029	26.4619	26.4443	26.8515	27.4152	27.7342	27.8508	26.7548	26.8812	26.8917
CBR3	27.525	27.9707	28.4613	28.0283	28.9803	28.314	28.9213	28.2297	26.1763	26.5137	29.5746	28.5334	29.4488	29.1722	29.3127	28.1881	27.4055	25.5119	27.2996	27.7531	28.5032	28.0865	27.9911	28.2439	26.8742	26.8919	28.2575	27.9956	27.6469	26.256	27.6571	29.2467	29.4003	27.9988	28.6419	27.435	28.7171	27.91	28.1009	25.8836	28.7738	28.5922	28.9775	28.9825	29.0116	29.059	28.7232	28.6199	28.8389
FACE1	23.7351	25.2603	27.8374	24.9213	28.105	27.1984	23.5677	27.5936	27.4765	26.1662	18.7401	26.5433	27.2577	27.0916	27.6326	26.3361	22.4435	25.8338	23.8262	24.4919	20.2776	26.3292	23.8073	23.6866	28.7408	28.0097	25.3132	22.9408	27.9621	25.4685	25.1867	25.8111	22.8665	22.3538	25.3081	25.384	26.8768	21.6536	26.3623	26.3253	26.6451	26.8486	26.6561	26.3067	27.4033	26.2186	27.4824	27.3521	27.1693
SCO1	25.6887	25.6318	25.0519	24.2557	24.6446	24.8768	24.5009	25.9276	27.1157	27.3648	26.1419	26.413	25.0243	25.1704	27.2029	23.8111	20.1224	21.5242	22.7509	20.1038	24.1264	19.4643	20.7996	21.5681	25.9709	28.2448	21.7549	21.5407	25.8478	20.523	21.4305	19.9758	20.7253	22.1351	26.8102	21.0031	20.9413	22.3008	21.9137	25.4936	24.9947	26.71	20.313	26.5028	26.4946	26.3837	26.4005	26.5935	27.6054
RBBP9	20.7393	22.9507	25.1674	24.474	25.5327	25.2798	25.1345	24.5148	24.2871	20.7648	25.2814	25.4106	26.1444	24.279	26.7213	25.832	20.9229	20.5345	20.0429	20.3169	21.1024	22.5932	21.7105	22.3723	21.8118	25.8056	27.5219	24.04	22.7972	22.8834	21.3618	20.1554	23.2944	25.534	21.4586	21.008	24.7735	23.9453	21.7333	22.3776	24.715	25.8365	25.4258	25.9639	25.588	26.1557	26.434	25.7737	26.236
STAM2	28.7734	28.6987	27.5417	26.246	28.3959	27.9387	28.0879	28.0907	27.2973	26.6181	28.7915	27.0951	28.3953	27.9184	27.3894	27.1935	26.6231	24.6771	23.938	24.932	26.0257	26.6029	26.0827	25.2319	26.1154	26.9573	26.5724	27.6367	26.7738	27.4015	26.8208	26.2889	25.3959	27.1399	26.4455	26.7533	27.3249	26.3758	27.6792	27.9567	27.4392	27.6312	27.352	27.7155	27.6768	27.5286	27.2889	27.5387	27.4926
DGKI	24.5838	26.0179	20.5574	21.3945	21.1258	21.0472	22.3156	21.0907	21.3704	21.2034	20.1077	24.7503	23.5262	25.2211	22.4934	23.1246	26.747	20.8576	20.2314	20.1235	28.1997	18.2096	19.9729	21.0288	20.1327	21.5428	21.8715	19.7517	21.8949	25.1384	23.1092	23.0638	21.9035	22.1327	19.8882	20.7941	21.9476	27.8067	22.3969	26.0986	26.3197	26.6139	22.5372	20.2054	21.8736	26.2187	28.3372	26.1875	25.5223
PAK3	20.4033	24.6304	19.4894	23.1508	21.1643	19.3612	22.2296	20.778	20.9355	20.809	24.6321	21.4262	19.7004	21.0128	19.8711	21.062	21.533	28.3309	20.2536	19.2765	22.5952	21.784	21.6957	19.6172	21.1001	20.2733	21.7852	22.4784	22.1846	21.4132	20.1316	19.4884	21.2557	21.0677	22.0027	20.9969	20.8476	22.3708	21.9905	20.7353	24.271	24.7604	24.5871	25.9446	24.4879	25.6971	25.5885	25.2006	20.6035
PRAF3	26.6371	26.0716	29.8088	29.5379	29.4259	29.2216	28.9812	26.9389	24.9975	26.3717	28.9996	28.7624	29.4229	29.4842	29.1851	27.5787	26.6514	26.5486	21.4199	25.2005	25.5748	25.4508	26.4247	26.2858	28.5978	29.6179	29.4289	29.386	28.9961	28.3368	23.6256	28.9163	29.4231	24.8386	29.2301	28.359	29.1272	26.5779	29.1	24.1403	28.7405	28.4997	29.4613	29.7914	29.3934	29.6173	29.8101	29.8453	29.0432
DYSF	22.5721	22.6793	24.5225	25.2272	23.3648	25.459	22.9285	23.7514	25.5376	25.5242	21.8184	24.1316	22.3745	24.3504	20.921	24.0524	23.154	25.5775	26.555	26.6366	25.5402	26.2664	24.257	27.3913	27.5857	26.833	29.6795	27.5466	27.2993	25.9667	26.8588	29.4866	29.1133	26.3451	27.5387	25.93	27.4875	25.3143	24.5869	25.671	30.8045	28.9717	28.7907	28.3935	31.0851	30.026	29.5202	29.4301	29.9758
SPF30	23.6557	24.2321	24.0856	23.5465	19.2176	21.6698	23.104	25.0868	23.8632	25.3436	23.9127	24.9629	23.7067	22.7838	21.4447	24.807	20.0751	20.5169	20.2776	21.0428	20.5592	19.562	20.2667	21.3093	20.5306	21.3346	25.6446	21.5845	25.0696	24.5407	20.3101	21.6467	21.6471	21.9124	20.2149	20.7375	21.7546	22.8068	20.7776	22.3047	21.6404	24.412	24.7043	24.1467	24.5356	25.4516	25.3887	25.3787	21.7631
TRIO	28.4361	28.2162	27.147	26.5523	26.2324	24.736	24.5868	24.7744	26.9889	27.0067	27.7474	27.0692	27.9588	26.1412	28.0492	24.4425	22.7756	22.9439	21.0673	23.9195	22.816	22.9426	20.2892	21.8787	25.4868	27.1283	26.0222	23.4798	24.2995	23.2529	22.0707	25.1701	21.5849	25.3374	22.4618	23.3522	26.5356	23.506	25.4293	25.2793	27.764	28.5915	27.4968	27.4831	28.1313	27.7547	27.5359	27.7907	28.2114
CBPD	25.9058	25.5875	26.278	26.918	26.6771	26.7338	25.6251	24.1615	24.4698	26.9467	26.2743	26.7892	27.7017	26.4118	26.5443	26.2851	24.29	21.2432	21.8271	21.9314	23.4794	21.2704	21.4759	24.1	25.3638	22.2311	22.8386	21.5788	24.9659	25.542	24.956	19.6687	19.5484	21.38	23.2346	20.5013	25.6658	25.3639	25.3512	25.1407	26.2368	26.0656	23.9868	25.3748	25.973	25.6298	23.8299	25.1659	27.8364
SASH3	21.1992	21.4718	20.4484	19.7465	21.2943	20.9736	19.8498	20.6289	21.5033	20.4831	22.3154	21.3544	21.5186	20.4599	20.9912	22.6465	21.1688	20.638	19.4364	20.9632	21.7816	22.4767	21.8234	20.3665	21.6844	20.5393	18.5029	20.9362	19.8252	21.1992	21.4077	21.3855	20.0665	21.1127	21.1991	21.9289	20.6868	21.5911	20.7069	22.3858	19.8802	23.9686	21.8228	24.2295	25.511	25.3733	25.3778	25.6959	20.9516
GLRX3	30.9576	31.0604	30.5317	29.6174	31.9046	28.0171	30.123	27.1023	28.1144	29.7777	30.8339	30.2598	30.6618	30.1696	29.8865	27.6293	27.3349	27.7597	26.0506	26.037	28.1981	28.2158	26.1119	26.287	28.2797	28.0761	28.2761	25.6509	29.4846	29.5219	27.0672	27.9045	27.1195	26.4989	27.148	20.5788	29.9735	28.4535	29.3255	29.3729	29.1257	29.0404	28.2642	27.9266	28.3153	28.275	25.4448	27.717	29.3773
RL1D1	20.9092	23.9972	24.0553	24.0632	21.3178	24.3693	22.5208	23.4606	20.68	23.9533	20.5352	24.9816	19.9834	23.8258	22.4224	23.8034	22.5484	22.7426	23.8448	20.5705	22.5621	23.845	23.0845	20.7363	26.731	23.9664	23.9843	23.3932	22.772	24.7414	22.8069	18.7869	21.4417	21.3904	21.7876	22.3455	26.0936	24.7142	26.4532	23.7983	24.3219	23.9561	25.7472	26.9435	25.5479	25.2154	26.078	26.7907	26.7818
WFS1	24.4722	24.0109	25.0969	25.776	24.0253	23.9073	24.4083	25.1131	26.3487	25.1347	25.6913	24.8729	26.1989	25.2746	24.9668	24.8321	23.6081	24.1413	23.1165	24.6699	23.1363	23.7465	22.932	23.7659	24.3938	26.5704	22.8211	25.3761	28.1894	23.0605	23.5449	27.6427	26.3864	26.3622	23.6793	25.053	25.8225	25.4442	22.233	24.2025	26.1067	26.2456	26.684	26.3679	26.7959	26.817	26.8457	26.8454	27.193
NEBL	21.1416	21.5327	21.2671	22.0797	20.242	20.5317	20.1987	21.2491	20.787	21.6391	22.5366	22.1847	20.5006	21.3903	19.1047	20.7522	21.402	21.665	20.3617	19.5691	21.402	19.9232	20.3136	19.914	21.1513	20.0821	21.8304	23.3487	21.015	20.4707	21.4733	20.4336	21.6442	20.7785	20.2673	21.6098	22.0282	22.1243	21.3414	20.0162	24.5492	23.9883	20.5589	22.0823	23.9323	23.8651	21.0618	23.2128	24.2296
SYUG	22.2792	25.9601	25.8344	22.4021	23.9908	22.3581	24.3425	23.6333	22.2382	22.3257	23.6129	23.992	22.0888	22.5852	22.4835	21.4114	30.7433	29.8691	31.5805	31.8102	28.665	28.5916	32.2582	32.3209	25.229	24.3954	32.4291	30.5834	30.633	29.7536	29.6653	33.1079	33.4373	30.2912	31.4821	28.738	30.637	27.2545	30.9349	28.2059	33.3726	33.0398	31.9598	32.048	31.8146	32.0234	31.5194	31.3445	33.9159
PDE5A	19.391	21.1442	25.6009	26.0999	26.3372	25.1034	24.7355	25.654	24.2631	24.3418	23.6431	23.5739	20.0834	21.2203	22.0599	23.0045	24.8732	23.4973	25.7427	24.011	21.7058	25.6828	23.8087	24.4422	21.9869	22.6277	25.0143	21.3425	22.8096	21.337	21.6388	21.9433	20.9547	23.8758	19.9006	21.0384	23.1057	23.2488	22.8771	24.0086	24.5653	24.3336	27.3295	25.8225	26.7763	26.4874	25.6239	26.1675	24.5821
SRP72	29.5487	29.763	30.5128	29.458	28.8505	28.7903	29.7703	30.0173	29.9643	29.6019	29.0305	28.8211	29.2815	28.953	28.6434	28.6358	27.799	27.9064	25.9462	25.3422	24.2102	27.2128	22.7391	24.8558	28.955	29.3823	27.908	27.9879	29.7471	28.9634	27.7282	24.6222	24.0417	26.2109	26.1792	25.9414	29.103	27.6355	29.4607	28.5861	28.058	28.3585	28.3754	28.5877	28.7894	28.2255	29.0676	28.824	29.1067
DDAH1	29.7643	29.5834	30.7455	29.8711	30.4078	29.4126	29.7862	29.6708	28.1775	29.5937	28.5167	28.2014	28.852	27.3012	27.9147	28.4539	33.3444	33.3173	33.0457	33.0166	31.7615	31.9024	33.7019	33.6378	32.5311	31.8122	34.3948	34.0107	33.8499	33.7279	33.7666	34.71	32.7331	31.5835	33.887	33.4869	33.3159	32.8785	33.5149	32.1656	32.2563	32.0511	31.1655	31.2321	31.7103	31.4959	31.4116	30.7293	32.1691
B3GA3	25.9165	21.7191	23.3821	19.5405	21.7592	19.9517	21.0711	21.0032	25.7886	24.5295	24.4145	23.6356	24.6439	25.7041	24.1865	25.4343	19.4525	22.9718	21.7373	19.8622	19.9106	21.4613	20.3639	20.2675	25.0368	21.2104	24.6886	26.0549	25.9717	25.4361	22.4424	20.6801	20.4481	22.2158	21.5526	20.8816	22.8996	25.0822	22.0417	20.3895	25.146	24.5438	21.7666	23.9793	24.6704	25.3362	25.3624	26.3598	25.9993
TPPP	21.327	21.3383	21.9994	21.5482	20.3194	21.305	20.7197	24.376	22.8837	22.8791	22.7021	22.8955	22.9683	23.4501	23.2466	21.8242	21.2212	21.2943	21.2279	20.9909	22.5798	21.3355	23.7941	23.2293	24.3588	23.3317	22.6584	21.9462	22.4649	21.291	21.7049	23.9455	25.5842	22.6476	20.3366	22.0453	19.5574	23.8578	21.1394	21.4083	27.7599	27.7037	27.4517	28.0693	27.6094	27.5087	26.7229	27.8845	27.9068
KBTBB	25.2115	23.9931	20.9522	23.3817	20.4706	20.0793	22.9808	21.0148	23.9528	24.8513	23.4289	24.2852	19.8301	24.4958	22.6849	26.7141	22.7157	21.5572	22.4245	23.2469	21.4571	20.3969	21.4179	21.6952	26.8511	23.8069	25.4372	25.3416	22.7873	23.6744	24.6335	24.413	26.0462	25.5205	23.7362	20.4921	27.2286	22.5166	23.2308	22.57	26.9584	25.8952	25.4473	26.4064	26.3292	26.1761	26.7384	26.5018	27.4381
TOM70	28.4537	28.6705	29.1032	29.0014	28.8249	28.5842	28.5562	28.2032	28.9386	27.9538	28.166	28.5238	28.6164	28.3107	29.0972	27.7705	28.1104	27.3957	27.9382	28.9879	20.5517	26.8751	28.8257	24.9394	28.6301	28.0639	27.8834	26.651	29.0486	27.1265	26.2904	28.7836	28.7061	28.6017	28.2719	27.3279	28.4311	28.165	29.0473	28.7224	28.8518	28.9537	29.2456	28.2931	28.9985	28.9868	29.6272	30.0048	28.9538
K0754	29.3768	28.8853	28.2841	27.8736	28.7145	25.7634	27.951	27.8832	27.2532	22.2673	27.468	28.4707	26.6596	27.2103	20.9067	27.3449	21.6405	21.5004	21.1515	19.6522	21.3307	20.4662	21.2805	20.0091	22.3223	23.1092	23.6967	19.9254	20.5386	26.8104	21.3624	19.788	28.2452	28.3262	20.2725	20.9292	20.4913	26.3826	21.3113	26.6346	27.5886	28.466	27.4637	26.7149	27.6179	26.3014	27.8278	27.6557	27.5715
SC24D	30.7338	30.202	30.3348	28.974	30.4815	29.7065	29.6941	28.138	27.6411	28.3789	27.138	27.4901	28.6968	28.1282	28.2176	27.5659	23.5215	24.7333	24.8495	22.667	21.1155	21.2123	24.6305	24.6808	26.4312	27.2827	22.0695	23.9331	26.8506	27.7821	24.8214	21.5453	22.8024	25.2275	21.9255	21.1	28.5168	26.2364	26.3376	26.3621	26.748	26.1122	27.6816	27.7466	27.2385	27.4164	27.4885	27.6006	26.5422
FCSD2	24.1186	21.8337	25.2046	26.0145	24.6144	24.0996	25.2246	24.0002	21.2888	21.4554	20.2422	25.6308	23.6504	20.9822	20.3923	22.0404	19.3785	20.3628	19.814	20.8153	20.8622	21.4022	22.498	20.4223	20.8825	21.4701	20.8455	20.8482	21.7067	20.7625	21.5747	23.924	20.7563	26.403	20.0046	24.1215	19.6088	22.2034	22.5738	21.8656	25.9943	21.5699	24.0812	21.6303	21.9122	23.5739	24.7727	22.9549	22.5513
SRBS2	20.9259	21.6594	23.4851	22.3505	23.3901	19.7235	21	22.2009	25.7044	25.2593	21.6641	23.6384	26.2216	22.8926	23.5324	20.5679	22.8995	24.3742	23.6729	23.0862	20.0251	21.2706	21.7988	22.431	21.8575	21.7659	26.7137	22.9665	27.868	22.9165	24.8765	26.9579	27.6808	26.8421	28.1743	27.2385	24.8835	25.4386	24.8734	23.0561	28.3423	27.7788	28.0429	28.0622	28.2586	28.5773	27.9715	28.0361	26.5848
FARP2	22.0195	20.9076	23.3492	19.8902	23.7849	21.4257	22.5577	23.2845	26.9367	25.1999	23.4785	25.092	25.6211	24.7279	24.3386	24.6046	24.258	24.6219	20.524	19.9562	23.3737	21.83	21.2028	22.4888	23.8084	23.6077	21.316	22.7184	22.0142	25.7453	22.6294	21.4818	25.9113	25.4915	24.9921	25.0367	21.9159	22.6452	24.3855	22.081	26.0915	26.4146	25.4774	25.3694	25.9754	25.7333	25.6309	25.6104	25.7286
UBXN7	24.2365	25.1664	25.9008	25.5931	23.9993	25.1447	23.2028	23.7613	24.6458	25.4458	25.3841	25.1469	25.2869	23.795	25.8832	25.1885	23.2149	22.844	23.6449	23.1675	20.4566	19.5446	23.8886	21.0251	21.2267	21.7836	23.1735	21.5868	24.3148	22.9641	23.0778	24.201	21.5533	23.9454	21.5878	19.8651	23.6799	24.2517	25.3547	21.422	22.5182	24.3686	25.0127	25.276	25.3332	25.5647	25.5536	26.5429	22.6921
PROSC	26.8738	27.4503	27.7123	27.2512	27.5469	27.4441	26.9808	27.0962	26.0496	28.297	28.7728	28.2048	27.9725	26.9822	28.2764	27.0387	27.979	28.2517	23.2019	22.8354	27.3935	26.8761	26.2677	25.068	26.0708	26.4207	27.3079	27.4738	26.9725	26.2235	27.5286	27.6971	28.1474	27.949	27.8746	26.6863	27.4668	27.9709	28.4448	26.6991	27.7959	27.5721	27.5114	27.6533	27.4279	28.0411	27.9034	28.3656	28.0213
ABCA8	21.7389	21.4311	25.6347	23.5857	23.8773	22.2142	23.3396	23.6091	23.234	22.6542	23.8407	24.2245	24.7507	23.8178	24.9812	23.5446	28.2662	27.5519	28.694	29.8795	24.2381	23.833	30.3305	30.3291	29.6203	27.7829	32.1991	29.8638	27.4528	26.3208	27.4139	32.1191	31.8979	27.0327	31.6322	27.3301	29.5841	25.454	29.4648	26.0328	30.7897	31.4956	31.3176	31.6518	32.5071	32.7336	31.8504	31.7348	30.0097
PCF11	21.3403	20.9129	21.134	23.7486	22.3301	21.0397	18.6047	19.9242	24.0473	21.0448	25.7957	25.7996	26.2509	22.5818	22.3846	21.7951	20.9642	24.4356	20.8304	21.629	19.9128	20.614	25.6197	20.3855	25.8994	22.6474	24.222	24.6348	24.4723	20.7282	25.1153	24.9342	21.0479	21.966	25.0677	22.2498	20.4611	24.2297	20.9613	25.3648	21.0531	20.9123	22.0906	21.6112	21.2917	21.1634	21.2017	22.6339	21.3929
FRYL	31.0894	24.4994	28.6997	30.0937	27.2517	28.2791	27.0599	27.3087	27.3553	27.2122	27.9236	28.5058	29.5558	28.5471	30.9594	28.8314	25.3909	26.1489	20.3614	20.0186	27.7172	22.1337	27.4788	27.1608	27.6248	29.5586	28.8835	27.1937	27.0616	29.3958	26.2346	26.619	27.1384	27.112	27.4288	27.7918	28.6351	29.1587	26.7393	27.1371	28.0339	27.2865	27.2787	26.8565	29.1748	29.3179	28.6601	28.2484	26.6629
NFAT5	23.3711	23.7919	19.6597	24.0978	22.6182	20.9627	23.2342	23.9271	24.1937	25.5111	24.6537	24.0318	21.9846	23.6586	23.9017	24.6416	21.3694	21.5455	21.1781	18.6781	26.6216	27.0761	21.4732	19.1055	21.0373	21.2115	21.1838	25.0242	20.8771	20.4936	27.9037	24.2971	20.7493	29.1206	22.4283	21.2106	21.635	21.3543	21.8083	22.0668	24.4571	24.4942	24.4715	24.3015	24.2471	23.9358	24.8044	24.2306	24.5203
CDK14	21.6885	24.653	26.9545	24.8109	25.2164	25.2558	24.6603	22.6151	24.4672	22.3032	24.5964	24.9398	21.1111	24.1745	22.0705	22.5539	21.6581	21.4842	19.7418	22.4053	21.0439	25.3658	25.0688	26.3313	20.8465	24.1365	24.5252	26.2893	20.3836	20.4698	21.1693	20.5215	23.1703	22.9673	27.488	27.7044	24.2603	26.2842	21.7083	25.8893	26.1444	20.7149	20.9583	21.4432	21.6738	20.9999	24.0453	21.2146	21.8273
GLSK	29.8133	29.7471	30.5719	30.4422	31.0698	30.5235	29.8259	30.2185	28.5416	28.2082	28.5464	28.5328	29.0192	28.3774	28.8391	28.2797	25.935	25.0547	24.6705	25.8224	23.8507	21.8373	25.5255	25.693	27.6046	28.2683	28.8217	28.6146	28.0644	29.6362	27.8849	29.4015	28.7413	27.6289	27.8737	28.2384	29.0253	28.0776	29.2902	29.3948	30.9879	31.1811	29.5325	29.6897	30.3535	29.9495	31.4978	31.2718	32.128
ABLM3	22.4296	20.9842	22.3018	21.7501	22.1087	22.9326	21.9693	22.7436	24.9906	23.9057	24.6274	25.2509	26.3881	25.8495	23.916	25.3254	24.7787	25.1566	25.2438	24.6759	23.9256	23.033	20.5643	20.7918	22.4046	24.4942	21.8015	24.9066	23.22	23.0492	21.8374	23.3119	25.7102	23.1827	24.2637	21.4717	23.1163	27.0831	23.625	24.0871	27.5072	27.3989	26.9005	26.7738	29.7007	28.6901	28.9169	28.2316	26.6192
FBX21	21.9862	21.1838	18.5448	20.394	21.0454	20.5494	21.2789	21.064	23.7675	23.8568	20.6936	21.4006	22.2361	20.2999	21.9721	22.1594	21.2721	20.2689	20.4302	20.9596	21.8278	20.2797	20.128	20.1838	20.3613	20.7714	19.412	22.7563	21.0749	21.0728	20.4498	21.9977	20.4533	20.8225	19.9291	21.5234	19.6214	20.6201	21.4265	19.669	20.9293	22.2964	22.1723	22.0833	22.9534	22.6521	22.1863	23.9311	21.4783
WDR47	24.9573	22.6554	24.6658	23.9129	24.3551	23.8458	21.4181	23.682	25.7523	25.1446	25.0366	25.1738	25.4831	25.1764	26.7162	25.7091	23.2392	22.9172	21.0708	21.5277	21.209	24.1857	21.2298	19.6899	21.5988	24.9718	24.4382	20.8679	25.6233	24.2289	24.6917	23.3597	24.6239	21.2574	22.3933	21.1722	24.2835	25.3699	25.4184	24.2513	25.5412	26.8987	26.0089	26.4561	27.6842	27.4109	27.6691	27.8808	27.1218
AP2A2	27.5276	27.194	29.2561	28.7611	28.6348	28.0789	28.7231	28.1137	27.1636	27.4285	28.5077	28.0943	28.4585	28.0478	28.2152	27.012	25.9923	26.398	27.8187	25.4181	20.6052	25.6426	26.8535	24.1569	28.4684	26.6075	28.5729	28.9351	28.5191	27.4719	27.8017	28.9465	29.3823	26.9773	28.657	27.1909	28.5122	28.0433	28.6411	28.0333	30.0317	29.9982	29.8385	29.8017	29.7433	29.8305	29.8139	29.7197	29.7761
SC31A	31.9716	32.0636	32.3887	31.713	32.2144	31.2442	32.0381	31.1921	29.7046	28.1605	30.9702	30.2926	31.581	29.8735	31.4231	31.2763	29.5272	29.354	27.036	25.8795	29.2146	29.9326	27.2612	27.0651	30.205	29.7623	28.7796	28.954	31.0276	29.9037	27.9892	28.7666	29.0643	28.2419	26.6796	27.6768	30.6095	30.3547	30.7488	29.2777	30.0188	30.0318	30.4661	30.4643	29.9581	30.1547	30.2608	30.3355	30.7401
CSTN1	23.6703	24.3606	19.0086	23.9313	19.369	21.0492	19.8931	21.2867	23.9785	23.7597	20.708	24.5648	24.3715	24.0812	23.1173	24.5083	21.3293	22.3877	19.8938	20.3279	22.1332	20.86	19.7685	20.2623	21.8224	26.6674	19.2074	20.1671	23.7565	27.8541	23.132	26.5889	21.4487	26.7033	21.4059	24.7463	20.077	21.3603	23.621	23.9767	25.3936	24.4754	22.6174	21.1018	22.6177	23.1131	23.586	22.8644	25.8059
UBR5	25.1094	25.0799	27.9751	25.3144	21.9711	22.5035	25.4485	26.2013	23.8114	24.5182	20.8669	25.9178	19.8195	19.931	21.5011	25.2223	26.1844	26.28	20.1854	23.6863	26.3867	23.9015	23.4418	23.823	22.9659	24.034	22.1854	25.7237	23.4664	25.4922	25.1384	20.9326	21.0743	26.4985	23.372	25.4207	24.6087	26.8108	24.0833	24.9663	22.3938	21.9081	23.622	22.8586	19.4336	23.4865	21.0157	23.7727	22.2732
AGFG2	21.3561	19.6041	22.8769	21.0291	21.8812	22.1067	19.2547	21.3916	22.7375	20.4675	20.0107	21.2935	21.2099	22.8922	21.2446	20.5314	21.4318	20.8957	20.5768	19.4097	22.7034	19.6908	21.0584	21.7267	23.6043	22.1077	20.516	19.7007	20.4462	22.4249	23.6556	23.604	20.6177	25.2062	20.283	20.331	21.8144	20.2694	20.7744	20.3205	23.7865	24.8613	23.1318	24.5851	23.797	23.9825	24.7455	24.8124	24.7921
SFR15	22.9926	22.9929	21.4907	22.6676	19.1907	21.5833	22.23	20.5592	24.4278	23.9247	21.7372	22.0458	20.7577	19.6874	19.0357	21.0024	20.617	21.078	21.7902	19.7722	20.5699	20.0414	19.5388	20.4879	23.824	23.7323	20.7294	21.2103	22.3548	22.1928	22.5575	21.1833	22.3109	21.1262	21.1923	21.0879	19.6074	23.2285	22.5846	23.1794	21.1454	21.9432	24.9997	25.2992	25.3552	25.3201	25.9079	26.2896	22.9735
S1PR2	20.3445	21.0736	20.1943	20.7018	20.5089	21.1803	20.5149	21.3392	23.5002	21.3879	19.2418	21.3909	20.7363	21.8378	20.0219	21.6951	20.1977	21.2513	20.2452	19.6409	19.3405	19.9144	21.9613	19.5048	20.8756	24.6547	20.399	21.432	20.2783	21.089	21.2948	22.3797	20.9798	20.8783	18.7591	21.2226	20.4292	20.9828	19.3393	21.1067	20.5627	23.5043	23.3631	23.7212	23.4594	24.0046	23.6672	23.9724	22.5961
MFN2	25.8362	23.4042	25.8365	26.6962	27.1012	26.7823	25.8945	25.8797	24.7284	25.4338	26.9935	27.1584	27.3214	27.1989	26.5658	26.8994	21.4608	21.9215	22.5349	21.5576	20.3761	23.1058	20.6181	25.4928	25.4603	25.7678	26.34	25.9909	25.8522	24.7154	25.6227	25.7843	26.2726	26.2548	26.2904	25.5528	26.5288	26.5052	25.7126	25.5753	27.2346	27.7736	27.1533	26.3062	27.9776	27.5615	28.0361	27.6691	28.3474
ZFPL1	19.8623	20.7055	25.2924	24.7739	25.089	24.905	24.2868	25.1617	21.3339	19.8961	22.5483	24.6039	24.3508	21.054	22.2133	24.2964	21.2673	20.834	22.6467	20.2551	19.677	21.3013	21.8526	21.3243	24.8154	20.8273	20.935	22.5679	22.5012	21.9171	22.4873	20.5191	23.3174	23.1658	20.4898	21.5993	24.3901	22.8593	23.337	22.0028	24.2193	22.3531	22.3058	22.6323	19.4442	22.0598	21.6005	22.1999	24.9891
ELP1	27.358	27.2994	26.641	26.237	26.5132	24.393	25.4513	25.6277	26.8862	26.9754	25.4855	26.4127	26.5381	25.1273	24.6991	25.1548	22.8409	24.5676	24.5863	21.6575	25.2002	20.5085	20.2807	22.7016	24.5984	23.7757	22.4068	22.5332	25.8663	23.7259	21.0541	23.5897	21.3576	23.7994	20.5358	21.4862	24.9917	26.4891	23.3692	23.6456	25.5909	25.6466	23.1018	25.6483	25.0623	26.7402	26.0564	25.4989	25.8723
GBRAP	26.8382	24.1813	22.2097	27.4765	21.3459	22.9346	25.5429	24.3023	22.8784	26.764	26.978	25.5855	22.7021	27.0066	25.9591	26.5918	21.182	26.746	26.6894	26.0047	25.3762	25.6754	22.6104	20.0511	24.362	22.3373	26.3973	27.0748	26.0348	24.3061	26.9887	26.8489	20.1732	25.3458	26.3452	25.7005	26.4239	22.5907	26.6455	20.3851	25.6851	21.0551	21.051	22.2878	22.2525	20.6607	20.8834	20.9884	20.6269
NDUB8	21.2144	20.9428	25.6678	25.8713	25.2648	24.7585	24.5066	24.6951	26.712	23.5483	25.7805	25.4504	25.1106	25.3064	24.6109	25.4421	24.9346	22.8909	19.3291	20.429	19.9018	23.6547	26.2585	24.2786	25.4804	24.047	25.1705	24.2787	25.5752	23.8811	25.3619	25.5687	25.8041	21.7806	25.4572	20.525	25.3426	22.9866	25.938	24.2593	25.6178	25.4676	25.4589	25.568	25.3551	25.5623	26.2627	26.3742	25.0897
RTN3	25.6139	22.2532	29.3072	20.741	28.9776	25.7483	28.3787	27.5927	28.8027	28.8308	28.7972	28.9041	29.5893	28.408	29.0268	24.79	30.538	30.4106	29.9134	30.0841	29.7548	29.6073	30.3252	30.3825	26.6693	24.552	30.0562	25.8431	29.6362	28.0085	28.4075	30.2384	30.6949	21.7485	29.5723	19.4025	29.8229	28.9658	28.5804	28.6798	31.5565	31.757	31.1221	30.3947	30.7931	29.7425	30.8052	30.7937	29.3006
MTMR5	24.0773	24.8085	24.0956	24.5336	24.5258	24.7518	24.471	24.5077	25.0311	25.8871	23.1612	24.6031	25.5195	25.2338	25.5211	25.3298	24.1835	25.8902	25.3337	25.9146	22.3309	22.4858	24.5617	20.2762	26.5819	27.1524	27.0741	26.9277	26.1078	27.4259	29.1275	25.9339	25.7772	26.5406	26.7086	27.5547	26.2587	26.1988	25.6041	27.1655	27.2001	27.6134	28.0357	28.1299	27.0507	26.9366	28.3647	28.1033	28.787
KAT7	19.9749	21.6101	18.7708	20.7049	22.7536	22.0142	24.5671	22.3562	21.8818	22.9905	22.6881	23.2286	22.9345	22.0367	18.704	23.2873	20.8758	20.9457	19.8829	21.7276	19.724	21.2764	19.6864	20.0061	20.958	21.1949	22.994	21.3072	22.3777	22.729	20.9708	21.2132	22.4573	22.2035	23.2139	21.2658	17.2392	21.8983	20.1994	20.9912	22.1276	22.4409	24.4801	22.6572	21.0441	23.1285	24.8335	21.2636	23.019
MPZL1	26.8002	26.8921	27.7677	24.3385	28.8198	26.972	26.7889	21.5852	23.95	22.7243	21.7141	25.2457	22.1789	21.6771	21.5051	23.7861	25.9868	26.3195	23.6401	24.8512	23.4851	26.0827	22.7556	25.2244	26.2227	21.439	20.4508	24.3249	21.0801	23.8544	24.2366	19.884	20.9931	20.3742	23.666	24.3651	21.4798	24.0024	22.2108	20.8757	21.7551	26.9353	26.4179	27.3082	26.104	27.2086	25.4663	22.2061	25.729
FKBP9	29.3426	29.7376	30.8367	29.0662	31.2956	29.1981	30.9409	29.4981	27.0706	23.7881	29.0823	27.7387	29.03	28.1005	28.0034	27.7683	21.9535	23.5455	22.6431	21.3894	20.8805	21.5423	21.9195	20.7177	27.055	25.5377	25.2634	22.2032	27.9036	27.5367	25.4322	22.9292	26.1296	25.0588	25.085	26.4643	27.8228	27.4023	27.3168	27.8994	24.7509	25.6303	25.5578	26.576	26.2511	27.0272	26.9715	27.3371	27.1563
ABCBB	19.655	27.2988	28.0643	24.1978	28.213	24.0946	26.9229	21.2063	21.6338	20.4186	26.8603	25.1819	22.2889	20.5935	27.0937	23.9725	24.9186	28.4845	24.8947	27.6481	20.2487	20.6568	21.3117	26.2733	27.5928	25.1262	25.1612	20.6849	22.1814	24.0527	24.2973	22.6167	21.35	24.8083	27.2954	24.4257	20.9826	24.8043	20.6545	27.5704	21.6179	20.6224	22.0383	22.3752	21.3487	21.7996	20.7133	20.8201	21.0002
ATG7	25.2809	26.0251	25.7568	26.5436	27.0938	26.4227	25.2126	26.1178	24.878	26.5955	25.146	25.9921	26.705	25.557	27.0091	23.738	22.9386	21.2983	24.2593	27.0655	24.4803	21.2104	26.0973	24.2238	23.0746	25.0803	26.5779	23.8093	24.9015	25.015	22.9036	25.7121	25.8423	25.572	24.0217	23.1905	23.1959	26.0335	25.9406	25.3439	27.2877	26.8049	27.293	27.3714	27.361	27.1749	27.9485	27.8211	25.8463
TRI16	22.9839	21.409	24.4413	23.0122	24.2358	23.4955	23.3433	23.7008	22.8528	23.7382	23.629	24.1029	24.098	23.8763	25.9477	24.1763	20.8145	20.3261	23.0248	20.2199	21.0552	20.9491	21.8756	19.9028	23.4312	19.7212	21.4962	20.242	22.5868	23.6809	20.3184	22.0206	24.0119	23.8537	24.835	23.1993	21.4839	22.812	19.661	20.7992	25.8768	26.0089	25.1469	24.9198	26.7772	26.798	25.5127	25.965	26.6497
LYPA2	25.1012	25.5702	26.5616	26.6978	26.3373	22.6647	25.7599	21.541	28.0258	28.1608	27.3328	27.0553	27.4872	22.9554	19.9654	26.9066	20.289	21.7169	21.5314	23.3294	21.2049	22.5034	22.6666	19.1565	25.1715	26.5455	27.5081	28.1031	25.4862	24.9429	25.6516	26.0458	26.0133	26.0171	23.0042	23.3631	26.4574	26.2916	26.1969	26.5137	26.8022	27.2867	26.6655	26.5782	27.1906	26.9863	26.9224	27.414	26.5916
IPO7	30.4792	30.5018	30.5553	28.2988	30.2495	29.4701	29.5928	28.964	28.8282	29.7829	30.3053	28.9182	29.6956	28.4101	29.6834	27.0474	25.2547	27.1419	20.6433	22.2566	25.8284	22.3643	20.6396	19.1962	29.9544	28.6124	28.0566	26.5294	29.0302	27.2571	23.1944	26.14	26.6584	24.953	27.8576	25.2602	28.5434	26.9497	29.122	27.9036	28.8435	29.0691	28.0314	28.4881	28.8608	29.1457	28.9021	28.6135	28.1112
ARI2	25.6946	21.6472	24.8992	26.4675	25.1236	25.581	23.7951	26.165	23.7008	25.0419	26.1665	26.2092	26.2032	25.9754	25.1785	25.7785	22.8592	21.6733	20.6389	19.9532	19.839	20.4745	20.6813	20.3958	24.0488	25.3577	20.8712	24.3504	24.3275	24.8285	23.329	23.7714	22.7446	21.4581	24.133	20.6881	24.8417	25.4128	24.709	24.6653	25.0596	23.1074	23.2631	24.6598	25.1945	24.3147	25.4286	23.4805	22.7842
SLU7	24.5342	21.5305	23.0877	20.6809	20.9191	20.9907	20.8772	21.8072	21.2819	21.6161	23.9087	23.6701	21.2244	21.3786	21.0108	24.5275	20.4791	23.2264	21.0814	22.9853	21.6022	20.2165	23.8019	20.1617	21.2457	23.6849	21.2348	22.3848	21.3437	21.9612	22.0668	19.1551	19.582	22.3609	22.3106	18.5031	24.0409	20.8808	20.7325	22.4699	21.8464	23.0543	23.9223	23.9092	23.5348	23.277	24.4297	23.4362	22.3665
MOCS3	21.087	24.1993	21.3476	22.9313	23.3414	21.805	19.9568	22.4779	26.092	25.9764	22.5559	24.2786	24.681	24.7365	20.5061	24.1843	21.3224	20.8566	22.0705	19.6776	19.6868	19.9499	21.1315	22.2924	23.3781	23.3651	23.8466	20.8885	22.9004	22.0796	21.7587	25.409	23.8741	25.0668	21.5665	21.2983	22.4727	25.484	23.4298	23.2963	24.2088	24.3334	24.1137	24.2792	24.3639	24.4818	24.6539	24.8375	24.5409
UTS2	21.2862	21.2705	20.0709	21.9318	19.7552	21.7063	20.8193	21.4631	21.2118	21.5863	21.2886	22.0178	20.5959	21.0532	22.0828	22.0805	19.9655	19.6878	21.4315	20.5237	22.5049	20.7683	22.1378	20.0028	21.2397	21.2212	19.076	21.0027	20.5816	19.5412	20.6662	22.2109	20.2569	21.9557	20.7653	21.1908	22.5365	21.2993	22.2252	22.0762	24.6764	26.5158	23.626	22.1952	21.706	21.3676	26.7742	27.8421	26.74
CD2B2	20.013	19.3307	23.0706	23.5404	23.2073	23.4111	20.4522	21.4608	23.1704	22.5767	23.1256	21.5813	25.1476	24.6285	24.922	23.5458	19.0453	21.3689	21.2338	21.3826	20.4649	21.599	21.4877	21.2726	20.5603	19.9793	20.9468	23.2002	22.7197	25.4961	20.3611	22.4269	23.712	23.9277	19.4068	21.1356	22.6704	24.8094	23.4413	23.4477	24.7732	25.116	22.8748	23.4788	24.8778	25.1001	22.4658	24.9925	23.8802
SVIL	24.5563	25.208	24.6912	23.6852	24.4929	23.2013	24.7641	25.1154	23.7737	24.0939	23.8411	25.3728	23.8118	24.2498	24.4579	25.3462	28.3182	25.4231	26.5007	27.0521	25.0452	20.1177	25.7833	20.8585	23.2188	24.7199	21.1377	25.5468	24.7696	23.6144	25.3393	23.4307	27.1024	27.4491	22.7771	21.8303	22.9486	21.7023	25.4938	22.576	27.2114	28.2824	30.1527	30.1365	25.6132	26.0369	26.1381	25.4544	26.4197
AHSA1	28.5089	28.5795	29.4087	28.4285	29.0133	27.938	28.5619	28.009	27.9474	28.457	28.7317	28.5254	29.0105	28.6576	28.0319	28.1636	21.4574	22.171	23.9378	21.5627	25.0441	20.5887	24.0975	22.5423	25.4474	26.5922	28.8045	27.8298	29.0025	27.4482	25.2388	27.408	27.9891	27.2695	27.1637	26.6915	28.2333	27.7193	27.8671	27.3187	27.5104	27.8608	26.9077	27.6873	27.6927	27.7039	27.7914	27.5089	28.0998
APOM	19.2282	21.2409	21.2004	20.7507	21.2368	25.1035	21.714	21.411	24.0224	24.596	24.2498	24.4504	19.8335	22.3758	21.9958	21.2703	21.2761	21.9489	20.6193	21.0013	20.8889	20.7252	19.6485	26.2871	20.9613	20.9051	19.6664	21.7777	23.1984	19.8065	21.4845	21.0828	19.9894	22.8408	20.7571	20.8342	19.7622	21.1561	20.592	19.6933	24.9315	22.3881	22.2527	21.6327	21.1883	21.5753	21.4972	21.596	23.7078
FMNL	21.2809	24.0823	21.2775	20.6298	21.1232	23.8118	20.4023	22.9225	24.1814	23.2686	22.5832	21.7794	22.8905	20.9061	21.7161	20.4205	20.3096	20.307	23.5058	20.4791	20.1062	20.2133	20.6613	18.9912	20.6533	23.6595	20.8164	20.8015	19.3009	20.802	21.8424	21.4671	20.8531	21.447	20.8225	21.9196	20.8064	21.0218	20.2001	20.0227	24.4728	24.9498	24.2729	25.1235	24.9406	25.5768	26.8261	27.5956	23.4296
ABCA1	22.3645	27.5349	25.618	23.518	24.7313	26.2182	23.2235	20.3348	25.6957	26.3046	24.5225	26.1884	26.1308	25.8153	24.8321	26.5956	24.7577	25.0662	25.54	26.2257	24.4936	24.9082	24.2671	21.432	25.0525	25.5015	20.1616	20.4347	25.5183	25.4672	24.4961	24.1994	24.6826	19.818	21.7216	25.2225	27.4831	25.03	26.6263	25.8397	25.8647	26.9032	26.0941	25.3878	25.0164	25.9729	25.7335	26.11	21.283
G6PE	28.591	28.7529	28.6517	26.66	28.2356	27.8222	28.6725	27.6386	27.5703	25.798	26.6116	26.8817	27.2152	26.7762	27.6114	27.8088	21.6921	26.3592	23.3246	25.2563	22.333	23.356	23.6561	21.6517	26.0768	27.0636	25.912	25.5011	26.5019	25.8276	24.5819	26.7634	27.3046	26.8891	26.6755	25.8619	27.1409	25.6561	27.5846	26.4752	27.632	26.2459	28.6742	28.446	27.6355	26.9953	26.7087	26.8918	27.4887
SC24A	28.1667	28.6349	28.4609	27.6885	28.8364	27.8681	27.2666	27.1356	27.3088	28.0956	27.0316	27.2559	28.4721	27.4907	26.0452	27.4019	22.6321	23.5286	22.8236	22.9685	22.9679	25.5794	21.959	22.5453	28.4097	28.2829	23.3613	22.7611	28.265	25.7261	21.2517	20.6746	24.9243	23.6206	24.8204	26.1708	27.8501	26.391	25.9224	27.1679	25.7321	25.9761	26.2502	26.4387	26.3505	26.3283	26.3469	27.0815	26.2476
SC24B	26.846	26.6381	26.5985	26.0344	26.5152	26.5481	26.1696	25.9283	25.3302	23.227	25.8456	24.9308	27.3178	25.9679	26.3726	25.7719	21.6488	21.4454	21.5604	21.2443	22.8024	19.6683	20.9563	22.6631	25.6557	20.4976	25.1814	23.8203	22.9342	25.9818	20.9011	25.5909	24.8061	23.7322	26.048	24.4276	25.402	24.1081	25.751	25.3941	24.7008	25.9406	26.3108	25.9665	26.442	25.6561	25.7278	25.7158	23.9241
MPC2	20.961	26.0356	25.1111	25.0924	26.0147	20.5996	26.3005	26.6686	26.6432	26.5535	25.4285	27.1088	20.6352	21.9472	20.4519	27.7437	19.6751	20.571	24.3474	22.0224	22.4015	20.3475	22.5249	20.9611	27.0339	27.4758	19.8191	20.942	27.3499	25.8847	24.5938	21.1425	27.5659	22.0185	28.2596	27.6139	26.8409	26.5152	27.0245	24.626	22.5868	21.8066	21.0774	23.6084	20.673	21.3991	21.8532	21.5203	22.05
ACSL3	28.9055	28.9728	29.7443	28.8556	29.3915	28.6359	29.1326	28.7899	29.8592	29.0431	29.8621	29.0904	29.6411	28.9121	29.7004	29.4257	28.9685	27.2039	25.7757	23.7766	28.3421	28.3655	22.7384	28.1986	29.797	27.5622	27.5688	27.471	29.285	27.6014	28.0602	27.5658	26.1807	26.5251	27.4497	26.7806	29.5862	28.1221	29.3264	28.2379	28.3859	28.8105	28.1997	28.5661	29.2752	29.0872	29.4989	29.2913	30.047
CNOT4	20.3841	24.2362	24.1982	24.3864	23.7107	24.3822	23.3433	24.9507	25.9334	25.7174	24.9581	23.8143	24.1459	24.5714	23.7804	24.008	20.6741	20.9583	20.1825	20.0886	19.6544	21.5846	20.2169	22.6133	19.6886	19.8057	23.9101	24.3625	24.4864	23.7699	21.8635	20.6662	23.8846	22.359	20.295	20.921	23.9201	23.3366	20.9488	25.5101	21.7844	23.8758	21.5202	24.0254	24.5008	24.2402	23.1509	24.3696	23.4345
VATG2	20.9079	21.4651	26.4368	20.9089	19.3306	23.0144	21.3367	21.0828	25.2547	22.3671	20.908	25.6636	21.652	22.3428	20.5316	25.9999	20.8579	24.8347	26.0365	26.7535	20.5612	21.5785	22.5655	26.646	21.2482	21.5499	25.2644	21.2839	20.9746	22.303	24.2912	25.4364	20.476	24.4255	24.8135	20.1688	21.224	25.1924	22.1231	21.8841	27.0562	27.1032	26.1713	25.7232	26.224	24.6531	25.513	25.7895	27.4835
ASML	28.1105	27.0592	27.1865	26.9312	27.0952	26.6239	27.8077	27.119	26.6838	25.5025	27.589	27.1537	27.0277	26.9216	27.2244	26.454	24.9282	24.8186	21.5538	18.9508	22.5722	20.3226	25.0531	19.8785	26.7154	25.0272	24.8756	25.919	26.4799	24.8421	22.2153	26.4956	27.4081	25.2479	26.3766	27.2611	26.1046	24.2736	24.3458	24.4522	28.2444	28.0618	27.3532	26.2737	27.6707	27.7659	27.3198	27.4831	27.8567
ECEL1	24.2869	22.9094	20.4611	20.6415	20.2799	20.8554	22.0783	23.1044	26.7655	26.171	20.3099	19.707	25.4985	26.555	24.4049	23.0448	22.4925	20.447	20.8567	18.8093	21.5811	21.7884	19.9801	21.0525	19.1822	24.0091	22.2803	22.4407	21.2851	21.4104	21.407	21.6552	19.812	23.3119	21.2523	21.4649	22.2281	23.4128	21.8284	20.9049	24.5762	24.5315	25.1872	24.6432	25.5993	25.2988	25.4097	24.9042	24.1691
CDS2	20.1487	19.685	24.2439	24.7109	24.546	23.9854	26.1818	22.0174	26.6348	26.8526	26.4958	27.0124	25.7881	24.627	26.2539	27.5933	26.4317	27.4457	26.4153	26.0144	25.4648	25.673	26.466	26.1665	27.6167	27.0371	25.9557	27.7299	27.3589	21.4261	26.4928	26.7332	26.7086	27.0487	20.8715	24.5256	25.7399	25.7394	25.3259	21.1704	27.9259	27.9064	26.5799	27.2609	27.4364	27.6139	28.0154	28.1315	29.4101
FR1OP	25.3639	24.4334	22.9842	25.0007	20.8233	24.3618	20.5967	20.7539	22.6282	21.3411	19.906	20.9928	20.782	23.2252	19.1426	22.5958	20.2906	21.2139	22.4909	20.0629	19.2307	21.7519	21.24	18.2775	22.4846	22.0433	19.1307	21.3379	26.6085	20.7901	20.5441	21.0397	21.4394	21.1409	27.3962	22.5098	20.5702	21.5308	21.0528	19.5294	24.2481	23.4626	24.778	24.2015	24.4595	24.342	24.5161	24.5302	24.7255
RAB3D	22.4793	22.5756	20.1348	22.0158	20.8797	21.9678	20.9509	21.1949	25.5107	25.2115	22.0209	21.4791	21.4546	21.2995	24.7466	22.1326	21.4223	20.5226	20.5517	20.6016	22.7575	21.2388	20.3669	20.4085	20.5804	23.1729	19.7664	24.0849	22.7462	22.6052	23.9168	23.5907	23.5846	24.9219	24.6944	24.2636	21.877	22.1776	19.5458	23.1839	24.4299	24.5015	24.4522	24.5092	23.6744	24.0642	24.184	24.7446	24.6498
SNP29	27.3944	26.8586	26.4441	26.5915	27.1486	25.9717	27.0735	27.6598	26.3986	27.6849	28.0455	25.9646	27.8525	27.2284	27.164	27.0022	25.6611	25.957	20.6871	25.5947	26.7636	23.8052	22.421	26.4794	24.0208	21.8827	26.084	25.0137	26.4146	24.0685	24.3866	20.5634	25.9373	26.0566	19.4986	25.463	25.107	26.2341	25.6792	26.4946	26.5843	27.2261	25.772	25.2741	25.54	25.0567	24.0861	24.1908	27.3912
HS74L	24.5481	25.8509	27.2506	25.9558	27.4609	26.4146	24.8426	25.9891	26.96	25.89	27.2389	26.8573	28.0831	27.1453	26.8123	26.4495	24.9022	23.487	25.5517	24.9658	23.4788	25.6475	24.0052	24.0808	26.7831	25.6239	27.2542	27.0891	26.2825	26.5697	27.3295	27.7954	27.9256	27.9716	25.6617	26.2596	27.4031	27.0952	27.2983	26.4841	29.9027	29.6788	28.633	29.0555	28.4393	28.4108	29.0214	29.1275	29.9556
PTBP3	21.7075	21.8555	22.9178	21.6563	20.7699	23.2432	21.5607	22.032	22.1576	21.895	20.6023	24.2827	21.0335	21.5821	21.0341	24.2406	21.1911	21.9436	22.3488	20.2489	21.7493	21.5201	21.4379	20.9137	19.7472	21.5754	24.1884	22.1873	20.5055	23.1464	21.2142	23.1053	21.2798	21.5154	20.3001	24.172	20.4335	21.8321	20.6724	21.2985	23.0793	23.4324	23.5198	24.2484	23.8787	24.4731	24.7918	24.6921	23.2627
IL33	23.1469	22.8071	20.3419	21.2085	18.9085	20.9751	19.2593	20.3267	23.116	21.5582	20.5185	22.7008	21.0174	22.0706	20.6368	21.8999	20.5531	22.1166	20.1793	21.0102	19.7689	21.7283	20.7817	19.8087	22.0423	21.2661	20.9259	21.4225	22.814	21.1621	21.6332	18.6172	20.4062	23.1399	17.7391	22.4393	21.1386	20.7561	20.5359	20.3997	22.5343	21.2271	24.6445	24.675	23.2399	23.3339	23.5899	23.8667	20.1289
MENTO	21.1467	18.8207	20.0939	21.4972	21.09	22.7607	18.2235	26.2004	26.5553	26.7184	27.1574	24.058	24.9081	26.8783	25.6926	25.7611	20.8499	21.3902	21.3825	22.5282	20.836	25.3736	19.6637	21.4154	24.1061	21.0204	21.6074	21.1485	19.4869	24.2087	22.3691	20.1924	21.9096	22.1805	20.9083	20.4249	21.79	21.9704	21.1921	22.0345	20.9971	24.2299	21.6933	19.8097	22.3609	21.2088	21.6287	25.4579	26.0287
LSM8	27.3189	27.1107	25.7699	25.9282	26.042	22.7443	26.1044	21.5575	28.0312	26.4147	27.2083	27.016	26.9156	27.4032	19.4697	27.412	26.8022	27.0208	24.7972	26.3037	26.0671	26.5106	26.641	26.5373	20.2211	24.6502	20.3067	23.5109	24.1	24.4767	23.5789	19.516	25.8065	25.2943	20.7864	21.2931	25.3986	27.4305	25.4195	24.9364	26.4819	26.6395	26.7826	27.1187	26.6958	26.803	26.9317	26.9659	26.9204
AP2A1	30.537	30.437	31.4842	30.7055	31.209	30.7455	30.6208	30.3146	29.8687	29.7327	30.427	29.6197	30.5451	28.225	30.403	29.5875	29.0193	28.8107	28.6409	27.5966	27.1826	27.9366	27.8673	28.012	30.5108	30.2569	30.1173	30.3916	30.5141	29.3623	29.7562	30.1852	29.921	29.536	29.5493	29.0526	30.2187	30.2941	30.5124	30.0432	30.8508	31.0039	30.9229	30.7564	30.7253	30.9513	31.0347	30.9992	30.3265
DDX58	24.1532	23.695	26.3201	25.845	26.4453	25.7264	25.3944	25.6273	26.1374	24.2651	26.9363	27.4974	28.0667	27.3587	28.3122	27.586	25.65	26.7423	26.6671	26.3627	26.0652	26.3424	25.1691	25.2173	25.732	26.0424	26.5362	24.1254	26.0945	25.4338	26.3366	25.0966	25.4773	26.9695	26.5983	27.3419	26.7313	26.8751	26.2392	26.6181	28.5703	28.6275	29.6324	29.3223	27.9478	27.9178	28.0098	27.431	26.7439
TTC4	21.8432	22.5556	24.0228	21.3676	25.5709	24.3471	21.2947	24.5818	22.7433	24.5864	21.8158	25.1686	25.4674	20.9746	19.6338	22.903	21.3877	19.4329	19.6388	21.5163	21.1227	20.5039	21.0386	21.1215	23.0675	21.1976	20.7409	20.1385	19.6863	21.1288	20.7883	20.7835	19.6744	22.2287	20.7365	20.7623	24.5008	22.2357	21.9919	21.425	23.8711	21.6647	19.9328	21.834	21.5624	21.9812	20.8837	21.3242	25.1763
SDPR	26.0271	26.3877	32.1606	27.6962	29.1891	27.9362	29.8241	26.426	22.9614	25.2488	24.1305	25.2879	23.1661	22.3401	22.4249	25.4944	29.6215	20.5583	24.5341	20.2503	24.653	21.2161	27.0168	25.0183	25.0637	26.5592	31.6677	29.5003	28.6568	25.8684	25.0715	29.7498	27.433	27.6972	28.7147	25.3635	23.4483	24.2806	23.8854	24.8646	26.8087	24.7786	30.6326	30.7502	29.1958	29.325	30.0931	29.8456	26.4654
BAG2	29.7809	30.2348	29.5716	28.9138	29.7461	27.9248	29.827	28.1673	25.8557	25.6795	25.7572	25.5031	28.3596	28.1277	27.858	27.4465	21.0742	22.3558	23.0127	19.8271	20.493	20.0697	20.3491	21.1144	23.2426	22.9432	24.8828	24.0918	25.5389	25.5953	25.1845	23.3982	23.5573	21.9346	21.3447	21.5907	23.9434	23.3346	26.158	20.1064	26.3779	26.2192	27.0373	26.4533	25.2158	25.4107	25.7072	25.8167	25.6382
M4K4	26.8609	26.5528	26.5069	29.1612	25.4319	28.8114	24.2919	29.8961	26.7558	25.9391	25.3163	29.0751	26.8304	27.0147	26.8734	29.7102	25.7701	25.3795	24.9941	24.0701	24.0846	24.3159	25.105	24.6068	27.156	26.463	25.7389	26.2514	26.5377	24.3458	23.56	26.1061	26.7626	25.3839	22.1962	23.4581	26.916	27.2521	25.627	25.1272	27.5571	30.4536	26.0311	26.0707	26.8805	27.7951	26.0193	27.5262	26.9984
QORL1	26.1575	23.2352	26.1494	24.6433	24.7377	24.3081	22.2239	24.7108	25.6408	25.2817	23.4904	24.2991	21.4538	24.5077	22.8047	24.8034	20.938	23.6492	23.8685	18.2458	22.7096	19.7519	21.9141	18.8757	22.7815	23.7957	23.5213	21.7336	22.4762	24.1016	21.2358	23.8617	20.4811	24.9721	21.5114	25.3439	22.0221	20.8245	21.3295	21.6127	22.0095	26.6737	21.1726	24.7159	26.0718	25.6521	26.0218	25.9788	22.7184
LATS1	23.2881	21.4594	20.0667	24.2485	24.2151	23.68	20.5358	23.9516	24.8167	23.9935	20.6127	21.1137	20.2709	26.7103	24.0042	23.6909	20.605	26.9281	26.6674	26.5613	20.4945	20.4949	26.5595	26.0265	21.2283	19.9716	28.0042	19.5157	19.1736	19.9346	22.4532	20.1214	21.0932	26.2248	20.3821	27.0573	20.8697	22.7453	21.5335	26.8517	22.7683	24.6061	20.9834	21.1669	19.7894	24.9808	22.3931	21.5515	21.5985
BPNT1	28.1282	28.3684	27.8857	27.44	28.7833	27.5405	28.2522	27.4563	27.8559	25.4375	29.0822	27.2351	28.7997	27.5887	27.74	27.3374	25.8742	23.3597	20.5334	22.7303	26.0038	26.3011	23.6738	22.7774	27.1607	27.1881	28.3461	26.1416	27.3493	26.8344	26.8663	27.5641	27.1857	25.07	26.8761	24.285	27.7703	26.4929	27.5653	25.3714	28.6956	28.219	28.6914	28.2371	28.008	28.414	27.2864	28.1366	27.1704
FADS2	24.8011	24.8162	25.493	24.5962	26.2302	26.1877	24.2823	25.4266	24.46	21.5057	25.1953	25.5016	27.4529	25.9534	26.3662	24.8526	21.6671	19.7618	21.5395	22.6978	21.2106	21.1836	21.5915	20.8732	25.3522	24.9671	20.4634	22.1008	26.3969	25.0106	21.896	21.6529	23.2477	22.6795	21.6127	20.8579	25.0176	25.7871	25.0619	21.4283	24.532	25.0003	20.9019	24.7116	24.7414	25.0732	23.4848	25.5513	26.1932
DDAH2	28.2056	28.1801	28.4684	28.2311	29.1182	28.9856	28.9621	27.9881	25.2563	26.3307	29.3773	29.1491	29.2664	29.018	29.7838	28.6593	29.4756	30.489	27.3664	29.6784	29.5718	29.5198	27.701	28.9721	29.6374	28.8396	31.0392	27.1229	29.8973	28.7082	30.9344	31.1575	31.4768	29.1506	31.4431	30.7857	31.0264	29.9765	30.6857	29.1547	31.1741	31.072	31.1292	31.3505	31.1907	31.2874	31.2311	31.1237	30.6343
ABHGA	21.3776	19.8966	24.0408	23.1407	22.3691	22.0434	23.3632	21.696	25.88	25.1704	25.6327	25.4469	25.3576	25.2518	24.4583	24.8002	25.2431	23.0692	26.6987	20.2411	23.9064	21.0835	23.4194	18.6513	25.1919	23.9619	25.5589	24.6765	25.19	23.1786	24.8468	25.9629	25.499	25.6108	24.0151	23.5559	24.6736	25.0192	24.5766	24.3215	26.4188	26.1663	25.4848	25.6964	25.4651	25.686	27.342	27.1877	26.9537
FBLN4	22.3359	24.6957	26.9306	26.7393	26.5198	23.4686	24.4831	25.1139	24.8237	21.5714	21.2346	25.0138	19.4667	20.6453	19.6436	22.7123	22.0895	24.711	20.2877	25.2162	26.9119	21.282	26.5931	26.623	22.2854	23.9054	25.8405	25.6452	20.2961	20.7038	27.1539	26.4995	27.0625	27.2687	25.5273	26.0127	23.0272	20.4157	20.8119	25.6833	27.7831	27.6132	29.1013	28.9133	26.8145	26.2791	25.2161	26.3988	28.6788
MBD3	18.9563	20.5723	21.2282	21.0559	21.1992	20.55	18.874	22.6237	21.9137	22.9158	21.7645	21.3955	18.9744	21.3172	20.8153	22.7134	19.4217	19.5848	21.7055	21.8709	20.592	22.2596	20.8498	22.8873	22.2487	21.5575	21.4457	19.1814	21.171	19.9813	20.2395	17.5717	21.7002	21.2956	19.7123	20.3915	20.1681	20.0618	21.9328	21.9802	22.3047	22.3866	22.2627	23.4282	22.8492	23.4321	23.3915	23.7427	22.1539
CLPT1	26.0403	21.8904	26.0087	26.0985	25.6943	25.7615	26.7448	26.5851	21.2373	25.3993	26.2113	25.8892	27.5266	26.3497	25.6153	25.7867	24.3619	20.314	19.7518	20.4913	21.5591	19.1366	25.1613	20.2771	26.4483	25.1148	20.3672	20.611	23.8853	21.1055	22.2552	26.2803	20.5636	20.5637	20.4805	21.0544	25.8261	26.0811	20.8403	22.2736	25.5791	20.0962	25.7283	26.1734	25.5969	24.4627	25.1834	25.8157	26.8837
MOC2B	26.5111	26.2627	24.5789	24.9576	25.6616	25.9909	25.1505	25.0478	24.4902	23.9319	25.43	26.2004	27.0357	26.7501	27.1789	24.9773	22.3273	21.8002	20.8045	19.0104	22.0705	20.7166	21.2486	22.042	26.1681	24.2848	25.8819	20.5813	25.6653	26.5866	25.1096	25.0206	25.2209	25.469	24.5117	23.951	26.8051	26.7738	25.8225	25.1606	25.5302	25.8104	25.394	25.796	25.8816	25.7219	25.7314	25.3458	25.5408
TOM40	27.9686	28.2162	28.4781	28.2118	27.9798	27.2975	27.5758	28.4411	27.1596	26.5474	28.5375	28.1229	28.5358	27.8121	28.0956	28.185	25.0228	25.4554	22.2162	18.8367	21.2768	20.5488	24.9554	23.6187	27.4029	27.4726	26.7993	25.6242	27.8953	28.0471	24.4553	22.8172	25.959	23.2686	27.0569	25.9356	27.5327	27.2379	27.3602	24.7317	26.5143	27.2017	26.2379	27.0877	27.3894	27.0984	27.303	27.5448	27.1527
ACL6A	25.5603	25.6175	24.6363	24.8338	24.7534	25.1136	23.6646	25.9139	25.1451	26.2779	24.2318	25.3786	23.7144	24.8232	25.7461	24.1451	25.1594	24.4699	23.263	24.809	20.7084	23.4125	24.9636	25.214	19.8429	27.4422	23.865	25.0625	22.0232	25.0976	24.7132	24.5492	22.2854	26.8554	24.92	23.4624	25.9587	26.3935	19.9003	24.6247	26.0179	26.5208	26.9858	26.7235	26.8735	25.1966	27.122	26.6559	26.8007
AL1A1	27.8715	27.1533	25.2225	22.3337	26.3968	22.7435	29.2508	24.9427	26.1762	26.8753	31.133	28.6257	31.687	27.6502	31.3375	27.4822	29.5015	28.5237	30.8252	29.7706	26.2626	27.0032	28.8374	29.1524	30.8617	27.0408	32.3734	31.4508	30.4918	25.8568	28.4558	32.1885	33.3905	28.3953	32.0859	31.4894	32.5067	27.9033	31.7927	29.0253	34.3407	34.2519	33.884	33.8592	33.5097	33.5694	32.5168	32.1221	32.2032
NB5R3	31.2502	31.1	32.4517	31.7774	32.2396	32.2204	31.9183	31.1925	30.624	29.7135	29.0575	28.9486	30.6532	30.6804	30.8928	31.038	28.9308	29.5689	28.1002	27.6087	26.9419	26.4497	28.287	28.6424	31.682	31.8632	31.4748	31.5323	31.0918	30.164	31.0497	31.2886	30.5765	30.4734	30.5067	30.0879	31.5407	31.0054	30.8424	30.412	31.4222	31.4674	31.3201	31.3335	31.0104	31.2055	31.2633	31.4941	31.8501
COX2	27.8635	27.6155	29.9932	29.489	29.0582	29.3404	29.2249	27.3957	26.4039	29.5053	28.5547	29.6599	29.2549	29.439	29.913	29.736	27.3298	27.5112	23.7564	27.1497	25.6448	26.3157	25.4723	26.6948	30.2518	27.2178	29.7128	30.6071	29.31	30.1304	28.9358	30.0359	29.5615	28.2404	29.0959	27.9387	29.4207	29.3519	29.3368	29.1847	30.0515	29.7196	29.3519	29.5567	29.405	29.656	30.2957	30.2484	30.12
CERU	22.5545	21.6564	23.238	22.0637	21.2189	21.3407	22.9293	20.8035	24.8191	21.374	21.2791	27.4639	22.0433	21.0596	21.5915	23.1217	26.2403	26.985	31.2993	30.4796	22.8502	21.6189	30.5535	31.7274	20.2946	20.9546	30.4093	28.1597	23.5633	24.0166	24.3619	25.5216	28.0178	26.9439	24.9426	24.9995	23.3724	19.1226	20.5584	17.1466	32.0234	32.3008	25.2955	25.0096	30.1438	30.2866	32.1822	32.1939	31.3963
F13A	26.0723	24.6534	18.3614	19.105	20.9098	21.1841	18.539	19.3417	20.4524	20.6764	18.6398	20.4824	18.6297	23.6648	21.2037	22.1827	23.3736	21.5261	25.276	26.7695	20.2579	21.0386	26.7131	24.9851	21.7892	20.681	27.775	25.8516	24.5276	22.9818	24.9606	27.0731	27.1853	25.6388	23.7723	23.7977	27.294	25.2896	26.1366	25.4934	31.3412	31.5789	31.0782	31.1475	31.4039	31.8021	31.6746	31.4073	29.7572
PNPH	28.0762	27.4375	28.6115	27.1818	30.196	28.4145	28.3516	27.9591	26.8001	27.8877	29.7316	28.8363	29.6162	29.288	28.9315	27.4491	24.9482	23.6676	24.6616	23.4461	23.1935	24.9756	23.7388	19.8913	28.4075	27.9685	28.2098	27.2369	29.7309	27.9866	25.8399	25.0712	24.8059	24.9556	24.2643	24.2683	29.0059	28.1431	28.2207	28.7728	27.9537	27.8138	28.1429	28.3746	27.8628	28.6716	29.6611	29.1585	28.1655
HPRT	28.9038	29.0176	28.82	28.8738	28.7225	27.7946	28.5596	28.1186	27.9449	26.8775	28.3274	27.3821	28.7354	28.4344	28.6584	27.4692	28.0556	27.7874	27.7919	28.3417	26.6483	26.2608	27.5634	27.2359	28.7478	29.0207	29.0088	29.2098	29.4038	28.9249	28.9931	29.0593	29.6519	28.1229	29.9457	29.0534	28.4396	27.0357	28.5403	28.5564	30.0661	30.5094	29.1432	29.6763	29.561	29.7208	29.7728	29.796	30.8657
ABL1	24.9861	25.5647	24.4418	24.6678	24.6116	24.6774	23.8227	25.875	25.1625	21.338	23.5671	25.042	24.7594	24.5612	18.26	25.2212	21.6371	21.3535	21.174	19.1196	20.8075	21.4979	20.5748	21.575	23.0381	23.267	23.8963	21.1859	20.8677	22.5756	21.6002	24.6239	25.0945	20.8129	20.7503	22.032	24.4922	24.42	21.9296	25.0905	24.5584	25.0087	25.5578	25.5102	23.9223	24.0415	24.4278	21.9059	24.8344
FA9	25.3265	23.8101	21.7047	22.0055	23.604	18.4979	21.0852	22.0065	19.9753	26.3442	22.2113	22.0816	22.5611	21.1856	20.8991	22.0663	23.5838	20.2628	24.9871	22.7988	19.3949	23.6674	25.4366	20.3634	19.9554	22.2746	20.016	21.1936	22.7475	22.5993	21.9629	20.2817	23.1101	21.6578	23.4534	23.9801	20.0731	21.6343	23.7663	20.922	27.8876	27.7945	28.8008	28.6341	28.1951	27.1868	26.0726	26.3863	28.3381
FA10	25.5901	25.5887	22.386	26.0284	20.5543	22.7777	24.9721	25.4248	25.5833	22.0585	23.0597	24.8617	25.2953	24.725	24.4343	26.0809	27.603	27.7968	20.0369	20.8032	26.6632	21.1665	19.748	19.548	26.2783	28.525	20.9001	21.3823	28.3363	28.1086	22.3127	21.1459	20.8095	22.623	19.6073	20.1676	20.2469	25.9965	23.1177	21.8272	24.5046	21.0538	20.2389	20.9943	22.5367	24.666	26.017	25.9592	20.9755
CFAD	22.2298	21.1063	21.3801	21.9295	20.5976	20.2575	20.691	21.2254	20.5534	21.9711	21.1011	21.2765	20.2153	21.2966	20.701	20.6576	20.4111	20.1115	18.5445	21.278	22.9728	21.1857	22.9292	19.8989	22.0918	20.6302	25.9844	25.0055	20.1565	21.3421	21.0053	21.5435	21.2212	21.1413	23.2319	21.6756	20.5285	20.4383	20.1358	21.9772	25.7479	25.7063	22.347	20.4615	21.815	25.9983	25.3688	26.4179	25.6294
PLMN	19.6909	24.2804	19.932	20.7149	20.0418	19.9752	20.558	20.9489	21.6012	20.2368	23.0483	22.4206	20.0031	24.8009	20.3807	22.708	24.1092	20.8885	26.3976	27.0403	18.4181	23.0661	23.8177	23.1608	23.0844	22.0066	29.7596	27.6566	18.7966	23.5532	23.1087	23.5548	26.2777	25.6331	25.3069	24.7895	20.4962	25.1718	21.0983	24.4917	31.4688	31.2861	22.8986	22.777	30.7697	30.6762	31.2741	31.3322	29.7062
FA12	20.6127	21.3391	19.7669	23.2502	24.3711	19.5363	21.2138	21.9173	23.8082	24.1914	25.7833	25.5206	20.1034	20.3712	20.3995	25.108	20.7242	20.9396	20.5343	25.3765	24.5483	24.3917	27.8033	25.9228	20.5099	21.2032	26.4702	25.7417	21.2449	20.8088	20.8446	22.3137	25.4606	25.1264	22.154	20.0223	22.4596	23.5775	21.5265	20.3266	26.0625	26.6779	25.3995	21.3631	26.3747	25.7848	25.9937	24.8258	24.6278
TPA	25.7017	21.683	21.3862	21.546	20.2569	22.6999	20.2494	20.5198	25.3634	21.2438	21.5093	25.4521	21.2436	24.7908	23.2352	23.6494	21.7749	19.7663	22.8156	24.7908	21.4939	19.8256	20.4979	23.5464	20.6306	21.5396	20.9598	23.7469	19.2463	22.1652	21.6318	21.6787	20.6548	22.6572	19.918	22.33	23.0676	20.8317	22.1993	22.9902	24.765	25.5455	26.9675	25.9292	24.8773	25.1133	24.434	22.2263	19.9595
CFAB	23.2267	22.9684	18.6878	19.5817	21.6105	24.539	21.6783	21.1729	24.6195	19.857	21.044	24.5277	21.8986	21.6216	18.7196	21.783	26.1444	26.1648	28.447	30.5207	20.4658	20.136	28.1269	28.3141	20.8197	19.757	29.2337	25.9338	17.582	23.0895	21.6474	21.3218	25.0446	25.3431	25.0804	24.9482	22.1295	19.8333	19.565	23.3526	31.4268	30.5214	20.6563	22.7455	29.8695	29.5467	30.1803	29.4247	30.8593
ADA	21.9399	22.8294	24.4625	24.8234	25.5097	24.6033	25.4951	25.1831	24.0746	21.156	19.8665	22.4826	22.2868	20.4184	21.356	22.4612	20.9117	20.1197	20.4587	21.9639	22.1609	20.5961	24.4502	20.5385	20.3585	20.3343	21.0045	20.6314	19.7963	21.1393	23.027	22.3146	20.4805	21.8406	20.9024	21.0399	23.0613	20.4698	21.0127	21.6435	24.9044	25.5244	27.4724	26.3501	24.7669	24.2664	25.4423	25.8846	23.8598
CAH1	21.7231	20.8709	18.7227	19.6655	20.3754	18.9051	22.2395	20.0158	21.0513	20.1126	21.6637	20.3828	20.7472	21.0164	20.2183	18.5106	24.1784	25.8862	22.6725	23.5212	21.7668	21.8988	20.6048	22.1115	19.4712	21.9073	27.2172	28.1844	22.7013	21.7964	23.462	23.4532	19.2449	20.6216	21.376	21.1712	19.6014	20.4964	21.9872	22.2254	24.6853	24.5424	26.3582	26.6656	25.5328	25.3271	28.7432	28.459	22.0589
OAS1	21.3438	20.9284	20.325	20.8309	20.6503	20.8816	19.4298	20.3979	20.6589	23.8341	19.4218	21.6582	22.144	21.7534	21.5278	22.1302	22.1976	21.1732	20.5638	20.9354	21.1607	20.1067	21.1929	21.7704	22.6994	21.4097	21.112	22.1512	19.8935	20.4754	21.6126	19.5949	22.2016	21.2343	22.027	21.2311	21.073	21.5157	20.9701	22.0302	23.1659	22.6	21.0146	22.3328	23.2123	23.2067	22.7379	22.8891	20.1709
ANT3	19.11	21.27	24.1019	19.4541	19.855	21.2885	17.9105	21.2172	24.1113	18.1755	18.3968	27.1324	26.5581	26.8198	26.1945	21.473	20.4798	19.2137	27.5761	30.1007	21.18	25.1411	28.1895	26.6116	24.5422	19.8613	29.6584	26.614	20.259	22.5191	24.2747	25.6224	28.955	26.283	25.8829	25.3029	25.3202	23.8522	24.8585	22.9068	31.5229	31.5919	28.0607	28.1217	31.2781	31.5811	31.5791	31.3282	31.1708
A1AT	19.5997	20.6725	16.8241	16.8444	19.8427	21.1322	16.2205	21.785	22.8787	21.6156	19.1853	22.737	19.2056	19.5146	20.8387	19.6201	28.4274	29.0474	34.1795	34.9847	26.5482	26.1843	32.5224	33.6021	26.736	24.598	33.8591	29.7388	29.8147	27.3395	29.4561	29.1868	32.3367	28.6452	31.3783	27.4853	30.2034	25.8825	30.9546	29.4284	34.8433	34.8012	28.256	27.7888	33.833	33.8051	34.2313	34.0349	34.3269
AACT	22.2327	19.9755	20.0221	20.602	21.8876	22.0274	21.9432	21.2695	19.8881	21.548	20.549	22.5445	18.8871	20.3282	21.2087	21.9672	25.3763	25.9669	32.6311	32.4873	23.0658	23.3374	31.1804	31.4912	22.6691	21.2751	31.471	29.9843	23.9687	23.2805	25.683	26.2893	28.6186	26.7614	29.1142	26.281	26.68	24.7466	26.4083	25.0592	32.2508	32.1737	26.4434	26.9475	30.1972	30.0317	31.8106	31.7836	31.4833
A2MG	22.7582	24.9016	26.5415	23.0701	25.5864	22.9677	24.139	24.1691	22.621	22.9392	21.3707	25.3862	24.2588	22.2234	23.8661	23.7578	28.05	27.8197	33.204	33.7575	25.4779	23.7432	32.7567	32.4277	24.5364	23.5122	32.934	29.8584	27.2955	24.7321	29.375	32.6412	31.7326	30.3247	30.4828	27.1389	25.1955	24.1238	24.9758	23.5071	32.9713	33.0168	28.8463	28.9949	33.7094	33.6857	34.0153	33.916	32.5154
CO3	21.9481	18.9735	19.0664	19.606	20.5114	20.3499	24.9732	18.8889	19.7166	21.4735	17.5175	25.5072	19.2595	20.4784	19.3149	25.4431	30.1389	30.14	33.9313	34.1382	24.1079	22.1306	33.2997	32.8309	21.767	20.0458	33.5046	30.581	26.4085	20.5971	25.5222	30.6113	32.9922	27.9538	32.5195	28.2755	26.4016	24.6724	26.3841	25.1225	33.8631	34.0529	30.2293	30.1598	33.0583	32.7083	33.4673	33.3406	33.2548
CO5	20.8847	23.3844	22.0864	23.7493	20.4036	19.7577	23.0152	23.1038	24.0992	24.0378	28.2878	24.4903	22.2126	24.1336	23.2706	24.1131	20.4749	24.0352	27.5863	27.9683	19.8124	23.1936	24.9684	26.0881	20.8438	20.9475	27.0134	23.9682	21.0993	21.7467	23.2057	21.2209	27.308	25.9371	24.7961	24.7902	23.4359	20.5158	22.8702	24.2317	28.1696	28.9463	20.5688	20.035	26.6469	26.6919	27.9367	27.8628	27.9538
TIMP1	28.6541	28.7051	30.0561	30.054	31.0354	30.2193	29.3309	30.1653	27.2575	27.528	27.2507	27.1598	27.5808	27.3877	27.9392	27.185	26.8448	28.363	21.1417	21.254	29.3436	29.0616	27.497	21.7484	28.8089	27.8995	29.7448	28.2874	30.1724	28.8427	27.0656	27.0655	21.2833	21.8335	20.3006	23.5586	28.5843	28.6342	28.7067	28.3973	21.3905	21.4242	21.2974	20.561	20.0972	21.8303	21.2619	21.5506	20.9305
CYTC	26.1982	26.6964	26.672	27.149	24.9821	26.8754	26.4927	27.0872	24.9704	26.1627	26.8422	26.1278	26.0925	26.0823	26.4688	24.7966	25.7105	27.4613	28.2058	25.7562	26.3734	26.6873	26.9488	27.8989	23.0398	25.2666	27.9367	28.1142	24.5069	20.4123	24.7494	20.5322	26.642	26.6615	21.8607	23.1396	25.7741	25.961	27.3429	22.8427	28.1833	29.0391	27.1021	27.0772	26.3652	26.8783	26.6136	26.5554	28.2144
CYTA	19.6215	21.8782	23.0583	20.1536	20.9489	21.8896	23.4335	23.7387	20.8809	24.4739	23.0687	24.2312	23.3943	24.0318	25.6258	22.1085	19.5666	19.4038	21.0425	25.5435	23.5304	20.5578	21.0919	24.7322	20.4179	22.4941	24.7301	22.1425	26.8838	26.8252	21.1847	23.3496	22.6788	21.2702	23.7278	23.5677	21.69	20.9867	21.5416	21.6202	20.7886	20.9982	20.6924	21.6252	21.2425	20.735	21.6922	21.0813	23.1072
KNG1	19.4598	25.4487	19.717	21.1104	19.5996	20.4433	21.4739	21.3069	21.8059	19.8467	20.8483	21.6284	20.3286	20.7355	21.1005	21.1996	21.0544	20.9322	30.0241	30.1639	20.1246	21.664	27.1764	26.9423	20.03	22.4609	30.2692	27.5007	21.1961	21.1826	24.4695	21.7104	27.7356	25.7135	27.0114	24.2639	21.0514	21.9658	21.6104	21.922	30.348	31.0032	23.1899	23.6619	28.8955	28.9847	29.8317	29.9743	29.628
RASH	24.3237	20.4399	22.8105	23.9295	25.1049	23.3453	21.4071	24.3609	23.2245	25.2568	23.9544	24.4197	24.3486	22.7097	24.9461	20.8627	19.8538	21.3454	19.9954	20.9553	20.5872	19.7788	20.0265	21.7363	24.0947	23.1422	21.3725	21.7387	22.3151	21.4099	23.3038	24.95	25.4111	22.8005	22.0669	25.186	24.9969	24.8363	20.8399	20.9745	24.4824	24.7712	24.973	22.2126	25.7577	20.8201	23.3977	25.9033	24.4356
NPY	20.2606	19.6981	21.3314	21.0936	18.627	21.5114	20.3812	21.8068	23.0816	20.9919	20.685	20.7551	21.0546	21.3709	20.4175	21.3078	19.3202	19.3905	21.2326	18.6728	20.5487	22.2276	18.7593	20.7287	20.987	21.0057	20.7506	22.076	20.6464	21.2765	20.3963	20.3747	22.4757	21.8914	19.6951	20.8291	20.5161	21.9387	20.9833	17.4922	26.7691	26.1116	24.5976	24.5477	20.1686	21.1651	30.259	31.0191	22.9063
KV102	20.6436	20.8822	20.9912	21.6743	21.5008	21.2053	22.3467	18.477	22.7617	21.5732	20.325	20.5888	20.273	21.7758	20.5612	19.751	20.2467	21.0693	23.6534	24.0261	18.7779	21.9018	23.2598	22.9343	20.0817	24.1097	22.6664	18.8214	19.8424	22.3907	21.9862	19.5081	19.7838	22.128	21.1072	21.3625	21.977	21.1003	22.7645	20.1823	24.3131	24.95	20.9244	21.1297	21.1224	21.0001	25.2362	25.3052	25.6293
KV117	20.6607	20.8069	20.91	22.6546	20.5738	20.6484	21.5571	20.2286	20.4354	23.1285	19.7315	23.75	20.2102	21.928	21.3512	20.9575	21.3453	20.5696	20.6987	24.9735	19.6372	20.6651	20.7421	19.6003	20.9279	20.7556	26.0364	26.3353	20.9658	20.2716	22.0545	21.7857	22.3952	19.8094	22.2339	21.3116	20.7546	20.8914	21.0275	21.079	25.0587	25.0988	21.434	20.3422	24.9582	23.7033	26.3336	24.2623	25.391
KV121	22.3627	20.1927	20.0622	20.2168	21.4232	20.2079	20.6394	22.5984	22.1278	20.5593	21.3518	21.3479	22.8731	20.8348	23.7936	22.2297	20.1044	21.4703	26.2006	27.2247	21.8789	23.0495	19.2966	23.5047	21.2258	20.3903	26.8764	27.1758	21.7149	20.8613	22.0273	21.9444	25.6234	23.8753	23.5871	23.3522	24.3198	24.3888	21.9779	21.2364	26.9349	26.8588	23.9638	24.4961	26.4076	26.3417	28.4892	28.7096	27.0881
KV201	19.8008	20.5685	19.2789	20.9888	20.4474	20.1763	19.9132	20.5919	21.2231	21.3411	20.8075	20.938	20.7722	22.1473	21.571	21.5651	21.1517	20.7795	19.278	21.6926	21.8673	20.9067	19.1271	20.4727	20.985	22.3193	19.4928	20.5815	20.3659	21.5455	20.2559	22.2297	20.0965	22.3311	21.9305	21.4647	19.8019	23.1614	21.0273	21.8102	21.0195	20.6185	22.2183	22.1314	22.5506	20.8161	23.9084	23.8298	23.1793
KV303	22.6006	20.5479	17.7437	20.6386	22.0261	20.6099	22.043	20.8499	21.0954	22.9041	20.1229	21.6948	19.4058	21.3399	19.8782	21.2632	27.5746	27.3663	28.827	30.8409	23.054	19.8288	30.4079	20.9831	21.38	20.9999	29.3448	28.6834	23.1309	23.5778	27.198	27.3791	27.5301	26.8176	27.0905	26.1382	22.7362	23.1421	23.4438	22.7455	20.8863	21.6875	21.7536	21.1051	21.0428	22.3576	21.31	21.1148	21.8527
KV306	21.0899	21.4913	21.1108	21.9013	20.9061	21.1686	19.7784	21.255	26.8284	21.2001	21.2286	21.3328	21.0742	21.0714	21.6781	24.9623	19.3928	19.0939	29.1763	19.8397	20.8995	20.6621	20.7216	28.9737	21.883	21.1707	28.247	26.0512	20.2998	20.1244	21.1385	20.6592	26.3587	21.2689	20.5448	20.6711	20.2552	20.6055	20.5183	21.4295	25.7523	25.695	21.5688	21.3833	25.4309	25.7601	27.2537	27.3275	29.9754
HV102	21.6681	21.5823	21.0464	21.4648	21.809	20.7397	18.3239	20.4136	21.4369	21.5317	21.5883	21.5927	19.8891	21.4922	20.2702	21.3288	20.5829	20.5331	24.6966	24.6905	21.3781	19.7596	23.5703	23.3688	19.7169	20.8079	27.3735	25.0256	20.6398	20.6042	22.3184	20.8817	24.4594	24.1843	24.4373	22.1854	20.4337	21.688	21.0553	21.1469	26.759	25.4501	20.2297	21.0165	25.7108	24.3035	27.1599	25.5066	27.8298
HV303	20.5089	21.1526	18.6488	21.5915	20.8417	21.88	21.3362	20.1954	20.8357	20.948	22.3709	21.3198	21.5214	21.9663	19.7343	22.6085	20.6721	21.257	27.2321	27.1851	19.9215	19.3328	26.5288	26.7509	20.5568	20.4577	20.5124	21.4586	20.8313	20.5436	21.6002	20.8152	22.0517	21.3792	20.2454	20.0571	21.734	22.6929	22.026	20.6785	25.8444	19.8894	23.0933	20.8848	22.3707	25.2144	27.4086	27.1946	26.7451
HV305	21.9229	21.25	20.2366	22.9608	21.3772	22.0319	20.6734	21.4768	21.4335	23.748	21.12	20.6004	20.5666	22.7178	21.253	23.8861	26.0167	28.007	31.2842	30.9292	20.647	23.0462	30.4042	30.2943	21.4033	21.2426	30.8005	29.2481	24.0242	23.168	23.5104	29.8304	29.0677	28.8108	28.1112	27.1939	23.2427	20.5404	23.5924	22.723	30.4668	30.4975	27.7125	26.791	29.4864	29.5715	31.0726	31.0409	30.4713
HV306	21.505	21.1387	19.9122	21.4992	20.5181	21.0922	17.6545	21.5444	23.7106	21.5285	19.5905	20.4791	20.7882	20.7501	19.6806	20.1852	21.3627	22.1651	24.4246	24.3601	19.7462	20.9808	23.3557	23.3469	20.6425	21.6289	23.8683	21.8373	20.3644	20.9898	21.4703	21.9683	22.2592	22.6668	18.7488	22.1344	21.5304	21.13	21.5262	21.4602	25.0356	25.2836	21.0613	21.5177	24.105	23.7493	26.3461	26.5763	24.6555
IGHG1	20.3654	20.6436	20.5341	16.4262	17.579	20.8256	19.9929	18.1633	23.0506	23.1921	22.5512	22.4884	20.2044	20.7289	19.7051	20.6349	31.981	31.6284	35.3731	35.1737	25.8716	28.6283	32.1206	34.1401	28.6326	25.0264	34.9343	34.2464	29.0536	28.3865	31.0203	33.2957	33.3663	29.0787	31.6885	28.0932	29.0304	27.9791	29.0307	26.5365	34.0771	34.2125	30.2651	30.5211	33.777	33.7813	36.0309	35.9098	34.5095
IGHG4	20.8708	20.0646	21.1534	21.176	20.1653	21.112	22.3613	21.0204	21.9939	24.0723	22.4769	21.0813	21.0203	22.7421	20.9577	21.4154	21.0484	21.7181	22.9172	23.7117	21.4539	21.4581	18.9107	20.4658	23.4669	24.4299	22.9037	23.7491	21.4693	20.8553	21.8556	20.1981	23.7348	24.4751	20.4853	20.2399	20.5646	21.2099	19.9794	22.7432	24.9716	25.862	21.0891	21.832	27.5263	27.4567	27.5461	27.4114	22.7246
IGHD	21.005	19.8236	20.2872	21.3488	19.9177	21.8776	20.5541	20.1478	21.5562	22.2652	22.227	21.1716	19.9764	21.6845	21.8756	20.5896	24.1636	26.4372	23.8608	20.3061	23.0039	21.7482	28.1383	19.5279	19.9469	20.5044	21.3969	20.8375	20.4245	20.6028	21.7238	22.0091	27.4896	27.6063	22.4296	23.7385	22.0296	20.1454	22.0629	22.0659	25.2622	25.0142	21.0462	23.733	21.6687	24.111	26.5447	25.7995	24.518
1B07	27.254	27.1446	29.5055	28.3643	27.3967	26.8283	29.0299	28.3244	26.0679	29.8009	30.3549	27.1661	29.2615	29.0593	30.0381	28.2416	29.241	29.0285	28.6968	28.5918	29.3988	29.6525	28.9133	29.0488	29.0429	29.0025	28.1558	26.9652	27.7398	28.3141	28.1271	27.7558	29.1725	28.5253	29.7577	29.0971	29.1576	28.5501	28.8038	27.6939	29.3913	29.5401	30.9858	30.852	29.6932	29.526	31.187	31.2462	29.2343
1A68	27.6026	27.5	27.3171	24.1477	26.9927	23.4091	26.036	21.2003	24.9898	23.1644	28.3492	27.9715	27.6744	28.3032	30.0578	24.3615	22.783	25.4552	26.3474	23.2706	25.6698	26.9865	23.7925	25.8018	26.0334	21.5441	27.0817	24.6155	27.341	22.7749	24.9219	26.9367	28.5382	25.8806	24.3596	25.4004	27.4814	24.6031	25.2756	23.2778	27.1097	27.0507	29.7751	29.5116	28.4038	28.7293	29.787	29.6527	29.7793
DRA	28.3048	28.113	25.7086	25.2968	25.7479	26.0747	26.4088	26.0459	30.7749	32.1908	32.3672	32.0639	32.7673	31.4539	33.6435	32.3608	28.6193	29.529	26.3332	27.552	28.6211	28.5972	27.6431	27.666	30.9076	30.1758	28.218	28.2224	30.2069	30.5614	27.6701	27.9277	29.7354	27.755	28.9076	29.2587	31.8811	31.0046	31.4442	31.1146	31.0766	31.3122	31.5612	31.5472	31.881	32.0609	31.4929	31.9812	29.7161
DQA2	20.909	20.5754	18.8323	21.1479	21.3715	20.3266	19.2237	21.0632	19.5198	26.3249	20.7739	21.6832	20.767	20.2911	21.2063	21.9558	20.204	20.1048	20.6786	19.5007	21.7456	20.9045	20.2695	19.0811	21.7355	21.2684	20.6019	20.6697	20.0319	21.0532	21.5372	21.0336	19.8721	21.4114	21.6869	22.2234	20.324	21.2867	22.0975	21.606	21.8444	21.2295	21.6535	22.2706	22.3715	19.6912	23.9286	24.2439	20.6404
DQA1	21.1254	21.6555	19.5412	20.7758	19.7421	21.5878	19.0412	20.5794	22.3201	22.6433	21.6955	21.2642	18.5377	22.1151	20.8591	21.1567	20.5517	22.0289	20.5121	19.8473	20.8973	20.8969	20.8211	20.8063	18.705	20.8399	18.9467	22.5666	20.9119	20.658	20.9926	19.5773	20.5907	22.2649	20.4493	20.5741	20.5521	21.713	20.461	20.5656	21.6893	21.3481	20.1674	23.0171	24.7988	23.5036	23.5093	23.4553	21.7623
2B1F	20.698	20.2203	23.2016	22.0619	23.4476	22.3186	24.3764	21.1356	29.2869	26.5904	32.0858	28.4961	31.5761	29.6921	31.4161	24.9709	28.0605	29.4296	24.968	25.2165	28.9176	30.0026	19.1175	26.6906	29.7338	28.2225	25.8179	24.4478	30.4707	28.2545	25.4893	25.7973	28.0577	27.7991	28.113	22.6834	29.8443	27.1683	29.7785	25.5398	28.8194	29.7323	30.9088	30.5396	30.6476	30.1975	32.3071	32.4651	26.907
2B13	20.4083	21.3707	22.0353	20.931	20.8229	21.1437	21.3877	23.552	22.0138	21.6476	21.972	21.5742	21.5469	23.3888	21.4218	22.4466	20.7542	21.0021	21.004	18.4851	20.8897	20.968	19.4032	20.0942	21.1491	21.3199	21.8026	21.4917	21.345	20.2981	22.1358	20.3093	21.2934	21.5974	21.7402	20.2747	22.9389	20.8452	21.507	21.8025	24.438	24.4478	25.1882	25.4586	23.6597	23.5819	25.7308	24.8643	21.0932
HBD	23.0419	22.0989	20.4154	21.2359	20.9576	20.0638	20.9714	21.5529	21.2933	22.0919	21.3023	20.3536	20.9389	21.9734	19.6187	20.5977	27.2049	27.1891	25.0131	22.0326	20.8442	21.3757	23.8517	21.6096	25.6329	25.5953	28.5737	26.158	24.3049	23.3611	25.7681	25.0805	22.9015	22.494	23.4618	24.9289	19.9946	23.6587	19.2414	22.2381	24.6976	26.1251	28.1639	27.9859	25.2207	26.4996	29.7654	28.6072	20.006
CO4A1	22.1058	21.1746	27.2266	23.5751	25.3887	25.1436	20.6346	23.4439	22.3345	24.5234	21.0799	22.3701	19.2514	20.3128	26.5992	22.6885	24.7743	19.2091	20.7763	24.9178	22.4697	20.4472	25.5582	20.7184	24.8707	21.6766	20.9244	24.1764	20.5749	22.5198	21.9553	22.1804	22.122	22.9983	19.4615	21.2973	20.1332	25.5147	20.8632	22.1317	21.8595	23.1779	26.0862	24.2199	20.7515	26.7085	26.4302	19.2799	23.4736
APOC2	28.268	28.3307	21.4487	20.0417	23.575	21.6671	20.0215	21.8438	27.2894	22.9191	20.0689	24.8188	21.5833	21.0677	21.0669	20.7026	21.6842	22.0271	19.102	28.1032	21.1764	21.3978	27.3785	25.8892	20.7104	21.4007	24.0176	24.7996	20.0842	21.7804	20.7456	21.8693	25.7177	21.4736	26.4516	25.5933	23.5841	21.0233	20.1638	21.5883	20.2987	20.3987	22.1573	23.1497	23.9492	21.8592	23.2291	22.9575	20.1039
MBP	20.7731	15.4637	18.8034	20.4063	16.8374	19.7141	17.1893	20.8712	22.0752	22.9991	27.5862	23.9974	25.555	22.2806	20.8634	19.8847	35.8011	35.7022	36.0479	36.1151	34.8906	34.7876	36.6419	36.3811	37.9072	34.4669	37.465	33.6734	37.7489	31.9813	32.1996	38.1473	37.6813	29.2696	38.4955	34.7729	36.6242	26.4801	36.9144	32.1028	18.802	22.9219	21.7619	21.3079	23.6619	23.9131	20.6166	18.4349	23.8186
MYP2	29.2452	29.6624	23.9194	20.0177	25.2445	25.2902	20.4668	19.8311	25.9643	27.3082	32.248	28.7968	29.7455	25.3863	28.8515	24.6919	37.686	35.2753	34.4158	37.1433	36.201	36.2347	37.648	37.6722	37.3372	34.8692	37.8014	30.6996	37.3615	35.7144	33.1139	37.4448	37.356	31.208	38.3199	37.4798	35.5651	29.0622	37.7416	36.625	24.4783	22.4816	20.5567	27.0049	27.257	27.1351	27.3435	26.8836	21.5373
B3AT	22.0879	21.1903	21.0105	20.3061	20.1497	22.3756	22.3412	22.1132	20.5691	20.6892	20.7835	22.6852	21.7522	22.2363	19.4516	23.3807	20.5154	21.7911	19.3828	21.6739	22.1143	21.0765	22.1796	20.7928	22.578	21.1391	23.2235	24.8293	20.9408	20.3461	19.5942	24.4305	21.2171	21.8292	22.078	20.2533	22.3993	21.6536	21.205	20.636	22.624	22.0659	25.7638	26.6613	23.7553	24.0256	24.5459	25.4571	20.1033
C1QB	23.2513	21.3291	21.0979	19.6678	20.621	20.7365	20.6657	24.321	24.3989	25.0174	19.9355	24.4391	20.5387	23.4077	22.043	22.7004	25.7306	21.7379	27.4543	27.7897	25.1349	24.0391	28.0058	28.6899	21.4391	22.8873	27.6104	26.949	21.0419	21.1841	26.3043	27.3747	27.5103	25.3837	27.6152	26.8169	21.3849	20.0899	20.8734	20.3524	28.9559	29.2104	27.3072	27.1126	27.9624	28.0679	26.997	26.8027	27.8346
A2GL	20.2107	20.6109	20.6349	22.7685	22.3529	21.9839	21.9664	22.9018	22.224	21.6015	20.9301	22.1729	21.1862	21.5161	20.5286	20.892	22.0023	20.2459	27.2654	26.4331	19.9249	20.7346	27.0783	26.9307	21.7848	21.0994	26.1204	24.5778	21.3985	21.3193	20.2089	19.767	20.5773	21.7253	21.6098	21.8363	17.9508	19.9842	21.1605	21.1969	27.4947	28.0706	20.2148	22.2321	25.3618	26.1472	26.8831	26.3079	27.5245
FINC	31.4882	31.4873	34.3616	34.3688	34.2649	34.1664	33.8274	33.3207	31.322	31.8976	31.005	31.2813	32.1719	32.4089	32.605	32.3165	33.9976	33.9485	33.921	34.006	33.1312	33.3038	34.0628	34.0433	32.6739	32.8985	34.9441	34.7808	34.7294	34.7136	33.908	34.4738	35.0991	35.3157	34.585	33.9321	33.4243	33.3284	33.4235	33.3123	31.4496	31.5375	32.4866	32.5736	32.7286	32.7704	32.0191	31.8798	31.6452
RET4	22.1729	27.0425	20.0992	20.9118	20.4802	21.2842	20.5942	25.2561	21.1379	21.4632	18.4962	25.3211	21.0993	20.0881	20.4037	21.4683	20.9816	20.8631	20.9979	20.417	19.5973	22.388	21.195	21.2196	25.1856	24.6911	24.6478	26.1953	21.9077	24.0911	21.3992	21.0942	20.7274	25.1835	24.4766	22.6063	20.4224	22.5511	19.6173	24.4731	25.6398	25.6647	21.2164	21.1784	24.8219	25.1426	25.9657	25.8059	25.368
TTHY	21.167	20.1546	20.9076	20.0655	21.6583	20.9619	21.0556	21.8415	22.1281	20.247	17.8338	21.594	21.8286	19.681	20.2344	22.1489	22.4399	23.0162	30.5468	29.024	22.3888	21.284	29.4006	29.3982	21.0319	20.9333	29.9505	25.4328	20.7959	22.0174	22.3195	25.8856	27.327	21.6757	27.7576	20.4952	25.394	22.313	21.4639	21.3104	32.0213	31.0376	24.2626	24.2888	28.4601	29.0581	29.9562	29.8064	30.2934
CXCL7	21.6559	22.604	23.6638	22.4176	21.7525	21.0002	21.1266	24.8342	25.0589	24.8473	19.7503	21.5806	20.1904	21.0426	21.3208	25.4437	24.4455	19.9773	26.0533	19.9134	26.2673	19.0809	25.9086	25.8286	20.2381	24.0176	23.2575	23.1522	21.6825	26.2413	22.3716	25.4031	24.959	25.1742	23.4956	24.0988	25.5519	21.2981	25.6361	20.9311	20.3283	24.8826	21.7768	22.5397	21.1772	21.5469	21.0111	21.0997	21.2251
TRFL	25.2104	24.1666	18.5379	20.409	19.6901	20.7896	20.122	26.3505	23.4668	24.8853	18.9648	24.275	21.2685	25.5025	25.5115	25.7547	25.897	25.3008	21.4535	22.8823	25.3848	24.8253	24.9066	24.7269	21.8448	21.6976	21.1313	21.7462	24.3419	26.2092	25.0613	20.5377	25.2783	26.4458	25.0579	23.0723	23.5678	24.5883	24.0872	24.5226	25.7195	26.2737	28.9103	27.8953	26.9722	27.2685	27.0609	26.5819	24.9863
HEMO	20.0767	19.1474	19.1735	19.296	20.4619	18.8602	21.3771	18.5008	19.3457	19.873	20.1482	19.3435	31.0456	28.2706	28.602	25.2379	20.4903	20.379	30.7426	31.6206	21.0064	20.6634	29.4755	28.8383	22.7155	20.2314	32.5571	26.0845	20.8328	22.6545	25.3371	24.8755	26.8519	24.9638	27.4403	23.8939	22.54	23.8245	24.5519	19.9399	32.5388	32.4719	26.3148	26.487	31.6637	32.0205	32.3411	31.6114	31.5302
FRIH	31.2623	31.447	30.6835	29.3586	31.0662	30.2047	30.0443	28.6824	31.3919	31.2853	31.3042	30.6636	31.8464	30.7076	33.0533	29.1022	31.6226	32.1737	31.6885	31.3573	32.1415	32.4583	32.7075	32.6953	32.917	32.5248	34.0596	34.2934	33.797	31.3869	32.7924	34.7801	33.9801	30.2224	31.8592	32.2452	33.2454	31.3538	33.2426	32.6738	32.5959	32.2131	32.1826	31.3941	31.4808	31.7224	31.694	32.1811	30.6867
C4BPA	23.4506	22.318	20.1743	22.2636	20.711	20.8968	20.566	22.8261	24.3909	22.2952	20.8153	23.1254	21.9113	22.2448	21.0419	23.0283	21.4276	22.0841	27.8162	28.8709	23.3452	22.9105	28.3086	28.5525	22.0165	20.9104	26.3106	26.4128	21.0523	23.3148	24.7147	24.8341	30.6926	28.2625	27.4475	27.3887	23.2654	22.5916	22.5309	22.5337	26.5203	27.127	27.6271	27.4459	29.0645	29.5591	30.6139	30.171	28.0535
VTNC	21.2943	24.7753	20.35	23.7774	20.3587	25.2485	19.2851	21.3884	20.7384	24.4142	22.5434	24.91	21.1433	21.385	24.5733	22.7312	24.7716	26.2649	28.0287	28.1974	25.9797	25.1831	27.1015	26.4071	24.1063	22.9183	29.8058	26.209	26.5114	26.8519	23.9971	28.1725	31.2327	28.4391	30.1179	26.3492	28.6184	25.9007	28.1852	28.3662	29.0294	29.7441	27.7605	27.5795	28.6275	28.5072	29.3619	29.4489	28.5807
ALDOA	34.6847	34.9249	33.9252	33.9332	33.9949	33.8047	33.5543	33.3173	33.8953	31.5214	33.1876	33.1257	33.451	32.3092	33.4521	32.8264	32.944	32.6674	32.3824	32.4375	33.922	34.2725	31.6085	32.5886	33.7841	33.9267	34.0549	34.6264	33.6241	32.3205	33.8285	33.9423	33.9824	34.0443	33.302	32.6121	33.9324	32.8681	33.4055	33.0888	34.2316	34.3003	34.0686	34.2131	34.0718	34.2157	34.401	34.325	33.758
CYTB	31.3222	31.1726	31.8699	30.3264	31.5306	31.4008	31.4369	29.4641	28.1022	27.6228	30.493	31.1481	30.8626	30.7012	31.4838	30.8187	30.2313	30.9666	29.8028	28.7982	30.0732	28.9928	29.9313	30.4775	26.0782	26.3647	31.3003	26.9387	31.1325	31.4683	31.7035	30.8999	29.4417	29.2677	30.8274	29.9126	30.9008	30.1593	30.7902	30.8507	27.308	27.8432	28.0017	27.8917	28.9046	28.8704	27.7672	27.5914	26.6323
ANXA1	35.0607	35.1207	34.6881	33.9996	34.83	34.3542	34.8668	33.2877	33.8196	32.0919	35.1248	33.4614	35.1509	34.249	35.5222	34.5918	33.3386	33.347	33.4986	33.6666	34.48	34.3526	33.7202	33.7159	33.5753	33.8465	33.6391	33.4448	33.0212	32.5474	32.4724	33.6132	34.5243	31.5405	33.7626	32.3661	34.1769	33.1755	33.95	33.5682	35.0252	34.8066	34.902	34.9461	34.9052	35.0192	34.428	34.5217	34.2644
APOB	27.7196	27.7633	25.4653	24.5104	27.1498	24.4554	26.4286	24.1131	24.5779	25.4236	25.3089	26.2443	22.5739	23.6584	24.6947	23.8645	24.7571	25.4304	28.1133	27.2287	24.7787	24.7893	27.638	27.1246	23.5951	22.6491	27.2171	25.423	22.4642	24.4454	24.5937	25.8475	30.2945	27.6877	29.8873	28.0977	21.4953	23.6261	23.5506	21.7841	27.3428	26.826	24.4003	23.8275	30.5978	30.7816	29.9728	30.3877	25.4708
OAT	29.841	30.0005	30.0811	29.7368	30.3322	29.5526	30.4559	28.8798	29.28	30.1998	30.1337	28.5831	30.3091	28.723	30.1664	28.7192	27.5299	27.7195	23.4505	22.6507	28.5844	28.5293	23.1278	20.771	30.4111	28.6829	28.3376	28.7491	30.0991	29.2764	28.0467	28.8361	28.0801	27.5984	26.9246	26.6108	29.3043	29.4843	29.9713	29.255	30.3304	30.4159	28.3386	28.2362	29.9389	29.9889	30.2301	30.5306	31.0216
HRG	20.3995	20.2732	17.8506	21.0717	21.8793	21.6669	18.6443	21.1346	18.3392	21.0938	19.3865	22.2722	17.9374	18.0216	21.3394	21.7725	22.8805	21.5702	28.148	28.9355	21.7732	21.9772	26.9196	26.2585	19.9848	20.893	29.016	27.4283	21.8152	20.0014	24.5548	24.4455	27.7544	25.3479	23.3628	21.1016	24.8753	23.8601	24.5364	24.2426	29.3334	29.9577	27.3746	27.4397	29.6497	30.0932	29.1603	28.5732	29.1817
A1BG	21.241	21.2123	21.1301	23.3593	23.0736	23.6849	20.325	19.8193	21.4329	21.035	19.2059	21.6071	20.4865	22.2853	21.4381	22.4658	23.7558	23.1273	28.2274	28.6183	23.3028	20.7394	27.3659	25.8488	22.1622	19.2613	29.8375	29.6447	20.912	21.6778	22.4302	22.1061	25.765	22.8159	26.1755	23.2998	20.4759	19.8226	22.2635	21.142	30.8419	30.8233	19.4507	22.0718	28.9578	28.4837	29.8063	29.644	29.9494
HG2A	25.6374	27.5104	21.49	20.8385	23.2978	24.2703	21.2792	23.4795	24.5746	25.6099	29.0798	30.1052	28.8625	29.285	31.4871	27.7581	28.0323	28.1727	23.9865	26.4141	23.6817	27.1425	26.7352	26.4838	29.5969	28.6029	23.3521	25.3704	28.8852	29.0848	21.3592	24.2973	27.7701	24.5489	28.0372	28.3815	29.8242	28.7395	29.45	29.1024	29.9449	29.8854	29.8586	29.585	29.9265	30.1123	30.1934	30.2114	28.4699
S100B	21.3683	29.4724	22.4949	23.4873	26.6768	25.5284	22.7674	21.7369	26.191	23.8869	31.1042	31.9586	30.3142	28.6047	33.6768	31.9964	19.5557	19.839	26.1895	20.1048	20.8915	20.8987	20.7301	20.5485	28.4753	28.4971	28.8767	23.6044	28.2075	22.6734	22.6188	29.1835	25.324	23.1247	20.7697	18.219	29.4812	30.2957	17.5647	24.5192	29.8889	30.044	28.435	28.6468	30.8155	29.9093	28.8089	28.7188	26.5094
VWF	22.2417	22.8828	22.6988	22.1169	21.4017	21.6528	23.6493	24.1029	23.4162	24.2313	19.9527	21.5588	20.6393	23.0902	22.7194	22.4405	25.7514	25.6307	21.669	24.4534	25.1236	24.6651	25.3219	26.7917	22.5624	20.8412	26.9406	25.8495	25.076	23.8531	25.6295	27.1816	25.9249	25.2945	25.7449	25.0621	23.6849	24.5962	23.5222	23.3927	26.2871	26.9365	31.5099	31.4616	30.2162	30.11	30.4156	30.0559	23.44
SHBG	21.5056	20.2764	20.9033	21.1075	18.2149	20.8096	19.6673	20.5609	20.9253	20.6453	19.7139	20.2967	22.1792	20.9206	20.4544	21.5209	20.8434	21.0719	20.521	21.2369	20.4877	20.4971	22.2465	22.2793	21.513	22.0734	22.8592	20.9766	19.9478	19.3966	21.8389	19.3378	23.3765	20.455	22.0809	21.8505	19.2789	21.6537	18.8267	20.5744	21.7448	21.5795	22.9759	20.499	23.2574	23.1202	22.5543	22.767	22.0573
ARLY	25.9451	26.1149	25.779	25.4067	27.8372	27.5571	25.8993	26.9451	24.6477	27.6604	31.3333	29.5152	29.9174	29.1077	27.9075	28.1884	25.9932	27.8204	25.9502	25.4514	26.572	24.6927	25.0776	26.0586	29.5962	29.1082	27.526	26.488	28.1253	28.394	25.0598	28.2191	27.4902	27.4067	27.4732	27.1442	28.5546	26.2961	27.6675	27.7313	27.7174	27.2053	27.7076	26.8879	27.6194	28.9288	29.6195	29.1883	30.1529
1A03	20.6088	21.6566	28.7174	26.5432	24.8322	25.0208	26.9537	24.8696	22.1089	21.5528	29.1455	26.8757	26.1539	25.7801	27.3827	27.413	20.5988	23.0707	20.0809	22.8518	21.8289	21.6444	21.9177	21.1236	26.7225	25.724	25.0465	23.1221	25.4183	21.1048	24.3262	24.457	27.3279	26.9416	25.4572	25.1448	26.2042	22.3613	25.979	24.0858	21.9376	22.3544	30.0215	30.3585	26.4489	27.2866	29.1013	29.2151	25.981
DPB1	23.6332	25.7625	20.8949	20.5119	22.0003	20.2079	20.5667	25.5179	24.3983	28.1721	27.3476	28.3606	28.8605	28.807	30.5724	30.032	27.3063	27.6006	24.5314	24.0245	26.5996	26.8199	26.2556	18.8174	26.0298	26.7016	24.8041	21.6028	26.743	25.9846	20.5228	25.5307	25.6848	26.159	25.5342	25.4105	28.8829	26.6922	27.9686	27.1932	26.5608	27.1002	28.321	26.8082	29.0545	28.8241	28.6146	28.678	26.3368
CPNS1	29.8004	29.9582	31.9352	30.9897	30.3988	30.5739	31.4054	31.7087	25.683	26.3874	32.3413	30.7818	30.9624	30.3075	31.517	30.7101	28.5541	28.782	27.5683	28.9158	29.5687	30.0893	29.1827	29.1578	28.9331	26.2648	29.2735	28.2792	30.3361	25.2378	23.2046	30.1879	30.2309	24.8243	30.0234	28.3229	29.2723	26.6927	30.3403	25.6904	29.9146	29.7118	29.6627	30.1111	30.9448	30.42	30.4057	30.2823	30.0142
AMY1	25.4049	25.5777	19.4043	21.9852	19.8913	20.6971	20.5055	21.9472	20.5239	21.431	21.19	20.7137	21.689	21.8128	20.9896	22.0035	20.5362	22.0053	18.7741	20.6646	21.6412	19.4503	21.8849	20.3004	20.456	20.5977	20.8003	22.3368	18.6905	20.7634	25.8804	22.0206	19.8029	21.2829	19.501	22.3475	20.9902	21.2536	22.3061	19.122	21.1272	21.8953	21.2726	23.2907	21.0648	24.9734	24.6737	24.45	23.2527
HSPB1	33.0036	33.0134	33.3013	32.8752	33.7239	33.465	33.8845	32.2249	33.0733	33.2808	31.8121	32.4268	32.1608	32.144	32.5764	32.6679	31.824	32.0056	32.3641	32.3327	29.3902	29.7171	32.2918	32.2418	31.4101	31.673	32.3479	32.9902	32.2668	32.129	32.6429	31.6659	32.5332	33.0213	31.8307	32.1936	31.8295	31.8476	31.6978	31.6769	33.4976	33.392	33.6384	33.5708	33.7754	33.9947	33.6446	33.6688	32.8872
CY24B	20.0036	22.1208	19.6424	18.3818	19.2539	19.3562	19.3781	21.3794	21.4586	21.4954	22.4422	18.7309	19.988	21.4889	20.592	21.7441	20.4656	21.0817	22.1774	20.7302	20.8992	22.5893	20.178	21.1649	22.9465	19.1464	22.5531	22.9848	21.5871	19.5461	23.9863	23.9465	22.5112	22.9573	19.7677	21.3616	20.7925	21.6571	20.1883	17.0804	26.0167	26.3068	26.9116	28.0601	27.9365	28.1604	28.4034	28.444	22.4605
RPN1	31.0695	31.1756	32.0286	31.2098	31.6092	30.8822	31.5202	30.5884	27.8919	30.8804	31.0708	30.2352	31.2536	30.5941	32.0414	30.2165	31.1512	30.1995	29.3286	28.7903	29.449	28.9267	27.914	29.3691	31.4924	31.6154	29.6694	30.4165	31.3192	30.7466	28.8914	30.2173	30.2503	27.6655	29.865	29.2521	31.5832	27.3904	31.1599	29.8611	30.936	30.8117	31.1707	31.1597	30.8713	30.9053	31.4179	31.303	31.235
RPN2	29.875	29.9881	31.4219	30.7474	30.8976	30.2521	30.7886	29.7264	29.2779	28.8964	30.8406	31.3781	30.3902	31.1806	31.8575	28.434	28.2708	29.5933	26.7203	28.1562	24.9358	24.9166	25.5366	27.2074	31.2427	29.9158	29.8784	25.5004	31.6197	30.296	29.0159	28.6799	29.8047	27.0378	27.1419	27.0036	30.6207	30.2057	30.4351	28.841	29.9365	29.9887	30.5996	30.6855	30.6362	30.6597	30.8451	31.1409	30.3632
H2A1C	20.6574	21.1425	20.6049	21.7658	20.7063	19.9014	20.3162	22.0797	21.3331	21.613	20.2484	22.6006	21.4819	22.9856	21.1466	22.1845	21.6707	21.0162	19.6219	20.6289	22.5913	20.9079	23.076	20.8499	22.284	20.7564	24.5411	21.323	21.8434	21.8805	20.0123	25.2679	31.5562	28.4966	21.0538	21.4388	24.6576	21.3099	22.2513	22.3236	29.9014	30.1184	31.0868	31.1805	30.017	29.9103	31.0999	30.9629	30.375
B3A2	27.0067	24.5242	26.5698	27.1822	27.6868	26.8563	26.3834	27.5257	25.8642	26.1627	27.3319	24.4232	27.3036	27.6289	25.3904	27.7653	24.7341	26.1765	21.8542	23.8303	25.2207	25.4975	20.9135	24.4551	27.021	25.1938	26.3773	27.3875	24.0156	19.0686	20.8165	21.5405	19.6371	22.563	26.0697	20.1248	26.6353	25.4791	26.8321	25.6989	26.4738	26.558	25.7644	26.4637	25.9085	26.1691	25.6763	26.3326	25.9392
AT1A1	30.1672	30.3444	32.6469	31.9676	31.7525	30.9651	32.2565	31.7457	29.5953	30.0135	32.9008	32.3491	32.7547	32.4659	32.6505	32.2218	31.8967	32.1203	32.0408	32.2752	31.7906	31.7117	32.5266	32.4632	33.0277	33.004	33.3239	33.5577	32.8465	33.2456	33.2245	33.379	33.1717	33.0495	33.4566	33.1781	33.1767	32.6954	33.2753	32.8152	34.9347	34.8815	34.3191	33.9667	33.8312	33.8207	33.973	34.0096	34.001
AT1B1	22.865	22.4811	27.4453	27.0699	26.3989	26.5164	25.4199	25.6805	26.1897	26.5368	27.9016	26.7465	27.7416	26.6284	27.4685	26.1046	26.5364	23.8309	28.4163	29.2703	20.4702	26.5687	29.5621	30.2952	29.7493	28.3903	30.7623	28.5208	29.0441	29.1731	26.8859	30.3803	30.0016	25.8437	31.0885	27.078	30.1473	26.0361	30.1251	28.9096	32.4934	32.6356	31.1145	30.9069	31.2854	31.2917	31.8975	31.7506	31.2312
APOD	24.9297	25.9006	22.5259	22.7556	25.2489	24.234	23.6197	25.1837	28.5056	26.7844	30.2266	28.4371	30.3333	28.5888	26.2117	25.4586	30.5788	30.4492	35.1609	35.6539	31.1591	30.9375	34.8233	35.0079	29.9773	30.0793	35.8613	33.1716	33.3985	32.1873	30.8662	35.218	34.5411	30.0813	34.1542	32.4559	33.4391	32.1345	34.0656	33.0847	31.4978	31.1383	29.2497	28.2992	33.2706	33.0523	32.9761	32.2986	30.0916
ALDH2	28.9795	27.8686	29.0609	28.5512	28.366	27.8124	28.699	28.0043	29.1042	29.5329	29.7478	29.464	28.772	28.1624	28.5852	27.7705	28.2311	28.5041	28.1408	28.5264	26.8486	26.9243	28.1971	28.7583	28.2674	28.1269	29.4418	28.6862	28.5599	28.407	28.7743	29.4542	29.2254	28.7469	29.3634	28.8025	29.2855	29.1655	29.1371	29.2173	31.3074	31.0035	30.8959	30.9768	31.1068	31.0581	32.0583	32.1677	31.2541
ITB2	24.5241	23.4187	21.5538	20.777	22.1146	20.1805	19.6259	20.9298	18.8179	19.5114	19.8357	22.5634	21.9599	21.397	20.4192	22.2787	23.4424	25.1157	22.6671	22.345	24.0132	21.3816	22.9336	23.5328	20.0935	21.73	22.4329	23.0356	22.1304	21.731	22.7612	25.1531	25.0782	24.3343	23.7266	23.896	23.0738	22.2173	20.5234	22.1268	27.7135	28.3783	29.0192	28.0332	29.0188	28.2384	28.8926	28.7053	25.5277
PAI2	20.4191	20.1229	28.4655	24.5746	23.0317	23.8401	25.2692	23.5346	21.7715	21.1158	21.0171	20.8847	18.478	22.5602	20.7276	22.6208	21.9855	18.9308	22.8526	22.2814	19.4094	21.3254	21.1587	18.5587	20.8636	23.7242	17.4149	20.7858	20.411	22.9495	21.739	20.5952	21.2791	21.8906	21.9571	23.6727	21.6952	21.3157	22.2675	22.2107	29.0476	28.6289	25.1072	25.0276	26.2229	24.6994	20.8689	19.2316	24.5994
IPSP	22.0827	22.2409	18.9195	22.8279	22.5335	20.897	21.9228	21.7007	21.5206	22.3674	22.8648	22.8738	22.0765	21.975	21.4599	22.2128	19.7985	19.451	20.6274	20.1918	21.3205	20.5411	19.9318	20.5535	22.6621	22.0421	23.147	21.5877	20.5215	20.471	23.2225	20.2757	24.0136	21.5186	23.4133	22.576	21.1444	21.1668	21.2229	20.3652	26.4252	25.9525	21.6235	21.3036	24.9947	24.817	25.4867	25.6132	24.4264
CFAI	24.3514	22.6976	19.7118	20.4987	20.6271	20.2064	22.594	20.968	23.2147	27.03	22.6085	24.0665	23.6984	24.1231	21.0986	24.9209	23.3347	23.0004	25.7976	23.1723	25.2446	24.7311	25.8689	25.0142	21.4167	21.1748	25.9785	24.5858	22.1946	20.4419	24.3303	21.2626	23.4478	23.8232	24.2279	21.3434	21.2539	27.6819	19.2803	21.3987	27.1439	28.5529	21.2724	23.1362	27.4265	27.3391	27.2858	27.6426	26.9083
F13B	21.9874	26.3625	20.7127	19.9827	22.119	20.8923	21.3394	20.7583	27.2599	21.4278	21.5907	20.9165	20.9245	26.8495	19.6169	20.7909	21.8514	32.8957	20.1443	20.9516	21.0682	20.9842	20.66	21.7328	19.7837	21.1821	27.9035	21.3929	20.7206	20.9294	26.9375	24.0948	28.8983	27.6118	26.1358	21.5558	20.1415	27.2318	21.5364	22.1634	28.723	27.5689	20.7733	21.8548	27.261	27.1676	26.752	27.5497	27.0065
ISG15	27.1475	26.8899	27.697	28.2649	28.1137	27.6323	27.0807	27.5121	27.6112	28.1016	28.1884	27.945	28.7834	26.9404	28.5625	24.6749	25.159	25.4298	22.9926	21.916	20.5319	21.6436	19.7558	21.0236	23.0332	21.3623	21.8583	20.8243	24.2776	20.605	22.1248	20.8959	21.7992	21.6618	19.7477	22.3546	27.6706	25.0085	25.3479	21.6154	21.8527	21.7162	26.3324	24.6974	22.3273	22.3632	22.4117	22.588	26.1406
PCCA	25.7396	25.9028	25.4969	27.0713	26.2889	26.318	25.4577	26.2932	26.6096	27.8474	28.0337	25.7142	28.0714	27.1475	26.6495	25.6283	25.687	24.724	25.1552	25.994	24.8627	24.7451	23.2587	25.0097	27.1118	27.3927	28.0774	25.4526	27.6494	27.2509	25.9505	27.6935	24.9444	25.1982	26.7166	28.2482	28.1075	27.6023	27.9134	26.6714	28.5818	28.1576	27.7655	27.8617	27.8429	28.555	28.1325	28.3269	29.5665
PCCB	24.5323	24.4013	26.2234	25.2928	23.1318	22.6827	25.0324	23.9354	26.9792	26.9229	26.764	26.8554	27.0351	26.4782	25.9026	26.9106	27.3724	27.0552	25.7369	20.8424	27.2383	25.5347	23.84	23.2253	27.0503	26.3712	26.0168	24.8128	26.8855	25.8933	25.1608	25.9178	26.9045	26.6143	27.1075	26.2816	26.2752	26.7789	26.5414	25.2042	28.6809	28.5419	27.8488	27.7249	28.3406	28.6175	29.1114	28.9416	29.2466
IF2A	30.5359	30.5085	30.5023	30.4126	30.4788	30.649	30.673	30.8599	30.3798	27.3429	30.3919	30.2361	30.3419	30.3846	29.8093	29.6737	29.8792	29.0287	19.7979	26.8845	29.7571	29.2553	26.7739	27.6708	30.3221	29.4695	28.9157	28.4588	30.4178	30.3835	27.2717	29.0484	29.0106	27.7057	28.3297	27.4253	30.041	30.5304	30.1561	29.7581	28.8517	29.3483	29.4396	29.1211	29.4623	29.2124	28.9267	28.7422	29.9404
FGF1	25.8139	28.8541	25.5465	26.065	23.1801	24.211	26.1572	25.8731	21.0085	23.083	22.0748	23.8629	23.6214	24.2347	21.1944	22.4057	22.3301	24.0661	22.3869	28.3233	24.9259	27.0512	25.141	27.388	27.3099	24.3846	29.5453	25.4391	27.4239	27.6114	28.8209	30.2958	28.8787	28.7988	29.3661	28.0242	27.3341	21.5796	27.8592	26.2866	26.236	25.3362	25.6431	25.0219	25.4642	25.6208	25.4605	25.6905	25.1195
ICAM1	28.1183	28.1072	29.5136	27.8598	29.6591	28.4411	27.7238	28.0233	28.3342	26.4354	25.1443	25.2547	26.7718	25.5744	26.2102	23.7556	26.8249	27.3261	18.9104	24.2643	25.8714	27.2109	23.4589	25.0862	29.2381	25.0746	23.3873	20.4879	28.3438	26.0333	19.377	26.7879	20.8713	21.6991	20.8694	22.44	20.5077	20.8556	19.8737	20.0854	26.0295	26.7389	27.2322	27.0642	26.6079	27.5317	27.5592	27.2574	25.8218
RLA1	21.9844	23.9326	26.1272	26.833	24.7803	25.485	25.6289	24.9018	24.8097	27.1987	25.1098	25.7983	26.8242	25.4584	25.6171	26.8007	20.8495	20.6658	21.1082	19.6646	21.6404	20.86	21.4699	19.823	21.5388	23.1422	18.1797	21.1804	20.0992	23.525	22.1002	20.6791	20.5577	22.1863	20.8032	20.8738	27.2599	26.7195	21.6513	18.4137	25.6558	25.6734	27.3145	25.832	27.2963	27.4378	27.6345	27.4629	26.2785
TETN	20.2041	21.2266	22.0335	21.2413	22.2083	21.2113	20.1185	22.8296	21.3298	20.8749	20.6635	22.2067	19.4418	21.0987	20.9236	20.2025	21.9788	22.1733	23.5024	23.4363	21.8944	21.7096	20.9113	20.7284	19.9832	22.088	26.9117	28.4977	20.8359	21.9263	25.195	22.0235	24.7928	22.7123	24.11	21.4587	19.4014	20.2874	20.1553	20.3445	27.2432	27.1767	22.9188	23.0273	27.2172	27.4587	26.6327	26.6967	27.4113
LA	30.8605	30.5784	30.8751	30.2597	29.0663	28.9409	29.9239	29.6483	29.0229	25.4139	30.102	29.7867	29.6038	29.8988	29.7556	28.3305	27.1891	26.9374	27.1154	26.3849	27.1723	27.3449	27.0134	26.6608	27.217	26.7064	28.6197	27.4282	28.8313	27.5712	27.4024	28.8244	26.9686	26.1689	28.9838	27.4283	29.6438	29.1562	29.456	27.5095	29.2973	28.7927	29.586	29.9629	28.8645	29.9628	29.7851	29.8901	28.004
1A24	30.0764	30.2766	29.5172	28.8995	29.6573	28.9792	30.4351	30.3526	30.2151	29.685	30.8009	30.1962	29.968	30.0013	30.721	30.0561	28.2278	29.6044	29.2908	29.49	27.8902	30.4712	27.4922	29.1662	30.4306	29.8808	28.4054	26.4834	29.4178	29.0449	29.2013	28.1803	30.3121	30.3145	29.0281	29.1666	29.8077	29.6784	29.2532	29.4009	31.2935	30.7466	31.0962	30.6948	30.0712	30.1799	30.9065	31.2581	30.6679
THBG	21.717	19.2322	19.7588	18.9881	20.5388	20.1812	21.5939	21.1241	22.4012	20.6006	20.1341	22.5134	22.0944	21.5902	22.7794	22.096	21.4118	21.0786	20.6181	20.4889	22.4642	21.099	20.9036	22.4901	21.6141	21.7025	25.295	25.462	20.8441	21.0351	21.7596	22.1729	21.5264	22.2653	21.5182	19.9974	20.0667	21.6801	20.4493	20.615	25.961	25.2172	22.7015	20.7724	24.3307	21.8872	24.1638	24.504	25.904
HEP2	21.1044	22.6422	26.4928	25.7256	22.9928	25.942	23.3966	23.6593	24.8948	21.18	25.731	26.7953	23.5104	23.6465	22.8643	26.4019	21.0607	23.7342	25.1177	25.922	20.8525	23.9862	22.9249	26.3333	26.5342	22.0245	26.8397	25.4051	21.0461	26.0508	26.1829	22.9342	23.6565	25.1571	22.2599	24.4898	25.0976	21.9852	18.1067	26.2983	28.1768	27.9906	24.3229	24.2158	28.0886	28.2476	28.6748	28.4245	27.0959
KPCB	20.7825	22.0266	17.9885	20.796	20.0671	19.6114	19.9587	19.807	23.0347	22.1227	20.8876	19.8168	21.436	20.9456	19.1263	21.1136	19.852	20.2298	19.306	21.4222	21.7068	20.8657	20.8765	20.4787	21.5841	18.9177	23.3965	22.8093	19.9949	21.0426	20.5348	21.1814	22.5083	20.9731	22.6565	21.3011	22.1414	22.5021	21.6665	21.7351	21.8674	22.374	23.7961	24.231	22.0634	22.4443	23.6135	25.2042	22.6004
CALB1	24.9908	24.3633	22.0119	20.1892	19.3034	21.7947	19.9842	20.865	20.984	20.7503	18.3005	21.7984	19.9097	21.5477	20.8328	20.6724	20.0962	21.3715	20.2659	18.7791	21.1154	21.0088	21.3868	19.1772	20.603	20.8986	20.4722	20.5664	20.2425	21.2277	21.031	20.9704	21.1665	21.8479	19.9977	20.4149	19.803	21.3521	21.9921	22.0347	26.1755	26.0529	25.2744	25.2451	25.7422	25.768	25.746	25.4966	24.6119
CO5A2	25.7769	26.9568	28.1091	27.2539	29.3069	27.7462	26.26	26.4582	25.2556	26.8715	24.3155	26.5471	24.1796	21.7735	22.5181	24.784	29.1309	27.0696	25.8038	25.5283	26.4335	23.8224	25.33	23.7685	23.1552	26.4364	24.5503	26.4861	24.8394	26.2393	26.0123	26.1267	28.1396	27.1025	27.4996	27.4777	28.1372	25.9844	26.7115	25.8453	27.536	27.4523	28.8847	28.3343	29.1864	27.8984	28.3419	28.6546	28.6404
DCUP	28.9393	28.9512	28.5509	27.7496	28.5161	28.192	28.6647	27.7265	26.6462	26.0214	27.1134	26.9623	28.2138	27.8504	28.3118	27.4631	24.1853	22.3092	21.4141	24.0872	24.2772	23.8558	22.4895	21.167	26.0003	25.5714	21.0871	22.5078	26.5547	26.3651	21.7094	20.3674	21.1083	23.258	22.1311	21.1259	26.926	25.8615	26.2642	25.1849	24.0508	25.4618	25.4653	25.7678	22.7443	25.0141	25.0624	26.2985	23.5205
AGAL	24.1566	21.84	25.1482	24.9886	25.3427	25.3324	21.6381	21.6177	27.7956	27.1475	26.4062	27.1119	27.2107	27.1675	27.1357	25.4949	21.565	20.5311	20.8574	20.7866	21.4072	21.1385	23.8433	20.8098	24.4344	23.2825	21.5112	20.0061	25.4706	21.982	26.757	19.9793	20.9537	22.2001	21.1239	21.2479	24.342	25.9128	22.4621	25.323	24.4462	24.9003	24.6014	24.8219	24.8809	24.9403	24.9379	25.0616	24.4887
KV206	19.3461	19.8932	20.5094	21.7542	20.2926	21.5591	20.3142	20.7782	21.3478	21.4241	21.5175	22.1397	19.7098	21.6325	20.2362	22.3228	18.7805	20.4759	20.9279	21.1999	20.4064	20.9591	21.0849	21.5001	21.1126	20.4168	26.3466	26.188	21.7886	21.9735	20.7735	19.6312	22.2733	20.6297	20.2048	22.1137	21.6982	20.7959	20.4167	22.4671	26.8713	26.8832	23.9165	21.4526	25.933	27.156	28.4653	28.4259	27.0245
CO2	19.5123	21.4203	19.5759	20.8067	20.4347	21.2501	21.219	20.1792	20.4779	20.5178	20.6595	21.6114	20.3439	20.4357	20.9741	20.7394	18.926	20.4323	20.8126	20.4938	21.1326	21.3518	19.6064	22.3578	19.7705	21.4352	19.9146	21.2488	18.3052	21.9082	22.1475	20.82	22.42	21.875	21.5343	21.7607	21.1026	22.0825	22.1802	20.6003	25.6712	24.7076	24.36	21.6549	24.5583	24.7201	24.6941	24.7037	23.4935
S10A6	21.0951	20.395	20.7288	21.6465	26.5933	25.5081	25.3486	25.9493	25.3345	23.995	27.0973	26.2898	29.4516	27.7824	28.573	27.0307	31.3749	27.989	28.4581	29.8366	30.1145	30.5114	30.8885	30.757	27.4399	27.4714	26.5362	27.9118	26.4563	27.6396	26.6469	24.0004	34.5236	31.8747	27.5101	27.291	26.069	26.0542	26.6172	27.6032	30.3095	30.7524	30.0673	29.7969	29.2547	29.5703	28.7841	29.1186	29.8602
PYGL	29.2584	29.5331	31.1378	30.368	30.3496	29.2096	29.7406	29.1635	27.7938	29.0504	30.0478	29.0865	30.8693	29.9296	31.2267	29.85	25.5239	26.5148	26.9028	26.7461	22.8847	25.8287	25.8322	23.483	29.1959	29.3242	28.3844	27.4165	28.1793	28.4487	27.5045	27.8689	29.2978	27.5903	28.322	28.8005	29.8858	29.0926	29.139	29.0076	30.3394	30.3602	29.9516	30.1993	30.3087	30.4243	30.0012	29.8034	27.2246
NPM	29.4827	28.0396	29.4085	27.9272	27.727	26.4151	27.6148	27.6253	26.3683	30.1199	28.2436	26.9001	29.7099	28.6784	30.594	27.6418	27.9172	27.7874	28.8618	28.8428	21.7718	24.8997	26.6862	26.3502	31.4211	30.2055	29.5167	28.8202	27.9304	25.7801	27.3679	21.3701	28.9301	28.5254	22.9955	23.4362	32.1523	27.6364	28.862	27.5611	27.4774	26.2287	28.7254	30.0029	29.8299	29.7907	30.5736	29.8768	28.8889
HEXA	22.5851	23.2176	29.2815	27.1506	30.4119	28.2484	27.3996	25.6842	26.0887	24.3211	30.5072	27.0206	29.8994	26.9379	29.4335	27.5891	20.2139	21.7434	24.485	24.007	22.1542	20.1662	21.2942	20.9535	22.9041	24.0469	21.5259	22.9303	23.2354	25.2559	22.5604	20.1556	21.3676	23.2977	21.8728	23.5005	23.6564	24.4019	23.4308	24.8609	22.2453	22.7095	24.5198	23.7223	25.6057	25.193	24.6247	24.8651	23.5312
TY3H	22.4789	18.2547	18.8379	17.9497	16.5082	17.0224	18.3214	18.7027	21.0583	16.3731	15.4993	20.3383	18.7235	17.1555	16.7163	20.7697	22.3303	18.9086	21.9249	21.4295	21.5064	22.2589	19.0708	21.2537	20.442	19.6146	26.8831	25.1919	20.2983	21.3766	24.8007	24.9375	23.9264	22.8786	22.4611	23.9071	24.6449	22.4666	18.4625	21.8976	28.9887	30.122	30.5853	30.7751	30.7656	31.2933	33.3256	33.4724	28.0934
ACBP	30.0501	29.702	29.6679	26.765	30.4041	29.2398	28.8309	27.0953	26.1892	22.5633	32.3515	28.6133	31.6877	25.2473	32.2613	30.3226	30.035	29.0189	29.9224	28.8465	25.1869	27.4612	28.5049	29.6568	25.2298	23.5608	30.7353	30.4501	31.4779	27.4436	28.4805	31.8524	30.2429	27.8626	30.4813	29.1349	30.7701	28.1144	31.3493	27.9549	28.2909	29.0846	28.3986	29.2149	29.19	30.219	28.6737	28.5757	26.2339
LDHB	32.6652	32.8598	33.5367	32.5835	33.2721	33.016	33.5558	33.4146	32.8646	32.4326	33.3216	32.17	32.9727	33.054	33.5241	32.5872	30.1273	31.6271	30.8145	30.7363	31.0326	30.3658	29.4793	30.5619	32.6571	32.8964	32.6818	32.0555	33.0766	27.9568	32.0155	32.6166	32.3535	30.7941	32.3445	27.6332	32.435	33.1926	32.8618	30.9609	32.51	32.6226	32.5602	32.6266	32.6873	32.7844	32.6944	32.3948	32.5605
GPX1	28.4217	28.4697	27.8237	27.2764	28.0819	27.6952	27.9596	26.9404	28.5642	26.6234	26.2188	26.0312	28.6644	25.5656	28.7313	27.4845	26.8419	24.6035	24.8093	27.041	25.9682	25.97	27.0833	26.5242	24.2121	22.1323	26.3872	26.0379	26.8492	25.4364	24.7533	24.3233	27.2768	25.3249	25.2542	24.938	27.2805	27.1025	28.0382	25.2223	29.3751	29.2195	29.1112	29.4026	29.565	29.3803	29.1231	28.9335	29.5289
PDIA1	34.227	34.094	34.7192	34.0496	34.6791	34.1525	33.922	33.2515	31.7276	32.8743	33.3356	33.0002	33.2671	32.5823	33.2837	31.8878	31.5768	31.9867	30.7403	30.5265	32.5548	32.8339	30.8732	30.9757	31.8359	31.0977	30.9394	30.8255	33.1581	32.3984	30.7742	30.5885	31.1078	30.3273	31.0328	29.5162	32.6878	32.3913	32.716	31.4476	32.4265	32.3038	32.5733	32.495	32.3479	32.3994	33.1689	33.1158	33.3815
H10	26.2682	26.1047	22.8223	23.9819	20.1592	22.7569	20.5814	23.267	27.3833	26.66	23.5652	22.8496	27.4054	24.0285	25.7236	25.2666	25.8598	28.7803	29.4066	30.1256	26.1339	25.9845	26.9487	28.4634	29.0136	28.5953	31.4527	28.7975	29.6886	29.9007	29.024	30.9537	31.5067	30.6172	30.0899	30.0471	28.4389	25.7601	29.55	28.8325	30.1521	30.4208	31.5099	31.4875	31.4196	31.5554	31.3166	31.5415	30.5917
CRGD	19.8777	20.8828	21.5438	20.1508	20.7937	21.2473	19.1251	20.7459	21.7815	21.4945	21.8123	21.3127	20.7693	22.4221	20.507	20.6483	21.3647	22.1084	21.0356	20.6666	21.6502	20.5709	19.8962	20.1363	21.5046	22.4928	20.407	21.2145	19.9861	21.3154	20.9308	19.8875	21.2397	20.5209	21.1556	21.5085	18.7584	21.3838	21.9681	21.1921	22.0689	22.1361	22.2879	20.8678	21.8437	22.9057	21.5533	21.6051	21.26
CSF1R	20.3513	19.8478	19.7809	20.5083	21.0528	20.1148	23.4491	24.0581	21.3767	25.0292	22.6972	23.0966	20.6464	21.0714	20.8832	24.093	25.3262	20.8209	20.9073	22.4065	20.5619	20.0345	21.334	20.8355	23.6621	21.4667	20.2217	20.3905	21.1278	20.4422	22.2717	22.075	20.6477	22.6776	20.9801	21.3487	20.2827	23.4579	21.0764	21.254	23.0605	23.0667	22.3218	21.6872	23.8835	22.5479	23.8855	24.0587	21.5565
CATD	33.2779	33.1877	32.7762	31.5185	33.6547	32.9423	32.8777	32.3728	29.6394	30.739	36.0761	35.6618	35.8223	35.1607	36.8039	36.1717	32.3504	32.0849	30.2735	30.3416	31.2595	33.0144	28.3442	29.3413	34.1245	34.4011	31.3207	30.4968	33.6621	32.2632	29.7039	31.3579	31.2932	31.5543	30.8539	29.6692	33.9339	34.3758	33.9451	32.3809	32.001	31.947	30.9338	31.1506	31.9976	32.2293	32.396	32.3495	33.0643
CO8A	22.0999	20.63	20.9714	21.8896	19.5893	21.0737	20.2949	21.364	24.8161	24.3656	20.2462	22.5989	20.681	20.7834	20.8738	21.3497	19.0343	21.2128	27.8759	28.2833	22.1134	20.7387	27.3714	25.8319	22.5144	21.6944	26.1458	25.9993	22.5017	20.2561	21.7403	21.541	26.1023	25.8025	24.5753	25.0459	19.6281	21.2788	21.1437	20.8288	28.8999	28.68	20.7172	22.7644	27.0269	26.953	26.3736	26.3193	28.2094
CO8B	21.1319	21.084	19.7787	21.5996	20.823	21.2988	21.1427	20.8652	23.3396	23.4972	20.3489	22.194	20.3538	19.578	20.1899	20.2195	22.5858	21.1419	19.9056	23.8442	20.0225	20.6643	21.0304	20.9787	20.1694	21.4298	25.2281	21.7085	21.5331	21.3026	20.7091	21.8747	23.2436	23.4817	19.9601	20.7037	21.2325	18.9738	19.6019	21.4629	28.31	27.8796	20.7872	21.4864	27.7933	27.0938	26.7235	27.2166	27.7308
CO8G	21.1514	21.2038	21.2953	21.4872	20.7524	21.0763	19.2566	20.9186	23.912	24.3504	19.4474	21.5061	20.7636	21.4374	20.4417	20.2153	22.261	21.9587	25.7429	23.8607	20.7306	20.7888	22.1596	21.8505	18.8984	20.515	26.4731	25.5698	21.924	21.6741	21.8551	22.3496	25.8797	25.1945	23.2863	23.5335	19.1684	21.1225	20.6815	20.8003	29.092	28.5364	21.7383	22.5713	27.5991	27.4674	27.573	28.3782	27.3718
CAN1	29.3712	29.5643	30.9569	29.4996	30.6694	29.2542	30.1937	29.2021	27.9704	27.862	29.7434	28.7944	29.8187	28.4988	30.4109	28.906	27.7585	27.8011	26.8469	23.8739	25.6367	24.6861	27.4481	28.0758	29.8685	26.0023	29.6392	26.1731	28.7296	27.7555	28.1644	30.0493	29.9738	26.6702	29.7525	28.1211	29.0888	27.8007	29.6118	28.1109	30.7142	30.1988	30.5893	30.446	30.765	31.0833	30.5833	30.6163	30.5614
TBB5	35.8098	35.6625	35.6257	35.2098	35.6612	35.3805	35.3383	35.1999	33.0054	33.5504	35.7366	35.4117	35.7199	35.543	36.09	35.9392	35.6098	35.7832	35.8864	35.9702	35.07	35.1145	36.1121	35.6103	36.561	36.0609	36.4285	35.5476	35.8881	35.3689	36.0564	36.663	36.1499	36.0342	36.1649	35.5266	35.9091	35.3911	35.8538	35.0688	37.1164	37.1235	36.4561	36.4426	36.7665	36.7991	36.6011	36.5978	36.5952
HEXB	30.6234	30.7131	31.1531	28.5527	31.3067	29.3808	30.4217	28.3857	28.6611	28.0821	30.7203	28.9953	31.006	28.3404	31.1308	28.8234	24.472	25.0813	23.7838	21.7579	27.7467	27.6899	23.0973	24.4176	28.4176	27.7239	22.3172	21.763	29.4513	27.2522	23.5678	19.1174	25.372	25.8715	23.1602	23.4852	28.8661	26.865	28.3657	27.6832	27.0692	27.2109	26.9159	27.017	25.5644	26.279	28.3759	28.5454	27.8835
CATL1	27.1437	27.2321	26.8729	24.5997	27.307	20.3836	25.9178	24.4852	28.7629	28.7614	26.8925	25.4766	27.9638	25.8862	28.4683	25.7981	20.5134	26.684	19.5825	25.9876	27.7712	21.2168	21.4338	21.2573	22.4527	21.4475	25.3455	25.8531	26.3972	26.9325	23.8166	24.6094	20.7161	22.3956	21.0676	22.4087	27.1704	25.9609	25.695	25.7075	21.6653	22.2941	21.7428	21.9582	22.2708	21.1325	22.8732	23.4756	21.234
PROF1	33.7785	33.4402	33.7141	32.7768	34.0647	32.0696	33.0298	32.8431	27.9034	29.5814	33.1385	31.1415	32.833	31.2081	32.7302	32.5765	31.7869	32.2165	30.0003	30.9249	30.3061	31.1205	31.3429	31.9723	31.1601	30.2963	31.8958	27.956	31.1352	28.1273	30.8831	31.6814	31.6469	31.5534	31.2481	30.9461	32.6619	30.266	31.9818	32.3152	32.616	32.5355	32.7365	32.5616	32.7689	32.8664	33.1772	33.162	31.7536
APT	29.7461	29.9878	29.7996	29.9342	29.8162	29.3043	29.9732	28.1982	29.2952	29.2635	30.7067	30.0165	30.7182	24.2455	29.7292	30.1838	29.2561	26.8691	28.4126	28.7024	30.3299	27.9403	29.1337	24.6378	29.7088	29.5425	29.3011	29.3608	30.4047	30.0025	28.962	29.1966	29.1728	27.984	28.4403	27.1242	30.1282	27.244	29.4968	29.5638	29.532	29.4749	30.0021	30.11	29.8855	29.7274	30.0592	30.1051	29.1071
SYEP	31.4919	31.7182	31.8597	31.1285	31.8687	31.3977	31.5736	30.2092	30.4591	30.9682	31.0648	30.2781	30.4628	30.1691	30.0131	30.0305	28.7837	28.2167	28.875	26.0845	28.4051	28.0641	27.2483	27.223	30.4143	29.1462	28.2388	27.6867	30.0096	29.4033	28.0782	28.2867	27.3401	27.2796	27.7095	28.4071	30.2633	30.2006	30.1012	28.6054	29.4347	29.8726	29.7548	30.0145	30.3727	30.4447	30.8863	30.6345	31.3903
CATB	33.2114	33.2644	33.5524	33.272	33.6145	33.6216	32.3887	30.1782	33.9348	33.0901	32.7969	30.8042	32.9162	32.4619	32.9834	31.1761	32.0124	31.2601	28.8619	29.2375	30.7943	31.5335	29.1806	29.1623	30.0465	30.817	27.6943	29.0388	31.6111	31.1236	29.1383	28.5231	28.9228	28.271	28.9797	28.835	31.148	31.4972	31.0889	31.1122	30.6181	30.6406	29.9936	29.9181	31.0063	30.8873	30.3901	30.5652	31.5174
HS90A	34.8371	34.6855	35.3914	34.5125	33.967	33.8533	35.119	34.748	34.4683	32.5822	35.0551	34.6304	34.8877	34.7898	34.9777	33.6573	33.9713	34.1289	33.2306	33.3496	34.0372	34.0963	33.7927	33.9389	34.1746	33.8149	33.9773	34.2831	35.1101	34.7539	33.4648	34.3735	34.4761	33.09	33.846	33.4797	34.2666	34.4372	34.5689	33.4032	34.8098	34.9341	34.7792	34.8474	34.9114	35.0218	34.8839	34.8573	35.3718
HNRPC	27.616	27.1777	27.4196	25.6806	24.5582	20.2192	25.2198	25.011	27.9626	26.9188	26.23	26.6534	28.7985	25.0828	26.5855	27.9576	29.1562	29.323	28.249	28.4649	29.5746	30.5008	29.5783	28.9616	30.633	30.2149	30.4598	28.5763	30.3951	30.7087	28.8878	29.9882	27.6359	27.127	28.4485	27.9913	29.5382	28.2261	30.3541	30.3087	30.5898	30.8579	31.4369	31.3526	31.3223	31.4664	31.4967	31.6492	30.5671
QCR6	27.2305	27.7863	26.3038	25.348	25.8505	26.2376	26.6242	25.0116	25.4071	28.1293	26.6136	26.7507	27.9746	23.9326	27.7901	25.547	25.4937	22.1366	25.9526	26.2342	21.2113	19.2155	20.3328	20.3273	19.5769	21.0211	22.9089	27.9896	24.9027	22.0323	25.0003	19.9972	26.1071	26.521	24.1629	20.7667	28.1882	26.8829	26.1017	22.5084	27.1796	27.4601	26.9873	27.3642	26.6	27.127	27.2218	27.4734	26.9783
LYN	20.1999	21.4611	20.3499	20.4887	20.7253	21.2405	21.0542	20.1777	24.1077	22.3875	20.681	20.9123	20.4799	19.8261	21.5944	24.5579	20.4152	21.2621	20.6964	19.1345	21.4222	20.9947	20.7446	20.9714	20.8908	20.8318	21.1297	21.7079	20.4631	20.6933	22.1917	22.8226	22.1488	22.9773	19.5778	20.503	20.8546	21.2358	21.3706	21.6067	23.5833	24.0844	24.8774	24.2983	24.5525	24.6433	25.1218	24.974	20.1562
FUMH	30.1447	30.0513	30.4842	29.843	30.2646	29.738	29.9624	28.8031	28.6751	29.8249	30.2285	30.0907	30.5017	29.7279	30.276	29.8105	28.9725	28.6372	28.3676	28.382	27.7664	27.9816	28.5714	28.2549	27.6966	28.6305	28.7695	29.6161	29.2115	29.6472	28.6262	29.5979	29.6855	28.9774	29.1076	29.2097	29.7487	29.4533	29.6614	29.6987	30.1234	30.1476	29.9251	29.9751	29.7546	30.066	30.8095	30.5464	30.4176
TSP1	31.6235	31.6495	33.3942	32.6903	32.9649	32.2654	33.3757	32.0856	28.5449	28.3561	24.4511	27.619	30.0621	29.8322	27.6145	28.6729	30.8017	29.6383	28.5053	29.1989	28.5914	28.0952	29.451	29.1726	28.9152	28.0921	31.1703	30.9597	30.1955	29.5473	29.9093	30.4301	30.5791	28.7486	29.2278	28.9899	28.1704	25.8985	27.5076	26.2624	28.4553	26.9027	27.7846	27.4504	27.8948	28.6627	27.6796	28.1218	27.5919
SP1	20.6701	20.5632	23.0045	20.286	20.0922	22.1091	19.5366	21.9518	24.1057	22.2167	24.5226	21.3776	19.1805	21.3568	24.2148	24.9688	21.008	22.683	21.2413	20.6415	20.967	20.4376	21.1978	20.3556	20.9407	20.6699	22.5341	21.964	24.2534	22.3895	21.5799	21.3882	25.9541	22.6908	21.2002	20.8317	20.2139	20.9306	21.527	20.0565	22.2931	24.2257	24.5434	24.2575	21.1836	21.0267	24.5649	24.795	24.5419
IGF1R	26.7684	22.0182	25.304	21.4727	20.4635	21.8464	24.2022	20.8509	24.93	21.712	25.329	26.7005	20.6339	28.8534	23.6684	20.6069	28.1659	20.8905	20.5816	21.4287	27.9204	27.3083	20.5001	21.3605	20.8546	21.8199	24.2795	20.6404	24.1551	25.5848	22.8582	19.587	21.092	29.1694	23.785	28.1374	22.3172	21.9905	24.8655	25.3407	26.0724	26.0095	20.4258	22.0459	26.742	25.0424	24.7117	24.3572	25.9824
HSP71	32.5107	32.8311	32.5686	32.4786	32.5303	32.545	31.9661	32.0255	32.0645	31.484	32.9506	33.3856	33.166	33.3196	33.1589	33.4764	32.0232	31.9863	32.5128	32.1656	31.6717	30.7445	32.4612	32.3839	32.5784	32.6369	34.1926	33.9625	33.1144	32.5468	33.7366	33.9511	34.0198	33.8872	33.5723	32.8241	33.4936	33.1901	33.1101	33.2405	34.2805	34.3274	34.0477	34.0916	34.2929	34.2949	33.9811	33.9512	33.9957
RHOC	28.1527	28.0261	28.0574	28.431	28.5152	27.7083	27.8135	26.952	22.0164	28.7801	26.063	25.1188	26.9568	26.6085	27.0046	24.8651	21.141	20.438	23.9358	21.3294	25.3607	25.7371	20.0403	20.5118	29.1669	28.916	29.1467	28.7204	28.6948	23.0703	24.1089	29.5275	29.2531	23.6553	28.231	28.9895	28.5217	27.7761	28.1807	21.8764	28.8212	28.671	28.615	28.7151	29.0902	29.1517	28.8653	28.1518	22.2578
TNR16	27.1699	27.6449	26.1075	25.1863	28.9747	27.743	29.0511	28.317	29.7105	28.743	34.0622	33.715	33.3315	32.2502	32.6732	30.0614	29.0644	29.8626	26.6136	29.2086	28.0452	31.2251	29.592	29.3979	30.2564	29.6568	28.9219	27.6387	29.4317	28.9309	28.0355	28.3221	29.423	26.8202	28.6202	28.2699	30.6756	30.406	29.5373	29.2299	31.3769	31.6727	31.3554	31.323	31.1762	31.217	29.866	30.3031	29.7541
MDR1	20.1584	22.109	19.3041	21.0639	20.4534	21.6658	20.7091	23.5551	20.1945	23.487	24.9554	24.4137	22.9086	23.5191	21.849	23.9122	22.1798	18.9413	20.4613	22.679	20.4278	23.0954	21.6579	22.2634	19.9833	22.7418	22.2852	22.2459	23.343	20.1951	23.127	22.1966	22.8327	21.7373	21.9916	21.9528	23.0894	23.4651	20.9117	20.7771	29.7934	29.4511	26.8385	27.3474	25.5828	25.1425	26.3044	26.1836	29.5219
CBG	25.8554	24.9595	23.1032	21.1565	22.1652	21.6412	19.1993	21.1781	25.6333	22.3345	19.8256	25.9016	21.6243	20.7424	20.9822	21.5652	20.7844	20.7463	25.5427	25.144	22.4501	20.354	19.4437	22.1601	21.3769	21.3511	25.2447	26.5424	21.1632	20.357	21.9006	21.8412	20.9875	22.3458	20.6051	21.408	19.4925	22.6375	23.8995	21.7698	26.0802	27.3259	24.9937	24.3484	26.2008	25.9431	26.2114	26.3573	25.8439
BGLR	24.7	24.2158	26.0591	25.386	27.0164	26.8403	24.3953	24.5926	27.5807	27.8906	27.2168	26.3083	28.5541	26.1208	27.7934	27.4028	22.0814	20.6132	19.8673	21.6899	20.3438	21.471	20.9132	21.5103	23.9989	24.2426	24.4553	21.3205	25.1565	25.388	22.3157	23.7004	24.8215	25.5678	23.9568	19.985	26.5098	25.7405	25.2443	25.1471	26.359	26.5676	26.5956	26.3113	26.6195	26.1466	26.9999	26.9596	26.0884
HS90B	33.612	33.6373	34.287	32.8932	32.7412	31.812	34.1486	33.4232	32.0454	32.0469	34.0542	32.1488	33.5196	33.3127	33.595	33.3331	32.5629	32.3718	31.1921	31.2364	31.4993	31.5826	31.5312	31.3394	33.0666	33.6884	32.0885	31.6079	33.3957	33.4551	32.0331	32.0978	31.6829	31.4651	31.2813	30.4281	32.8192	32.6139	32.7605	32.0701	33.3499	33.5189	33.0311	33.1176	33.0435	33.0375	33.1753	33.0988	34.3186
SRPR	26.7335	27.4443	29.0685	28.6583	28.0499	26.7745	28.2896	25.7411	26.7352	25.0191	26.9013	26.1727	26.8675	27.1811	26.545	27.414	24.1635	26.71	23.4214	24.1074	23.227	25.1068	25.4636	22.491	25.9283	27.2482	24.2622	28.4844	27.9401	26.1705	26.4446	21.1883	24.5247	26.0875	20.3053	25.9491	28.1518	28.4019	26.991	26.2713	26.889	27.9404	27.0353	27.0264	27.7834	27.7832	27.869	26.8811	27.8077
ASNS	26.3398	27.9333	30.2342	27.6057	30.7709	28.2819	28.1806	26.8065	21.0056	21.811	22.5517	23.964	24.9984	20.9413	23.119	22.7031	20.8014	20.5208	21.2805	19.5144	21.4669	20.8169	22.6115	20.3771	25.1927	24.9242	21.4109	22.063	24.6234	24.5887	22.9333	22.041	21.4556	23.187	22.6146	19.1128	21.9844	22.6807	24.8625	21.2167	23.2103	23.8347	22.4771	22.6083	24.6558	24.1411	25.6559	25.9208	25.1708
MMP2	23.1784	24.237	23.949	24.4512	25.7468	25.3562	23.4691	23.7764	22.3855	23.2857	23.396	24.1599	26.362	25.6705	25.4389	25.7315	21.191	21.2322	21.3785	20.0285	20.451	20.4606	20.9147	20.5528	22.3523	22.4396	25.8815	25.8713	24.29	24.1722	24.9748	24.5203	21.1362	22.7408	22.2606	20.7738	25.3361	25.2132	27.1799	25.8088	20.5952	22.9722	21.3257	20.56	22.6189	23.4658	22.7233	22.8315	21.3482
MMP3	28.0205	21.3793	21.0678	20.0996	21.4357	21.0233	21.4228	19.5854	25.4832	21.2703	21.1993	20.2463	20.678	20.9656	19.5382	20.4396	21.1205	20.3272	19.9847	20.6185	19.994	20.5407	20.6725	20.4749	20.5349	21.7814	19.7046	20.2462	20.0962	22.339	22.2372	21.0747	21.7071	21.3387	21.704	22.4778	20.2047	25.4437	20.8114	21.4155	21.6979	24.2613	19.6773	20.736	20.3261	21.5744	23.4589	23.1461	22.0357
NEP	21.8331	21.7343	20.1488	20.7992	19.4293	21.1854	20.4088	20.8507	23.4726	21.9976	21.9377	22.1077	25.8947	25.4402	25.4789	24.8337	25.3013	21.357	26.6527	23.781	21.3471	21.3519	25.4787	21.0533	30.9106	27.9247	30.7885	29.5546	30.7214	27.2009	29.0395	31.965	30.7877	27.734	31.3529	29.4467	29.8492	28.4944	30.7034	27.7528	22.725	21.0014	22.9517	23.6337	23.8909	24.0383	23.6577	23.8446	20.6797
PLEK	20.5894	26.4392	24.0102	20.5148	19.4757	24.1506	20.8467	21.5244	22.1424	21.0682	22.9166	21.4633	20.6963	22.8938	19.4853	20.9939	21.2711	24.346	21.1466	20.8889	21.1054	21.1114	20.5445	20.8208	22.9572	20.0389	21.3052	21.6814	21.4356	20.6825	21.0211	22.0336	22.3239	25.6866	20.427	22.6391	20.5902	24.1112	21.7042	21.1054	21.393	26.486	26.08	26.0672	20.5515	26.9129	27.4725	26.7996	24.4509
CD14	21.6572	22.2178	20.9055	21.312	21.4653	22.1453	20.2952	23.1108	21.9866	20.7076	20.4676	22.3462	22.6435	21.5942	19.4379	20.0614	23.6082	24.138	23.3027	21.8416	21.3171	21.322	20.7364	23.3489	19.9235	21.8609	25.7035	22.772	20.5979	22.6262	22.0511	21.2475	25.9003	23.1832	24.0241	23.9689	19.8971	21.7865	22.2864	20.9301	27.9933	28.123	28.1144	28.126	29.7185	29.1897	28.8594	29.0389	27.5879
CO4A2	24.6139	24.4344	28.226	27.9928	27.9084	26.7528	27.2087	28.5442	25.4006	25.33	26.9222	27.1951	26.8152	25.7012	25.9202	26.448	33.5538	32.831	33.1449	33.0773	33.4193	33.2342	33.4996	33.645	32.4906	30.5132	34.562	33.8065	33.9435	33.5205	33.4081	34.0165	35.0442	33.808	34.6758	33.277	33.7212	33.96	33.9134	32.7816	32.1661	31.7648	32.2725	32.506	32.1493	32.3259	32.1326	31.89	32.0208
PTPRC	22.2137	22.2012	19.8033	21.14	21.1532	21.8463	19.3958	21.9879	22.3347	20.2376	19.8774	20.9023	21.1948	23.5874	21.1258	21.3263	19.7695	21.285	20.1724	22.0177	23.3164	23.2439	20.0383	23.8834	21.647	20.0954	21.1438	23.5001	20.547	21.5847	20.6077	18.9982	21.5691	21.8237	21.1335	22.7933	20.7207	21.3067	21.3191	21.3934	27.758	27.6473	29.6089	29.487	28.5973	28.7462	30.4677	30.6291	26.0038
RU2B	20.3295	19.9738	24.7776	24.5864	23.4251	21.7492	20.3542	23.3305	21.5048	23.1642	20.126	20.5776	21.4365	23.0159	22.2771	25.9067	22.2793	23.9642	20.8592	20.6245	21.4356	21.4399	20.8887	20.8387	24.9096	23.2798	25.2659	21.7925	25.1614	24.0893	23.6754	21.6966	24.4909	21.8189	22.5573	20.9861	25.5045	24.722	25.3385	24.6993	24.8478	25.2002	25.398	25.4971	25.465	25.9263	25.6886	26.352	24.7571
MET	23.2772	23.2983	20.1971	21.5423	20.2894	19.1747	19.535	21.2168	24.896	24.0851	26.6779	24.0239	23.4977	23.3597	20.9329	24.3973	21.2529	22.0005	20.4609	20.0818	21.1927	21.1983	20.9917	20.7989	19.3599	20.975	19.913	21.9547	19.7826	20.0696	20.7772	20.8736	24.2451	20.3969	20.2469	21.178	22.5988	22.6383	20.9946	20.9489	22.34	21.2384	23.2212	22.3576	21.882	19.8361	22.5751	22.849	22.2431
CFAH	20.8604	21.7027	22.2853	18.5139	21.4186	22.5337	20.6652	22.2528	23.3207	22.2327	18.625	22.9532	20.3841	21.5252	20.7914	23.2011	21.3648	21.908	31.5938	31.7853	29.6133	21.5903	31.6377	31.8854	21.4881	23.3897	31.5879	28.3538	21.4558	21.4049	27.3183	29.9963	32.2518	28.3632	31.0545	27.4934	24.3518	23.4015	23.6847	25.2197	32.6384	32.2329	28.6571	29.0851	31.5461	31.8984	32.3288	32.4238	32.314
RU17	25.2052	25.6895	22.2552	22.3056	19.8712	21.1572	23.2169	21.832	22.3107	24.8798	20.4291	22.3619	25.5403	25.3581	25.2212	23.3533	24.4671	23.196	19.4226	22.5643	24.8993	24.1471	23.5479	22.2356	28.5799	27.4131	27.4882	28.3957	28.4626	26.119	23.3636	24.3489	24.4415	25.6292	25.7169	24.5769	28.3279	26.2923	26.8866	26.3299	26.5839	25.0163	27.4286	27.601	27.5609	28.1192	28.0318	28.3781	26.9447
HCK	24.3087	24.4248	19.51	21.2714	22.1954	20.4016	20.29	20.5509	22.2975	22.4738	22.0574	21.998	20.8317	21.4445	19.9044	21.2524	21.4977	19.7337	20.8669	20.9138	20.5414	20.5506	21.9121	22.3431	20.9666	21.5728	21.5858	20.9489	20.6957	20.9066	23.143	22.0492	22.1273	21.6655	21.4112	21.7662	20.5349	21.141	21.4807	20.8299	23.4261	24.2254	24.6356	24.9099	23.139	24.0336	24.8451	25.0664	23.8412
ITA5	29.8182	29.9864	29.5143	28.2556	29.0767	28.3704	30.3164	29.2279	25.5821	22.6347	28.9987	28.5372	29.1502	28.4251	28.0479	27.2181	27.5979	27.3744	24.8866	26.7173	25.0792	25.4028	23.9129	24.8993	26.1339	25.3007	25.1464	24.5353	26.4047	27.4551	25.4029	26.1608	24.6672	28.0878	26.6071	27.2211	27.4619	26.2788	27.495	26.6846	20.7494	20.1435	23.2183	25.6761	25.194	23.4057	18.8213	23.6193	21.3563
A2AP	20.9056	19.9004	20.627	21.9641	20.4436	22.058	24.005	21.6826	23.9587	21.2548	20.7416	23.1781	20.6617	19.2971	21.3295	24.4247	23.5255	20.9428	20.8684	24.1982	23.1975	22.7227	20.8663	20.1501	23.7846	27.5554	27.1524	26.1263	21.3332	24.2243	21.1264	23.4372	22.5119	20.8032	24.7057	24.5159	21.2054	24.4068	20.9821	21.389	26.8859	27.6424	22.8051	20.4716	26.397	25.0297	26.5219	26.7412	25.5517
RS17L	29.8785	29.9966	29.402	29.3765	29.8108	29.4109	29.0877	27.3916	28.8036	28.8903	27.8355	28.2723	28.0789	27.5289	28.1223	28.64	29.83	28.4152	27.8343	27.1404	30.9358	30.6819	28.4608	27.9036	30.0646	29.8467	28.0091	25.8072	28.993	28.6017	26.5722	27.0092	28.7413	25.8813	27.3688	28.5026	29.1408	28.7449	29.2182	27.1402	29.5668	29.2879	29.8714	30.0603	29.9855	29.9163	29.8688	29.6076	30.3458
GNAI3	26.529	26.6327	26.8889	25.8635	27.1609	27.0532	26.8753	26.3251	27.3951	27.1171	26.6231	27.2275	27.0646	26.0413	26.7582	27.5321	20.4209	19.9506	23.3918	21.1889	22.7254	21.7093	22.0971	26.2842	28.7689	23.2116	27.5701	25.876	27.6324	25.4139	28.5627	28.2143	27.9888	28.66	24.7328	27.8876	28.3817	27.6471	27.9935	25.6282	28.378	28.6464	28.5393	28.4399	28.6418	28.5703	28.5219	28.5597	27.8446
ANXA5	35.0691	35.2172	34.9583	34.2672	34.2562	33.8117	35.2359	34.1706	32.9166	34.62	34.9643	33.1787	33.7323	33.97	34.7285	33.9508	34.2697	33.9196	33.2688	33.1651	34.2149	33.9514	33.6153	33.5809	32.4578	31.5741	32.9833	32.7724	33.3013	32.5011	32.8871	33.3348	34.5287	34.0147	33.621	32.7201	33.9296	34.4545	34.1998	34.7813	34.92	35.1345	35.2576	35.2614	35.2778	35.2931	34.9505	34.8906	34.483
STS	20.2071	24.0615	25.1742	22.8106	22.9516	23.4881	22.4686	22.3397	24.8005	25.0221	23.3472	23.1087	25.2719	23.881	23.8968	24.1	22.8362	23.6894	23.7314	23.4065	21.7065	21.5966	23.2572	21.3194	24.1618	25.99	25.8693	23.3578	23.656	23.4105	24.7711	24.925	23.5588	22.764	25.2162	23.5117	20.1116	22.9519	24.843	21.4208	25.973	26.1146	26.101	25.7525	26.2444	26.315	26.7961	26.8401	27.4407
CEL3B	19.9352	20.6666	19.2324	21.3886	22.6894	20.373	20.3161	20.92	22.2637	21.9363	19.3025	21.2074	19.8401	22.6475	21.8625	21.6111	20.7273	22.3179	20.6303	20.1598	20.6345	20.6432	21.7238	20.6347	19.825	21.4352	20.5607	22.0334	19.9844	21.4908	21.6815	21.6371	21.3102	21.4951	19.9067	22.319	21.5901	21.0153	21.2952	21.298	22.0607	21.507	21.7006	21.8214	22.5258	23.2407	21.2623	22.0351	21.857
RSSA	32.0082	32.3157	32.1034	32.0257	32.0062	32.1574	32.1371	32.0647	32.4642	32.669	31.1878	31.3223	31.4858	31.7031	31.6954	31.6305	29.8224	31.3262	30.5003	29.9333	31.5458	31.44	30.0772	30.3661	32.2387	28.7945	30.7775	31.3275	32.0904	31.5301	29.7719	30.9773	30.7988	30.2873	30.5111	30.0041	32.1225	31.557	31.7649	29.6104	31.1184	31.5087	31.7298	31.667	31.6332	31.4904	31.716	31.8772	32.4241
CD63	28.0244	28.1659	31.5651	30.6975	30.8527	30.3657	31.5884	31.1012	24.0427	24.1072	31.5895	27.9842	31.7705	31.3982	31.4851	32.5513	28.9747	22.3143	21.3382	20.2704	28.9768	28.8133	21.1076	20.2617	29.6943	29.0563	27.0513	27.2765	29.7404	29.2625	25.7447	27.6996	27.1325	27.7487	27.9768	27.4951	29.8701	23.9927	30.4285	25.9102	26.7839	28.6833	26.4504	28.5124	27.6936	27.8316	29.1606	27.8182	26.4412
SNRPA	25.5107	25.1195	26.0087	25.4928	25.0064	24.6652	25.5075	21.1708	26.4474	20.4201	21.2482	23.8432	24.1069	24.3737	24.7847	23.8407	20.5032	20.5927	22.3064	22.2095	21.7038	21.7066	20.8721	20.9387	21.6398	21.3057	21.2524	27.6162	26.1841	28.6726	27.1511	26.6534	22.1056	21.2393	21.3144	21.0093	21.7986	27.5165	19.127	21.3238	27.2072	27.2353	27.8616	27.6493	27.7255	27.6649	27.6773	27.6134	27.2504
ENOG	30.7439	31.0687	29.4205	26.4116	29.147	28.2096	28.726	28.3736	31.4001	29.1576	31.4709	30.645	31.4338	31.2953	31.1458	30.9507	31.7055	31.5788	31.0179	31.6898	31.3091	29.9002	31.9059	31.8387	31.9303	32.9079	32.0218	32.3455	30.1483	30.5353	32.4194	31.2934	31.8709	28.9302	31.5048	30.1209	30.9406	30.602	31.266	30.8823	33.0482	33.0386	31.8234	31.9819	32.5144	32.4076	32.4596	32.4464	32.9895
SRP19	23.567	21.8768	24.8216	22.7487	23.8322	23.5041	23.5407	21.5132	24.6085	23.9928	21.0727	25.8109	19.8725	21.3829	25.4731	23.6158	21.2103	24.6419	19.3971	20.721	20.9423	20.7581	24.0272	21.1947	24.0471	23.6637	25.1787	27.7693	24.0021	24.947	26.3958	22.1485	21.6497	26.4886	23.3346	26.3852	25.426	26.5231	24.6465	23.5345	22.5225	21.3484	21.4293	22.7775	21.9745	21.8173	20.8687	22.587	21.6063
DOPO	21.6692	20.0233	21.2822	19.9765	19.5504	19.8876	21.4966	21.2139	21.1676	21.8651	20.272	20.6544	20.0381	20.118	20.4656	21.6445	20.1612	22.329	21.2825	21.6522	20.721	20.7118	20.3424	18.9046	21.4656	20.2234	23.9215	24.0998	19.5623	21.7678	22.6969	20.3278	21.7233	23.3944	20.0938	21.4277	22.3354	21.0087	20.6828	22.4629	26.6063	26.5962	29.1504	28.5717	27.5082	27.1241	29.9286	29.4202	20.6565
GSTP1	31.7988	32.1199	33.1423	31.2905	32.8391	32.9587	31.6399	31.7245	31.5634	31.7918	32.4526	30.5332	32.4008	32.2982	32.4932	30.7613	29.5396	29.8217	29.2646	29.2152	30.0005	28.9885	28.4949	28.379	31.4835	30.6267	31.9523	30.9254	31.3236	30.7213	30.7326	31.0885	31.9528	31.0881	31.5278	30.0212	32.0899	31.1992	31.8765	30.931	30.9482	31.4696	32.2077	32.1007	32.0691	32.3509	31.9124	32.1856	30.7731
RU1C	21.0574	22.0624	19.7327	21.0998	21.019	21.1469	19.2749	20.0865	21.211	21.9238	22.4946	23.3233	21.4242	21.5718	19.2291	21.9785	24.9827	25.8882	21.0336	20.2959	20.2985	20.9493	21.0165	21.4545	21.6372	19.931	22.0633	20.3463	21.6051	25.1939	20.8883	20.1431	19.8817	21.6138	23.2093	22.4487	24.7846	25.3308	25.0895	25.2959	24.1528	25.3691	25.9132	24.2775	25.1865	25.3274	25.3746	26.0645	21.0609
DHPR	28.6789	28.3255	28.8691	28.13	28.2976	27.7707	28.9132	28.1621	28.1089	28.7399	30.3232	29.6215	29.6681	28.9849	30.5542	28.4145	28.771	28.6546	28.9763	28.7067	27.9152	27.792	28.728	28.7948	28.1778	28.8399	29.8278	28.4225	29.0253	27.7756	30.7587	30.6126	30.3878	29.0529	29.9399	28.3739	29.8432	27.8664	29.2671	28.1456	31.0996	31.4187	30.5083	30.4508	30.5494	30.45	31.526	31.2758	30.7621
RET1	21.5456	22.04	19.7461	23.4022	25.8127	23.9525	20.9617	22.6456	24.6687	25.3673	27.9326	27.465	29.0966	26.4684	27.3979	26.0396	21.2299	21.9555	20.5045	22.8965	22.9323	22.0694	21.1545	20.7729	26.9445	23.9893	20.1023	22.4391	25.7807	23.2016	20.8882	21.0077	22.0944	22.5663	20.4148	20.4911	24.3743	24.4261	25.8523	22.2495	31.0119	31.3367	30.5377	30.1305	29.2364	29.3833	26.6808	27.5844	27.9183
F16P1	23.0139	23.7981	23.487	24.0492	22.9438	22.9296	22.5722	22.3664	21.9167	22.7392	21.056	23.2812	21.3604	21.0504	22.4257	23.8848	24.2164	23.8102	24.9613	23.7042	22.2806	22.8067	27.7009	27.5486	24.5711	22.8091	25.5481	24.9867	24.3907	24.6942	22.6372	24.6587	25.1959	23.5768	25.1478	24.3523	22.0665	23.4454	21.5733	23.3873	26.3903	27.2439	26.5776	27.0753	27.2971	26.5166	27.5407	27.8132	25.3864
GNAO	24.4803	24.804	22.1941	20.5116	20.0993	23.9105	23.7004	23.4983	22.6169	22.0061	22.6448	22.6426	23.8353	23.0866	22.8746	23.3643	27.4404	27.495	27.0786	28.4101	26.5481	20.8535	28.7858	29.0887	28.3396	27.4982	30.1524	30.2037	28.2901	24.977	26.43	29.9574	31.3421	28.1736	30.1751	26.1456	29.5489	22.0034	28.1207	25.4743	32.0545	32.3654	29.6958	30.0355	30.1051	30.1409	31.2936	31.2089	31.2238
SPRC	30.6675	30.7217	32.6865	32.5381	32.9424	32.983	31.9399	31.3187	30.5909	29.4012	31.0515	31.2791	31.2091	30.686	30.9119	30.7709	30.4385	29.7593	28.2445	28.2295	30.0157	29.7429	29.8362	29.2254	30.0938	29.7816	31.6356	31.3284	30.8756	30.9494	29.8646	29.9174	29.7142	28.9715	29.8617	29.6944	31.0151	30.8367	31.2257	30.6058	29.4533	28.8823	27.6535	28.3864	28.4116	28.9231	27.3013	27.6244	27.8057
GSTM1	25.6489	25.5261	23.8305	22.7995	25.4614	24.9272	26.2963	25.1795	20.2772	21.1777	23.3639	22.2888	22.5553	23.7403	27.3599	25.1645	22.1765	22.8835	20.863	21.4202	20.1245	20.3089	21.4231	20.0148	22.998	23.2239	28.1303	27.1466	25.0501	26.7214	25.4748	27.5377	29.1002	25.647	28.473	26.98	28.3622	24.8944	27.6672	27.0074	26.9456	27.0152	20.5973	23.063	21.3497	25.4596	22.0037	20.5235	22.1928
CLCA	28.2648	28.1623	28.5088	26.2571	28.9964	27.3877	30.7813	27.0311	29.5197	26.0091	29.3637	27.9634	28.8916	27.5139	28.3725	26.229	27.6503	25.26	26.724	26.9334	28.9087	29.5226	27.3267	29.1934	21.6646	23.253	21.0931	20.8644	19.6257	19.8677	21.4372	19.3088	28.1114	22.4563	20.8511	20.904	27.8994	28.6268	20.5494	24.4849	26.5241	28.6418	28.0646	28.2393	28.3906	27.8335	27.5481	27.2022	26.1081
CLCB	28.9298	28.7712	28.2718	19.8326	28.0006	24.2142	24.2708	25.2001	26.5161	27.8315	28.5602	23.0512	24.8291	21.4009	27.251	22.4263	28.7677	27.5227	25.0827	28.4643	28.9758	28.7773	29.0875	29.0653	20.9352	24.9916	26.342	25.8277	26.6469	25.8249	25.4166	26.567	27.679	25.2766	25.1973	22.1146	26.5383	25.4387	25.8825	26.1598	28.9479	28.933	28.521	28.4751	28.4873	28.4762	28.1139	27.8704	29.2993
CN37	29.9261	29.885	30.2047	28.0994	30.2791	28.8062	28.9103	27.794	28.1383	31.254	32.0613	29.8091	32.2102	30.7825	32.1077	29.9456	33.3262	33.1963	33.3577	33.8607	32.2179	32.6816	34.3529	34.1741	34.6224	32.3112	34.8271	33.1009	34.226	32.4688	32.738	35.7465	34.9408	31.1976	34.8969	33.5549	34.0892	31.3933	34.2083	32.3625	32.3542	32.1025	32.1458	31.9124	33.195	32.9193	31.8231	31.8262	31.8816
CATH	24.8207	24.6357	23.7289	22.7	27.2619	24.8948	23.8197	21.2652	25.0311	25.2466	23.837	23.6096	27.2273	26.1013	27.3389	26.7019	20.238	20.2214	25.8176	20.2038	21.714	25.2557	20.5265	21.2868	21.2886	23.7051	20.9433	20.5955	24.0369	19.9258	22.5963	20.8244	23.7281	21.8818	24.9915	19.8488	21.3756	20.2808	23.9325	19.9171	20.8133	23.5025	26.8971	27.1702	27.1084	27.294	27.0175	26.6373	25.4462
COX6C	26.7309	25.2935	24.0264	21.1165	20.2924	21.326	27.8815	21.0437	21.246	24.483	26.1206	28.124	23.2648	25.0103	27.14	28.1926	22.7779	21.3969	20.944	21.2909	19.9449	21.7168	21.1474	21.0339	27.818	21.5584	19.6908	22.03	26.9805	22.5645	20.5126	21.4412	27.0961	26.4648	27.4301	27.4647	22.3363	21.5465	26.9662	20.3921	27.8146	27.8118	27.4972	27.2838	26.8406	26.8532	27.9467	27.922	27.8086
TACD2	19.6417	20.2814	24.5391	24.1536	23.3985	21.1102	22.3962	20.3542	21.054	20.4496	21.732	23.8922	21.1578	20.4894	20.2923	22.1249	27.0419	28.3657	25.0323	20.4526	25.7212	25.8661	24.6524	24.7876	28.2152	27.9998	29.006	28.3814	28.0504	27.3269	27.6328	28.5757	26.7191	26.6956	25.8294	25.253	28.279	28.4476	28.9783	28.1941	21.8337	21.3773	21.2672	20.8233	23.1677	23.8538	20.785	20.5462	23.045
C1S	23.49	24.1642	25.6985	25.3818	23.477	23.022	24.8972	24.3521	25.9112	21.4017	20.1139	22.5898	25.3645	24.9129	23.651	24.1073	20.5841	25.4648	26.2666	24.7468	19.813	19.9573	26.1778	26.5935	21.7203	21.3724	26.4319	24.5001	20.3447	24.0033	26.9672	26.4566	27.0376	23.9453	26.7941	20.0231	23.7084	24.6713	21.3249	19.4432	27.8783	28.3324	25.6882	25.6247	27.7338	28.0681	26.6585	26.9107	26.1647
PARP1	28.9594	28.6454	26.4546	26.2665	26.2895	24.7562	24.8572	24.5273	29.411	28.751	28.7871	27.2263	28.8439	28.0009	27.1968	27.779	28.2035	28.944	28.5481	28.0154	28.4958	27.3864	28.854	27.4443	30.833	29.3253	29.8786	28.9991	29.7567	29.3857	28.9077	29.9212	30.0771	29.0344	29.434	28.331	30.2749	29.2658	30.1957	29.8391	30.3426	30.0888	30.869	30.4223	30.7342	30.7289	31.3489	31.2459	31.0036
IFIT1	21.9644	26.0327	26.4842	25.9099	26.0814	25.6672	27.0963	27.1133	23.6765	25.8464	27.3135	26.7704	29.2799	28.2999	29.6502	28.3243	25.7888	25.2192	24.1528	25.6464	20.6077	26.5356	24.7658	25.5884	24.8783	23.4089	26.7764	26.3471	24.817	23.7607	24.088	24.4669	27.9132	25.8017	27.5799	27.1094	29.6349	27.7243	27.7876	26.8261	29.337	29.2836	29.742	29.5527	28.3538	28.3514	27.4581	28.2047	27.9466
LOX5	21.5894	20.8259	23.3141	23.5036	22.595	22.3448	21.7103	20.1904	22.4261	20.5078	20.5551	21.6087	20.4917	20.8424	21.4354	20.6817	20.2289	19.9384	21.5028	22.0806	19.6034	19.8558	20.5514	21.9753	19.9366	21.969	19.3524	22.5151	22.0677	20.5848	20.292	20.6208	21.2535	21.7119	21.4325	21.7684	20.1464	22.194	21.1915	20.4704	20.8211	22.9697	24.9395	23.9612	21.2251	23.778	25.9252	25.8915	21.3141
LKHA4	30.2182	29.2833	30.2763	29.4345	30.3203	29.622	29.8035	28.8166	29.1354	28.0891	29.5811	28.0252	30.2262	29.084	29.7912	28.3254	27.6664	27.5738	24.9759	21.313	20.9316	25.142	24.1486	20.1624	28.1316	26.3949	29.1844	26.2549	27.5741	24.2565	27.5094	27.9506	29.1622	27.3567	23.7843	25.454	28.21	28.2509	27.8289	27.4046	30.0397	29.9632	30.782	30.362	30.3091	30.455	30.9108	30.9557	29.7659
CO4A	23.8341	20.3099	21.9791	21.3098	21.4634	19.6721	20.2794	21.2072	23.8862	20.6453	20.1391	20.7582	21.0685	21.7932	20.3336	21.213	23.594	23.2172	25.0381	25.5404	20.8974	19.8962	24.2823	24.7854	20.4843	23.8589	24.4708	23.2116	21.1278	21.444	20.8027	21.2376	24.6005	25.3627	21.1634	20.9478	24.6569	25.1279	22.6232	23.4654	23.5397	24.4016	24.6829	24.9337	25.325	25.2624	26.6031	26.6501	24.6744
CO4B	23.0661	22.1642	18.6394	20.3079	19.0124	20.7207	24.9948	20.3337	22.2815	22.398	19.8621	20.5325	25.1249	21.7523	20.1542	19.1861	26.7871	26.8903	31.6093	30.8471	25.7417	25.8488	28.2863	28.504	23.271	23.5878	29.6296	28.901	24.9349	21.9338	25.1151	26.5551	29.9575	25.2422	27.8376	26.6414	26.7349	26.2651	26.8192	22.4832	32.1074	31.8977	28.5218	29.0356	32.059	32.2981	32.2795	32.1736	32.1098
JMJD7	20.8098	20.5923	23.3797	21.6924	20.8245	21.3867	19.5073	20.197	22.0332	21.0782	23.9223	21.66	24.0166	23.826	23.7949	23.9641	25.3536	20.7036	21.8486	21.4388	21.0303	20.6165	21.3626	22.0811	19.9451	21.2852	20.8232	22.5093	20.9827	22.164	21.6439	20.3152	19.7541	21.0842	20.9809	22.3073	19.7045	23.1322	23.8805	21.4152	23.8697	23.815	23.0558	22.8617	22.4863	22.9302	22.729	23.2626	23.9639
GSTT2	21.8336	21.9719	24.403	23.544	26.1353	23.1155	20.6712	20.621	24.6929	25.1259	25.6415	23.7669	26.0976	24.6438	22.2274	24.7931	20.9227	20.6846	20.8208	19.765	20.7675	20.9387	20.4615	18.9641	23.7417	26.0973	21.3346	26.0807	23.403	21.3316	23.1623	26.2569	21.9524	23.763	21.1466	22.0255	20.6115	22.606	23.2717	23.032	21.805	22.1183	24.5711	20.8372	26.8386	26.9129	26.8474	26.4512	25.1489
SAA1	20.8772	20.0005	21.196	22.4446	19.6427	20.5964	21.5365	21.6061	23.7676	21.1489	20.5593	19.5275	21.6093	21.8461	20.371	21.741	20.5746	20.7837	29.2064	29.4328	19.8574	21.8843	25.0164	28.0895	20.2557	22.6452	23.8982	23.855	21.7264	21.4292	24.4161	19.8831	21.894	23.1878	20.0065	22.329	19.6205	21.3787	20.6646	20.6099	20.3556	21.4201	19.1147	21.1555	21.4975	20.7494	22.4984	23.044	21.9673
ADX	20.9527	20.1679	20.1281	19.3947	20.3355	24.8132	20.6839	21.0826	22.5633	24.9276	20.3299	23.1735	22.0031	20.8697	22.0949	21.9939	22.3006	21.3271	20.3058	18.9183	22.7634	21.5081	20.5746	20.8389	20.0359	23.2076	20.7858	22.1597	23.8454	21.2381	22.2627	21.0656	20.7131	21.2088	20.379	21.0244	21.0786	22.3474	23.0759	20.9673	24.239	25.0027	25.1384	25.0131	24.9341	23.0785	24.8228	24.2751	26.3555
RAP2A	22.0194	26.8641	22.898	23.8824	22.1723	23.4205	25.2775	25.6791	26.7662	26.1593	24.059	25.4566	25.1262	25.5132	21.2557	23.5759	23.9965	22.0249	23.3222	23.2488	20.4775	19.5394	20.0332	23.6187	28.5466	25.1197	26.2189	25.6481	23.6041	25.1912	27.0492	25.5827	26.2969	21.8778	26.1155	24.9981	24.0071	25.1236	24.129	23.274	25.7564	25.0161	24.9152	26.0194	27.7581	25.8812	26.4319	26.8241	24.8984
RO60	27.3464	27.2528	29.0905	28.7584	29.3343	28.5759	28.8384	26.5544	29.3691	29.4575	29.0062	28.8516	29.4877	29.4517	29.8785	28.4488	27.8077	28.0005	27.7073	27.1592	26.118	26.3832	27.5887	26.6585	30.3087	30.0729	27.572	28.8445	29.3857	26.4965	27.8075	27.9611	28.6949	28.5703	27.9776	27.716	28.9743	27.8168	28.9304	28.5574	28.9378	28.9294	29.0784	29.2277	29.0638	28.9288	28.9104	29.1494	28.2196
LYAG	24.5986	23.0352	28.3396	26.1059	28.5916	26.7195	26.52	24.8997	27.6919	28.5992	29.0441	26.4607	29.7034	27.4091	31.8035	28.6778	23.9403	23.8124	23.8067	22.2976	19.5212	20.0535	23.6138	21.6398	23.5956	21.5802	21.2882	20.5284	25.8304	24.2921	22.2059	20.5455	22.7894	23.9608	24.8	23.2651	26.5835	25.074	25.6639	23.2165	27.024	27.0605	26.4524	26.0968	27.9487	27.8133	29.2773	29.225	27.4867
1C07	20.74	20.8217	25.0675	25.864	23.1743	25.0684	19.9477	20.991	25.0011	23.5958	23.7272	24.7242	25.7715	24.8921	23.2593	24.3928	21.9293	20.4463	20.9684	20.7578	21.1797	20.2473	20.7439	21.566	23.8327	23.8512	23.1362	24.2217	23.6657	25.9058	20.6512	25.7033	24.2954	24.7657	22.6851	21.4106	23.5849	24.239	23.2763	22.6799	23.7503	23.0366	20.4234	25.5077	25.274	24.6182	26.6312	26.5861	27.2979
H14	31.2148	30.9898	25.7668	25.3461	25.0863	21.947	18.8348	24.675	24.1818	25.9396	26.6175	25.3719	29.7311	27.5767	27.9786	25.3113	34.2298	33.4911	33.8996	33.5731	34.4553	34.6138	34.6559	34.2767	31.6626	27.7593	31.2724	28.8838	31.948	29.7095	28.8806	31.045	33.3036	30.2605	30.4536	30.5279	29.9668	28.3443	31.711	29.3953	33.0559	33.2839	34.3105	34.1686	32.7527	32.1826	34.0933	34.1902	33.7397
OSTP	20.6763	18.8531	21.5898	21.4865	22.0751	21.1072	21.199	20.6869	23.9482	21.255	23.5691	23.9577	23.3915	20.7107	21.0885	23.6992	24.1554	23.4404	21.104	20.7755	20.6341	19.8703	20.6688	20.5731	21.8539	20.0486	21.5027	21.7248	21.5246	21.8512	20.6127	20.8798	22.396	21.7696	20.3793	20.6479	22.2541	20.8604	20.2764	19.7237	24.77	24.9074	22.5264	23.2756	24.0884	24.2806	20.4137	22.6896	25.1055
ODP2	28.4657	27.2255	28.4341	27.575	28.6692	27.0676	28.0886	27.4788	23.892	26.7605	29.161	27.6875	29.7739	27.5069	29.0715	25.405	26.8656	25.7797	25.9041	25.7704	26.5559	24.9615	25.1802	25.4161	28.5113	27.4501	29.0576	27.7316	29.2834	27.4245	28.6348	28.5946	28.6742	26.1137	27.706	24.9954	28.2022	27.5598	28.6578	27.8614	30.0664	30.1815	29.11	29.379	29.9818	30.2866	30.4749	30.6005	31.4028
COT1	22.8013	25.3718	24.6107	24.9854	23.8786	23.9562	20.6331	21.7682	24.3558	24.9181	19.773	23.7005	20.748	24.3214	23.7024	21.8847	21.6323	20.0901	20.3807	21.5741	21.1002	19.5359	21.2264	20.1029	21.394	22.1521	23.8858	24.6709	20.1729	24.571	21.659	24.2183	25.0561	22.8106	21.0327	22.5331	24.0162	25.3899	20.8789	24.6854	24.7606	25.3519	26.1949	26.2725	25.6783	25.7543	25.1368	24.669	24.7769
COX5B	29.4807	29.3523	29.6554	28.0363	29.2596	28.2529	28.4619	29.0756	27.9588	29.1094	28.4931	27.9286	29.097	28.3995	29.0773	27.9614	28.3333	27.3607	27.5988	27.293	29.4966	28.2889	28.7921	27.1092	26.5743	27.1787	28.1349	27.2138	28.9537	26.8293	28.7442	29.0714	29.1558	28.736	27.8119	28.5769	28.4527	28.4796	29.1119	28.1002	30.1235	29.844	30.1001	29.5653	29.5965	29.7101	29.8305	29.9889	30.948
PPGB	28.5367	28.5139	27.9775	28.3256	28.347	28.6031	28.012	27.7966	29.2623	25.7167	30.6083	26.7032	30.323	29.2066	30.8935	26.8069	24.8694	27.3369	20.4868	20.1818	27.0123	27.7718	21.4382	19.9218	27.2333	27.7266	20.1075	24.8768	27.5559	28.7602	24.7563	18.4242	21.4718	25.7762	23.3503	24.7262	29.0058	28.2698	28.6174	27.7077	21.1369	25.6353	24.7271	26.5662	25.1055	25.0546	25.8182	26.2044	26.7123
TAU	21.4139	20.9923	18.891	20.0622	18.6204	21.1291	21.6542	21.6756	20.5602	18.575	22.9287	22.1802	19.2503	20.6051	20.0473	22.4826	24.192	27.8169	27.7813	28.1573	22.4286	19.7527	27.5023	26.44	22.2307	20.1874	29.8293	26.5923	24.9331	22.7511	26.4701	29.5047	29.6058	26.3445	27.8255	25.9865	24.7694	23.3158	26.4627	23.8297	33.3825	33.2131	32.4495	32.4991	32.2763	32.1565	31.8226	31.908	33.4004
CO7	20.6119	21.9513	23.6313	19.8431	20.722	22.3936	21.0116	21.7136	23.0288	20.6439	24.7575	24.5868	21.1181	21.0064	20.8425	21.7058	21.374	25.7959	25.2675	25.6146	20.5843	20.6428	24.3594	23.8566	21.5801	24.0357	23.1751	24.0712	22.4845	21.0296	23.5429	23.0936	23.7919	24.4081	23.252	22.3875	19.6004	23.0169	20.4437	22.3951	28.5328	28.9641	27.1215	26.7646	27.2325	27.7033	27.1857	27.4396	26.3856
KAP0	30.285	30.6408	29.4914	28.8737	30.1752	29.191	30.3539	30.3315	28.3845	29.4185	30.7053	29.5748	30.4395	30.0603	30.4631	29.822	29.9097	30.1756	29.9083	29.4965	30.3385	29.9528	30.1967	30.9258	29.7545	28.9439	29.6978	29.3267	29.129	28.6385	29.9324	30.5685	31.5512	30.4794	31.1393	30.1988	30.7798	29.9387	30.2599	29.8429	31.7045	31.6923	31.1124	31.3479	31.3944	31.6628	30.8943	31.087	30.9371
CH60	32.6177	32.4681	33.0226	32.3362	32.4179	32.415	32.6421	32.3407	31.1746	30.1817	33.2602	32.1265	32.8827	32.8103	32.8735	31.378	31.6221	32.0319	29.8335	31.3267	31.0657	31.1645	31.3833	30.772	32.1829	32.4811	32.068	32.3669	32.1522	32.0022	31.2271	31.8144	32.1328	31.4296	31.602	30.3373	32.7967	32.8863	32.6896	32.7878	33.2232	33.1299	32.4178	32.4686	32.5094	32.4823	32.7982	32.9367	33.537
GRP78	34.9818	35.0374	35.1502	33.7888	35.199	34.991	34.9795	34.5712	33.5179	33.784	34.4612	32.9782	34.3526	34.5531	34.1642	32.5436	33.5005	33.521	31.7304	31.7371	32.9419	33.2656	32.1222	31.9221	33.033	32.2038	32.1265	32.1052	34.0003	34.0104	32.0187	32.3151	32.5206	32.9733	31.5275	30.7408	33.8094	31.8152	33.8519	33.3715	33.9383	33.9184	34.034	33.9519	33.854	33.8543	34.2223	34.1087	34.4449
PPAL	26.0056	21.8397	26.8764	26.1949	28.1957	24.6623	26.5858	22.4009	22.4796	25.5912	27.9572	26.0854	28.9107	26.5875	29.0044	25.9357	20.666	24.8569	23.216	20.2056	23.4966	24.5208	23.6215	19.6708	25.5442	20.3645	21.2713	22.5386	25.6392	22.4652	20.7238	20.2785	19.6087	24.1483	19.0529	19.8124	22.9831	24.2229	26.1532	20.0225	19.9902	24.9157	21.5408	21.3185	24.399	24.5147	25.4303	25.1881	26.9094
MTAP2	20.7716	21.195	19.2367	20.176	20.4486	21.321	20.7089	20.0738	21.4911	21.8031	22.7387	23.1591	21.2456	21.4476	21.4813	22.715	18.6034	21.6484	22.0166	19.6441	20.9753	21.7557	23.1196	22.5428	19.2952	18.754	24.3171	25.5241	18.6392	20.3561	24.5833	23.227	26.3708	24.4544	27.0375	24.617	26.2102	20.9881	23.9739	22.1041	31.1259	30.714	25.5303	22.276	31.5661	31.3471	32.7213	32.6253	33.3452
HSP7C	35.6938	35.7295	35.6477	35.3548	35.3445	35.0525	35.6131	35.4337	35.4849	32.6168	35.3893	34.8258	35.4477	35.0864	35.3127	34.7626	34.4391	34.397	33.3388	33.5851	34.1833	33.9725	33.9587	33.7851	34.0859	34.2057	34.7951	34.4842	35.0991	35.0549	34.5773	34.6338	34.7108	34.5148	34.2278	33.9364	35.1471	35.0508	34.8785	35.1808	35.0049	35.0522	34.8962	34.8471	35.0701	35.1237	35.146	35.2836	35.4986
GTR1	27.1731	26.8303	30.6053	25.6893	29.1868	28.7658	29.3977	28.4014	27.0557	26.8865	24.7677	26.3313	26.6196	26.1703	22.9576	26.4563	28.315	27.8143	28.0646	29.6134	25.7342	24.503	27.5985	28.3099	31.0444	31.2318	32.9551	33.1662	31.7933	31.6639	30.1056	31.4199	31.4564	28.2768	29.6146	25.6285	30.0772	29.1212	29.0924	29.3857	27.2912	27.9926	27.3403	27.1984	28.5252	28.6153	27.3393	26.8363	25.3348
UMPS	27.5818	27.4083	28.4145	27.3836	28.8217	27.7142	25.8608	25.3827	25.5314	23.8793	28.0951	27.1667	28.8169	28.1322	28.3351	26.0988	23.7623	25.459	23.8836	23.6511	22.303	24.6631	23.7689	24.7189	27.1954	27.902	22.5823	28.8263	26.6827	27.7484	25.1765	23.6798	25.7168	27.5967	24.2731	27.6163	26.1004	27.4264	25.0349	27.1711	26.4096	27.0954	27.4849	26.8506	27.2433	26.6818	27.6676	26.7823	25.5867
ODPB	28.8144	29.1961	30.2208	29.3793	29.537	28.9695	29.8657	29.4242	29.8583	29.1108	30.2408	29.3013	30.0537	26.9732	30.0691	30.1928	29.0479	29.1395	28.9497	29.4337	29.3102	29.557	29.5795	29.7575	27.0487	30.0526	29.5632	28.4904	29.3965	27.8345	28.5235	29.7394	29.9415	27.1337	30.3297	29.2618	29.8812	27.8677	29.9604	26.3872	30.4563	30.3467	29.8867	29.7202	30.1027	30.1765	30.8058	30.8297	31.8227
ODB2	21.6954	24.1212	24.0851	23.9511	23.8178	23.8472	24.0624	23.6989	25.7241	25.8046	25.3601	25.4359	24.7658	24.7713	24.4734	24.7629	25.6494	20.5238	23.4672	24.1888	22.186	25.4084	24.9508	24.3126	27.0728	26.173	26.7155	26.6589	26.243	25.6518	25.9686	27.6427	26.7808	23.7884	25.9601	27.2695	25.9875	26.526	26.6399	27.0111	28.1478	27.672	27.5062	27.182	28.0656	28.5396	27.9569	28.7938	29.2319
ITAM	21.0345	19.8271	27.3866	21.097	27.811	20.1163	27.1674	21.0453	21.7803	20.4349	23.257	21.1225	21.8177	20.9029	20.7181	23.3769	25.4373	24.0828	20.5137	20.2884	20.3476	25.4633	22.4698	19.3793	18.5598	24.1988	21.752	21.4374	21.9898	22.546	20.5309	22.643	23.6714	20.0704	22.4285	20.6381	23.4574	22.2499	20.8266	21.1162	26.7705	27.0474	26.0479	26.8701	27.025	27.2131	26.3758	27.4884	23.5716
PYGM	24.422	22.9023	24.4887	24.6293	24.7819	22.4959	24.901	21.3678	21.8407	23.69	24.3783	22.7272	20.1336	22.4088	21.7587	22.3318	23.7887	23.68	21.5803	23.1514	22.5792	22.4882	22.0552	21.9653	25.1435	21.2022	22.1314	20.4188	24.2034	20.8714	23.2957	23.1499	21.5994	22.9675	20.5543	23.2113	19.9086	23.5142	22.3013	24.0299	21.7917	21.7498	27.7433	27.631	28.3229	27.6247	26.5808	26.0186	24.6024
RALB	19.9541	20.8804	27.9266	27.0319	27.5799	25.4991	26.807	27.8579	27.1923	27.0413	28.4239	23.0388	27.3058	26.6139	26.8234	28.1598	20.9422	20.6222	24.8264	27.0177	21.2161	23.9797	20.3557	20.7621	29.835	27.0707	28.9479	26.4985	27.1725	27.9809	25.7917	27.9424	28.928	24.8819	29.437	25.5463	28.1215	23.351	29.4883	25.9114	28.243	28.3834	28.0501	28.2	29.4851	29.0934	29.3479	28.5993	26.9649
BCR	23.6249	21.4987	24.3723	25.1014	22.6509	22.1559	20.7375	24.788	24.1932	21.2423	22.9628	23.7057	24.4933	22.3412	23.6704	20.5487	25.3364	20.5716	20.4229	20.8743	19.8657	22.2384	21.483	20.7265	21.0902	25.7575	25.4636	24.7273	23.531	24.6301	24.7846	23.7312	23.6532	24.5054	22.9232	23.342	23.0646	24.0837	23.1155	23.9471	24.9661	24.3572	25.2295	24.6173	24.4937	24.7276	25.1065	25.0038	23.9493
SPTB1	21.5581	26.1332	22.7402	23.4349	21.6976	22.6216	21.7087	21.44	21.5475	23.6535	25.556	24.2464	22.4645	23.1568	24.177	26.4937	21.9738	27.7365	24.1914	22.8926	22.1981	23.749	25.9102	26.8198	20.5546	25.369	24.6643	23.9985	21.0573	22.537	26.192	25.2918	24.8972	25.2549	22.1166	23.4244	25.5659	25.0743	23.7096	24.1497	26.4453	26.563	25.7091	25.9322	27.714	26.0549	26.0577	25.0567	25.6251
LAMP1	30.2471	30.3505	31.7305	30.7201	32.1597	30.9655	30.7963	25.568	27.7482	21.5331	30.9137	28.1779	32.5189	29.4122	32.5564	29.0762	30.0252	29.8489	26.6224	22.9364	30.2634	30.4341	25.5605	27.7997	30.1556	27.4684	28.8627	28.5617	30.6276	30.1277	27.0621	28.5449	25.6703	24.163	29.1235	28.0549	30.3428	30.1151	30.4283	29.427	26.1403	26.0177	22.3557	21.9695	26.4187	26.0915	25.7096	25.5704	28.3427
TOP1	23.2911	22.2452	21.5055	22.4042	20.7251	22.1335	21.9341	21.86	21.7989	20.4222	18.9181	24.8126	24.0717	22.7014	19.2864	23.1407	24.565	24.7716	20.6616	19.5004	20.1392	24.7311	19.6463	23.5388	27.3264	26.397	24.8675	24.5482	26.2828	23.4127	21.0552	24.3912	22.2472	24.1861	20.9962	20.9725	25.7472	25.6875	26.3965	25.6354	23.7851	25.3694	26.6371	24.331	24.0172	23.0576	25.3174	24.2004	25.3606
UBL4A	24.7264	25.889	24.4694	24.6695	24.8324	25.5683	23.7189	25.0744	26.008	24.6228	24.7044	25.8774	25.397	25.9115	23.976	25.4306	25.1916	24.2391	24.1487	21.3837	24.3746	24.9474	25.0948	24.492	22.5012	23.906	20.8614	23.9753	23.1308	23.6235	25.4365	24.9278	23.8853	21.5458	21.4388	20.4657	25.8042	25.4009	19.8053	21.564	26.3635	26.4212	25.8566	26.3457	25.8499	26.519	25.6741	25.649	25.6085
MPRI	30.2264	30.3936	31.0792	29.9031	30.6583	29.3732	30.1945	29.2988	28.5084	28.2775	31.0296	29.8444	30.5569	29.0634	30.5952	29.6736	26.8662	27.631	27.9251	24.905	28.6051	26.5108	28.1658	23.9612	27.5414	27.4743	23.6877	23.3531	28.9873	27.7052	23.7715	20.5478	24.5361	25.6679	23.0331	24.0558	29.1276	27.0912	29.0642	28.7585	27.8189	27.6271	26.3497	26.4728	27.192	27.3545	26.7004	28.2659	29.4107
PRPS2	26.4502	26.4575	25.3635	25.4908	25.3506	25.7333	26.0116	26.3944	25.7257	22.6581	26.336	26.9662	26.5961	26.07	26.0238	27.4916	25.9184	25.7114	20.002	24.9813	27.085	27.43	21.3627	25.2891	26.2648	26.5376	25.6763	22.1237	26.6421	25.3787	25.1885	19.2944	25.152	24.9606	25.2219	25.3191	26.1201	26.1967	25.1433	25.5151	26.2687	26.354	26.2107	26.2718	26.5055	26.5224	26.5501	26.9586	25.8927
PCNA	30.1084	30.2395	27.4344	27.1985	28.5366	28.5093	29.047	29.1445	27.3525	27.9278	29.5015	29.3088	29.254	29.4758	29.5181	29.72	26.2245	28.0482	28.0648	22.2009	27.6296	26.9641	22.3805	24.3701	29.9119	29.5032	20.9135	24.5819	29.4027	29.817	22.8702	25.2264	25.8619	25.0838	24.9356	26.2715	28.6846	29.3776	28.675	27.9606	27.7148	27.699	28.1481	27.9203	27.3001	27.2316	27.4706	27.2514	27.3207
SYHC	30.4715	30.4019	30.8083	30.0738	30.1	30.1609	30.5091	30.1585	30.3774	28.9581	30.2955	29.1831	30.049	27.7303	30.027	29.5567	29.5038	29.2967	26.7796	26.8022	29.3391	29.9001	28.5132	29.1054	30.4292	30.1292	28.9843	27.4354	30.3532	30.3156	28.5805	29.1529	29.5482	29.0677	29.5853	29.6109	30.1594	29.6315	30.1314	29.7317	29.962	30.1509	29.7173	29.7628	29.9148	29.9985	29.9328	29.8908	30.5884
CO6A3	30.8269	31.0143	31.6975	30.8739	32.7954	32.6063	32.3946	32.0358	29.978	30.0913	25.9246	28.8187	30.94	30.133	31.2869	30.8827	36.7931	36.7392	36.4663	36.429	36.3084	36.3921	36.5366	36.7998	35.6148	35.1854	36.2865	36.131	35.8599	35.3481	36.2206	36.553	37.3137	36.8373	37.3771	36.9886	36.6325	35.3704	36.6655	36.5885	37.0189	37.0283	38.0853	38.006	37.4014	37.4229	37.6927	37.6532	37.0538
TPR	26.6553	27.4194	26.7743	26.5207	24.5487	25.2532	24.9761	25.4148	27.0224	27.3319	27.4224	25.118	26.5911	24.7193	26.4715	25.1574	25.2741	23.7983	23.1812	27.648	27.0327	26.0019	23.7243	24.8675	25.0827	26.3211	28.1021	24.4413	29.0723	29.4162	25.2305	27.5979	28.0059	27.5958	28.3814	25.2056	29.9394	26.6966	29.4408	25.5882	28.2415	27.3438	28.971	29.6079	28.416	28.8563	29.7302	29.4727	29.2884
FCGR1	20.2903	20.7685	20.3999	21.9849	21.8514	21.1532	20.0252	21.2923	22.4877	21.8409	23.8837	21.1842	18.8317	21.082	20.1123	21.8744	20.3179	19.3281	20.6267	21.2181	20.4954	21.3175	20.2253	20.0384	20.4735	20.9135	19.9132	21.312	21.3953	20.2023	21.8385	20.8699	20.5965	22.7823	22.2127	20.876	19.6874	21.0708	20.45	21.1142	26.1782	26.2444	25.9297	25.3075	26.4928	26.4996	26.3475	25.9867	25.4406
ANXA3	25.2615	26.5736	31.9256	30.7641	30.4216	28.1582	28.9495	28.4819	26.9395	27.8035	29.6302	27.1486	29.0352	27.1715	29.288	27.2851	28.9787	29.7253	29.0472	29.3633	29.1798	29.7087	30.5272	30.9268	30.6861	28.816	33.1625	32.0758	31.4805	29.7962	30.2662	33.1843	32.7412	28.6096	31.7697	29.9769	31.4964	28.0829	31.954	29.8956	30.5831	29.8111	29.1131	28.9973	29.2894	29.2227	28.571	28.3106	29.6047
KCRU	22.3218	19.9548	22.5391	20.5871	20.9716	20.8061	22.6985	21.6786	23.6482	23.332	19.3625	21.5324	20.8001	22.7282	21.7986	21.507	25.1757	25.0958	26.0723	26.9371	26.0983	25.0309	26.3177	27.3908	27.7423	27.0097	29.0655	27.0727	26.9616	27.1111	28.4304	30.358	30.2464	27.0057	28.1019	29.1712	28.3738	27.9755	28.6565	28.711	32.2281	32.0077	29.5467	29.6609	30.4533	30.2505	31.1551	31.1035	32.1834
GRAA	22.0487	21.7705	19.6196	20.8822	19.714	22.0366	21.6294	19.6459	23.0285	21.5675	22.0434	21.2847	21.1471	21.2105	21.6155	20.7626	22.2456	22.6048	21.1747	22.0026	20.6497	20.9617	21.3326	22.6693	19.4302	19.4589	21.4294	20.5995	20.543	20.2548	22.5024	18.9188	22.0237	22.4572	21.8338	20.9793	21.0885	21.6131	20.9917	20.6032	23.065	24.1151	20.7057	23.1477	22.6549	23.0497	23.1576	22.8379	19.4183
ACTN1	34.064	34.1147	34.3362	33.5176	34.401	34.1497	34.2453	33.9203	31.3797	30.7327	31.6941	31.9459	32.4245	32.3985	32.1209	31.8354	30.6365	30.2835	29.1246	29.7113	30.2795	30.2358	30.3843	29.5732	31.1332	31.2905	31.3577	31.7985	31.4189	31.611	29.308	29.0596	30.0045	30.4704	27.2042	29.3238	31.1544	29.8294	30.7963	30.9802	32.0601	31.9508	33.4628	33.3866	32.1969	32.2995	32.6736	32.9179	31.9613
CADH1	24.704	21.67	23.5445	20.9795	19.9135	21.2462	21.3403	21.3032	24.1466	22.3543	21.5627	21.4421	19.743	22.1326	21.0301	22.6629	25.8058	26.7634	27.1999	26.8555	25.1544	24.9747	27.2385	27.6804	25.9043	27.8854	30.6913	28.6488	27.6495	26.1436	27.1749	31.507	29.7369	26.1835	27.899	28.862	25.8092	26.5484	27.1769	26.4204	25.2162	25.0796	24.5551	23.5513	25.6009	25.113	25.9251	25.3861	25.3956
SRC	27.2073	26.7599	27.6878	25.0687	27.1867	25.9233	25.0727	26.3076	25.2829	25.6799	27.6019	26.1895	26.018	25.3808	26.9661	25.4858	25.0809	24.9312	25.0068	22.9164	24.8857	21.4803	22.5623	22.6941	27.0268	24.6154	27.4301	27.2795	26.3747	24.7106	26.4613	27.663	27.5863	25.6243	25.7838	23.8007	27.7715	21.1457	27.2688	24.4127	27.3735	27.7544	27.0935	28.0366	27.8475	28.0593	27.7449	27.5094	25.5033
XRCC6	31.4775	31.7189	31.2458	30.7526	30.7731	30.7107	30.8523	30.9894	29.9101	30.5918	30.6403	30.6261	30.9009	31.189	30.8254	30.1707	31.0655	30.9176	29.6563	28.2272	31.0437	31.2089	29.8366	30.4892	31.874	31.461	30.9275	30.389	31.6156	31.0563	31.0736	30.8958	31.4911	30.6081	30.8107	30.0444	31.7026	31.3395	31.0527	31.4745	31.5229	31.5005	32.2271	32.1189	31.8176	31.9435	32.1327	32.1423	31.6692
XRCC5	31.2129	31.002	29.9393	29.5264	30.0575	29.6456	29.5676	28.7854	30.0053	28.9217	29.6963	29.9527	29.8975	30.1024	30.5471	28.8925	29.42	29.0549	26.8143	28.947	26.1014	28.8821	28.9223	28.5337	30.7525	30.617	30.0548	29.1647	30.7753	30.8079	29.189	30.101	30.3611	29.9285	29.3492	28.4563	30.9681	30.8724	30.6456	30.379	29.7709	30.035	31.1974	31.2336	30.7611	30.5327	31.1432	31.3	30.3116
IFM1	21.5449	21.115	19.7925	20.7912	21.3428	21.1596	20.5355	21.1353	21.0426	20.9757	19.6664	21.4017	23.7585	20.6027	21.8186	21.6515	22.2485	20.3284	19.1896	22.5444	20.5167	20.8975	21.2077	19.2937	22.8156	21.9176	20.4895	23.0693	18.912	20.7665	21.0127	20.4583	26.0253	25.4295	21.2441	20.8805	20.4373	21.8506	20.4363	21.4425	22.4406	24.7811	27.7054	28.4846	25.8361	27.3597	27.0421	26.6911	24.8891
GILT	19.8124	21.1273	20.9634	20.3096	20.7051	21.0897	20.6126	21.1317	21.1519	21.9815	20.9926	22.2523	21.3568	21.3216	20.15	22.7286	20.5061	20.4531	20.9714	20.3944	19.8729	20.0784	20.554	20.4524	20.5896	20.6541	18.8061	20.964	19.924	21.8518	20.1876	20.6814	21.35	21.951	19.4625	20.9424	21.9054	19.5238	22.4977	20.737	20.521	22.1101	22.7228	23.0723	21.4312	21.9938	22.6022	21.5895	21.9128
LAMP2	29.961	28.893	31.4125	28.6849	30.9871	31.2039	30.246	29.3173	26.797	25.048	31.9733	31.8696	29.995	24.9641	33.6029	32.9636	29.0745	28.925	26.0023	26.5556	29.27	29.1498	26.7184	26.4541	27.3964	29.3145	28.3703	24.4411	30.9026	25.8209	27.5947	28.6523	27.7108	20.2523	27.859	27.6347	30.324	29.1618	30.5341	23.1953	28.0328	28.594	28.1632	28.305	28.7199	28.9846	28.67	28.5063	27.647
CY24A	20.8661	20.6515	20.5005	22.7525	19.7833	20.4819	20.098	19.7198	21.2008	21.3037	20.4468	22.0452	22.6633	27.598	22.0516	21.5767	20.6039	20.6431	21.7375	21.4938	20.1982	21.4509	22.7462	24.4809	23.9933	21.3033	22.7438	21.5436	21.6687	19.2717	21.4432	20.4003	21.3331	24.8081	21.4413	21.8153	20.5306	21.8476	20.5818	20.9599	26.2605	25.8833	26.3374	26.0178	24.7537	20.83	23.499	23.3759	25.9592
SCG2	21.9545	21.2442	20.6054	21.1343	17.1973	21.8426	22.302	21.6737	24.4809	24.203	22.2944	22.39	21.0866	20.7679	20.0767	22.0264	24.1212	20.5655	24.8095	25.8177	21.5314	19.7927	19.5173	19.3494	17.9206	21.3651	24.2015	21.4968	26.9836	19.241	22.5127	23.3859	23.784	21.1438	23.9061	21.4306	22.8401	21.6497	20.824	25.0816	32.9085	32.8059	30.9249	30.6763	29.1388	29.72	31.3545	31.2695	32.0021
NCAM1	20.5369	22.5537	22.3872	23.5768	23.1605	23.3292	20.5385	22.4264	25.3011	25.3246	28.7156	28.0005	28.3521	27.3475	28.1295	27.0736	29.1752	29.4834	31.0989	31.586	26.676	26.7153	30.7196	31.393	28.3504	27.2726	31.3725	28.7716	27.4892	26.6234	30.3482	31.3366	32.23	30.8247	32.5454	29.8467	29.955	28.6673	30.1689	28.1418	32.7339	32.6516	32.7768	32.571	32.6945	32.1525	32.994	32.3998	32.5357
CSPG2	21.6375	24.3474	28.388	27.819	31.7392	30.9202	29.543	28.4505	23.3784	23.5499	26.4002	26.8448	26.1678	25.7559	23.8843	25.0856	26.6271	25.9439	27.0938	25.6717	27.7725	27.9034	28.0636	28.071	24.6636	23.9964	25.5535	26.8971	23.7964	25.2983	27.0593	22.9593	31.1159	27.826	30.2407	29.7156	25.6762	23.8304	22.0126	23.9959	29.7148	29.9796	31.5339	31.1769	28.3387	28.7163	30.69	30.6359	30.3916
ITA4	20.5217	20.2995	27.1072	27.0619	29.5912	27.6204	27.0057	25.5614	20.5225	27.2543	20.5053	27.8077	26.8986	26.3377	19.572	25.9374	33.1732	27.01	20.4018	20.5132	27.0375	28.5268	32.8766	20.9377	27.9198	27.7773	25.4092	20.5311	28.6067	28.5454	29.8054	29.521	21.1507	22.3681	27.1155	30.4188	19.871	22.0544	29.911	22.2165	31.0608	26.7651	31.9907	30.6573	25.8393	27.5544	28.1111	25.5579	32.5011
AT1A3	21.9846	22.8737	20.6039	20.3726	20.3492	19.9477	20.9727	21.2721	22.0978	20.7379	22.7421	24.788	20.392	23.1606	20.49	22.6394	25.1707	28.1644	29.2591	28.3844	26.8395	22.7741	29.7572	29.4885	25.8354	26.6702	29.8624	28.2592	27.309	25.3563	27.7792	30.0109	30.1655	27.7119	30.2391	26.9275	28.3644	25.7795	26.8595	26.646	31.7977	32.3216	31.3433	31.1311	31.9314	32.2309	31.9174	32.129	31.8027
PDIA4	32.1922	32.2204	32.4767	31.3888	32.2893	32.0581	32.0776	32.451	31.63	31.0387	31.8645	30.7069	31.7515	31.5442	31.634	30.6215	30.8062	29.9869	28.6427	29.091	31.0312	30.887	29.507	30.32	30.8931	31.1752	29.3164	29.2579	31.786	31.6991	27.2218	29.6402	30.0751	29.0103	29.6538	28.7152	31.5758	30.453	31.3529	31.415	31.269	31.3442	31.8159	31.6811	31.4735	31.69	32.3945	32.3229	32.4047
CO6	24.3067	20.3224	20.4855	19.237	20.5472	20.6873	21.2936	20.1108	24.5988	21.5266	19.6946	25.7032	21.1671	25.5559	21.1944	24.5109	26.5023	20.1029	27.4367	25.6122	21.5153	23.7991	26.7031	27.2078	21.2024	24.181	26.7029	22.6037	19.3535	20.1992	25.5856	21.3652	23.9015	25.756	20.5109	21.7487	21.1554	20.9884	22.1897	25.7107	26.4262	28.093	24.2003	25.2368	26.0885	27.1452	26.3521	26.5261	27.3816
CEAM1	27.4283	27.3837	20.8119	21.8953	26.0313	25.9287	18.3994	20.253	28.6031	27.4383	27.5649	28.2324	27.7234	21.7697	27.8385	27.2009	20.1369	26.8361	20.3189	26.499	26.1966	20.526	25.866	20.8399	22.3232	26.8208	21.6515	21.2884	27.7681	19.6763	22.4478	22.0078	22.3604	21.3218	20.4903	21.8552	21.429	26.2526	20.9496	21.0754	26.6557	25.0498	27.0874	26.4625	20.7999	26.9224	27.0082	21.5047	27.2294
TF	25.5534	24.8626	24.9707	24.9346	24.0519	24.23	26.1307	25.8628	23.9121	21.565	20.4675	23.0395	20.1553	20.6736	19.4202	22.608	25.0634	25.3267	21.4269	25.2589	20.3951	20.6377	25.2507	24.0739	20.3269	23.3831	19.2617	22.1392	20.98	20.4999	19.684	19.5426	21.4322	22.6447	20.5276	20.8545	20.2335	20.2796	22.2862	22.3053	24.3446	24.4597	24.3968	24.7211	24.0844	23.9406	23.0927	23.4424	24.4228
2B14	26.5865	26.8506	24.5595	25.5465	21.8383	21.5682	26.1636	24.9114	21.1692	20.5629	32.1259	28.2402	29.4434	28.2476	32.4907	30.5147	29.1361	29.055	20.4247	20.0488	28.2458	28.316	20.6475	19.6306	28.6833	24.0347	25.205	24.9476	28.4782	21.1671	27.4391	26.7669	28.4326	25.6754	27.825	20.8426	30.3051	29.2927	30.6081	25.1384	29.1065	29.4761	30.045	30.1428	30.5918	30.2774	28.661	27.8406	28.8892
2B17	19.9961	21.3312	21.283	21.4804	20.1884	20.6571	19.7499	20.566	26.3822	25.6626	28.0867	24.2383	27.1102	19.5301	21.9017	22.5326	30.1775	29.4505	20.5041	19.8699	20.9775	19.8857	21.0197	22.1228	26.9904	20.2725	20.1893	22.4987	19.8243	20.1132	21.5046	20.4852	20.1856	21.3041	20.9857	20.7633	21.4255	21.7523	20.2604	20.9626	30.3372	30.946	25.9195	22.6022	31.5005	29.6917	21.9861	22.0889	22.4766
DRB4	22.6021	21.8712	19.3284	22.0352	22.8482	20.9028	19.5233	20.9146	28.0374	27.3165	27.5251	24.717	20.5471	22.0057	19.3074	21.3531	21.3009	28.1237	26.5103	19.4975	25.5477	21.5363	21.7207	18.7999	21.8322	21.6479	20.9406	20.3232	21.3663	20.1078	22.5027	22.1586	20.5605	21.3361	20.2209	21.7908	21.6637	20.1377	20.7113	20.4412	25.9893	26.1134	21.2914	20.5496	26.8661	26.7874	21.0797	22.1507	25.5442
PLSL	28.4176	28.1649	19.161	21.1468	22.8441	22.9051	21.4097	23.2444	25.8216	24.2061	28.3382	26.2599	25.5189	24.5912	25.1842	22.8269	28.6163	26.9059	28.3216	28.4649	24.7916	27.3608	28.5947	28.5908	25.3198	24.6075	27.56	27.0642	27.1951	26.2732	25.5673	27.6625	28.7089	25.6459	26.327	25.5812	26.6026	23.1794	25.8195	24.5327	30.6573	31.0512	31.9251	31.7559	30.7924	31.1361	32.7843	32.2074	29.0899
ACPH	29.1775	29.0123	28.9731	26.4281	29.1116	27.6649	28.2577	24.9285	28.4189	27.4572	29.1167	28.3308	29.3035	27.6365	29.138	28.8377	25.9044	25.2345	25.8503	25.065	20.3738	24.226	26.3624	24.7168	28.7915	28.1334	29.0953	27.9731	28.2559	28.1322	26.0676	25.6759	28.3158	27.4688	25.7887	26.1756	28.9359	27.8289	28.9605	28.0919	28.9274	28.8149	29.0284	28.3969	28.8586	28.6032	28.7828	28.9436	29.1625
GYS1	28.0819	27.5483	29.6462	27.2015	27.7311	26.1166	27.6649	25.1269	26.2103	25.5143	23.929	26.0287	25.328	21.1157	23.9335	25.4231	22.0815	20.8398	22.4227	24.0916	23.3574	20.9799	22.5055	22.0681	22.3015	23.4521	23.3881	23.6593	24.6405	24.8178	22.3984	20.9677	22.3991	24.3309	18.5179	22.7311	23.6947	23.1073	23.7107	22.3388	25.1662	24.3973	25.1544	24.1009	25.4182	25.3249	25.2631	25.1223	25.1646
CD59	31.1234	31.0051	33.4526	33.5427	32.9015	32.8786	33.2311	32.9517	31.0833	31.2364	33.1982	33.9916	33.0598	33.2796	32.6858	31.448	33.7319	33.4728	33.4394	33.3501	33.2785	33.2821	34.2357	33.2076	34.5175	33.7024	33.7821	33.5043	33.3915	33.4738	32.686	34.4751	33.3509	33.6808	34.4477	34.4642	33.9015	34.0343	33.7398	34.332	31.2555	31.1877	30.648	31.4741	32.285	31.0894	31.2072	28.6363	31.1106
MIF	31.6102	31.7561	31.9622	29.2314	31.8916	30.1125	31.1875	31.2032	27.798	26.8248	31.8781	27.6761	31.7064	30.0325	23.1715	30.9538	30.4851	30.0784	29.4602	29.5764	29.3847	29.7575	28.5373	25.9659	28.8104	31.0424	32.0615	29.011	30.4954	31.4139	27.5513	30.0018	28.6871	23.1919	32.4542	26.966	31.2515	30.3981	30.7593	27.0323	31.8269	31.5977	32.0968	32.1012	31.8335	31.7276	31.6047	32.1761	31.3797
FOLR2	21.2652	20.1585	19.0688	20.3432	18.9669	21.095	20.5703	21.0963	21.1388	24.4166	19.4373	21.7885	21.5572	22.168	21.3171	21.6931	19.3175	20.8492	20.1908	25.8817	21.8473	20.6761	26.3805	25.8704	24.9094	21.7539	25.4186	24.9087	21.6866	24.9435	25.6921	25.5622	25.5074	22.6658	26.436	23.8518	22.7661	21.1314	24.6957	21.8263	28.1907	27.2593	28.7627	28.0141	28.5781	27.7834	27.2935	28.7242	27.0356
CD99	25.6642	25.8875	25.8926	25.0675	26.6228	26.9425	26.8266	26.6238	24.7983	27.7787	27.3047	27.3233	27.8307	27.4446	26.8668	27.7545	20.8772	19.7088	27.6542	28.0113	21.3045	20.405	28.1343	19.2033	20.2324	21.9088	26.0075	21.5043	20.9482	21.8147	21.6249	25.3807	29.37	28.7704	26.3134	26.9896	26.3311	25.6275	26.4379	21.1026	22.5597	27.3792	27.2557	27.1602	26.2711	26.3217	27.6183	27.6153	27.3932
HGF	21.9046	21.4521	19.8787	22.0184	19.5687	20.345	21.3813	22.3551	21.4383	22.813	20.4312	22.2243	22.2089	21.4869	21.4947	20.1962	22.5748	20.9711	21.0702	19.5803	22.4928	20.9843	19.7721	20.4937	22.5471	21.9335	21.6456	21.2647	21.5572	21.138	21.9215	19.1361	21.2184	21.3963	21.0356	21.2434	20.4357	21.988	20.9791	22.0519	24.0972	24.4443	20.69	23.3785	23.6388	23.8543	23.8878	24.0298	25.4172
GLU2B	31.4841	31.4732	32.3181	31.0161	32.1664	31.6348	32.5657	32.4476	30.8907	23.5075	31.4879	31.3899	31.5444	30.8863	31.1923	31.4729	30.703	31.0701	30.5389	29.2458	30.9966	31.7443	30.3597	30.9937	30.316	29.9313	30.3549	28.8227	31.4488	29.3405	28.8979	30.6659	30.4228	30.6391	30.7082	30.2175	30.7191	29.2096	31.204	31.1937	31.1599	30.9139	31.6318	31.2725	31.1752	31.0248	30.9774	30.9053	31.5767
HCLS1	23.1523	24.6115	20.4143	20.6566	24.2142	22.2915	23.8709	22.0269	18.6961	20.8008	20.7892	22.9149	22.0815	22.1857	19.4054	24.2846	23.5356	22.3426	23.9527	23.8916	21.2725	20.3838	26.3837	25.6507	21.1609	22.7126	24.5237	20.9363	20.5822	23.1025	21.849	24.534	23.8687	22.9826	21.3899	21.7431	21.7166	21.3182	22.0107	20.721	28.2029	29.1655	26.9748	27.1912	28.2464	28.6753	29.2528	29.6509	25.9635
CX7A2	28.5422	27.204	27.7867	27.7833	28.4836	27.4691	28.5962	26.1762	27.4899	21.5589	28.8685	27.102	28.8781	29.3848	29.3011	28.7085	24.7308	24.716	25.5302	23.7929	23.3006	26.2837	25.1021	26.885	29.2836	28.1261	30.05	28.3999	29.1115	28.3642	28.2347	27.8283	28.0702	27.4779	26.1963	25.8208	27.7641	28.1449	27.3515	28.7537	28.9337	29.2927	28.8787	29.0158	28.7907	28.8593	29.2594	29.2097	29.9421
AT1B2	20.5604	21.9262	19.4961	19.5567	20.7386	21.8948	20.7674	22.397	23.1215	21.3497	19.0465	20.8455	19.491	20.707	20.7301	21.3085	20.6528	20.9905	21.1564	20.3668	20.4665	20.3113	19.8229	22.1243	20.9076	20.9486	21.462	22.1706	26.9608	21.4658	21.9491	19.3388	26.434	21.7721	19.6044	22.8569	19.6192	23.1819	20.5644	26.1882	27.092	26.9651	26.6688	26.4187	26.5388	26.4623	26.2481	26.2491	26.887
KPYM	36.3836	36.4044	36.0242	36.2845	36.033	35.8454	35.9566	36.003	35.5633	36.0357	36.1719	36.5715	36.1025	36.4321	36.5163	35.9708	33.4886	33.8856	33.2718	33.3891	35.4818	35.8651	32.6952	33.0808	35.987	35.449	35.1372	34.4502	35.2021	34.4519	33.8068	35.0447	34.7904	34.5141	34.0464	32.5831	35.7323	35.4677	35.2654	34.4396	35.2756	35.328	34.8419	35.026	34.9332	34.949	34.8015	35.0443	35.0829
ENPL	34.9213	34.9799	35.4513	34.8033	35.0714	34.7084	35.1407	34.7706	34.425	33.7785	34.4257	34.2152	34.2515	33.6511	34.5926	33.743	33.4036	33.2975	32.6375	32.4055	34.3906	34.3023	32.3644	33.0101	33.5293	33.666	32.8303	33.151	34.4316	34.6836	31.8637	32.8167	32.7803	32.0351	32.7961	30.9721	33.978	33.8206	34.0651	33.9975	33.3833	33.4404	33.7882	33.8423	33.5004	33.7211	34.5072	34.5244	34.4986
IDE	28.4596	27.9132	27.7255	26.6022	28.0581	27.3045	27.5744	25.9418	25.5206	24.7247	25.1834	26.1435	27.4147	23.5306	26.1776	25.8797	22.2956	22.2515	23.3215	21.2425	22.8618	21.2266	21.3831	21.9288	22.8829	25.2068	19.7393	21.0219	22.6057	25.2869	22.303	21.7051	20.0837	25.6497	21.0818	21.4739	26.9725	24.0715	25.5577	23.8885	25.4982	24.7967	24.9397	25.1324	23.2898	23.4462	24.6202	20.4723	23.6747
CX6B1	27.3249	27.0228	27.7933	24.4294	27.3488	25.7451	24.3921	25.2199	26.4611	25.7607	27.8841	27.4204	27.814	24.5483	26.9174	26.7628	25.0763	24.9537	25.9237	25.3996	23.7626	23.953	26.7116	23.1346	22.1624	26.0777	25.3554	24.0334	24.4975	24.8609	25.8033	24.5263	27.1834	26.1266	25.3937	24.4877	26.5005	26.0272	25.4085	21.4978	28.0721	27.9363	26.6148	27.5404	27.914	27.399	28.2534	28.0484	28.389
HNRPL	27.5544	27.3368	27.5003	27.1765	26.1776	26.0366	26.2196	27.077	26.8141	27.5571	28.2247	26.804	28.3137	28.1722	28.0655	27.0316	26.945	26.4759	25.414	26.2416	22.3626	22.599	27.5828	26.4794	29.8612	28.9935	29.3868	28.5923	30.1941	29.1568	28.2149	29.1571	29.212	28.4334	29.3185	29.063	30.2605	29.0722	29.778	29.8179	29.961	29.7688	30.2347	30.2402	30.2073	29.9745	30.3556	30.1654	29.9073
SYDC	31.3421	31.4195	31.1467	30.6796	31.1715	30.7027	31.1388	31.2182	31.11	30.651	30.5897	30.4774	30.3797	30.3275	30.0965	29.7152	29.6195	29.4948	24.3699	26.4797	28.7549	28.2965	25.1712	24.3834	30.851	31.2787	29.8307	29.7879	30.9332	31.3476	29.533	29.6193	29.6003	29.0066	28.8457	27.6156	30.7867	30.1442	30.727	30.7545	29.9871	30.0053	30.0552	29.979	30.5491	30.3282	30.7173	30.3998	31.6426
BRAF	20.5861	19.5219	20.8681	20.8924	20.4092	20.3136	20.5938	22.7288	21.1869	22.3275	21.6752	24.2637	20.5775	21.6325	21.4638	21.6182	20.0877	21.23	21.6632	20.531	20.4005	21.2776	19.6126	20.4686	20.0651	20.381	20.53	20.4276	20.4918	22.2555	20.1502	21.9942	19.2258	21.8117	20.6388	22.4082	22.0518	21.1939	20.3505	20.8042	24.29	24.1581	23.4613	23.0062	21.7386	23.0661	21.6131	21.4086	22.519
CBPA3	22.3409	24.9973	23.7635	23.978	20.5831	23.7583	23.471	24.1119	23.7278	23.5104	20.8315	24.2113	22.7978	23.1639	21.2607	24.5286	21.2906	20.8667	20.6057	21.6776	20.1652	20.1888	20.9457	19.8616	21.2873	23.2977	23.026	19.9576	19.9459	20.4559	23.2643	22.6077	28.6536	25.9197	28.2709	24.2852	26.9937	25.3352	26.5064	24.4571	23.2338	24.2698	29.8331	29.8385	26.9884	25.7507	26.2943	26.3309	26.6099
ALDR	31.6258	31.6377	31.1238	30.6132	31.1615	30.6355	30.4674	29.4057	30.7292	25.6339	31.6327	30.3137	32.5699	31.6323	31.8623	30.1999	33.483	33.4795	33.2891	33.3424	32.3096	32.6557	33.8468	33.8277	33.8026	29.057	34.5462	32.3597	33.1031	31.5729	33.3275	34.9418	33.6849	32.782	33.1444	31.9266	32.6661	30.4962	33.2416	32.2958	31.3059	31.0368	30.6909	30.3224	31.0415	31.2257	31.3087	30.8643	30.8225
PVR	25.5695	19.6315	28.5853	28.6878	28.7116	28.4778	25.0536	28.0214	25.9677	26.1029	26.904	26.3414	26.239	24.9834	26.0733	24.899	25.3849	24.4051	30.0483	27.8612	19.8555	20.1359	21.0448	26.7137	26.4089	24.127	26.1371	24.7368	26.4315	24.9212	24.2589	25.6753	26.2289	21.1923	25.556	20.7314	23.8034	25.6408	25.657	20.0196	28.7817	28.8877	25.9262	23.4247	29.4068	29.2676	29.1495	29.0507	28.7598
RAC2	21.1757	20.1206	20.5411	23.7597	21.0574	22.1372	20.5899	21.4119	21.7553	22.0951	20.4091	23.5241	20.9638	20.0603	21.9136	21.0474	20.1391	21.3428	20.7197	19.2531	20.4994	25.7724	19.7	21.2984	19.5256	20.6112	22.2283	21.5201	22.1675	21.8631	21.2837	21.7193	26.2896	26.9728	20.6407	26.6927	20.6005	25.5812	25.3319	25.8129	23.4117	23.784	24.8978	25.379	23.889	24.1352	27.6826	27.6633	21.4298
ARSA	27.4978	27.3381	27.4141	26.4441	28.1452	26.9981	26.4318	24.8857	25.6909	21.3668	27.5162	26.6046	28.7626	27.4422	30.985	28.7706	19.696	20.6545	21.0679	19.5953	20.8194	20.4104	19.5336	19.6599	26.0986	25.6383	21.4484	22.9542	24.5027	22.757	21.7029	21.0455	22.6614	22.8083	22.3127	21.397	27.4057	28.4621	27.3134	24.7916	24.3451	25.3248	22.5195	24.2517	25.3735	25.6553	25.5864	25.7194	25.5451
EZRI	30.6419	29.7916	31.1797	31.5789	31.3619	30.6007	30.504	28.5048	30.4914	30.2625	31.0799	30.3853	30.677	30.8935	30.6988	29.9745	29.5388	28.8595	28.9019	29.2426	28.2232	28.9348	27.7468	29.1097	30.0946	30.1404	30.4216	27.9459	30.3412	29.6736	29.2481	28.1959	30.1825	25.0036	30.1911	28.7579	30.5237	26.8483	30.369	28.6955	30.4212	30.3861	31.056	31.032	30.1002	30.1688	30.6423	30.8131	30.661
ATF2	22.6774	19.9585	20.7789	22.3429	24.9271	25.1851	19.461	20.7747	21.1203	21.0965	24.7195	24.563	22.4404	22.4696	20.697	21.8729	22.2835	21.8488	19.7453	20.2329	20.5716	21.5777	20.248	19.9985	20.4038	22.3922	20.4367	21.122	22.2586	22.286	21.0397	20.1165	23.9842	22.0887	19.5894	20.0954	21.2701	21.4465	19.8602	21.3933	20.8018	21.592	20.9334	22.5844	20.8891	20.5289	21.9952	22.1995	22.1953
VAV	18.2727	20.5556	21.2123	20.5033	20.7147	20.6707	19.9643	21.9192	21.4316	22.009	21.1558	20.7283	20.1354	20.8596	20.8346	23.0463	22.5635	20.9192	19.7953	20.3939	22.036	19.8725	20.4899	20.4873	19.9324	22.1045	20.1396	20.3484	20.2604	20.617	21.3545	22.0194	22.258	20.5309	21.5069	21.1692	21.3183	20.7713	19.7392	20.1391	22.8087	22.7382	23.3377	23.4891	23.3373	23.383	24.6108	23.832	19.8707
ELN	21.7124	20.3755	24.8557	24.0315	23.4736	23.1434	20.3498	21.1266	21.7451	19.7311	20.8284	23.8133	20.5919	21.7999	22.2049	20.9609	22.281	20.4928	19.8247	19.3046	21.6545	21.6715	19.53	20.2035	19.9389	20.5471	21.7244	21.8448	20.0378	21.9904	22.0405	20.5028	27.0745	26.6621	21.6759	22.4253	20.9634	21.2644	19.916	22.939	22.3069	23.3454	26.8576	26.7971	24.704	21.0515	21.0957	20.87	24.9219
NDKA	29.0428	29.0005	30.4735	28.5887	30.5568	27.8694	27.31	28.2904	23.1549	20.8167	28.399	28.1303	29.8927	27.9892	29.8305	27.2539	26.2023	20.8221	19.8648	20.8732	26.2264	24.2221	21.1948	26.5973	25.5678	26.1915	28.2683	28.6998	29.2769	28.1896	28.5556	27.8454	28.6129	26.5272	26.9896	27.9579	28.5904	28.618	28.4796	28.9834	29.4207	29.3863	29.0277	29.0369	28.8673	29.2755	29.4121	29.2616	28.9792
NQO1	31.0408	30.9997	31.6478	30.59	31.0312	27.6677	31.738	31.3988	23.2351	25.0363	27.5387	25.7671	29.8035	28.915	30.3553	26.3154	21.8708	20.2464	20.5793	20.3427	21.7923	20.4148	23.2263	20.8099	22.645	23.3251	24.2034	22.4123	24.4116	23.9458	23.9494	25.2138	21.2237	22.5599	25.5633	26.0294	27.2454	26.951	23.3333	25.5539	21.197	21.549	22.7233	21.9753	22.0183	19.0538	20.8021	23.1867	20.166
RS2	30.9695	30.994	31.7155	30.1545	31.2047	31.2169	31.0948	27.6904	30.6595	30.6422	29.5223	29.8079	29.3927	29.5699	29.6948	29.1127	27.7989	27.4682	28.4937	27.1945	28.2615	29.6183	27.3731	26.9466	31.2372	29.0749	26.5911	27.5933	31.218	29.0885	28.3898	28.8877	24.0002	26.0577	27.3062	24.2466	29.8815	30.1449	30.4944	29.605	27.3488	27.9821	30.0363	30.0036	29.7045	29.152	30.6634	30.5649	29.4297
CHIN	22.3819	22.719	19.917	22.4286	20.9721	20.8222	20.5266	20.452	24.0701	24.0334	22.6617	21.9652	22.6662	23.0816	24.4956	24.3695	21.8197	22.163	19.5886	20.4237	22.2947	20.5806	21.1149	20.1813	23.2811	21.3603	25.5241	21.5229	20.3798	18.3207	21.5844	21.315	22.406	22.1766	19.8865	23.1065	21.0784	20.1717	22.9748	24.219	23.6531	24.836	23.3705	23.309	24.9597	25.0266	24.1	24.2383	24.2409
RFA2	26.548	25.6281	27.2912	27.4767	27.2249	27.3639	26.7647	27.2074	27.2179	26.9946	28.2151	26.2784	27.4308	27.1677	27.2237	28.0794	27.174	26.3904	26.3642	19.5823	27.017	26.5868	26.8585	25.7601	24.5598	25.6678	25.247	22.0401	27.1013	27.4689	21.6569	19.4843	25.8858	22.3216	26.619	25.7939	27.1148	27.5327	26.6638	26.1089	27.7057	27.7703	28.569	28.3595	27.7436	27.2095	28.2099	28.2876	28.5358
TIMP2	25.2319	25.6099	27.9528	27.1725	26.3007	27.0311	26.0738	26.7769	27.4647	27.2869	28.0465	28.2539	27.797	27.3174	27.477	27.0897	27.6438	27.4338	26.098	26.2108	20.2711	27.1115	26.2356	26.0014	25.4189	22.0247	24.6185	25.8231	25.0991	25.5116	25.0571	25.2322	24.8711	22.4977	23.7568	24.3981	25.3276	26.0451	25.8022	25.4851	27.8134	28.4145	26.8363	27.4823	26.767	27.0109	26.9851	27.1808	27.595
CD44	30.4458	30.5892	30.6359	30.1611	30.6798	30.6949	31.7059	31.7993	31.057	24.0433	30.8591	29.5448	31.0763	31.2798	31.0235	29.8055	31.0855	30.9845	29.9978	30.1849	30.9308	30.3511	29.3803	30.47	30.4452	28.5193	28.6185	29.3346	30.0125	29.3989	29.3924	29.0918	29.046	29.3843	29.6343	29.2813	30.4391	30.6201	30.4312	30.6528	30.3676	30.133	30.0125	30.5096	31.1841	31.2016	31.0534	30.8183	29.7117
ANK1	21.4818	21.093	20.7127	21.9737	22.5605	21.0551	20.9378	19.9202	20.5795	19.9548	20.8845	22.361	21.0781	20.5851	19.8375	24.0983	20.7903	19.6028	19.6745	20.0993	20.4539	22.037	22.5789	21.7155	22.1209	21.3678	20.3044	22.4005	21.4127	21.9084	22.8353	20.9991	21.8626	21.6827	20.3084	21.2913	20.4148	21.0025	21.1276	21.7964	24.4113	22.7129	23.6999	24.2371	25.9261	25.2717	23.5827	23.6436	23.0434
CREB1	20.3914	22.2438	19.4504	19.8687	22.4305	20.368	25.4029	25.2928	21.3129	24.7349	20.6421	21.5037	21.9351	20.478	20.5534	22.8174	21.2082	24.3325	21.8368	20.9924	24.4562	21.7946	20.6762	21.1504	20.8301	19.1302	20.1978	21.0922	26.2751	24.0732	20.6665	20.2591	23.033	22.583	24.0223	21.3066	23.3906	21.0611	21.2617	21.3626	20.77	20.3894	24.6628	24.5551	23.5937	24.0483	24.1767	24.0855	24.1827
PGFRA	24.1594	24.8451	23.1062	24.6538	22.9695	23.9131	25.3184	24.8591	20.0794	24.0057	20.4592	24.7205	23.2745	24.5506	22.8123	25.7337	20.847	21.4616	25.7842	26.7843	25.7095	22.2943	25.326	22.3875	23.5083	23.1958	19.9681	20.8453	25.5521	24.9482	28.1961	22.0874	22.0247	24.1579	20.5466	25.2464	23.5066	22.2872	23.5018	24.3452	23.3322	21.6332	20.1105	21.3774	23.3059	22.2338	21.3079	21.7241	22.2511
BGAL	28.597	28.4725	29.3889	29.1484	30.058	29.5035	28.3015	28.0299	29.3062	30.2116	29.8573	27.7046	30.3146	29.8752	31.2785	29.3232	23.8363	25.1297	22.0247	22.5991	21.6635	22.2927	26.6007	22.2926	27.8841	26.0957	21.5173	23.417	27.8043	28.3917	24.5666	23.8198	23.4411	22.1565	20.9153	24.485	28.4365	27.2629	27.1802	26.108	27.1449	27.1932	26.9847	27.2412	26.9495	27.0989	27.7159	27.3046	27.2871
PECA1	20.6913	20.2146	19.4254	21.2796	21.4808	21.6855	21.9426	20.5284	25.1104	24.6487	19.8877	20.7045	20.7209	21.8713	21.0065	21.3521	22.3948	21.735	23.9531	19.6038	22.9786	20.2817	19.8548	21.117	24.5988	24.0001	20.3211	21.0142	21.5564	25.6508	22.7527	20.5449	23.6023	23.7785	20.4346	21.6444	24.9709	24.6647	21.3119	22.8689	25.3479	25.398	28.131	28.1488	26.7679	25.8631	27.9995	28.0133	24.9024
PP2BB	25.8027	25.6374	26.3307	21.7504	26.0606	23.7619	26.0363	26.9559	25.5509	25.8123	19.7085	26.1628	26.3393	23.3669	25.6226	25.0573	21.0742	20.6337	22.616	19.1603	20.94	20.8328	24.7285	19.9771	25.4219	22.5642	21.8677	19.9839	21.0439	25.0626	19.9374	25.7361	20.5481	21.3524	19.0103	19.9988	24.8471	20.6766	19.6593	19.8881	26.0423	25.472	25.461	24.8365	25.2161	25.0336	25.5012	24.9034	24.9831
KCNA2	21.4346	22.0845	22.064	21.8793	19.9055	20.4041	20.227	20.6264	21.3153	20.7913	20.5634	20.2761	21.2839	22.2699	19.686	20.4674	20.6361	21.665	20.0208	22.0453	20.4271	19.9018	22.2047	19.9218	21.7274	20.4426	21.3872	21.2948	21.7888	22.0619	20.1913	21.33	19.4391	23.0268	21.4945	21.5265	22.1992	20.8221	19.923	20.1307	22.4904	23.4555	20.8784	22.7425	20.0554	22.0649	23.417	22.6604	21.7131
H15	22.8492	23.83	20.3394	21.5041	21.4162	20.3348	20.5479	20.1294	22.861	25.8342	21.9433	23.8054	27.1637	27.1347	26.2696	25.6413	29.9784	30.7114	30.5918	30.7159	31.838	31.3325	30.5768	31.6052	28.56	27.5679	26.3356	22.6832	29.5659	27.3527	25.677	26.2744	27.2429	25.9762	27.619	26.2355	26.8338	25.757	27.979	26.8069	31.029	29.6991	30.9523	31.0111	29.418	29.4817	30.4638	30.2058	30.9657
H13	23.2316	22.3821	20.1435	20.2094	20.1452	23.4914	21.1129	21.7902	27.532	27.9702	20.3065	22.7222	22.5704	22.7733	20.3148	21.9099	25.4581	23.9473	23.7372	26.9589	24.8551	24.917	27.5209	27.2067	23.9305	22.3906	24.1185	25.6315	23.9814	24.2733	24.4602	25.628	24.3859	23.8291	25.3949	24.3085	22.1706	23.1417	22.4985	23.6281	29.0021	28.64	30.6553	30.5941	28.9104	29.0512	30.6446	30.9407	29.2615
H12	27.8448	27.599	19.8342	23.8693	22.22	21.2531	21.9889	23.5997	26.7935	25.1754	21.2795	23.4142	26.8323	25.778	24.9537	24.6747	32.5596	32.4191	31.9602	32.232	32.0757	31.442	32.5993	32.4501	27.3813	26.7239	29.1946	28.5851	26.4633	26.3805	27.9046	29.3953	30.3146	29.3546	27.7791	28.3716	23.748	22.2677	26.5322	26.4038	31.5664	31.8259	32.9539	32.9683	31.5994	31.5284	32.7855	32.8317	31.1357
NCPR	27.846	27.6967	27.0761	27.2381	28.1627	27.6779	27.3002	27.3583	27.6346	27.6545	26.985	27.2126	27.9378	27.1823	27.8126	27.2833	25.0486	24.0764	22.7371	23.8619	21.271	20.947	25.15	22.5616	25.7947	26.7259	25.4207	27.472	25.7519	25.831	25.8567	26.5169	26.2585	25.8877	22.4244	26.2934	25.7173	26.9014	27.0263	26.7576	27.0897	27.5841	27.6909	28.0235	28.0498	28.3782	28.6291	29.0117	28.4058
MGMT	24.7256	24.4749	20.979	23.1051	20.0798	21.4774	20.0381	23.2486	24.3508	24.1238	23.586	21.9272	21.9793	19.7887	20.8005	23.1976	19.7649	25.4658	22.7059	21.2845	21.2347	20.4369	19.8758	25.1983	21.3757	21.7345	20.2514	22.3435	18.5436	21.2818	22.0111	19.4689	23.0744	21.3165	21.5398	21.1043	23.1279	21.3828	24.3161	23.7813	24.9066	23.9561	21.2404	24.6965	21.5575	24.1019	26.243	25.879	22.7838
FER	26.1845	21.5475	20.7282	28.1131	23.7032	20.3298	22.3558	23.3719	21.4649	26.4686	22.0794	24.7041	20.2811	26.3967	26.7066	21.6592	21.2024	22.338	22.2495	20.2513	21.0329	21.462	19.4429	19.8268	24.3308	24.8832	21.9483	19.4581	21.1052	20.2826	21.7086	21.8929	21.6296	22.1659	20.4051	20.8613	21.0356	21.2933	20.8702	21.0024	24.2627	24.4082	24.7846	22.4707	20.7456	25.4316	22.107	24.9173	20.8871
AT2A2	30.4753	30.5413	31.7656	31.0311	31.2628	31.0834	31.5042	31.2812	30.7478	29.9994	31.1702	30.7558	31.086	30.6447	30.9958	29.353	30.5299	30.7488	28.2469	28.7161	29.1358	28.3438	28.4824	29.5749	30.8534	31.4746	30.0803	29.8271	31.1264	30.5869	29.2251	30.1673	29.3265	28.9842	29.5054	29.6727	30.6043	30.5421	30.8685	30.8049	31.0166	30.8547	30.7893	30.9636	30.9073	30.7888	30.7266	30.7463	31.7375
CBPE	22.8823	22.9892	22.1633	22.1681	24.41	23.0148	20.2001	23.5094	20.9283	21.6346	22.0849	21.0742	24.1585	22.5711	18.8319	21.828	20.0474	20.4667	20.4508	20.6573	21.681	23.0009	20.687	20.2091	22.1085	22.0701	21.0698	22.4009	22.9301	21.6102	21.2231	21.435	22.1105	22.0298	20.3017	22.4933	19.8651	21.9091	18.8631	20.8121	27.7836	27.6251	24.0392	24.8176	24.0687	22.7678	27.5226	27.6594	26.0839
PLCG2	22.0289	21.7793	24.4676	24.5632	24.6807	24.7666	24.726	24.2165	22.0118	24.1873	24.2658	22.5977	23.8541	20.0595	24.2097	20.3057	20.8992	22.4108	22.5804	22.6284	22.7611	22.0446	23.944	19.9642	26.3947	25.9136	23.5701	24.395	22.5335	22.0354	22.0686	21.6083	27.3325	22.2048	25.3075	21.6016	24.0591	22.6612	26.4181	19.1555	27.5961	27.4213	27.499	27.2314	27.6847	27.5135	27.8263	27.9859	26.892
YBOX3	28.872	28.9069	29.603	29.6662	28.7919	28.0583	28.4657	26.8648	23.9886	26.8529	27.7962	26.6188	28.4265	28.1781	27.2794	27.3806	27.3447	27.1665	21.1436	19.8104	26.9503	27.2743	22.259	19.6417	23.9143	20.877	27.4637	26.0102	27.6749	26.2775	25.325	26.042	20.6933	21.231	21.4667	24.543	27.5183	26.5899	27.3643	23.2614	26.795	26.5606	26.8421	26.1835	26.1708	24.8402	24.0669	23.5815	24.3521
ZNF22	20.7081	21.6887	22.5702	20.9023	21.4003	21.4547	20.8996	21.2792	22.5178	21.4437	18.7763	26.3513	21.0791	21.3137	20.5456	24.333	20.8026	27.0049	20.6053	21.2295	19.3485	21.2401	20.9689	20.3121	20.7253	21.2952	19.9445	21.8594	21.4635	20.729	20.3867	21.8186	22.2445	21.2193	20.8203	22.2235	20.5194	22.437	21.7912	21.8499	26.6843	20.8171	21.717	21.2062	20.7333	21.1987	21.9201	24.4031	21.174
NAGAB	27.6308	27.4921	28.4195	27.2687	28.5026	27.8589	25.4424	20.6399	28.7993	28.355	29.7814	27.5497	29.6633	24.8906	29.3285	26.7406	27.9991	26.8597	26.2132	25.4991	26.8604	26.4455	20.5079	20.2138	25.9118	27.0139	24.1208	26.2275	26.7193	26.2108	21.1333	20.3302	21.1711	21.5873	24.8331	24.7504	26.0316	25.9819	26.5039	25.5642	27.6961	27.1725	27.1218	26.5856	26.9401	26.3103	26.4629	26.9126	27.7126
RHOQ	19.2112	21.0604	21.8689	22.454	20.2267	18.7978	23.8518	21.8585	24.163	21.4951	25.0001	24.3668	19.6779	21.3629	20.1952	22.3877	21.7858	21.3886	20.5562	20.3887	21.309	22.3185	20.9041	20.6453	20.6428	20.615	21.9184	21.4845	20.502	20.4598	19.85	21.9205	20.4014	22.327	20.8461	24.1459	18.8144	20.6916	21.4456	20.8637	23.1196	24.1731	20.0106	22.4221	23.1532	22.0391	23.481	26.4199	24.5905
TMM11	25.4653	25.1502	26.3734	26.3229	25.7466	25.4254	24.993	25.454	26.3863	27.0655	26.6428	27.0954	26.1051	23.5198	26.1983	26.8094	19.6318	20.1845	20.9725	19.6112	21.6244	19.3641	20.6627	21.6748	25.3985	25.7599	24.905	21.7941	25.041	25.8285	22.2296	25.3414	20.2797	23.3797	25.6798	25.7354	25.3359	26.104	25.2253	25.6786	25.9642	25.4393	25.307	25.5119	24.1322	25.1488	25.1646	23.0754	26.2158
AATC	28.6421	28.4346	30.2171	29.5069	30.4563	29.7074	27.8875	28.7388	25.5386	26.526	28.6268	27.916	28.9884	28.5973	28.2247	28.2711	28.7608	28.1458	28.0051	28.6144	24.5517	27.5075	29.1929	28.6706	28.1511	27.9857	29.8909	29.6553	28.7734	27.9415	28.2826	29.0811	30.277	29.3381	28.8593	28.3942	29.1381	28.6455	28.8169	28.1314	30.22	30.2599	29.1739	29.1146	29.6722	30.1346	30.3045	30.4934	31.1759
KPCA	26.9785	26.5776	28.2954	27.021	28.541	26.5038	29.0435	27.7492	25.8678	26.401	29.3868	29.0062	29.7173	28.4826	29.1285	29.2895	29.4444	30.1628	30.9929	30.9364	29.7936	29.9932	29.8779	30.9334	31.345	29.6284	31.4308	31.2025	30.7485	29.9078	29.5292	32.1134	31.6865	29.4126	31.254	30.9688	30.5963	28.3032	30.8489	29.7666	29.6071	29.6407	29.4385	29.9275	30.1795	30.153	29.6077	29.5424	30.1627
ITA2	24.3277	23.8958	28.711	27.0793	28.8246	27.5138	28.4365	26.5307	27.8588	28.3887	30.0942	28.7015	29.037	28.0034	27.5513	27.4901	27.0429	26.4855	26.219	25.9736	28.1667	27.8964	27.1639	26.3429	28.9006	28.1542	27.5631	27.2323	29.1445	27.7365	27.0495	28.2946	27.8872	26.5829	28.4943	26.4788	27.116	26.5005	27.4158	25.3545	30.2924	30.072	30.0085	30.098	30.8328	30.8194	29.5157	29.1924	30.4973
CXA1	26.7036	26.4449	27.7263	27.0125	26.795	25.777	26.6952	26.356	27.2783	26.6926	23.1763	26.1631	27.2142	26.005	25.5296	24.4994	26.764	26.8691	19.8266	21.3178	26.7009	26.3271	21.4627	19.6198	25.9089	27.34	25.6804	26.064	28.0608	28.5487	25.7151	23.5213	24.1444	25.2847	23.1813	20.7557	27.9526	27.1872	26.7886	28.116	23.2954	22.6588	21.5351	21.0253	20.5759	20.2036	24.3543	23.8643	20.5095
UBF1	24.3667	21.0816	21.3843	24.2743	19.2353	19.8365	21.7651	24.4652	24.5178	25.2868	21.8597	20.8598	21.3934	20.6538	20.4568	22.8177	22.4991	20.6022	24.7787	23.713	19.9153	24.6469	23.3231	21.5966	26.2006	23.41	23.2867	22.0631	25.549	23.0213	21.1402	20.786	24.858	21.4563	23.544	24.3421	25.9804	24.7019	24.9371	24.5011	25.2068	23.3149	27.766	27.4239	25.6947	25.2942	26.0121	24.7707	25.2622
JUND	21.7536	20.4785	19.5532	20.6016	20.4274	20.905	21.5496	23.2582	21.3509	21.4919	22.5348	23.4583	19.7446	20.4301	21.0251	23.2591	21.7102	23.5522	22.1362	21.3167	22.6426	22.3137	20.5292	21.9119	22.1199	23.4405	20.9312	21.8229	20.4808	22.8827	20.9802	20.8284	20.7806	22.0956	22.6755	21.2962	22.5187	20.594	23.0775	23.0334	22.1016	22.7329	22.9099	23.1562	22.9781	23.7731	20.8828	22.6103	22.4827
NDUB7	24.1457	20.8206	24.4444	25.1004	24.6118	25.1494	20.6796	22.1056	25.6763	22.6043	22.8013	26.7189	23.5853	24.0297	23.6167	23.8719	22.9704	21.5573	21.5319	26.0117	21.8512	22.259	19.8831	21.6582	25.9455	25.4059	25.2119	24.6231	25.2575	25.5649	25.4583	24.6433	24.8733	25.2898	24.6618	25.2605	23.9931	24.7986	25.3123	25.2406	25.4444	25.2544	25.3677	25.3892	25.7179	25.791	25.8156	25.9457	25.308
SYN1	21.2297	20.9286	20.5379	19.9896	19.4203	20.3766	22.9092	22.4865	22.703	20.8769	20.6847	20.2028	21.7843	21.9031	22.2164	22.056	23.3754	23.0386	22.5537	22.0887	19.7369	21.2849	22.7424	23.8483	23.4243	23.9893	24.9295	21.6955	23.7796	20.5714	24.4169	22.3082	22.6301	21.9834	25.1516	23.7205	22.9805	22.8894	23.2681	23.2125	30.2123	30.4931	30.0135	30.0142	29.7114	29.4902	31.4104	31.3501	28.1928
KAPCA	28.1485	28.2116	28.6055	28.4202	28.5291	28.6943	28.3136	28.7632	28.1237	26.8987	27.8048	27.2741	27.9328	28.2653	28.2378	27.9971	26.6228	28.2648	25.9168	26.4101	24.2632	24.8702	21.5489	26.5322	28.4353	29.8543	27.979	25.8797	28.1382	28.7875	28.9321	27.9023	28.3395	28.6824	29.1119	29.9474	27.5795	27.3426	28.1506	29.031	28.6914	28.6663	29.2871	29.2628	29.1718	29.0398	28.8513	28.6791	28.5873
CAN2	30.7026	30.676	32.7575	32.4899	32.2363	31.9746	32.638	31.4196	28.4495	30.1554	31.8057	31.9589	32.3171	31.6033	32.4519	31.3844	28.2759	29.0356	27.5578	26.2958	28.2854	26.2899	28.3405	29.0794	30.839	28.8337	31.2746	30.6844	30.7031	28.215	29.226	30.7329	31.0219	28.5507	30.2817	28.995	30.7778	29.6432	30.9332	28.6562	30.1616	30.8143	30.637	30.9472	31.354	31.3516	30.5951	30.7607	30.3048
DESM	20.1198	21.8295	22.538	21.9294	20.3425	21.5213	21.4606	20.2844	23.844	24.1335	22.8024	23.8296	23.0606	21.0645	20.6906	22.0237	27.5228	24.0002	21.1794	23.6031	20.7893	20.1272	23.1516	24.5113	23.2648	24.358	22.8122	23.8366	25.464	22.5969	21.7074	20.3356	21.5779	29.407	22.4326	27.9967	19.7396	25.1151	22.4616	22.6515	28.769	30.7049	32.6174	33.3652	24.7274	26.2491	25.9825	25.5689	28.2068
NEUM	22.478	23.646	26.1954	21.5814	21.8573	18.8903	23.4221	25.6384	28.6583	28.4092	30.6273	28.9922	28.0464	27.9095	29.1275	27.4908	30.9136	31.2088	29.7439	29.9593	29.2163	29.9728	30.4946	28.5936	25.5503	26.2227	25.6048	20.2082	29.3929	24.6973	21.891	26.3156	22.0342	24.1728	26.3447	25.6724	29.5013	29.004	28.9053	24.7014	30.1225	29.5074	29.5688	29.7228	27.9798	28.3858	27.9789	28.3448	28.7215
EGLN	32.3447	32.5745	30.7758	28.6769	31.0072	30.3396	30.9593	28.8869	27.3838	26.4821	25.9125	26.3867	28.3227	26.7851	27.597	27.1766	24.4842	24.4303	24.2339	22.9019	24.5543	22.0898	21.5315	20.76	25.8586	25.033	27.1984	23.2734	27.8108	26.7312	25.1168	26.0659	21.3343	21.8337	20.3605	23.3122	27.8412	26.7058	28.6507	27.8089	26.0688	26.391	28.6841	28.6994	27.1253	27.1169	27.5754	27.5331	23.4459
DDX5	29.001	28.7567	27.1357	27.2788	27.9397	27.4695	27.0334	25.6059	28.7571	28.067	26.3061	27.6939	28.9601	28.5623	28.0443	28.0409	30.023	29.6634	21.2746	27.4053	29.7744	30.5164	26.9311	27.8172	31.3387	30.2846	28.7732	28.4673	30.7406	30.3305	28.2668	28.7735	28.502	27.3587	28.3165	27.5042	30.38	30.3226	30.3952	29.7291	29.283	29.3461	29.2819	29.4253	29.177	29.1227	29.4266	29.3769	29.7955
PFKAL	30.3769	29.9806	30.638	29.9015	30.3271	29.7713	29.6879	29.3461	29.2504	29.0774	28.7914	28.4259	29.3308	28.5823	29.9537	28.7571	28.0695	25.6004	28.1092	27.0684	25.5691	27.3112	27.9697	27.8956	30.2115	28.9951	30.5008	30.8906	29.5335	26.7801	30.1325	31.2993	30.5538	29.7749	29.6642	30.3922	30.226	27.2442	29.5929	24.763	29.6697	30.5649	30.5875	30.8046	30.8413	30.7372	30.6844	30.5891	29.7164
VGFR1	19.2251	21.7472	19.5566	20.2351	21.1002	21.4936	19.8383	28.534	22.8134	20.7108	20.2517	21.5628	21.2626	21.2835	21.1149	19.3735	32.9667	30.8808	32.3905	20.0513	20.3304	20.6215	20.9917	32.6635	29.0524	29.6692	21.3721	29.7703	31.5015	27.8994	20.6872	21.3449	33.2046	21.7214	22.1667	20.4482	20.89	21.923	22.2648	29.7266	34.0426	34.0342	34.2224	34.1112	33.9212	34.1129	33.8481	33.6498	34.269
PRS6A	30.1107	30.1935	29.3617	29.1672	29.4468	29.2088	29.7476	29.3316	29.8194	30.4013	29.948	29.6186	29.8267	29.6943	28.2636	29.4543	29.1389	29.1929	27.6852	26.983	28.9889	28.8027	27.1965	27.2448	29.8701	28.9814	28.7273	27.7731	29.0185	29.9097	27.9344	27.9085	28.6404	28.4924	27.6216	24.2616	29.5039	29.36	29.3717	28.7136	29.2022	29.2682	29.3784	29.3213	29.2847	29.5306	29.5792	29.6687	29.1868
TCPA	32.2199	32.02	31.9321	31.4746	31.8236	31.7766	32.0345	30.7947	30.8199	29.0931	31.6025	31.4293	31.5338	31.6842	31.2898	31.4029	30.1157	30.8142	30.1945	30.5554	30.9947	31.1233	30.3395	30.0738	31.29	31.5245	31.2828	30.6574	31.6434	31.0846	30.9753	30.9822	31.0083	30.6258	30.9497	30.3632	31.2408	31.7801	31.5092	30.2681	31.5981	31.699	31.3063	31.3442	31.2728	31.4164	31.8707	31.8932	32.1981
PTN1	28.0812	28.3544	28.6371	28.2142	28.6866	27.9925	28.105	27.6923	27.9878	28.1014	28.2761	28.2374	28.0466	27.4352	27.9431	27.5021	25.0525	25.1641	24.356	23.7432	23.0191	24.3072	23.9546	22.8933	26.8206	26.5386	24.2239	25.3428	27.6966	26.2732	22.4012	25.3993	24.712	25.2169	23.4243	23.0346	26.9627	26.4777	26.7356	25.3986	26.9286	27.4058	27.3409	27.568	27.0511	27.022	27.3867	28.088	27.8529
IBP2	27.2512	27.1592	23.865	25.122	25.481	26.3622	25.2701	26.0578	25.2618	20.989	22.4327	21.8137	22.0383	19.6248	23.0552	20.2564	20.4493	19.2096	20.9217	20.0665	22.1978	21.6835	20.3858	20.7708	21.5364	23.9579	22.8726	23.8385	20.8247	22.4258	21.4028	21.2597	25.8096	21.9186	20.2655	20.2259	20.7869	20.347	21.3758	20.4139	19.8295	24.8853	21.5304	21.1505	21.6662	24.3181	21.1838	24.5171	26.2113
ARF4	28.9196	28.3724	30.5058	30.5841	31.6126	31.1425	29.9923	30.6351	25.4679	26.495	27.4377	26.4532	28.8158	27.2071	29.6344	28.4688	23.4442	23.069	21.4597	21.6415	19.2287	23.0039	23.747	20.2368	29.9721	27.7061	27.8629	27.7512	26.3482	27.5116	22.2187	28.3258	26.2928	24.1623	24.8969	21.6446	28.1039	22.901	28.0832	23.9375	28.983	26.3	28.34	27.5313	26.4906	27.9282	28.5275	28.5591	29.0909
RL7	30.4992	30.5344	31.4173	32.1871	30.6628	29.4404	31.5424	32.7005	27.8401	26.6224	29.1376	27.96	30.2303	29.8962	30.1084	29.3072	29.2371	27.3071	26.9425	26.949	30.0549	31.4023	28.333	25.6971	31.9932	30.6935	29.3986	28.954	31.4949	31.6174	27.0016	29.476	27.4223	28.7356	29.0034	26.6706	30.5769	29.8887	30.9679	31.3652	29.7734	28.867	30.0225	29.7323	29.68	28.8829	30.143	30.2365	30.7766
LBP	25.4588	25.7005	22.6095	20.7532	20.4267	22.7986	21.3361	22.597	25.4927	25.9931	23.0262	26.2521	19.2257	27.9787	20.3841	23.5806	20.3927	20.2056	24.9647	25.0524	25.9141	20.5345	24.5356	24.4782	22.4595	25.3982	24.447	21.5659	20.5984	20.5735	30.6536	26.9964	26.0179	27.0899	25.204	25.3651	20.9335	24.4947	24.285	21.2998	27.6611	26.8971	25.0041	23.531	27.1336	27.3336	27.3196	27.487	27.1446
PTPRA	24.18	25.8015	24.4687	23.8277	25.3645	25.7506	23.7459	25.9992	24.0112	25.213	25.1445	26.0055	24.5395	26.0516	25.0415	25.9486	20.8931	21.057	24.9036	24.2244	21.041	20.3407	23.9554	21.8233	20.7899	25.0202	24.1339	22.1171	24.8421	25.2939	24.8421	25.281	24.9553	25.8186	25.686	23.5883	21.4437	26.2131	26.5194	24.5194	26.1316	25.6391	25.8274	27.0669	26.2786	26.0306	26.6174	26.685	24.3185
ARY1	24.86	21.1457	25.3354	24.9042	23.6914	22.7377	24.9345	23.7721	21.9285	21.2989	24.5575	24.5594	24.4546	24.3709	23.5041	24.8817	20.1929	23.6863	20.4685	21.0833	21.1068	23.0148	20.3126	21.31	24.0212	20.3053	19.3884	22.2256	21.2187	22.4917	20.4871	20.3053	20.822	20.4923	21.2063	20.0837	21.4964	21.6955	22.9209	21.7606	21.1551	24.89	21.4335	21.0957	22.8475	22.9741	24.1562	24.2831	21.4749
PACA	22.3664	20.8646	22.0806	23.0993	21.1593	20.6387	19.2503	20.64	19.5823	23.3972	21.3751	24.0536	22.6222	21.0576	18.6008	23.8759	21.3658	21.7082	20.858	22.3052	24.3939	22.1979	20.3275	21.1155	20.9961	21.5162	20.5467	20.7307	20.1351	21.1356	24.0041	20.2914	20.8239	21.998	21.0202	22.5604	23.2721	22.2406	20.755	19.7975	24.8305	23.8748	21.461	20.9712	23.64	21.4248	28.6448	26.5605	21.9361
RL17	30.5918	30.5511	30.4572	29.5287	29.0341	27.1291	28.9233	28.0109	27.7638	29.93	28.8145	28.3767	29.8581	28.1606	29.8082	29.873	29.8525	29.8819	27.4237	27.9509	30.4111	30.4282	28.3415	28.4635	29.9628	27.2398	28.2368	26.2471	26.7538	29.0073	27.4409	28.1276	28.3358	27.1425	28.4296	27.2165	29.9446	28.5025	29.0477	28.6357	29.5922	30.0282	30.3624	30.3444	30.2064	29.7343	30.685	30.382	30.1099
PGAM1	32.4156	32.4093	33.1155	32.6797	32.6781	32.7769	32.2514	31.8685	31.6281	30.9019	32.7285	30.4998	32.5515	32.9787	32.6441	32.4925	30.9038	30.4775	30.5204	30.7059	29.1667	29.4339	30.4258	30.6096	32.3033	31.713	31.7668	31.1678	32.434	32.1424	31.6134	32.5183	32.3628	31.7255	31.4268	30.4504	32.0863	32.2734	32.0342	30.8507	32.4538	32.5822	32.1122	32.3507	32.1145	31.9604	32.5894	32.347	32.3888
SDC1	24.9644	21.04	20.4054	20.531	21.6399	21.7742	22.5492	21.0191	20.7004	21.8453	19.9072	24.4822	20.3969	22.454	21.3672	21.7207	21.2896	21.11	20.0456	19.9245	20.4498	19.245	23.7457	22.2498	21.1399	20.5498	21.187	20.8735	20.3324	22.3228	21.8427	21.3938	19.3976	21.5372	19.5445	20.8094	22.3627	22.4084	21.1935	21.3854	26.7778	26.6158	19.962	24.4372	24.543	23.8617	24.5561	24.7499	26.4611
XRCC1	25.292	24.7752	25.1035	25.3313	24.3141	24.0756	23.6824	20.3386	26.6096	26.5271	25.379	23.8116	24.9029	23.2035	25.6168	24.3352	22.7601	20.6948	20.5227	19.8699	23.8629	21.1128	24.3203	23.1218	25.219	26.3057	25.1312	24.8582	25.3255	26.0136	21.3225	24.2466	24.8931	25.4634	22.9333	22.6108	26.0724	25.0096	26.3017	26.2438	25.1135	25.098	25.6728	24.639	25.3727	24.3352	24.6695	24.7433	25.5239
AMD	23.2542	19.3042	21.9067	22.6861	24.644	24.7229	24.2055	22.4403	23.6646	22.5542	19.6831	22.6107	22.4164	23.13	23.1632	22.5201	21.9175	23.308	20.4895	20.7279	23.3781	20.4595	21.32	22.0619	21.4673	22.5282	21.5906	20.8507	21.2963	19.592	22.109	21.6146	21.7508	20.9423	20.8476	25.5164	22.411	22.6865	21.8297	21.6793	26.6761	27.0571	25.6999	25.7074	20.0869	25.5215	27.465	27.6754	25.822
CADH2	24.3209	23.6505	27.9763	26.2029	27.9338	27.3319	27.216	26.6589	23.8582	21.5533	26.0676	25.9768	26.9316	26.2654	25.9111	26.0718	22.2843	22.7162	23.4635	24.268	21.7749	21.5246	23.6619	23.0857	26.5579	26.5249	24.773	23.1458	20.9457	26.5599	24.9143	23.964	26.2649	26.3879	26.1862	25.2519	25.6483	25.4533	24.329	24.7593	28.3815	28.8824	28.0303	27.8777	28.3132	28.2662	29.113	28.9856	28.7998
GNAZ	21.4783	20.5855	24.934	23.4509	21.1534	20.3651	19.9228	23.2246	21.8431	21.4604	21.7114	21.023	19.8282	22.2093	20.8892	21.1318	20.5841	24.1472	22.0721	24.4385	23.2372	20.7744	24.1383	23.536	25.5345	27.3177	28.1179	25.0392	23.5812	25.0699	24.7368	24.4672	27.0894	25.3313	25.6919	26.0478	25.8153	25.3432	26.1428	25.5964	26.1117	27.8796	25.472	27.0756	25.5792	27.1087	27.5943	27.7252	27.6807
ML12A	31.2694	31.1842	31.0824	31.2245	30.7588	29.2455	30.4858	29.7053	29.3633	30.3032	29.5184	29.9289	29.9915	29.912	29.9694	27.5538	28.7152	29.127	26.2683	28.2323	28.3149	28.4629	26.7167	29.1665	27.8667	27.7636	28.9353	29.2807	29.2019	29.2173	28.5829	28.5629	27.6082	28.3548	29.0073	29.0881	28.9066	26.8534	27.7607	28.5318	30.6383	30.5637	31.2456	31.3498	30.3842	30.3238	29.7946	30.268	29.8628
PLCG1	25.7695	25.6512	26.7131	25.6558	26.3097	25.6607	25.9643	25.2974	23.5854	24.9284	25.9405	25.0723	21.2145	22.326	25.1578	25.2857	20.763	20.0916	24.1566	22.6369	21.7823	22.8626	22.7606	22.1308	24.5496	23.6541	24.4992	23.5072	24.1951	23.988	23.8166	23.2258	23.7023	21.1705	22.6606	22.2435	25.3236	24.2125	23.6057	22.2073	26.6299	26.903	26.6518	26.318	26.1261	26.1837	26.5743	26.7188	26.474
LFA3	21.584	19.0395	25.4903	25.7293	25.2213	25.5654	26.1968	26.0931	20.5129	22.5793	26.161	27.6755	26.6686	20.8312	25.9563	27.1705	26.9148	26.3488	25.982	25.7809	26.553	26.1676	26.3607	24.9316	25.3673	20.7257	25.2357	25.962	25.2326	25.6098	26.7796	25.9611	25.0621	25.6298	26.3124	26.4665	26.0428	26.1745	25.8337	26.3946	25.7924	25.9613	25.9381	25.7579	21.9682	25.3595	24.5848	21.5235	25.9469
RPAB1	25.9371	25.8043	24.7451	23.4558	22.8118	22.6671	23.3846	24.2061	26.0727	21.2002	23.6439	25.6669	25.3017	22.9052	23.9747	25.3676	24.1523	22.4127	22.3468	22.6127	26.1637	26.3985	23.731	19.1139	25.4273	25.3409	22.3581	21.2022	23.1004	25.8065	21.8662	20.7574	19.7658	22.4071	23.9834	21.2697	26.1761	25.6411	21.6942	20.4503	23.6043	23.5627	24.5057	24.5385	25.2691	25.4095	25.7589	24.5029	23.821
GGT1	25.7163	25.8467	23.7634	21.8433	20.7265	22.0114	21.034	21.5365	24.0896	24.0353	29.8398	22.2299	21.4242	21.1861	23.493	24.3941	24.4894	20.7136	25.119	24.5329	22.1762	22.1764	24.9504	24.6596	21.3873	22.0849	24.7567	21.9183	24.645	19.9628	20.7979	25.7824	24.1996	25.3065	23.9146	26.5367	22.1045	29.3117	19.5608	23.634	29.8252	29.0904	26.6853	27.0628	26.8251	26.1312	25.9713	27.3591	29.4333
RO52	25.0912	24.9421	26.2606	25.6873	25.9437	22.6195	25.1712	23.0749	23.7562	23.5722	26.7914	26.4993	27.9477	26.2467	27.2039	23.9673	21.6072	20.4098	21.4916	20.2535	24.3585	20.7194	20.4789	25.1902	22.9725	22.6043	20.2721	20.3262	22.4606	23.1594	20.8509	21.3383	22.0488	22.7078	26.5176	23.8393	25.2676	24.8502	23.6583	21.6077	24.5854	26.6814	22.2687	26.114	26.6255	26.6246	24.8088	26.4829	24.4373
E2AK2	26.3106	27.2439	27.3204	27.4065	27.5917	26.346	26.311	25.9918	26.4319	26.8801	27.4873	26.8326	27.7982	27.2721	27.5264	27.7276	24.7962	22.1339	23.7731	24.2024	23.0247	22.0696	23.9565	21.8516	27.42	27.4648	27.1861	24.1463	27.5911	27.7854	25.8532	26.8566	27.375	26.3787	27.1133	25.5119	28.4748	27.3439	27.7457	27.7062	28.2847	28.3876	28.5862	28.3217	28.4965	28.4062	28.4355	28.2075	28.8637
CSK22	27.0262	26.9416	27.2613	27.1869	27.0409	26.5027	25.732	23.1266	26.1181	26.4554	27.9545	26.5735	28.2447	25.8072	27.2716	26.3934	26.0218	24.2244	24.6773	19.9118	20.7597	24.0403	24.0505	21.1551	28.5063	27.7332	26.4914	25.2236	27.4591	26.7961	25.0535	24.0008	25.8782	23.7763	22.524	25.331	27.7336	26.6529	26.958	26.3059	26.8345	27.1249	27.1902	27.0933	26.9458	27.5923	26.4492	26.4835	26.8025
ITIH2	21.8878	21.4436	20.4896	20.9573	19.4417	21.391	18.0183	20.6534	21.3168	19.4117	22.7272	21.822	19.568	20.9087	19.6702	23.8607	19.7851	21.6556	25.7122	26.9038	22.4613	20.7676	27.0088	27.5383	21.3631	20.6404	25.8241	24.6883	20.2367	23.6802	25.9166	26.6687	29.2801	27.3399	28.309	27.196	21.8073	22.1205	23.0085	22.5822	30.6958	29.7952	28.3579	28.1711	29.2085	30.3689	29.5043	29.8597	28.55
ITIH1	22.7014	22.2232	21.1495	19.8671	20.3365	21.2275	19.7937	21.715	22.3678	22.7351	20.511	21.7758	20.0332	22.0353	22.2568	22.9544	22.2519	21.937	31.0664	30.8658	18.3125	19.7711	29.1146	31.3101	21.0044	21.5809	30.2691	28.9347	20.8148	18.6332	26.2924	29.8806	34.4911	33.0695	33.2028	27.8808	20.7895	21.5047	19.1682	19.6652	33.0762	33.0527	31.19	31.1938	31.9106	32.0797	31.8671	31.8098	31.325
TYPH	29.4169	29.5481	26.5244	25.6921	28.481	27.7664	27.84	27.144	28.6472	27.4868	28.2165	27.2832	28.2964	27.5147	29.5151	29.1263	29.3688	28.4171	27.1107	27.3179	28.91	27.2292	25.5774	25.3807	27.4552	23.5901	22.2421	21.3502	27.2811	25.001	20.7403	22.003	26.5379	24.6504	23.4638	24.1555	27.9593	27.8693	26.7159	24.5584	31.0371	31.0923	31.2534	31.487	30.5503	30.7473	30.9684	31.4006	29.4042
AT2B1	27.3807	28.0346	31.0515	30.9169	30.6216	29.8856	30.903	29.6961	28.0564	26.819	27.7648	27.681	28.7327	25.8665	28.4401	27.678	28.5611	28.765	23.9955	25.9351	27.6868	27.4284	23.7478	20.8918	27.5933	24.2467	27.6328	26.5529	26.1621	26.4112	24.8431	26.8168	26.9183	26.8293	27.4436	24.601	26.568	25.3181	26.6464	24.6103	28.2203	27.6871	27.9902	27.5819	27.1338	27.9777	29.2585	29.4201	27.6781
DPA1	25.0316	25.7794	20.2947	19.9679	21.1624	21.2127	20.7529	19.9766	20.6743	29.5448	29.055	24.6057	30.4474	25.2326	32.0773	30.2203	28.1748	27.9753	21.4905	21.3606	24.4088	22.4458	20.973	19.704	27.7956	25.8062	26.7008	26.2937	28.4455	21.1123	21.3584	28.0793	26.2915	26.7622	27.2043	23.2492	28.9957	28.0069	28.5848	25.4018	28.249	28.4871	28.7295	28.9106	28.954	29.0878	30.2222	29.588	27.1077
IF2B	29.1837	29.7118	29.9466	29.3235	28.417	28.3903	30.2611	29.1313	29.3823	29.3312	28.7385	28.8241	29.3541	28.4267	29.34	25.2447	27.9058	27.9291	25.7796	25.8129	27.2688	26.9693	26.3825	26.004	29.4058	28.1569	27.8498	25.1888	29.3786	26.7442	26.7153	26.6377	26.8214	25.8495	26.491	24.7651	29.1467	28.4842	28.8219	27.2122	28.0269	28.1556	28.5081	28.4717	27.838	28.4138	27.9241	28.1999	28.2029
TRYB1	28.5543	28.2536	22.006	25.5113	22.5375	23.6217	24.5399	25.4398	25.734	26.883	30.0181	26.9257	30.8383	28.3863	27.95	26.48	26.4752	26.2284	26.2441	28.2227	23.9063	26.0146	28.8566	28.655	27.5554	25.7307	31.1521	29.0484	30.6832	29.1883	28.9734	31.6743	32.4701	30.573	31.687	29.7848	29.5512	28.5484	29.1413	26.2305	28.4421	27.0111	31.5831	30.9005	27.9268	25.3051	26.2537	27.0868	24.2328
BTF3	27.2211	27.5649	25.8067	26.434	25.6961	26.3815	26.7184	26.0599	25.4484	26.0568	23.9048	25.2085	26.2222	26.1606	25.293	25.7688	25.6586	26.5452	20.6384	27.6421	20.004	23.0714	20.044	20.614	27.4108	26.6999	19.5844	20.4839	24.3361	22.001	20.8462	24.1957	21.8658	21.6709	21.8394	19.9728	25.9314	25.8541	20.2703	20.9584	21.3338	25.9655	22.2291	24.0855	26.3783	26.6763	27.1771	27.651	22.0789
RAB3A	21.556	21.3263	20.4059	20.7491	21.0896	22.8984	23.8983	21.443	21.3797	20.5642	21.6076	22.2921	20.5662	22.2474	20.6195	26.5008	20.5949	24.3857	20.3695	21.1496	19.9386	19.9511	20.4125	20.4301	26.0343	24.1342	25.0365	22.8194	25.5253	23.3717	24.9944	25.2855	25.5075	21.9996	24.5805	25.2533	24.6618	21.521	24.17	24.105	26.1498	26.1425	25.4565	25.5742	25.2256	25.201	28.4627	28.7403	27.1099
RAB4A	23.8212	24.6334	25.1271	24.3847	26.0466	25.1538	24.9648	21.4867	24.6484	23.182	23.993	25.267	25.7421	25.2139	25.3985	22.7714	19.1998	20.1785	20.3485	19.5975	20.417	20.4268	20.1764	21.4394	26.1584	21.9639	25.053	21.4701	20.9203	24.9527	23.7279	24.4199	23.7897	24.4616	20.9177	25.1497	24.2446	21.4435	22.0408	24.4658	24.482	26.5951	25.2228	26.0017	24.9619	25.2922	27.1806	26.5831	26.0134
RAB5A	21.2506	21.23	26.7003	25.0442	27.165	25.8939	26.0452	24.6383	24.4158	24.712	27.0077	27.0789	27.334	27.2338	27.3402	26.2039	20.9046	25.8496	22.2689	21.4575	20.9684	20.9752	21.5907	20.3391	28.3243	26.2084	26.0966	26.5568	24.7181	23.557	24.1129	26.5959	26.5209	26.8078	24.2701	21.0138	27.2887	25.1106	26.0474	24.7632	27.1588	27.6701	27.4589	27.525	27.5858	27.8143	27.852	27.8835	27.0534
RAB6A	24.8064	24.2359	30.5828	29.536	30.1935	29.8612	29.6553	29.6627	25.4818	25.775	30.0258	29.7471	30.3336	28.7493	29.8922	28.751	28.1993	28.5422	23.6829	26.7363	24.4757	24.1319	27.2887	28.7944	30.8277	28.3204	30.4871	27.717	30.5045	29.1256	27.6099	30.2265	30.6462	28.8787	30.4617	29.4921	29.4169	28.908	30.0469	27.7568	29.9302	29.7432	29.3558	29.3636	29.9422	30.2501	30.1984	30.28	30.422
PRVA	20.9253	24.6897	20.1916	21.3112	20.2287	21.0465	19.6876	21.1812	21.1084	21.0484	21.5216	20.1239	21.61	19.3342	18.6885	21.0181	25.3751	24.7717	25.7355	20.1583	20.855	20.8624	19.8655	20.1362	19.7906	21.25	26.2785	26.5636	24.6263	20.8742	25.9697	26.8142	22.0722	20.3982	25.346	25.4649	24.6877	20.2378	24.8508	24.7991	22.4605	20.5751	20.9168	21.7961	20.3007	21.3664	22.5324	22.5289	20.5708
MX1	21.9214	20.9515	17.3937	18.8765	18.7268	20.869	19.6504	17.9022	24.6448	25.3691	22.8668	24.8949	26.5042	26.9773	28.0436	26.6838	20.5916	22.6954	17.589	18.9536	19.3091	19.325	18.9896	18.205	21.2514	19.302	19.6899	20.5414	20.6264	20.3187	19.2085	17.9549	22.7836	22.3029	19.1818	21.0488	28.732	27.0543	20.3647	21.0512	29.7517	30.1099	29.3268	29.6204	28.4942	28.1001	29.971	29.9297	31.2173
MX2	21.1009	19.0896	18.7408	24.9566	20.7147	24.5032	21.3934	25.2283	21.5429	22.9114	20.3949	24.8364	21.545	25.5203	23.8174	21.4891	20.1898	21.6934	20.2766	25.4984	21.2609	26.3876	27.2104	28.2183	19.5122	21.3022	23.9348	25.2909	23.2631	24.2127	23.8411	19.8549	26.2171	25.5582	19.4349	19.7314	24.757	25.2396	22.6953	20.9402	24.5824	26.4784	27.1066	25.734	24.7417	23.9192	25.0779	25.6163	26.6345
PSB1	30.3441	30.3031	30.4123	30.1958	30.192	30.1905	30.6616	30.5985	30.3085	26.7387	30.9218	30.6055	29.9766	30.2334	30.3578	30.082	27.7887	27.7151	21.8021	26.517	27.1493	27.5494	27.333	25.2165	29.868	28.8699	28.2556	27.7087	29.9813	28.8157	28.8197	29.2033	29.2148	29.2677	29.3766	29.3279	29.6028	28.9398	29.1416	30.2508	29.1989	28.8561	29.3932	29.8585	29.5913	29.4526	29.6821	29.6651	29.1724
MPRD	27.3461	27.5547	27.4036	26.4969	27.6328	26.6396	28.187	21.2074	28.1809	25.772	29.3781	29.3062	28.7923	24.8976	28.23	27.8657	25.2867	26.8235	23.6282	21.6013	27.1932	27.2721	24.0751	25.97	27.7787	27.3563	25.7184	25.4713	27.9165	26.6559	26.3411	26.1773	26.506	21.8884	25.2723	26.41	27.5779	27.9242	27.2086	27.309	27.2655	26.7108	26.8425	27.0976	26.5214	26.1171	25.9142	26.5995	27.6182
COX5A	28.0861	25.5836	28.5399	25.8467	27.9154	24.9821	28.1923	27.3382	29.196	25.1189	28.2662	25.0286	28.2053	27.8957	28.6164	27.9116	26.699	26.4696	26.2529	26.2983	24.4282	24.8351	26.1509	25.9901	25.9083	25.0741	28.2559	25.9841	25.9911	27.2889	27.5475	26.7528	25.5647	27.7417	28.3836	25.0763	28.1237	27.8545	28.2371	27.8455	29.0976	29.154	28.7943	28.7154	28.4852	28.7863	29.1661	29.2134	29.3906
LMNB1	22.6229	21.274	20.477	23.0301	21.9663	23.4539	23.3457	24.7958	24.1227	24.6957	24.0551	25.0277	27.4927	26.7535	26.2089	26.1852	28.1928	29.1947	29.0814	29.4758	29.9917	29.3118	30.1247	29.9869	28.1748	27.6574	28.1804	26.5038	29.7837	28.6722	27.4934	27.7659	28.153	25.9896	27.833	27.0012	29.1793	27.6993	29.1791	28.3183	29.6805	29.1039	31.3507	30.7167	29.6266	30.2404	30.5137	30.525	29.7848
ITAL	20.573	21.178	19.6463	20.068	20.8054	20.6579	20.1493	21.8937	21.3462	21.1786	20.6791	21.3752	19.3838	20.976	20.3628	21.8941	21.6835	20.7723	21.2667	20.3297	20.1017	20.1552	20.5119	22.0804	20.1642	20.8217	20.8789	22.6619	20.9788	21.9812	21.2145	21.0253	20.6113	22.7426	21.167	20.3713	21.1051	21.4278	21.4428	21.3641	21.808	21.9086	23.7097	24.086	22.5185	22.7022	24.512	24.2042	22.55
DDC	20.6994	19.5872	20.5802	20.9114	20.8681	23.1374	19.6111	20.8732	26.0391	21.7409	19.1127	21.2735	20.9675	25.8063	18.7226	22.725	20.5487	23.2271	25.6004	19.5717	22.4368	26.6683	25.3814	24.9932	21.226	26.7083	23.0041	25.4312	20.44	27.1682	28.2382	20.1622	23.2763	26.1617	23.4726	22.8172	21.8892	22.4154	20.4865	27.0086	26.6287	26.267	26.4936	26.2485	26.9024	26.917	29.0805	28.0135	27.0905
PZP	21.6439	20.8094	25.3631	21.8237	23.5045	19.9921	21.6667	20.3472	22.8907	21.4817	20.9803	25.0036	20.2615	20.6835	21.0941	25.348	21.0889	20.9933	25.763	25.5236	21.6154	20.9821	19.8697	18.9891	20.343	24.9462	20.9393	20.7922	20.6604	20.2912	21.4057	20.8912	24.1402	26.2273	23.6339	22.6887	21.4398	24.8378	21.9057	24.3376	21.3217	24.6342	25.3141	21.3152	24.9871	24.9442	25.1935	25.9237	24.392
ICAL	30.4902	30.5758	30.6028	30.2879	30.4589	30.4764	30.7953	29.8338	29.6291	29.9997	30.4557	29.4533	30.7717	29.736	30.5424	29.6064	28.4954	28.9967	28.8366	28.2477	29.1366	28.1959	27.8126	29.5158	25.8158	26.2204	29.6134	29.7083	28.288	27.7014	28.9909	29.5252	30.3157	29.3895	29.289	28.1493	29.672	29.2248	29.3003	28.7233	30.2679	30.3645	30.5892	30.7947	30.1257	29.8026	29.839	29.9249	30.4319
CO5A1	26.8203	27.14	29.0183	27.5078	30.14	28.1436	28.3449	22.1308	24.3147	22.1584	23.251	24.1239	24.5041	23.0023	20.111	24.4878	26.1576	26.3369	24.8232	26.4887	23.2124	23.6093	27.8704	21.788	25.2221	22.7126	23.6853	22.5391	26.4434	26.3813	26.2262	24.0924	26.3415	23.2267	28.4884	22.7176	24.5068	22.6461	27.4639	23.3099	27.3611	26.8674	28.1775	28.7895	27.1156	26.0612	25.4065	24.9776	28.0945
MAG	20.9749	21.0367	21.442	21.4202	19.6928	22.5018	21.6553	21.4591	24.9527	24.7071	21.1826	21.657	21.6893	21.7944	21.3979	21.1778	27.5588	29.3876	27.7808	29.3736	29.0755	28.492	31.0728	30.2134	29.2997	29.3992	32.091	31.4114	31.1399	30.3032	31.9466	31.6016	32.1515	30.9073	31.5109	29.2357	30.6295	28.1536	29.5647	29.7979	19.5119	22.0392	20.5362	29.637	20.1952	29.8899	29.606	29.3169	21.7745
ASPG	24.2122	21.5402	25.775	25.6614	26.8369	26.4588	26.6002	26.9147	23.8643	24.7989	27.6785	27.4728	28.5695	28.7635	28.3677	28.854	25.9864	25.7222	20.155	24.3456	22.182	22.1831	24.0882	21.3755	21.1823	23.2057	20.6107	22.0751	20.0244	24.9181	22.1076	22.011	20.6165	21.2375	19.72	21.5539	26.036	21.0585	21.2633	23.061	21.0296	25.4783	25.4983	24.9471	24.7851	21.5298	25.5979	25.2357	25.6144
RASA1	24.3989	25.1128	25.8118	25.9404	25.1542	25.5457	26.1648	26.6039	25.9786	25.8832	24.2252	25.1458	25.393	25.2516	26.664	26.5219	21.7197	24.046	23.5156	20.486	21.4893	20.9266	22.0928	23.5385	26.1411	24.3323	21.7373	21.8876	25.0332	22.6296	23.7472	22.4621	23.8951	23.7621	25.1895	24.4125	17.916	20.847	24.5029	19.8845	24.6889	26.5101	25.8866	26.6565	26.5753	26.0319	25.0012	26.4776	25.2952
CD11B	19.9496	23.4091	25.3464	23.59	23.2561	23.8749	22.0948	24.4123	22.0482	23.9179	23.0675	24.0239	22.8068	20.2819	22.8956	21.1966	19.3931	20.2073	20.44	21.8354	22.6056	20.82	20.8331	21.6401	23.8691	24.6081	23.4074	21.5718	21.6523	24.2729	20.9239	23.545	19.1829	23.6767	20.8245	20.8599	22.1257	23.2597	19.8669	23.4129	22.1886	22.8529	21.7217	25.2094	24.9465	25.4586	25.0981	25.325	23.7313
GSTM3	29.8867	29.8215	30.5442	30.1288	29.8583	27.5689	29.3593	27.7631	26.185	28.8196	27.902	27.2097	28.6135	27.0982	28.1242	28.3499	27.2993	25.4618	27.0097	25.7128	23.2947	23.5663	27.5431	27.8141	29.3608	28.0452	31.3542	30.2671	30.3508	28.2882	28.7622	31.0785	31.5427	31.225	29.8418	27.5876	31.065	29.8235	30.0527	28.6388	30.702	30.9388	30.0618	30.4378	29.9489	29.8824	30.347	29.9399	29.846
VATB2	30.4278	30.2918	29.7898	29.2183	30.0267	29.8319	29.6457	29.5065	27.8775	28.3428	30.8336	28.2483	31.084	30.7167	31.1763	29.3409	29.8339	29.9156	28.5596	27.1464	28.4991	28.5832	29.4136	29.5812	29.9129	29.115	30.4694	27.7115	30.8804	27.0411	27.7793	31.379	31.0506	30.2673	30.5043	24.5706	30.6225	30.7436	30.6876	27.5561	31.2779	31.3127	30.8102	30.8121	31.0033	30.7506	31.1444	31.0623	31.4356
VATC1	28.5923	29.009	28.5873	29.1496	28.6315	27.9854	28.068	27.5116	29.3006	27.7663	29.6843	28.8856	30.2252	29.4457	29.9276	29.1423	26.5274	27.2697	26.7821	26.4127	24.3737	26.0034	25.7041	24.1486	28.48	26.8863	27.736	29.4267	28.7721	28.3787	25.7497	29.6205	28.8679	27.0523	26.6179	24.5884	30.0926	28.7404	28.8237	26.0493	29.9154	29.9542	29.1195	29.3425	29.4008	29.5278	29.0721	29.4663	29.2952
NF1	24.213	23.8553	24.5709	24.3384	24.8532	25.3013	24.7006	24.8167	24.7934	25.8101	24.1722	24.5861	25.8807	25.1747	25.7859	25.2559	21.6839	24.1235	20.9257	24.9635	19.5859	21.4932	25.7026	24.8841	25.8043	26.6143	25.2752	26.5573	25.8618	22.1675	27.0147	27.0183	22.5993	25.735	26.8318	24.9934	25.0632	25.6265	20.6046	24.7567	27.2911	27.2165	25.9152	26.3251	27.8483	26.362	28.559	30.2628	27.6544
AOFA	21.9013	22.7811	21.0109	22.3037	20.5118	21.6517	22.5456	22.648	24.5746	24.7164	23.6998	23.6965	26.837	25.8181	24.2838	23.3553	18.0105	19.628	21.0342	21.5849	21.8869	23.5816	21.3345	22.5073	23.9422	24.0851	29.3442	24.5104	24.3497	23.9796	26.5772	27.6269	29.6106	24.4667	28.4815	26.5675	29.0481	24.9728	27.0967	25.8314	31.1886	31.4716	31.8588	31.9648	31.0664	30.8199	31.59	31.3189	29.0058
ACOC	28.3517	28.3968	27.2731	26.7013	28.4411	27.868	27.8458	27.4551	28.1183	27.1781	28.3665	27.6529	27.9313	26.684	27.6211	28.2596	25.1699	26.7111	25.0661	25.8185	25.1714	25.3915	26.6216	26.9774	28.6458	27.5121	26.6574	25.6942	27.7223	26.886	25.3013	27.8621	25.1896	23.7268	26.2854	25.8294	26.4334	23.1584	26.2696	25.7215	29.1379	29.4451	29.2859	29.5662	29.4965	29.3917	29.5138	29.5078	28.706
SYT1	20.6687	22.4044	20.9722	21.9361	19.3939	22.6716	19.9617	20.6081	21.4732	22.2634	20.1096	21.69	21.2172	22.0857	21.6747	22.7046	23.406	21.4878	20.0125	22.1015	20.8239	20.3674	20.5844	20.9949	20.8415	23.6475	24.1595	23.911	19.5213	21.6948	21.4659	23.7881	25.6839	21.958	26.1644	24.0845	23.0001	23.2988	23.3511	22.4784	29.0172	28.0704	27.898	27.6371	27.9191	28.0434	28.8847	28.4773	28.6621
5NTD	28.325	28.2557	31.3484	30.8193	30.1182	29.6424	30.4298	30.0109	25.2768	25.7324	26.2738	26.3047	29.341	29.1961	28.8895	28.3535	28.9482	29.3141	26.3985	25.9642	26.8804	28.0953	26.3804	26.9043	30.8706	29.6278	29.5154	28.7179	30.2988	29.1391	28.5055	28.6374	29.0668	28.6869	28.9019	28.3065	29.6435	29.0404	30.5583	29.8355	29.2344	29.4736	30.3306	30.3591	30.4861	30.6842	29.1983	29.1861	28.8808
ERBB3	21.4625	23.7786	19.1439	21.3932	19.9464	19.402	20.0461	20.3358	22.9948	24.0746	23.7208	25.2576	25.2445	25.5904	24.1768	25.4929	20.3929	22.8709	20.4724	19.6278	21.6577	21.0629	21.6713	22.3547	22.6878	25.1885	24.2103	25.4409	22.0031	20.2135	25.5461	23.6726	25.8997	22.137	27.2249	23.9737	24.4666	20.1134	24.5756	23.6164	26.8069	26.8153	26.4812	26.4046	26.6944	26.8287	26.6216	26.472	25.8611
CD9	27.6993	27.611	30.8871	27.0538	29.9902	27.9117	30.5092	28.8623	30.6182	30.6912	32.1883	30.816	31.9802	29.4278	30.9898	30.3843	34.2799	35.2083	34.9753	34.0946	34.248	35.1681	35.4712	35.6643	35.2286	33.2986	35.7055	34.919	34.8918	33.6546	34.4618	36.4064	36.0048	32.4197	35.9346	32.9587	34.6442	34.1785	34.8437	33.7329	31.2619	32.2893	32.0176	31.7896	32.0839	31.9365	31.0825	30.8724	31.7169
COMT	26.259	23.082	29.6891	25.9469	28.1413	27.4272	27.7095	23.2888	27.3116	27.3838	28.3591	25.8582	28.8212	27.0931	29.7577	28.0333	20.9824	21.7816	22.0159	21.0083	20.2383	19.9841	21.7558	19.7963	25.684	25.0812	26.1285	25.87	24.4521	24.9254	22.2157	27.4557	27.0806	25.9964	27.4924	19.4767	28.0143	26.1722	27.1922	23.1178	27.9136	27.5279	28.394	28.3937	29.2497	29.8311	29.2676	29.5855	26.6007
TGM2	31.5261	31.2191	29.6422	29.163	30.8857	29.9686	29.2721	28.3554	27.7751	27.9391	26.2498	26.5209	31.0202	30.7271	29.5722	28.877	28.3182	27.5999	24.948	26.6176	27.0987	27.5352	25.6254	25.038	23.3423	26.838	24.7061	24.4983	25.9148	25.5149	25.4676	24.0261	25.3639	24.2613	19.7694	21.3235	25.1338	21.817	22.9583	22.9579	32.6076	32.59	34.0799	33.9796	30.1424	30.1914	28.9996	29.0467	33.0711
MUTA	28.0984	27.4647	26.602	25.9762	26.9882	26.9392	26.9861	26.7603	26.9101	28.4918	28.4557	27.8718	28.5925	28.7211	28.7228	25.5551	26.9841	26.6827	25.036	25.5344	24.1496	23.9922	26.0555	24.6355	28.4379	27.8158	25.846	21.5677	27.6674	29.2707	26.2722	26.4201	26.3967	26.3756	27.3797	24.8931	27.5136	26.1767	28.3256	23.8242	27.4757	27.6919	27.1529	27.1691	26.7376	27.2705	28.3784	28.4088	28.5634
OSBP1	28.4154	28.4628	29.5449	28.5135	29.0252	28.7717	28.7166	28.6473	26.2204	27.7988	28.0992	28.7354	28.8501	28.8159	28.8626	28.7067	27.7296	27.7283	25.7902	27.2851	26.0444	26.8454	27.4521	22.6853	28.4381	28.5175	27.5733	27.7938	28.4991	27.0028	26.9367	27.2538	27.9072	27.9429	27.6175	27.7879	28.4343	27.3233	27.7724	28.2577	28.2997	28.823	28.1807	28.5225	28.4383	28.3078	27.9696	27.7428	28.1425
FBRL	22.2784	23.5431	20.7889	20.8165	21.1814	21.3156	20.2128	23.0012	23.3672	21.9595	19.8533	25.4763	23.2466	24.4916	19.5354	23.6092	23.3842	24.5621	23.865	22.1463	25.272	23.5211	22.4143	19.7283	28.4586	28.8118	25.5006	25.1539	27.3169	28.0137	23.7256	25.6994	26.3717	23.3669	26.4637	26.7016	27.8578	26.7798	27.5858	27.2446	27.3587	28.0632	29.2141	29.5852	28.6277	28.0623	28.9595	29.1499	27.9763
RS4Y1	22.1224	20.907	20.2253	21.7739	20.3586	21.4421	21.7649	21.0512	24.2664	21.9032	20.9836	23.7184	20.3283	20.8956	23.9729	23.6761	24.3729	24.5636	19.8413	22.8047	20.6021	20.2491	22.3138	20.5179	20.998	21.4938	21.161	21.3519	20.7676	21.6814	22.0055	22.1314	20.565	22.5675	21.9623	21.342	25.3287	22.0456	23.8097	25.1854	22.0466	24.2805	26.0809	26.3306	25.0962	25.0687	25.6731	25.9309	24.6611
PUR2	30.4501	30.4006	30.5178	29.6129	30.4171	29.047	29.7323	29.6459	29.1193	28.6389	30.0062	28.6862	30.1323	28.7716	29.5483	27.5748	27.8552	28.3321	24.1914	20.7085	29.1181	28.5521	25.4171	25.409	28.1792	28.3727	29.9844	25.9696	29.948	29.6963	27.2465	27.6591	30.6703	26.9657	27.5935	27.2152	30.5153	29.1487	29.9373	28.1037	28.6108	29.3268	29.3123	28.9741	28.9252	28.7588	29.2144	29.1369	29.1239
TENX	22.0968	20.7743	29.2206	26.8077	27.2302	24.3211	29.0002	26.2382	21.9229	22.7601	22.0655	23.1918	20.8566	21.7067	19.5076	22.5947	26.8735	28.7846	31.0107	32.2549	23.9937	24.1807	31.0352	32.1984	22.891	24.0079	34.049	32.5274	30.8355	27.7643	31.1872	33.7511	34.718	32.1158	33.6115	29.8035	23.9767	26.9316	24.2002	23.5798	32.3617	32.3809	34.2887	34.2376	32.4137	32.3704	32.9575	33.1613	34.6295
ACES	21.6063	21.2722	19.6844	22.9945	22.2818	20.611	20.4653	22.6274	20.4612	20.8877	20.0201	21.2631	19.3774	19.4421	20.2122	21.5848	21.2196	21.0999	21.6257	20.5688	22.7931	20.6109	20.2827	20.2263	22.476	21.1366	20.7477	22.1625	20.1486	22.2381	21.1441	22.9233	21.7287	21.6607	20.9058	21.453	19.571	21.3865	21.5966	20.0113	25.6015	25.7247	21.0757	22.7913	24.9543	25.327	24.8957	24.6671	25.2612
NLTP	30.1382	29.8133	30.7122	28.5693	30.8584	29.3619	29.8886	27.2283	29.7289	29.1742	30.5788	29.1582	30.9871	29.5199	30.7751	28.9453	28.8398	27.6962	26.943	25.7676	28.6451	28.4856	26.4533	27.4931	24.7424	23.6673	27.3262	25.7488	29.2932	27.6794	25.7109	27.4917	27.2097	22.2662	27.2332	27.5715	29.377	27.6658	28.5301	27.3289	28.2752	28.3297	27.6795	28.0175	28.8041	27.2659	28.9144	28.8852	27.8186
GPX3	22.0316	21.5813	20.0393	20.8383	21.2945	20.501	19.7129	21.4245	23.2798	20.4151	20.1194	22.0831	19.6781	22.084	21.0557	21.2858	20.1629	20.5738	21.5046	22.9779	21.2625	20.1438	22.3521	20.8873	21.9051	20.7952	28.2977	27.5886	22.76	21.3656	25.2138	27.2089	29.4704	26.7349	27.8351	24.8656	24.8777	25.4433	26.0972	25.8466	27.1324	27.1688	28.1717	28.2498	28.1488	28.1824	27.9849	28.5914	27.3857
NDKB	33.0442	33.4067	33.751	33.9796	34.0002	33.7204	33.7511	31.3763	31.8002	31.9824	32.6709	30.5311	33.0234	32.9916	32.7328	31.3621	31.9591	31.7963	30.9212	30.9781	31.8918	31.9435	31.3196	31.3422	30.3249	30.4559	31.7971	30.4126	32.3229	32.2169	32.0699	31.762	32.6225	31.6434	31.4536	31.1121	32.0987	32.5686	32.7174	31.3952	33.1764	33.0707	32.6212	32.4694	32.412	32.5549	32.5889	32.513	32.8874
GALA	20.6001	20.0026	18.7937	21.1077	21.9356	21.9686	21.0374	21.9482	20.878	20.8212	20.6758	21.2996	22.4183	21.8129	21.3529	21.363	24.816	24.5332	21.7636	21.0488	22.4803	20.8454	23.9388	25.3833	19.2773	21.1139	20.7213	19.6314	21.5411	21.873	22.0585	21.2235	21.6552	21.6413	20.8832	21.1175	20.9419	21.2154	19.7932	21.7521	23.6993	22.5369	21.2398	22.3922	22.4817	22.0639	26.5789	26.9328	28.6009
ADRO	26.1995	25.8159	28.784	27.8365	27.7737	26.9972	26.8381	27.7798	28.1124	27.42	27.948	27.4743	27.8274	27.5926	27.9055	27.3652	24.6257	25.8351	25.267	23.1952	23.1745	24.15	26.0417	26.5277	26.4749	26.444	27.3487	26.496	27.5837	26.8818	26.892	26.4245	25.192	25.6823	26.9192	25.8791	26.0897	26.5187	26.8021	25.0743	27.4185	28.3604	27.6841	27.5619	26.648	27.3582	27.9018	28.1839	28.7546
CALB2	23.4028	21.5474	19.9611	18.1827	24.3079	24.8582	22.8744	23.1039	25.4619	25.2962	23.6202	24.7975	23.1495	21.7178	21.6908	22.1563	24.4375	24.6607	25.9992	26.2792	24.2397	24.7359	24.0901	25.8414	23.7259	23.3162	25.0339	23.1151	23.0176	23.4782	25.0643	25.2708	20.2882	21.5098	23.8114	23.0235	22.3029	21.8208	23.4114	22.8249	29.9114	30.2101	29.6418	29.741	28.4008	28.4099	30.1126	30.4326	28.6677
CBL	25.5135	24.384	24.8598	25.1967	26.1423	26.034	25.6778	25.3718	26.6942	26.0122	26.9273	26.4666	26.8515	24.233	27.145	25.7854	23.8474	23.1218	24.182	24.1249	21.6014	20.4493	26.6395	26.1047	26.769	25.2833	25.6795	23.8912	23.1869	24.1042	25.0815	24.2541	25.4966	25.8356	24.4942	23.9452	26.1324	26.1134	25.1135	25.3542	25.8664	25.6893	26.4367	26.4617	27.0981	27.2238	27.0388	26.6199	26.3732
IBP4	28.3004	28.2675	27.074	26.8386	25.0341	25.7492	27.1824	26.8964	25.0378	24.6898	23.8596	24.374	26.408	26.2192	26.1972	26.6122	20.9729	21.7149	19.8165	20.804	23.7996	21.6048	19.8993	21.105	19.5575	22.8166	19.8667	24.6167	24.5983	22.2266	20.3459	21.0865	25.2265	24.3754	19.9722	22.2077	25.3835	25.6357	25.8615	25.9564	25.5344	26.5013	24.7425	24.31	23.2432	21.1994	22.1188	23.4414	24.8612
KAPCB	21.392	21.8523	25.4925	23.7698	25.4765	25.829	24.5029	25.2652	21.7598	21.8489	24.5107	24.9398	23.5039	25.095	24.1141	25.1835	20.4059	22.1507	20.2779	21.3036	20.1142	20.1256	23.0003	19.942	24.9094	26.597	21.5198	27.2276	21.1966	23.7404	20.1186	25.3311	24.141	20.8608	25.0779	24.4916	21.0554	21.7774	23.9724	20.6462	26.2754	26.495	26.4311	25.92	25.9317	25.8702	26.2477	25.815	26.8768
GTR5	21.1657	22.355	22.6745	21.5562	21.0631	21.7333	20.6871	22.8576	25.4046	21.0428	20.6997	22.0356	23.503	20.4142	21.1145	21.4823	20.1883	21.6972	20.8058	22.1265	21.9043	21.906	20.9541	19.8981	19.5152	20.3754	22.1467	19.9044	21.7501	20.9432	20.9379	21.0907	21.872	20.8594	19.9444	20.8214	22.0795	21.3346	23.1683	20.4869	20.0619	24.5208	21.7169	21.5172	21.4229	23.4505	24.2155	24.5281	22.0763
HEMH	26.4233	26.7394	26.9083	27.0402	27.2936	26.6098	25.898	26.6158	26.9415	26.2195	26.421	24.5983	27.1377	24.5388	25.6496	26.1235	25.7798	24.5039	25.5135	24.8274	25.0089	25.1293	25.1066	25.1132	25.372	26.2185	28.0595	27.0032	27.2872	25.7879	26.2675	27.2063	21.6007	25.0749	27.11	25.2358	25.8046	24.3793	27.5707	23.7673	27.6235	27.0039	27.584	27.0253	26.317	27.271	28.8038	28.1114	29.3043
MRC1	25.3817	20.1191	23.9849	25.7188	19.7737	21.0168	24.8987	25.4116	23.1909	25.568	24.1031	26.24	21.2395	20.703	21.5452	24.0727	25.5495	24.7218	25.5618	24.8281	26.1186	24.1904	26.6491	26.4598	23.5663	24.2201	21.7355	24.3878	20.7357	25.0249	23.0054	24.0113	21.4691	22.4333	25.2035	20.6584	24.0777	26.1335	20.31	21.0501	27.8038	27.8224	27.5047	27.9947	27.1351	25.7283	25.6305	24.9406	25.0837
TCEA1	27.9151	27.7462	28.6527	28.188	28.1584	27.5953	27.4784	28.0104	25.8002	24.1366	27.2014	27.599	27.0694	26.8928	27.5559	27.543	23.5951	23.6497	21.5667	23.5201	24.8895	20.2868	21.5736	22.0648	22.8036	26.1435	22.1337	22.4428	26.6834	24.5534	22.166	25.8765	26.3396	25.5547	25.7243	23.7555	28.0603	26.4934	26.9363	25.6383	23.9818	25.7226	27.4802	27.6424	26.3252	26.7997	27.6728	26.0413	25.5317
PGH1	28.3926	28.7335	24.0586	24.9354	27.7396	26.5294	26.772	27.0359	22.4701	21.0548	20.1925	21.8786	27.6052	25.7883	27.4972	24.3077	19.6805	21.949	23.2023	21.4123	20.2762	20.9304	21.25	22.0639	26.2626	27.1924	21.7931	21.4493	26.5407	26.9304	20.1527	21.1738	23.2052	22.8909	22.3964	21.9279	24.2648	24.3489	27.3971	27.6491	26.034	26.5176	25.8825	26.2083	24.6339	26.008	28.864	28.897	30.5112
SFPQ	27.3611	28.2355	23.4553	25.0425	24.9982	23.7508	22.9493	23.186	28.1036	26.8192	24.8716	24.9596	28.8633	28.4611	27.0167	25.9845	30.5482	28.2447	27.9783	28.8752	30.3006	29.6153	29.1309	29.4048	30.7618	29.3857	29.7441	29.3777	30.5064	29.5179	27.4541	30.113	30.369	28.0209	29.8917	27.7212	31.5692	31.0432	30.6735	30.6301	30.2931	30.2336	30.6014	30.8589	30.8421	30.6916	30.7362	30.9688	30.6007
TBG1	27.8599	27.8977	25.0613	25.8111	26.0158	26.5333	24.6754	25.8391	27.7452	28.2353	26.8971	27.1729	27.063	27.166	27.1672	27.1093	27.2614	27.016	26.0913	19.8608	22.3686	27.3933	26.6213	27.0769	27.6617	27.8951	26.0873	26.4954	27.0546	28.1617	22.5111	27.0303	27.0227	21.1871	26.4467	26.0697	27.2521	27.4075	27.1014	27.0268	27.87	27.6055	27.8668	27.6792	27.5846	27.9045	27.2206	27.4316	27.992
PPIB	33.4416	33.1309	34.4555	33.4788	33.6634	33.6805	34.5861	34.2145	33.3553	31.8467	31.9642	32.6621	32.9084	32.3719	32.1879	32.4659	32.6197	32.1943	31.4466	31.5003	32.4289	31.9138	31.8531	31.2313	32.1492	31.7366	30.9549	30.5726	33.3754	32.7695	28.9305	31.6317	31.402	30.4439	31.5764	31.548	33.2418	31.249	32.9937	32.9537	32.1756	32.0982	32.9243	32.7329	32.2246	32.4485	32.722	32.6247	32.5321
S10A1	22.8232	20.9687	24.2093	24.6308	25.7226	23.5902	22.2263	21.3193	26.3669	24.0858	25.7446	25.0237	27.1144	26.943	26.7383	23.4059	20.5216	21.1054	20.2472	20.8279	20.9233	21.4114	21.0473	21.3427	28.1718	25.9353	29.016	26.0061	25.0406	28.8924	21.9519	24.2992	25.3336	22.1774	21.6424	19.9483	28.0782	23.9002	26.07	20.8945	28.1972	27.9918	26.1421	26.4198	26.0868	26.1738	28.4211	28.1954	27.4075
MAOM	28.8468	28.9184	29.3692	27.1439	29.1233	28.5299	29.0321	28.7156	28.2791	30.461	32.731	29.0611	32.1426	31.466	32.0431	30.8193	30.1123	29.4668	26.807	28.2062	31.3439	31.3087	27.8086	27.4602	31.9226	31.0358	28.9367	28.9442	31.8395	30.5776	29.181	28.995	29.2289	28.8998	29.1653	28.207	31.2731	30.438	31.5264	30.454	29.8875	29.9041	29.5666	29.9712	30.0205	29.9088	30.5758	30.4043	31.1761
GCSP	20.2848	19.1682	21.9488	21.7006	21.8601	21.3955	20.9091	21.579	22.153	22.1378	25.9432	23.2926	23.4099	24.2248	20.5343	21.8527	26.4076	22.0983	20.7938	22.9335	21.407	21.6733	21.535	26.4405	26.9533	26.3106	24.61	22.3184	23.7569	24.8592	24.8481	24.4908	20.1446	22.94	23.9068	20.9216	26.2113	21.096	25.4155	25.9027	21.6502	21.0849	21.9259	20.5676	22.5075	20.4877	24.1241	20.9958	22.3653
SYWC	30.4693	30.439	31.6121	30.5542	32.4454	32.3674	31.1681	30.2931	29.6568	31.2003	31.9488	31.3993	32.1297	31.8576	32.7715	32.504	30.0128	30.3255	28.8156	28.1483	30.3598	29.6236	28.8637	28.5803	31.3342	32.6855	30.558	29.4808	31.1907	29.7967	29.9721	30.1263	31.0214	30.3354	30.2169	28.3829	31.8861	31.5896	31.4603	30.6508	32.7779	32.7042	32.4914	32.2941	32.1837	32.3463	31.9321	32.0652	32.8414
GCSH	25.3163	25.8792	25.1706	25.0398	25.5696	25.5767	25.7669	22.4628	25.0214	26.3266	27.3244	25.0009	19.1955	27.7759	26.8086	24.5967	22.646	25.035	24.2253	24.1028	21.6702	19.259	24.8542	24.9981	22.6316	22.5812	26.0862	25.3186	24.4982	23.6022	24.517	24.6143	27.0539	25.7127	26.3072	24.0867	27.1231	22.9716	26.6709	24.6246	26.8584	26.4771	25.7856	26.4459	26.3038	26.4275	25.2288	26.7561	26.6986
PTPRG	20.7682	23.2614	23.4936	24.0381	23.579	24.3955	23.9929	21.4064	21.6412	23.0832	23.2839	20.8984	22.8525	23.3894	22.1936	22.4769	21.7565	21.1397	20.4275	21.4791	19.2428	24.6949	19.3567	19.361	21.2279	21.8284	20.4156	24.5809	21.3749	23.5733	20.3527	20.244	21.2935	23.4863	20.6817	20.5642	21.0716	20.8031	20.7906	20.6081	21.0118	21.7525	19.4673	24.8513	21.6512	23.5865	22.1042	20.3825	24.1119
PTPRZ	22.1863	21.4379	19.4101	26.7866	21.3637	20.9732	20.6735	20.514	29.1973	29.5711	31.3178	29.1744	27.2807	28.0054	26.8449	25.9059	27.9304	28.5354	19.8703	20.5535	28.3658	28.4613	27.7904	20.6499	25.9336	25.5529	20.6022	25.5174	37.322	37.7156	25.4157	28.2236	24.8123	22.5215	27.2981	31.4619	26.4696	28.2301	29.4123	21.8191	31.8284	31.6176	26.3509	26.0598	28.8634	25.0217	29.088	27.0412	27.1711
SP100	24.648	24.0519	25.0867	25.0401	23.4713	24.1595	22.7609	25.0846	25.2889	24.9671	23.8583	22.7053	24.4205	21.773	26.0732	24.2572	21.0788	20.7066	22.9182	20.3719	20.6845	19.996	21.8029	21.3057	21.8568	22.3343	24.4289	20.5054	25.7261	25.1181	20.7221	20.7923	22.3598	23.5543	23.8006	23.6313	24.3842	25.129	23.773	24.8276	25.3503	24.8994	26.0325	26.1718	25.485	25.8958	26.0281	26.0068	24.1856
NFYA	20.6584	20.5088	19.8656	21.2338	22.3506	21.5401	21.4324	19.6433	22.8579	21.1377	22.4859	21.2861	20.786	20.3566	20.4789	22.0018	20.763	21.0271	20.773	21.47	20.4754	20.9214	20.1125	20.1077	19.1807	21.0854	19.464	22.295	20.9525	22.2371	20.9521	20.1905	22.4529	21.4683	19.4055	22.0063	19.4276	22.4682	22.3362	21.9796	23.3765	23.4428	24.8538	24.9745	23.5663	22.7245	23.4175	24.8508	21.8003
COF1	35.1111	35.5221	34.9621	34.2475	34.8752	34.2435	35.3268	35.0106	31.9873	30.4511	34.9998	33.2316	34.539	31.6686	34.9467	33.7385	31.7262	33.9431	32.8961	32.6045	34.769	34.204	32.7364	32.9555	31.5422	32.6203	33.4074	30.7177	33.4775	31.9029	32.407	33.3398	34.0817	32.4508	33.4469	31.9017	33.3832	32.0011	34.1521	31.4433	34.5072	34.0198	34.0957	34.0908	33.9934	33.615	33.7633	33.4608	34.223
F8I2	21.3427	24.6267	25.4392	25.3304	23.5352	24.281	23.734	23.7995	21.0732	23.731	25.3223	26.0974	25.9271	25.1256	25.8054	23.6886	24.6695	22.1522	24.8775	24.5497	19.9838	25.035	22.8482	24.5803	24.2107	26.3382	24.1578	21.2526	24.6648	23.8468	25.071	24.1619	24.6589	25.1872	24.1371	24.969	24.9313	22.56	24.6027	24.6891	25.8975	25.8471	25.6645	25.5791	25.6619	25.8372	24.4411	25.5643	25.9038
AT2B4	29.6668	29.2325	32.3366	31.0117	30.6963	30.0995	31.7772	31.3751	28.8477	28.1378	31.2331	30.6319	30.287	29.4123	31.4311	29.4358	31.4896	30.9908	31.3663	31.2811	28.8762	30.2008	31.6543	31.5944	30.625	30.8193	31.2844	31.1285	29.978	29.2227	30.2978	31.1755	30.9429	29.4264	30.7079	29.8752	30.184	29.4234	30.2938	28.3037	33.0267	32.9251	32.4974	32.4179	32.5811	32.622	32.2147	31.9004	33.0455
DGKA	27.3691	26.8508	27.5785	26.5862	27.1263	26.5763	27.0611	26.906	25.759	26.464	24.7768	26.0194	25.2076	25.3112	26.1173	26.857	25.5108	25.733	20.4011	20.282	24.9542	23.657	25.7247	24.8067	24.7353	26.3036	23.4851	22.9196	24.4775	24.7516	24.7351	26.0992	25.4504	21.9804	25.8016	24.9445	25.4846	25.2895	23.7733	25.2587	24.9382	25.3136	26.3837	26.0749	24.9408	25.2663	27.0538	26.8757	26.2662
VAMP1	21.5702	24.0905	22.0459	21.7475	21.5496	22.8746	19.1278	20.5805	21.6523	20.7051	20.3528	20.6059	21.216	23.8372	25.4039	20.9835	22.7668	20.8956	24.4566	23.761	20.9143	21.5907	21.3245	22.6662	21.8074	21.011	25.4488	23.4962	22.1475	20.2469	25.1352	24.6862	24.7199	25.9936	23.486	20.6407	24.4403	23.214	20.753	20.3784	25.951	25.737	23.933	23.9211	24.7169	24.5954	25.2041	24.9469	25.4745
CPT2	28.0116	28.1898	28.6442	28.4799	27.5706	27.4655	27.4528	26.8901	29.1014	29.4583	29.2218	28.9728	28.3328	27.9434	28.6926	28.444	25.895	25.2061	22.9792	22.8465	24.1147	24.5759	25.1981	25.0154	27.9215	29.1249	27.0376	26.6447	25.9021	27.5982	28.5708	27.1231	28.5152	26.9516	27.1569	26.9972	28.5666	26.6757	27.8251	26.3124	28.8588	28.5757	28.5306	28.4686	28.2591	28.1675	29.3561	29.2963	29.9585
RIR1	29.7834	29.3481	25.3198	24.7876	26.7358	23.4007	24.9533	24.6274	24.6222	25.6793	23.4464	26.7115	26.1764	24.6595	25.7814	26.3639	26.4476	26.032	22.1743	21.8641	23.9924	26.6158	26.1781	22.2269	25.5851	22.2561	21.7659	22.5221	25.8849	24.5521	25.5719	20.4533	21.7205	21.42	23.4584	21.9257	24.8747	23.6647	22.7463	24.607	26.3582	26.6162	24.2352	24.1948	23.9127	21.9336	22.3638	22.3008	25.0547
EF1B	31.1968	30.6878	31.007	30.8487	31.141	30.8976	30.7166	30.6492	27.8703	30.2048	30.1299	30.0589	29.8016	28.3053	30.1998	29.7597	30.602	29.0238	27.5212	28.2038	26.7062	27.8291	26.4861	27.7858	27.2656	27.7007	28.9751	29.9292	29.8651	29.9818	28.9736	29.6951	27.9439	26.3772	28.2395	26.8584	30.3507	29.0443	30.628	29.722	29.8053	29.8747	29.8503	29.5452	28.9286	30.4794	30.1432	30.3199	30.7118
AT5F1	30.2985	30.2434	30.555	30.4445	30.6102	29.1696	30.0569	29.7471	30.2092	29.1253	30.8186	30.5468	31.0714	30.4458	30.5195	30.2109	20.0422	27.4908	25.9454	21.3057	23.557	22.5624	20.6256	28.4894	30.5065	26.5045	31.4345	27.7902	30.113	27.7377	30.8062	30.8151	30.3446	29.8627	30.2316	29.9935	30.2086	30.8553	30.5216	27.8349	30.1431	29.8102	29.8468	29.6994	30.1237	30.2838	30.3033	30.1269	30.2744
THAS	21.1949	21.1517	18.6925	21.7999	21.9943	19.8987	20.0109	18.9768	17.7501	19.2566	21.6882	21.8646	21.2577	20.0074	18.4254	22.3719	23.8313	24.0703	20.4159	21.567	23.5789	23.5973	23.589	22.9951	20.0115	20.4079	21.4031	23.4013	22.1363	21.1945	22.4999	18.6236	21.823	22.5191	20.5684	21.5937	17.967	20.2627	18.0392	18.9887	26.228	26.2889	26.0731	26.245	27.0588	27.364	28.5023	27.1121	25.6677
PPAC	29.2346	29.4092	29.0033	27.9589	29.5468	28.4966	29.7333	28.6923	25.2378	28.2194	29.9116	29.2303	29.5529	29.2729	28.9562	29.1262	26.4878	27.3396	24.492	25.2471	19.571	26.24	26.164	19.4215	27.6086	26.8585	27.9434	25.2015	28.3495	28.3785	27.4246	26.054	28.094	27.3983	26.932	27.5503	26.9597	25.5121	28.7063	28.642	28.0729	28.5882	29.0234	28.5574	28.1804	28.1962	28.1883	27.8844	28.3009
MYL9	32.8412	32.4159	33.0958	32.5748	32.9875	32.193	32.629	31.3694	28.3696	31.4522	31.296	30.7968	31.2985	30.6532	30.7489	30.0152	28.1849	28.1806	29.1151	28.8501	28.9995	29.1468	28.6068	28.2139	29.0282	28.7143	30.1377	31.0595	29.889	28.03	28.4757	30.2709	30.4905	29.2923	29.6114	28.7463	30.9067	27.8818	29.5558	29.4966	30.2653	30.4829	31.8922	32.1601	30.8055	31.0133	30.9005	30.7183	30.4979
RPB1	22.64	21.9608	24.3248	22.8921	21.401	24.8899	22.8788	20.4493	20.8542	22.6333	23.3254	25.309	20.0447	19.5433	22.0982	22.5878	26.1645	26.7626	21.7414	21.9796	19.9187	26.057	20.5378	20.2498	26.3238	25.0619	21.7089	27.2892	24.2921	24.3296	27.8542	22.7414	24.0379	25.2166	24.025	25.1053	23.5409	25.9506	24.4427	24.8807	24.7915	24.5617	25.9815	24.9856	26.3777	26.6137	26.1767	26.9496	24.8863
PAR1	22.0752	21.185	27.6248	27.6103	28.3295	27.3611	25.9832	26.6598	20.7736	22.7942	20.6567	25.0909	22.9582	21.1886	19.4174	25.3978	27.7808	26.8362	25.2007	20.523	21.7627	26.5104	25.3661	26.9408	22.0216	24.898	20.983	24.5223	20.7108	21.3279	20.3793	21.7417	23.1565	20.7728	19.8713	20.9558	21.2941	24.011	21.1543	20.8979	27.7009	27.0639	27.0768	26.7503	24.7478	25.7687	27.0087	24.9739	28.7187
MYP0	29.7197	29.7454	22.1024	22.0729	18.8058	22.7534	22.858	22.4805	23.8633	26.4343	32.925	27.014	32.1456	26.7275	29.7823	25.4461	39.9534	39.8773	39.1984	39.4979	38.6679	38.4998	39.163	39.6221	39.2099	37.0593	38.5479	34.4367	38.611	34.2503	38.4004	39.2549	39.3359	34.2842	39.2972	32.7809	38.0113	32.9364	38.7828	32.6241	31.9438	31.71	32.0761	32.0742	32.998	32.8659	31.9955	31.8613	32.2406
LAMA1	20.361	19.3654	22.8119	21.2096	20.0086	20.5025	23.991	20.8794	20.2582	20.3441	23.4987	23.5097	28.3804	26.2483	26.1117	21.7047	20.3073	21.9549	20.9059	19.7459	19.9471	19.2091	20.4521	21.4189	20.8932	21.2308	22.1341	22.8011	20.8586	18.893	21.5721	18.0272	21.966	22.6824	19.3839	19.7627	21.963	22.6861	22.741	20.8009	25.0171	25.5991	20.5205	21.2942	25.7223	24.2615	19.8962	20.9655	18.8784
DNJB1	25.5632	27.2247	25.2841	22.2157	26.5195	24.4162	25.1603	26.0995	26.6698	26.7035	26.9126	26.1619	26.7897	27.1864	26.7218	22.4609	26.5465	22.1841	23.492	26.1456	23.5851	25.769	19.671	22.8665	26.1385	22.7612	22.2375	26.6436	26.2198	23.2216	27.0271	26.6551	27.3357	25.469	26.5406	22.0718	28.1007	24.5475	27.371	25.5062	27.488	28.0798	27.7406	27.481	27.1387	27.8234	27.7279	27.7075	27.4352
CATS	25.9539	26.4988	22.6593	20.2013	23.0909	23.7019	19.7098	20.9844	20.7051	26.6359	24.1332	22.3096	25.0732	22.0636	23.9651	25.0173	21.0843	20.4075	23.7587	20.621	21.3392	22.0154	21.0555	21.1766	24.6643	26.2844	21.1217	21.0559	20.362	25.7084	21.2098	22.347	19.6103	21.7053	20.9369	21.5931	21.1443	22.5356	22.0914	22.798	25.7186	25.7439	26.1802	26.2562	24.3517	25.8273	26.2143	26.1008	20.9781
PSA1	29.5251	29.6576	30.6157	30.2172	30.2605	30.0795	28.8737	29.5969	30.0918	29.1949	30.3077	29.004	30.5478	30.6191	30.2875	29.1207	28.5637	28.5728	27.4578	28.06	28.7127	29.2315	21.1215	28.3979	30.6025	30.6721	28.899	28.0297	29.9361	29.4745	28.7789	29.3226	29.3754	28.869	28.8466	28.1666	30.3085	29.3748	29.8849	28.776	29.668	29.6858	29.9921	29.8985	29.5194	29.6799	29.8165	29.7759	29.7904
PSA3	29.644	29.3496	28.8097	29.9731	30.4677	29.4417	29.5888	29.472	29.3479	26.8429	29.8668	29.6237	30.1532	27.8809	29.1346	28.6419	25.5587	25.4493	24.9502	26.0969	25.939	26.9216	21.1863	27.4176	28.734	27.125	29.2483	27.5546	29.9323	28.2419	26.5324	28.8385	29.2371	25.1464	29.0033	28.2716	29.4877	28.1312	29.3197	29.3183	28.8917	29.3255	29.2243	29.4942	28.7352	29.3891	29.4937	29.0703	29.2457
PSA4	29.7082	29.8531	29.702	29.4155	29.3267	29.4612	30.426	29.902	30.111	29.5079	29.7716	30.1151	29.7435	30.0185	30.0813	28.6085	21.5232	25.7249	24.5301	25.053	25.4721	25.6704	25.8031	25.6362	29.2521	28.1174	29.1745	28.6598	30.3039	30.2656	28.7429	28.6158	28.1215	25.304	28.495	28.3188	27.8884	28.8266	29.5611	29.395	29.0752	29.7481	30.0254	29.3585	29.632	29.7606	29.9005	29.9017	29.0295
CO5A3	21.3052	19.5184	21.1117	19.5126	21.6737	21.204	22.2436	20.9914	20.8436	21.3949	20.2184	22.6432	18.8729	21.5288	22.5756	21.0146	21.0416	21.4478	20.7585	19.0314	19.7737	20.5114	20.4621	21.9351	20.8061	21.4598	21.3801	21.9756	21.5177	21.535	22.481	21.5739	19.8141	21.8134	20.9578	21.5699	19.9833	21.4247	20.7431	20.6067	26.1528	26.0404	25.8006	26.123	26.1149	25.687	26.7338	26.3567	24.9993
ITB8	21.9113	18.1074	24.7094	20.0305	25.9414	25.8275	24.8195	24.6764	28.8533	27.8499	33.4471	31.2771	32.5673	30.2769	32.1689	30.7902	30.6557	31.2941	27.0642	27.5656	30.4585	30.5221	27.6649	28.2568	31.4238	29.8305	28.3512	25.8097	31.1104	28.2868	26.9899	27.7093	27.8949	27.1178	29.0956	27.0441	31.6017	28.7324	31.7779	29.1814	29.9724	30.063	29.591	29.2873	30.6506	29.444	28.8368	27.8927	29.279
MOES	33.0256	33.3472	33.5546	32.7717	33.1248	31.5353	32.9548	32.172	32.7249	31.5081	33.2246	32.1845	32.5793	31.7511	32.2111	32.6534	31.4599	30.115	31.5184	31.2864	30.3127	31.2677	30.6435	31.5404	32.3411	30.3849	32.1999	30.4412	32.9502	29.9581	31.0857	31.8199	32.6055	30.6512	31.7118	29.8266	32.1414	31.6638	32.5187	31.5762	32.8955	32.7061	33.1764	33.1597	32.7898	32.8669	32.7944	32.8717	32.5552
DDX6	29.5954	29.4698	29.424	29.1237	29.6475	29.2976	28.5033	27.7366	29.4097	28.9406	29.0344	29.2883	29.0945	28.7014	29.2417	29.0592	27.4872	26.955	26.0388	25.7427	25.9929	25.5544	25.4697	25.7674	29.6793	29.5697	28.5753	27.545	28.9391	29.4741	28.6477	29.2489	28.6019	28.1443	27.9015	27.827	29.3745	28.7875	29.0689	28.3082	29.1191	29.3155	29.3946	29.3109	29.0708	29.4755	29.4013	29.0648	29.7001
CTNA2	24.749	23.8536	25.2839	23.5493	23.8836	22.7704	23.6802	22.996	22.9231	22.7872	22.88	23.125	24.1295	24.5982	24.9423	24.9739	21.1183	20.8231	24.1037	24.7635	26.2559	18.9938	22.4423	19.3186	25.7684	22.1186	21.6597	21.6547	22.5082	24.5275	21.283	22.4709	23.7882	23.8067	25.9242	27.4321	21.1276	20.9427	26.0875	23.5237	28.7234	28.8511	26.7681	27.2487	28.1045	27.9166	26.8513	27.7158	27.4319
U2AF2	27.8921	28.702	27.5135	27.3394	26.6771	26.5327	26.7593	25.8758	27.1941	28.5043	27.3372	27.8488	27.8595	27.521	28.1262	28.6353	27.1423	26.5734	26.0589	26.5299	26.9243	26.6513	26.5797	26.6717	27.1832	28.2179	27.5625	27.3689	28.0849	28.8565	26.7397	27.2712	27.1507	27.4347	26.693	26.3932	28.2361	28.0291	27.9045	28.2378	27.607	27.5455	28.2703	28.4363	27.77	27.9915	28.3797	28.3703	28.4636
RL13	30.0349	30.1903	31.0662	30.1945	30.331	30.3056	29.4137	28.3015	28.2768	28.4616	29.169	27.7493	29.2408	28.7797	28.8745	29.848	30.2055	29.9751	28.9649	29.0788	30.5144	30.172	29.7967	29.4854	30.6154	30.7193	29.4807	24.7302	31.2243	29.4789	24.8635	29.3376	29.1019	28.6597	28.6393	27.3714	29.7686	27.965	29.2897	29.8158	29.684	28.2217	30.1653	29.9591	30.171	30.1849	30.192	30.3155	30.7027
ELAV4	20.5945	20.5233	18.8543	19.9936	18.6027	18.5997	20.9136	21.3214	21.7636	20.9701	19.0247	24.6394	18.7106	18.979	18.1891	22.8361	21.4767	22.6899	21.6376	22.6222	21.2052	20.8382	21.5299	21.257	20.227	22.3912	19.1122	24.6532	18.1938	23.5478	23.2006	20.2	22.8121	23.5982	22.4135	20.803	20.9479	21.4414	21.7998	22.7138	23.4439	24.989	21.9964	22.5875	27.9565	27.3944	28.16	27.9529	28.0584
IVD	27.3797	26.9826	27.864	27.9142	27.8105	27.1945	28.2581	27.8146	27.1621	27.8513	28.0572	28.6434	28.6235	28.2551	28.9845	28.3696	27.1398	27.3535	23.0979	26.1287	26.8662	26.029	26.6258	26.237	27.8376	26.0929	27.1094	26.7013	26.9214	26.4822	27.4557	26.9722	27.2546	27.4071	25.9883	26.4186	28.0254	27.1447	26.4652	27.3476	27.7262	28.4595	26.7923	27.991	28.2195	28.1923	28.2491	28.2069	29.3817
CNTF	22.3564	20.5028	20.3175	20.0822	20.6638	20.3374	20.839	23.7352	20.9333	20.787	23.6343	24.6104	23.4099	23.7182	23.5736	24.1409	20.8757	21.0871	25.0172	24.9268	21.7848	20.705	25.0119	24.875	19.7192	21.7554	27.4583	25.9569	21.3814	20.0759	20.742	26.2011	25.7468	23.4628	20.2319	22.3779	20.2222	22.6931	23.066	22.104	20.1736	21.8592	21.2252	21.0113	24.0692	22.3234	21.5832	21.6811	23.5165
SYTC	30.348	30.367	31.5839	30.0598	31.4983	30.4856	30.6725	29.9296	27.781	28.4531	30.2652	28.8834	30.4032	29.9746	30.3128	28.1111	27.0272	27.0881	23.215	25.5619	25.4107	25.6924	24.6285	23.7928	30.3837	29.2782	27.6746	25.9621	30.4998	29.9688	25.8456	26.8611	27.3379	25.5278	25.521	26.3343	29.6416	28.7177	29.8617	27.9273	29.3782	29.7098	29.1731	29.5701	29.5237	29.402	29.5466	29.4182	29.2543
SYVC	30.2506	30.2624	30.3265	29.9858	30.2626	29.5785	29.9973	29.7437	30.7882	30.5171	29.8802	29.6789	30.1304	30.1107	30.2903	30.272	25.3859	27.2931	21.5161	24.7594	25.1325	23.6227	25.0387	24.5339	30.7878	30.0283	28.2263	28.0432	29.0852	29.2642	26.5038	28.6801	29.4358	29.0727	27.7752	24.1242	30.2002	29.6178	29.7975	29.1564	30.0875	30.0379	30.03	29.9241	30.224	30.1826	30.5147	30.5048	31.2792
EF1G	31.7473	31.82	32.171	31.0702	31.5056	31.4497	31.6566	30.7782	29.679	29.8837	30.4574	29.7775	30.7189	29.9766	30.621	30.1044	29.7217	29.3546	28.654	24.9524	26.2371	25.3799	22.9214	27.7396	30.873	31.1579	28.3349	27.7603	30.4654	30.0396	27.4265	28.1438	28.6258	25.7918	25.9627	24.2576	30.7141	29.9813	30.34	28.9972	30.798	30.8765	30.4923	30.5909	30.8852	30.8104	31.2489	31.0426	32.3482
FKBP2	27.193	27.6849	29.3764	29.0149	29.4064	28.4524	27.04	28.0684	29.0028	29.2793	28.7908	27.9612	29.6076	29.1428	28.6637	28.3704	25.2663	21.171	26.2472	25.9609	22.81	22.9869	27.5675	27.4587	25.4467	27.3632	28.5575	28.4396	29.0389	28.9359	27.8882	28.6741	28.1264	25.9212	28.2242	28.1341	29.141	27.1247	29.0135	28.7476	28.9442	27.8734	28.7743	28.1867	29.0588	29.3873	30.0097	30.083	30.3834
STOM	28.6813	28.4852	29.4658	28.253	28.7569	28.521	29.3081	29.3981	28.0177	27.4494	27.7804	28.3385	28.4755	28.7941	29.7932	29.2798	27.9649	28.4935	26.4825	27.8644	26.0763	25.5346	27.975	28.6042	29.5873	29.7368	30.028	29.8177	29.3832	27.2972	28.2452	27.922	28.8847	29.0092	27.7951	28.4604	29.2538	29.306	29.7704	27.5326	28.9964	28.7546	30.0602	29.7853	29.3637	29.2103	29.7652	29.6668	29.1854
KAD4	28.4412	28.3921	29.2161	27.8397	28.8826	27.8458	28.5046	28.0845	24.9923	23.7014	24.0527	23.4052	24.9614	24.5121	24.8332	25.4347	25.2638	20.2202	25.6142	22.2477	24.9202	23.345	24.2748	26.7869	27.7224	27.0914	27.2425	26.4128	27.3114	27.4838	27.9032	28.3005	28.2974	25.8327	27.543	27.4075	24.6378	25.6754	24.8837	25.7701	29.2651	28.8625	27.6164	26.8059	28.6983	29.0686	29.0541	29.2498	29.5356
PON1	20.908	20.5764	19.1516	21.378	20.1228	21.3526	16.8897	21.3615	21.8886	21.5978	20.0783	21.4017	21.5943	21.1364	21.7558	20.5387	21.3033	20.0849	23.3116	20.3461	21.4252	21.2107	24.109	21.3793	19.6457	21.6613	25.7539	26.359	19.7895	20.4226	22.3058	25.7538	27.3117	26.1279	25.136	25.8533	21.2254	21.0789	22.8216	21.4442	28.8302	28.6998	23.0023	22.7282	27.8127	27.275	28.138	27.3981	26.1477
1433T	32.0314	32.2204	31.6772	31.8497	31.4603	31.1043	32.6272	32.2004	30.8043	29.902	33.1248	33.598	32.261	32.9464	32.5624	31.7707	31.7057	31.3314	30.8016	30.7058	30.6586	31.1986	29.9593	30.0119	31.3932	32.1294	31.4177	31.1434	31.7747	30.3526	30.3757	31.2565	32.1767	30.9107	30.8576	30.8473	31.6364	31.1624	31.7944	30.4596	32.6231	32.9423	32.4097	32.353	32.4704	32.3404	32.1665	32.5635	32.5607
MARK3	26.1297	21.3482	24.3953	25.3986	24.6709	25.5656	24.7734	26.3558	26.7331	25.8714	25.9792	25.6483	25.3793	26.0806	25.1599	25.8803	20.2881	26.3287	26.8986	26.6717	21.6169	26.5077	27.1144	20.5048	26.1989	26.4157	26.1041	26.3966	25.5513	25.547	26.5891	25.3815	25.7212	26.7477	25.7987	26.1124	25.7967	26.5505	26.0709	24.4015	24.5691	25.405	20.8186	24.7876	21.6836	25.4863	25.0384	21.9048	22.4052
RL10	28.1011	28.0224	28.5345	28.9054	29.0063	29.0165	29.3295	28.2007	28.8735	28.2841	27.4276	28.4695	28.9611	26.7056	28.3036	28.5769	26.2414	26.2426	26.3209	26.0524	26.9669	26.8463	26.3369	26.3636	29.9754	28.7687	27.8405	28.2097	29.6015	29.5117	27.1797	27.6196	27.7994	27.8249	26.9172	27.4796	29.3768	29.2651	28.7984	28.9339	27.8994	28.1081	28.4787	28.6126	28.2359	28.6788	29.2068	29.0974	29.3968
RFA1	27.8954	27.7068	27.3229	26.7782	27.3354	26.9133	27.3815	26.9713	27.8595	27.283	28.1213	27.6255	27.672	26.1059	28.2413	27.448	24.9579	25.0868	24.7193	22.0558	25.3832	20.9407	20.7244	21.4447	27.3795	26.8485	27.5447	26.0191	26.8439	27.1333	24.996	26.8879	27.9127	26.1621	25.9279	26.5605	27.1991	27.5285	26.8687	26.2289	27.8003	27.9975	27.8492	28.483	28.0396	28.3933	28.9688	28.7459	28.4755
DCK	27.3375	27.0766	25.3435	24.9513	25.9578	25.9884	26.2668	26.2918	24.322	25.873	25.3056	25.8264	25.4595	25.7402	24.0483	25.7484	23.3809	25.8043	22.1479	25.7155	23.8347	24.8293	25.8705	26.1824	24.8541	26.1897	22.2689	21.9179	24.7729	25.9351	21.2173	21.1739	23.3961	23.7239	18.9842	21.6597	24.4216	23.4453	23.9658	20.7641	25.9184	25.7651	25.6253	25.0283	25.9455	25.7183	26.5542	26.642	25.7602
PYR1	30.0771	30.2334	29.8194	28.9964	29.7402	27.7111	30.0525	28.2945	25.8714	28.8747	28.8076	27.4748	29.7614	26.7923	30.227	27.1166	27.916	27.7941	25.7638	25.3682	26.5855	24.7985	27.1264	25.5457	27.5407	26.2047	24.6439	22.2088	27.4775	26.1508	22.6229	27.2321	26.6499	27.3546	25.6921	25.5908	28.7696	27.9995	28.4835	26.4448	28.166	28.1575	28.8751	28.9736	28.5223	28.6452	28.672	28.4592	27.4067
CALR	33.4382	33.255	32.7601	32.8071	32.6295	32.3676	33.351	33.6657	33.6955	29.0163	33.4366	33.2637	33.7445	33.5475	33.2085	31.5624	32.7209	32.8344	30.8976	31.3176	32.7767	32.8081	30.7696	31.2133	32.2162	31.5766	30.6132	30.7806	31.2737	30.7162	31.0758	30.5109	31.3967	31.0227	30.1864	28.9916	32.0098	30.5195	31.8589	31.4159	32.5426	32.4283	32.7957	32.6227	31.8229	31.8185	31.979	31.9975	32.9843
CALX	31.518	31.8796	32.9336	32.9261	31.7506	32.3782	31.5496	30.8761	30.8879	30.3284	32.0413	30.5618	31.949	32.0035	32.0447	31.1807	30.0947	30.8433	28.4298	28.2499	30.957	26.3566	30.6517	29.5463	31.6758	31.5602	30.9591	30.0089	31.3557	31.4461	29.0158	31.2434	31.036	29.9898	30.6927	29.2585	31.8062	30.5249	31.3353	30.2844	31.4787	31.3531	31.3609	31.2492	32.0634	32.0298	32.2009	32.1623	32.2829
P85A	19.9062	25.0941	25.2554	20.0826	19.3323	20.9575	25.5427	21.0653	26.0246	24.7695	26.3465	27.0156	26.1567	26.0042	25.6589	26.2379	20.8736	18.0065	19.2189	21.2733	20.5408	21.6202	26.1556	19.9101	24.542	20.5789	24.8525	25.9657	25.8198	22.8858	26.3051	25.7369	24.8261	21.0401	24.5722	21.3124	24.7057	26.6237	20.0893	24.7594	25.7438	24.888	25.4432	25.5623	25.9639	25.8393	25.6145	25.9833	26.1285
PSB8	28.6187	28.6917	28.3386	27.5407	27.7617	27.0572	25.3077	27.5866	25.7412	28.913	29.1045	28.5226	28.4731	27.7215	29.2859	29.3771	23.7867	26.6393	26.2279	19.316	26.9985	26.4297	27.3603	21.2276	28.4328	24.8143	28.2422	26.637	28.3123	24.3584	25.857	27.451	27.9409	21.3677	28.1433	27.6634	28.1173	28.0153	27.8673	28.5183	28.4045	28.2321	28.7404	28.5358	28.7919	28.5307	28.5868	28.4686	28.0755
PSB9	25.1196	27.5719	25.8676	24.6765	25.6149	25.4446	25.8558	25.5588	27.8015	24.6371	26.9765	24.7181	20.9202	24.5493	24.4858	23.0358	24.4299	25.4723	21.0716	26.4427	25.6658	25.5051	22.4811	24.8734	26.7879	22.6784	25.5632	27.0128	23.1811	24.9816	25.4659	26.8102	26.8094	23.3516	23.6512	23.8288	25.0136	22.5227	25.437	27.2433	27.727	28.1117	28.9382	28.5973	28.0797	28.6223	28.9387	28.9453	27.7825
PSA5	30.4069	30.4176	30.5758	30.6395	30.3751	29.0002	30.3267	29.1058	30.986	28.6333	30.9014	31.0933	30.1603	30.9081	30.3937	28.7888	30.1316	30.2233	29.0617	29.0246	30.6567	30.0209	29.2336	28.06	29.9879	29.671	30.0136	27.863	30.1172	31.2427	26.756	28.8742	29.6775	27.3048	29.7409	29.3295	29.4948	28.5911	30.3224	29.6059	30.1288	30.4344	30.2193	30.4112	29.7552	29.9969	30.5122	30.0999	30.4899
DMB	21.0887	19.0442	19.5619	20.3247	20.5612	20.6213	21.0844	19.8714	24.9175	26.0893	20.4531	20.2572	26.8339	26.2559	21.8586	22.5837	23.9292	22.1282	24.3793	22.665	21.9877	21.5949	24.2697	21.0306	20.2313	21.5376	20.4514	21.8818	20.3487	20.7286	24.6919	20.2192	20.4741	21.0875	20.5644	20.982	23.5495	24.2786	21.3211	24.3466	24.8381	24.6847	24.2268	24.0634	25.1275	25.1972	25.3484	25.5849	23.9999
TMOD1	21.3436	23.1409	20.7889	20.8631	19.9429	21.5659	19.2833	22.1527	22.6915	22.0685	22.9986	22.5382	17.2943	22.8566	20.7004	21.7133	21.5566	20.8332	23.4299	20.4167	22.265	20.6223	20.0146	23.1893	21.3987	17.6168	28.8512	26.2432	24.0454	22.263	25.3943	27.623	26.4219	26.033	25.5355	24.312	24.8641	24.8367	24.0406	24.6723	29.2858	29.4672	28.5132	29.0041	29.305	29.5689	26.9376	27.7891	26.824
LYOX	24.7506	25.1893	28.8481	27.6296	27.816	27.871	27.537	28.5	20.6488	24.053	23.0547	23.0182	22.4603	22.1135	24.1573	23.7318	21.9288	21.165	20.7359	20.8283	20.6159	22.6942	19.949	20.6228	21.6232	20.7403	24.1926	24.5664	22.8203	19.9259	21.1357	23.6966	24.1273	23.1993	24.3309	24.8673	23.4357	22.3806	23.4804	23.9423	21.331	21.9489	21.0165	20.802	21.3612	22.421	20.9921	21.3537	21.2554
NDUS1	28.4378	28.6455	29.7166	29.0475	29.114	28.9123	28.6324	28.2776	30.0223	28.2281	30.0813	30.0629	29.6324	29.512	29.2881	28.5407	28.1636	28.6942	26.4602	28.2874	28.5545	28.2361	23.957	27.7288	29.5877	30.1829	29.8107	30.0385	29.2852	29.1537	29.3996	30.3712	29.8733	30.0354	29.7222	28.839	29.6862	29.6296	29.5351	29.8187	30.1477	30.1218	29.8954	30.0033	30.0456	30.0612	30.482	30.6225	30.7096
GRAN	23.4514	24.6016	22.9049	22.6435	21.6114	22.4867	22.9744	20.6868	21.0311	24.603	23.6839	23.8403	25.3265	24.5443	24.1078	22.735	22.0417	21.3324	22.2614	21.4465	21.2438	20.9506	23.4561	20.9052	22.653	21.498	25.4572	20.6639	24.2676	21.051	24.2207	25.1846	25.9925	21.6311	23.575	21.543	20.2605	22.2828	24.6644	21.646	25.8412	26.1199	26.5713	26.3399	26.2599	26.6659	26.4799	26.6299	26.151
AMPL	30.7575	30.5306	30.6005	29.0914	30.6062	30.0695	30.4376	29.5532	28.3896	26.1881	30.732	29.6921	30.6549	30.5011	30.7024	30.0842	29.1092	29.0384	28.5316	28.7544	27.5838	28.5026	28.335	28.8413	29.702	29.164	29.6004	29.0751	29.9905	27.9148	28.6852	29.8806	29.6141	28.3368	28.7832	28.6491	29.541	29.1728	29.631	29.1808	31.4695	31.6957	32.3511	32.5728	31.3428	31.3671	31.8809	31.5329	31.4073
CD38	19.1426	20.7479	22.4092	21.9504	20.8905	22.8991	18.6496	21.1708	20.6202	27.5995	20.3025	21.6564	18.9928	19.1845	21.0273	22.03	22.7828	20.5581	22.4078	21.0401	20.1403	28.8952	20.1127	20.5175	27.7915	20.4751	27.7984	28.6863	21.6198	21.3606	28.9518	27.5447	28.3831	27.7794	27.2907	20.5601	27.8096	20.9173	21.5697	19.9721	28.5918	28.6893	28.4242	30.1995	29.554	20.9136	28.658	28.2633	27.9791
T2EA	25.1209	24.0855	22.7583	21.6207	21.5827	21.8539	19.9804	22.0404	24.8085	23.9439	22.5485	21.3045	23.1238	21.8053	24.1634	22.9907	21.0661	22.011	19.9837	20.6034	21.4406	20.5842	22.4565	19.5565	20.9645	23.5164	20.8098	21.921	22.3009	23.2651	20.8154	21.1183	20.1527	21.2149	20.1627	21.7724	23.5694	22.6679	22.7724	21.7864	23.6957	24.2859	24.5037	24.2144	23.1958	22.9158	23.9593	23.8624	24.0425
NEC1	23.4035	20.3809	21.3831	20.4313	21.2429	21.7117	20.9489	21.4493	22.278	21.5359	19.8114	20.8489	19.9669	23.4677	20.1213	26.3468	21.1495	21.2657	20.6674	19.3757	21.0357	19.5651	21.6997	21.0469	20.4758	20.5047	19.8421	22.1934	20.0514	21.1962	24.0493	19.4756	20.1231	20.6811	20.3864	20.6112	20.3831	20.1385	19.7505	21.9467	25.6886	26.4791	23.3286	25.6403	21.4673	22.1814	28.6536	29.7221	26.2237
TPP2	29.4642	29.655	29.7115	29.5543	29.3657	29.065	29.5924	29.1047	29.66	28.0538	29.9454	29.0802	29.2385	29.1204	29.4121	29.4023	26.3593	27.651	27.18	26.1024	26.9914	25.991	24.8695	26.5341	29.224	28.7962	25.9567	27.1419	29.391	29.4271	26.4349	26.2096	26.2584	27.3915	27.4686	27.4333	29.5276	29.2743	29.1779	28.7268	27.67	28.3153	28.6958	28.9756	28.8602	28.6117	28.7533	28.7382	29.2302
EPHB2	24.4116	25.0532	23.2737	23.4298	24.9069	24.9461	23.4735	23.9727	24.423	24.3499	22.3655	24.7494	21.6245	20.3991	20.0167	25.3354	20.2043	23.8648	20.9351	19.8593	20.2973	20.7598	22.2007	19.8663	24.3331	22.7241	24.1474	24.2587	23.334	20.3464	23.3244	23.938	21.9967	21.5112	19.7645	23.1482	21.9714	25.9949	23.4202	22.369	23.4614	24.153	25.2964	25.4345	25.3983	25.2257	22.6225	24.4466	23.7813
PTN6	24.7101	20.6891	20.3815	21.5739	21.3264	21.5979	21.5701	22.3244	24.3268	27.0625	21.7927	22.3228	22.5756	21.2084	22.4511	21.7304	20.0699	19.1304	20.8232	21.7	21.1325	20.1516	21.5054	21.6182	21.56	19.778	20.5961	20.7642	22.5079	22.483	22.4142	20.778	19.7071	21.8308	20.9673	22.64	22.3995	21.4208	20.6953	20.4063	26.5308	25.6833	27.358	27.1363	25.7596	26.5764	29.5399	30.0176	25.3063
SHC1	25.8524	25.1758	27.6204	25.6701	27.6771	25.474	26.1751	26.4196	21.4754	25.0088	25.7927	26.2445	25.9315	26.238	25.6419	26.1485	24.5124	21.3667	19.2982	21.3486	20.4413	20.7783	24.709	23.1429	23.0317	23.4955	25.3512	23.7325	25.4553	25.6698	22.1201	22.3535	23.9957	24.0428	20.7316	20.1943	25.1256	23.9747	25.0346	19.2744	25.1667	25.736	26.2504	25.7122	25.4726	24.0578	25.4994	25.5718	25.575
ARI4A	21.5444	20.1398	28.3193	26.9002	20.9659	27.6938	27.5316	27.9729	20.8758	21.5591	28.0691	26.5975	20.0718	27.938	20.7862	26.322	27.8633	20.8997	20.1217	28.9403	20.5208	19.7593	27.7897	20.7642	27.4927	28.1039	20.9734	19.555	27.446	19.5997	21.8924	20.5159	27.472	21.9503	21.2432	28.1886	27.8924	27.9525	28.3664	28.5519	21.1703	20.7077	20.217	20.9291	21.6561	20.736	26.5558	20.8744	20.6784
TKT	32.8516	32.659	33.3151	31.9246	33.0825	32.8024	32.6201	31.9162	31.9042	31.1421	32.9882	32.657	32.9493	32.629	33.7636	31.2515	31.2881	31.9662	31.5446	31.331	29.683	29.5162	31.5464	31.2214	31.885	31.0983	32.2483	32.1021	32.6658	32.8924	31.1511	31.8506	32.1767	30.8524	31.6271	30.8371	32.5325	31.3448	32.1181	30.5602	32.6717	32.7346	32.5841	32.5266	32.8238	32.8228	33.1403	32.8702	32.324
CASP1	20.2363	25.5211	24.1124	24.4509	23.9695	24.3997	24.3095	24.2494	21.9839	20.3167	23.6096	25.4948	23.5312	24.2582	23.5941	23.6872	24.1104	20.8917	22.6361	20.371	20.7166	23.2694	25.6946	25.9811	22.0524	20.031	22.4225	20.1563	19.2698	24.5208	24.4984	19.6609	25.494	25.2149	25.127	27.1939	20.4838	23.1721	22.9747	19.8912	26.9879	27.0127	27.7169	27.2075	27.5722	27.0639	27.3122	27.0427	26.5665
NOS1	19.7167	22.7401	25.1497	24.9838	24.8163	25.4483	24.7327	24.1438	24.2674	24.5983	21.6158	24.5079	25.584	25.5979	25.8116	23.5685	22.9741	21.4057	22.5299	24.538	21.6388	22.3994	22.1771	20.2859	21.6186	22.7282	26.5158	24.4397	25.228	26.4524	25.7039	25.1525	24.3657	19.9232	26.7704	23.8274	25.4995	26.0747	24.9056	19.6345	25.5024	27.395	25.9736	26.9939	31.6073	31.2907	22.4874	22.9143	31.7421
RBMS1	26.3542	26.3807	25.9336	26.2327	25.873	26.039	25.5419	25.8581	26.9489	21.8074	26.0519	26.5365	26.4531	26.5705	26.626	25.8546	25.8308	24.1848	22.3837	24.0123	24.886	24.483	24.7153	24.4891	25.3969	25.2978	24.2709	25.0088	19.5107	24.5499	21.2268	24.4917	24.2881	21.3295	18.8813	23.6342	25.6857	26.7226	25.957	26.7742	25.5096	24.9001	26.1736	26.2775	25.4063	26.2092	25.8927	26.2353	26.1868
PML	25.8412	27.2956	27.5909	27.2591	25.2324	26.183	26.4735	26.0456	27.4697	25.4535	26.2939	26.9475	26.9897	25.755	27.9334	27.1609	28.6301	28.7505	28.3662	27.8069	29.4982	29.6725	28.3316	28.5752	28.1846	26.4141	27.8439	27.7413	28.3435	28.1173	26.345	28.4989	28.5645	27.3392	27.8908	26.9682	28.7039	27.5252	26.3938	27.1387	30.2784	30.6985	31.8565	31.1877	29.9248	29.0914	30.6849	30.86	29.9952
KAIN	22.7133	22.942	20.144	26.9969	20.9914	27.5019	25.2612	20.4375	27.0655	27.1157	23.7919	20.5686	23.0969	22.636	26.241	26.3121	20.9991	20.5347	21.5734	22.476	20.5709	20.3078	22.8295	21.4491	20.2724	22.0055	27.9574	25.559	21.5088	22.1879	25.5134	25.7155	24.5264	28.3678	26.6792	25.4729	23.4422	24.2004	22.207	22.9399	27.3353	27.4058	22.8012	22.0861	24.6039	25.4525	25.3939	26.6786	26.2412
OAS2	20.3362	19.9	20.7805	20.9763	19.5899	20.923	20.5616	22.1431	21.2928	23.0742	20.1169	21.3787	22.3898	22.6093	22.161	21.1757	21.8275	20.9374	21.6399	21.1092	21.8519	21.1384	21.0711	21.4016	20.2721	19.9928	20.3569	20.5419	21.7876	21.9073	20.1826	20.8505	22.5909	21.7788	20.5767	21.3573	22.0395	22.3691	22.074	20.7782	24.8581	24.969	27.897	28.1562	22.6209	22.3988	25.2033	24.9713	22.5917
RABP1	20.3552	21.0548	18.8898	24.3063	20.8035	22.3121	21.3812	20.6315	20.2104	19.8848	20.5938	21.7704	20.3924	20.6816	21.4038	21.2216	18.0038	19.1797	22.1332	21.8584	23.1067	22.035	20.3148	21.6171	19.7281	22.0236	19.4682	20.9406	20.5083	21.7234	22.6654	20.872	21.832	21.3731	20.145	21.1862	19.6538	21.0238	19.4409	21.7894	21.7031	19.4924	26.1621	26.2764	20.0638	22.6112	22.8131	22.0966	30.9869
MARCS	31.8052	31.7264	28.9205	29.9923	30.1821	30.5129	32.2478	32.1342	31.9687	31.716	32.3242	31.1594	32.1755	32.4686	30.7901	30.0131	32.3436	30.6824	31.6307	32.0791	32.201	31.9621	32.2196	32.1442	31.0022	31.365	30.8583	29.4311	29.2902	29.8174	31.1353	31.0842	28.9157	28.6432	30.7751	30.8341	31.1457	31.1047	30.3484	30.5114	30.1287	29.9261	29.7906	29.2858	29.9031	29.3486	27.8739	28.2003	30.0835
ERP29	30.5204	30.6431	30.7246	30.5827	30.8015	30.656	30.5012	29.8146	30.4579	30.0907	30.5387	29.7378	30.1582	28.955	29.3661	28.2248	28.5588	26.9827	27.8466	27.0689	28.4795	28.239	26.6375	27.314	25.2608	23.8763	28.9201	29.2824	29.8392	28.6127	26.9748	28.3693	28.4425	28.1094	27.6468	28.3511	29.5024	27.0186	29.7651	28.9161	30.088	30.0042	29.6505	29.5802	29.9639	30.1072	31.1399	31.1648	31.09
DOPD	27.1949	28.7424	29.005	27.4122	29.4906	28.722	27.9677	27.4878	26.8301	27.8397	27.2558	26.3487	28.331	27.2645	28.2636	25.1898	27.3392	22.0858	23.4871	26.8546	21.2814	20.5301	23.134	26.7886	26.6713	26.5183	27.7346	26.697	27.2514	28.2614	27.2023	27.7721	27.4123	27.0281	26.9675	26.9035	27.3155	28.0676	27.4489	27.3503	28.209	28.2981	28.2668	28.0509	28.4388	28.1989	28.2524	28.1786	27.3993
PRDX3	30.3886	30.3459	31.482	30.0259	30.7104	30.413	30.6413	27.3925	30.6367	30.441	31.0329	26.8567	30.9307	31.2334	30.984	28.0529	28.3776	28.639	27.5891	28.311	29.4493	28.7894	28.3369	26.7742	29.6635	28.3386	31.1059	29.605	30.0894	29.2348	29.1494	30.6013	30.6905	21.5775	30.0373	24.0604	31.5031	26.2961	30.6118	30.6584	31.1527	30.9126	30.4056	30.4382	30.7577	30.8462	31.2185	31.1979	31.5164
ATPD	29.435	28.6643	28.7694	29.6662	29.0424	28.8045	28.9656	29.577	30.7972	30.1765	30.2714	30.8614	30.0026	29.279	29.2375	27.0815	30.3388	30.2116	29.2574	29.3581	30.5113	30.1693	30.0947	29.7862	25.8308	26.7693	28.8161	29.118	28.5044	25.3331	29.6061	29.0195	27.9236	28.6051	29.1444	29.1926	28.8126	29.2932	28.6076	29.0302	29.1072	28.6566	27.9866	26.8853	25.5219	23.8415	24.7093	27.2733	29.5255
PDIA3	33.8126	33.8076	34.1154	33.5976	33.8793	33.939	33.6976	33.7011	31.9637	32.7224	33.2792	33.2271	33.1106	33.244	32.771	32.2618	32.8815	32.7088	31.9134	31.2907	32.8563	33.0375	31.7806	32.0275	31.9519	31.3634	31.8271	31.8802	32.9284	32.7838	31.7535	31.9639	32.1612	30.5681	31.7934	29.7088	32.6859	31.1832	32.8166	32.6446	32.7827	32.7193	33.0943	33.0411	32.6723	32.5708	33.0662	32.9098	33.4428
2AAA	30.6482	31.0133	31.497	31.5757	31.585	31.4027	31.3615	31.4038	30.0121	28.0671	31.4164	31.548	31.5533	31.6463	31.4468	31.2402	29.0363	29.6657	29.3288	29.0631	27.4886	28.5613	28.5586	28.5733	30.6269	30.4424	31.1247	31.0704	30.9491	30.2626	30.9919	31.3258	31.4177	30.734	30.4264	30.1304	31.0275	29.9087	31.2825	31.251	31.2456	31.6359	31.1421	31.22	31.7246	31.6828	31.7754	31.7777	31.4839
CDC27	24.9222	25.1763	23.1345	22.2466	19.4766	22.7164	22.9631	24.0415	24.1133	24.8105	22.8766	23.6504	21.2879	23.9875	20.7892	24.1219	20.5611	24.1967	20.3322	21.1886	22.3227	20.8492	19.9823	20.3552	22.653	25.6875	21.5671	20.663	21.249	23.6569	21.5638	21.909	20.8651	21.9497	21.0434	20.4179	23.5846	22.4978	19.3837	22.7059	22.086	22.8619	23.4336	22.5729	22.7613	19.968	23.8164	24.162	23.9643
PPIF	27.4418	27.2926	25.8221	25.9961	25.5828	24.7578	25.5227	26.2052	24.9224	27.9493	27.2332	25.5308	26.759	26.365	26.0092	24.2791	22.101	20.2364	19.5712	21.4594	21.5773	20.7248	20.2498	21.0587	23.8757	25.4579	24.2029	20.8751	25.9475	25.2959	22.6274	20.8031	24.4849	21.9271	20.5707	21.3484	25.248	21.4505	25.305	25.415	25.9138	26.6217	25.4274	24.051	23.627	25.4529	26.8813	26.52	26.8667
NMT1	28.0846	27.9959	28.3541	27.9191	27.7263	27.6848	27.6962	27.1476	27.3353	27.4903	27.7827	28.0233	28.1661	28.1316	28.6958	27.9078	26.9905	25.7359	25.6952	24.2904	25.9379	25.6545	22.8141	20.4334	28.9458	28.1736	26.4173	25.7359	28.9654	28.2984	26.3061	26.7252	25.9804	26.3958	21.2425	20.9769	27.9495	26.863	27.4701	27.862	28.2302	28.4751	27.6654	27.79	28.2196	28.4758	28.3866	28.618	28.7071
1B15	23.7667	24.4719	24.4532	22.7583	24.5798	23.719	20.3108	19.971	26.2573	26.9834	24.6086	24.779	25.5187	25.619	20.4096	25.5111	21.1435	23.6891	21.4139	20.2307	22.7216	21.8539	20.1435	22.9047	25.5405	24.4386	26.6007	23.8963	23.7643	24.4333	25.0296	25.321	20.8085	21.0454	21.1898	19.9727	24.2937	23.1626	22.9031	21.2263	26.564	27.2283	19.9311	20.6191	26.9312	26.9367	27.5146	27.225	27.4682
1C04	25.8147	25.4463	25.2426	20.5355	19.673	26.0445	24.0368	21.3425	20.7027	26.6232	26.9063	26.3258	20.0079	24.2461	20.8424	24.0866	24.1073	25.6168	20.2787	20.682	26.1164	19.7842	21.8755	21.5516	21.8895	25.8691	19.6936	18.947	21.2445	21.4095	22.6206	18.8484	20.0353	22.4705	20.1889	25.5337	20.3538	21.4935	20.415	21.6623	26.2804	26.2329	22.0124	25.4009	21.0573	21.7954	22.3354	22.4672	20.8997
HMOX2	26.8454	26.5594	27.8036	26.9717	27.2109	25.3716	28.0573	26.2199	27.8621	27.8168	27.3791	27.0594	27.851	25.9325	25.6659	26.565	25.7311	25.224	24.9771	23.2336	25.1185	25.2649	24.5708	20.3911	27.0689	27.6178	28.5299	26.4925	27.5079	24.5777	19.541	26.3371	27.2518	27.3193	26.8687	24.712	27.4034	27.1489	27.7161	23.9754	28.2551	28.618	28.0375	28.2345	27.9325	28.0568	28.5704	28.6503	29.3679
PURA2	28.9122	29.5192	29.238	28.2714	29.0045	28.6512	28.5596	27.6467	28.2265	28.1028	27.5993	27.0101	28.663	27.7195	28.3808	27.222	25.5348	26.0284	24.2681	22.6897	24.4086	23.764	23.2681	24.8181	27.904	26.6169	25.8481	26.7098	27.8229	26.3252	26.6048	25.8533	27.2452	26.5264	27.1286	25.8842	26.6775	26.8715	27.1804	26.879	28.7031	28.8277	28.5128	28.6723	28.0512	28.1882	28.0013	28.1954	28.2538
UFO	26.3901	26.4013	26.2139	25.8634	27.1426	26.4432	27.2091	25.8791	20.958	25.8113	24.7899	25.1467	25.4832	25.3381	22.9653	24.7405	24.2402	21.1973	19.952	20.7991	21.8769	21.2866	23.5998	23.0624	24.2496	25.5547	23.8702	22.6426	24.0413	22.9057	22.3885	20.0773	23.3724	24.3565	23.7962	24.728	22.8098	22.5686	23.7883	24.0729	24.3106	23.856	24.1084	24.4061	25.1105	25.4432	23.0716	21.4179	23.3554
PUR8	28.3759	28.4487	28.0624	26.7691	27.4747	25.4522	25.5859	27.5808	26.3235	25.5363	27.3869	27.0679	27.1623	26.8605	27.1805	25.3585	26.1121	26.7	23.6132	23.2669	21.9056	22.4259	24.3171	26.9484	26.6031	23.7447	27.0883	26.622	25.8152	25.4227	26.19	26.7078	25.5114	24.2909	25.5252	24.0961	27.3878	23.2677	25.3948	25.0316	26.877	27.2207	26.6863	27.1493	26.9762	26.4355	26.1278	26.4899	26.8037
CLIP1	30.0521	30.1481	30.1832	29.2819	29.6661	29.0717	30.0504	30.0637	28.9324	29.4298	29.604	29.465	30.1339	29.6642	29.0493	29.2048	28.4888	28.8133	28.1438	27.768	27.7113	27.8598	26.1622	27.7108	27.5186	27.3918	29.2943	26.6671	28.8616	29.1312	25.1704	27.6538	29.3168	27.3936	28.3616	26.8915	29.9956	29.4659	29.4282	29.5604	29.7229	29.7473	29.0162	29.0603	29.4091	29.4352	29.2606	28.8761	30.0422
ILEU	29.5465	29.6992	29.1696	28.337	29.2422	28.3487	28.5734	28.1839	27.8094	24.3902	29.7502	28.9617	29.6874	29.3066	29.4835	28.1992	27.9486	28.4486	27.6755	27.5585	28.0796	27.2748	27.6516	27.9792	29.0113	27.4929	29.335	28.8031	29.1596	29.3641	28.8093	29.1238	29.4052	26.2261	29.1545	29.2011	28.9495	28.7069	29.226	28.5266	29.4439	29.6508	29.5111	29.5442	29.0767	29.3079	29.9826	29.7453	29.2071
CTR1	19.8139	20.0495	26.6204	25.459	25.8673	25.0312	20.7996	20.5704	23.3665	23.2607	22.187	21.7045	19.6202	21.8181	21.5281	23.338	21.4123	20.3984	20.1104	19.8584	21.4461	21.5808	19.6532	19.9382	21.5188	21.995	19.0745	21.0121	22.2168	21.9472	22.0027	20.1338	21.8292	21.4	19.6694	21.4224	22.0317	23.5197	22.4603	21.0798	21.9707	20.8545	19.1504	22.0708	21.8428	21.7465	21.1799	22.3882	23.0601
AL1B1	28.0947	28.2828	29.6922	27.9716	29.3553	28.992	28.4453	27.7781	25.1785	25.0958	27.8404	27.4795	27.9606	27.0418	27.1882	26.6465	25.5236	22.4179	21.441	19.9106	24.1362	20.6609	24.463	21.0344	25.6935	27.5472	25.8019	24.3629	24.8169	24.6003	26.2051	27.3556	26.2365	25.0552	21.0419	24.0274	26.2293	26.0798	26.0518	26.8223	27.0471	26.4431	25.3336	24.9842	25.7633	24.6025	25.7871	27.1278	26.6594
RPB2	26.1479	24.1597	25.7439	23.5651	24.6327	25.3766	23.3275	23.9758	25.2237	25.5861	20.0599	24.8615	24.475	23.8976	21.8904	25.0892	21.2978	24.2892	24.4852	25.8588	24.7946	23.7028	25.1827	21.292	25.8239	25.5069	22.8583	20.1293	22.6891	25.1502	19.7911	23.7453	24.3716	24.8819	24.5908	24.5879	26.6787	23.4227	23.6167	25.0733	24.6987	26.5637	26.4222	26.5288	26.3536	26.2187	27.4844	27.3776	23.8356
LCN1	20.061	21.184	20.2073	20.7899	20.3119	23.3384	20.3791	19.6363	21.6602	22.8213	22.3536	23.0573	21.7693	21.2735	20.8946	20.1614	26.2664	26.3658	26.1803	25.9756	26.3558	26.1681	25.7875	26.1109	23.556	22.1071	21.8191	21.273	21.8312	24.1203	19.7733	21.5531	23.6859	24.0437	25.2729	25.5037	21.42	21.5332	22.8883	21.0463	21.0489	21.2308	22.1726	22.3073	20.8461	21.5672	21.5825	22.1499	21.4802
COR1A	26.6384	26.8943	20.8734	20.6159	20.0183	25.1844	21.3455	22.4147	23.8984	22.2411	20.754	18.0289	20.7077	22.2531	20.9276	21.3967	22.6153	24.5798	27.4596	27.2856	25.0762	22.605	27.7292	27.2232	24.6085	24.8099	24.4194	24.1928	22.5911	22.6741	25.0388	20.8354	26.4135	25.5536	22.1806	24.0838	21.4301	22.2226	22.257	23.0437	30.2881	30.1096	30.5891	30.5051	30.123	30.2468	31.3712	31.2894	29.6331
S10A7	28.3697	28.2447	25.9698	24.9066	23.7729	21.172	25.0191	24.5841	26.3693	25.9962	26.9104	26.2828	24.4646	25.2505	26.3778	25.0935	26.5608	25.9106	28.3	28.4945	25.7793	26.4383	26.1255	27.4706	22.7532	20.9699	27.6685	26.627	27.8859	27.0262	26.5914	27.8976	26.488	24.7738	28.0288	26.746	26.3547	24.8123	27.1316	25.7075	27.1553	25.8589	22.7792	25.8569	23.2165	21.5958	24.9566	24.399	25.8612
METK2	29.7955	29.8634	29.6975	29.6162	29.9575	29.3176	30.0926	29.5159	28.233	28.2462	29.3011	28.9925	29.768	29.1725	29.7155	29.215	27.0014	25.8406	24.8683	27.0122	26.6782	25.9225	26.7773	26.8567	28.6338	29.8948	29.0749	28.0653	29.461	29.435	28.6048	28.7376	29.0952	27.218	28.5954	28.1023	29.2194	28.9393	28.9955	29.159	29.5401	29.6693	29.4567	29.4227	29.5534	29.8093	29.5495	29.7947	29.2142
KAP1	22.9024	21.9021	24.3728	24.6423	19.7064	24.0097	22.472	23.7992	24.6937	21.6921	20.2151	20.8668	23.5664	22.1603	20.9082	20.4131	20.4247	20.9597	20.8063	21.8488	20.97	21.7768	20.1252	20.8704	19.7357	22.0625	19.3761	24.8834	19.4643	24.251	21.3285	23.9012	21.842	21.444	20.9243	21.8537	22.0262	22.4474	22.8686	22.4348	25.2827	25.7656	24.5701	24.578	24.6083	25.6147	24.9842	23.1225	25.7059
KAP3	22.6189	22.6672	20.6933	20.9568	20.5772	19.6503	20.7599	22.0352	23.2777	23.2505	23.5698	24.3696	25.5165	24.6829	23.8163	24.5342	20.7664	21.1005	22.4266	22.6228	20.648	20.4893	22.8132	20.2962	22.2065	20.4938	25.529	24.0996	21.6919	22.78	24.2942	23.6695	25.6099	21.9871	25.6937	23.7274	25.0737	23.0189	25.586	21.8671	27.4682	27.5266	27.6883	27.1927	27.6246	27.1634	28.2769	28.7478	27.818
RIR2	26.8911	27.1035	24.5676	19.3056	25.0616	25.4643	24.7509	24.9342	25.8681	25.0794	26.1072	26.0291	25.7288	26.2798	26.5988	26.2442	22.6505	21.5871	19.6285	27.0292	21.337	20.3827	21.5789	20.1017	26.3182	26.1791	24.6889	24.3338	25.9245	26.6885	24.4615	24.3145	26.7403	20.2711	20.5497	24.4628	25.0639	26.2481	26.1045	26.1584	21.111	22.6541	21.5626	21.2771	22.8294	20.8704	22.7261	19.8706	21.367
FMO3	21.4422	21.4126	21.1661	20.5803	20.594	19.5027	25.3314	22.9646	20.1854	18.5175	19.4746	22.0652	20.9314	21.2541	21.1688	22.7065	20.4888	25.765	20.0924	19.3007	19.73	21.5907	20.6247	19.8552	20.2714	20.4409	19.9425	26.7709	21.4528	27.2711	26.9304	21.6443	21.5802	29.3566	19.2867	20.7035	20.968	26.7886	27.2156	27.0602	29.2237	29.3714	25.2073	26.2997	25.4564	25.9525	27.5694	28.4284	21.148
DNJA1	28.9416	28.961	28.3413	25.473	28.1683	27.4789	28.0722	25.4315	29.2747	29.2802	24.2067	28.015	27.4872	26.5876	28.3948	26.7728	27.4898	27.8854	26.7424	27.1611	27.8707	26.5457	25.7002	26.6012	28.5863	29.5563	28.9942	28.6151	28.6341	28.8648	27.996	26.5106	27.7864	27.1629	27.6833	25.2008	27.3598	29.0993	28.6859	29.8175	28.8915	29.0145	28.5983	28.5975	28.9121	28.3444	28.5193	28.1663	29.0221
AKT1	26.4582	26.7934	26.7813	25.9907	27.7775	26.6544	26.9694	25.6756	25.9178	25.8858	27.1364	26.9325	28.7839	26.6278	27.0367	27.2398	23.7132	21.2104	21.8583	19.6582	28.1477	21.0431	21.2788	20.3344	26.6915	23.925	23.8271	25.4599	25.469	25.7102	20.9686	22.3642	26.5875	24.2101	23.8564	21.44	26.6885	25.1787	27.0743	26.3267	26.2748	21.3876	27.2365	26.3779	25.8395	25.7905	25.9086	24.7375	26.3901
PUR9	30.8296	30.5984	31.3173	30.7767	31.0767	31.1033	31.2445	30.369	29.7225	30.2013	30.2387	29.766	30.8086	29.5627	30.8411	30.3368	28.2128	28.3485	27.3848	26.8474	27.4987	28.6223	27.4842	26.2264	30.4252	28.7342	30.2865	29.1557	29.8436	28.7602	28.212	30.0325	30.4097	30.2136	29.6986	28.499	30.2996	28.6062	30.6463	28.8593	30.6109	30.6095	30.5801	30.4379	30.2501	30.4541	30.2859	30.4666	30.4784
HNRH3	25.6792	26.925	28.1998	27.7225	27.412	27.3029	26.4217	26.4169	27.3116	25.4995	28.1545	27.4662	27.4122	27.532	27.2584	28.9119	28.515	28.2634	27.4904	27.3144	27.7455	28.0281	26.867	27.3769	27.9289	27.3526	27.7528	27.9237	28.2414	29.1605	25.1072	27.2575	27.4683	28.2536	26.6475	26.9317	28.3381	26.8178	27.9143	28.1573	27.7796	27.3617	28.6428	28.574	28.5539	28.6183	28.7508	29.0139	28.1031
HNRH1	30.6181	30.8345	31.1651	30.7396	31.2081	30.8106	31.3754	30.974	29.1455	27.5866	31.3783	31.26	31.2375	30.8086	31.1462	31.537	30.8739	30.3842	29.5167	29.4354	29.0674	27.0413	30.207	28.8013	30.6081	30.5892	30.3689	29.5025	30.9079	30.4416	29.9898	29.8472	30.5064	30.6806	29.7991	29.7113	30.9181	31.0985	31.3035	30.5246	30.6172	30.4464	31.2721	31.1433	31.1366	31.0204	31.3194	31.1068	31.0749
1433B	31.4104	32.1833	31.1515	31.5457	30.6805	30.8833	32.3893	30.3351	30.8914	30.2271	32.2988	32.483	31.4275	31.792	31.5778	31.3238	31.6787	27.3252	31.295	31.4302	30.8138	30.3721	31.0326	28.5113	29.9035	29.5147	29.979	30.518	30.1459	27.6201	30.7373	30.6304	31.0237	30.7868	30.542	29.7823	30.342	30.8992	30.3069	29.2261	32.6574	32.6024	32.8814	32.9153	32.2772	31.816	32.8283	32.3581	32.8649
S10AB	28.4725	28.4878	29.6509	29.5258	30.4867	27.756	29.4938	22.9139	26.5418	28.3152	26.2508	27.4378	29.5172	23.1344	30.6586	28.7503	23.2421	23.3299	23.033	23.081	20.8212	19.6864	20.1263	21.2937	24.6509	22.832	26.2713	24.2401	29.2118	26.9556	25.7699	28.805	28.2695	26.5359	27.5638	25.2944	27.0921	27.5305	28.9392	26.9877	27.3669	27.3997	28.5622	28.893	30.0744	29.789	29.6217	29.0576	26.3191
FCG2B	20.2389	20.4712	18.8613	19.5268	20.4196	21.1957	20.5164	21.0917	24.9073	23.7683	21.079	22.0276	20.7204	22.1867	20.0228	22.4421	20.8719	24.3687	22.0592	21.5544	19.7477	24.6878	24.3155	20.6685	21.0447	21.4263	21.0829	21.464	21.1178	21.6005	23.1031	20.1262	20.7935	20.9444	20.7891	21.6462	20.0892	19.9328	20.9487	20.9249	22.4655	22.8801	25.2655	24.2113	25.9645	24.0628	26.1952	26.3558	22.7308
L1CAM	22.995	21.0905	21.0579	21.3407	21.5891	21.4256	21.0644	21.4608	27.2947	28.2314	28.6699	27.4711	30.3925	29.5843	30.4001	28.4567	29.8081	29.4315	30.0144	29.5736	26.3098	26.7981	30.2749	30.5608	28.2175	28.1134	30.1788	30.2764	28.79	28.062	29.2723	30.4989	31.344	29.5246	30.2427	29.3445	30.4088	28.2922	29.6893	29.0916	33.6203	33.5618	32.4097	32.3381	32.2811	32.1428	31.8902	31.7807	32.3127
ARRB2	25.5812	24.9649	22.3363	20.1137	19.2699	22.403	21.0055	21.8745	25.3811	25.8726	22.6494	25.5702	24.6738	23.974	24.0176	24.0744	24.8447	21.4025	23.6846	24.9018	25.1926	24.5012	25.5095	24.4846	22.0309	22.2559	24.5836	20.2941	24.3099	23.9177	23.9577	20.2861	25.4716	25.9819	25.1933	23.7148	24.6963	25.1937	23.6073	23.6041	25.5132	25.0271	25.671	25.1696	25.7045	26.3123	25.7051	25.9146	26.218
CDD	20.5343	20.6997	21.8457	21.2292	21.7608	21.466	19.1963	20.2171	21.1592	21.2302	19.8291	22.4617	21.9027	21.3669	20.3489	20.6656	20.7529	21.3159	23.2213	23.0221	21.3732	21.315	20.9373	20.5383	21.0018	20.5252	20.0401	21.0511	22.048	21.2934	21.1899	20.7437	22.2889	22.1242	20.0713	20.9284	22.9404	20.739	21.2299	21.618	23.0569	23.3253	23.9712	23.3266	21.0597	22.9649	21.2984	21.7334	21.0947
DCTD	28.0997	28.2491	28.0183	28.0546	29.1055	27.9041	27.4931	26.4816	21.7214	23.0581	25.2397	24.4378	26.1058	25.9491	26.3458	21.8648	23.7286	24.5252	21.2262	20.2581	25.6332	26.0488	21.4228	19.8838	22.8036	23.5746	22.0171	23.6884	22.2375	22.146	20.7065	23.0394	21.4919	24.072	26.0944	21.6873	24.0109	23.8972	20.6648	20.6082	21.6269	25.143	25.7612	25.6129	24.9165	24.8722	25.4517	25.5828	21.4858
P5CR1	27.9248	28.0835	29.9251	29.501	30.1893	29.772	29.2747	29.1324	26.1838	23.0586	23.2504	26.3881	27.388	26.0923	24.1911	25.8643	24.2221	23.6015	21.2916	21.8029	20.4713	20.9768	21.6871	20.3866	25.6995	26.5953	27.4179	24.2408	26.2215	26.1204	28.1664	27.6764	28.3734	25.2104	27.0624	27.8758	26.3829	26.4186	25.0399	23.9861	25.4273	26.4854	27.2721	26.515	23.5145	26.9304	25.5301	27.0995	27.6378
NAC1	21.9875	20.9349	24.2647	21.1376	24.9007	21.3537	24.5476	21.9612	20.6777	21.0435	20.7926	25.0989	24.4086	21.3962	20.2081	20.7573	20.5169	20.5308	23.5335	20.596	22.1889	21.3418	19.2506	21.7203	18.4572	22.2335	20.8656	22.3782	20.1076	20.3675	21.5336	19.6484	19.9542	21.6665	20.7771	21.9005	22.0507	20.2479	19.2985	20.5569	23.9213	25.29	20.1792	20.9995	25.0464	21.0716	25.0389	24.6295	20.8248
GBP1	29.0367	28.9944	30.2157	28.6078	29.4599	27.6369	28.7059	27.7718	28.2253	27.9947	29.6601	27.0408	29.9482	26.7106	29.8099	27.1342	23.4147	27.4062	26.6381	27.5402	28.1178	28.1669	23.3582	27.6711	26.7441	26.5453	22.2935	22.0849	26.2948	21.9561	25.7834	26.1713	26.4694	23.4321	27.6117	26.1677	27.4098	23.5644	26.9457	24.2528	28.5628	28.9779	28.8253	29.0194	29.0378	29.2229	29.7395	29.6715	26.6585
GBP2	25.0989	24.7708	25.9867	26.1466	25.4035	25.6699	25.5116	25.9549	23.5462	25.6761	27.5341	26.6129	28.3017	27.2111	27.8304	26.9176	24.3142	23.9367	23.3684	25.0719	20.9523	21.781	22.7094	22.9459	28.0155	26.1993	24.5246	21.5987	22.523	22.4134	22.6262	19.4396	22.8247	27.3171	24.9743	23.8311	26.5066	26.2165	27.0689	26.7086	28.3944	29.1245	28.8846	29.1651	28.9359	29.2506	29.3933	29.1731	27.5581
[truncated: 6,837 more rows]
[truncated: 81 more columns]
