# Supplementary material for: Landscape of Bone Marrow Metastasis in Human Neuroblastoma Unraveled by Transcriptomics and Deep Multiplex Imaging
Source: Cancers (Basel). 2021 Aug 26;13(17):4311. doi: 10.3390/cancers13174311 (PMC8431445; doi:10.3390/cancers13174311)
Supplement: Supplementary file 1 [file cancers-13-04311-s001.zip › cancers-1331004 - SUPPLMENTARY/Table_S10.xlsx]

## Sheet: DE_results_signif
ensembl_id	hgnc_symbol	description	entrezgene	baseMean	MeanExpr_no	MeanExpr_yes	log2FoldChange	lfcSE	FoldChange	pvalue	padj	gene_biotype	chromosome_name	start_position	end_position	strand	no-BMn_121_DX	no-BMn_137_DX	no-BMn_139_DX	no-BMn_247_DX	no-BMn_366_DX_2	no-BMn_397_DX	no-BMn_507_DX	no-BMn_524_DX	no-BMn_528_DX	no-BMn_529_DX	no-BMn_626_DX_2	no-BMn_693_DX	no-BMn_696_DX	no-BMn_723_DX	no-BMn_960_DX	no-BMn_962_DX	no-BMn_963_DX	no-BMn_964_DX	no-BMn_966_DX	no-BMn_978_DX	no-BMn_990_DX	yes-MNC_001_DX	yes-MNC_002_DX	yes-MNC_003_DX	yes-MNC_004_DX	yes-MNC_005_DX	yes-MNC_006_DX	yes-MNC_007_DX	yes-MNC_008_DX	yes-MNC_010_DX	yes-MNC_027_DX	yes-MNC_028_DX	yes-MNC_030_DX
ENSG00000287535		novel transcript		48.6491	2.33029	105.908	7.16473	0.942406	143.482	8.02683e-14	1.56587e-09	lncRNA	8	41566858	41568641	1	2.85718	3.11597	2.58948	1.1919	1.63602	3.26298	0	4.45096	1.74095	1.91222	8.62542	7.32698	0	5.52993	0	0	1.07409	0.618926	0	3.00306	0	56.5425	40.6468	22.373	19.7409	164.041	14.9827	37.6477	110.59	171.749	70.3922	20.5732	20.1316
ENSG00000166923	GREM1	gremlin 1, DAN family BMP antagonist [Source:HGNC Symbol;Acc:HGNC:2001]	26585	18.2704	9.21639	29.4628	3.72981	0.542103	13.2673	2.21437e-12	2.1599e-08	protein_coding	15	32718004	32745106	1	11.4287	7.78993	11.0053	4.76758	11.4521	10.6047	7.66363	7.41827	20.0209	13.3856	7.84129	8.65916	8.99108	10.2699	4.00238	4.61493	4.83342	4.95141	13.0167	11.0112	9.81601	23.9218	15.6334	4.47459	9.11116	29.1287	13.8302	11.7649	16.5885	22.7106	10.3518	4.57182	10.8401
ENSG00000125538	IL1B	interleukin 1 beta [Source:HGNC Symbol;Acc:HGNC:5992]	3553	15218.1	333.606	33619.2	7.83109	1.14097	227.716	3.19827e-11	2.07973e-07	protein_coding	2	112829751	112836816	-1	118.097	137.103	503.653	187.128	270.352	537.577	374.751	666.655	183.67	428.338	276.797	94.5847	125.126	268.597	842.501	113.066	354.988	228.384	56.6608	1150.17	87.5261	33640.6	11387.4	754.715	531.485	4393.84	283.519	2402.39	61081.4	123214	32469.4	3037.97	1550.13
ENSG00000287494		novel transcript		25.935	0.338862	57.5843	5.42844	0.890684	43.0647	1.88584e-10	9.19726e-07	lncRNA	15	64878428	64882385	-1	0	0	3.23685	0	0	1.63149	0	0	0	0	0	0	2.24777	0	0	0	0	0	0	0	0	63.0667	71.9137	35.7967	39.4817	32.1949	10.3726	62.354	103.678	76.6483	66.2515	114.296	20.1316
ENSG00000115009	CCL20	C-C motif chemokine ligand 20 [Source:HGNC Symbol;Acc:HGNC:10619]	6364	432.227	1.18744	965.022	11.0963	1.63726	2189.4	4.0623e-10	1.58495e-06	protein_coding	2	227805739	227817564	1	0	0.778993	1.94211	0	0	0.815746	0	0	10.4457	2.86833	0	0	0	0	3.00178	3.84578	0	1.23785	0	0	0	989.495	199.065	8.94918	4.55558	116.515	6.91509	38.8242	2296.12	2606.04	881.973	64.0055	27.8745
ENSG00000111912	NCOA7	nuclear receptor coactivator 7 [Source:HGNC Symbol;Acc:HGNC:21081]	135112	1435.17	1255.87	1657.54	1.70732	0.293326	3.26554	9.2553e-10	3.00921e-06	protein_coding	6	125781161	125932034	1	1089.54	1267.42	1177.56	1250.89	970.569	1561.34	1833.91	1168.13	1042.83	1778.37	1176.19	1195.63	976.282	934.559	1146.68	1372.94	916.201	1563.41	1293.24	1189.21	1468.31	1510.34	1129.77	1327.46	1081.19	861.598	1066.08	1034.14	1794.32	1757.23	1366.44	1001.23	1162.99
ENSG00000136689	IL1RN	interleukin 1 receptor antagonist [Source:HGNC Symbol;Acc:HGNC:6000]	3557	2418.38	343.608	4983.12	5.28899	0.876793	39.0972	1.81888e-09	5.06895e-06	protein_coding	2	113107214	113134016	1	99.049	255.51	404.606	161.502	287.94	681.148	563.277	501.475	115.773	816.519	341.88	377.007	215.786	230.677	440.262	202.288	297.524	290.895	228.94	475.484	228.222	4363.56	1111.01	462.375	200.446	3490.85	247.791	891.78	12583.7	8266.66	4985.42	1021.8	63.4919
ENSG00000115008	IL1A	interleukin 1 alpha [Source:HGNC Symbol;Acc:HGNC:5991]	3552	621.349	1.47032	1387.61	10.9939	1.70759	2039.42	4.15276e-09	9.00134e-06	protein_coding	2	112773925	112784493	-1	0	3.11597	7.12106	0	0	0	0	1.48365	0	6.69278	0.784129	0	0	1.57998	6.00357	0	0	3.09463	0	1.00102	0	1798.49	224.079	17.8984	12.1482	27.5957	1.15252	23.5298	2311.32	5213.5	476.182	6.85773	34.0688
ENSG00000172893	DHCR7	7-dehydrocholesterol reductase [Source:HGNC Symbol;Acc:HGNC:2860]	1717	232.307	152.369	331.223	2.09557	0.374583	4.27395	4.06933e-09	9.00134e-06	protein_coding	11	71428193	71452868	-1	137.145	197.864	215.574	207.986	122.293	239.829	177.03	111.769	69.6379	93.6989	140.359	163.858	84.666	101.119	108.064	209.979	120.298	147.923	186.828	151.154	212.68	320.77	238.67	232.679	211.075	628.568	280.061	283.534	312.416	244.139	275.358	240.021	171.893
ENSG00000187775	DNAH17	dynein axonemal heavy chain 17 [Source:HGNC Symbol;Acc:HGNC:2946]	8632	270.404	13.7732	587.737	4.99409	0.859974	31.8691	5.5808e-09	1.0887e-05	protein_coding	17	78423697	78577396	-1	20.0003	6.23195	14.2421	2.97974	19.2232	16.3149	3.83181	3.95641	33.9485	54.4984	7.05716	1.99827	19.4807	2.36997	26.0155	4.61493	3.75932	10.5217	6.89118	28.0286	3.272	338.168	818.148	155.119	173.112	466.06	153.285	243.534	819.746	658.608	215.317	285.739	271.002
ENSG00000095794	CREM	cAMP responsive element modulator [Source:HGNC Symbol;Acc:HGNC:2352]	1390	1130.64	315.532	2138.86	3.4441	0.614362	10.8837	7.93924e-09	1.40799e-05	protein_coding	10	35126791	35212958	1	235.241	246.162	515.306	271.752	199.595	276.538	324.938	231.945	703.343	351.849	169.372	408.313	185.066	259.907	337.2	187.674	250.264	769.325	323.12	137.14	242.128	1784.35	2595.14	692.07	710.671	5476.2	753.745	1388.26	3453.16	2161.77	1728.75	498.328	1918.69
ENSG00000198324	PHETA1	PH domain containing endocytic trafficking adaptor 1 [Source:HGNC Symbol;Acc:HGNC:26509]	144717	185.995	173.431	201.652	-2.29266	0.46657	-4.8996	1.66114e-08	2.56393e-05	protein_coding	12	111360651	111369121	-1	132.383	132.429	143.716	171.037	194.687	201.489	139.478	264.585	85.3064	173.056	240.728	184.507	185.816	205.397	184.109	293.817	156.818	106.455	200.61	104.106	141.514	71.7655	329.344	246.103	405.447	332.681	190.165	236.475	96.766	126.328	287.78	230.877	260.162
ENSG00000077984	CST7	cystatin F [Source:HGNC Symbol;Acc:HGNC:2479]	8530	884.453	496.485	1364.23	2.73844	0.506914	6.67347	1.70859e-08	2.56393e-05	protein_coding	20	24949269	24959928	1	172.383	646.564	500.416	449.344	210.638	583.258	1285.96	453.504	805.188	629.121	483.023	287.751	192.559	414.745	488.29	453.802	310.95	489.571	499.228	697.711	372.19	667.637	908.822	1161.9	1187.49	2267.44	1161.74	1056.49	811.452	899.908	1952.35	1250.39	616.336
ENSG00000120217	CD274	CD274 molecule [Source:HGNC Symbol;Acc:HGNC:17635]	29126	144.428	44.602	267.806	4.38666	0.79131	20.9178	1.96734e-08	2.74134e-05	protein_coding	9	5450503	5470566	1	37.1434	34.2757	33.0158	36.9487	35.1745	38.3401	107.291	38.575	19.1504	31.5517	112.13	80.5968	27.7225	22.1197	53.0315	72.3006	17.7225	49.5141	51.301	15.0153	23.722	31.5333	112.56	44.7459	91.1116	78.1877	49.5582	107.061	564.007	472.665	82.8143	38.8605	55.749
ENSG00000261618	LINC02605	long intergenic non-protein coding RNA 2605 [Source:HGNC Symbol;Acc:HGNC:53974]		90.3546	12.7821	186.236	5.58815	0.997074	48.1062	2.81835e-08	3.66536e-05	lncRNA	8	78835307	78840525	1	10.4763	19.4748	9.06317	13.1108	8.99812	4.89447	15.3273	11.8692	26.9847	13.3856	12.5461	5.32871	5.99406	3.94995	52.0309	10.7682	21.4819	7.42711	15.3137	0	0	52.1931	71.9137	47.729	31.8891	15.3309	11.5252	32.9417	446.506	420.146	24.8443	4.57182	29.4231
ENSG00000078081	LAMP3	lysosomal associated membrane protein 3 [Source:HGNC Symbol;Acc:HGNC:14582]	27074	66.3713	17.8255	126.395	3.94815	0.734898	15.4352	3.80314e-08	4.424e-05	protein_coding	3	183122215	183163839	-1	3.80958	14.0219	17.479	11.919	14.7242	33.4456	57.4772	15.8256	18.2799	7.64889	21.9556	27.9757	7.49257	12.6398	12.0071	22.3055	21.4819	19.8056	26.0333	8.00816	0	83.7265	46.9002	46.2375	124.519	116.515	25.3553	110.59	158.973	229.945	97.3068	29.7168	77.4292
ENSG00000176171	BNIP3	BCL2 interacting protein 3 [Source:HGNC Symbol;Acc:HGNC:1084]	664	230.805	137.586	346.154	2.30099	0.442974	4.92797	4.151e-08	4.48277e-05	protein_coding	10	131966455	131982013	-1	102.859	122.302	108.111	122.765	146.424	110.941	174.731	147.871	86.1769	70.7523	184.27	180.51	65.9346	116.129	189.112	322.276	122.984	114.501	121.744	134.137	144.786	228.345	212.614	244.611	340.15	481.391	266.231	244.71	374.623	220.009	351.961	125.725	326.751
ENSG00000121053	EPX	eosinophil peroxidase [Source:HGNC Symbol;Acc:HGNC:3423]	8288	83.3817	37.5765	139.96	4.40302	0.817498	21.1564	4.82562e-08	4.48277e-05	protein_coding	17	58192726	58205174	1	57.1436	66.9934	23.9527	38.7366	17.5872	61.9967	3.83181	29.6731	17.4095	62.1472	7.05716	12.6557	47.2032	47.3994	5.00297	0	30.6116	43.3248	72.7402	101.103	42.536	38.0575	17.7179	16.4068	19.7409	16.864	43.7956	62.354	16.5885	56.7765	6.21108	41.1464	24.7773
ENSG00000287403		novel transcript, antisense to RPTOR		26.2855	0.738219	57.8785	5.63433	1.04599	49.671	4.80608e-08	4.48277e-05	lncRNA	17	80824170	80826900	-1	0.952394	0	0	0	0	0	0	0	0	0	0	0	0	0	1.00059	0	0	4.95141	4.59412	4.00408	0	50.0184	51.0691	68.6104	63.7782	22.9964	10.3726	43.5302	81.5599	88.0036	97.3068	64.0055	89.8178
ENSG00000104951	IL4I1	interleukin 4 induced 1 [Source:HGNC Symbol;Acc:HGNC:19094]	259307	395.082	27.1151	850.081	5.24593	0.957975	37.9475	4.69309e-08	4.48277e-05	protein_coding	19	49889654	49929539	-1	27.6194	20.2538	14.8895	2.38379	14.3152	70.1541	34.4863	5.93462	34.8189	60.235	21.9556	36.6349	8.99108	13.4298	54.0321	9.99902	13.4262	50.7519	32.1588	38.0387	4.908	420.807	383.539	146.17	98.7043	1195.81	32.2704	392.948	1122.49	897.069	327.117	132.583	74.332
ENSG00000285103		novel transcript		44.1122	5.77972	91.5103	4.12718	0.780284	17.4745	5.88531e-08	5.21867e-05	lncRNA	9	27529085	27543902	1	7.61915	7.01094	12.3	1.1919	2.45403	4.07873	13.0282	3.46186	0.870473	25.815	9.40954	3.99654	2.24777	2.36997	2.00119	3.07662	4.29637	11.1407	0	5.0051	0	59.8046	55.238	32.8137	82.0005	85.8531	33.423	83.5308	135.472	211.493	53.8293	98.2941	58.8462
ENSG00000119922	IFIT2	interferon induced protein with tetratricopeptide repeats 2 [Source:HGNC Symbol;Acc:HGNC:5409]	3433	1956.51	388.872	3894.09	5.24835	0.971102	38.0113	7.50824e-08	6.10295e-05	protein_coding	10	89283694	89309271	1	313.338	268.753	389.716	122.765	221.681	546.55	2592.61	297.225	154.944	292.57	219.556	458.269	394.109	106.649	215.128	271.512	176.151	186.916	290.961	482.491	164.418	10714.8	497.142	590.646	501.114	1169.75	124.472	476.479	2702.54	3869.32	904.747	434.323	218.35
ENSG00000180758	GPR157	G protein-coupled receptor 157 [Source:HGNC Symbol;Acc:HGNC:23687]	80045	181.396	62.0637	328.964	3.47129	0.682285	11.0908	1.39056e-07	0.00010217	protein_coding	1	9100305	9129102	-1	23.8098	57.6455	45.3158	70.3218	49.0806	45.6818	40.6172	62.3135	142.758	52.5861	63.5144	65.2767	23.9762	33.1796	43.0256	147.678	65.5197	55.7034	57.4265	27.0275	130.88	168.54	289.739	80.5427	156.408	113.449	82.9811	228.239	452.035	614.606	103.518	114.296	85.1721
ENSG00000163082	SGPP2	sphingosine-1-phosphate phosphatase 2 [Source:HGNC Symbol;Acc:HGNC:19953]	130367	137.299	11.6595	292.669	4.02644	0.784205	16.2959	1.41408e-07	0.00010217	protein_coding	2	222424543	222562621	1	1.90479	1.55799	16.8316	10.1311	12.6792	7.34171	21.4582	12.8583	13.9276	9.56112	32.9334	13.9879	2.24777	2.36997	8.00476	28.4587	4.83342	20.4246	17.6108	0	5.72601	132.658	141.743	292.34	264.224	147.177	119.862	271.769	443.741	290.98	242.232	166.871	278.745
ENSG00000124107	SLPI	secretory leukocyte peptidase inhibitor [Source:HGNC Symbol;Acc:HGNC:11092]	6590	48.6859	14.8844	90.4233	5.16757	0.978644	35.9413	1.41304e-07	0.00010217	protein_coding	20	45252239	45254564	-1	2.85718	12.4639	23.9527	38.7366	7.36209	4.89447	13.7945	5.44007	0	14.3417	7.84129	3.33045	2.24777	10.2699	44.0262	26.9204	2.68523	11.7596	10.7196	28.0286	40.9	9.78621	3.12668	1.49153	10.6297	7.66546	17.2877	10.5884	15.2061	9.93589	0	29.7168	0
ENSG00000134460	IL2RA	interleukin 2 receptor subunit alpha [Source:HGNC Symbol;Acc:HGNC:6008]	3559	147.119	40.0348	279.489	4.45569	0.867345	21.943	1.938e-07	0.000135023	protein_coding	10	6010689	6062370	-1	11.4287	18.6958	20.0684	37.5447	24.1313	38.3401	76.6363	45.0042	62.6741	13.3856	80.7653	37.301	7.49257	33.9696	4.00238	159.215	49.9453	43.9438	13.0167	1.00102	62.1681	44.5816	281.401	74.5765	154.89	131.846	35.728	167.062	653.862	264.011	161.488	107.438	58.8462
ENSG00000073756	PTGS2	prostaglandin-endoperoxide synthase 2 [Source:HGNC Symbol;Acc:HGNC:9605]	5743	5401.34	486.428	11477.4	5.76143	1.09853	54.2454	2.33009e-07	0.000152166	protein_coding	1	186671791	186680423	-1	173.336	489.208	1408.68	472.586	193.05	1106.97	160.17	406.521	163.649	503.871	371.677	143.875	576.179	119.289	815.485	163.83	533.824	186.297	127.87	1465.49	633.133	6328.42	1369.49	414.646	270.298	1142.15	185.555	1917.68	37995.9	32291.7	11341.4	2439.07	222.996
ENSG00000275302	CCL4	C-C motif chemokine ligand 4 [Source:HGNC Symbol;Acc:HGNC:10630]	6351	1531	141.311	3249.44	4.67369	0.912219	25.5224	2.34006e-07	0.000152166	protein_coding	17	36103827	36105621	1	49.5245	44.4026	258.3	161.502	88.7541	51.392	531.856	97.9212	72.2493	92.7428	244.648	45.9602	93.6571	30.8096	345.205	175.367	154.132	107.693	173.045	33.0337	115.338	3906.87	737.897	1807.74	990.08	1364.45	319.247	3344.76	7332.1	11028.8	6209	454.896	413.472
ENSG00000081181	ARG2	arginase 2 [Source:HGNC Symbol;Acc:HGNC:664]	384	47.6398	20.7976	80.8325	2.86117	0.583771	7.26604	2.42348e-07	0.000152507	protein_coding	14	67619920	67651708	1	34.2862	24.1488	10.3579	22.0501	12.6792	46.4975	21.4582	8.90193	23.5028	22.9467	9.40954	30.6401	20.2299	17.3798	35.0208	10.7682	12.3521	9.90282	18.3765	27.0275	18.814	86.9885	95.8849	38.7798	150.334	88.9193	11.5252	55.2951	176.943	22.7106	55.8997	52.5759	48.0061
ENSG00000237989	LINC01679	long intergenic non-protein coding RNA 1679 [Source:HGNC Symbol;Acc:HGNC:52469]	101928399	53.8863	9.57943	108.686	3.65938	0.736073	12.6352	2.5644e-07	0.000156332	lncRNA	21	43358147	43362349	-1	3.80958	3.89497	25.2474	10.7271	4.49906	13.8677	13.7945	4.94551	12.1866	19.1222	8.62542	9.99134	11.9881	2.36997	10.0059	16.1523	5.37046	12.3785	9.18824	3.00306	0	85.9012	61.4914	70.1019	121.482	219.232	10.3726	114.12	163.12	82.326	124.222	48.0041	105.304
ENSG00000117475	BLZF1	basic leucine zipper nuclear factor 1 [Source:HGNC Symbol;Acc:HGNC:1065]	8548	522.275	482.738	571.395	1.4835	0.312855	2.79626	3.20848e-07	0.000189669	protein_coding	1	169367970	169396540	1	337.147	447.142	447.332	603.099	495.305	633.019	673.633	563.294	502.263	530.642	547.322	369.68	371.631	498.484	531.316	494.567	438.767	454.911	376.718	402.41	418.816	544.766	442.946	353.493	511.744	354.144	418.363	357.653	698.097	424.405	409.931	315.456	363.917
ENSG00000260231	KDM7A-DT	KDM7A divergent transcript [Source:HGNC Symbol;Acc:HGNC:48959]	100134229	216.58	89.6746	373.511	2.79849	0.583313	6.95713	4.21676e-07	0.000236547	lncRNA	7	140177184	140179640	1	51.4293	78.6783	76.3896	135.876	109.204	111.757	122.618	95.943	119.255	43.025	102.721	90.5881	32.9673	103.489	80.0476	156.139	119.224	56.9412	78.1	59.0602	59.7141	203.336	318.921	158.102	244.483	300.486	123.319	107.061	720.215	831.776	612.826	176.015	94.4636
ENSG00000129646	QRICH2	glutamine rich 2 [Source:HGNC Symbol;Acc:HGNC:25326]	84074	129.311	129.968	128.586	-2.51595	0.601234	-5.71973	4.24398e-07	0.000236547	protein_coding	17	76274049	76307998	-1	145.716	89.5842	183.206	204.41	179.962	113.389	206.918	132.045	8.70473	56.4106	220.34	126.557	117.633	120.079	142.084	211.518	114.928	41.4681	103.368	116.118	94.8881	147.881	130.278	186.441	133.63	110.383	108.336	196.474	225.326	69.5512	184.262	164.586	161.053
ENSG00000088881	EBF4	EBF family member 4 [Source:HGNC Symbol;Acc:HGNC:29278]	57593	51.8966	18.2073	93.564	3.24859	0.674105	9.5044	4.55391e-07	0.000246771	protein_coding	20	2692874	2760108	1	9.52394	14.8009	12.3	7.74732	8.99812	8.15746	17.6263	9.39648	49.617	40.1567	14.8984	29.974	8.99108	7.10991	16.0095	39.2269	11.278	9.90282	45.1755	10.0102	11.452	66.3288	60.4492	34.3052	30.3705	111.916	39.1855	95.2957	233.621	102.198	136.644	32.0027	30.9717
ENSG00000122643	NT5C3A	5'-nucleotidase, cytosolic IIIA [Source:HGNC Symbol;Acc:HGNC:17820]	51251	919.244	834.238	1024.84	1.49273	0.322529	2.81421	5.6309e-07	0.000286612	protein_coding	7	33014114	33062797	-1	625.723	800.805	732.822	725.268	658.089	1005	1024.63	761.115	1642.58	844.246	602.995	887.231	627.128	694.401	1176.7	808.382	992.462	1088.69	613.315	407.415	800.005	777.46	695.165	699.528	1073.6	794.142	646.561	632.952	843.246	888.553	931.661	562.334	930.699
ENSG00000132965	ALOX5AP	arachidonate 5-lipoxygenase activating protein [Source:HGNC Symbol;Acc:HGNC:436]	241	1161.14	904.044	1479.45	2.04585	0.438602	4.12915	5.65743e-07	0.000286612	protein_coding	13	30713478	30764426	1	283.813	810.932	950.338	837.902	808.603	619.151	876.719	768.533	1119.43	1721.96	776.287	558.183	507.247	644.632	1263.75	1409.09	741.661	838.026	527.558	979.998	1941.12	914.467	1479.96	1073.9	894.413	1534.62	818.286	634.128	1347.81	953.846	834.354	1202.39	483.158
ENSG00000076351	SLC46A1	solute carrier family 46 member 1 [Source:HGNC Symbol;Acc:HGNC:30521]	113235	61.673	65.6891	56.7408	-4.14776	0.985391	-17.7256	5.72988e-07	0.000286612	protein_coding	17	28394642	28407197	-1	20.9527	49.8556	53.7316	99.5232	122.702	68.5226	139.478	182.489	17.4095	9.56112	110.562	11.9896	19.4807	111.389	25.0149	66.9165	128.891	14.2353	26.0333	23.0235	77.7101	71.7655	65.6603	85.0173	69.8523	84.3201	58.7783	100.002	38.7064	38.3242	105.588	48.0041	60.3948
ENSG00000171174	RBKS	ribokinase [Source:HGNC Symbol;Acc:HGNC:30325]	64080	221.132	47.9809	435.31	3.29513	0.693518	9.81599	6.95584e-07	0.000330962	protein_coding	2	27781379	27890681	-1	27.6194	58.4245	108.111	66.1502	33.1294	103.6	36.0191	34.1241	72.2493	58.3228	35.2858	24.6453	32.9673	37.9195	81.0482	44.611	26.8523	24.757	19.9079	45.0459	36.81	162.016	164.672	207.323	88.0746	286.688	101.421	511.773	671.832	712.545	869.551	219.447	538.907
ENSG00000101442	ACTR5	actin related protein 5 [Source:HGNC Symbol;Acc:HGNC:14671]	79913	400.073	451.727	336.595	-1.16711	0.26983	-2.24562	6.78799e-07	0.000330962	protein_coding	20	38748460	38772520	1	511.435	412.866	529.548	377.831	390.6	336.087	387.013	395.641	349.06	475.187	401.474	412.975	745.511	361.816	438.261	509.181	408.692	423.964	594.939	693.707	330.472	334.906	341.85	328.137	426.706	430.799	334.23	444.713	276.474	271.108	416.142	432.037	427.409
ENSG00000090104	RGS1	regulator of G protein signaling 1 [Source:HGNC Symbol;Acc:HGNC:9991]	5996	3362.55	762.317	6579.16	3.61158	0.766245	12.2234	1.03546e-06	0.000448883	protein_coding	1	192575763	192580024	1	1506.69	576.455	1040.97	439.809	204.503	379.322	1225.41	69.2372	383.008	1318.48	279.934	488.243	1552.46	43.4495	530.315	606.094	129.965	1753.42	2143.92	735.749	601.231	8659.71	4256.45	4508.9	3084.13	10273.2	1162.89	4711.85	8827.82	4119.14	4728.7	3111.12	10211.4
ENSG00000173559	NABP1	nucleic acid binding protein 1 [Source:HGNC Symbol;Acc:HGNC:26232]	64859	1644.33	958.09	2493.18	2.56428	0.557306	5.9146	9.90998e-07	0.000448883	protein_coding	2	191678068	191741097	1	267.623	784.446	571.627	1197.26	611.463	1190.17	1419.3	1089.99	895.717	828.949	1645.89	736.695	338.664	591.703	894.532	1368.33	1074.09	953.146	425.722	886.903	2347.66	1832.2	1369.49	711.46	1243.67	2521.94	675.374	1148.25	4347.56	4209.98	2308.45	1387.55	1209.44
ENSG00000121797	CCRL2	C-C motif chemokine receptor like 2 [Source:HGNC Symbol;Acc:HGNC:1612]	9034	347.743	89.502	667.077	3.26964	0.698798	9.64406	9.94228e-07	0.000448883	protein_coding	3	46407166	46412997	1	63.8104	85.6893	109.405	58.9988	84.2551	72.6014	127.216	117.209	166.26	101.348	53.3208	69.9394	57.6928	40.2895	167.099	69.9931	59.0751	157.207	94.1795	56.0571	67.8941	411.021	466.918	102.916	302.187	444.597	74.9135	131.767	1748.7	1453.48	577.63	196.588	89.8178
ENSG00000111266	DUSP16	dual specificity phosphatase 16 [Source:HGNC Symbol;Acc:HGNC:17909]	80824	876.655	206.517	1705.43	3.1754	0.680732	9.03422	1.01782e-06	0.000448883	protein_coding	12	12473282	12562863	-1	93.3346	114.512	98.4001	135.876	92.4352	124.809	375.518	81.601	380.397	274.404	307.378	374.342	65.1853	59.2493	305.181	352.273	87.0015	482.143	275.647	100.102	157.056	1160.21	2785.87	492.205	552.744	2446.81	765.27	915.31	4317.14	2623.08	1140.77	761.208	1060.78
ENSG00000152784	PRDM8	PR/SET domain 8 [Source:HGNC Symbol;Acc:HGNC:13993]	56978	730.674	203.483	1382.53	3.45015	0.735781	10.9295	1.05888e-06	0.000449056	protein_coding	4	80183879	80204329	1	251.432	189.295	165.079	194.279	185.279	323.035	250.601	130.067	371.692	290.658	151.337	125.891	152.848	109.019	188.112	314.585	268.523	136.164	166.154	205.209	103.886	268.577	735.812	399.73	654.485	418.534	243.181	509.42	3657.75	3750.09	503.097	235.449	424.312
ENSG00000125462	MIR9-1HG	MIR9-1 host gene [Source:HGNC Symbol;Acc:HGNC:30780]	10485	42.5498	7.73178	85.6094	3.45187	0.743626	10.9425	1.14377e-06	0.000464847	lncRNA	1	156404250	156456763	-1	5.71436	3.89497	14.8895	3.57569	6.95309	11.4204	6.89727	5.44007	3.48189	22.9467	20.3873	3.33045	11.9881	3.15996	8.00476	0.769155	3.22228	10.5217	6.12549	8.00816	1.636	97.8621	50.0269	28.3391	33.4076	76.6546	32.2704	31.7652	192.15	96.5201	82.8143	38.8605	20.1316
ENSG00000170482	SLC23A1	solute carrier family 23 member 1 [Source:HGNC Symbol;Acc:HGNC:10974]	9963	178.58	192.618	161.389	-2.30158	0.584335	-4.92998	1.12029e-06	0.000464847	protein_coding	5	139367196	139384553	-1	385.719	176.831	154.074	199.642	341.11	127.256	180.862	293.269	101.845	92.7428	94.0954	187.171	292.21	361.026	156.093	197.673	214.281	48.2762	71.9746	214.218	154.602	178.327	145.912	277.425	246.001	116.515	225.893	175.297	186.62	88.0036	196.684	118.867	325.203
ENSG00000123610	TNFAIP6	TNF alpha induced protein 6 [Source:HGNC Symbol;Acc:HGNC:11898]	7130	389.135	43.0094	816.945	5.7564	1.16606	54.0566	1.21338e-06	0.000472208	protein_coding	2	151357592	151380046	1	5.71436	40.5077	13.5948	41.1204	27.4034	43.2345	76.6363	18.2984	49.617	17.21	49.4001	11.3235	24.7255	37.9195	88.0523	255.36	24.1671	22.9003	5.35981	22.0224	28.63	240.306	90.6737	58.1697	3.03705	53.6582	41.4906	54.1186	2117.79	1845.24	231.88	50.29	17.0344
ENSG00000231233	CFAP58-DT	CFAP58 divergent transcript [Source:HGNC Symbol;Acc:HGNC:45243]		15.9827	3.24949	31.7239	4.43682	0.935487	21.6578	1.2345e-06	0.000472208	lncRNA	10	104351591	104353575	-1	0	2.33698	0.647369	5.36353	4.49906	4.89447	1.53273	9.39648	5.22284	2.86833	6.27303	0	2.99703	4.73994	5.00297	0	2.68523	3.71356	3.06275	3.00306	0	33.7081	3.12668	22.373	12.1482	9.19855	6.91509	10.5884	99.5307	82.326	24.8443	11.4296	0
ENSG00000277895		novel transcript, antisense to TBK1		17.6699	0.76964	38.5666	4.54567	0.99084	23.3551	1.599e-06	0.000588552	lncRNA	12	64451591	64452901	-1	0	1.55799	1.94211	1.1919	0	2.44724	0	0.989103	0	2.86833	0.784129	0	2.99703	0	0	0	0	0.618926	0.765687	0	0	29.3586	17.7179	31.3221	12.1482	22.9964	1.15252	12.9414	88.4717	80.9066	33.1257	96.0082	17.0344
ENSG00000163734	CXCL3	C-X-C motif chemokine ligand 3 [Source:HGNC Symbol;Acc:HGNC:4604]	2921	1480.2	104.048	3181.48	5.85618	1.19837	57.9276	1.64053e-06	0.000592655	protein_coding	4	74036589	74038807	-1	73.3343	63.0985	90.6317	29.7974	32.7204	156.623	6.1309	30.1676	183.67	262.931	10.1937	65.2767	70.4301	12.6398	828.493	23.8438	13.4262	111.407	24.502	67.0683	28.63	1004.72	3040.18	88.0003	91.1116	927.521	46.1006	345.888	7309.98	8862.82	2718.38	230.877	61.9433
ENSG00000225032		novel transcript	102723566	213.475	238.015	183.307	-1.74874	0.443076	-3.36065	1.70247e-06	0.00060385	lncRNA	9	127816066	127822520	1	337.147	232.14	203.921	232.42	287.531	145.203	219.18	250.738	107.068	124.294	336.391	251.782	260.741	327.846	165.098	352.273	199.781	173.299	203.673	226.23	361.556	121.784	289.739	222.238	259.668	114.982	170.572	191.768	77.4128	227.106	192.543	173.729	261.711
ENSG00000132669	RIN2	Ras and Rab interactor 2 [Source:HGNC Symbol;Acc:HGNC:18750]	54453	1226.54	335.943	2327.59	3.8981	0.841519	14.9089	1.80117e-06	0.00062745	protein_coding	20	19757606	20002459	1	129.526	409.751	367.706	154.946	296.12	419.293	500.435	432.733	260.272	597.57	431.271	392.327	242.01	184.068	602.358	236.9	370.025	397.351	133.229	306.312	190.594	2085.55	1052.65	181.967	239.927	809.472	304.264	690.6	3230.6	4745.1	641.811	1090.38	96.0122
ENSG00000134470	IL15RA	interleukin 15 receptor subunit alpha [Source:HGNC Symbol;Acc:HGNC:5978]	3601	260.657	170.632	372.062	1.91674	0.438719	3.77569	2.10118e-06	0.000706721	protein_coding	10	5943639	5978187	-1	151.431	161.252	124.942	115.018	113.294	181.096	257.498	198.315	369.081	177.837	146.632	181.842	88.4123	109.019	199.118	87.6837	156.818	292.133	196.781	104.106	170.962	473	210.53	283.391	375.076	176.306	224.741	189.415	496.271	584.798	285.709	237.735	188.927
ENSG00000152778	IFIT5	interferon induced protein with tetratricopeptide repeats 5 [Source:HGNC Symbol;Acc:HGNC:13328]	24138	739.17	436.663	1113.31	2.96147	0.659571	7.78915	2.08555e-06	0.000706721	protein_coding	10	89414568	89420997	1	671.438	551.527	452.511	264.601	359.925	420.925	765.597	351.132	482.242	356.63	362.267	1061.75	626.379	154.838	293.174	269.204	213.207	225.908	663.85	404.412	218.406	1868.08	389.793	457.9	607.411	536.582	523.242	442.361	812.834	732.417	378.876	324.599	481.609
ENSG00000232949		novel transcript, antisense to STEAP1B		13.2515	0.0430265	29.5905	7.24019	1.57816	151.187	2.50216e-06	0.000827323	lncRNA	7	22589698	22602536	1	0	0	0	0	0.409005	0	0	0.494551	0	0	0	0	0	0	0	0	0	0	0	0	0	17.3977	1.04223	4.47459	88.0746	13.7978	5.76258	14.1179	66.3538	51.0989	26.9147	4.57182	153.31
ENSG00000108556	CHRNE	cholinergic receptor nicotinic epsilon subunit [Source:HGNC Symbol;Acc:HGNC:1966]	1145	88.4764	40.7944	147.462	2.55622	0.587897	5.88165	3.03765e-06	0.00098764	protein_coding	17	4897771	4934438	-1	42.8577	39.7287	55.6738	16.6865	14.3152	56.2865	23.7573	24.7276	57.4512	102.304	25.8762	56.6176	22.4777	12.6398	22.0131	28.4587	17.1855	82.9361	65.0834	65.0663	24.54	163.104	96.9271	62.6443	57.704	187.037	32.2704	174.121	116.119	319.368	159.418	118.867	86.7207
ENSG00000112096	SOD2	superoxide dismutase 2 [Source:HGNC Symbol;Acc:HGNC:11180]	6648	18783.2	5796.47	34843.3	3.13735	0.709611	8.79909	3.1903e-06	0.0010085	protein_coding	6	159669069	159762529	-1	7518.2	5899.32	7001.95	4325.98	3450.78	6075.67	7635.27	4403.49	6907.21	6330.41	3955.15	6026.78	8826.25	2864.5	11072.6	2812.03	3858.14	5819.14	4081.88	7626.77	5234.39	30793.9	13719.9	4595.41	4616.32	11815.5	5525.16	12788.5	76593	68976.4	27424	23247.7	3955.08
ENSG00000122862	SRGN	serglycin [Source:HGNC Symbol;Acc:HGNC:9361]	5552	19595.6	13628.3	26979.9	2.12602	0.495236	4.36512	3.36028e-06	0.0010085	protein_coding	10	69088103	69104805	1	6201.04	22378.9	22444.9	10603.7	8990.75	20713.4	13819.8	10858.9	17614.9	17630.7	8339.99	11773.1	9974.11	10203.5	19167.4	11948.1	9589.5	17319.4	7618.58	15128.4	13875.7	24023	16662.1	9700.92	5788.63	42212.2	16879.7	15087.3	27019.8	31902.7	15184	29938.6	3905.53
ENSG00000188916	INSYN2A	inhibitory synaptic factor 2A [Source:HGNC Symbol;Acc:HGNC:33859]	642938	27.7771	7.8937	52.365	3.21597	0.732789	9.29188	3.28349e-06	0.0010085	protein_coding	10	127135426	127196591	-1	5.71436	3.11597	5.17895	6.55542	4.49906	8.15746	20.6918	4.94551	15.6685	9.56112	4.70477	15.3201	4.49554	1.57998	10.0059	3.84578	8.59274	8.04604	16.0794	9.00918	0	23.9218	80.2515	61.1528	28.852	56.7244	49.5582	24.7063	42.8535	114.972	14.4925	6.85773	7.74292
ENSG00000258667	HIF1A-AS3	HIF1A antisense RNA 3 [Source:HGNC Symbol;Acc:HGNC:54284]	105370526	41.3593	2.00937	90.0268	4.30608	0.958586	19.7815	3.32098e-06	0.0010085	lncRNA	14	61707564	61751099	-1	0	0	0.647369	0.595948	3.27204	0.815746	3.06545	3.46186	0	0	8.62542	0.666089	2.24777	3.15996	0	0	0	0	0	5.0051	10.634	142.444	77.1248	90.9834	53.1485	78.1877	27.6604	61.1775	197.679	106.456	31.0554	146.298	122.338
ENSG00000277632	CCL3	C-C motif chemokine ligand 3 [Source:HGNC Symbol;Acc:HGNC:10627]	6348	1606.83	218.617	3323.15	5.13399	1.10098	35.1144	3.2748e-06	0.0010085	protein_coding	17	36088256	36090169	-1	106.668	183.063	452.511	67.938	73.2119	294.484	173.964	113.252	110.55	288.746	291.696	109.905	76.4242	60.8293	923.549	33.0737	127.817	148.542	96.4765	801.817	56.4421	3577.4	487.762	290.848	127.556	1278.6	58.7783	569.422	11588.4	8258.15	1805.35	294.882	130.081
ENSG00000114023	FAM162A	family with sequence similarity 162 member A [Source:HGNC Symbol;Acc:HGNC:17865]	26355	340.241	314.045	372.845	1.45616	0.344474	2.74378	3.4979e-06	0.00103389	protein_coding	3	122384176	122412334	1	362.862	282.775	343.753	312.872	331.703	261.854	261.33	268.541	374.304	285.877	263.467	345.034	265.986	378.405	318.189	297.663	350.691	271.709	367.53	291.297	359.102	450.166	198.023	456.408	214.112	634.7	320.399	256.475	323.475	232.784	225.669	187.445	269.454
ENSG00000232618		novel transcript		175.066	68.9397	306.312	3.32645	0.753442	10.0314	3.58841e-06	0.00104482	lncRNA	6	142946406	142957945	1	79.0487	50.6346	93.8685	45.888	52.3527	41.603	47.5145	22.2548	156.685	122.382	43.9112	116.566	32.218	64.7792	71.0422	39.2269	39.2044	129.356	65.8491	85.0867	48.262	249.005	209.488	76.0681	41.0002	153.309	27.6604	57.648	460.33	1172.44	120.081	64.0055	151.761
ENSG00000253320	MAILR	macrophage interferon regulatory lncRNA [Source:HGNC Symbol;Acc:HGNC:51558]		673.39	111.248	1368.58	3.99248	0.89447	15.9168	4.27917e-06	0.00119417	lncRNA	8	102864271	103002424	1	76.1915	75.5624	115.232	186.532	121.475	144.387	74.3372	201.282	66.156	72.6645	110.562	34.6366	122.129	169.848	57.0339	173.06	143.391	31.5652	61.2549	118.12	180.778	2261.7	288.697	198.374	109.334	96.5848	85.2862	190.591	4013.02	4654.26	923.38	244.592	230.739
ENSG00000148826	NKX6-2	NK6 homeobox 2 [Source:HGNC Symbol;Acc:HGNC:19321]	84504	11.7477	0	26.2796	11.2319	3.33402	2405.09	4.285e-06	0.00119417	protein_coding	10	132783179	132786147	-1	0	0	0	0	0	0	0	0	0	0	0	0	0	0	0	0	0	0	0	0	0	18.4851	25.0134	0	12.1482	10.7316	2.30503	14.1179	47.0006	4.25824	4.14072	0	6.19433
ENSG00000169397	RNASE3	ribonuclease A family member 3 [Source:HGNC Symbol;Acc:HGNC:10046]	6037	267.078	175.668	379.933	3.61981	0.81848	12.2934	4.22557e-06	0.00119417	protein_coding	14	20891399	20892348	1	60.0008	433.12	189.032	235.995	141.925	197.41	244.47	216.119	26.1142	126.207	141.143	159.861	62.1883	314.416	100.059	174.598	143.928	184.44	105.665	208.212	224.132	50.0184	6.25336	64.1358	9.11116	3.06618	217.825	48.2361	33.1769	58.1959	12.4222	166.871	15.4858
ENSG00000156575	PRG3	proteoglycan 3, pro eosinophil major basic protein 2 [Source:HGNC Symbol;Acc:HGNC:9363]	10394	20.6979	9.59033	34.4153	4.38253	0.97437	20.858	4.53158e-06	0.00122781	protein_coding	11	57376769	57381150	-1	23.8098	6.23195	3.23685	17.2825	1.63602	11.4204	1.53273	10.8801	0	4.78056	7.05716	0	14.9851	7.8999	12.0071	2.30747	5.90751	4.33248	28.3304	32.0326	5.72601	4.34943	0	0	0	0	1.15252	3.52947	0	5.67765	0	9.14364	4.64575
ENSG00000116044	NFE2L2	nuclear factor, erythroid 2 like 2 [Source:HGNC Symbol;Acc:HGNC:7782]	4780	2343.22	1360.99	3558.69	1.80272	0.431437	3.48877	4.85527e-06	0.00127995	protein_coding	2	177227595	177392697	-1	892.393	1205.88	1711.64	1096.54	1346.04	1196.7	1554.95	1316	1868.04	1633.99	1338.51	1288.88	753.003	798.68	2316.38	1437.55	1097.19	2411.34	1058.18	919.937	1339.07	2751.01	3890.63	2040.41	1491.19	3578.24	1520.17	2301.22	4272.91	5082.92	2443.02	1968.17	2353.85
ENSG00000146859	TMEM140	transmembrane protein 140 [Source:HGNC Symbol;Acc:HGNC:21870]	55281	290.903	148.152	467.495	1.78496	0.428118	3.44608	4.85122e-06	0.00127995	protein_coding	7	135148072	135166215	1	150.478	88.0262	98.4001	93.5638	126.792	162.333	361.723	146.387	115.773	152.978	232.102	164.524	119.132	72.6791	168.1	221.517	185.818	128.118	115.619	144.147	62.9861	372.963	446.073	265.492	697.004	573.376	275.451	430.596	564.007	455.632	532.082	384.033	478.512
ENSG00000106333	PCOLCE	procollagen C-endopeptidase enhancer [Source:HGNC Symbol;Acc:HGNC:8738]	5118	94.4221	89.6173	100.448	-2.40967	0.673131	-5.31354	5.08131e-06	0.00132168	protein_coding	7	100602363	100608175	1	37.1434	99.7111	100.99	74.4934	74.03	141.94	77.4027	73.6882	20.8914	59.2789	79.9811	82.5951	132.618	62.4092	124.074	179.213	155.206	47.6573	52.0667	132.135	74.4381	109.823	65.6603	76.0681	106.297	300.486	118.709	195.297	62.2067	113.553	89.0254	134.869	117.692
ENSG00000186352	ANKRD37	ankyrin repeat domain 37 [Source:HGNC Symbol;Acc:HGNC:29593]	353322	128.616	46.7269	229.948	2.39935	0.571269	5.27564	5.40802e-06	0.00137012	protein_coding	4	185396021	185400628	1	31.429	20.2538	91.9264	57.211	49.4896	36.7086	62.8418	33.1349	80.954	24.8589	54.1049	35.3027	26.9732	49.7694	60.0357	41.5344	29.0005	60.6548	39.05	42.0428	53.988	204.423	141.743	104.407	107.815	531.983	140.607	277.652	388.446	107.875	180.121	89.1505	354.626
ENSG00000129521	EGLN3	egl-9 family hypoxia inducible factor 3 [Source:HGNC Symbol;Acc:HGNC:14661]	112399	101.858	60.056	153.554	2.86385	0.671043	7.27955	5.39413e-06	0.00137012	protein_coding	14	33924227	34462774	-1	62.858	38.9497	97.7528	49.4636	125.974	66.0754	62.8418	103.361	39.1713	20.0783	36.854	35.3027	98.9019	66.3592	73.0434	58.4558	102.039	23.5192	39.05	39.0398	22.086	63.0667	34.3935	259.526	217.149	105.783	110.642	122.355	59.442	73.8095	159.418	34.2887	37.166
ENSG00000223745	CCDC18-AS1	CCDC18 antisense RNA 1 [Source:HGNC Symbol;Acc:HGNC:52262]		1593.76	1938.2	1169.56	-1.79617	0.505611	-3.47296	5.83148e-06	0.00142641	lncRNA	1	93262186	93346025	-1	2579.08	1673.28	1747.25	2321.81	838.87	1598.86	1922.04	1644.88	1232.59	1486.75	1485.92	2835.54	2966.31	1901.51	1670.99	3578.88	1979.55	1606.73	1643.16	2159.2	1829.05	1278.73	738.939	1956.89	2194.27	807.939	1474.07	1814.15	717.451	1127.01	1250.5	1394.41	2237.7
ENSG00000008118	CAMK1G	calcium/calmodulin dependent protein kinase IG [Source:HGNC Symbol;Acc:HGNC:14585]	57172	16.2521	0.231405	36.0613	6.88044	1.48169	117.82	5.94091e-06	0.00142641	protein_coding	1	209583714	209613939	1	0	0	0	2.38379	0	0	0	0	0	0	0	0	0	0	0	0	0	2.4757	0	0	0	60.892	18.7601	4.47459	0	35.2611	8.06761	7.05894	123.031	124.908	6.21108	36.5746	1.54858
ENSG00000102144	PGK1	phosphoglycerate kinase 1 [Source:HGNC Symbol;Acc:HGNC:8896]	5230	7929.79	7407.47	8579.89	1.18045	0.286694	2.26648	5.8267e-06	0.00142641	protein_coding	X	77910739	78129295	1	7138.19	8885.98	8927.87	6163.29	6791.53	8123.2	8275.19	6381.69	7214.48	7043.67	6167.96	7097.85	7015.29	7321.63	9016.36	6120.94	7314.03	9174.34	7414.91	6703.83	7264.66	8569.46	6958.95	4468.63	3548.8	10960.1	7778.33	6421.29	8395.14	7683.28	5190.39	10176.9	3913.27
ENSG00000132109	TRIM21	tripartite motif containing 21 [Source:HGNC Symbol;Acc:HGNC:11312]	6737	568.367	542.451	600.635	1.63357	0.397371	3.1028	6.06889e-06	0.00142641	protein_coding	11	4384897	4393702	-1	417.148	487.65	391.011	448.749	640.502	446.213	1014.66	741.333	447.423	540.203	604.563	527.543	369.384	489.794	539.321	744.542	613.307	566.936	575.796	461.47	323.928	851.4	395.004	272.95	660.559	406.269	349.212	311.77	416.094	437.179	335.398	310.884	277.196
ENSG00000086548	CEACAM6	CEA cell adhesion molecule 6 [Source:HGNC Symbol;Acc:HGNC:1818]	4680	159.645	69.3219	271.153	4.522	1.01078	22.9752	5.89894e-06	0.00142641	protein_coding	19	41750977	41772211	1	15.2383	65.4354	31.0737	125.149	39.6735	181.096	65.9072	17.8039	10.4457	50.6739	39.9906	27.3097	6.74331	60.8293	208.124	111.528	4.83342	68.0819	60.4893	24.0245	241.31	2.17471	2.08445	7.45765	0	9.19855	3.45755	22.3533	40.0888	9.93589	0	45.7182	1.54858
ENSG00000182541	LIMK2	LIM domain kinase 2 [Source:HGNC Symbol;Acc:HGNC:6614]	3985	1596.37	927.071	2424.51	1.71767	0.416781	3.28904	6.02182e-06	0.00142641	protein_coding	22	31212239	31280080	1	610.484	714.337	656.432	800.954	584.06	819.825	1166.4	673.579	919.22	1325.17	678.271	998.468	576.179	670.702	2019.2	794.537	692.79	1999.75	629.394	892.91	1245.82	2379.14	4061.56	1023.19	1424.38	2837.75	1925.85	1536.5	3867.87	3144	1656.29	2194.47	1624.46
ENSG00000091262	ABCC6	ATP binding cassette subfamily C member 6 [Source:HGNC Symbol;Acc:HGNC:57]	368	49.4833	52.6576	45.5812	-3.23029	0.910768	-9.38458	6.59721e-06	0.0015141	protein_coding	16	16149565	16223522	-1	9.52394	63.0985	67.3264	72.1097	69.1219	150.913	60.5427	90.5029	22.6323	14.3417	100.368	57.2837	32.218	41.8695	28.0167	29.2279	65.5197	21.0435	15.3137	31.0316	63.8041	30.446	42.7313	105.899	37.9632	15.3309	38.033	82.3544	51.1477	41.163	70.3922	128.011	21.6802
ENSG00000276070	CCL4L2	C-C motif chemokine ligand 4 like 2 [Source:HGNC Symbol;Acc:HGNC:24066]	9560	650.45	27.922	1420.11	5.89645	1.28758	59.5675	7.57446e-06	0.00171817	protein_coding	17	36210924	36212878	1	0	11.6849	56.3211	14.3027	16.7692	24.4724	0	8.90193	20.8914	65.9717	44.6953	0	37.4628	5.52993	104.062	14.614	30.0746	55.0844	32.1588	9.00918	34.356	1972.47	91.716	481.764	88.0746	352.611	36.8805	991.782	2168.94	9145.28	1766.02	73.1491	66.5891
ENSG00000170542	SERPINB9	serpin family B member 9 [Source:HGNC Symbol;Acc:HGNC:8955]	5272	3531.8	1235.18	6372.26	2.72125	0.65318	6.59445	7.96688e-06	0.00178641	protein_coding	6	2887270	2903309	-1	847.63	689.409	783.317	600.119	923.125	838.587	2843.21	1257.64	1192.55	1482.93	1994.82	1299.54	743.263	638.312	1147.68	2801.26	1432.84	1632.73	1491.56	693.707	604.503	4195.02	7281	1809.23	1952.83	6265.75	1386.48	2412.98	16653.4	8661.26	5654.15	2900.82	1796.36
ENSG00000119917	IFIT3	interferon induced protein with tetratricopeptide repeats 3 [Source:HGNC Symbol;Acc:HGNC:5411]	3437	2241.71	512.9	4378.27	4.94779	1.11083	30.8626	8.06258e-06	0.00178733	protein_coding	10	89327997	89340971	1	224.765	358.337	181.911	191.299	222.499	2333.85	3101.47	407.51	183.67	253.37	221.908	1173.65	286.965	253.587	160.095	123.065	259.93	111.407	226.643	215.219	279.756	10880.1	460.664	390.781	1116.12	821.737	142.912	354.124	2174.47	2079.44	716.344	219.447	367.014
ENSG00000183569	SERHL2	serine hydrolase like 2 [Source:HGNC Symbol;Acc:HGNC:29446]	253190	83.8097	59.8261	113.524	-3.34768	0.985338	-10.1801	8.55095e-06	0.00187429	protein_coding	22	42553617	42574382	1	39.0481	47.5186	43.3737	26.8176	134.563	76.6801	52.1127	69.7318	88.7883	1.91222	45.4795	37.301	32.9673	283.607	11.0065	20.7672	40.2785	20.4246	19.1422	38.0387	126.79	118.522	139.658	234.17	135.149	78.1877	106.031	129.414	114.737	122.07	105.588	68.5773	221.447
ENSG00000197930	ERO1A	endoplasmic reticulum oxidoreductase 1 alpha [Source:HGNC Symbol;Acc:HGNC:13280]	30001	1764.45	1576.07	1998.22	1.34994	0.336655	2.54902	8.7454e-06	0.00187478	protein_coding	14	52639915	52695900	-1	861.916	1513.58	1420.33	1557.81	1276.1	1698.38	2403.31	1009.87	1364.03	2172.29	1761.94	1404.12	1138.87	996.178	2217.32	1885.2	1436.6	2012.13	1421.88	2074.11	1471.58	1393.99	1613.37	1017.22	1190.53	2479.01	1411.83	1589.44	1737.64	1315.8	1556.91	2272.19	1104.14
ENSG00000095752	IL11	interleukin 11 [Source:HGNC Symbol;Acc:HGNC:5966]	3589	41.5619	7.8093	83.2884	4.88095	1.10519	29.4653	8.74001e-06	0.00187478	protein_coding	19	55364382	55370463	-1	1.90479	2.33698	3.88422	1.78784	2.86304	0	3.06545	4.45096	60.0627	19.1222	1.56826	10.6574	8.24183	3.15996	2.00119	1.53831	0.537046	4.33248	9.18824	20.0204	3.272	47.8437	39.6046	5.96612	1.51853	30.6618	11.5252	14.1179	114.737	90.8424	6.21108	2.28591	12.3887
ENSG00000135245	HILPDA	hypoxia inducible lipid droplet associated [Source:HGNC Symbol;Acc:HGNC:28859]	29923	287.577	98.9676	520.829	4.08142	0.947869	16.9289	9.42081e-06	0.00199762	protein_coding	7	128455849	128458418	1	133.335	126.197	70.5633	112.038	110.431	83.2061	99.6272	147.376	77.4721	56.4106	73.7081	70.6055	95.1556	150.098	65.0387	93.0678	113.317	41.4681	85.7569	189.193	84.2541	525.193	22.929	59.6612	36.4447	1694.07	57.6258	2.35298	752.01	171.749	45.5479	54.8618	63.4919
ENSG00000115267	IFIH1	interferon induced with helicase C domain 1 [Source:HGNC Symbol;Acc:HGNC:18873]	64135	1211.28	785.966	1737.47	2.30982	0.567693	4.95821	9.70969e-06	0.00201527	protein_coding	2	162267074	162318684	-1	620.008	614.626	555.443	482.122	679.358	1366.37	2235.48	835.792	524.895	933.165	709.636	1031.11	782.973	520.604	664.395	701.47	663.789	595.407	637.817	909.927	440.902	2248.65	866.091	715.935	1433.49	1163.62	520.937	777.66	3046.75	1159.66	927.521	651.484	1034.45
ENSG00000155657	TTN	titin [Source:HGNC Symbol;Acc:HGNC:12403]	7273	1947.57	1924.85	1977.61	-2.31392	0.713325	-4.97231	9.98162e-06	0.00201527	protein_coding	2	178525989	178830802	-1	3402.9	1159.92	1644.97	1563.77	1813.53	1082.49	1524.3	1469.31	541.434	545.94	1939.15	3139.94	4849.94	2225.4	1963.17	1471.39	1930.14	995.233	3241.15	3290.35	627.407	3221.84	1451.82	2267.13	3876.8	955.116	1471.76	3195.35	1549.64	1420.83	3496.84	1552.13	5531.54
ENSG00000134072	CAMK1	calcium/calmodulin dependent protein kinase I [Source:HGNC Symbol;Acc:HGNC:1459]	8536	111.158	150.815	62.1999	-2.82692	0.881247	-7.09559	1.00205e-05	0.00201527	protein_coding	3	9757347	9769992	-1	43.8101	142.556	166.374	78.6651	133.745	302.642	297.349	273.982	16.539	81.2695	239.159	132.552	149.851	95.5888	138.082	149.216	341.024	97.7903	41.3471	144.147	101.432	82.6391	27.0979	13.4238	71.3708	64.3899	110.642	151.767	24.8827	29.8077	151.136	107.438	54.2004
ENSG00000254860	TMEM9B-AS1	TMEM9B antisense RNA 1 [Source:HGNC Symbol;Acc:HGNC:19230]	493900	152.827	143.301	164.696	-2.12454	0.627377	-4.36065	9.89495e-06	0.00201527	lncRNA	11	8964510	8977527	1	228.575	158.915	132.063	123.361	164.42	114.204	117.254	102.867	47.876	85.0939	290.912	105.908	83.9168	161.948	56.0333	164.599	250.264	55.0844	284.835	124.126	157.056	139.182	88.5893	226.713	356.854	95.0517	131.387	420.007	134.09	164.652	192.543	139.441	263.259
ENSG00000130304	SLC27A1	solute carrier family 27 member 1 [Source:HGNC Symbol;Acc:HGNC:10995]	376497	316.313	263.293	382.025	-1.73757	0.50206	-3.33472	9.74233e-06	0.00201527	protein_coding	19	17468769	17506168	1	130.478	301.47	271.895	224.672	290.803	318.957	289.685	439.656	73.9902	171.144	528.503	246.453	177.574	299.406	232.138	349.197	420.507	242	186.062	143.146	191.412	290.324	412.722	317.696	335.595	466.06	584.326	588.245	203.209	349.176	494.816	761.208	323.654
ENSG00000155393	HEATR3	HEAT repeat containing 3 [Source:HGNC Symbol;Acc:HGNC:26087]	55027	697.244	827.028	537.415	-1.57245	0.454614	-2.97409	1.05369e-05	0.00209749	protein_coding	16	50065970	50107272	1	664.771	640.333	943.217	838.498	704.716	796.984	951.823	1063.78	479.631	917.867	563.789	799.307	1093.17	880.839	589.35	1149.89	952.72	771.182	833.067	850.867	881.805	540.416	375.202	528.002	630.189	1215.74	699.577	507.067	243.297	377.564	331.257	1497.27	515.678
ENSG00000105855	ITGB8	integrin subunit beta 8 [Source:HGNC Symbol;Acc:HGNC:6163]	3696	654.494	33.7466	1421.89	6.16023	1.35655	71.518	1.08598e-05	0.00213993	protein_coding	7	20330702	20415754	1	26.667	25.7068	15.5369	17.2825	5.72607	12.2362	16.0936	17.8039	170.613	157.758	28.2286	38.6332	7.49257	11.0599	25.0149	0	3.75932	48.8952	29.8618	38.0387	12.27	324.032	490.889	17.8984	4.55558	429.266	29.9654	42.3537	3267.93	1700.46	72.4625	22.8591	1.54858
ENSG00000223705	NSUN5P1	NSUN5 pseudogene 1 [Source:HGNC Symbol;Acc:HGNC:19146]	155400	287.133	296.883	275.288	-2.29255	0.699431	-4.8992	1.10831e-05	0.00216208	transcribed_unprocessed_pseudogene	7	75410322	75416787	1	208.574	211.107	236.29	438.021	405.733	244.724	386.247	311.567	199.338	56.4106	650.043	271.764	158.093	323.896	122.073	780.693	426.952	120.072	162.326	145.148	375.462	166.366	254.303	378.849	624.115	202.368	381.483	292.946	171.414	221.428	370.594	283.453	706.154
ENSG00000078401	EDN1	endothelin 1 [Source:HGNC Symbol;Acc:HGNC:3176]	1906	54.9409	27.1391	89.3299	2.7363	0.673053	6.66361	1.16428e-05	0.00220254	protein_coding	6	12290361	12297194	1	15.2383	8.56893	20.0684	19.6663	33.1294	16.3149	7.66363	13.8474	29.5961	55.4545	31.3651	42.6297	32.218	15.7998	10.0059	35.3811	26.8523	39.6113	52.8324	44.0449	19.632	55.4552	140.701	31.3221	25.815	47.5258	42.6431	41.1772	261.268	106.456	49.6886	0	37.166
ENSG00000181577	C6orf223	chromosome 6 open reading frame 223 [Source:HGNC Symbol;Acc:HGNC:28692]	221416	78.129	7.24344	165.758	5.57878	1.25494	47.7947	1.1855e-05	0.00220254	lncRNA	6	44000580	44007612	1	0	2.33698	9.06317	1.1919	2.86304	32.6298	0.766363	6.92372	2.61142	26.7711	0	2.66436	23.227	0	18.0107	0	2.14819	2.4757	17.6108	0	0.818001	88.0759	68.787	28.3391	7.59264	196.236	24.2028	44.7066	172.796	298.077	68.3218	32.0027	1.54858
ENSG00000269952		novel transcript, sense intronic to CREM		42.2699	6.84688	86.0951	3.37007	0.815395	10.3393	1.15797e-05	0.00220254	lncRNA	10	35210416	35210750	1	7.61915	2.33698	14.8895	14.8987	5.31707	10.6047	9.19636	0	10.4457	7.64889	3.92064	3.99654	2.24777	2.36997	5.00297	2.30747	6.9816	21.0435	9.95393	3.00306	0	56.5425	53.1536	38.7798	44.0373	180.905	11.5252	124.708	116.119	56.7765	132.503	13.7155	215.253
ENSG00000100678	SLC8A3	solute carrier family 8 member A3 [Source:HGNC Symbol;Acc:HGNC:11070]	6547	60.9603	35.385	92.5865	2.87083	0.70219	7.31484	1.16025e-05	0.00220254	protein_coding	14	70044215	70189070	-1	18.0955	42.8446	35.6053	45.888	66.2589	88.1005	29.1218	59.3462	23.5028	15.2978	15.6826	41.2975	48.7017	46.6094	27.0161	3.07662	63.3715	16.711	19.9079	17.0173	19.632	119.609	28.1401	49.2205	37.9632	42.9266	53.0157	42.3537	62.2067	106.456	39.3368	59.4337	15.4858
ENSG00000261888		novel transcript		107.552	27.0303	207.139	2.75336	0.677477	6.74287	1.18185e-05	0.00220254	lncRNA	17	83104255	83106910	1	11.4287	28.8228	53.7316	14.8987	16.3602	19.5779	49.0472	29.6731	42.6532	37.2883	36.0699	4.66262	3.74628	12.6398	53.0315	23.8438	22.5559	36.5166	13.7824	36.0367	21.268	131.57	280.359	98.441	71.3708	217.699	39.1855	202.356	208.738	200.137	169.769	73.1491	85.1721
ENSG00000196569	LAMA2	laminin subunit alpha 2 [Source:HGNC Symbol;Acc:HGNC:6482]	3908	17.8083	6.0341	32.3734	2.82026	0.703156	7.06289	1.2742e-05	0.00232309	protein_coding	6	128883138	129516566	1	3.80958	5.45295	17.479	5.95948	3.27204	4.89447	8.42999	1.97821	7.83426	4.78056	3.92064	0	4.49554	8.68989	4.00238	11.5373	4.29637	2.4757	15.3137	4.00408	4.09	41.3196	5.21113	11.9322	13.6667	58.2575	26.5079	24.7063	71.8833	48.26	28.985	9.14364	26.3259
ENSG00000110944	IL23A	interleukin 23 subunit alpha [Source:HGNC Symbol;Acc:HGNC:15488]	51561	93.4503	34.9043	165.864	2.79677	0.689274	6.94883	1.26481e-05	0.00232309	protein_coding	12	56334174	56340410	1	33.3338	14.8009	22.6579	16.6865	44.5816	17.1307	43.6827	35.6077	38.3008	32.5078	34.5017	85.2594	41.9584	26.8597	29.0173	88.4529	16.1114	49.5141	47.4726	8.00816	6.54401	196.812	103.18	41.7629	44.0373	84.3201	84.1337	74.1189	208.738	498.214	192.543	32.0027	106.852
ENSG00000273604	EPOP	elongin BC and polycomb repressive complex 2 associated protein [Source:HGNC Symbol;Acc:HGNC:34493]	100170841	74.8317	37.9802	120.425	2.05986	0.522252	4.16946	1.32616e-05	0.00239544	protein_coding	17	38671703	38674957	-1	34.2862	56.0875	31.7211	47.0799	47.0356	33.4456	52.879	28.1894	54.8398	19.1222	41.5588	38.6332	46.4539	46.6094	30.0178	41.5344	26.8523	32.1842	26.0333	27.0275	35.992	134.832	75.0403	88.0003	47.0744	177.839	49.5582	47.0596	192.15	140.522	60.0404	77.7209	37.166
ENSG00000031081	ARHGAP31	Rho GTPase activating protein 31 [Source:HGNC Symbol;Acc:HGNC:29216]	57514	689.509	274.829	1202.24	2.78878	0.688872	6.91044	1.36625e-05	0.00242298	protein_coding	3	119294383	119420714	1	61.9056	239.93	366.411	219.309	266.671	349.955	655.24	527.192	226.323	108.041	384.223	205.155	202.299	327.846	136.081	404.576	431.248	170.824	209.032	95.0969	184.05	455.602	706.63	535.46	560.337	634.7	440.261	957.663	912.365	1040.43	768.103	1069.81	255.516
ENSG00000102755	FLT1	fms related receptor tyrosine kinase 1 [Source:HGNC Symbol;Acc:HGNC:3763]	2321	190.064	113.081	285.305	2.74166	0.678433	6.68841	1.35396e-05	0.00242298	protein_coding	13	28300346	28495145	-1	105.716	47.5186	66.679	81.6448	217.591	58.7337	91.1972	206.723	165.39	30.5956	76.0605	85.2594	118.383	240.157	83.0494	176.906	156.28	40.2302	176.874	85.0867	64.6221	259.878	225.121	35.7967	173.112	384.806	97.9638	83.5308	233.621	552.152	171.84	45.7182	137.824
ENSG00000245213		novel transcript, antisense to GALNT7	101930370	115.311	150.343	72.0928	-2.05552	0.625218	-4.15695	1.44459e-05	0.00251616	lncRNA	4	173094868	173169652	-1	143.811	144.114	166.374	157.926	206.957	157.439	219.946	203.261	89.6588	46.8495	214.851	88.5899	147.604	247.267	79.047	207.672	179.911	40.8491	50.5353	128.131	236.402	96.7747	34.3935	116.339	97.1858	30.6618	101.421	58.8245	59.442	48.26	66.2515	153.156	142.47
ENSG00000187122	SLIT1	slit guidance ligand 1 [Source:HGNC Symbol;Acc:HGNC:11085]	6585	46.1305	40.5914	53.0171	-2.33259	0.666633	-5.03707	1.44094e-05	0.00251616	protein_coding	10	96998038	97185959	-1	16.1907	32.7177	33.6632	48.2718	45.3996	24.4724	51.3463	39.5641	42.6532	27.7272	53.3208	27.3097	39.7106	22.9097	66.0393	59.225	97.7424	43.3248	21.4392	34.0347	25.358	35.8828	32.309	71.5935	37.9632	173.239	43.7956	70.5894	34.5593	38.3242	47.6182	70.8632	63.4919
ENSG00000124466	LYPD3	LY6/PLAUR domain containing 3 [Source:HGNC Symbol;Acc:HGNC:24880]	27076	343.993	52.2539	704.779	4.31071	1.01845	19.8451	1.47828e-05	0.00255205	protein_coding	19	43460787	43465608	-1	45.7149	25.7068	46.6106	2.38379	10.2251	31.8141	6.89727	3.46186	60.0627	142.461	14.8984	38.6332	215.786	7.8999	59.0351	28.4587	2.68523	33.422	106.43	199.203	15.542	673.074	357.484	74.5765	27.3335	1172.82	67.9984	204.709	774.128	1574.13	643.881	249.164	247.773
ENSG00000251230	MIR3945HG	MIR3945 host gene [Source:HGNC Symbol;Acc:HGNC:52002]		135.156	12.9933	286.169	5.5511	1.27426	46.8865	1.78682e-05	0.00303106	lncRNA	4	184844554	184855751	-1	0.952394	10.9059	16.1842	1.78784	0	4.89447	2.29909	11.8692	34.8189	36.3322	0.784129	1.99827	8.24183	5.52993	38.0226	7.69155	4.83342	21.0435	1.53137	50.051	13.088	206.598	45.858	17.8984	0	26.0626	8.06761	30.5888	588.89	1280.31	97.3068	34.2887	6.19433
ENSG00000135114	OASL	2'-5'-oligoadenylate synthetase like [Source:HGNC Symbol;Acc:HGNC:8090]	8638	1261.98	237.783	2528.31	4.34837	1.03851	20.3699	1.87172e-05	0.00314771	protein_coding	12	121019111	121039242	-1	65.7152	194.748	183.853	68.534	33.9474	672.99	711.185	65.2808	180.188	723.776	159.178	492.906	212.04	15.0098	234.139	42.3035	53.7046	221.576	224.346	391.399	46.626	5446.57	1647.76	428.069	359.891	2721.24	182.097	368.242	4941.98	3122.71	664.585	365.746	263.259
ENSG00000109576	AADAT	aminoadipate aminotransferase [Source:HGNC Symbol;Acc:HGNC:17929]	51166	45.3926	67.9826	17.511	-2.42996	0.758684	-5.38877	2.07937e-05	0.00340877	protein_coding	4	170060222	170091699	-1	94.287	59.9825	56.9685	95.9476	101.024	99.521	45.2154	55.3898	80.954	42.0689	45.4795	27.9757	121.38	131.928	43.0256	10.7682	96.6683	27.8517	32.1588	60.0612	98.9781	13.0483	4.16891	8.94918	21.2594	36.7942	39.1855	10.5884	19.3532	15.6135	16.5629	41.1464	6.19433
ENSG00000145901	TNIP1	TNFAIP3 interacting protein 1 [Source:HGNC Symbol;Acc:HGNC:16903]	10318	4968.72	2955.2	7460.23	1.87767	0.489656	3.67482	2.11735e-05	0.00344211	protein_coding	5	151029945	151093577	-1	2338.13	2463.18	2511.15	2080.45	2314.56	2303.67	3073.12	2609.25	2858.63	4607.5	2788.36	3838.01	3269.76	2266.48	4604.74	2568.98	2361.39	4070.06	2913.44	4276.36	1941.93	6737.26	6878.7	2371.53	3210.17	7449.29	2981.56	3444.76	14291	11231.8	4227.67	5157.01	2984.12
ENSG00000205755	CRLF2	cytokine receptor like factor 2 [Source:HGNC Symbol;Acc:HGNC:14281]	64109	351.275	47.3786	727.05	4.85894	1.1521	29.0192	2.21141e-05	0.00356531	protein_coding	X	1187549	1212723	-1	52.3817	30.3807	29.779	8.93921	13.9062	37.5243	17.6263	13.8474	355.153	165.407	8.62542	8.65916	12.7374	22.9097	30.0178	22.3055	14.5003	37.1356	22.9706	59.0602	31.084	246.83	453.369	76.0681	27.3335	300.486	20.7453	102.355	1911.82	1669.23	105.588	75.435	15.4858
ENSG00000171631	P2RY6	pyrimidinergic receptor P2Y6 [Source:HGNC Symbol;Acc:HGNC:8543]	5031	87.9571	19.5471	172.549	3.15725	0.802534	8.92128	2.60333e-05	0.00412892	protein_coding	11	73264505	73298625	1	3.80958	15.5799	18.7737	16.0906	28.6304	48.9447	38.3181	22.7494	0	3.82445	13.3302	30.6401	16.4837	14.2198	4.00238	7.69155	34.908	16.711	26.0333	26.0265	23.722	90.2506	405.426	137.221	154.89	125.714	49.5582	88.2368	152.061	217.17	74.5329	41.1464	27.8745
ENSG00000116514	RNF19B	ring finger protein 19B [Source:HGNC Symbol;Acc:HGNC:26886]	127544	1965.76	1003.46	3156.32	2.38957	0.623188	5.24002	2.67663e-05	0.00418199	protein_coding	1	32936445	32964809	-1	871.44	1033.72	1628.13	451.132	452.36	852.454	809.279	544.007	940.111	1508.74	650.043	948.511	2107.66	479.524	1196.71	486.875	645.53	774.277	1699.06	2340.38	652.765	4233.08	2348.14	929.224	683.337	1599.01	886.285	1370.61	4856.27	4889.88	2492.71	3019.69	531.164
ENSG00000119523	ALG2	ALG2 alpha-1,3/1,6-mannosyltransferase [Source:HGNC Symbol;Acc:HGNC:23159]	85365	735.103	488.69	1040.19	1.41973	0.380173	2.67536	2.70054e-05	0.00418199	protein_coding	9	99216425	99221942	-1	460.959	467.396	775.548	373.063	391.418	339.35	572.473	487.133	643.28	561.237	380.302	464.264	578.426	276.497	642.382	452.263	363.043	698.768	550.529	481.49	302.66	902.506	952.595	938.173	616.522	1057.83	624.664	729.424	1823.35	1141.21	668.726	555.476	732.48
ENSG00000167483	NIBAN3	niban apoptosis regulator 3 [Source:HGNC Symbol;Acc:HGNC:24130]	199786	7308.59	8714.09	5578.33	-2.97232	1.14014	-7.84796	2.7011e-05	0.00418199	protein_coding	19	17523301	17553839	1	14045.9	6320.75	9400.45	11260.4	13866.1	5125.33	5356.88	11343.5	2868.21	1070.84	7402.96	6893.36	20606.1	19616.2	5441.23	5754.05	12721.6	2644.05	5235.77	8759.92	7262.21	2761.89	1008.88	5271.07	17467.6	2163.19	9508.26	7796.6	1432.14	1165.34	10589.9	2345.34	23657.7
ENSG00000064989	CALCRL	calcitonin receptor like receptor [Source:HGNC Symbol;Acc:HGNC:16709]	10203	290.85	180.129	427.85	2.96478	0.759056	7.80704	2.72367e-05	0.00418372	protein_coding	2	187341964	187448460	-1	155.24	215.002	173.495	36.3528	122.702	82.3903	118.786	168.147	720.752	437.899	77.6287	120.562	168.583	87.6889	235.14	170.752	135.873	129.974	130.932	185.189	109.612	133.745	264.726	126.78	48.5929	157.908	157.895	50.5891	222.562	556.41	93.1661	155.442	46.4575
ENSG00000049249	TNFRSF9	TNF receptor superfamily member 9 [Source:HGNC Symbol;Acc:HGNC:11924]	3604	212.024	47.418	415.57	3.41235	0.86161	10.6468	2.79955e-05	0.00426669	protein_coding	1	7915871	7943165	-1	31.429	31.1597	35.6053	112.038	47.4446	44.0503	29.8882	43.026	79.2131	69.7961	90.1748	34.6366	29.9703	15.7998	22.0131	36.1503	32.7598	86.6497	44.4098	28.0286	51.534	83.7265	281.401	102.916	51.6299	213.1	42.6431	208.239	2488.27	361.95	138.714	105.152	35.6174
ENSG00000204020	LIPN	lipase family member N [Source:HGNC Symbol;Acc:HGNC:23452]	643418	306.238	115.75	541.754	3.36846	0.851524	10.3278	2.82786e-05	0.00427642	protein_coding	10	88759982	88779626	1	14.2859	108.28	176.732	146.007	184.052	90.5478	263.629	207.712	161.908	56.4106	210.931	70.6055	23.9762	66.3592	140.083	148.447	121.91	39.6113	29.0961	27.0275	143.15	153.317	214.699	58.1697	126.038	550.38	71.456	271.769	1716.9	770.741	950.294	146.298	30.9717
ENSG00000198796	ALPK2	alpha kinase 2 [Source:HGNC Symbol;Acc:HGNC:20565]	115701	34.2187	3.05245	72.7602	4.72111	1.14868	26.3752	2.88977e-05	0.00433643	protein_coding	18	58481247	58629091	-1	1.90479	3.89497	4.53158	3.57569	2.45403	2.44724	0	0	5.22284	4.78056	0.784129	5.32871	9.74034	1.57998	6.00357	2.30747	0	4.95141	4.59412	0	0	41.3196	62.5336	0	0	39.8604	8.06761	8.23544	160.355	72.3901	22.7739	9.14364	4.64575
ENSG00000228784	LINC00954	long intergenic non-protein coding RNA 954 [Source:HGNC Symbol;Acc:HGNC:48668]	400946	232.744	254.084	206.552	-2.03469	0.678979	-4.09735	3.11163e-05	0.00463372	lncRNA	2	19868860	19885047	1	172.383	151.904	138.537	464.243	400.825	203.121	258.264	244.308	117.514	99.4356	388.928	267.768	277.225	333.376	108.064	513.796	377.007	250.665	179.171	111.113	278.12	57.6299	154.25	201.357	464.669	162.508	228.198	371.771	95.3836	178.846	269.147	130.297	546.65
ENSG00000285744		novel transcript		16.6792	6.51569	29.2446	3.53631	0.900753	11.602	3.18488e-05	0.00470687	lncRNA	8	78805293	78956082	1	2.85718	3.89497	6.47369	16.6865	12.2702	8.15746	1.53273	5.44007	5.22284	9.56112	19.6032	3.33045	2.24777	1.57998	10.0059	7.69155	10.2039	6.18926	3.06275	0	0.818001	3.26207	2.08445	20.8814	37.9632	12.2647	2.30503	8.23544	64.9714	34.0659	14.4925	4.57182	38.7146
ENSG00000013619	MAMLD1	mastermind like domain containing 1 [Source:HGNC Symbol;Acc:HGNC:2568]	10046	252.699	62.6937	487.626	3.59035	0.909819	12.0449	3.28759e-05	0.00481659	protein_coding	X	150361422	150514178	1	71.4295	66.9934	83.5106	81.6448	62.9868	56.2865	25.29	68.7427	184.54	134.812	42.343	51.2889	24.7255	31.5996	28.0167	38.4578	46.723	42.7059	92.6481	18.0184	63.8041	214.209	367.906	114.848	101.741	298.953	66.8459	58.8245	904.071	509.569	86.9551	9.14364	40.2632
ENSG00000125730	C3	complement C3 [Source:HGNC Symbol;Acc:HGNC:1318]	718	191.269	26.0271	395.621	3.2462	0.834002	9.48864	3.30851e-05	0.00481659	protein_coding	19	6677704	6730562	-1	17.1431	35.8337	31.7211	19.6663	27.8124	31.8141	16.86	20.2766	2.61142	30.5956	34.5017	30.6401	33.7166	12.6398	27.0161	11.5373	58.5381	54.4655	17.6108	25.0255	6.54401	119.609	541.958	40.2713	66.8152	732.818	70.3035	1314.14	940.012	333.562	498.956	169.157	30.9717
ENSG00000184588	PDE4B	phosphodiesterase 4B [Source:HGNC Symbol;Acc:HGNC:8781]	5142	4375.35	2021.3	7288.02	2.09422	0.559671	4.26997	3.36648e-05	0.00486469	protein_coding	1	65792514	66374579	1	1916.22	1046.97	3458.25	1443.98	1138.67	1512.39	2678.44	560.327	1901.98	3126.48	1341.64	2042.23	2993.28	498.484	2123.26	2393.61	1136.39	3089.68	4544.35	2329.37	1171.38	10697.4	4535.77	2237.3	4751.47	8741.69	2480.21	6135.4	10793.6	9353.93	6782.49	5769.64	6578.38
ENSG00000276085	CCL3L3	C-C motif chemokine ligand 3 like 3 [Source:HGNC Symbol;Acc:HGNC:30554]	414062	1442.03	87.463	3116.81	5.63849	1.33587	49.8143	3.45152e-05	0.0049509	protein_coding	17	36194869	36196758	-1	0	116.07	186.442	16.0906	34.7654	113.389	2.29909	7.41827	25.2437	332.727	122.324	1.99827	90.6601	10.2699	256.152	11.5373	37.5932	66.844	102.602	293.299	8.99801	4318.98	186.559	226.713	77.4449	1427.31	72.6085	607.069	9783.04	14285	2714.24	363.46	139.373
ENSG00000124882	EREG	epiregulin [Source:HGNC Symbol;Acc:HGNC:3443]	2069	5711.31	1367.75	11082.5	3.53633	0.900012	11.6023	3.47784e-05	0.00495225	protein_coding	4	74365145	74388749	1	1540.02	1367.13	2660.04	1376.04	469.947	1366.37	676.698	391.19	1396.24	5836.1	403.826	648.771	845.162	228.307	2095.25	370.733	281.412	648.635	1382.83	3925	813.093	8208.46	5524.84	2059.8	624.115	3687.09	1618.13	3702.42	22915.6	19067	11856.9	12974.8	289.585
ENSG00000130475	FCHO1	FCH and mu domain containing endocytic adaptor 1 [Source:HGNC Symbol;Acc:HGNC:29002]	23149	1093.6	1145.79	1029.97	-1.4562	0.467509	-2.74386	3.55892e-05	0.0049845	protein_coding	19	17747718	17788568	1	1093.35	1026.71	1127.07	1455.3	1348.9	1182.83	984.776	1361.99	666.783	443.636	1780.76	773.996	1415.35	1910.2	787.468	1522.93	1453.25	803.985	545.169	1302.33	1074.85	753.538	1313.21	1096.28	1517.01	737.417	1090.28	1528.26	722.98	642.994	1325.03	1069.81	2440.57
ENSG00000124225	PMEPA1	prostate transmembrane protein, androgen induced 1 [Source:HGNC Symbol;Acc:HGNC:14107]	56937	877.715	198.195	1718.1	3.00167	0.782391	8.00928	3.71049e-05	0.00513363	protein_coding	20	57648392	57711536	-1	62.858	113.733	146.953	187.128	316.161	76.6801	172.432	221.065	268.976	98.4795	220.34	199.827	109.392	331.796	130.077	369.195	470.453	281.611	228.175	52.053	104.704	1599.5	3426.84	481.764	716.745	2756.5	314.637	403.536	3678.49	1767.17	436.846	153.156	986.448
ENSG00000172725	CORO1B	coronin 1B [Source:HGNC Symbol;Acc:HGNC:2253]	57175	866.573	645.657	1140.24	-1.06442	0.320602	-2.09132	3.9156e-05	0.00534165	protein_coding	11	67435510	67443821	-1	622.866	694.083	589.106	564.362	696.127	923.424	985.543	834.308	648.503	393.918	694.738	530.207	690.815	710.991	579.344	568.406	822.218	423.964	403.517	641.654	540.698	917.729	1080.79	950.105	1650.64	1323.06	1430.27	1669.44	709.156	1019.14	1397.49	1719	1412.31
ENSG00000167695	TLCD3A	TLC domain containing 3A [Source:HGNC Symbol;Acc:HGNC:29646]	79850	63.5546	29.8529	105.25	1.96357	0.536273	3.90026	3.90473e-05	0.00534165	protein_coding	17	732412	742968	1	14.2859	30.3807	34.3106	41.7163	20.8593	34.2613	26.8227	17.3093	32.2075	45.8934	7.05716	23.9792	48.7017	18.1698	52.0309	28.4587	13.9632	48.8952	40.5814	29.0296	17.996	59.8046	146.954	113.356	62.2596	128.78	32.2704	114.12	265.415	73.8095	97.3068	77.7209	48.0061
ENSG00000056558	TRAF1	TNF receptor associated factor 1 [Source:HGNC Symbol;Acc:HGNC:12031]	7185	1652.04	592.45	2962.47	2.72111	0.720008	6.59378	4.0136e-05	0.00540838	protein_coding	9	120902393	120929173	-1	315.242	372.359	451.864	544.696	547.249	468.238	811.578	338.768	309.018	327.946	1666.27	1111.7	347.655	268.597	440.262	1449.86	497.842	634.399	872.883	277.282	387.732	1437.49	1858.29	1047.05	848.857	2089.6	759.508	1100.02	8686.82	8377.38	2031.02	740.635	1316.3
ENSG00000110330	BIRC2	baculoviral IAP repeat containing 2 [Source:HGNC Symbol;Acc:HGNC:590]	329	2624.36	1905.02	3515.14	1.59684	0.438212	3.0248	4.04769e-05	0.00540838	protein_coding	11	102347211	102378670	1	1770.5	1529.16	1831.41	1249.11	1642.97	1461	2058.45	1754.17	2077.82	2169.42	1558.85	2167.45	2511.51	1377.74	2360.4	1789.82	1545.08	2473.23	3499.95	1844.88	1332.52	4033.01	4398.2	1584.01	1330.23	4640.67	1302.34	1958.86	6681	3511.63	2345.72	1993.31	2225.31
ENSG00000211973	IGHV1-69	immunoglobulin heavy variable 1-69 [Source:HGNC Symbol;Acc:HGNC:5558]		52.6746	51.205	54.5291	-3.14069	1.08879	-8.81945	4.20433e-05	0.00557946	IG_V_gene	14	106714684	106715181	-1	83.8107	21.0328	1.29474	29.2014	47.0356	22.0251	125.684	71.2154	36.5599	56.4106	47.8319	87.2577	25.4747	150.098	41.0244	66.1474	39.2044	38.9923	35.9873	22.0224	26.994	18.4851	3.12668	82.0342	98.7043	78.1877	103.726	62.354	24.8827	45.4212	33.1257	48.0041	82.0749
ENSG00000080947	CROCCP3	CROCC pseudogene 3 [Source:HGNC Symbol;Acc:HGNC:29405]	114819	175.245	134.637	225.566	-2.05822	0.7099	-4.16473	4.27906e-05	0.00564026	transcribed_unprocessed_pseudogene	1	16467436	16499257	-1	106.668	91.1422	99.6949	146.603	201.231	85.6533	219.946	179.028	18.2799	50.6739	317.572	115.233	116.135	190.388	43.0256	285.357	183.133	55.0844	84.9912	109.111	128.426	210.947	270.979	208.814	349.261	139.511	207.453	263.534	138.237	282.463	329.187	297.168	611.69
ENSG00000009694	TENM1	teneurin transmembrane protein 1 [Source:HGNC Symbol;Acc:HGNC:8117]	10178	416.736	294.468	568.301	-2.43412	0.899048	-5.40434	4.38673e-05	0.00574338	protein_coding	X	124375903	124963817	-1	229.527	105.943	131.416	332.539	240.495	190.069	354.06	65.2808	23.5028	165.407	340.312	584.826	268.983	39.4995	291.173	1035.28	248.652	152.256	428.019	355.362	601.231	417.545	842.119	519.053	464.669	814.072	546.292	784.719	453.418	537.958	898.536	420.607	1605.88
ENSG00000064042	LIMCH1	LIM and calponin homology domains 1 [Source:HGNC Symbol;Acc:HGNC:29191]	22998	39.7426	48.6147	28.8156	-2.94353	1.01038	-7.69289	4.46687e-05	0.00580931	protein_coding	4	41359607	41700044	1	33.3338	48.2976	45.9632	13.1108	63.8048	58.7337	22.9909	76.1609	32.2075	45.8934	24.308	35.9688	104.896	134.298	40.0238	56.1483	73.0383	11.7596	16.8451	43.0438	40.082	61.9793	2.08445	19.3899	21.2594	84.3201	25.3553	52.9421	48.383	34.0659	28.985	45.7182	6.19433
ENSG00000163297	ANTXR2	ANTXR cell adhesion molecule 2 [Source:HGNC Symbol;Acc:HGNC:21732]	118429	1482.44	1085.01	1974.26	1.63645	0.454678	3.10899	4.55907e-05	0.00588996	protein_coding	4	79901146	80125454	-1	666.676	1254.18	1361.42	1039.93	1109.22	1079.23	1363.36	1403.54	1137.71	1606.27	1156.59	849.93	726.03	925.079	1438.86	1053.74	1345.3	1145.63	614.846	644.657	862.991	716.568	1407.01	1041.09	1340.86	1312.33	1325.39	1230.61	2891.92	1440.7	1198.74	1842.44	1240.42
ENSG00000187608	ISG15	ISG15 ubiquitin like modifier [Source:HGNC Symbol;Acc:HGNC:4053]	9636	772.009	274.345	1387.34	3.38586	0.881431	10.4531	4.6513e-05	0.00591951	protein_coding	1	1001138	1014540	1	140.954	207.991	97.7528	123.957	139.88	1438.16	1298.99	188.919	176.706	112.821	147.416	449.61	153.598	127.188	67.0399	249.975	149.836	50.133	67.3804	174.177	198.774	1828.93	235.543	705.494	1477.53	1937.83	337.687	616.481	1275.93	686.996	1236	308.598	921.407
ENSG00000120436	GPR31	G protein-coupled receptor 31 [Source:HGNC Symbol;Acc:HGNC:4486]	2853	13.1196	0.454547	28.777	6.6277	1.56728	98.8867	4.6574e-05	0.00591951	protein_coding	6	167155247	167157980	-1	0	0	0.647369	0	3.68105	0	0	0	0	0	1.56826	0	1.49851	0	0	0	0	0.618926	1.53137	0	0	17.3977	2.08445	1.49153	0	41.3935	0	7.05894	81.5599	78.0677	0	0	6.19433
ENSG00000187535	IFT140	intraflagellar transport 140 [Source:HGNC Symbol;Acc:HGNC:29077]	9742	341.315	381.705	291.674	-1.26764	0.400822	-2.40768	4.70332e-05	0.00591951	protein_coding	16	1510427	1612072	-1	597.151	408.972	378.064	371.275	498.168	436.424	328.003	439.162	211.525	262.931	331.686	494.904	516.238	568.793	261.155	342.274	373.247	168.967	305.509	424.432	296.934	546.94	152.165	347.527	271.816	233.03	441.414	370.595	244.68	259.753	314.694	324.599	387.146
ENSG00000248712	CCDC153	coiled-coil domain containing 153 [Source:HGNC Symbol;Acc:HGNC:27446]	283152	27.606	36.3267	16.851	-2.51805	0.816058	-5.72806	4.81705e-05	0.00602378	protein_coding	11	119189638	119196769	-1	17.1431	32.7177	30.4264	83.4327	16.7692	39.1558	33.72	36.5968	16.539	13.3856	44.6953	23.3131	33.7166	25.2797	41.0244	37.6886	30.6116	9.28389	29.8618	66.0673	101.432	6.52414	10.4223	14.9153	24.2964	32.1949	42.6431	20.0003	13.8237	12.7747	10.3518	22.8591	21.6802
ENSG00000134333	LDHA	lactate dehydrogenase A [Source:HGNC Symbol;Acc:HGNC:6535]	3939	7017.01	6475.84	7690.14	1.39348	0.389656	2.62712	5.02732e-05	0.00617362	protein_coding	11	18394560	18408425	1	6557.23	8774.58	7040.79	5920.74	5468.4	8107.7	6462.74	4852.04	5778.2	5886.78	4325.25	5627.79	7128.43	6886.35	6787.04	4233.43	5763.58	6453.54	7963.14	8376.53	7598.41	7713.71	4977.68	5506.73	2204.9	13310.3	5573.57	3491.82	7350.07	5697.52	4010.28	8604.17	2429.73
ENSG00000173451	THAP2	THAP domain containing 2 [Source:HGNC Symbol;Acc:HGNC:20854]	83591	304.185	130.973	518.436	2.36318	0.643587	5.14503	4.97445e-05	0.00617362	protein_coding	12	71664301	71680644	1	72.3819	91.1422	207.806	91.7759	124.747	128.072	173.964	172.598	140.146	117.602	145.064	84.5933	113.887	139.828	102.061	197.673	150.91	75.509	71.2089	220.224	129.244	308.809	217.825	171.526	86.5561	222.298	103.726	196.474	1737.64	1092.95	761.892	336.029	122.338
ENSG00000263724	DLGAP1-AS3	DLGAP1 antisense RNA 3 [Source:HGNC Symbol;Acc:HGNC:27317]	201477	23.6205	35.5763	8.87141	-4.56327	1.34372	-23.6419	5.03181e-05	0.00617362	lncRNA	18	3878058	3897069	1	14.2859	41.2866	41.4316	38.1406	35.1745	32.6298	15.3273	74.6773	47.0056	6.69278	38.4223	26.6436	31.4688	45.8194	8.00476	97.6827	44.0378	4.95141	18.3765	49.05	35.992	45.669	3.12668	17.8984	0	10.7316	11.5252	7.05894	1.38237	11.3553	0	2.28591	12.3887
ENSG00000117480	FAAH	fatty acid amide hydrolase [Source:HGNC Symbol;Acc:HGNC:3553]	2166	448.089	582.638	282.142	-1.1174	0.348762	-2.16956	5.3653e-05	0.00634341	protein_coding	1	46394317	46413848	1	802.868	645.006	738.648	603.695	556.656	734.987	322.639	636.488	461.351	400.611	642.986	530.873	669.086	662.802	542.322	510.719	499.453	394.256	464.006	715.729	700.209	387.099	175.094	374.374	293.076	229.964	500.192	291.77	240.533	239.881	173.91	304.026	151.761
ENSG00000288658		novel protein, ortholog of Gm2102 (M. musculus)		41.052	0.622938	91.0409	6.95758	1.64543	124.291	5.35822e-05	0.00634341	protein_coding	2	222317242	222320208	-1	0	0	2.58948	0.595948	0	0	0	0	0	4.78056	0.784129	0	0	0.78999	0	0	0.537046	1.23785	0.765687	1.00102	0	4.34943	34.3935	0	1.51853	21.4633	13.8302	3.52947	160.355	208.654	12.4222	0	0
ENSG00000243649	CFB	complement factor B [Source:HGNC Symbol;Acc:HGNC:1037]	629	25.5351	1.77088	54.9188	4.68929	1.18872	25.7998	5.32784e-05	0.00634341	protein_coding	6	31945650	31952084	1	0	2.33698	0	0.595948	0	2.44724	13.7945	0	0	0	0	3.99654	0	0	0	5.38409	0	5.57034	3.06275	0	0	67.4161	38.5624	38.7798	22.7779	21.4633	13.8302	36.4712	171.414	204.396	35.1961	41.1464	21.6802
ENSG00000010818	HIVEP2	HIVEP zinc finger 2 [Source:HGNC Symbol;Acc:HGNC:4921]	3097	1929.54	1169.7	2869.66	1.85874	0.517589	3.6269	5.29669e-05	0.00634341	protein_coding	6	142751469	142956698	-1	1100.01	672.271	950.985	1053.04	1375.89	891.61	1882.19	892.665	1470.23	975.234	2203.4	1924.33	543.211	1044.37	1000.59	1762.13	1095.04	1735.47	1042.1	554.565	394.276	919.904	4310.65	1431.87	1826.79	2299.64	1348.44	2963.58	4170.61	2290.93	3269.1	864.074	2804.48
ENSG00000173715	C11orf80	chromosome 11 open reading frame 80 [Source:HGNC Symbol;Acc:HGNC:26197]	79703	232.93	261.621	197.683	-2.13305	0.769395	-4.38644	5.29367e-05	0.00634341	protein_coding	11	66744451	66843516	1	439.054	204.096	299.732	327.771	311.253	160.702	206.918	224.526	100.975	87.0061	315.22	285.086	398.605	497.694	143.085	373.809	330.821	128.118	235.832	228.232	195.502	91.338	81.2937	198.374	440.373	78.1877	216.673	304.711	134.09	122.07	310.554	123.439	794.423
ENSG00000205978	NYNRIN	NYN domain and retroviral integrase containing [Source:HGNC Symbol;Acc:HGNC:20165]	57523	130.153	163.019	89.6035	-2.02978	0.712545	-4.08341	5.24512e-05	0.00634341	protein_coding	14	24399003	24419283	1	123.811	186.958	204.569	196.663	300.619	262.67	195.423	306.622	84.4359	70.7523	218.772	54.6193	226.276	241.737	83.0494	114.604	219.115	51.9898	88.8197	101.103	90.7981	121.784	58.3647	43.2544	69.8523	102.717	206.3	68.2365	121.649	48.26	95.2365	166.871	23.2288
ENSG00000120913	PDLIM2	PDZ and LIM domain 2 [Source:HGNC Symbol;Acc:HGNC:13992]	64236	589.477	583.263	597.608	-1.37278	0.450698	-2.58968	5.44396e-05	0.00639764	protein_coding	8	22578279	22598025	1	355.243	505.567	492.001	571.514	466.675	451.923	542.585	531.643	356.024	736.206	923.704	606.141	514.739	387.095	700.416	1028.36	631.567	688.865	346.09	748.763	663.399	548.028	424.186	577.222	914.154	579.509	747.983	854.132	374.623	349.176	933.732	1037.8	943.087
ENSG00000076864	RAP1GAP	RAP1 GTPase activating protein [Source:HGNC Symbol;Acc:HGNC:9858]	5909	194.909	19.5036	411.663	4.41492	1.12045	21.3316	5.52803e-05	0.00645753	protein_coding	1	21596215	21669363	-1	16.1907	37.3917	22.0106	20.2622	1.63602	18.7622	0.766363	38.0805	54.8398	29.6395	12.5461	10.6574	1.49851	17.3798	19.0113	6.15324	5.90751	32.8031	31.3932	13.0133	19.632	83.7265	73.9981	132.746	1624.82	16.864	121.014	302.358	145.149	465.568	2532.05	11.4296	44.9089
ENSG00000134070	IRAK2	interleukin 1 receptor associated kinase 2 [Source:HGNC Symbol;Acc:HGNC:6113]	3656	1044.8	198.85	2090.95	3.53603	0.928033	11.5998	5.65144e-05	0.0065624	protein_coding	3	10164919	10243745	1	56.1912	64.6564	141.127	122.169	61.3508	123.178	104.992	81.1064	76.6017	742.899	106.642	159.861	218.034	25.2797	324.193	142.294	96.1313	278.517	443.333	670.683	136.606	1901.79	1697.79	184.95	179.186	1746.19	138.302	449.419	7249.15	4295.14	416.142	576.049	178.087
ENSG00000214787	MS4A4E	membrane spanning 4-domains A4E [Source:HGNC Symbol;Acc:HGNC:14284]	643680	285.013	353.715	200.269	-2.46534	0.956855	-5.52259	5.80146e-05	0.00669674	protein_coding	11	60200270	60243137	-1	234.289	500.893	348.932	445.769	328.022	478.027	337.2	508.399	77.4721	114.733	678.271	357.69	473.53	371.295	294.175	378.424	459.712	212.911	192.187	405.413	230.676	265.315	16.6756	420.612	121.482	95.0517	371.11	205.886	63.5891	136.264	227.739	756.636	97.5608
ENSG00000180900	SCRIB	scribble planar cell polarity protein [Source:HGNC Symbol;Acc:HGNC:30377]	23513	1407.45	1370.91	1453.6	-1.27769	0.419441	-2.4245	5.83998e-05	0.00670154	protein_coding	8	143790920	143815773	-1	1518.12	1703.66	1480.53	1695.47	1594.3	1691.86	1517.4	1498.49	556.233	720.908	1667.84	1228.27	1407.1	1781.43	833.496	1885.2	1494.6	539.085	1047.46	1378.4	1549.29	1631.04	785.839	2420.75	2007.49	956.649	2265.85	1825.91	1357.49	1023.4	2049.65	1741.86	1714.28
ENSG00000108515	ENO3	enolase 3 [Source:HGNC Symbol;Acc:HGNC:3354]	2027	232.765	188.878	287.184	-1.00723	0.31054	-2.01004	6.34803e-05	0.00719984	protein_coding	17	4948092	4957131	1	195.241	172.937	152.779	229.44	204.503	190.885	219.946	140.947	90.5292	122.382	281.502	211.15	179.072	188.018	134.08	297.663	240.597	98.4093	209.798	228.232	178.324	337.081	259.514	328.137	369.002	271.357	342.297	330.594	320.71	322.207	325.046	304.026	345.334
ENSG00000038210	PI4K2B	phosphatidylinositol 4-kinase type 2 beta [Source:HGNC Symbol;Acc:HGNC:18215]	55300	1012.66	984.217	1048.35	1.14505	0.325798	2.21154	6.44253e-05	0.00726479	protein_coding	4	25160663	25279204	1	1177.16	1086.7	945.806	1030.99	1174.25	1349.24	1152.61	809.086	1504.18	636.77	864.894	1079.73	764.242	1269.51	982.584	693.009	839.941	1038.56	762.624	509.519	997.143	702.432	928.624	733.833	1018.93	470.659	815.981	569.422	1168.1	1092.95	801.229	555.476	972.51
ENSG00000129250	KIF1C	kinesin family member 1C [Source:HGNC Symbol;Acc:HGNC:6317]	10749	694.878	706.466	681.053	-1.00766	0.3153	-2.01065	6.73122e-05	0.00754671	protein_coding	17	4997950	5028401	1	675.247	734.591	664.848	648.987	575.879	681.964	902.776	670.612	444.812	728.557	753.548	639.446	836.171	695.981	695.413	613.786	821.681	768.087	689.118	1029.05	565.239	648.065	637.843	718.918	700.041	462.994	787.168	904.721	584.743	469.826	973.068	1398.98	698.411
ENSG00000184371	CSF1	colony stimulating factor 1 [Source:HGNC Symbol;Acc:HGNC:2432]	1435	755.545	456.26	1125.91	2.18811	0.613145	4.55709	6.7875e-05	0.00756632	protein_coding	1	109910242	109930992	1	361.91	427.667	472.58	394.517	350.518	530.235	431.462	328.382	221.1	1385.41	239.159	312.396	464.539	286.766	609.362	197.673	263.69	255.617	541.341	753.768	753.379	1391.82	717.052	2492.35	312.817	495.189	282.366	657.658	1827.49	1077.33	366.453	436.609	227.642
ENSG00000205413	SAMD9	sterile alpha motif domain containing 9 [Source:HGNC Symbol;Acc:HGNC:1348]	54809	2158.23	1389.67	3108.47	2.52204	0.698014	5.74395	6.87741e-05	0.00762298	protein_coding	7	93099513	93118023	-1	567.627	786.783	833.812	1225.27	2098.61	2107.07	5431.98	1860.01	763.405	453.197	2368.85	1102.38	677.328	1382.48	920.547	2273.62	1602.55	842.359	742.716	428.436	714.115	2717.3	1794.71	1270.78	3702.17	1005.71	852.862	1489.44	3385.43	1575.55	3180.07	738.349	2096.78
ENSG00000228340	MIR646HG	MIR646 host gene [Source:HGNC Symbol;Acc:HGNC:27659]	284757	217.437	291.974	125.486	-2.05946	0.76398	-4.16829	6.92023e-05	0.00762711	lncRNA	20	60087826	60653784	1	139.049	296.796	380.653	865.316	192.232	394.821	176.263	178.533	45.2646	166.363	162.315	193.166	183.568	158.788	268.159	227.67	209.448	233.335	235.832	450.459	973.421	162.016	37.5202	167.051	203.483	82.787	163.657	188.239	192.15	124.908	169.769	116.581	153.31
ENSG00000158669	GPAT4	glycerol-3-phosphate acyltransferase 4 [Source:HGNC Symbol;Acc:HGNC:20880]	137964	2655.63	2565.56	2768.76	1.16494	0.334628	2.24224	7.29214e-05	0.00799186	protein_coding	8	41577187	41625001	1	2452.41	2197.54	2531.21	1800.95	1930.91	2014.08	2118.23	2349.12	2134.4	3050	2149.3	2720.97	3048.73	2268.06	3742.22	2852.8	2147.65	3275.36	2837.64	3645.71	2609.42	2074.68	2709.79	1354.31	1602.05	3690.15	1576.64	1582.38	3370.22	2845.92	1637.65	2633.37	1548.58
ENSG00000103569	AQP9	aquaporin 9 [Source:HGNC Symbol;Acc:HGNC:643]	366	2866.58	936.891	5252.49	3.50933	0.938015	11.3871	7.387e-05	0.00805059	protein_coding	15	58138169	58185911	1	210.479	421.435	449.274	256.853	283.032	371.98	2588.01	626.102	1379.7	3343.52	693.17	848.598	403.849	211.717	2519.5	708.392	323.302	1194.53	342.262	885.902	1613.1	2009.44	2888.01	116.339	358.372	5241.64	554.36	1094.14	12608.6	9728.66	2101.41	2587.65	66.5891
ENSG00000248323	LUCAT1	lung cancer associated transcript 1 [Source:HGNC Symbol;Acc:HGNC:48498]		1802.92	194.063	3792.37	4.19844	1.09411	18.3593	7.51706e-05	0.00814682	lncRNA	5	91054834	91314547	-1	36.191	95.0372	207.806	299.166	35.5835	92.1793	104.225	76.6555	294.22	511.52	227.397	56.6176	71.9287	90.0589	396.236	86.9146	145.003	160.302	104.133	443.452	540.698	4378.79	2719.17	129.763	92.6302	1663.4	47.2531	222.357	14494.2	17806.5	1550.7	500.614	139.373
ENSG00000178445	GLDC	glycine decarboxylase [Source:HGNC Symbol;Acc:HGNC:4313]	2731	136.715	202.606	55.3545	-2.48591	0.991554	-5.60189	7.75698e-05	0.00827732	protein_coding	9	6532467	6645729	-1	245.718	210.328	244.706	379.619	413.504	198.226	212.283	157.762	81.8245	51.63	226.613	150.536	167.834	604.343	21.0125	6.9224	350.691	28.4706	54.3638	139.142	309.204	35.8828	32.309	55.1866	41.0002	68.9891	86.4387	54.1186	31.7945	52.5183	72.4625	34.2887	134.727
ENSG00000188549	CCDC9B	coiled-coil domain containing 9B [Source:HGNC Symbol;Acc:HGNC:33488]	388115	146.163	178.956	105.725	-2.53896	1.02225	-5.81172	7.68243e-05	0.00827732	protein_coding	15	40331452	40340967	-1	80.9535	194.748	156.663	382.598	186.915	334.456	128.749	242.33	38.3008	32.5078	270.524	162.526	131.12	150.888	93.0553	173.06	258.856	64.3683	89.5853	153.156	432.722	116.347	25.0134	201.357	132.112	61.3237	141.759	158.826	17.9708	68.1318	223.599	219.447	216.802
ENSG00000164107	HAND2	heart and neural crest derivatives expressed 2 [Source:HGNC Symbol;Acc:HGNC:4808]	9464	31.8966	0.156702	71.1629	5.54298	1.48888	46.6232	7.93755e-05	0.00832523	protein_coding	4	173524969	173530229	-1	0	0	0	0	0	0	0.766363	0	0	0.956112	1.56826	0	0	0	0	0	0	0	0	0	0	11.9609	3.12668	2.98306	9.11116	366.409	19.5928	111.767	371.858	15.6135	161.488	9.14364	7.74292
ENSG00000174945	AMZ1	archaelysin family metallopeptidase 1 [Source:HGNC Symbol;Acc:HGNC:22231]	155185	112.412	11.198	237.588	2.82409	0.78604	7.08167	7.93651e-05	0.00832523	protein_coding	7	2679522	2775500	1	2.85718	5.45295	27.8369	11.919	6.54408	3.26298	7.66363	4.45096	13.9276	22.9467	38.4223	2.66436	16.4837	4.73994	25.0149	9.99902	1.07409	13.6164	9.18824	3.00306	4.09	353.391	384.582	117.831	136.667	254.493	35.728	127.061	369.093	333.562	165.629	102.866	151.761
ENSG00000140379	BCL2A1	BCL2 related protein A1 [Source:HGNC Symbol;Acc:HGNC:991]	597	1709.2	685.874	2974.91	2.72188	0.755139	6.59734	7.95538e-05	0.00832523	protein_coding	15	79960892	79971196	-1	379.053	328.735	1260.43	250.894	163.602	715.409	852.962	491.09	665.912	1219.04	295.617	470.925	440.563	128.768	2042.21	434.573	265.301	1236.61	408.877	1781.82	570.965	2582.47	1799.93	544.409	358.372	2945.07	425.278	1278.85	5724.4	7158.1	2687.33	2441.35	425.86
ENSG00000250318		ribosomal protein L13a (RPL13A) pseudogene		28.1257	28.5664	27.6037	-2.85728	0.947426	-7.24647	7.98041e-05	0.00832523	unprocessed_pseudogene	22	30653877	30654814	-1	22.8575	23.3698	27.1895	40.5244	27.8124	35.8928	28.3554	47.9715	38.3008	11.4733	41.5588	13.3218	9.74034	25.2797	3.00178	59.9941	27.9264	9.90282	13.7824	18.0184	73.6201	14.1356	17.7179	59.6612	54.667	35.2611	18.4403	60.001	29.0298	22.7106	39.3368	38.8605	34.0688
ENSG00000110436	SLC1A2	solute carrier family 1 member 2 [Source:HGNC Symbol;Acc:HGNC:10940]	6506	37.7034	3.06382	80.5499	3.41255	0.939226	10.6483	8.21206e-05	0.00847624	protein_coding	11	35251205	35420063	-1	0	3.11597	1.94211	4.17163	0.409005	1.63149	0	0	6.96379	7.64889	0.784129	5.32871	0	6.31992	0	0	1.07409	4.33248	3.06275	11.0112	6.54401	80.4644	55.238	85.0173	7.59264	122.647	33.423	28.2358	211.503	198.718	55.8997	75.435	38.7146
ENSG00000226380		novel transcript		227.689	32.7683	468.762	3.11454	0.855697	8.66104	8.43671e-05	0.00862412	lncRNA	7	130876809	130913310	-1	32.3814	22.5908	64.0896	20.8582	14.7242	10.6047	15.3273	9.89103	53.9694	60.235	5.4889	39.9654	10.4896	10.2699	42.025	34.612	4.29637	41.4681	48.2383	77.0785	69.5301	613.269	630.547	119.322	112.371	180.905	24.2028	176.474	1848.23	1027.66	186.332	196.588	114.595
ENSG00000166432	ZMAT1	zinc finger matrin-type 1 [Source:HGNC Symbol;Acc:HGNC:29377]	84460	1369.93	1736.63	917.756	-2.11642	0.838221	-4.33618	8.44375e-05	0.00862412	protein_coding	X	101882288	101932079	-1	1943.84	1704.44	1963.47	2448.15	2120.28	2146.23	1754.97	1703.24	564.937	736.206	2517.05	1979.62	2402.12	2084.78	746.444	2495.14	1683.1	808.937	1756.49	1396.42	1513.3	820.954	156.334	1352.82	1999.9	738.95	1278.14	1531.79	342.828	278.205	1604.53	985.227	2442.12
ENSG00000179104	TMTC2	transmembrane O-mannosyltransferase targeting cadherins 2 [Source:HGNC Symbol;Acc:HGNC:25440]	160335	259.703	313.68	193.146	-2.3642	0.95998	-5.14866	8.52106e-05	0.00865775	protein_coding	12	82686880	83134870	1	145.716	458.827	493.943	335.518	316.161	360.56	347.162	385.75	53.9694	181.661	504.979	464.264	310.942	228.307	246.146	389.193	314.709	287.801	245.785	374.381	141.514	184.851	9.38004	266.984	136.667	213.1	269.689	218.827	106.443	103.617	248.443	692.631	74.332
ENSG00000166833	NAV2	neuron navigator 2 [Source:HGNC Symbol;Acc:HGNC:15997]	89797	83.0882	108.776	51.4202	-2.61822	1.06069	-6.13992	8.6723e-05	0.00867586	protein_coding	11	19350724	20121601	1	90.4774	148.009	127.532	231.228	88.7541	119.099	75.1036	41.0478	11.3162	20.0783	84.6859	36.6349	167.084	84.529	103.061	210.749	83.2422	29.0895	51.301	167.17	314.112	97.8621	10.4223	19.3899	12.1482	44.4597	72.6085	55.2951	189.385	45.4212	37.2665	52.5759	10.8401
ENSG00000173391	OLR1	oxidized low density lipoprotein receptor 1 [Source:HGNC Symbol;Acc:HGNC:8133]	4973	1305.65	221.249	2646.53	4.19425	1.10412	18.3061	8.82166e-05	0.00878025	protein_coding	12	10158301	10172138	-1	22.8575	126.976	391.011	1158.52	282.623	241.461	183.927	79.6228	85.3064	50.6739	181.134	26.6436	29.9703	21.3297	109.065	613.017	82.7051	99.0282	50.5353	67.0683	742.745	1595.15	1347.6	189.424	133.63	3656.42	25.3553	347.065	4119.47	5415.06	2159.38	228.591	263.259
ENSG00000136052	SLC41A2	solute carrier family 41 member 2 [Source:HGNC Symbol;Acc:HGNC:31045]	84102	103.537	48.2913	171.874	2.43004	0.690288	5.3891	8.9656e-05	0.00880555	protein_coding	12	104802553	104958744	-1	26.667	31.1597	49.2001	35.1609	35.1745	33.4456	78.169	57.368	86.1769	81.2695	42.343	28.6418	31.4688	30.8096	23.0137	72.3006	66.0567	47.6573	103.368	35.0357	19.632	64.154	152.165	146.17	68.3337	121.114	64.5409	96.4722	258.503	177.427	47.6182	57.1478	26.3259
ENSG00000183484	GPR132	G protein-coupled receptor 132 [Source:HGNC Symbol;Acc:HGNC:17482]	29933	1604.86	396.319	3099.7	2.31307	0.658082	4.96938	8.94501e-05	0.00880555	protein_coding	14	105049395	105065445	-1	149.526	228.245	323.685	219.905	336.202	225.146	454.453	395.147	501.393	478.056	508.115	335.043	89.1616	291.506	643.383	834.534	397.414	1018.75	444.098	178.182	270.758	3207.7	4435.72	808.41	727.375	3496.98	784.863	2145.92	7156.54	7612.31	2014.46	772.638	1704.99
ENSG00000151327	FAM177A1	family with sequence similarity 177 member A1 [Source:HGNC Symbol;Acc:HGNC:19829]	283635	863.23	409.804	1424.36	1.55707	0.454705	2.94255	9.03019e-05	0.00880805	protein_coding	14	35044907	35113130	1	302.861	338.862	373.532	426.103	265.853	350.771	379.35	309.095	554.492	493.354	367.756	510.224	280.971	255.957	418.249	322.276	307.728	586.742	957.108	414.422	390.186	1226.54	1583.14	862.105	718.263	4078.02	654.629	1323.55	2485.5	1663.55	1070.38	877.789	1322.49
ENSG00000172939	OXSR1	oxidative stress responsive kinase 1 [Source:HGNC Symbol;Acc:HGNC:8508]	9943	2527.92	1947.14	3247.36	1.18966	0.347104	2.28099	9.11756e-05	0.00884902	protein_coding	3	38165089	38255484	1	1622.88	1795.58	2197.82	1778.9	1854.43	2305.3	2045.42	1766.54	1967.27	2642.69	1763.51	1727.17	1879.89	1885.71	2443.45	1820.59	1769.57	1778.17	1650.05	2462.51	1732.53	2946.74	2706.66	2025.5	1794.9	3535.31	1608.91	1807.09	5152.1	4005.58	2449.23	3095.12	1626.01
ENSG00000249173	LINC01093	long intergenic non-protein coding RNA 1093 [Source:HGNC Symbol;Acc:HGNC:49218]	100506229	12.46	0.303779	27.4919	5.84563	1.53233	57.5056	9.2885e-05	0.00888236	lncRNA	4	184892858	184899553	-1	0	0	0	0	0	0.815746	2.29909	0	0	0.956112	0	0	0.749257	0.78999	0	0.769155	0	0	0	0	0	60.892	0	2.98306	3.03705	0	1.15252	1.17649	58.0596	139.102	64.1811	0	1.54858
ENSG00000134326	CMPK2	cytidine/uridine monophosphate kinase 2 [Source:HGNC Symbol;Acc:HGNC:27015]	129607	1160.41	540.733	1926.57	2.99169	0.8307	7.95403	9.39902e-05	0.0089442	protein_coding	2	6840570	6866635	-1	268.575	550.748	232.406	277.116	341.11	2398.29	1794.82	456.966	380.397	372.883	278.366	1256.91	415.838	293.086	266.158	211.518	303.968	321.223	332.308	236.241	366.464	3869.9	322.048	572.748	1412.23	519.718	403.381	640.011	1309.11	919.78	1142.84	418.322	1043.75
ENSG00000164342	TLR3	toll like receptor 3 [Source:HGNC Symbol;Acc:HGNC:11849]	7098	28.6427	18.7557	40.8738	2.07143	0.604396	4.20304	9.61407e-05	0.00906045	protein_coding	4	186069155	186088073	1	11.4287	30.3807	20.7158	16.0906	15.5422	28.5511	20.6918	24.7276	20.0209	23.9028	29.7969	15.3201	12.7374	14.2198	6.00357	13.0756	16.6484	16.0921	30.6275	24.0245	3.272	42.4069	20.8445	22.373	22.7779	62.8568	27.6604	25.8828	15.2061	55.3571	51.759	36.5746	7.74292
ENSG00000165617	DACT1	dishevelled binding antagonist of beta catenin 1 [Source:HGNC Symbol;Acc:HGNC:17748]	51339	156.691	215.507	84.1249	-1.53178	0.545524	-2.89143	9.58165e-05	0.00906045	protein_coding	14	58633967	58648321	1	387.624	200.201	313.974	236.591	304.3	199.042	147.908	177.049	111.421	108.997	178.781	210.484	306.446	283.607	178.106	164.599	196.022	120.072	160.029	338.345	202.046	50.0184	41.6891	83.5257	126.038	59.7906	126.777	121.179	113.354	55.3571	165.629	98.2941	91.3664
ENSG00000186827	TNFRSF4	TNF receptor superfamily member 4 [Source:HGNC Symbol;Acc:HGNC:11918]	7293	115.782	26.8069	225.832	2.81491	0.793206	7.03677	9.9022e-05	0.00924268	protein_coding	1	1211340	1214153	-1	19.0479	21.8118	23.3053	6.55542	13.0882	20.3936	42.15	3.46186	75.7312	39.2006	27.4445	39.9654	26.9732	7.10991	52.0309	23.0747	20.9448	11.1407	64.3177	17.0173	8.18001	100.037	170.925	59.6612	68.3337	433.865	59.9308	142.355	703.627	330.723	126.292	68.5773	68.1377
ENSG00000165959	CLMN	calmin [Source:HGNC Symbol;Acc:HGNC:19972]	79789	880.627	781.214	1004.06	-1.3187	0.463873	-2.49441	9.95881e-05	0.00925126	protein_coding	14	95181940	95319908	-1	457.149	645.006	610.469	554.827	595.512	526.156	1086.7	1207.69	530.118	796.441	1335.37	731.366	908.849	806.58	1236.74	721.468	1041.87	1167.91	432.613	554.565	458.08	571.95	1000.54	584.68	1046.27	1379.78	630.426	985.899	937.248	1142.63	981.35	2459.64	1167.63
ENSG00000251414		novel transcript		17.2682	0.240779	38.3284	3.18753	1.06461	9.11051	0.000101651	0.00935382	lncRNA	5	176354206	176356168	1	0	3.11597	0	0	0.409005	0	0	0	0	0	0	0	0	0	0	0	0	0	1.53137	0	0	42.4069	46.9002	10.4407	34.9261	58.2575	24.2028	41.1772	89.8541	29.8077	93.1661	20.5732	41.8118
ENSG00000127074	RGS13	regulator of G protein signaling 13 [Source:HGNC Symbol;Acc:HGNC:9995]	6003	72.7895	25.3874	131.419	2.9007	0.816389	7.46791	0.000102478	0.00938564	protein_coding	1	192636138	192660311	1	33.3338	30.3807	30.4264	16.0906	2.04503	17.1307	30.6545	11.3747	36.5599	26.7711	10.1937	34.6366	29.9703	2.36997	44.0262	0.769155	6.44456	65.6062	77.3344	18.0184	8.99801	222.908	180.305	59.6612	37.9632	147.177	49.5582	48.2361	221.179	119.231	47.6182	20.5732	55.749
ENSG00000064932	SBNO2	strawberry notch homolog 2 [Source:HGNC Symbol;Acc:HGNC:29158]	22904	3566.52	2054.93	5436.91	1.55333	0.458517	2.93494	0.000104268	0.00946072	protein_coding	19	1107637	1174268	-1	1764.79	1402.19	1591.88	1532.78	1146.03	1881.11	2791.09	1423.81	2250.17	2442.86	1568.26	2439.22	1437.07	1053.85	3560.12	1602.92	1405.99	4249.55	2605.63	3313.38	1690.81	4497.31	5249.7	2583.33	3261.8	5841.08	2831.73	3862.42	7944.49	8553.38	3710.08	4425.52	2742.54
ENSG00000101213	PTK6	protein tyrosine kinase 6 [Source:HGNC Symbol;Acc:HGNC:9617]	5753	62.0523	25.6043	107.155	-3.54534	1.15584	-11.6749	0.00010476	0.00946137	protein_coding	20	63528001	63537376	-1	1.90479	31.1597	19.4211	13.7068	23.3133	25.2881	30.6545	29.1785	5.22284	4.78056	69.0033	47.9584	15.7344	19.7498	10.0059	44.611	44.0378	5.57034	13.0167	22.0224	61.3501	115.26	109.434	58.1697	138.186	248.361	140.607	154.12	67.7362	225.687	84.8847	59.4337	196.67
ENSG00000178803	ADORA2A-AS1	ADORA2A antisense RNA 1 [Source:HGNC Symbol;Acc:HGNC:37122]	646023	212.074	10.6765	461.164	4.23492	1.13017	18.8295	0.000105613	0.00949445	lncRNA	22	24429206	24495074	-1	3.80958	10.1269	7.12106	18.4744	1.63602	21.2094	0.766363	2.47276	8.70473	22.9467	2.35239	7.32698	18.7314	0	38.0226	0	0	2.4757	1.53137	45.0459	11.452	621.968	315.795	155.119	86.5561	131.846	38.033	443.537	1693.4	1251.92	616.967	173.729	303.522
ENSG00000182685	BRICD5	BRICHOS domain containing 5 [Source:HGNC Symbol;Acc:HGNC:28309]	283870	86.6131	105.338	63.529	-2.16184	0.842862	-4.47486	0.000108909	0.00965727	protein_coding	16	2209253	2211950	-1	31.429	84.9103	64.0896	206.794	179.962	110.126	114.188	159.74	28.7256	15.2978	147.416	75.9342	43.4569	111.389	84.05	275.358	138.021	35.8977	47.4726	68.0693	189.776	35.8828	54.1958	93.9664	135.149	36.7942	97.9638	78.8249	48.383	41.163	76.6033	64.0055	119.241
ENSG00000154099	DNAAF1	dynein axonemal assembly factor 1 [Source:HGNC Symbol;Acc:HGNC:30539]	123872	187.506	15.1611	400.68	4.11683	1.10496	17.3496	0.000108656	0.00965727	protein_coding	16	84145287	84178767	1	20.9527	9.34792	16.8316	5.95948	0.409005	15.4992	22.2245	6.92372	25.2437	10.5172	4.70477	2.66436	21.7284	8.68989	16.0095	0.769155	1.07409	13.6164	7.65687	105.107	2.454	864.449	133.405	56.6782	18.2223	190.103	23.0503	109.414	1889.7	845.97	244.302	150.87	32.5203
ENSG00000165474	GJB2	gap junction protein beta 2 [Source:HGNC Symbol;Acc:HGNC:4284]	2706	235.485	7.99542	516.732	5.94447	1.48985	61.5836	0.000111084	0.00980552	protein_coding	13	20187463	20192938	-1	6.66676	0.778993	23.9527	5.95948	0	9.78895	4.59818	1.97821	34.8189	42.0689	0.784129	14.654	2.99703	3.15996	2.00119	0	2.68523	0	0	11.0112	0	31.5333	149.038	11.9322	3.03705	62.8568	10.3726	40.0007	2290.59	716.804	298.132	98.2941	0
ENSG00000187609	EXD3	exonuclease 3'-5' domain containing 3 [Source:HGNC Symbol;Acc:HGNC:26023]	54932	228.671	218.55	241.38	-1.15728	0.391242	-2.23037	0.000112505	0.0098683	protein_coding	9	137306896	137423211	-1	229.527	237.593	199.39	210.965	213.91	220.251	145.609	247.77	286.386	89.8745	225.829	196.496	314.688	258.327	157.093	326.122	231.467	146.686	196.016	156.159	299.388	215.297	198.023	280.408	416.077	234.563	327.314	337.653	176.943	184.524	310.554	242.306	447.541
ENSG00000178226	PRSS36	serine protease 36 [Source:HGNC Symbol;Acc:HGNC:26906]	146547	25.1649	28.1865	21.4443	-2.4561	0.8497	-5.4873	0.000112807	0.0098683	protein_coding	16	31138926	31150083	-1	6.66676	35.0547	30.4264	29.2014	43.3546	44.0503	19.1591	33.1349	13.9276	29.6395	57.2414	15.3201	14.2359	35.5496	24.0143	21.5363	37.0562	24.757	20.6735	16.0163	40.9	28.2713	7.29559	25.356	4.55558	9.19855	39.1855	21.1768	11.059	28.3883	39.3368	16.0014	6.19433
ENSG00000188886	ASTL	astacin like metalloendopeptidase [Source:HGNC Symbol;Acc:HGNC:31704]	431705	201.958	24.7191	421.153	3.25385	0.90829	9.53907	0.00011397	0.00992269	protein_coding	2	96123850	96138436	-1	32.3814	14.8009	27.1895	11.919	2.86304	13.8677	29.8882	1.48365	42.6532	42.0689	7.05716	48.6245	11.2389	3.15996	37.022	14.614	3.75932	80.4604	71.2089	22.0224	0.818001	390.361	597.196	96.9495	68.3337	533.516	47.2531	174.121	457.565	1652.2	685.289	121.153	229.19
ENSG00000081041	CXCL2	C-X-C motif chemokine ligand 2 [Source:HGNC Symbol;Acc:HGNC:4603]	2920	2032.13	246.615	4240.02	4.29333	1.1463	19.6075	0.000114446	0.00992269	protein_coding	4	74097040	74099196	-1	115.24	203.317	306.206	30.3933	44.1726	281.432	22.2245	50.4442	351.671	1060.33	32.9334	125.225	323.679	34.7596	1426.85	36.9195	53.7046	192.486	88.8197	383.391	14.724	3097.88	2751.48	322.171	212.594	1612.81	96.8113	578.833	15551.7	9393.68	5091.01	1467.55	151.761
ENSG00000160111	CPAMD8	C3 and PZP like alpha-2-macroglobulin domain containing 8 [Source:HGNC Symbol;Acc:HGNC:23228]	27151	106.239	100.301	113.642	-1.94755	0.743707	-3.8572	0.000115462	0.00996655	protein_coding	19	16892951	17026815	-1	107.62	77.1203	62.1474	132.896	87.5271	173.754	91.9636	203.261	17.4095	23.9028	145.064	143.209	73.4272	157.998	51.0303	114.604	178.299	49.5141	80.3971	86.0877	49.08	73.9403	163.63	83.5257	54.667	64.3899	184.403	256.475	134.09	140.522	78.6736	205.732	43.3603
ENSG00000247095	MIR210HG	MIR210 host gene [Source:HGNC Symbol;Acc:HGNC:39524]		67.9101	23.1322	123.303	3.63781	1.0021	12.4477	0.000120584	0.0102514	lncRNA	11	565660	568457	-1	14.2859	10.9059	18.7737	16.0906	19.2232	11.4204	2.29909	18.2984	17.4095	30.5956	11.7619	10.6574	12.7374	18.9598	101.06	16.9214	12.3521	48.8952	17.6108	64.0653	11.452	153.317	17.7179	19.3899	16.7038	499.788	12.6777	12.9414	105.06	41.163	18.6332	2.28591	10.8401
ENSG00000267737		novel transcript		13.4275	1.72241	27.9014	4.24685	1.15816	18.9858	0.000120865	0.0102514	lncRNA	17	78315729	78347798	1	0	3.11597	0	0.595948	0.818011	1.63149	0.766363	0	12.1866	1.91222	2.35239	3.99654	0.749257	1.57998	0	0	1.07409	3.09463	2.29706	0	0	18.4851	4.16891	5.96612	16.7038	6.13237	6.91509	22.3533	70.5009	109.295	6.21108	16.0014	3.09717
ENSG00000188822	CNR2	cannabinoid receptor 2 [Source:HGNC Symbol;Acc:HGNC:2160]	1269	357.096	328.615	392.638	-2.01167	0.821401	-4.03249	0.000128034	0.0107659	protein_coding	1	23870515	23913362	-1	420.958	116.849	352.169	291.418	372.604	83.2061	279.722	406.521	137.535	303.087	312.083	293.079	591.913	480.314	203.121	588.404	528.991	194.343	327.714	452.461	164.418	222.908	503.396	313.221	1223.93	165.574	170.572	582.363	320.71	102.198	672.866	267.451	1279.13
ENSG00000158473	CD1D	CD1d molecule [Source:HGNC Symbol;Acc:HGNC:1637]	912	864.492	1130.86	535.924	-2.10479	0.901058	-4.30134	0.000131746	0.0110072	protein_coding	1	158178030	158186427	1	396.196	747.834	576.806	747.914	825.373	931.582	1199.36	1452.99	2474.76	588.009	1757.23	887.231	522.981	868.199	1990.18	1058.36	1556.9	3349.01	294.789	849.866	672.397	874.235	268.895	335.594	446.447	823.27	703.035	528.244	38.7064	614.606	490.675	1721.29	495.547
ENSG00000233967		novel transcript		47.6723	60.2761	32.1279	-2.67307	1.106	-6.37786	0.000132596	0.0110072	lncRNA	6	80441295	80466674	1	60.0008	84.1313	51.1422	98.3313	105.114	55.4707	94.2626	53.4116	18.2799	12.4294	84.6859	69.9394	49.451	43.4495	39.0232	100.759	70.8901	15.4732	75.803	33.0337	50.716	36.9701	0	96.9495	22.7779	27.5957	61.0833	37.6477	2.76474	9.93589	66.2515	20.5732	71.2348
ENSG00000136379	ABHD17C	abhydrolase domain containing 17C, depalmitoylase [Source:HGNC Symbol;Acc:HGNC:26925]	58489	271.515	135.68	439.532	2.61663	0.7586	6.13315	0.000132539	0.0110072	protein_coding	15	80679684	80755621	1	100.001	123.081	150.19	116.806	116.566	68.5226	141.777	67.259	494.429	305	79.9811	72.6037	100.4	131.928	152.09	46.9185	67.1308	114.501	143.183	112.114	144.786	540.416	190.728	164.068	74.4078	398.604	203.995	163.532	521.154	430.082	74.5329	358.888	27.8745
ENSG00000143126	CELSR2	cadherin EGF LAG seven-pass G-type receptor 2 [Source:HGNC Symbol;Acc:HGNC:3231]	1952	180.38	185.664	173.975	-1.67173	0.637783	-3.18595	0.000136867	0.0112658	protein_coding	1	109249539	109275751	1	292.385	177.61	231.111	197.259	227.816	227.593	259.797	176.06	60.0627	71.7084	235.239	171.851	257.744	308.096	92.0547	189.212	226.097	60.0358	189.89	158.161	89.1621	167.453	120.898	159.594	148.816	228.431	218.978	276.475	218.415	133.425	347.82	336.029	215.253
ENSG00000149527	PLCH2	phospholipase C eta 2 [Source:HGNC Symbol;Acc:HGNC:29037]	9651	407.497	264.368	584.729	-2.19331	0.950709	-4.57354	0.000139668	0.0114481	protein_coding	1	2425980	2505532	1	185.717	285.891	314.621	305.721	379.966	131.335	432.995	193.864	98.3635	87.0061	458.715	295.078	150.601	269.387	139.083	673.011	278.727	212.911	428.019	27.0275	203.682	201.161	284.528	1181.29	1097.9	401.67	501.344	1087.08	250.209	249.817	1165.61	530.331	1728.22
ENSG00000259673	IQCH-AS1	IQCH antisense RNA 1 [Source:HGNC Symbol;Acc:HGNC:44104]	100506686	112.435	129.176	91.8135	-2.35698	1.01379	-5.12296	0.000140551	0.0114723	lncRNA	15	67290636	67521844	-1	97.1442	137.882	118.469	225.268	153.786	154.176	188.525	260.629	56.5808	23.9028	257.978	89.256	69.6809	176.168	18.0107	229.208	193.874	32.8031	68.1461	45.0459	116.156	58.7173	21.8868	105.899	179.186	58.2575	104.879	122.355	17.9708	24.13	157.347	164.586	264.808
ENSG00000262370		novel transcript		212.014	281.339	126.47	-1.681	0.650156	-3.20651	0.000142225	0.0115605	lncRNA	16	3076911	3087111	-1	90.4774	263.3	270.6	348.033	249.084	400.531	257.498	329.371	147.11	241.896	367.756	242.456	195.556	143.778	277.165	303.047	292.69	194.962	166.154	207.211	919.433	93.5127	86.5048	234.17	147.297	159.442	191.318	107.061	91.2365	129.167	113.87	285.739	52.6518
ENSG00000248719		putative novel transript		25.7452	3.9885	52.6444	3.69172	1.03611	12.9217	0.000144479	0.0116467	lncRNA	4	80182637	80197410	-1	2.85718	0	0.647369	5.95948	4.09005	4.89447	9.19636	10.3856	6.96379	2.86833	0.784129	0	0	7.10991	4.00238	7.69155	3.75932	4.95141	4.59412	3.00306	0	4.34943	28.1401	4.47459	24.2964	9.19855	6.91509	12.9414	181.091	245.558	26.9147	18.2873	13.9373
ENSG00000102921	N4BP1	NEDD4 binding protein 1 [Source:HGNC Symbol;Acc:HGNC:29850]	9683	1976.72	1414.5	2672.64	1.39465	0.42483	2.62925	0.000146458	0.0117576	protein_coding	16	48538726	48620148	-1	1019.06	1022.82	1081.11	1367.7	1138.26	1289.69	2214.02	1106.31	888.753	1619.65	1610.6	1866.38	1448.31	1097.3	2111.26	1481.39	1293.74	2221.33	1623.26	1046.07	1157.47	2444.38	3734.3	1154.44	1421.34	3084.58	1408.37	1775.32	5022.15	2719.6	1997.9	1913.31	1418.5
ENSG00000171843	MLLT3	MLLT3 super elongation complex subunit [Source:HGNC Symbol;Acc:HGNC:7136]	4300	664.066	577.895	771.049	1.00919	0.306686	2.01278	0.000151285	0.0120954	protein_coding	9	20341669	20622499	-1	755.248	556.98	686.211	432.658	510.03	507.394	609.259	514.334	914.868	697.005	459.499	619.463	490.014	366.556	500.297	774.539	469.379	573.126	933.372	375.382	390.186	1090.62	753.53	887.461	438.854	587.174	706.492	674.129	583.361	899.908	712.203	406.892	625.628
ENSG00000131781	FMO5	flavin containing dimethylaniline monoxygenase 5 [Source:HGNC Symbol;Acc:HGNC:3773]	2330	160.94	186.119	129.912	-1.77646	0.708199	-3.42584	0.000153752	0.0121741	protein_coding	1	147175351	147243050	-1	132.383	225.129	223.342	190.107	229.861	199.042	159.403	354.593	24.3733	95.6112	288.559	220.476	148.353	237.787	99.0589	238.438	283.023	155.35	89.5853	147.15	166.872	121.784	81.2937	105.899	220.186	27.5957	202.843	127.061	77.4128	65.293	213.247	290.311	212.156
ENSG00000251364		novel transcript, antisense to OLFML1	100506258	207.978	218.394	195.24	-1.9107	0.788057	-3.75992	0.000156616	0.012247	lncRNA	11	7418826	7513644	-1	160.955	227.466	207.806	347.437	298.165	136.23	288.152	238.374	65.2855	128.119	421.077	295.744	237.514	253.587	74.044	285.357	288.931	96.5525	214.392	47.0479	274.03	160.929	92.7582	96.9495	463.151	156.375	145.217	360.006	183.855	116.392	370.594	240.021	528.067
ENSG00000185338	SOCS1	suppressor of cytokine signaling 1 [Source:HGNC Symbol;Acc:HGNC:19383]	8651	279.957	85.1383	520.955	2.25671	0.674317	4.77901	0.000156948	0.012247	protein_coding	16	11254408	11256204	-1	161.907	78.6783	77.6843	28.0095	37.2195	44.0503	206.152	33.6295	52.2284	43.025	40.7747	79.9307	123.627	25.2797	112.067	195.365	23.093	106.455	173.045	63.0642	82.6181	897.069	453.369	283.391	299.15	444.597	119.862	380.007	685.656	1057.46	356.102	267.451	445.992
ENSG00000138755	CXCL9	C-X-C motif chemokine ligand 9 [Source:HGNC Symbol;Acc:HGNC:7098]	4283	11.2559	4.59945	19.4844	3.04383	0.889709	8.24676	0.000159322	0.0123276	protein_coding	4	76001275	76007509	-1	3.80958	21.0328	1.29474	1.1919	4.49906	2.44724	9.19636	4.94551	0	3.82445	8.62542	2.66436	3.74628	4.73994	0	2.30747	3.75932	12.3785	6.12549	0	0	11.9609	2.08445	14.9153	10.6297	15.3309	24.2028	25.8828	26.2651	8.51648	18.6332	25.145	7.74292
ENSG00000161010	MRNIP	MRN complex interacting protein [Source:HGNC Symbol;Acc:HGNC:30817]	51149	741.435	610.005	904.524	-1.43981	0.547429	-2.71284	0.000159877	0.0123276	protein_coding	5	179835133	179862173	-1	615.246	507.125	528.901	887.366	679.767	491.895	652.941	777.435	215.007	267.711	673.567	580.83	515.489	557.733	240.143	1922.12	820.07	366.404	650.068	316.322	543.97	930.777	744.15	794.986	1254.3	789.542	753.745	941.193	1000.84	608.928	743.259	1136.1	1672.47
ENSG00000275183	LENG9	leukocyte receptor cluster member 9 [Source:HGNC Symbol;Acc:HGNC:16306]	94059	58.6112	20.7439	105.442	2.31289	0.693549	4.96877	0.000159608	0.0123276	protein_coding	19	54461732	54463778	-1	7.61915	24.1488	25.2474	25.6257	28.6304	37.5243	32.1872	41.0478	12.1866	1.91222	32.9334	17.3183	17.2329	18.1698	3.00178	15.3831	55.3158	6.18926	6.12549	9.00918	18.814	82.6391	137.574	65.6274	107.815	41.3935	49.5582	135.296	85.707	235.623	132.503	100.58	145.567
ENSG00000136048	DRAM1	DNA damage regulated autophagy modulator 1 [Source:HGNC Symbol;Acc:HGNC:25645]	55332	835.272	422.414	1345.93	2.39132	0.710774	5.24637	0.000161001	0.0123654	protein_coding	12	101877580	102012130	1	239.051	424.551	416.906	376.043	273.216	472.317	482.809	526.697	521.414	629.121	361.483	347.033	255.497	282.817	776.462	448.418	342.636	743.949	220.518	443.452	286.3	818.78	644.096	429.561	238.409	574.909	306.569	367.065	3447.63	2897.02	320.906	749.779	97.5608
ENSG00000122490	SLC66A2	solute carrier family 66 member 2 [Source:HGNC Symbol;Acc:HGNC:26188]	80148	1858.03	1233.98	2630.53	1.30113	0.40345	2.46421	0.000177132	0.0132395	protein_coding	18	79902420	79951657	-1	1024.78	1318.84	1238.42	930.274	877.725	1032.73	898.177	948.55	2645.37	2562.38	953.501	1124.36	676.579	838.18	1837.09	792.23	787.847	1921.77	1256.49	1027.05	1221.28	3114.19	2112.59	2059.8	1794.9	2923.61	2072.22	1636.5	2767.51	4746.52	1890.24	2073.32	1327.14
ENSG00000153162	BMP6	bone morphogenetic protein 6 [Source:HGNC Symbol;Acc:HGNC:1073]	654	92.9451	30.1789	170.57	2.44406	0.735441	5.44171	0.000184081	0.0135653	protein_coding	6	7726099	7881728	1	19.0479	11.6849	14.8895	10.1311	12.2702	49.7605	7.66363	31.6513	38.3008	33.4639	38.4223	17.9844	40.4599	11.8499	17.0101	11.5373	172.392	25.376	42.1128	22.0224	5.72601	129.395	85.4626	67.1189	107.815	157.908	63.3884	77.6484	371.858	255.494	285.709	75.435	69.6863
ENSG00000197632	SERPINB2	serpin family B member 2 [Source:HGNC Symbol;Acc:HGNC:8584]	5055	6698.15	597.432	14240.7	5.13535	1.36812	35.1475	0.000183462	0.0135653	protein_coding	18	63871692	63903888	1	107.62	337.304	1293.44	237.187	152.968	367.901	180.862	279.422	382.138	5300.68	254.842	129.221	73.4272	292.296	712.424	153.062	237.912	246.952	19.9079	1744.78	41.718	4704.99	11964.8	165.56	9.11116	2265.91	224.741	117.649	47845.2	16093.3	300.202	811.498	49.5547
ENSG00000141391	PRELID3A	PRELI domain containing 3A [Source:HGNC Symbol;Acc:HGNC:24639]	10650	76.4231	109.601	35.491	-1.67339	0.655796	-3.18964	0.000187005	0.0136633	protein_coding	18	12407896	12432238	1	207.622	116.07	114.584	144.219	97.3433	101.968	127.216	76.6555	116.643	97.5234	43.9112	103.91	185.816	170.638	79.047	54.61	85.3904	69.3197	48.2383	183.187	77.7101	61.9793	20.8445	46.2375	28.852	24.5295	103.726	43.5302	31.7945	39.7436	18.6332	34.2887	35.6174
ENSG00000158987	RAPGEF6	Rap guanine nucleotide exchange factor 6 [Source:HGNC Symbol;Acc:HGNC:20655]	51735	611.017	509.168	737.301	1.13033	0.351942	2.18909	0.00018865	0.0136974	protein_coding	5	131423921	131635231	-1	543.817	454.932	550.264	459.476	640.093	355.665	561.744	294.753	685.933	490.485	624.951	546.193	343.16	281.237	649.386	816.074	457.026	698.768	530.621	230.235	477.712	411.021	725.39	566.782	525.411	640.832	599.308	781.19	916.512	506.731	784.666	443.467	995.739
ENSG00000130589	HELZ2	helicase with zinc finger 2 [Source:HGNC Symbol;Acc:HGNC:30021]	85441	3648.93	1399.51	6431.03	2.24068	0.679877	4.72621	0.000188877	0.0136974	protein_coding	20	63558086	63574239	-1	562.865	1184.85	1107.65	1153.16	644.592	2748.25	3493.08	843.705	759.923	2189.5	1470.24	2900.15	904.353	570.373	1691.01	1152.96	842.626	1708.24	1139.34	951.97	1370.97	10485.4	3732.21	2183.6	5925.29	5830.35	1240.11	4374.19	14542.5	3741.57	5556.84	1977.31	5289.96
ENSG00000131746	TNS4	tensin 4 [Source:HGNC Symbol;Acc:HGNC:24352]	84951	24.2777	4.18154	49.1337	3.67666	1.05485	12.7875	0.000189586	0.0136979	protein_coding	17	40475828	40501623	-1	0	1.55799	7.12106	1.78784	3.68105	0.815746	3.83181	0	32.2075	11.4733	1.56826	3.33045	0.749257	0.78999	4.00238	5.38409	0.537046	0.618926	1.53137	6.00612	0.818001	89.1633	119.856	2.98306	3.03705	96.5848	10.3726	23.5298	71.8833	72.3901	14.4925	13.7155	17.0344
ENSG00000106258	CYP3A5	cytochrome P450 family 3 subfamily A member 5 [Source:HGNC Symbol;Acc:HGNC:2638]	1577	44.9159	1.87938	98.1441	2.83081	0.872261	7.11472	0.000190339	0.0137016	protein_coding	7	99648194	99679998	-1	0.952394	1.55799	1.29474	0	0	2.44724	2.29909	0	0.870473	9.56112	1.56826	7.99307	0	0.78999	0	0	0	2.4757	7.65687	0	0	86.9885	69.8292	85.0173	151.853	50.592	81.8286	132.943	182.473	119.231	149.066	68.5773	199.767
ENSG00000178860	MSC	musculin [Source:HGNC Symbol;Acc:HGNC:7321]	9242	290.703	15.992	630.407	4.58252	1.25333	23.9593	0.000191991	0.0137697	protein_coding	8	71841549	71844468	-1	0	16.3589	23.9527	8.34327	2.45403	6.52597	8.42999	4.45096	14.798	45.8934	13.3302	13.9879	41.2091	0.78999	9.00535	1.53831	3.75932	44.5627	44.4098	32.0326	0	676.336	431.482	35.7967	25.815	228.431	66.8459	10.5884	2423.3	1460.58	45.5479	68.5773	9.2915
ENSG00000135148	TRAFD1	TRAF-type zinc finger domain containing 1 [Source:HGNC Symbol;Acc:HGNC:24808]	10906	1104.87	1100.41	1110.96	1.00462	0.311695	2.00641	0.000193173	0.0138037	protein_coding	12	112125538	112153604	1	719.057	645.785	639.601	1029.8	1150.53	1040.08	1886.79	1406.01	1243.04	1242.94	1310.28	1138.35	626.379	1163.66	1391.83	1248.34	1225	1509.56	781.766	890.908	818.819	1062.35	1151.66	799.46	1093.34	1208.08	960.046	708.247	814.217	918.36	871.621	804.64	788.229
ENSG00000167525	PROCA1	protein interacting with cyclin A1 [Source:HGNC Symbol;Acc:HGNC:28600]	147011	200.602	189.93	213.934	-1.35622	0.514796	-2.56013	0.000197669	0.0140735	protein_coding	17	28703197	28711854	-1	147.621	99.7111	163.784	246.126	209.411	250.434	232.974	271.509	134.923	75.5328	270.524	141.877	128.872	329.426	106.063	323.045	283.023	68.0819	104.899	111.113	289.572	326.207	292.866	244.611	276.372	118.048	224.741	228.239	201.826	211.493	242.232	256.022	253.968
ENSG00000058453	CROCC	ciliary rootlet coiled-coil, rootletin [Source:HGNC Symbol;Acc:HGNC:21299]	9696	795.062	683.866	933.167	-1.27134	0.481924	-2.41386	0.000200746	0.0142406	protein_coding	1	16740273	16972964	1	545.722	637.217	621.474	607.867	778.337	496.789	630.717	620.168	245.474	446.504	1108.76	744.688	1064.69	758.391	614.365	1007.59	751.328	471.003	921.121	723.737	565.239	1135.2	1039.1	1091.8	1239.12	1024.11	1164.04	1551.79	568.155	638.736	1440.97	598.908	1753
ENSG00000189337	KAZN	kazrin, periplakin interacting protein [Source:HGNC Symbol;Acc:HGNC:29173]	23254	48.6633	61.7976	32.4767	-2.29151	0.99627	-4.89569	0.000212466	0.0150173	protein_coding	1	13892792	15118043	1	24.7622	76.3413	49.2001	119.785	50.3076	146.019	22.2245	70.2263	17.4095	14.3417	39.9906	62.6124	148.353	26.8597	62.0369	67.6857	97.7424	14.2353	16.8451	66.0673	104.704	123.959	12.5067	32.8137	44.0373	53.6582	47.2531	32.9417	40.0888	32.6465	12.4222	18.2873	12.3887
ENSG00000117525	F3	coagulation factor III, tissue factor [Source:HGNC Symbol;Acc:HGNC:3541]	2152	432.096	33.3817	925.135	4.68831	1.28523	25.7823	0.000214637	0.015116	protein_coding	1	94529173	94541759	-1	44.7625	38.9497	119.763	14.3027	8.99812	44.866	9.96272	24.233	63.5446	118.558	0.784129	13.3218	32.218	1.57998	24.0143	5.38409	12.3521	16.711	22.2049	55.0561	29.448	1340.71	501.311	49.2205	0	153.309	9.22013	27.0593	4747.06	3267.49	389.227	162.3	0
ENSG00000162444	RBP7	retinol binding protein 7 [Source:HGNC Symbol;Acc:HGNC:30316]	116362	171.15	225.643	103.951	-2.23591	1.07161	-4.71061	0.000216194	0.0151483	protein_coding	1	9997206	10016021	1	116.192	322.503	227.874	77.4732	254.81	296.116	157.871	226.999	56.5808	196.003	197.6	209.152	324.428	192.758	188.112	343.043	328.672	161.54	61.2549	346.353	453.172	201.161	25.0134	23.8645	13.6667	262.159	122.167	88.2368	38.7064	107.875	62.1108	390.891	34.0688
ENSG00000198814	GK	glycerol kinase [Source:HGNC Symbol;Acc:HGNC:4289]	2710	340.701	237.804	468.004	1.97158	0.613669	3.92199	0.000219642	0.0153027	protein_coding	X	30653359	30731462	1	87.6202	256.289	262.832	320.024	282.623	368.717	560.211	320.964	447.423	121.426	320.709	177.18	88.4123	289.926	123.073	163.83	258.856	112.645	65.8491	65.0663	300.206	222.908	253.261	272.95	194.372	372.541	200.538	189.415	663.538	594.734	209.106	363.46	147.115
ENSG00000150764	DIXDC1	DIX domain containing 1 [Source:HGNC Symbol;Acc:HGNC:23695]	85458	107.033	76.1174	145.288	2.29497	0.706204	4.90742	0.000223997	0.0154151	protein_coding	11	111927144	112022653	1	41.9053	137.882	69.2685	77.4732	77.711	77.4959	66.6736	87.5356	118.384	51.63	46.2636	37.301	41.9584	215.667	33.0196	149.216	58.001	12.3785	104.133	34.0347	60.5321	92.4253	144.87	46.2375	18.2223	121.114	48.4057	40.0007	128.561	113.553	18.6332	38.8605	52.6518
ENSG00000108797	CNTNAP1	contactin associated protein 1 [Source:HGNC Symbol;Acc:HGNC:8011]	8506	128.519	52.1149	223.048	-1.80296	0.720337	-3.48935	0.000224416	0.0154151	protein_coding	17	42682531	42699993	1	40.9529	45.1816	58.9106	64.3623	63.8048	48.9447	105.758	55.3898	3.48189	5.73667	76.8446	35.9688	56.1943	36.3396	53.0315	86.9146	77.8717	15.4732	45.9412	51.052	66.2581	134.832	323.09	308.747	293.076	200.835	123.319	332.947	305.504	225.687	258.795	233.163	337.591
ENSG00000158201	ABHD3	abhydrolase domain containing 3, phospholipase [Source:HGNC Symbol;Acc:HGNC:18718]	171586	758.343	880.805	607.465	-1.17732	0.440959	-2.26157	0.000222067	0.0154151	protein_coding	18	21650901	21704780	-1	939.06	723.685	805.975	914.184	1060.55	876.111	1837.74	699.79	566.678	640.595	1155.02	760.008	658.597	1042	637.379	1187.58	972.591	675.867	620.972	884.901	837.633	524.106	487.762	836.749	888.339	510.52	690.357	751.778	507.33	383.242	964.787	1147.53	771.195
ENSG00000099337	KCNK6	potassium two pore domain channel subfamily K member 6 [Source:HGNC Symbol;Acc:HGNC:6281]	9424	516.516	566.428	455.187	-1.35297	0.529517	-2.55437	0.000223523	0.0154151	protein_coding	19	38319845	38332076	1	150.478	373.138	374.827	632.3	532.525	841.034	631.483	904.04	262.012	326.99	632.008	393.659	469.784	464.514	467.278	872.991	849.07	768.706	461.709	613.625	872.807	335.993	342.893	554.849	406.965	335.747	507.107	514.126	211.503	501.053	587.982	1067.52	288.037
ENSG00000108700	CCL8	C-C motif chemokine ligand 8 [Source:HGNC Symbol;Acc:HGNC:10635]	6355	15.6512	0.932516	33.8399	6.33921	1.64401	80.964	0.000228271	0.015625	protein_coding	17	34319435	34321402	1	0	1.55799	0	0	4.49906	3.26298	2.29909	0	0	0	0.784129	0.666089	0	2.36997	0	0	1.61114	0	1.53137	1.00102	0	27.1839	0	0	3.03705	0	0	10.5884	2.76474	24.13	22.7739	11.4296	0
ENSG00000060069	CTDP1	CTD phosphatase subunit 1 [Source:HGNC Symbol;Acc:HGNC:2498]	9150	1711.29	1036.59	2546.5	1.36359	0.433076	2.57325	0.000230141	0.0156432	protein_coding	18	79679803	79754510	1	845.726	959.72	838.991	805.125	879.77	892.426	941.86	955.473	2604.46	1193.23	864.11	1422.77	728.278	1025.41	986.587	971.443	886.664	1384.54	1263.38	504.514	813.911	4576.68	3611.32	1521.36	1219.38	4179.21	1622.74	2156.51	2828.33	3126.97	1476.17	1664.14	1241.96
ENSG00000115602	IL1RL1	interleukin 1 receptor like 1 [Source:HGNC Symbol;Acc:HGNC:5998]	9173	26.9836	14.4304	42.5094	2.56955	0.788068	5.93625	0.000233838	0.0158354	protein_coding	2	102311502	102352037	1	3.80958	14.0219	3.88422	2.97974	9.81613	23.6566	10.7291	9.39648	30.4666	14.3417	6.27303	7.99307	9.74034	0.78999	78.0464	13.8448	5.37046	21.0435	13.0167	5.0051	18.814	46.7563	16.6756	14.9153	25.815	27.5957	13.8302	21.1768	12.4413	96.5201	22.7739	32.0027	18.583
ENSG00000026103	FAS	Fas cell surface death receptor [Source:HGNC Symbol;Acc:HGNC:11920]	355	568.286	443.59	722.642	1.57008	0.498892	2.96921	0.000234593	0.0158354	protein_coding	10	88990531	89017059	1	190.479	435.457	345.695	418.951	386.101	411.952	892.046	440.151	542.305	381.488	426.566	473.589	191.061	257.537	1031.61	620.708	393.118	411.586	318.526	351.358	395.094	655.676	722.263	289.357	560.337	476.792	331.925	248.24	1701.7	735.256	585.911	701.774	227.642
ENSG00000173137	ADCK5	aarF domain containing kinase 5 [Source:HGNC Symbol;Acc:HGNC:21738]	203054	215.517	214.673	216.723	-1.50925	0.613765	-2.84662	0.000239301	0.0160422	protein_coding	8	144373101	144393242	1	186.669	167.484	193.563	222.884	330.067	212.91	259.031	299.204	103.586	59.2789	273.661	153.201	166.335	301.776	98.0583	429.189	283.56	73.6522	169.217	159.162	365.646	213.122	159.461	386.306	365.965	187.037	258.164	264.71	153.443	144.78	329.187	210.304	357.723
ENSG00000223799	IL10RB-DT	IL10RB divergent transcript [Source:HGNC Symbol;Acc:HGNC:44303]		58.6098	22.512	103.269	1.49408	0.484104	2.81685	0.00024448	0.0163333	lncRNA	21	33263873	33266260	-1	17.1431	14.0219	16.1842	24.4338	27.8124	20.3936	21.4582	17.3093	33.078	29.6395	22.7397	12.6557	16.4837	24.4897	21.0125	53.8409	39.7414	8.66497	9.18824	13.0133	29.448	75.0276	110.476	88.0003	56.1855	82.787	64.5409	92.9428	141.002	119.231	134.573	93.7223	88.2693
ENSG00000118473	SGIP1	SH3GL interacting endocytic adaptor 1 [Source:HGNC Symbol;Acc:HGNC:25412]	84251	32.3772	10.2001	59.8077	2.92593	0.8864	7.59963	0.000250863	0.0166457	protein_coding	1	66533383	66751139	1	7.61915	2.33698	11.6526	16.0906	10.6341	11.4204	15.3273	8.90193	35.6894	11.4733	5.4889	0	16.4837	0.78999	7.00416	4.61493	9.66683	3.09463	14.548	5.0051	16.36	41.3196	22.929	1.49153	24.2964	124.18	14.9827	38.8242	124.413	143.361	47.6182	6.85773	6.19433
ENSG00000163827	LRRC2	leucine rich repeat containing 2 [Source:HGNC Symbol;Acc:HGNC:14676]	79442	42.3436	22.2465	67.2039	1.95982	0.623389	3.89014	0.000253857	0.0167873	protein_coding	3	46515385	46580099	-1	49.5245	11.6849	17.479	26.2217	17.1782	22.0251	9.19636	19.2875	17.4095	10.5172	12.5461	33.9706	32.218	21.3297	15.0089	9.99902	25.2412	22.2813	42.1128	38.0387	13.906	32.6207	90.6737	40.2713	119.964	84.3201	17.2877	14.1179	211.503	41.163	80.744	25.145	18.583
ENSG00000287216		novel transcript, antisense to KIAA0922		22.0046	2.53533	46.0812	3.31022	0.999368	9.91918	0.000255358	0.0168295	lncRNA	4	153633692	153655689	-1	0	2.33698	0	1.78784	0	0	5.36454	6.92372	0	0	9.40954	1.99827	1.49851	5.52993	4.00238	6.9224	1.61114	0	0.765687	1.00102	4.09	33.7081	36.4779	32.8137	82.0005	27.5957	31.1179	55.2951	52.5301	89.423	86.9551	13.7155	63.4919
ENSG00000287878		novel transcript, antisense to CPNE9and MTMR14		82.2139	1.213	182.399	2.15851	0.752176	4.46453	0.000267124	0.0171982	lncRNA	3	9693182	9721399	-1	0	3.11597	1.94211	0.595948	3.68105	0	7.66363	0.494551	0	0	2.35239	0	0.749257	1.57998	0	0	0	0	2.29706	1.00102	0	303.373	248.05	146.17	174.631	150.243	95.6588	161.179	297.21	137.683	169.769	297.168	294.231
ENSG00000138821	SLC39A8	solute carrier family 39 member 8 [Source:HGNC Symbol;Acc:HGNC:20862]	64116	2554.24	1603.25	3730.84	2.22538	0.696165	4.67634	0.000263321	0.0171982	protein_coding	4	102251041	102431258	-1	2037.17	2068.23	1845.65	1315.85	1279.37	1244.01	859.093	1490.08	2758.53	2805.23	740.217	1573.97	1628.88	1298.74	1681	549.177	1131.02	1474.28	2633.2	1528.56	1725.98	1927.88	2100.09	1888.28	721.301	1335.32	1278.14	765.895	5286.19	4739.42	699.781	1078.95	543.553
ENSG00000286511		novel transcript		18.7713	3.47264	37.6887	4.13713	1.18856	17.5954	0.000266605	0.0171982	lncRNA	6	108798929	108837113	1	0	1.55799	1.94211	1.78784	6.95309	1.63149	4.59818	2.47276	4.35237	3.82445	3.13651	0	3.74628	7.10991	4.00238	1.53831	3.75932	0.618926	1.53137	2.00204	16.36	13.0483	3.12668	0	1.51853	10.7316	5.76258	5.88245	212.885	73.8095	10.3518	0	1.54858
ENSG00000173281	PPP1R3B	protein phosphatase 1 regulatory subunit 3B [Source:HGNC Symbol;Acc:HGNC:14942]	79660	742.572	461.354	1090.48	2.39637	0.743401	5.26477	0.000264788	0.0171982	protein_coding	8	9136255	9151574	-1	473.34	238.372	324.979	261.621	198.368	274.091	436.827	265.08	482.242	877.71	255.626	322.387	314.688	110.599	1135.68	212.287	184.207	1182.77	920.355	894.912	322.292	818.78	417.933	258.035	232.335	1824.38	240.876	282.358	1441.81	1811.17	289.85	1053.8	120.79
ENSG00000168913	ENHO	energy homeostasis associated [Source:HGNC Symbol;Acc:HGNC:24838]	375704	19.0281	20.6359	17.0543	-3.68309	1.25629	-12.8446	0.000265828	0.0171982	protein_coding	9	34521043	34522990	-1	9.52394	21.8118	29.779	26.8176	48.2626	26.1039	13.0282	16.8147	23.5028	11.4733	54.889	15.3201	17.9822	20.5397	0	14.614	28.4635	18.5678	20.6735	7.00714	8.18001	19.5724	9.38004	38.7798	7.59264	29.1287	26.5079	18.8239	22.1179	21.2912	4.14072	9.14364	12.3887
ENSG00000287356		novel transcript, antisense to MORN1		27.9188	6.10532	54.9017	2.03641	0.661718	4.10225	0.000269243	0.0172765	lncRNA	1	2315040	2323085	1	0.952394	5.45295	7.12106	4.76758	7.36209	3.26298	5.36454	3.95641	6.96379	5.73667	3.13651	11.3235	7.49257	7.10991	1.00059	23.0747	3.75932	6.80819	7.65687	1.00102	4.908	81.5518	87.5471	22.373	92.6302	65.9229	23.0503	88.2368	100.913	38.3242	41.4072	9.14364	71.2348
ENSG00000120306	CYSTM1	cysteine rich transmembrane module containing 1 [Source:HGNC Symbol;Acc:HGNC:30239]	84418	168.194	117.368	231.124	1.56451	0.504522	2.95776	0.000270112	0.0172765	protein_coding	5	140175156	140282052	1	67.62	157.357	130.769	200.834	67.4859	160.702	129.515	110.285	185.411	143.417	73.7081	73.9359	84.666	82.159	86.0512	131.526	59.0751	94.0768	67.3804	159.162	199.592	213.122	166.756	131.255	98.7043	556.512	142.912	150.591	362.181	110.714	215.317	285.739	68.1377
ENSG00000284719		novel transcript		30.8374	45.2748	13.0139	-2.05423	0.858066	-4.15322	0.000271278	0.0172944	lncRNA	1	39799422	39809450	1	21.9051	66.2144	53.0843	70.9178	31.4934	119.915	44.449	39.5641	15.6685	9.56112	42.343	37.9671	35.9643	30.8096	42.025	64.609	34.908	32.8031	19.9079	45.0459	91.6161	13.0483	5.21113	22.373	15.1853	12.2647	8.06761	11.7649	4.14711	5.67765	10.3518	43.4323	26.3259
ENSG00000227028	SLC8A1-AS1	SLC8A1 antisense RNA 1 [Source:HGNC Symbol;Acc:HGNC:44102]	100128590	28.3572	27.91	28.9286	-2.67705	1.08862	-6.39546	0.000272911	0.0173419	lncRNA	2	39786453	40255209	1	68.5724	30.3807	34.3106	16.6865	70.3489	23.6566	36.0191	37.0914	53.0989	0.956112	28.2286	9.99134	22.4777	51.3494	24.0143	6.9224	16.1114	8.04604	7.65687	14.0143	26.176	30.446	7.29559	35.7967	19.7409	24.5295	14.9827	17.6474	30.4122	31.2271	31.0554	75.435	18.583
ENSG00000138035	PNPT1	polyribonucleotide nucleotidyltransferase 1 [Source:HGNC Symbol;Acc:HGNC:23166]	87178	1081.96	966.711	1224.95	1.27759	0.411848	2.42433	0.000277718	0.0175331	protein_coding	2	55634061	55693863	-1	962.87	1118.63	925.738	1044.7	1010.24	1458.55	1039.19	1017.29	905.292	973.322	915.862	1217.61	717.039	1266.35	698.415	761.464	1148.21	760.66	1030.61	503.513	825.363	1270.03	728.517	1139.53	1110.04	781.877	644.256	525.891	1704.46	983.653	732.907	544.047	1022.07
ENSG00000179598	PLD6	phospholipase D family member 6 [Source:HGNC Symbol;Acc:HGNC:30447]	201164	93.8489	99.6572	86.7425	-1.32093	0.511561	-2.49827	0.000276975	0.0175331	protein_coding	17	17200995	17206333	-1	105.716	95.0372	89.9843	147.795	128.428	79.9431	95.7954	133.034	157.556	27.7272	135.654	57.2837	62.9376	139.038	83.0494	117.681	84.3163	61.2737	81.1628	58.0591	151.33	42.4069	80.2515	108.882	88.0746	101.184	138.302	131.767	100.913	69.5512	113.87	50.29	97.5608
ENSG00000168116	KIAA1586	KIAA1586 [Source:HGNC Symbol;Acc:HGNC:21360]	57691	375.657	340.169	419.712	1.13642	0.368437	2.19835	0.000279789	0.0176068	protein_coding	6	57046532	57055239	1	365.719	366.906	433.09	370.083	401.643	359.744	335.667	511.861	424.791	227.555	337.959	239.792	239.762	391.835	412.245	183.059	344.784	382.496	290.195	170.173	354.194	401.235	293.908	440.002	577.04	289.754	210.91	260.004	501.801	478.342	223.599	150.87	297.328
ENSG00000125430	HS3ST3B1	heparan sulfate-glucosamine 3-sulfotransferase 3B1 [Source:HGNC Symbol;Acc:HGNC:5198]	9953	547.984	281.753	877.336	1.99928	0.635928	3.99802	0.000282992	0.0176679	protein_coding	17	14301081	14349404	1	196.193	278.88	269.306	416.567	471.174	255.328	439.892	278.927	343.837	120.47	432.839	224.472	96.6541	150.888	303.18	622.247	188.503	267.376	148.543	72.0734	339.47	637.191	1368.44	721.901	241.446	659.229	335.382	567.069	1430.75	1670.65	329.187	194.302	193.573
ENSG00000258056		novel transcript, antisense to CD63	105369779	39.0977	39.4307	38.7026	-2.45513	1.09195	-5.48364	0.000293783	0.0178079	lncRNA	12	55729104	55730852	1	12.3811	37.3917	40.7843	38.7366	57.6697	30.1826	112.655	77.6446	9.57521	7.64889	74.4922	19.3166	22.4777	54.5093	18.0107	87.6837	57.464	15.4732	6.12549	11.0112	36.81	30.446	14.5912	44.7459	69.8523	15.3309	57.6258	38.8242	20.7356	11.3553	57.97	121.153	35.6174
ENSG00000224429	LINC00539	long intergenic non-protein coding RNA 539 [Source:HGNC Symbol;Acc:HGNC:43672]		73.754	94.8163	47.7573	-1.74383	0.751793	-3.34923	0.000292878	0.0178079	lncRNA	13	21302862	21348721	-1	45.7149	116.07	76.3896	125.149	85.0731	248.802	112.655	51.9279	34.8189	49.7178	146.632	75.9342	29.221	158.788	86.0512	87.6837	137.484	18.5678	83.4599	41.0418	179.96	58.7173	29.1824	52.2036	51.6299	45.9928	27.6604	67.06	37.324	32.6465	74.5329	73.1491	55.749
ENSG00000101187	SLCO4A1	solute carrier organic anion transporter family member 4A1 [Source:HGNC Symbol;Acc:HGNC:10953]	28231	441.552	116.908	843.107	2.53279	0.788031	5.78688	0.000292886	0.0178079	protein_coding	20	62642503	62685785	1	60.9532	101.269	66.679	133.492	60.1238	89.732	126.45	103.856	239.38	218.95	63.5144	79.2646	65.1853	101.119	111.066	119.988	107.946	151.637	189.89	69.0704	195.502	1104.75	1986.48	184.95	86.5561	1660.34	141.759	220.004	2434.36	853.067	84.8847	230.877	178.087
ENSG00000099625	CBARP	CACN subunit beta associated regulatory protein [Source:HGNC Symbol;Acc:HGNC:28617]	255057	30.4079	2.00738	65.5345	3.2195	0.992261	9.31466	0.000287815	0.0178079	protein_coding	19	1228287	1238027	-1	0	2.33698	9.71054	0.595948	1.22702	1.63149	0	0.989103	0	1.91222	0	2.66436	3.74628	2.36997	3.00178	0	1.07409	0	6.89118	4.00408	0	41.3196	52.1113	20.8814	31.8891	171.706	13.8302	45.8831	235.003	127.747	18.6332	9.14364	24.7773
ENSG00000104814	MAP4K1	mitogen-activated protein kinase kinase kinase kinase 1 [Source:HGNC Symbol;Acc:HGNC:6863]	11184	1653.28	1722.72	1568.73	-1.12544	0.434463	-2.18169	0.00029219	0.0178079	protein_coding	19	38587641	38618882	-1	1824.79	1683.4	1957.64	1879.62	1869.56	1472.42	1771.06	1862.98	928.795	1184.62	2095.19	1781.12	2304.71	2123.49	1413.84	2418.22	1923.7	1437.77	1553.58	1522.55	1168.11	1150.42	1202.73	2447.6	2368.9	1298.53	2041.11	2474.16	725.745	1212.18	2387.12	1792.15	2959.34
ENSG00000237522	NONOP2	non-POU domain containing, octamer-binding pseudogene 2 [Source:HGNC Symbol;Acc:HGNC:42032]		141.055	30.4699	277.851	-2.08112	0.844775	-4.23136	0.000296869	0.0179298	processed_pseudogene	2	60936819	60938049	-1	28.5718	31.1597	38.8422	50.0596	41.7185	30.1826	59.0099	29.6731	1.74095	4.78056	43.9112	27.9757	27.7225	52.1394	10.0059	36.1503	24.7041	8.66497	16.8451	22.0224	53.988	279.451	504.438	177.492	305.224	479.858	171.725	278.828	511.477	366.209	300.202	123.439	312.814
ENSG00000101425	BPI	bactericidal permeability increasing protein [Source:HGNC Symbol;Acc:HGNC:1095]	671	815.273	701.341	955.869	2.88313	0.882178	7.37747	0.000299045	0.0180055	protein_coding	20	38304150	38337505	1	187.622	1068	806.622	2124.55	581.605	1752.22	740.307	360.033	101.845	319.341	588.881	550.856	502.002	112.179	311.185	835.303	773.884	796.558	169.217	908.926	1137.02	46.7563	26.0557	35.7967	6.07411	130.313	125.624	98.8252	190.767	123.489	41.4072	413.75	9.2915
ENSG00000105825	TFPI2	tissue factor pathway inhibitor 2 [Source:HGNC Symbol;Acc:HGNC:11761]	7980	22.3598	3.48459	45.6988	4.50944	1.28335	22.776	0.000301169	0.0180776	protein_coding	7	93885396	93890753	-1	0	0.778993	3.23685	1.1919	2.04503	8.15746	0	3.95641	2.61142	0.956112	0	0	18.7314	2.36997	6.00357	1.53831	1.07409	1.85678	7.65687	11.0112	0	0	28.1401	2.98306	0	36.7942	3.45755	1.17649	135.472	72.3901	4.14072	0	1.54858
ENSG00000136732	GYPC	glycophorin C (Gerbich blood group) [Source:HGNC Symbol;Acc:HGNC:4704]	2995	2691.51	2116.79	3403.49	1.21953	0.394403	2.32871	0.000304969	0.0181382	protein_coding	2	126656133	126696667	1	2507.65	2467.85	2002.96	1377.23	1719.05	1949.63	1124.25	2187.4	3972.84	3478.33	1332.23	2323.32	1707.56	1691.37	1626.97	1992.88	1330.26	2095.68	3303.17	1924.96	2337.03	3255.55	2287.69	3418.59	4786.4	2203.05	3372.26	1642.38	2311.32	4889.88	6295.96	1755.58	1652.34
ENSG00000170476	MZB1	marginal zone B and B1 cell specific protein [Source:HGNC Symbol;Acc:HGNC:30125]	51237	1487.53	1624.71	1319.09	-1.81475	0.879762	-3.51799	0.000312737	0.0185437	protein_coding	5	139387467	139390081	-1	2936.23	1469.96	1505.78	2097.74	2837.27	1138.78	1729.68	2478.69	752.089	386.269	1317.34	1154.33	2369.15	3419.08	958.57	805.306	1728.22	617.069	883.602	1454.48	2079.36	2284.54	234.501	1786.85	2848.76	398.604	2444.49	2548.28	358.034	1102.88	1372.65	1341.83	2575.29
ENSG00000123094	RASSF8	Ras association domain family member 8 [Source:HGNC Symbol;Acc:HGNC:13232]	11228	79.5663	48.6382	117.839	1.98185	0.639988	3.94999	0.000315904	0.0186183	protein_coding	12	25959029	26079892	1	34.2862	35.0547	44.0211	23.242	51.5347	33.4456	64.3745	18.793	90.5292	81.2695	44.6953	30.6401	47.9524	36.3396	32.019	39.9961	77.3347	68.0819	62.7863	24.0245	80.9821	63.0667	158.418	56.6782	19.7409	157.908	29.9654	32.9417	233.621	181.685	33.1257	50.29	18.583
ENSG00000218565		DnaJ (Hsp40) homolog, subfamily C, member 7 (DNAJC7) pseudogene		91.8482	28.4065	170.286	3.27757	0.990031	9.69721	0.00031954	0.0187759	processed_pseudogene	6	139338018	139339580	1	9.52394	17.1379	53.0843	32.1812	28.6304	136.23	0.766363	28.1894	9.57521	17.21	15.6826	5.32871	13.4866	18.1698	66.0393	15.3831	27.3894	11.1407	2.29706	89.0908	0	72.8529	17.7179	89.4918	53.1485	7.66546	36.8805	110.59	250.209	323.626	190.473	292.596	9.2915
ENSG00000075420	FNDC3B	fibronectin type III domain containing 3B [Source:HGNC Symbol;Acc:HGNC:24670]	64778	1548.38	1225.11	1948.59	1.47763	0.485689	2.78491	0.000323537	0.0188969	protein_coding	3	172039578	172401669	1	585.722	1734.82	1329.05	988.677	666.679	1459.37	1640.02	900.578	826.95	2319.53	1321.26	1217.61	1058.7	737.061	1925.14	993.749	935.535	1630.87	1119.43	1344.37	992.235	1083.01	1452.86	1133.56	581.596	1753.86	1194.01	1172.96	2890.54	1193.73	1476.17	2409.35	614.788
ENSG00000250274		novel transcript	100128059	37.0186	0.90837	81.657	6.66919	1.75046	101.771	0.000323405	0.0188969	lncRNA	5	170308701	170312806	-1	0	0	0	0	0	0	6.89727	2.96731	0	0	6.27303	0	0	0.78999	0	0	2.14819	0	0	0	0	64.154	37.5202	7.45765	9.11116	3.06618	0	20.0003	136.855	353.434	53.8293	0	0
ENSG00000198018	ENTPD7	ectonucleoside triphosphate diphosphohydrolase 7 [Source:HGNC Symbol;Acc:HGNC:19745]	57089	473.287	369.647	601.651	1.16674	0.384153	2.24503	0.000325657	0.0189639	protein_coding	10	99659509	99711241	1	298.099	323.282	409.137	408.224	348.472	425.819	413.836	360.528	232.416	533.51	359.131	259.109	459.294	269.387	572.34	213.056	364.117	507.519	300.149	474.483	230.676	477.35	652.434	454.917	323.446	495.189	331.925	390.595	1034.01	559.249	302.272	617.196	286.488
ENSG00000139625	MAP3K12	mitogen-activated protein kinase kinase kinase 12 [Source:HGNC Symbol;Acc:HGNC:6851]	7786	396.07	245.403	582.567	-1.52314	0.671249	-2.87415	0.000340019	0.0196245	protein_coding	12	53479669	53500063	-1	127.621	140.219	201.979	214.541	322.705	236.566	432.229	278.927	89.6588	56.4106	585.744	171.185	149.851	285.187	150.089	720.699	312.024	168.348	162.326	109.111	238.038	517.582	675.363	624.951	586.152	334.214	471.379	948.252	703.627	472.665	888.184	987.513	785.132
ENSG00000271133		novel transcript, antisense to ITGB8		31.3859	7.04705	61.4854	3.53933	1.06619	11.6264	0.000343608	0.0196853	lncRNA	7	20328299	20331747	-1	0	3.89497	14.8895	4.76758	9.40712	3.26298	8.42999	1.97821	26.1142	20.0783	1.56826	2.66436	3.74628	2.36997	9.00535	0	5.90751	10.5217	3.82843	9.00918	6.54401	63.0667	11.4645	10.4407	6.07411	9.19855	4.61006	9.41193	268.18	188.782	20.7036	11.4296	1.54858
ENSG00000224596	ZMIZ1-AS1	ZMIZ1 antisense RNA 1 [Source:HGNC Symbol;Acc:HGNC:27433]		31.7396	9.25177	59.5487	3.35497	1.02018	10.2317	0.000345108	0.0196853	lncRNA	10	78943328	79067895	-1	0	8.56893	3.88422	10.1311	5.31707	7.34171	5.36454	9.39648	53.0989	22.9467	15.6826	10.6574	5.2448	2.36997	0	16.1523	4.83342	0	2.29706	2.00204	8.99801	16.3104	56.2802	8.94918	9.11116	39.8604	5.76258	14.1179	94.0012	109.295	12.4222	18.2873	18.583
ENSG00000268658	LINC00664	long intergenic non-protein coding RNA 664 [Source:HGNC Symbol;Acc:HGNC:44319]	400680	93.0484	138.312	37.1527	-1.94556	0.941002	-3.85188	0.000344766	0.0196853	lncRNA	19	21483374	21503238	1	91.4298	158.915	88.0422	280.691	276.488	222.699	140.244	227.494	85.3064	38.2445	146.632	77.9324	84.666	370.505	45.0268	85.3762	168.096	17.9489	44.4098	76.0775	178.324	65.2414	8.33781	62.6443	68.3337	18.3971	57.6258	45.8831	60.8243	18.4524	16.5629	54.8618	37.166
ENSG00000119943	PYROXD2	pyridine nucleotide-disulphide oxidoreductase domain 2 [Source:HGNC Symbol;Acc:HGNC:23517]	84795	170.761	183.531	155.098	-1.3442	0.55723	-2.5389	0.000346324	0.0196971	protein_coding	10	98383565	98415182	-1	113.335	145.672	218.811	230.036	186.506	200.673	235.273	238.868	120.125	136.724	250.137	163.192	146.854	169.058	141.084	371.502	216.967	123.785	150.84	104.106	190.594	84.8138	99.0115	211.797	350.78	90.4524	145.217	244.71	51.1477	79.4871	271.217	194.302	266.356
ENSG00000149557	FEZ1	fasciculation and elongation protein zeta 1 [Source:HGNC Symbol;Acc:HGNC:3659]	9638;105369550	44.2352	19.2381	75.1611	2.16831	0.704544	4.49496	0.000353293	0.0199769	protein_coding	11	125442881	125592568	-1	10.4763	16.3589	49.8474	9.53516	16.3602	20.3936	31.4209	7.91282	35.6894	33.4639	15.6826	18.6505	5.2448	5.52993	14.0083	13.8448	24.7041	28.4706	29.8618	1.00102	15.542	38.0575	70.8714	37.2883	30.3705	193.17	32.2704	77.6484	116.119	66.7124	60.0404	18.2873	34.0688
ENSG00000023608	SNAPC1	small nuclear RNA activating complex polypeptide 1 [Source:HGNC Symbol;Acc:HGNC:11134]	6617	188.16	138.279	249.944	1.45248	0.483409	2.73677	0.000362097	0.0203333	protein_coding	14	61762420	61796428	1	100.001	130.092	154.074	148.391	160.33	108.494	115.721	135.013	408.252	155.846	127.813	99.2473	62.9376	127.978	133.079	83.8379	145.54	127.499	102.602	66.0673	211.044	215.297	164.672	173.018	104.778	398.604	141.759	200.003	442.359	176.007	149.066	123.439	140.921
ENSG00000125726	CD70	CD70 molecule [Source:HGNC Symbol;Acc:HGNC:11937]	970	36.1182	6.01789	73.349	2.77574	0.881365	6.84826	0.000362723	0.0203333	protein_coding	19	6583183	6604103	-1	1.90479	3.11597	5.82632	2.38379	4.90806	4.89447	6.89727	6.42917	11.3162	4.78056	3.13651	0	0.749257	0	10.0059	18.4597	2.68523	10.5217	16.0794	9.00918	3.272	28.2713	94.8426	37.2883	16.7038	124.18	10.3726	95.2957	197.679	79.4871	53.8293	34.2887	51.1033
ENSG00000183742	MACC1	MET transcriptional regulator MACC1 [Source:HGNC Symbol;Acc:HGNC:30215]	346389	146.698	93.2152	212.902	1.47941	0.493273	2.78835	0.000365942	0.0203385	protein_coding	7	20134655	20217404	-1	98.0966	120.744	106.816	89.9881	117.794	92.1793	57.4772	126.605	128.83	135.768	94.8796	61.9463	109.392	103.489	47.028	85.3762	78.4088	60.6548	93.4138	97.0989	51.534	204.423	84.4204	159.594	218.668	141.044	112.947	147.061	583.361	184.524	66.2515	91.4364	219.899
ENSG00000188747	NOXA1	NADPH oxidase activator 1 [Source:HGNC Symbol;Acc:HGNC:10668]	10811	204.32	259.851	135.893	-1.3285	0.557967	-2.51141	0.000364968	0.0203385	protein_coding	9	137423350	137434406	1	321.909	210.328	201.332	286.055	333.748	175.385	128.749	379.816	296.831	101.348	203.089	253.78	611.394	387.095	246.146	179.982	201.392	137.402	198.313	299.305	303.478	101.124	95.8849	104.407	151.853	183.971	267.384	212.945	80.1775	124.908	196.684	121.153	193.573
ENSG00000166793	YPEL4	yippee like 4 [Source:HGNC Symbol;Acc:HGNC:18328]	219539	299.43	152.587	480.971	2.11374	0.685921	4.3281	0.000365751	0.0203385	protein_coding	11	57645087	57649944	-1	120.002	169.042	119.116	73.8975	115.339	296.116	69.739	242.33	352.542	160.627	117.619	147.206	102.648	74.2591	160.095	45.3802	110.632	215.386	245.02	93.0948	174.234	154.405	309.541	419.12	2156.31	412.402	255.859	180.003	577.831	654.349	211.177	66.2914	128.532
ENSG00000163814	CDCP1	CUB domain containing protein 1 [Source:HGNC Symbol;Acc:HGNC:24357]	64866	113.63	57.5088	183.035	2.18997	0.710353	4.56296	0.000373049	0.0204422	protein_coding	3	45082277	45146422	-1	55.2388	79.4573	56.9685	39.3325	67.8949	39.9715	82.7672	60.8298	77.4721	141.505	62.7303	38.6332	41.9584	64.7792	30.0178	18.4597	31.6857	116.358	53.5981	30.0306	17.996	55.4552	150.081	73.085	22.7779	380.207	125.624	107.061	121.649	188.782	70.3922	160.014	13.9373
ENSG00000111817	DSE	dermatan sulfate epimerase [Source:HGNC Symbol;Acc:HGNC:21144]	29940	1958.47	825.178	3359.87	2.56533	0.813488	5.91891	0.000370527	0.0204422	protein_coding	6	116254173	116444861	1	341.909	408.193	391.011	348.629	552.157	672.175	1167.94	712.154	708.565	1118.65	611.62	562.179	464.539	353.126	2645.57	343.812	764.217	2468.9	1516.06	837.853	339.47	2640.1	1823.9	343.052	488.966	2431.48	594.698	557.657	5411.98	6218.45	714.274	1863.02	740.223
ENSG00000106624	AEBP1	AE binding protein 1 [Source:HGNC Symbol;Acc:HGNC:303]	165	3596.52	5458.4	1298.9	-1.80238	0.914059	-3.48795	0.000369946	0.0204422	protein_coding	7	44104345	44114562	1	8682.97	4095.17	4324.43	5659.71	7383.36	2883.66	2361.16	5575.57	3776.11	1473.37	3453.3	5116.23	14443.4	10920	8163.85	1448.32	3844.18	4450.7	4202.09	7671.82	4696.96	723.092	1262.14	875.529	1913.34	435.398	3930.08	1748.27	852.923	831.776	2432.67	475.469	2510.25
ENSG00000126016	AMOT	angiomotin [Source:HGNC Symbol;Acc:HGNC:17810]	154796	129.922	176.663	72.2452	-1.6877	0.783139	-3.22142	0.000372976	0.0204422	protein_coding	X	112774503	112840889	-1	190.479	152.683	170.258	234.803	298.983	228.409	203.853	204.744	179.318	68.84	204.658	83.2612	150.601	395.785	33.0196	129.987	322.765	84.7929	72.7402	155.158	144.786	70.6782	56.2802	73.085	89.5931	70.5222	102.574	176.474	78.7952	28.3883	105.588	59.4337	140.921
ENSG00000111752	PHC1	polyhomeotic homolog 1 [Source:HGNC Symbol;Acc:HGNC:3182]	1911	320.845	371.054	259.046	-1.21783	0.497884	-2.32597	0.000372679	0.0204422	protein_coding	12	8913896	8941467	1	611.437	329.514	330.158	359.356	443.771	290.406	352.527	337.284	116.643	268.667	462.636	325.718	659.346	507.174	310.184	421.497	361.969	248.808	379.781	409.417	265.85	253.354	161.545	219.255	379.632	182.438	295.044	469.42	232.238	127.747	478.253	228.591	461.478
ENSG00000182389	CACNB4	calcium voltage-gated channel auxiliary subunit beta 4 [Source:HGNC Symbol;Acc:HGNC:1404]	785	62.9955	74.7091	48.5595	-1.62548	0.710021	-3.08544	0.000374752	0.020478	protein_coding	2	151832771	152099167	-1	45.7149	89.5842	82.8633	148.987	50.3076	172.938	70.5054	80.1173	26.1142	38.2445	115.267	45.2941	68.9316	69.5191	38.0226	67.6857	93.4461	31.5652	45.9412	52.053	135.788	70.6782	11.4645	80.5427	34.9261	82.787	91.0487	62.354	52.5301	44.0018	53.8293	54.8618	46.4575
ENSG00000184454	NCMAP	non-compact myelin associated protein [Source:HGNC Symbol;Acc:HGNC:29332]	400746	13.7162	3.59843	26.2286	3.47682	1.06702	11.1334	0.000381036	0.020572	protein_coding	1	24556087	24609328	1	0.952394	2.33698	3.23685	0	0.818011	0	3.06545	1.97821	4.35237	4.78056	3.13651	7.99307	5.2448	0	2.00119	1.53831	1.07409	0.618926	21.4392	2.00204	8.99801	66.3288	51.0691	1.49153	9.11116	9.19855	16.1352	0	40.0888	22.7106	4.14072	9.14364	1.54858
ENSG00000174151	CYB561D1	cytochrome b561 family member D1 [Source:HGNC Symbol;Acc:HGNC:26804]	284613	615.776	762.845	434.515	-1.10287	0.439739	-2.14782	0.000382798	0.020572	protein_coding	1	109494052	109502932	1	738.105	678.503	571.627	774.732	673.632	693.384	869.056	738.365	346.448	503.871	957.421	754.013	1410.1	538.773	754.449	1212.96	578.399	519.898	700.603	1121.14	884.259	251.179	539.874	369.9	607.411	413.935	533.615	541.186	340.063	262.591	782.595	729.205	422.763
ENSG00000109320	NFKB1	nuclear factor kappa B subunit 1 [Source:HGNC Symbol;Acc:HGNC:7794]	4790	6388.53	3254.44	10266.7	2.14345	0.697215	4.41817	0.000382611	0.020572	protein_coding	4	102501331	102617302	1	3617.19	2040.96	2101.36	1686.53	2400.86	2084.23	2572.68	1865.94	2560.06	5683.13	2257.51	3546.26	6931.38	1858.06	4557.71	2065.95	2197.59	4385.71	6184.45	6170.29	1575.47	13043.9	10930.9	2374.52	1881.46	15024.3	2574.72	2954.17	25355.5	16651.1	3258.74	3671.17	2679.05
ENSG00000258926		novel transcript, antisense to PRKCH		218.053	0.787239	486.764	2.26636	0.868435	4.81106	0.000381606	0.020572	lncRNA	14	61535385	61545484	-1	1.90479	0	0.647369	0	0	3.26298	1.53273	0	0	2.86833	0.784129	1.99827	0	0	0	0	0	0	1.53137	2.00204	0	454.515	809.81	542.917	419.114	481.391	250.096	1063.55	606.861	569.185	1004.12	438.895	648.856
ENSG00000268230		novel transcript		33.5043	8.25983	64.7367	-4.4866	2.25611	-22.4182	0.000384108	0.0205856	lncRNA	19	58346854	58362751	-1	3.80958	8.56893	7.12106	15.4946	10.2251	7.34171	7.66363	6.42917	8.70473	1.91222	14.8984	4.66262	5.2448	11.0599	7.00416	22.3055	13.9632	0	9.95393	3.00306	4.09	25.0092	96.9271	40.2713	101.741	58.2575	26.5079	144.708	110.59	35.4853	97.3068	38.8605	150.213
ENSG00000235706	DICER1-AS1	DICER1 antisense RNA 1 [Source:HGNC Symbol;Acc:HGNC:43017]	400242	88.985	106.618	67.267	-1.25077	0.497509	-2.37968	0.000391062	0.0209009	lncRNA	14	95157645	95181475	1	87.6202	85.6893	73.8001	131.108	123.929	122.362	83.5336	109.79	121.866	69.7961	167.804	106.574	74.9257	139.038	68.0405	159.984	98.8165	60.6548	80.3971	94.0959	179.142	80.4644	61.4914	125.289	59.2226	44.4597	78.3711	43.5302	40.0888	56.7765	41.4072	93.7223	147.115
ENSG00000267199		novel transcript, antisense SPIRE1		28.9132	42.3509	12.3317	-2.39878	1.15149	-5.27358	0.000394384	0.0209292	lncRNA	18	12438890	12448205	1	50.4769	40.5077	27.1895	89.9881	45.3996	61.1809	46.7481	47.9715	60.9331	13.3856	24.308	36.6349	68.1824	96.3788	0	12.3065	63.3715	18.5678	16.0794	37.0377	32.72	16.3104	7.29559	7.45765	3.03705	24.5295	8.06761	34.1182	2.76474	4.25824	8.28143	29.7168	3.09717
ENSG00000011422	PLAUR	plasminogen activator, urokinase receptor [Source:HGNC Symbol;Acc:HGNC:9053]	5329	5766.33	2036.14	10380.2	2.44002	0.783884	5.42649	0.00039481	0.0209292	protein_coding	19	43646095	43670547	-1	1674.31	2641.57	5731.81	841.478	524.345	2752.33	900.476	601.869	1963.79	4706.94	745.706	1501.37	2647.87	584.593	3501.08	800.691	890.423	1346.78	1216.68	6028.14	1156.65	9315.39	5717.66	2376.01	1401.6	15309.5	2359.2	6863.65	14402.9	21254.3	10707.9	14764.7	572.976
ENSG00000245648	KLRK1-AS1	KLRK1 antisense RNA 1 [Source:HGNC Symbol;Acc:HGNC:54868]	101928100	156.898	6.33337	343.119	2.18869	0.72829	4.55892	0.000396563	0.0209652	lncRNA	12	10363638	10398506	1	8.57154	4.67396	16.8316	2.38379	9.40712	8.15746	6.89727	4.45096	10.4457	5.73667	21.1715	7.99307	1.49851	0.78999	6.00357	0	0	4.33248	3.82843	9.00918	0.818001	107.648	509.649	478.781	390.262	613.237	289.281	401.183	334.534	246.978	890.254	317.742	542.004
ENSG00000168334	XIRP1	xin actin binding repeat containing 1 [Source:HGNC Symbol;Acc:HGNC:14301]	165904	15.9893	1.90278	33.4093	4.24548	1.26339	18.9678	0.000397876	0.0209777	protein_coding	3	39183210	39192596	-1	9.52394	0.778993	0.647369	0	0.409005	0	0	0	0	1.91222	1.56826	3.33045	0	0	8.00476	0	0	3.71356	3.06275	7.00714	0	45.669	25.0134	2.98306	3.03705	36.7942	9.22013	7.05894	71.8833	68.1318	4.14072	6.85773	0
ENSG00000128596	CCDC136	coiled-coil domain containing 136 [Source:HGNC Symbol;Acc:HGNC:22225]	64753	139.926	151.623	125.575	-1.63416	0.757602	-3.10407	0.000400458	0.021026	protein_coding	7	128790757	128822132	1	142.859	128.534	153.427	182.956	183.643	164.781	191.591	184.962	17.4095	84.1378	236.023	137.214	245.756	257.537	57.0339	241.515	153.595	82.3172	74.2716	167.17	97.3421	89.1633	86.5048	80.5427	173.112	105.783	178.64	220.004	417.476	58.1959	194.614	109.724	130.081
ENSG00000086065	CHMP5	charged multivesicular body protein 5 [Source:HGNC Symbol;Acc:HGNC:26942]	51510	718.915	707.449	733.494	1.03795	0.347071	2.0533	0.000400947	0.021026	protein_coding	9	33264879	33282070	1	460.959	544.516	475.816	603.695	876.907	1036	1302.05	788.315	1119.43	603.306	750.411	580.164	385.118	687.292	605.36	931.447	764.217	603.453	428.785	467.476	841.723	852.488	420.017	516.07	756.227	673.027	485.209	503.538	709.156	525.183	656.304	646.913	514.13
ENSG00000215039	CD27-AS1	CD27 antisense RNA 1 [Source:HGNC Symbol;Acc:HGNC:43896]	678655	216.733	269.269	151.947	-1.44716	0.640778	-2.7267	0.000404597	0.0211605	lncRNA	12	6439001	6451567	-1	278.099	186.179	259.595	340.882	300.619	391.558	528.024	323.437	216.748	107.084	297.185	190.502	206.795	374.455	154.092	389.193	435.008	107.074	161.56	161.164	245.4	123.959	71.9137	313.221	247.52	85.8531	183.25	164.709	143.767	86.5842	209.106	228.591	311.265
ENSG00000167543	TP53I13	tumor protein p53 inducible protein 13 [Source:HGNC Symbol;Acc:HGNC:25102]	90313	1740.51	1890.69	1556.43	-1.07598	0.432241	-2.10816	0.000406731	0.0212153	protein_coding	17	29566052	29573157	1	3485.76	1755.07	2177.1	1748.51	1838.89	1258.7	1346.5	1301.66	2443.42	1411.22	1262.45	2224.74	3132.64	1954.44	1803.07	1185.27	1256.69	1833.88	2719.72	2008.05	1556.66	1136.29	1748.86	1836.07	2406.87	1891.84	3044.95	1801.21	641.42	1251.92	1962.7	1259.54	1845.91
ENSG00000255521		novel transcript	100507144	14.4317	2.85592	28.7414	4.07764	1.21716	16.8847	0.000411245	0.0213173	lncRNA	11	35132655	35138032	-1	0	3.11597	7.76843	3.57569	2.45403	4.07873	3.83181	2.47276	0	0.956112	8.62542	6.66089	0	2.36997	0	0	3.75932	0	2.29706	8.00816	0	2.17471	11.4645	10.4407	1.51853	0	12.6777	3.52947	102.295	119.231	26.9147	0	12.3887
ENSG00000172530	BANP	BTG3 associated nuclear protein [Source:HGNC Symbol;Acc:HGNC:13450]	54971	782.851	376.583	1285.57	1.31927	0.444728	2.4954	0.000411964	0.0213173	protein_coding	16	87949244	88077318	1	325.719	296.017	340.516	376.639	331.703	309.983	428.397	399.103	545.787	420.689	409.315	427.629	334.169	386.305	348.207	462.262	426.415	341.028	320.823	332.339	345.196	1098.23	1704.04	502.646	797.227	1810.58	461.006	875.309	2926.48	1365.48	964.787	660.628	1097.95
ENSG00000117298	ECE1	endothelin converting enzyme 1 [Source:HGNC Symbol;Acc:HGNC:3146]	1889	3045.88	1734.98	4668.12	1.4653	0.491585	2.76121	0.00042306	0.0213429	protein_coding	1	21217247	21345572	-1	888.583	1374.14	1272.73	1168.65	925.988	1328.85	2007.1	1397.11	2177.05	2804.28	1525.91	2204.09	1774.99	1019.88	2434.45	1965.19	1762.59	2655.19	2160.77	2054.09	1532.93	5861.94	5892.75	1630.24	2277.79	6491.11	2015.75	2668.28	7956.93	5943.08	2784.63	3431.15	2789
ENSG00000157445	CACNA2D3	calcium voltage-gated channel auxiliary subunit alpha2delta 3 [Source:HGNC Symbol;Acc:HGNC:15460]	55799	92.1016	121.833	55.4033	-1.99113	1.04306	-3.97549	0.000422294	0.0213429	protein_coding	3	54122547	55074557	1	27.6194	129.313	160.548	171.037	139.471	106.047	106.524	311.567	77.4721	33.4639	215.635	81.929	77.9227	188.808	65.0387	126.911	264.227	102.123	38.2843	38.0387	96.5241	44.5816	9.38004	73.085	13.6667	27.5957	101.421	51.7656	208.738	59.6154	57.97	75.435	12.3887
ENSG00000251432	LINC02615	long intergenic non-protein coding RNA 2615 [Source:HGNC Symbol;Acc:HGNC:53402]	100507487	62.6868	75.1666	47.316	-1.41551	0.598008	-2.66753	0.000423719	0.0213429	lncRNA	4	128292751	128519398	1	66.6676	94.2582	77.0369	81.6448	88.3451	101.152	49.0472	78.1391	56.5808	87.0061	65.0827	99.9134	65.9346	52.1394	20.0119	97.6827	69.279	32.1842	122.51	83.0846	90.7981	63.0667	12.5067	89.4918	78.9634	68.9891	40.3381	77.6484	20.7356	38.3242	45.5479	52.5759	75.8806
ENSG00000176788	BASP1	brain abundant membrane attached signal protein 1 [Source:HGNC Symbol;Acc:HGNC:957]	10409	2991.28	1301.4	5081.49	1.99981	0.659824	3.99946	0.000415899	0.0213429	protein_coding	5	17065598	17276843	1	754.296	1355.45	2100.71	1533.97	888.359	1186.09	1213.92	1245.28	990.599	2185.67	991.923	869.247	969.538	1237.91	1961.17	1433.71	1138.54	2236.8	744.247	1114.13	1177.92	4224.38	3332	794.986	1105.49	7700.72	1875.14	1631.79	13021.9	5755.72	1455.46	3673.46	775.84
ENSG00000228672	PROB1	proline rich basic protein 1 [Source:HGNC Symbol;Acc:HGNC:41906]	389333	94.0644	98.6622	88.4575	-1.27122	0.52248	-2.41365	0.000420724	0.0213429	protein_coding	5	139390592	139395104	-1	184.764	72.4464	92.5738	86.4124	97.7523	137.861	82.0008	72.6991	100.104	109.953	45.4795	126.557	98.1527	110.599	116.069	53.0717	105.261	96.5525	50.5353	165.168	67.8941	126.133	63.5758	110.373	159.445	55.1913	227.046	76.4719	67.7362	69.5512	86.9551	45.7182	97.5608
ENSG00000242574	HLA-DMB	major histocompatibility complex, class II, DM beta [Source:HGNC Symbol;Acc:HGNC:4935]	3109	4115.01	4529.04	3606.55	-1.35114	0.602335	-2.55114	0.000423312	0.0213429	protein_coding	6	32934629	32941028	-1	6332.47	4600.73	6315.73	4825.98	5503.17	3588.47	4194.3	4642.35	2671.48	1696.14	5661.41	6135.35	4727.06	5679.24	3970.36	6627.04	6812.97	3714.18	2601.8	2097.14	2712.49	3610.02	1407.01	2975.6	6959.41	4930.42	4131.77	4342.43	2090.15	2034.02	4024.78	3063.12	10500.9
ENSG00000148200	NR6A1	nuclear receptor subfamily 6 group A member 1 [Source:HGNC Symbol;Acc:HGNC:7985]	2649	186.768	244.262	115.853	-1.83815	0.952429	-3.57552	0.000424495	0.0213429	protein_coding	9	124517275	124771311	-1	267.623	373.917	431.148	517.878	164.011	495.158	160.17	199.304	116.643	55.4545	158.394	152.534	289.962	184.858	114.068	133.064	165.947	82.9361	176.874	467.476	422.088	200.074	32.309	229.696	89.5931	36.7942	271.994	136.473	64.9714	52.5183	111.799	365.746	49.5547
ENSG00000231793	DOC2GP	double C2 domain gamma, pseudogene [Source:HGNC Symbol;Acc:HGNC:37962]		59.6122	49.5549	72.0751	-2.21008	1.09216	-4.62699	0.000423428	0.0213429	transcribed_unitary_pseudogene	11	67612651	67616257	-1	22.8575	58.4245	51.1422	42.3123	70.3489	50.5762	85.8326	55.3898	0	8.605	65.8668	96.5829	22.4777	58.4593	6.00357	89.222	75.7235	43.3248	84.2255	14.0143	39.264	68.5035	60.4492	80.5427	177.668	59.7906	117.557	84.7073	27.6474	85.1648	118.01	75.435	125.435
ENSG00000148634	HERC4	HECT and RLD domain containing E3 ubiquitin protein ligase 4 [Source:HGNC Symbol;Acc:HGNC:24521]	26091	1208.54	1343.45	1042.63	-1.2549	0.537448	-2.3865	0.000421462	0.0213429	protein_coding	10	67921899	68075301	-1	971.442	1206.66	1277.26	1795.59	1771.81	1277.46	2200.99	1718.57	683.322	593.745	2151.65	874.575	841.415	1536.53	847.504	2488.22	1662.16	602.215	920.355	894.912	1896.13	827.478	519.029	1448.28	1711.38	916.789	836.726	1102.37	904.071	546.474	1623.16	1136.1	2177.31
ENSG00000242048		uncharacterized LOC644090 [Source:NCBI gene (formerly Entrezgene);Acc:644090]	644090	72.5735	4.99115	156.141	4.10626	1.2229	17.223	0.000425958	0.0213614	lncRNA	7	151806490	151810820	1	0	0.778993	4.53158	2.97974	2.45403	5.71022	3.06545	16.3202	0	0	21.9556	0	3.74628	19.7498	2.00119	5.38409	9.12979	0	0	7.00714	0	206.598	237.628	29.8306	18.2223	58.2575	12.6777	147.061	395.358	447.115	72.4625	118.867	30.9717
ENSG00000234883	MIR155HG	MIR155 host gene [Source:HGNC Symbol;Acc:HGNC:35460]	114614	362.733	132.652	647.405	2.45487	0.795526	5.48265	0.000433393	0.0215679	lncRNA	21	25561909	25575168	1	127.621	93.4792	158.605	91.18	123.111	75.8644	139.478	112.263	343.837	108.041	86.2542	73.9359	200.801	88.4789	212.126	169.214	73.5754	177.013	103.368	103.105	124.336	462.127	252.219	310.238	77.4449	340.346	101.421	127.061	2873.95	914.102	548.645	125.725	210.607
ENSG00000267106	ZNF561-AS1	ZNF561 antisense RNA 1 (head to head) [Source:HGNC Symbol;Acc:HGNC:27613]		62.0558	74.1632	47.128	-1.68108	0.777697	-3.20668	0.000448531	0.0221518	lncRNA	19	9621249	9647203	1	59.0484	78.6783	73.1527	119.785	89.5722	86.4691	77.4027	116.714	63.5446	19.1222	141.927	49.9567	47.9524	105.069	29.0173	84.6071	116.002	9.90282	35.2216	34.0347	120.246	34.7954	29.1824	47.729	94.1487	33.728	70.3035	52.9421	19.3532	24.13	97.3068	45.7182	68.1377
ENSG00000104112	SCG3	secretogranin III [Source:HGNC Symbol;Acc:HGNC:13707]	29106	14.0521	0.230152	31.1514	4.87248	1.47031	29.2929	0.000449941	0.0221653	protein_coding	15	51681492	51721026	1	0	0.778993	0	0	0	0.815746	0	2.47276	0	0	0	0	0	0	0	0	0	0	0.765687	0	0	11.9609	11.4645	1.49153	9.11116	177.839	10.3726	16.4709	182.473	5.67765	18.6332	0	0
ENSG00000113615	SEC24A	SEC24 homolog A, COPII coat complex component [Source:HGNC Symbol;Acc:HGNC:10703]	10802	1114.95	871.431	1416.65	1.45311	0.496441	2.73797	0.000451192	0.0221709	protein_coding	5	134648785	134727909	1	711.438	667.597	681.68	583.433	672.814	601.205	1042.25	734.409	751.219	1578.54	882.145	887.231	1105.9	541.143	1238.74	525.333	745.957	1121.49	911.933	1761.79	553.787	1558.18	1470.58	651.799	615.004	1522.36	594.698	609.422	2431.59	1721.75	631.459	742.921	562.136
ENSG00000138378	STAT4	signal transducer and activator of transcription 4 [Source:HGNC Symbol;Acc:HGNC:11365]	6775	1261.7	718.024	1934.35	2.21536	0.730256	4.64398	0.000453476	0.0222272	protein_coding	2	191029576	191151596	-1	423.815	348.989	439.564	386.77	325.568	204.752	1171	281.4	1371	1470.5	901.748	1043.1	366.387	79.789	486.289	1402.94	247.041	1551.03	2065.06	195.199	316.566	874.235	3131.89	935.19	816.968	2929.74	708.797	1047.08	3367.46	2086.54	1691.48	603.48	904.373
ENSG00000147576	ADHFE1	alcohol dehydrogenase iron containing 1 [Source:HGNC Symbol;Acc:HGNC:16354]	137872	80.337	88.8315	69.8888	-1.33276	0.565893	-2.51884	0.00046024	0.0225021	protein_coding	8	66432492	66468907	1	52.3817	91.1422	99.0475	81.6448	91.6172	83.2061	68.2063	88.0302	90.5292	93.6989	161.531	129.221	62.1883	69.5191	44.0262	86.9146	137.484	75.509	91.8824	67.0683	100.614	57.6299	43.7735	93.9664	118.445	45.9928	108.336	64.707	19.3532	68.1318	115.94	130.297	74.332
ENSG00000255921		novel transcript, antisense to BCAT1		11.6053	0.294581	25.5935	4.77664	1.50917	27.4103	0.000462634	0.0225224	lncRNA	12	24949163	24960158	1	0	0	0	0	0	0	1.53273	0	0	2.86833	0.784129	0	0	0	0	0	0	0	0	1.00102	0	17.3977	6.25336	0	6.07411	10.7316	2.30503	8.23544	200.444	32.6465	12.4222	6.85773	0
ENSG00000286190		uncharacterized LOC728392 [Source:NCBI gene (formerly Entrezgene);Acc:728392]	728392	272.951	254.723	295.7	-1.18717	0.497356	-2.27706	0.000464423	0.0225372	protein_coding	17	5499427	5501006	-1	260.956	200.201	217.516	188.915	277.715	208.015	262.862	277.938	99.234	174.968	345.801	297.742	289.962	200.658	217.129	564.56	295.913	223.432	279.476	232.237	233.948	205.51	329.344	223.73	258.15	328.082	416.058	481.185	367.711	229.945	536.223	427.465	447.541
ENSG00000177337	DLGAP1-AS1	DLGAP1 antisense RNA 1 [Source:HGNC Symbol;Acc:HGNC:31676]		81.4888	47.9371	123.002	1.47638	0.507204	2.7825	0.000469751	0.0227363	lncRNA	18	3593732	3598363	1	30.4766	28.8228	33.0158	42.9082	46.2176	23.6566	77.4027	50.4442	30.4666	36.3322	55.6731	113.235	18.7314	53.7193	32.019	86.9146	60.6862	71.1765	49.7696	20.0204	44.99	91.338	170.925	76.0681	104.778	50.592	65.6934	97.6487	217.032	255.494	124.222	80.0069	164.15
ENSG00000230149		novel transcript, antisense to SUN2		63.4833	44.7691	86.6495	1.35953	0.468863	2.56601	0.000470856	0.0227363	lncRNA	22	38734730	38738990	1	59.0484	71.6674	64.0896	69.1299	19.6323	37.5243	38.3181	37.0914	33.9485	61.1911	32.1493	57.2837	43.4569	28.4397	57.0339	29.9971	12.3521	43.9438	78.1	33.0337	32.72	69.5908	93.8004	56.6782	68.3337	64.3899	32.2704	88.2368	190.767	86.5842	84.8847	64.0055	69.6863
ENSG00000135842	NIBAN1	niban apoptosis regulator 1 [Source:HGNC Symbol;Acc:HGNC:16784]	116496	1790.68	1227.28	2487.66	1.41592	0.483555	2.6683	0.000472188	0.0227443	protein_coding	1	184790724	184974508	-1	532.388	1305.59	993.712	1219.31	872.408	1538.5	2554.29	1089.5	1430.19	1832.87	1358.11	941.85	708.048	1060.17	1327.79	960.675	941.442	2196.57	1185.28	697.711	1026.59	912.292	4889.09	1463.19	1544.34	1126.82	1506.34	1596.5	3175.31	2740.89	2229.78	4464.38	752.612
ENSG00000137094	DNAJB5	DnaJ heat shock protein family (Hsp40) member B5 [Source:HGNC Symbol;Acc:HGNC:14887]	25822	175.514	69.9075	306.151	2.05594	0.688786	4.15814	0.000480187	0.0230727	protein_coding	9	34989641	34998900	1	40.0005	61.5405	51.1422	50.6555	69.1219	56.2865	62.8418	31.1567	124.478	225.642	53.3208	28.6418	47.2032	51.3494	87.0518	49.9951	44.5748	57.5601	129.401	101.103	44.99	195.724	580.52	71.5935	48.5929	579.509	116.404	131.767	548.801	464.148	99.3772	100.58	91.3664
ENSG00000066382	MPPED2	metallophosphoesterase domain containing 2 [Source:HGNC Symbol;Acc:HGNC:1180]	744	71.5151	106.289	28.5824	-1.97086	1.0717	-3.92003	0.000498277	0.0237662	protein_coding	11	30384493	30586872	-1	158.097	130.092	44.6685	162.098	120.657	65.2597	83.5336	155.784	91.3997	30.5956	174.861	55.2854	117.633	366.556	17.0101	46.1493	183.67	34.6599	39.8157	74.0755	80.1641	14.1356	14.5912	11.9322	19.7409	21.4633	115.252	18.8239	19.3532	11.3553	35.1961	50.29	55.749
ENSG00000177542	SLC25A22	solute carrier family 25 member 22 [Source:HGNC Symbol;Acc:HGNC:19954]	79751	311.921	300.309	326.486	-1.16134	0.4921	-2.23665	0.000507783	0.0241606	protein_coding	11	790475	798281	-1	285.718	287.449	319.8	363.528	411.868	370.349	393.144	398.114	151.462	185.486	377.166	213.149	256.246	379.195	217.129	441.495	358.21	131.212	230.472	261.266	274.03	266.402	255.346	568.273	529.966	240.695	353.822	489.42	261.268	201.557	577.63	324.599	449.089
ENSG00000235947	EGOT	eosinophil granule ontogeny transcript [Source:HGNC Symbol;Acc:HGNC:37129]	100126791	11.135	0.32518	24.5046	3.33035	1.17441	10.0585	0.00052451	0.0246501	lncRNA	3	4749192	4751590	-1	0	0.778993	0	1.1919	1.22702	0	0.766363	0.494551	0	0	0	0	0	2.36997	0	0	0	0	0	0	0	55.4552	27.0979	14.9153	56.1855	0	4.61006	23.5298	26.2651	25.5494	26.9147	20.5732	68.1377
ENSG00000272941		novel transcript, antisense to C7orf49		51.7765	45.3039	59.809	1.43622	0.500788	2.70611	0.000523903	0.0246501	lncRNA	7	135168403	135169547	1	57.1436	19.4748	37.5474	29.7974	24.1313	35.0771	94.2626	31.6513	29.5961	32.5078	37.6382	62.6124	82.4183	30.0196	52.0309	47.6876	41.3526	62.5115	62.7863	50.051	31.084	68.5035	40.6468	14.9153	68.3337	68.9891	12.6777	27.0593	53.9125	31.2271	51.759	48.0041	68.1377
ENSG00000140090	SLC24A4	solute carrier family 24 member 4 [Source:HGNC Symbol;Acc:HGNC:10978]	123041	722.914	902.611	501.071	-1.89096	1.14766	-3.70881	0.000525652	0.0246501	protein_coding	14	92322581	92501481	1	160.002	943.361	783.317	1084.03	815.556	1239.93	2003.27	1665.65	121.866	217.037	2320.24	844.601	619.635	943.248	629.374	1301.41	960.776	455.53	349.919	688.702	807.367	303.373	146.954	325.154	457.077	499.788	601.613	970.605	165.885	510.989	1022.76	2011.6	109.949
ENSG00000137841	PLCB2	phospholipase C beta 2 [Source:HGNC Symbol;Acc:HGNC:9055]	5330	5168.83	5931.46	4229.31	-1.48078	0.733323	-2.791	0.000524272	0.0246501	protein_coding	15	40278176	40307935	-1	2904.8	5384.4	6316.38	10521.5	5749.8	8174.59	7771.69	7270.9	1291.78	3244.09	10145.8	4468.13	4584.7	4934.28	4920.93	7646.17	8428.94	4714.36	3627.06	4992.09	7468.35	3465.41	1912.49	5658.87	4872.95	4028.97	6245.48	7707.19	1309.11	2655.72	6387.06	9436.24	5254.34
ENSG00000103257	SLC7A5	solute carrier family 7 member 5 [Source:HGNC Symbol;Acc:HGNC:11063]	8140	6575.02	2646.54	11434.6	2.30316	0.765434	4.93536	0.000522389	0.0246501	protein_coding	16	87830023	87869507	-1	2176.22	1713.79	3985.85	1281.88	1305.14	2648.73	1360.29	924.811	2310.24	4327.36	685.328	1835.74	6362.69	1466.22	3542.11	426.881	1286.76	3081.63	9637.7	4612.7	605.321	16147.2	10300.3	4634.19	8354.94	22251.3	4725.31	4334.19	19843.9	17680.2	4561	4919.28	1291.52
ENSG00000051382	PIK3CB	phosphatidylinositol-4,5-bisphosphate 3-kinase catalytic subunit beta [Source:HGNC Symbol;Acc:HGNC:8976]	5291	1187.61	786.373	1684.03	1.58349	0.545883	2.99694	0.000531806	0.024686	protein_coding	3	138652698	138834928	-1	554.293	820.28	860.354	746.126	725.166	724.382	829.971	897.116	833.043	946.55	849.211	598.148	499.005	611.453	1588.94	707.623	814.162	1313.36	579.625	415.423	599.595	748.101	1461.2	917.291	651.448	791.075	706.492	909.427	2152.35	1371.15	954.435	1161.24	656.599
ENSG00000156127	BATF	basic leucine zipper ATF-like transcription factor [Source:HGNC Symbol;Acc:HGNC:958]	10538	139.328	87.665	203.221	1.87848	0.642143	3.67688	0.000535276	0.024686	protein_coding	14	75522455	75546993	1	20.9527	41.2866	30.4264	68.534	76.075	99.521	205.385	125.122	83.5654	66.9278	172.508	36.6349	17.9822	44.2395	125.074	119.219	116.539	196.2	32.9245	53.054	108.794	71.7655	175.094	181.967	145.779	111.916	123.319	112.943	393.976	255.494	180.121	233.163	48.0061
ENSG00000166920	C15orf48	chromosome 15 open reading frame 48 [Source:HGNC Symbol;Acc:HGNC:29898]	84419	325.94	44.4798	673.983	4.35189	1.29661	20.4198	0.000528888	0.024686	protein_coding	15	45430579	45448761	1	37.1434	16.3589	40.7843	2.38379	4.49906	18.7622	6.1309	1.48365	221.971	154.89	7.05716	51.955	44.2062	4.73994	97.0577	3.84578	6.44456	69.3197	45.9412	99.101	0	473	223.037	29.8306	9.11116	1559.15	4.61006	31.7652	1450.11	817.582	64.1811	70.8632	15.4858
ENSG00000197599	CCDC154	coiled-coil domain containing 154 [Source:HGNC Symbol;Acc:HGNC:34454]	645811	106.016	119.337	89.616	-1.76931	0.920005	-3.4089	0.000534083	0.024686	protein_coding	16	1434383	1444556	-1	93.3346	110.617	136.595	169.845	160.739	204.752	249.834	109.296	13.0571	23.9028	239.943	85.9255	87.6631	119.289	56.0333	216.133	163.799	18.5678	37.5186	75.0765	134.152	89.1633	42.7313	123.797	136.667	52.1251	91.0487	137.649	91.2365	34.0659	82.8143	102.866	170.344
ENSG00000166145	SPINT1	serine peptidase inhibitor, Kunitz type 1 [Source:HGNC Symbol;Acc:HGNC:11246]	6692	159.672	178.767	136.149	-1.71583	0.90037	-3.28485	0.000540443	0.024807	protein_coding	15	40844018	40858207	1	107.62	199.422	207.806	122.765	217.182	270.828	257.498	277.938	97.493	76.4889	294.048	82.5951	128.872	252.007	116.069	236.131	349.08	104.599	77.3344	104.106	174.234	173.977	42.7313	134.238	189.816	78.1877	261.621	154.12	35.9416	65.293	173.91	470.897	89.8178
ENSG00000169683	LRRC45	leucine rich repeat containing 45 [Source:HGNC Symbol;Acc:HGNC:28302]	201255	368.921	436.339	285.812	-1.65041	0.867289	-3.13924	0.000539251	0.024807	protein_coding	17	82023305	82031151	1	421.91	599.046	458.985	570.918	649.091	597.126	588.567	539.061	103.586	116.646	569.277	283.088	364.139	705.461	204.121	477.645	575.177	121.928	250.38	434.443	532.518	389.274	63.5758	675.663	495.04	182.438	567.038	307.064	123.031	132.005	387.157	502.9	348.431
ENSG00000110047	EHD1	EH domain containing 1 [Source:HGNC Symbol;Acc:HGNC:3242]	10938	5580.6	2512.59	9376.14	1.66785	0.574615	3.17741	0.000550234	0.025087	protein_coding	11	64851642	64888296	-1	1682.88	2033.17	2398.5	1766.39	2093.29	1904.77	2558.12	1899.57	1539	3918.14	2527.25	2088.86	2417.85	2130.6	4541.7	3361.98	1889.87	3142.91	2875.15	4599.69	1394.69	10450.6	9545.76	2793.64	3478.95	14099.8	2481.37	3037.7	18742.2	22352.9	6509.21	6087.38	2411.14
ENSG00000135119	RNFT2	ring finger protein, transmembrane 2 [Source:HGNC Symbol;Acc:HGNC:25905]	84900	139.734	156.232	119.489	-1.51808	0.732978	-2.8641	0.0005522	0.025087	protein_coding	12	116738178	116853631	1	348.576	134.766	147.6	195.471	200.004	97.8895	89.6645	111.769	154.074	54.4984	137.223	91.2542	333.419	325.476	96.0571	109.989	126.206	63.1305	88.054	158.161	217.588	97.8621	100.054	65.6274	138.186	137.978	141.759	150.591	174.179	72.3901	221.528	89.1505	343.786
ENSG00000266970		novel transcript	101928674	9.91655	3.12038	18.3223	2.67347	0.902551	6.37964	0.000552247	0.025087	lncRNA	17	78360453	78373911	1	7.61915	3.11597	0.647369	2.38379	0.409005	3.26298	3.83181	6.92372	0	10.5172	2.35239	1.99827	7.49257	1.57998	0	5.38409	0	1.23785	0.765687	6.00612	0	8.69885	7.29559	4.47459	12.1482	21.4633	10.3726	8.23544	45.6182	42.5824	12.4222	11.4296	1.54858
ENSG00000123342	MMP19	matrix metallopeptidase 19 [Source:HGNC Symbol;Acc:HGNC:7165]	4327	440.436	47.4851	926.26	3.44771	1.0826	10.911	0.000556658	0.0251955	protein_coding	12	55835433	55842966	-1	8.57154	31.9387	17.479	4.17163	22.9043	97.0738	30.6545	27.2003	68.7674	170.188	3.92064	43.9619	22.4777	24.4897	90.0535	53.0717	94.5202	48.8952	50.5353	47.0479	39.264	249.005	823.359	26.8476	135.149	489.056	23.0503	422.36	1400.34	432.921	412.001	198.874	18.583
ENSG00000248208	WDR45P1	WD repeat domain 45 pseudogene 1 [Source:HGNC Symbol;Acc:HGNC:52406]		27.3306	12.5787	45.5772	1.99112	0.690079	3.97544	0.000567713	0.0253971	processed_pseudogene	4	153658572	153659653	1	6.66676	19.4748	15.5369	5.95948	8.18011	12.2362	10.7291	12.3638	3.48189	18.1661	22.7397	4.66262	8.24183	13.4298	2.00119	29.9971	13.4262	8.66497	9.18824	12.0122	26.994	75.0276	22.929	13.4238	18.2223	24.5295	25.3553	20.0003	102.295	113.553	45.5479	57.1478	9.2915
ENSG00000092200	RPGRIP1	RPGR interacting protein 1 [Source:HGNC Symbol;Acc:HGNC:13436]	57096	45.9797	51.564	39.1075	-1.80516	0.89271	-3.49467	0.000566191	0.0253971	protein_coding	14	21287939	21351301	1	20.0003	44.4026	63.4422	99.5232	61.3508	69.3384	49.0472	114.241	31.337	19.1222	108.21	25.9775	53.9465	44.2395	29.0173	58.4558	83.7792	9.28389	22.2049	26.0265	49.898	42.4069	18.7601	35.7967	27.3335	50.592	31.1179	32.9417	15.2061	55.3571	86.9551	43.4323	23.2288
ENSG00000149346	SLX4IP	SLX4 interacting protein [Source:HGNC Symbol;Acc:HGNC:16225]	128710	294.416	352.475	222.819	-1.82325	1.06997	-3.53879	0.000568921	0.0253971	protein_coding	20	10435305	10636829	1	310.48	560.875	499.769	656.734	510.439	377.69	428.397	406.027	72.2493	53.5422	531.639	303.071	221.031	445.555	138.082	506.104	511.805	80.4604	209.798	147.15	431.086	189.2	52.1113	490.714	438.854	49.0589	296.197	243.534	64.9714	80.9066	399.579	352.03	490.901
ENSG00000163739	CXCL1	C-X-C motif chemokine ligand 1 [Source:HGNC Symbol;Acc:HGNC:4602]	2919	403.72	88.3545	793.649	3.84306	1.18379	14.3508	0.000577398	0.0255417	protein_coding	4	73869393	73871308	1	40.0005	100.49	98.4001	194.875	24.1313	106.863	70.5054	23.7385	41.7827	163.495	51.7525	13.9879	43.4569	18.9598	312.186	70.7623	25.2412	36.5166	22.2049	220.224	175.87	138.094	620.125	14.9153	1.51853	240.695	32.2704	61.1775	906.835	2879.99	167.699	107.438	0
ENSG00000226174	TEX22	testis expressed 22 [Source:HGNC Symbol;Acc:HGNC:40026]	647310	38.5868	42.6818	33.553	-2.1235	1.11376	-4.35751	0.000578937	0.0255518	protein_coding	14	105398538	105450106	1	38.0958	33.4967	31.7211	63.7664	68.3039	68.5226	29.1218	59.3462	0	11.4733	57.2414	22.647	18.7314	80.579	24.0143	59.225	77.8717	9.28389	13.0167	57.0581	72.8021	53.2805	30.2246	52.2036	75.9264	32.1949	39.1855	35.2947	34.5593	21.2912	41.4072	18.2873	69.6863
ENSG00000170919	TPT1-AS1	TPT1 antisense RNA 1 [Source:HGNC Symbol;Acc:HGNC:43686]		435.185	435.443	435.242	-1.25797	0.57636	-2.39159	0.00058502	0.025704	lncRNA	13	45341345	45417975	1	423.815	164.368	345.048	569.726	484.671	373.612	491.239	724.518	228.064	232.335	673.567	352.361	427.076	471.624	258.153	855.301	530.602	222.813	332.308	406.414	576.691	362.09	327.259	499.663	728.893	240.695	316.942	611.775	387.064	326.465	734.977	356.602	1124.27
ENSG00000231881		novel transcript		59.9327	4.04951	129.046	3.44273	1.10023	10.8734	0.000588182	0.025727	lncRNA	6	44058792	44089288	1	1.90479	0	3.23685	0.595948	2.86304	0.815746	2.29909	0	22.6323	11.4733	0.784129	3.99654	2.24777	0.78999	0	2.30747	0	0	16.0794	13.0133	0	208.772	125.067	19.3899	36.4447	144.111	42.6431	114.12	239.15	344.917	225.669	38.8605	34.0688
ENSG00000270605		novel transcript		82.6396	92.1939	70.9003	-1.54486	0.749147	-2.91776	0.000593215	0.0258314	lncRNA	1	28239509	28241453	-1	55.2388	77.1203	47.9053	103.099	89.5722	117.467	133.347	129.078	50.4875	23.9028	108.21	55.2854	55.445	102.699	36.0214	228.439	155.206	51.3709	46.7069	60.0612	209.408	110.91	62.5336	110.373	101.741	68.9891	95.6588	55.2951	69.1186	59.6154	95.2365	41.1464	140.921
ENSG00000273129	PACERR	PTGS2 antisense NFKB1 complex-mediated expression regulator RNA [Source:HGNC Symbol;Acc:HGNC:50552]	103752588	12.5672	1.12235	26.7199	4.03259	1.26371	16.3655	0.00059262	0.0258314	lncRNA	1	186680622	186681446	1	0	0	0	1.1919	2.04503	0	5.36454	3.46186	6.09331	0	0	0	0	0	1.00059	1.53831	0	1.23785	0	0	1.636	25.0092	3.12668	1.49153	6.07411	4.59928	10.3726	12.9414	92.6189	92.2619	33.1257	11.4296	0
ENSG00000145860	RNF145	ring finger protein 145 [Source:HGNC Symbol;Acc:HGNC:20853]	153830	1961.5	1636.12	2365.04	1.19221	0.418314	2.28502	0.00059977	0.025943	protein_coding	5	159157409	159210053	-1	1120.02	895.842	1073.34	1357.57	1485.51	1102.89	1818.58	1546.46	1875	2321.44	1490.63	1319.52	1670.09	1243.44	1774.05	2303.62	1588.05	2396.48	1820.04	2105.14	2050.73	1411.39	1660.27	1190.24	1696.2	2833.15	1187.09	1518.85	3211.25	2611.72	1614.88	1133.81	1509.87
ENSG00000278969		novel transcript		24.586	2.5644	51.821	3.70915	1.17601	13.0787	0.000610022	0.0262121	TEC	12	24902309	24904681	1	2.85718	0	0.647369	0.595948	0	0.815746	0	1.97821	5.22284	7.64889	1.56826	0	5.99406	0	0	0	0	3.71356	6.89118	11.0112	4.908	72.8529	26.0557	17.8984	12.1482	30.6618	0	5.88245	200.444	82.326	35.1961	22.8591	6.19433
ENSG00000188215	DCUN1D3	defective in cullin neddylation 1 domain containing 3 [Source:HGNC Symbol;Acc:HGNC:28734]	123879	385.712	231.809	576.107	1.69206	0.590979	3.23117	0.000609256	0.0262121	protein_coding	16	20854925	20900358	-1	150.478	231.361	161.842	222.884	177.099	343.429	287.386	230.956	356.024	244.765	236.807	253.78	99.6512	140.618	408.243	217.671	161.114	435.724	122.51	154.157	231.494	471.913	595.112	238.645	198.927	309.685	193.623	216.474	745.098	1308.7	527.941	310.884	145.567
ENSG00000173890	GPR160	G protein-coupled receptor 160 [Source:HGNC Symbol;Acc:HGNC:23693]	26996	458.306	436.441	485.643	1.06162	0.37249	2.08728	0.000616564	0.026377	protein_coding	3	170037995	170085392	1	309.528	428.446	484.88	488.677	511.257	370.349	272.825	350.142	446.553	496.222	358.347	313.728	404.599	647.002	371.221	708.392	431.248	580.553	257.271	473.482	460.534	424.069	374.159	253.56	258.15	631.634	338.84	361.183	530.83	370.467	269.147	347.458	484.707
ENSG00000145743	FBXL17	F-box and leucine rich repeat protein 17 [Source:HGNC Symbol;Acc:HGNC:13615]	64839	449.718	468.367	426.986	-1.0418	0.443144	-2.0588	0.000616402	0.026377	protein_coding	5	107859035	108382098	-1	539.055	616.184	662.906	522.646	558.292	507.394	580.903	513.344	245.474	239.028	616.325	568.84	476.527	470.044	280.167	496.874	488.175	266.138	417.299	355.362	414.726	531.717	250.134	522.036	495.04	424.666	638.494	468.243	233.621	271.108	612.826	580.621	760.354
ENSG00000172986	GXYLT2	glucoside xylosyltransferase 2 [Source:HGNC Symbol;Acc:HGNC:33383]	727936	20.2367	13.1057	29.0573	2.38731	0.811953	5.23182	0.000618134	0.0263864	protein_coding	3	72888046	72998138	1	0.952394	9.34792	22.6579	6.55542	1.63602	20.3936	13.7945	12.8583	4.35237	41.1128	21.1715	3.99654	25.4747	11.0599	17.0101	6.15324	6.44456	9.28389	15.3137	15.0153	10.634	11.9609	3.12668	5.96612	0	15.3309	16.1352	18.8239	62.2067	25.5494	10.3518	11.4296	3.09717
ENSG00000103227	LMF1	lipase maturation factor 1 [Source:HGNC Symbol;Acc:HGNC:14154]	64788	329.359	259.722	415.698	-1.17205	0.516722	-2.25332	0.000619821	0.0263896	protein_coding	16	853634	981318	-1	339.052	230.582	218.163	309.297	336.611	256.96	257.498	329.866	151.462	111.865	326.198	274.429	322.93	306.516	205.122	413.036	217.504	116.977	238.894	248.253	242.946	282.713	335.597	551.866	730.412	245.295	384.94	657.658	185.238	300.916	844.706	294.882	895.081
ENSG00000198435	NRARP	NOTCH regulated ankyrin repeat protein [Source:HGNC Symbol;Acc:HGNC:33843]	441478	151.558	48.4716	279.091	1.90587	0.662728	3.74735	0.000623394	0.0264373	protein_coding	9	137299631	137302271	-1	64.7628	38.9497	115.879	43.5042	42.1275	85.6533	26.0563	22.2548	66.156	63.1034	7.84129	39.9654	78.672	25.2797	105.062	15.3831	23.63	44.5627	69.6775	23.0235	16.36	134.832	283.486	171.526	180.705	447.663	35.728	387.065	248.827	361.95	335.398	198.874	312.814
ENSG00000106077	ABHD11	abhydrolase domain containing 11 [Source:HGNC Symbol;Acc:HGNC:16407]	83451	140.861	155.76	122.543	-1.01366	0.416842	-2.01902	0.00064088	0.0270612	protein_coding	7	73736094	73738867	-1	114.287	187.737	134.653	174.613	152.15	191.7	167.067	173.093	213.266	78.4011	159.962	129.887	97.4034	207.767	127.076	230.747	148.762	126.88	117.15	137.14	201.228	63.0667	138.616	170.035	215.631	90.4524	175.182	152.944	69.1186	107.875	144.925	201.16	136.275
ENSG00000255468		novel transcript, antisense to SLC29A2	102724064	22.2039	15.3006	30.7555	-2.77538	1.07164	-6.84655	0.000645002	0.0271765	lncRNA	11	66347950	66364804	1	16.1907	14.0219	14.2421	11.323	23.3133	13.0519	13.7945	4.45096	5.22284	7.64889	29.7969	30.6401	21.7284	22.1197	9.00535	25.3821	7.51865	8.66497	29.0961	10.0102	4.09	15.223	25.0134	32.8137	30.3705	42.9266	32.2704	65.8835	30.4122	21.2912	55.8997	16.0014	66.5891
ENSG00000117560	FASLG	Fas ligand [Source:HGNC Symbol;Acc:HGNC:11936]	356	112.38	29.5002	214.882	2.63428	0.882397	6.20866	0.000654906	0.0275327	protein_coding	1	172659103	172666876	1	12.3811	17.1379	22.6579	19.6663	33.1294	25.2881	98.0945	55.8843	36.5599	7.64889	49.4001	1.33218	2.24777	15.7998	29.0173	37.6886	59.6121	52.6087	35.9873	0	7.36201	106.561	408.553	286.374	95.6672	508.986	48.4057	290.593	399.505	86.5842	343.679	34.2887	78.9778
ENSG00000229419	RALGAPA1P1	RALGAPA1 pseudogene 1 [Source:HGNC Symbol;Acc:HGNC:23203]		27.1468	12.4634	45.312	2.08114	0.728692	4.23143	0.000656279	0.0275327	processed_pseudogene	9	105520128	105526359	1	24.7622	17.9168	18.7737	6.55542	13.9062	17.1307	6.1309	1.97821	21.7618	30.5956	4.70477	11.9896	22.4777	2.36997	14.0083	0.769155	3.22228	16.0921	11.4853	11.0112	4.09	32.6207	27.0979	34.3052	16.7038	22.9964	14.9827	42.3537	125.796	66.7124	28.985	25.145	29.4231
ENSG00000146054	TRIM7	tripartite motif containing 7 [Source:HGNC Symbol;Acc:HGNC:16278]	81786	40.6747	41.5602	39.6025	-2.07965	1.12704	-4.22704	0.000660642	0.0276172	protein_coding	5	181193924	181205293	-1	3.80958	56.0875	57.6159	16.6865	20.4503	52.2077	82.0008	73.1936	35.6894	21.0345	92.5272	33.3045	20.9792	14.2198	26.0155	53.8409	54.7787	25.9949	19.1422	24.0245	89.1621	40.2322	12.5067	46.2375	9.11116	64.3899	54.1682	52.9421	13.8237	42.5824	26.9147	171.443	17.0344
ENSG00000110777	POU2AF1	POU class 2 homeobox associating factor 1 [Source:HGNC Symbol;Acc:HGNC:9211]	5450	1756.31	2152.29	1268.38	-1.47248	0.776326	-2.77499	0.000661125	0.0276172	protein_coding	11	111352255	111455630	-1	3462.9	1614.85	1982.89	2911.8	3280.22	1479.76	2042.36	2317.96	2540.04	490.485	1865.44	1693.87	2810.46	4096.1	1920.14	1546.77	2108.98	2010.27	949.452	2092.13	1981.2	525.193	773.332	674.172	3173.72	797.208	1963.89	1422.38	1515.08	376.145	1703.9	1094.95	3908.62
ENSG00000248445	SEMA6A-AS1	SEMA6A antisense RNA 1 [Source:HGNC Symbol;Acc:HGNC:51110]		57.4389	71.4503	40.1691	-1.47986	0.706613	-2.78922	0.000664684	0.0276474	lncRNA	5	116447547	116508276	1	61.9056	63.0985	61.5001	113.23	69.1219	97.0738	87.3654	72.2045	33.078	11.4733	87.0383	84.5933	63.6868	79.789	33.0196	83.8379	65.5197	45.8005	70.4432	71.0724	145.604	33.7081	10.4223	53.6951	53.1485	35.2611	43.7956	51.7656	26.2651	31.2271	53.8293	29.7168	133.178
ENSG00000164181	ELOVL7	ELOVL fatty acid elongase 7 [Source:HGNC Symbol;Acc:HGNC:26292]	79993	112.779	61.2341	176.53	2.40466	0.818653	5.2951	0.000675496	0.0279779	protein_coding	5	60751791	60844274	-1	25.7146	44.4026	54.379	60.1907	58.4878	257.776	24.5236	86.052	76.6017	44.9372	50.9684	44.628	94.4064	22.9097	58.0345	19.2289	132.113	29.0895	41.3471	38.0387	22.086	96.7747	39.6046	50.712	118.445	58.2575	51.8632	32.9417	308.269	241.3	153.207	43.4323	29.4231
ENSG00000182048	TRPC2	transient receptor potential cation channel subfamily C member 2 (pseudogene) [Source:HGNC Symbol;Acc:HGNC:12334]	7221	37.9012	49.8634	23.1501	-1.76482	0.89957	-3.39831	0.000674671	0.0279779	transcribed_unprocessed_pseudogene	11	3609901	3637559	1	39.0481	58.4245	68.6211	133.492	30.6754	41.603	29.8882	34.1241	85.3064	45.8934	62.7303	24.6453	120.63	31.5996	50.0297	34.612	33.8339	42.087	39.05	22.0224	18.814	41.3196	8.33781	44.7459	15.1853	7.66546	43.7956	23.5298	15.2061	17.033	55.8997	45.7182	7.74292
ENSG00000171812	COL8A2	collagen type VIII alpha 2 chain [Source:HGNC Symbol;Acc:HGNC:2216]	1296	124.925	133.779	114.042	-1.72492	0.97886	-3.30562	0.000677867	0.0280166	protein_coding	1	36095239	36125222	-1	27.6194	182.284	162.49	147.199	158.694	274.091	169.366	165.18	19.1504	30.5956	198.385	82.5951	116.884	184.068	66.0393	99.9902	218.041	168.967	106.43	48.0489	183.232	160.929	36.4779	141.695	37.9632	76.6546	174.03	165.885	52.5301	89.423	151.136	317.742	21.6802
ENSG00000241886		novel transcript, sense intronic to GK		21.4015	12.2894	32.6721	2.33521	0.806002	5.04623	0.000682646	0.0281545	lncRNA	X	30698207	30721932	1	5.71436	8.56893	11.0053	14.3027	9.81613	16.3149	45.2154	19.7821	16.539	10.5172	11.7619	6.66089	0	12.6398	5.00297	1.53831	31.6857	7.42711	0.765687	4.00408	18.814	17.3977	22.929	16.4068	3.03705	39.8604	14.9827	12.9414	56.6772	46.8406	4.14072	18.2873	15.4858
ENSG00000054392	HHAT	hedgehog acyltransferase [Source:HGNC Symbol;Acc:HGNC:18270]	55733	97.2705	106.691	85.6846	-1.69861	0.930913	-3.24588	0.000686323	0.0282464	protein_coding	1	210328252	210676296	1	138.097	163.589	126.237	94.7557	165.647	140.308	126.45	122.649	29.5961	22.9467	154.473	129.221	117.633	130.348	20.0119	114.604	139.095	61.8926	83.4599	58.0591	101.432	65.2414	15.6334	213.289	173.112	50.592	156.742	147.061	34.5593	36.9047	128.362	112.01	122.338
ENSG00000242498	ARPIN	actin related protein 2/3 complex inhibitor [Source:HGNC Symbol;Acc:HGNC:28782]	348110	170.714	194.915	140.903	-1.72292	1.01398	-3.30103	0.000697224	0.0286346	protein_coding	15	89895006	89912952	-1	80.9535	260.184	258.948	32.7771	239.268	353.218	248.302	391.19	122.737	97.5234	54.889	189.169	229.273	307.306	105.062	124.603	433.933	225.289	77.3344	109.111	152.148	133.745	36.4779	101.424	82.0005	72.0553	231.656	172.944	78.7952	173.168	345.75	400.034	32.5203
ENSG00000179978	NAIPP2	NAIP pseudogene 2 [Source:HGNC Symbol;Acc:HGNC:16042]		22.6158	26.8232	17.4287	-1.87188	0.863405	-3.66009	0.000701369	0.0286624	unprocessed_pseudogene	5	70094659	70128434	-1	20.0003	10.9059	23.3053	26.8176	18.8142	34.2613	79.7017	39.5641	16.539	32.5078	44.6953	31.3062	22.4777	26.8597	22.0131	24.613	31.1487	8.66497	21.4392	17.0173	10.634	13.0483	5.21113	26.8476	13.6667	15.3309	8.06761	24.7063	8.29423	11.3553	31.0554	45.7182	30.9717
ENSG00000167107	ACSF2	acyl-CoA synthetase family member 2 [Source:HGNC Symbol;Acc:HGNC:26101]	80221	300.603	309.012	290.427	-1.11492	0.496107	-2.16583	0.000705246	0.0286624	protein_coding	17	50426158	50474845	1	326.671	370.022	370.943	324.791	352.154	358.928	381.649	449.053	136.664	208.432	381.871	325.052	311.691	293.086	193.115	331.506	342.099	194.343	214.392	301.307	321.474	220.733	132.363	389.29	390.262	295.887	472.531	442.361	94.0012	185.943	414.072	372.603	444.443
ENSG00000149639	SOGA1	suppressor of glucose, autophagy associated 1 [Source:HGNC Symbol;Acc:HGNC:16111]	140710	931.047	825.359	1062.3	-1.24596	0.597007	-2.37176	0.000704049	0.0286624	protein_coding	20	36777447	36863538	-1	880.964	788.341	978.175	1009.54	1237.65	858.165	1187.86	1295.23	369.951	331.771	1211.48	578.165	1120.89	1325.6	462.275	723.006	1258.84	363.929	386.672	503.513	460.534	852.488	759.783	1345.36	1706.82	648.498	1136.38	1683.56	483.83	745.192	1743.24	1382.98	2172.66
ENSG00000155304	HSPA13	heat shock protein family A (Hsp70) member 13 [Source:HGNC Symbol;Acc:HGNC:11375]	6782	1129.3	985.092	1308.26	1.19055	0.425732	2.2824	0.000702282	0.0286624	protein_coding	21	14371115	14383484	-1	1144.78	775.098	1166.56	628.725	795.515	639.545	998.571	727.485	1279.6	1554.64	706.5	1157.66	983.774	540.353	1458.87	602.249	592.899	1796.74	1321.58	1332.36	483.438	1230.89	1331.97	569.765	877.709	1542.29	1048.79	954.134	2337.59	1300.18	759.822	836.643	650.405
ENSG00000142224	IL19	interleukin 19 [Source:HGNC Symbol;Acc:HGNC:5990]	29949	13.5091	2.77958	26.7781	2.99408	1.01043	7.96726	0.000709461	0.0287737	protein_coding	1	206770764	206842979	1	0	0	4.53158	2.97974	4.09005	1.63149	8.42999	3.95641	3.48189	5.73667	0	0	0.749257	0	5.00297	0	1.07409	4.33248	3.82843	2.00204	6.54401	33.7081	21.8868	4.47459	9.11116	19.9302	14.9827	15.2944	11.059	19.8718	2.07036	4.57182	17.0344
ENSG00000144218	AFF3	AF4/FMR2 family member 3 [Source:HGNC Symbol;Acc:HGNC:6473]	3899	2629.03	3122.65	2021.75	-1.64851	1.00686	-3.13509	0.000715152	0.0288845	protein_coding	2	99545419	100192428	-1	6667.71	2770.1	3966.43	3581.05	3885.14	1920.27	2155.78	2357.03	2281.51	786.88	2300.63	3227.2	7899.42	4766.8	2419.44	1993.65	2668.58	1474.28	2973.16	3471.54	2009.01	2185.59	500.269	1625.77	3951.21	1251	2967.73	3348.29	728.51	546.474	3037.22	1362.4	8061.93
ENSG00000073060	SCARB1	scavenger receptor class B member 1 [Source:HGNC Symbol;Acc:HGNC:1664]	949	612.619	742.801	452.07	-1.53592	0.860425	-2.89973	0.000714979	0.0288845	protein_coding	12	124776856	124882668	-1	901.917	713.558	1006.66	1066.15	1000.43	1015.6	717.316	1122.63	235.028	150.11	1100.13	435.622	836.171	1682.68	334.199	396.115	1251.32	198.675	328.48	510.52	595.505	417.545	135.489	1005.29	689.411	375.608	821.744	535.303	294.445	275.366	447.197	710.918	602.399
ENSG00000059804	SLC2A3	solute carrier family 2 member 3 [Source:HGNC Symbol;Acc:HGNC:11007]	6515	10387.8	5893.67	15950.2	1.86484	0.656679	3.64228	0.000717733	0.0289288	protein_coding	12	7919230	7936187	-1	5116.26	4473.76	5999.82	3257.45	1747.27	10789.9	3530.63	3644.84	2338.09	7702.43	4315.84	5016.32	5910.14	1673.99	19869.8	3253.53	3273.83	10550.8	8192.08	7628.77	5481.42	18605.8	7487.36	5341.17	4740.84	56588	6851.71	11041.4	18116	10708.1	11763.8	16938.6	14020.9
ENSG00000106341	PPP1R17	protein phosphatase 1 regulatory subunit 17 [Source:HGNC Symbol;Acc:HGNC:16973]	10842	15.4659	2.86772	31.044	3.77829	1.20585	13.7208	0.000727487	0.0292012	protein_coding	7	31687215	31708455	1	0	1.55799	0	0	0	0	9.19636	5.93462	0	5.73667	0.784129	3.33045	3.74628	3.94995	2.00119	9.22986	11.278	2.4757	0	1.00102	0	0	82.3359	5.96612	37.9632	107.316	4.61006	14.1179	20.7356	24.13	28.985	0	10.8401
ENSG00000077150	NFKB2	nuclear factor kappa B subunit 2 [Source:HGNC Symbol;Acc:HGNC:7795]	4791	6403.93	2222.49	11577.3	1.80506	0.641523	3.49443	0.000736128	0.0293668	protein_coding	10	102394110	102402524	1	1992.41	1280.67	2371.96	1050.66	1071.59	1248.91	1531.96	1262.1	2588.79	5078.86	1539.24	3816.03	2618.65	900.589	4142.46	1263.72	1303.41	4342.39	2830.74	3835.91	601.231	14134.6	11948.1	3405.16	4582.92	19812.1	2641.57	6531.88	30605.7	17538.3	6776.28	4846.13	7842.03
ENSG00000026508	CD44	CD44 molecule (Indian blood group) [Source:HGNC Symbol;Acc:HGNC:1681]	960	15056.2	9667.33	21725.6	1.49561	0.537327	2.81983	0.000750821	0.0298919	protein_coding	11	35138882	35232402	1	7379.15	9159.4	10792.9	4577.47	5764.93	8090.57	9995.67	6562.2	12184	19165.3	9629.1	11680.5	11027.6	4800.77	13083.8	8472.25	7502	13831.1	12245.6	11705.9	5363.63	13624.6	25428.3	7105.65	6204.7	19674.2	9965.8	13090.8	46518.2	27421.6	12724.4	23613.5	7972.11
ENSG00000117036	ETV3	ETS variant transcription factor 3 [Source:HGNC Symbol;Acc:HGNC:3492]	2117	2121.93	1214.71	3244.85	1.63025	0.583302	3.09567	0.000754207	0.0299276	protein_coding	1	157121191	157138474	-1	1390.49	1099.94	1584.11	612.634	663.816	865.506	682.063	662.699	887.012	2059.46	826.472	1278.23	2730.29	405.265	1874.11	661.474	563.362	1539.27	1960.16	2483.53	678.941	3026.11	2895.31	1754.04	1169.27	3659.49	923.165	1885.91	4908.8	5335.57	2958.54	2343.06	1619.82
ENSG00000100448	CTSG	cathepsin G [Source:HGNC Symbol;Acc:HGNC:2532]	1511	1750.45	1545.86	2003.2	2.6451	0.897525	6.25538	0.000764641	0.0301346	protein_coding	14	24573518	24576250	-1	893.345	2994.45	1936.93	1394.52	789.789	2532.89	701.988	1202.25	1290.04	2652.25	508.115	1299.54	690.815	3970.49	904.538	901.45	702.457	1703.9	1006.11	3222.28	1164.83	725.267	163.63	456.408	28.852	15.3309	1092.58	267.063	345.593	347.756	41.4072	1149.81	17.0344
ENSG00000171517	LPAR3	lysophosphatidic acid receptor 3 [Source:HGNC Symbol;Acc:HGNC:14298]	23566	14.4152	2.3401	29.3445	3.68477	1.19692	12.8596	0.000784203	0.0307812	protein_coding	1	84811602	84893206	-1	0	0.778993	3.23685	6.55542	0	0.815746	3.83181	1.48365	7.83426	12.4294	0.784129	0	1.49851	0	1.00059	0	2.14819	0.618926	6.12549	0	0	16.3104	12.5067	5.96612	7.59264	12.2647	12.6777	16.4709	55.2948	7.09707	8.28143	0	1.54858
ENSG00000284138	ATP6V0CP4	ATPase H+ transporting V0 subunit c pseudogene 4 [Source:HGNC Symbol;Acc:HGNC:40002]		17.9223	4.47143	34.558	2.17517	0.786083	4.51639	0.000795248	0.0310274	processed_pseudogene	1	42952202	42952641	-1	4.76197	3.11597	4.53158	3.57569	7.36209	6.52597	2.29909	1.97821	4.35237	0.956112	1.56826	12.6557	4.49554	7.10991	1.00059	0	1.07409	6.80819	10.7196	9.00918	0	46.7563	15.6334	40.2713	89.5931	26.0626	11.5252	24.7063	58.0596	53.9377	51.759	11.4296	43.3603
ENSG00000174989	FBXW8	F-box and WD repeat domain containing 8 [Source:HGNC Symbol;Acc:HGNC:13597]	26259	398.722	403.009	393.724	-1.19275	0.578136	-2.28588	0.000803227	0.0312371	protein_coding	12	116910950	117031148	1	494.292	582.687	583.927	477.95	478.536	456.818	361.723	445.096	217.618	111.865	433.623	312.396	458.545	671.492	284.169	407.652	512.879	162.159	301.681	271.276	436.812	406.671	217.825	499.663	557.3	173.239	515.175	538.833	251.592	204.396	432.705	514.33	907.47
ENSG00000113532	ST8SIA4	ST8 alpha-N-acetyl-neuraminide alpha-2,8-sialyltransferase 4 [Source:HGNC Symbol;Acc:HGNC:10871]	7903	936.018	735.381	1184.44	1.17715	0.427787	2.2613	0.000810288	0.0314256	protein_coding	5	100806933	100903282	-1	650.485	580.35	555.443	631.704	763.613	431.53	1240.74	852.607	759.923	611.911	1047.6	775.328	528.975	500.854	1258.75	675.318	649.289	1623.44	489.274	337.344	478.53	825.304	1560.21	639.867	1011.34	1172.82	662.697	897.662	1604.93	1267.54	1341.59	950.939	833.138
ENSG00000204366	ZBTB12	zinc finger and BTB domain containing 12 [Source:HGNC Symbol;Acc:HGNC:19066]	221527	59.4594	54.5939	65.5085	-1.88629	1.12825	-3.69683	0.000815216	0.031554	protein_coding	6	31899613	31902086	-1	53.3341	74.0044	59.558	93.5638	78.529	75.8644	74.3372	93.9648	0	3.82445	58.8097	45.2941	31.4688	121.659	14.0083	36.1503	90.2238	12.3785	42.1128	35.0357	52.352	61.9793	84.4204	59.6612	97.1858	59.7906	103.726	103.531	118.884	46.8406	76.6033	27.4309	102.207
ENSG00000232713	RPS12P3	ribosomal protein S12 pseudogene 3 [Source:HGNC Symbol;Acc:HGNC:35500]		47.3759	6.5774	97.8393	-3.97401	2.24448	-15.7143	0.000831048	0.0319673	processed_pseudogene	2	60938204	60938604	-1	0	2.33698	7.76843	14.8987	7.36209	8.15746	19.1591	6.92372	2.61142	4.78056	11.7619	5.32871	7.49257	3.94995	1.00059	7.69155	6.44456	0	14.548	1.00102	4.908	78.2897	142.785	58.1697	123.001	220.765	72.6085	81.1779	186.62	143.361	95.2365	52.5759	88.2693
ENSG00000185947	ZNF267	zinc finger protein 267 [Source:HGNC Symbol;Acc:HGNC:13060]	10308	1434.23	847.205	2160.58	1.7084	0.619359	3.26799	0.000832447	0.0319673	protein_coding	16	31873807	31917357	1	750.486	748.613	852.585	510.727	569.335	544.918	906.607	479.715	976.671	1569.94	860.189	903.883	683.322	410.795	2091.24	463.032	445.748	1657.48	1160.02	806.822	399.184	2083.38	2345.01	426.578	619.559	2922.07	986.554	818.838	4582.56	2424.36	921.309	752.064	746.417
ENSG00000274422		novel transcript		398.898	593.486	158.869	-1.51494	0.869662	-2.85786	0.000831069	0.0319673	lncRNA	22	22283928	22287220	-1	722.867	373.138	271.895	800.954	782.836	434.793	327.237	745.784	1505.92	384.357	388.144	198.495	589.665	798.68	503.299	668.396	614.918	237.668	136.292	831.847	1146.02	88.0759	116.729	290.848	264.224	68.9891	119.862	157.65	87.0894	114.972	207.036	107.438	415.02
ENSG00000105519	CAPS	calcyphosine [Source:HGNC Symbol;Acc:HGNC:1487]	828	306.307	341.969	262.476	-1.01927	0.449317	-2.0269	0.000838988	0.0321551	protein_coding	19	5912339	5916211	1	361.91	292.123	225.285	321.216	269.534	383.401	303.48	317.502	272.458	308.824	432.055	456.271	301.201	207.767	329.196	539.947	301.82	267.376	361.404	345.352	583.235	170.715	337.681	274.442	385.706	216.166	312.332	410.595	89.8541	259.753	391.298	219.447	421.215
ENSG00000085117	CD82	CD82 molecule [Source:HGNC Symbol;Acc:HGNC:6210]	3732	2235.25	1480.36	3169.5	1.57118	0.572245	2.97148	0.00084799	0.032373	protein_coding	11	44564427	44620358	1	1184.78	1698.98	1201.52	1165.08	976.705	1348.43	849.896	1389.69	2021.24	3558.65	649.259	1237.59	887.12	1117.84	2573.53	533.794	1212.65	2289.41	2469.34	1644.68	1077.31	2323.68	3121.47	1873.36	1513.97	3855.73	1278.14	1348.26	5510.13	2756.5	931.661	1915.59	1265.19
ENSG00000225465	RFPL1S	RFPL1 antisense RNA 1 [Source:HGNC Symbol;Acc:HGNC:9978]		19.1557	17.7912	20.8559	-2.06025	0.919716	-4.1706	0.000852915	0.0324974	lncRNA	22	29436534	29478868	-1	10.4763	14.8009	12.9474	35.1609	15.5422	22.0251	25.29	22.2548	5.22284	10.5172	34.5017	6.66089	9.74034	18.9598	13.0077	34.612	31.6857	9.28389	13.0167	5.0051	22.904	17.3977	18.7601	20.8814	19.7409	47.5258	31.1179	37.6477	20.7356	5.67765	14.4925	25.145	29.4231
ENSG00000124201	ZNFX1	zinc finger NFX1-type containing 1 [Source:HGNC Symbol;Acc:HGNC:29271]	57169	3747.23	2300.03	5538.33	1.5271	0.557156	2.88207	0.000862248	0.032789	protein_coding	20	49237946	49278426	-1	1782.88	1667.05	1993.25	1392.13	1228.24	2058.13	2674.61	1045.98	1220.4	4988.03	1968.16	3191.9	3086.19	907.699	3262.94	2032.11	1325.43	3396.05	3138.55	4495.58	1445.41	6413.23	5854.19	2414.79	3226.87	4574.75	1873.99	3515.35	11856.6	6364.65	4084.82	3556.88	3540.06
ENSG00000122779	TRIM24	tripartite motif containing 24 [Source:HGNC Symbol;Acc:HGNC:11812]	8805	1356.16	1253.77	1483.47	1.08061	0.394892	2.11493	0.000868072	0.0329462	protein_coding	7	138460259	138589996	1	1457.16	1529.16	1098.59	1191.9	1247.47	1456.11	1136.52	1120.65	1731.37	1365.33	1053.08	1294.88	1440.07	1424.35	1299.77	746.85	1394.71	1322.65	1222.04	631.643	1164.83	1158.03	1585.23	1197.7	742.56	777.278	1129.47	784.719	1886.94	1440.7	761.892	953.225	803.715
ENSG00000102053	ZC3H12B	zinc finger CCCH-type containing 12B [Source:HGNC Symbol;Acc:HGNC:17407]	340554	63.4604	50.5098	79.5231	-1.25219	0.56605	-2.38202	0.00087182	0.0330242	protein_coding	X	65366638	65507887	1	55.2388	41.2866	43.3737	40.5244	52.7617	36.7086	36.7854	42.5314	63.5446	26.7711	43.9112	70.6055	91.4093	56.0893	40.0238	79.223	37.0562	35.2788	98.0079	36.0367	33.538	67.4161	77.1248	47.729	147.297	82.787	102.574	92.9428	58.0596	35.4853	130.433	96.0082	142.47
ENSG00000220201	ZGLP1	zinc finger GATA like protein 1 [Source:HGNC Symbol;Acc:HGNC:37245]	100125288	17.6353	19.2624	15.639	-2.13975	0.997862	-4.40687	0.000878721	0.0331568	protein_coding	19	10304803	10309880	-1	8.57154	4.67396	20.7158	26.2217	38.0375	24.4724	26.8227	24.233	8.70473	11.4733	14.8984	29.974	13.4866	26.0697	12.0071	22.3055	39.2044	11.7596	4.59412	15.0153	21.268	15.223	4.16891	32.8137	3.03705	12.2647	24.2028	34.1182	16.5885	8.51648	14.4925	11.4296	17.0344
ENSG00000023445	BIRC3	baculoviral IAP repeat containing 3 [Source:HGNC Symbol;Acc:HGNC:591]	330	4165.94	2417.98	6328.98	1.61715	0.590569	3.06769	0.000881744	0.0332067	protein_coding	11	102317450	102339403	1	1400.02	1014.25	2083.88	1938.62	2312.11	882.637	3611.1	2342.2	1162.95	1576.63	3498.78	4843.14	1045.21	1836.73	2019.2	5798.66	3047.2	3586.68	4388.15	858.875	1530.48	4283.1	7076.72	2220.89	9267.57	7864.76	2552.82	5225.97	9213.5	6891.25	4310.49	1956.74	10518
ENSG00000241666		novel transcript		136.801	163.617	103.807	-1.40246	0.745198	-2.64351	0.000886984	0.0333397	lncRNA	1	167627385	167630674	-1	130.478	225.129	133.358	205.602	203.276	132.967	107.291	58.3571	534.471	62.1472	80.7653	107.906	255.497	205.397	122.073	59.225	131.039	183.821	129.401	159.162	208.59	55.4552	91.716	41.7629	197.409	98.1179	162.505	88.2368	165.885	112.134	132.503	75.435	238.482
ENSG00000261556	SMG1P7	SMG1 pseudogene 7 [Source:HGNC Symbol;Acc:HGNC:49864]	100506060;107984138	175.427	210.299	132.491	-1.13051	0.532706	-2.18937	0.000914053	0.0342252	transcribed_unprocessed_pseudogene	16	70219574	70246612	-1	263.813	163.589	152.779	178.188	240.086	151.729	168.6	240.352	232.416	129.075	175.645	237.128	154.347	196.708	206.123	477.645	181.522	186.297	232.003	201.205	247.036	235.956	88.5893	171.526	239.927	90.4524	162.505	141.179	42.8535	99.3589	120.081	118.867	277.196
ENSG00000204681	GABBR1	gamma-aminobutyric acid type B receptor subunit 1 [Source:HGNC Symbol;Acc:HGNC:4070]	2550	1858.21	1992.04	1694.18	-1.60253	1.1011	-3.03675	0.000919019	0.0343453	protein_coding	6	29555629	29633976	-1	1469.54	1668.6	2535.75	2738.97	2326.42	1992.87	3731.42	1787.31	224.582	862.413	3283.93	2233.4	1807.96	1331.92	1507.9	4465.72	2163.76	920.343	1458.63	1648.68	1672.81	1076.48	393.962	1246.92	3425.8	1871.91	1750.67	2810.64	1242.75	465.568	3163.51	2601.37	4932.24
ENSG00000140995	DEF8	differentially expressed in FDCP 8 homolog [Source:HGNC Symbol;Acc:HGNC:25969]	54849	1560.29	1769.39	1303.18	-1.18941	0.598448	-2.28059	0.000928131	0.0344747	protein_coding	16	89948697	89968060	1	1082.87	1393.62	1957	2944.58	1850.75	1564.6	1547.29	1695.32	647.632	1329	2349.25	1472.72	1571.94	1275.83	1720.02	2865.1	2007.48	1258.9	1320.04	2541.59	2761.57	1091.71	526.325	1269.29	2270.2	1404.31	1255.09	1740.03	783.804	694.093	1817.77	1716.72	3371.27
ENSG00000162711	NLRP3	NLR family pyrin domain containing 3 [Source:HGNC Symbol;Acc:HGNC:16400]	114548	4180.47	1655.35	7303.72	2.28346	0.810564	4.86846	0.000944578	0.0346362	protein_coding	1	247416156	247449108	1	936.203	1737.93	3361.79	780.691	884.269	2578.57	1944.26	983.168	1024.55	2826.27	1082.88	1208.95	1529.23	917.969	3702.2	1061.43	977.424	2260.94	1432.6	2499.55	1031.5	15823.2	1822.85	1457.23	397.854	9535.83	1454.47	2924.76	6273.2	29509.6	7898.42	8311.57	407.277
ENSG00000135185	TMEM243	transmembrane protein 243 [Source:HGNC Symbol;Acc:HGNC:21707]	79161	960.478	1132.82	748.426	-1.04223	0.478475	-2.05941	0.000948109	0.0346362	protein_coding	7	87196160	87220587	-1	2387.65	879.483	1308.33	924.911	1274.05	614.257	820.008	942.615	1187.33	453.197	889.986	1115.03	2094.92	1139.96	1081.64	988.365	925.868	1052.17	1097.23	1357.38	1254.81	590.435	656.603	616.002	964.265	929.054	774.491	1024.72	847.393	513.828	991.702	569.192	1684.86
ENSG00000159899	NPR2	natriuretic peptide receptor 2 [Source:HGNC Symbol;Acc:HGNC:7944]	4882	47.5904	51.2031	43.1673	-1.62418	0.890875	-3.08266	0.000947377	0.0346362	protein_coding	9	35791591	35809732	1	18.0955	31.9387	28.4842	51.2515	78.12	59.5494	82.7672	104.35	23.5028	20.0783	51.7525	27.9757	24.7255	49.7694	33.0196	195.365	57.464	25.9949	35.2216	30.0306	45.808	21.7471	26.0557	29.8306	48.5929	95.0517	47.2531	82.3544	48.383	15.6135	33.1257	34.2887	46.4575
ENSG00000136895	GARNL3	GTPase activating Rap/RanGAP domain like 3 [Source:HGNC Symbol;Acc:HGNC:25425]	84253	42.7907	37.022	49.9548	-1.38721	0.65284	-2.61572	0.000943575	0.0346362	protein_coding	9	127224265	127393660	1	24.7622	37.3917	27.1895	49.4636	40.0825	53.0235	41.3836	26.7058	25.2437	29.6395	72.924	13.3218	39.7106	50.5594	18.0107	55.3792	61.7603	23.5192	29.0961	28.0286	30.266	51.1058	19.8023	77.5596	69.8523	84.3201	89.8962	67.06	52.5301	31.2271	51.759	38.8605	88.2693
ENSG00000173581	CCDC106	coiled-coil domain containing 106 [Source:HGNC Symbol;Acc:HGNC:30181]	29903	147.339	140.655	155.733	-1.30067	0.665171	-2.46343	0.000946053	0.0346362	protein_coding	19	55641062	55653161	1	151.431	115.291	132.711	174.017	188.551	88.9163	95.7954	192.381	194.986	44.9372	128.597	87.2577	170.081	304.936	112.067	157.677	189.577	112.026	60.4893	139.142	112.884	97.8621	116.729	228.204	288.52	72.0553	210.91	198.827	111.972	99.3589	196.684	155.442	410.375
ENSG00000262580		novel transcript, antisense to CARD14		182.741	194.686	168.097	-1.34688	0.72118	-2.54362	0.000957911	0.0349288	lncRNA	17	80200673	80205949	-1	74.2867	209.549	192.916	148.987	126.792	121.546	174.731	231.45	82.695	150.11	587.312	174.515	116.884	134.298	178.106	527.641	332.969	144.829	140.121	142.145	96.5241	105.474	156.334	105.899	71.3708	196.236	137.149	284.711	217.032	218.59	300.202	233.163	193.573
ENSG00000101255	TRIB3	tribbles pseudokinase 3 [Source:HGNC Symbol;Acc:HGNC:16228]	57761	189.676	157.77	229.193	1.47269	0.548378	2.77539	0.000963711	0.0350095	protein_coding	20	362835	397559	1	129.526	170.6	159.9	126.937	124.747	136.23	124.151	82.0955	287.256	231.379	119.972	202.491	158.842	97.9588	192.114	87.6837	92.909	237.049	150.075	275.28	125.972	108.736	200.108	104.407	317.372	113.449	119.862	95.2957	228.091	256.914	105.588	315.456	52.6518
ENSG00000166881	NEMP1	nuclear envelope integral membrane protein 1 [Source:HGNC Symbol;Acc:HGNC:29001]	23306	1451.76	1446.57	1458.99	1.0503	0.389328	2.07096	0.000966124	0.0350319	protein_coding	12	57055643	57088063	-1	1360.02	1431.79	1067.51	1790.82	1944.41	1867.24	1377.15	2043.98	2661.04	761.065	1529.84	1336.84	747.758	1847.79	1203.72	1406.02	1640.14	1254.56	918.824	685.698	1501.85	795.945	911.948	1227.53	1366.67	697.557	1081.06	751.778	1516.46	1762.91	886.113	573.763	1232.67
ENSG00000101104	PABPC1L	poly(A) binding protein cytoplasmic 1 like [Source:HGNC Symbol;Acc:HGNC:15797]	80336	814.133	852.522	767.261	-1.38166	0.829397	-2.60568	0.00097169	0.0351683	protein_coding	20	44910060	44959035	1	726.676	913.759	943.864	1277.12	1169.76	1115.94	1137.28	878.323	275.94	212.257	1241.28	567.508	825.681	1186.57	367.218	1563.69	1224.47	312.558	522.198	525.535	915.343	558.901	286.612	1193.22	1615.71	449.196	1030.35	1124.73	510.095	268.269	1165.61	829.785	1941.92
ENSG00000206530	CFAP44	cilia and flagella associated protein 44 [Source:HGNC Symbol;Acc:HGNC:25631]	55779	288.318	367.631	190.51	-1.62936	1.14088	-3.09376	0.000981388	0.0353227	protein_coding	3	113286930	113441610	-1	494.292	359.895	225.932	437.426	603.283	340.982	459.051	467.351	41.7827	105.172	440.68	275.761	496.008	470.044	216.128	606.094	477.434	147.304	464.772	207.211	383.642	88.0759	35.4357	350.51	353.817	84.3201	192.47	347.065	23.5003	92.2619	314.694	194.302	664.342
ENSG00000172915	NBEA	neurobeachin [Source:HGNC Symbol;Acc:HGNC:7648]	26960	152.53	153.464	151.504	-1.63608	1.08253	-3.1082	0.000978139	0.0353227	protein_coding	13	34942287	35673022	1	319.052	164.368	180.616	160.31	179.144	86.4691	116.487	156.278	8.70473	76.4889	159.178	247.785	155.096	150.888	135.08	265.359	62.2974	92.22	308.572	105.107	93.2521	207.685	20.8445	158.102	164.001	165.574	224.741	257.651	308.269	38.3242	242.232	118.867	278.745
ENSG00000280721	LINC01943	long intergenic non-protein coding RNA 1943 [Source:HGNC Symbol;Acc:HGNC:52767]		15.9689	6.36876	27.8409	3.15595	1.07785	8.91327	0.00100922	0.0359923	lncRNA	2	87439523	87459044	-1	0.952394	3.11597	3.23685	2.38379	2.04503	2.44724	2.29909	2.96731	16.539	16.2539	0	6.66089	6.74331	1.57998	22.0131	2.30747	0	6.80819	5.35981	30.0306	0	27.1839	30.2246	11.9322	4.55558	32.1949	2.30503	1.17649	29.0298	18.4524	12.4222	2.28591	0
ENSG00000169026	SLC49A3	solute carrier family 49 member 3 [Source:HGNC Symbol;Acc:HGNC:26177]	84179	153.351	127.438	185.459	-1.23299	0.628411	-2.35053	0.00100602	0.0359923	protein_coding	4	681829	689271	-1	43.8101	149.567	137.242	116.806	85.0731	237.382	225.311	167.158	41.7827	92.7428	229.75	125.225	104.147	75.0491	99.0589	165.368	188.503	64.9872	95.7108	94.0959	137.424	106.561	179.263	134.238	139.705	251.427	266.231	220.004	172.796	212.912	252.584	416.036	72.7834
ENSG00000137103	TMEM8B	transmembrane protein 8B [Source:HGNC Symbol;Acc:HGNC:21427]	51754	261.975	267.989	254.731	-1.08562	0.515175	-2.12229	0.00101225	0.0359961	protein_coding	9	35814451	35865518	1	245.718	311.597	292.611	235.399	283.85	189.253	269.76	431.743	188.022	127.163	416.372	388.33	301.951	254.377	164.098	306.124	429.637	113.882	225.878	235.24	216.77	229.432	186.559	442.985	410.002	285.155	378.025	343.535	167.267	195.879	233.95	292.596	325.203
ENSG00000264290		novel transcript		49.8438	53.8148	44.9747	-1.43413	0.735461	-2.70218	0.00101301	0.0359961	lncRNA	17	29569580	29570519	1	76.1915	63.0985	57.6159	56.615	43.3546	50.5762	34.4863	15.8256	40.9123	43.025	54.1049	67.9411	71.1794	37.1295	94.0559	13.0756	31.1487	51.9898	132.464	56.0571	39.264	70.6782	78.167	26.8476	53.1485	93.5186	79.5236	28.2358	20.7356	39.7436	33.1257	34.2887	71.2348
ENSG00000130270	ATP8B3	ATPase phospholipid transporting 8B3 [Source:HGNC Symbol;Acc:HGNC:13535]	148229	184.031	226.358	131.843	-1.2224	0.625358	-2.33335	0.00103334	0.0365876	protein_coding	19	1782075	1812276	-1	160.955	271.09	278.369	303.337	240.086	411.136	191.591	296.731	118.384	152.978	295.617	204.489	184.317	293.876	99.0589	291.51	160.04	89.1254	159.263	265.27	286.3	205.51	75.0403	304.272	86.5561	53.6582	205.148	160.003	84.3246	119.231	115.94	315.456	106.852
ENSG00000138030	KHK	ketohexokinase [Source:HGNC Symbol;Acc:HGNC:6315]	3795	49.7766	64.7456	31.3089	-1.51787	0.842216	-2.86367	0.00104137	0.036736	protein_coding	2	27086747	27100762	1	91.4298	64.6564	59.558	80.4529	81.8011	84.0218	89.6645	87.5356	36.5599	9.56112	76.0605	41.2975	59.1913	95.5888	25.0149	82.2996	111.706	12.3785	32.9245	61.0622	76.8921	57.6299	17.7179	49.2205	36.4447	21.4633	67.9984	52.9421	22.1179	25.5494	16.5629	59.4337	20.1316
ENSG00000106133	NSUN5P2	NSUN5 pseudogene 2 [Source:HGNC Symbol;Acc:HGNC:16609]	260294	156.436	263.114	24.7135	-1.38228	0.768582	-2.60681	0.0010404	0.036736	transcribed_unprocessed_pseudogene	7	72947581	72954790	-1	214.289	199.422	204.569	345.054	375.876	306.72	270.526	295.247	150.592	79.3573	239.943	242.456	137.114	299.406	153.091	778.385	363.043	131.212	192.187	159.162	387.732	6.52414	8.33781	16.4068	41.0002	1.53309	20.7453	30.5888	6.91186	9.93589	26.9147	20.5732	34.0688
ENSG00000157933	SKI	SKI proto-oncogene [Source:HGNC Symbol;Acc:HGNC:10896]	6497	3492.76	1410.17	6069.2	1.66612	0.619471	3.17361	0.00104398	0.0367616	protein_coding	1	2228319	2310213	1	617.151	951.151	1128.36	1067.34	1367.3	808.404	1375.62	1144.39	1911.56	1516.39	1888.18	1869.71	702.054	900.589	1012.6	1995.96	1647.66	2292.5	3911.13	659.672	845.813	9520.9	12344.1	1839.06	2094.05	12911.7	2110.26	4245.95	11430.8	9077.15	3606.56	1908.73	2806.03
ENSG00000165923	AGBL2	ATP/GTP binding protein like 2 [Source:HGNC Symbol;Acc:HGNC:26296]	79841	60.8657	64.9372	55.8738	-1.67091	1.06272	-3.18416	0.00107608	0.037419	protein_coding	11	47659591	47715389	-1	34.2862	60.7615	46.6106	89.3921	94.4802	57.1022	101.926	54.4007	48.7465	14.3417	118.403	78.5985	25.4747	123.238	25.0149	153.831	107.946	19.1867	23.7363	33.0337	53.17	47.8437	38.5624	70.1019	165.519	21.4633	48.4057	77.6484	17.9708	19.8718	95.2365	50.29	156.407
ENSG00000184465	WDR27	WD repeat domain 27 [Source:HGNC Symbol;Acc:HGNC:21248]	253769	497.531	497.619	497.768	-1.57373	1.1646	-2.97674	0.0010906	0.0378565	protein_coding	6	169457212	169702067	-1	451.435	680.061	561.917	755.661	626.596	705.62	615.389	636.982	155.815	73.6206	821.767	530.873	401.602	573.533	176.105	827.611	678.29	89.1254	339.199	194.198	554.605	411.021	93.8004	747.257	1056.9	206.967	499.039	925.898	196.297	205.815	759.822	610.338	1410.76
ENSG00000162433	AK4	adenylate kinase 4 [Source:HGNC Symbol;Acc:HGNC:363]	205	140.228	83.5582	210.315	2.24937	0.817627	4.75475	0.00110635	0.0380067	protein_coding	1	65147549	65232145	1	20.0003	187.737	121.058	87.0083	77.302	71.7856	91.1972	99.4048	105.327	128.119	70.5716	51.2889	86.9138	94.7988	90.0535	26.9204	18.2596	83.555	98.0079	66.0673	79.3461	66.3288	43.7735	108.882	21.2594	33.728	86.4387	40.0007	529.448	187.363	26.9147	109.724	10.8401
ENSG00000188313	PLSCR1	phospholipid scramblase 1 [Source:HGNC Symbol;Acc:HGNC:9092]	5359	1974.25	1616.41	2417.33	1.50157	0.566844	2.8315	0.00110625	0.0380067	protein_coding	3	146515180	146544856	-1	688.581	1374.14	1055.86	1705.01	926.806	3403.29	3845.61	1707.69	2873.43	1259.2	1218.54	1338.17	764.242	786.04	3088.84	1375.25	1206.21	2304.26	648.537	864.881	1510.03	2008.35	719.137	1103.73	1984.72	2052.81	1354.21	1408.26	2074.94	2472.62	1354.01	2372.77	994.191
ENSG00000187260	WDR86	WD repeat domain 86 [Source:HGNC Symbol;Acc:HGNC:28020]	349136	104.951	90.8563	122.496	-1.39415	0.77214	-2.62834	0.0011052	0.0380067	protein_coding	7	151375909	151410727	-1	126.668	49.8556	66.679	29.7974	114.112	70.9699	40.6172	185.457	172.354	44.9372	60.3779	102.578	215.786	82.949	63.0375	60.7633	99.3536	38.9923	58.9579	123.125	100.614	209.86	132.363	49.2205	138.186	168.64	139.454	105.884	150.678	92.2619	161.488	84.5787	295.779
ENSG00000141458	NPC1	NPC intracellular cholesterol transporter 1 [Source:HGNC Symbol;Acc:HGNC:7897]	4864	1487	731.045	2422.15	1.25497	0.474612	2.38663	0.00110437	0.0380067	protein_coding	18	23506184	23586506	-1	431.434	489.208	594.285	563.17	810.648	659.123	1450.73	857.552	821.727	1416	844.507	512.889	445.059	513.494	815.485	643.783	916.201	1067.65	561.248	489.499	448.264	1950.72	4091.78	1839.06	2015.09	2537.27	907.03	1940.03	4741.53	1943.18	2291.89	1446.98	1523.81
ENSG00000181392	SYNE4	spectrin repeat containing nuclear envelope family member 4 [Source:HGNC Symbol;Acc:HGNC:26703]	163183	17.4517	18.5133	16.1547	-2.2669	1.12178	-4.81289	0.00110058	0.0380067	protein_coding	19	36003307	36008813	-1	13.3335	7.78993	8.4158	29.7974	32.7204	21.2094	26.0563	12.8583	6.96379	8.605	28.2286	10.6574	8.99108	16.5898	1.00059	69.224	6.9816	14.8542	15.3137	14.0143	35.174	14.1356	23.9712	20.8814	22.7779	10.7316	19.5928	32.9417	12.4413	14.1941	24.8443	9.14364	27.8745
ENSG00000100271	TTLL1	tubulin tyrosine ligase like 1 [Source:HGNC Symbol;Acc:HGNC:1312]	25809	65.396	76.8529	51.2789	-1.43384	0.799481	-2.70165	0.00110661	0.0380067	protein_coding	22	43039516	43089419	-1	50.4769	109.059	78.9791	109.654	108.795	78.3116	110.356	121.66	23.5028	30.5956	92.5272	53.2871	74.1764	127.188	35.0208	123.065	100.965	18.5678	48.2383	45.0459	74.4381	35.8828	22.929	93.9664	51.6299	76.6546	89.8962	90.5898	27.6474	55.3571	60.0404	64.0055	57.2976
ENSG00000186480	INSIG1	insulin induced gene 1 [Source:HGNC Symbol;Acc:HGNC:6083]	3638	2936.92	1469.45	4752.6	1.63478	0.613679	3.1054	0.0011103	0.0380663	protein_coding	7	155297776	155310235	1	1758.12	1328.96	2302.05	1118	1267.1	1453.66	1377.92	782.875	2371.17	2492.58	1026.42	1710.52	1547.96	1069.65	2012.2	686.087	1067.11	1861.73	1709.01	892.91	1022.5	2648.8	7159.06	1063.46	1541.31	9258.34	1713.79	1631.79	5955.25	4826	2151.1	1933.88	1669.37
ENSG00000198756	COLGALT2	collagen beta(1-O)galactosyltransferase 2 [Source:HGNC Symbol;Acc:HGNC:16790]	23127	72.8515	43.2734	109.442	1.69505	0.640236	3.23789	0.00111282	0.0380856	protein_coding	1	183929854	184037729	-1	15.2383	46.7396	73.8001	29.7974	36.4015	51.392	28.3554	52.917	72.2493	62.1472	61.9462	27.9757	26.9732	43.4495	45.0268	34.612	41.8896	27.8517	60.4893	40.0408	29.448	40.2322	211.572	79.0511	48.5929	110.383	50.7107	60.001	35.9416	68.1318	97.3068	52.5759	7.74292
ENSG00000267731		novel transcript		244.687	367.449	93.0979	-1.48635	0.960428	-2.8018	0.00111611	0.0381314	lncRNA	17	68189884	68192802	1	700.962	299.912	214.927	608.462	701.444	152.544	416.901	433.227	262.883	63.1034	380.302	251.116	340.912	767.871	432.257	118.45	382.377	299.56	238.894	295.301	355.012	31.5333	90.6737	55.1866	209.557	114.982	271.994	62.354	91.2365	49.6795	151.136	48.0041	109.949
ENSG00000169429	CXCL8	C-X-C motif chemokine ligand 8 [Source:HGNC Symbol;Acc:HGNC:6025]	3576	34972.8	4510.66	72641.9	4.13078	1.33265	17.5181	0.00112602	0.0381902	protein_coding	4	73740541	73743716	1	1918.12	4032.07	5168.6	676.996	55.6247	2335.48	59.0099	173.093	2825.56	16800.8	1048.38	1406.11	6042.76	110.599	22133.2	53.8409	290.005	2213.28	594.173	25367.8	1418.41	70074.7	35656.7	3036.76	976.413	21549.1	1160.58	8130.73	387837	171146	30637.2	18902.2	2082.84
ENSG00000164949	GEM	GTP binding protein overexpressed in skeletal muscle [Source:HGNC Symbol;Acc:HGNC:4234]	2669	193.338	32.9897	391.679	2.99671	1.03795	7.98179	0.00112536	0.0381902	protein_coding	8	94249253	94262350	-1	57.1436	31.9387	49.8474	8.93921	7.36209	30.9983	5.36454	3.95641	13.9276	71.7084	5.4889	35.9688	87.6631	4.73994	81.0482	0	15.0373	30.9463	79.6314	71.0724	0	175.064	279.317	113.356	31.8891	663.829	29.9654	182.356	2069.41	286.721	109.729	38.8605	156.407
ENSG00000123240	OPTN	optineurin [Source:HGNC Symbol;Acc:HGNC:17142]	10133	1328.88	1013.1	1719.98	1.04767	0.395389	2.06719	0.00112584	0.0381902	protein_coding	10	13099449	13138308	1	1025.73	840.534	845.464	685.34	766.067	1031.1	1528.89	939.648	1587.74	1696.14	1213.05	1246.92	851.156	641.472	612.364	1111.43	673.456	1456.33	1265.68	582.593	674.033	1251.55	1536.24	1299.12	2021.16	1776.85	990.011	1542.38	2401.18	1882.14	3888.13	907.506	1389.08
ENSG00000010295	IFFO1	intermediate filament family orphan 1 [Source:HGNC Symbol;Acc:HGNC:24970]	25900	1045.01	1070.38	1014.27	-1.3464	0.801615	-2.54276	0.0011213	0.0381902	protein_coding	12	6538961	6556073	-1	541.912	940.245	891.427	1527.41	1400.84	1658.41	1503.6	1646.86	372.563	177.837	1994.82	676.081	717.039	1367.47	422.251	2185.17	1512.32	380.64	584.219	598.61	1378.33	624.143	827.528	1260.34	1497.27	818.671	1211.29	1564.73	331.769	539.377	1480.31	1728.15	1257.45
ENSG00000139572	GPR84	G protein-coupled receptor 84 [Source:HGNC Symbol;Acc:HGNC:4535]	53831	370.55	117.967	682.958	2.47067	0.886161	5.54301	0.00112958	0.0381902	protein_coding	12	54362445	54364487	-1	37.1434	99.7111	135.3	148.391	70.3489	100.337	131.814	46.4878	96.6225	213.213	55.6731	85.9255	92.9079	25.2797	355.211	153.831	42.9637	160.921	61.2549	326.332	37.628	1321.14	431.482	193.899	4.55558	824.803	67.9984	98.8252	1262.1	1865.11	341.609	397.748	23.2288
ENSG00000090339	ICAM1	intercellular adhesion molecule 1 [Source:HGNC Symbol;Acc:HGNC:5344]	3383	2519.97	1037.3	4354	2.39202	0.8617	5.24891	0.00112918	0.0381902	protein_coding	19	10271093	10286615	1	886.679	658.249	1336.17	282.479	213.91	827.166	447.556	367.946	570.16	3616.01	422.645	1128.36	1582.43	188.018	2627.56	183.059	460.249	1557.84	846.084	3362.43	218.406	5351.97	2400.25	1044.07	434.299	3749.94	708.797	2017.68	6119.76	9989.83	3188.35	3707.75	294.231
ENSG00000159214	CCDC24	coiled-coil domain containing 24 [Source:HGNC Symbol;Acc:HGNC:28688]	149473	68.0928	65.8861	70.8576	-1.61972	1.01126	-3.07314	0.0011334	0.0381918	protein_coding	1	43991359	43996528	1	57.1436	56.0875	55.6738	109.058	78.938	45.6818	68.9727	103.361	17.4095	5.73667	84.6859	39.9654	77.9227	153.258	21.0125	75.3772	128.891	24.757	29.0961	54.0551	96.5241	33.7081	41.6891	104.407	271.816	26.0626	89.8962	58.8245	44.2359	49.6795	76.6033	93.7223	86.7207
ENSG00000092067	CEBPE	CCAAT enhancer binding protein epsilon [Source:HGNC Symbol;Acc:HGNC:1836]	1053	55.2685	54.4753	56.2475	2.14986	0.790368	4.43785	0.00113354	0.0381918	protein_coding	14	23117306	23119255	-1	13.3335	43.6236	19.4211	89.3921	60.1238	63.6282	42.15	47.9715	14.798	28.6833	62.7303	53.2871	11.2389	45.8194	169.101	116.912	52.0935	67.463	25.2677	49.05	67.8941	3.26207	6.25336	23.8645	3.03705	19.9302	26.5079	7.05894	53.9125	5.67765	14.4925	29.7168	4.64575
ENSG00000163686	ABHD6	abhydrolase domain containing 6, acylglycerol lipase [Source:HGNC Symbol;Acc:HGNC:21398]	57406	109.484	57.0995	174.291	1.6472	0.625312	3.13226	0.00115068	0.0385034	protein_coding	3	58237532	58295693	1	20.0003	21.8118	35.6053	54.2312	66.2589	52.2077	98.8608	115.23	57.4512	62.1472	103.505	24.6453	17.9822	56.0893	41.0244	116.142	85.9274	59.4169	29.0961	16.0163	65.4401	89.1633	342.893	129.763	110.853	285.155	56.4733	123.532	138.237	149.038	151.136	93.7223	144.018
ENSG00000198598	MMP17	matrix metallopeptidase 17 [Source:HGNC Symbol;Acc:HGNC:7163]	4326	333.982	270.763	412.37	-1.29515	0.733926	-2.45402	0.00115018	0.0385034	protein_coding	12	131828393	131851783	1	80.0011	186.179	272.542	418.355	408.596	303.457	255.199	358.055	138.405	158.715	457.931	193.832	128.123	434.495	95.0565	570.713	516.639	166.491	70.4432	143.146	329.654	486.048	601.365	261.018	432.78	466.06	379.178	412.948	246.062	259.753	509.308	448.038	636.468
ENSG00000204815	TTC25	tetratricopeptide repeat domain 25 [Source:HGNC Symbol;Acc:HGNC:25280]	83538	106.779	26.7704	205.739	1.52409	0.584483	2.87604	0.00115486	0.0385771	protein_coding	17	41930617	41966503	1	15.2383	35.8337	25.2474	26.2217	33.1294	36.7086	9.96272	51.9279	23.5028	29.6395	25.8762	9.99134	47.2032	38.7095	17.0101	3.84578	25.7782	34.0409	35.2216	6.00612	31.084	371.876	234.501	165.56	167.038	176.306	144.064	117.649	349.74	485.439	144.925	210.304	94.4636
ENSG00000259865		novel transcript		343.69	448.959	213.849	-1.0657	0.521868	-2.09319	0.00116486	0.0387913	lncRNA	1	247187281	247188526	-1	375.243	518.81	403.958	554.231	446.634	473.948	548.716	428.776	528.377	310.736	567.709	497.569	343.16	312.836	325.193	713.776	417.285	230.241	330.777	326.332	773.829	57.6299	187.601	238.645	356.854	144.111	228.198	248.24	147.914	102.198	331.257	244.592	495.547
ENSG00000186815	TPCN1	two pore segment channel 1 [Source:HGNC Symbol;Acc:HGNC:18182]	53373	1668.99	1646.34	1698.08	-1.09884	0.557539	-2.14182	0.00116525	0.0387913	protein_coding	12	113221050	113298585	1	1291.45	1981.76	2161.57	1704.41	1634.39	2037.73	1617.03	2934.67	754.7	795.485	2844.82	1502.03	1615.4	2042.12	946.563	2044.41	2318.97	891.254	1280.99	1118.14	1055.22	2335.64	854.626	2337.23	2346.12	1292.4	2173.64	2607.1	713.303	1207.92	1869.53	3108.84	2420.44
ENSG00000140519	RHCG	Rh family C glycoprotein [Source:HGNC Symbol;Acc:HGNC:18140]	51458	25.136	0.142716	56.0406	7.67346	2.15366	204.146	0.00116782	0.0388105	protein_coding	15	89471398	89496589	-1	0	0	0	0	0	0	0	0	0	0	0	0	2.99703	0	0	0	0	0	0	0	0	16.3104	0	1.49153	0	3.06618	4.61006	9.41193	521.154	126.328	43.4775	0	0
ENSG00000175040	CHST2	carbohydrate sulfotransferase 2 [Source:HGNC Symbol;Acc:HGNC:1970]	9435	1471.65	787.419	2318.07	1.25926	0.479738	2.39374	0.00117197	0.0388162	protein_coding	3	143119771	143124014	1	502.864	789.899	958.754	500	573.425	939.739	1489.81	838.759	1103.76	574.623	632.792	706.055	433.82	597.233	1496.89	716.084	822.755	1406.2	513.01	292.298	647.039	1129.76	2249.13	1170.85	2025.72	2051.28	2113.71	2990.64	2627.89	3595.37	2200.79	1286.97	1093.3
ENSG00000006451	RALA	RAS like proto-oncogene A [Source:HGNC Symbol;Acc:HGNC:9839]	5898	1114.88	693.411	1636.38	1.65258	0.625662	3.14396	0.00117577	0.0388363	protein_coding	7	39623565	39708120	1	346.671	597.488	542.495	718.713	948.074	830.429	1007	838.759	860.028	596.614	700.227	490.242	375.378	1004.87	661.393	849.147	877.534	831.837	475.491	370.377	638.859	1048.21	1560.21	596.612	599.818	2218.38	638.494	527.068	2904.36	1335.67	527.941	518.902	515.678
ENSG00000100024	UPB1	beta-ureidopropionase 1 [Source:HGNC Symbol;Acc:HGNC:16297]	51733	233.624	94.4678	405.778	2.38428	0.865025	5.22084	0.00118023	0.0388916	protein_coding	22	24494107	24528390	1	32.3814	81.0153	61.5001	101.907	24.5403	47.3133	14.5609	28.684	80.0836	266.755	63.5144	93.2525	77.9227	47.3994	195.116	79.9922	58.001	162.778	54.3638	159.162	253.58	561.076	247.008	85.0173	24.2964	203.901	51.8632	64.707	1737.64	1063.14	142.855	123.439	236.933
ENSG00000283674		novel transcript	729732	37.9689	46.2854	27.7272	-1.49931	0.819913	-2.82707	0.00118338	0.0389297	lncRNA	8	12467693	12665588	-1	79.0487	102.827	71.2106	76.2813	40.0825	35.8928	14.5609	49.9497	45.2646	18.1661	32.1493	43.2958	71.9287	48.9794	12.0071	48.4568	22.5559	31.5652	26.799	69.0704	31.902	46.7563	29.1824	37.2883	28.852	18.3971	51.8632	40.0007	30.4122	17.033	26.9147	2.28591	51.1033
ENSG00000166321	NUDT13	nudix hydrolase 13 [Source:HGNC Symbol;Acc:HGNC:18827]	25961	107.089	70.7063	152.139	-1.30875	0.693409	-2.47727	0.00118543	0.0389316	protein_coding	10	73110375	73131828	1	40.0005	46.7396	53.0843	114.422	85.8911	106.863	75.8699	121.165	45.2646	38.2445	101.937	42.6297	56.9435	137.458	23.0137	131.526	106.872	21.0435	27.5647	42.0428	66.2581	197.899	199.065	176.001	124.519	68.9891	89.8962	198.827	149.296	228.526	165.629	166.871	205.962
ENSG00000136842	TMOD1	tropomodulin 1 [Source:HGNC Symbol;Acc:HGNC:11871]	7111	382.054	284.298	503.047	1.81444	0.683198	3.51722	0.00118863	0.0389711	protein_coding	9	97501180	97601743	1	270.48	341.978	246	206.794	194.687	463.344	167.833	370.914	826.95	479.968	110.562	289.083	143.857	169.058	121.072	97.6827	169.17	365.166	512.244	110.112	313.294	389.274	164.672	317.696	589.189	47.5258	245.486	191.768	528.066	669.963	1250.5	118.867	88.2693
ENSG00000188290	HES4	hes family bHLH transcription factor 4 [Source:HGNC Symbol;Acc:HGNC:24149]	57801	217.973	24.7458	457.046	2.6218	0.941142	6.15519	0.00121426	0.0396118	protein_coding	1	998962	1000172	-1	40.9529	14.8009	47.258	2.97974	13.9062	39.9715	55.9445	10.8801	19.1504	42.0689	6.27303	30.6401	17.9822	0.78999	14.0083	0.769155	37.5932	14.8542	37.5186	50.051	21.268	377.313	266.81	220.747	135.149	2879.15	18.4403	409.419	1197.13	129.167	341.609	118.867	99.1093
ENSG00000163462	TRIM46	tripartite motif containing 46 [Source:HGNC Symbol;Acc:HGNC:19019]	80128	57.8975	50.6634	66.8761	-1.69637	1.15415	-3.24085	0.00122836	0.0396713	protein_coding	1	155173787	155184971	1	26.667	44.4026	39.4895	67.938	70.7579	41.603	83.5336	57.368	26.1142	14.3417	118.403	9.32525	32.218	71.0991	4.00238	134.602	73.5754	14.8542	21.4392	32.0326	80.1641	27.1839	70.8714	59.6612	130.593	75.1215	72.6085	94.1193	47.0006	45.4212	124.222	116.581	111.498
ENSG00000013016	EHD3	EH domain containing 3 [Source:HGNC Symbol;Acc:HGNC:3244]	30845	290.556	228.622	367.293	-1.2231	0.671171	-2.33448	0.00124125	0.0396713	protein_coding	2	31234152	31269451	1	116.192	156.578	158.605	191.895	277.715	566.128	213.049	340.251	147.98	226.598	223.477	237.128	206.795	244.897	167.099	274.588	397.951	190.01	170.748	61.0622	232.312	471.913	521.113	268.476	768.375	173.239	215.52	578.833	80.1775	398.855	565.208	400.034	586.913
ENSG00000157087	ATP2B2	ATPase plasma membrane Ca2+ transporting 2 [Source:HGNC Symbol;Acc:HGNC:815]	491	10.3428	1.08622	21.7912	2.94928	1.10165	7.72361	0.00124744	0.0396713	protein_coding	3	10324023	10708007	-1	0	4.67396	1.29474	0	0.409005	0	0	0.989103	3.48189	4.78056	0.784129	0	2.24777	0	2.00119	0	2.14819	0	0	0	0	13.0483	8.33781	11.9322	4.55558	38.3273	25.3553	41.1772	29.0298	9.93589	8.28143	2.28591	3.09717
ENSG00000181804	SLC9A9	solute carrier family 9 member A9 [Source:HGNC Symbol;Acc:HGNC:20653]	285195	209.055	208.976	209.272	-1.27207	0.71918	-2.41508	0.00124704	0.0396713	protein_coding	3	143265222	143848485	-1	135.24	244.604	279.016	112.634	200.822	404.61	397.742	299.204	76.6017	70.7523	282.286	271.764	171.58	168.268	166.099	202.288	244.356	196.2	168.451	102.104	193.866	258.791	77.1248	173.018	209.557	157.908	164.81	383.536	73.2657	144.78	397.509	448.038	311.265
ENSG00000240137	ERICH6-AS1	ERICH6 antisense RNA 1 [Source:HGNC Symbol;Acc:HGNC:41205]	101928085	50.1935	47.0543	54.1105	-1.07362	0.485294	-2.10471	0.0012375	0.0396713	lncRNA	3	150703564	150723005	1	42.8577	49.0766	47.9053	52.4434	49.4896	49.7605	97.3281	41.5423	62.6741	20.0783	64.2986	49.9567	35.9643	41.8695	19.0113	62.3016	42.4267	40.2302	50.5353	34.0347	34.356	45.669	71.9137	37.2883	69.8523	41.3935	71.456	56.4716	45.6182	32.6465	89.0254	52.5759	78.9778
ENSG00000181359	HSP90AA6P	heat shock protein 90 alpha family class A member 6, pseudogene [Source:HGNC Symbol;Acc:HGNC:32536]		198.088	283.061	93.2168	-1.39943	0.886986	-2.63797	0.00126945	0.0396713	transcribed_processed_pseudogene	4	170581470	170605450	-1	281.909	401.182	219.458	156.734	404.915	292.037	357.125	181.006	284.645	286.833	111.346	402.984	249.503	353.126	232.138	146.14	343.173	82.3172	486.977	268.273	402.456	206.598	55.238	119.322	56.1855	130.313	111.794	35.2947	110.59	55.3571	70.3922	105.152	37.166
ENSG00000164296	TIGD6	tigger transposable element derived 6 [Source:HGNC Symbol;Acc:HGNC:18332]	81789	68.4914	60.0842	78.9195	1.11741	0.434245	2.16957	0.00126744	0.0396713	protein_coding	5	149993118	150000654	-1	40.9529	63.0985	42.7264	54.8272	59.7148	58.7337	75.1036	77.6446	128.83	78.4011	44.6953	54.6193	17.2329	88.4789	67.0399	59.225	51.0194	86.0307	50.5353	44.0449	18.814	42.4069	82.3359	47.729	51.6299	61.3237	71.456	62.354	94.0012	79.4871	41.4072	96.0082	30.9717
ENSG00000204580	DDR1	discoidin domain receptor tyrosine kinase 1 [Source:HGNC Symbol;Acc:HGNC:2730]	780	335.74	441.521	205.314	-1.335	0.804512	-2.52275	0.00124078	0.0396713	protein_coding	6	30876421	30900156	1	1145.73	253.952	373.532	295.59	410.232	128.072	328.003	406.027	417.827	208.432	297.185	338.373	855.651	406.845	1035.62	366.118	225.022	381.259	348.387	544.555	505.524	47.8437	179.263	92.4749	308.261	217.699	446.024	205.886	197.679	117.811	283.639	155.442	421.215
ENSG00000146828	SLC12A9	solute carrier family 12 member 9 [Source:HGNC Symbol;Acc:HGNC:17435]	56996	1626.92	1617.43	1639.64	-1.28863	0.766634	-2.44295	0.00122934	0.0396713	protein_coding	7	100826820	100867010	1	861.916	1328.96	1407.38	1977.95	1712.51	1634.75	2713.69	2183.44	403.9	640.595	3037.71	1308.2	1342.67	1530.21	1046.62	2811.26	2337.23	1535.56	969.359	1275.3	1906.76	1121.06	920.286	2255.19	2475.2	1013.37	2502.11	2729.46	405.035	1017.72	2403.69	3604.88	2380.17
ENSG00000106479	ZNF862	zinc finger protein 862 [Source:HGNC Symbol;Acc:HGNC:34519]	643641	609.567	733.554	456.766	-1.39407	0.909381	-2.62818	0.0012434	0.0396713	protein_coding	7	149838375	149867479	1	469.53	543.737	612.411	873.659	870.772	748.855	1010.07	1071.2	251.567	226.598	1326.75	788.65	651.853	864.249	282.168	1732.14	874.849	316.271	652.365	403.411	833.543	275.101	286.612	417.629	657.522	323.482	648.866	803.543	138.237	224.267	981.35	605.766	1068.52
ENSG00000178460	MCMDC2	minichromosome maintenance domain containing 2 [Source:HGNC Symbol;Acc:HGNC:26368]	157777	18.6856	18.1979	19.3019	-1.9022	0.9231	-3.73782	0.00123286	0.0396713	protein_coding	8	66870749	66922048	1	8.57154	12.4639	11.0053	28.6055	20.4503	23.6566	17.6263	21.2657	10.4457	15.2978	29.0128	10.6574	15.7344	41.0795	6.00357	37.6886	33.2969	6.18926	3.82843	8.00816	21.268	26.0966	19.8023	19.3899	31.8891	18.3971	27.6604	20.0003	20.7356	12.7747	18.6332	34.2887	34.0688
ENSG00000106804	C5	complement C5 [Source:HGNC Symbol;Acc:HGNC:1331]	727	211.17	267.961	141.098	-1.46173	0.987236	-2.75438	0.00126103	0.0396713	protein_coding	9	120952335	121050275	-1	189.526	380.928	309.443	294.994	321.478	432.345	323.405	337.779	94.0111	127.163	368.54	209.818	301.951	478.734	139.083	295.356	293.764	90.3632	130.167	221.225	287.118	182.676	23.9712	158.102	293.076	76.6546	236.266	185.886	66.3538	70.9707	173.91	413.75	199.767
ENSG00000237840	FAM21FP	family with sequence similarity 21 member F, pseudogene [Source:HGNC Symbol;Acc:HGNC:45011]		31.76	36.9189	25.4093	-1.28755	0.623983	-2.44113	0.00123625	0.0396713	transcribed_unprocessed_pseudogene	10	45706431	45727231	-1	29.5242	27.2648	36.2527	35.7569	30.2664	41.603	57.4772	33.6295	44.3941	16.2539	44.6953	21.3149	75.6749	45.8194	46.0274	51.5334	21.4819	22.2813	36.753	27.0275	30.266	7.6115	14.5912	22.373	53.1485	13.7978	36.8805	45.8831	23.5003	19.8718	20.7036	32.0027	17.0344
ENSG00000198682	PAPSS2	3'-phosphoadenosine 5'-phosphosulfate synthase 2 [Source:HGNC Symbol;Acc:HGNC:8604]	9060	161.235	70.5235	273.452	1.39734	0.542382	2.63416	0.00126045	0.0396713	protein_coding	10	87659613	87747705	1	39.0481	81.7943	60.2053	37.5447	49.4896	109.31	86.599	71.2154	119.255	111.865	58.0255	39.9654	53.9465	44.2395	110.065	119.219	100.965	82.3172	39.8157	26.0265	40.082	108.736	475.255	107.39	147.297	371.008	110.642	269.416	486.595	256.914	130.433	288.025	162.601
ENSG00000150510	FAM124A	family with sequence similarity 124 member A [Source:HGNC Symbol;Acc:HGNC:26413]	220108	33.2711	11.9273	59.6645	2.83563	1.01035	7.13855	0.00125678	0.0396713	protein_coding	13	51222334	51284239	1	8.57154	8.56893	8.4158	0	6.13508	8.9732	6.89727	19.7821	12.1866	37.2883	4.70477	17.9844	11.2389	7.10991	24.0143	12.3065	11.815	6.80819	16.8451	11.0112	9.81601	63.0667	40.6468	0	0	75.1215	27.6604	10.5884	99.5307	45.4212	14.4925	20.5732	7.74292
ENSG00000089723	OTUB2	OTU deubiquitinase, ubiquitin aldehyde binding 2 [Source:HGNC Symbol;Acc:HGNC:20351]	78990	62.1483	7.90533	129.224	2.16647	0.817139	4.48923	0.001271	0.0396713	protein_coding	14	94026340	94048930	1	0	2.33698	3.23685	12.5149	5.31707	4.07873	14.5609	13.3529	11.3162	6.69278	18.8191	0	0	6.31992	16.0095	16.9214	4.83342	14.8542	2.29706	6.00612	6.54401	144.618	145.912	159.594	129.075	27.5957	26.5079	307.064	142.384	126.328	196.684	166.871	71.2348
ENSG00000261971	MMP25-AS1	MMP25 antisense RNA 1 [Source:HGNC Symbol;Acc:HGNC:51372]		298.435	311.075	283.007	-1.45583	1.01834	-2.74314	0.00125878	0.0396713	lncRNA	16	3037400	3059370	-1	157.145	308.481	259.595	426.103	353.79	439.687	465.182	261.618	75.7312	83.1817	714.341	307.067	137.114	181.698	116.069	825.304	339.95	157.207	257.271	144.147	521.884	123.959	178.221	378.849	425.188	131.846	239.723	676.482	194.914	157.555	658.374	374.889	630.273
ENSG00000205710	C17orf107	chromosome 17 open reading frame 107 [Source:HGNC Symbol;Acc:HGNC:37238]	100130311	119.78	42.3381	215.592	2.57757	0.932001	5.96934	0.00126683	0.0396713	protein_coding	17	4899418	4902934	1	22.8575	27.2648	126.884	14.3027	6.13508	67.7069	5.36454	3.46186	107.939	83.1817	7.84129	33.3045	9.74034	9.47988	62.0369	23.8438	14.5003	32.1842	42.8785	188.192	0	249.005	109.434	152.136	56.1855	338.813	25.3553	281.181	299.975	315.11	345.75	162.3	167.247
ENSG00000197561	ELANE	elastase, neutrophil expressed [Source:HGNC Symbol;Acc:HGNC:3309]	1991	2909.19	2607.86	3281.8	2.4294	0.881353	5.38669	0.00122107	0.0396713	protein_coding	19	851014	856247	1	979.061	4122.43	2767.5	2319.43	1193.48	5866.03	1440.76	2237.85	1840.18	5384.82	1015.45	1893.03	1380.88	4396.3	1370.81	1904.43	652.511	3103.91	2103.34	6591.71	2201.24	1497.29	578.436	1051.53	156.408	55.1913	3586.63	542.362	644.185	1276.05	68.3218	2299.63	57.2976
ENSG00000169136	ATF5	activating transcription factor 5 [Source:HGNC Symbol;Acc:HGNC:790]	22809	777.03	369.243	1281.51	1.72317	0.65737	3.30162	0.00124435	0.0396713	protein_coding	19	49928702	49933935	1	533.341	427.667	446.037	253.874	211.047	435.608	473.612	280.905	392.584	387.225	215.635	345.034	548.456	228.307	593.353	103.067	277.116	456.149	413.471	556.567	175.052	754.626	727.474	778.579	616.522	1422.71	395.313	681.188	1345.05	860.164	685.289	505.186	298.877
ENSG00000184979	USP18	ubiquitin specific peptidase 18 [Source:HGNC Symbol;Acc:HGNC:12616]	11274	127.614	49.9069	223.679	2.66741	0.956085	6.35287	0.00125193	0.0396713	protein_coding	22	18150170	18177397	1	29.5242	52.1926	20.0684	26.8176	21.2683	280.617	203.853	33.1349	6.96379	47.8056	34.5017	108.573	29.221	33.1796	11.0065	27.6896	16.1114	12.9974	19.1422	17.0173	16.36	221.821	105.265	138.712	309.78	70.5222	51.8632	151.767	142.384	56.7765	200.825	41.1464	178.087
ENSG00000099904	ZDHHC8	zinc finger DHHC-type palmitoyltransferase 8 [Source:HGNC Symbol;Acc:HGNC:18474]	29801	769.233	697.432	858.545	-1.20111	0.667688	-2.29917	0.00125963	0.0396713	protein_coding	22	20129456	20148007	1	757.153	775.877	807.917	811.681	846.641	823.903	906.607	886.731	218.489	252.413	979.377	538.2	893.114	950.358	300.178	1042.21	869.478	333.601	517.604	572.583	561.967	694.821	354.357	1285.7	1305.93	729.752	1429.12	1431.79	387.064	428.663	1325.03	1072.09	1413.86
ENSG00000100003	SEC14L2	SEC14 like lipid binding 2 [Source:HGNC Symbol;Acc:HGNC:10699]	23541	366.802	146.784	639.037	1.5338	0.590654	2.89548	0.00126825	0.0396713	protein_coding	22	30396941	30425303	1	108.573	149.567	121.058	79.857	89.1631	99.521	75.1036	147.376	152.333	92.7428	61.9462	427.629	108.642	91.6389	223.133	163.061	70.8901	312.558	307.806	73.0744	126.79	465.389	737.897	247.594	271.816	1563.75	473.684	555.304	866.747	1053.2	699.781	139.441	686.022
ENSG00000131979	GCH1	GTP cyclohydrolase 1 [Source:HGNC Symbol;Acc:HGNC:4193]	2643	1452.11	917.205	2114.12	1.47672	0.569146	2.78315	0.00127537	0.0397444	protein_coding	14	54842008	54902826	-1	872.393	747.834	1140.02	506.555	629.05	1691.86	2478.42	719.572	547.528	811.739	845.291	933.191	1224.29	345.226	592.352	714.545	644.456	677.105	760.327	1829.86	549.696	2197.55	1726.97	1129.09	1245.19	1507.03	716.865	988.252	4415.29	3293.04	2053.8	1472.13	809.909
ENSG00000115884	SDC1	syndecan 1 [Source:HGNC Symbol;Acc:HGNC:10658]	6382	52.047	40.7731	66.0125	-1.56168	0.905918	-2.95197	0.0012906	0.0400909	protein_coding	2	20200797	20225433	-1	41.9053	29.6017	23.3053	64.3623	87.1181	39.1558	41.3836	20.2766	43.5237	30.5956	72.924	9.99134	21.7284	30.8096	47.028	21.5363	36.5192	34.6599	64.3177	48.0489	47.444	60.892	16.6756	52.2036	101.741	64.3899	106.031	101.178	33.1769	70.9707	178.051	61.7196	38.7146
ENSG00000135077	HAVCR2	hepatitis A virus cellular receptor 2 [Source:HGNC Symbol;Acc:HGNC:18437]	84868	871.442	406.304	1446.86	1.73522	0.663769	3.32929	0.00130418	0.0404482	protein_coding	5	157085832	157142869	-1	146.669	272.648	285.49	178.784	248.266	332.824	806.98	482.682	913.127	953.243	333.255	311.064	181.32	236.207	738.439	453.802	300.746	523.612	379.015	256.261	197.956	1548.4	2826.52	607.053	516.299	2793.29	402.228	874.133	2175.85	1491.8	517.59	770.352	295.779
ENSG00000170379	TCAF2	TRPM8 channel associated factor 2 [Source:HGNC Symbol;Acc:HGNC:26878]	285966	271.118	160.625	407.826	2.13962	0.799369	4.40645	0.00130919	0.0405029	protein_coding	7	143620952	143730409	1	90.4774	61.5405	105.521	57.8069	75.666	39.9715	107.291	35.6077	195.857	345.156	128.597	401.652	67.4331	30.8096	364.217	156.139	34.908	473.479	483.914	90.0918	26.994	442.554	766.037	79.0511	205.001	591.773	200.538	258.828	579.213	430.082	188.403	57.1478	263.259
ENSG00000169314	C22orf15	chromosome 22 open reading frame 15 [Source:HGNC Symbol;Acc:HGNC:15558]	150248	18.1242	17.2374	19.2326	-2.38104	1.2387	-5.20912	0.00132658	0.0407543	protein_coding	22	23762990	23765863	1	2.85718	10.1269	11.6526	19.0703	36.4015	7.34171	26.0563	26.7058	1.74095	14.3417	26.6604	7.99307	17.2329	13.4298	7.00416	59.225	31.1487	9.28389	12.251	10.0102	11.452	6.52414	36.4779	5.96612	21.2594	16.864	26.5079	17.6474	22.1179	41.163	4.14072	48.0041	20.1316
ENSG00000244480		pseudogene similar golgi autoantigen, golgin subfamily a, 8A GOLGA8A		63.3374	71.4588	53.3506	-1.47871	0.92489	-2.78699	0.00133275	0.0408793	transcribed_processed_pseudogene	7	30523143	30524535	-1	45.7149	43.6236	60.8527	126.937	60.5328	68.5226	71.2718	96.4375	47.0056	72.6645	94.0954	69.2733	53.9465	52.9294	65.0387	153.831	84.3163	41.4681	45.9412	66.0673	80.1641	30.446	19.8023	58.1697	109.334	50.592	81.8286	96.4722	12.4413	22.7106	86.9551	93.7223	117.692
ENSG00000140464	PML	PML nuclear body scaffold [Source:HGNC Symbol;Acc:HGNC:9113]	5371	2350.31	1897.21	2911.82	1.00735	0.387908	2.01022	0.00134365	0.0411491	protein_coding	15	73994673	74047827	1	1834.31	2054.21	1529.73	1533.37	1261.37	2828.19	2814.08	1465.85	1739.21	2270.76	1300.87	2728.3	2091.93	1390.38	2376.41	1547.54	1220.71	1930.43	1787.11	2420.47	1716.17	4347.25	1952.09	2259.67	3000.61	1562.22	1831.35	1917.68	3284.51	2513.78	2231.85	1719	2691.44
ENSG00000214425	LRRC37A4P	leucine rich repeat containing 37 member A4, pseudogene [Source:HGNC Symbol;Acc:HGNC:25479]		485.339	570.566	380.332	-1.22666	0.711881	-2.34024	0.00134618	0.0411578	transcribed_unprocessed_pseudogene	17	45506741	45551537	-1	967.632	680.84	626.653	1022.05	850.322	675.438	794.718	474.769	316.852	438.855	790.402	453.607	599.406	729.951	498.296	455.34	89.6867	489.571	372.124	345.352	310.022	277.276	511.733	387.798	385.706	229.964	257.011	607.069	277.857	394.597	710.133	322.313	1045.29
ENSG00000165685	TMEM52B	transmembrane protein 52B [Source:HGNC Symbol;Acc:HGNC:26438]	120939	84.0371	19.8526	163.433	2.18842	0.823306	4.55805	0.00135298	0.0411762	protein_coding	12	10170542	10191801	1	3.80958	19.4748	55.0264	7.74732	20.8593	43.2345	10.7291	4.45096	10.4457	31.5517	8.62542	5.9948	23.227	11.0599	48.0286	26.1513	9.66683	20.4246	14.548	32.0326	9.81601	213.122	86.5048	32.8137	31.8891	256.026	4.61006	62.354	333.151	425.824	182.192	38.8605	37.166
ENSG00000133460	SLC2A11	solute carrier family 2 member 11 [Source:HGNC Symbol;Acc:HGNC:14239]	66035	300.734	335.86	257.566	-1.17843	0.652981	-2.2633	0.00135695	0.0412328	protein_coding	22	23856703	23886309	1	356.195	273.427	391.658	598.927	336.611	341.798	251.367	321.458	140.146	128.119	367.756	263.771	411.342	552.203	177.105	563.022	381.303	203.008	324.651	416.424	252.762	127.221	191.77	352.001	701.56	194.703	296.197	351.771	139.619	109.295	258.795	208.018	532.713
ENSG00000188157	AGRN	agrin [Source:HGNC Symbol;Acc:HGNC:329]	375790	847.097	385.874	1417.8	1.53331	0.596688	2.89449	0.00137464	0.0415759	protein_coding	1	1020120	1056118	1	376.196	514.136	306.206	245.53	313.298	595.494	416.135	409.983	761.664	777.319	183.486	385.666	423.33	237.787	320.19	290.741	249.727	266.757	408.877	411.419	209.408	1158.03	1197.52	726.375	788.116	2005.28	628.121	734.13	3034.3	1628.07	813.651	221.733	882.693
ENSG00000236200	KDM4A-AS1	KDM4A antisense RNA 1 [Source:HGNC Symbol;Acc:HGNC:40528]		62.0482	15.0793	120.152	-3.04084	1.39033	-8.2297	0.00137923	0.0416503	lncRNA	1	43685123	43708138	-1	5.71436	16.3589	11.0053	38.1406	32.7204	26.9196	16.0936	23.2439	8.70473	0	10.1937	3.99654	2.99703	45.0294	9.00535	14.614	30.0746	0.618926	4.59412	6.00612	10.634	163.104	220.952	137.221	147.297	75.1215	44.9481	141.179	134.09	146.2	120.081	66.2914	204.413
ENSG00000165795	NDRG2	NDRG family member 2 [Source:HGNC Symbol;Acc:HGNC:14460]	57447	171.391	197.109	139.724	-1.17688	0.645947	-2.26087	0.00139587	0.0420225	protein_coding	14	21016763	21070872	-1	131.43	164.368	210.395	210.965	263.399	234.119	163.235	277.443	144.499	130.031	310.515	133.884	143.857	214.087	97.0577	341.505	263.153	221.576	126.338	125.127	232.312	133.745	70.8714	226.713	127.556	98.1179	274.299	244.71	59.442	86.5842	236.021	178.301	111.498
ENSG00000143554	SLC27A3	solute carrier family 27 member 3 [Source:HGNC Symbol;Acc:HGNC:10997]	11000	583.37	654.718	495.519	-1.20063	0.688717	-2.2984	0.00140914	0.0422267	protein_coding	1	153774354	153780157	1	283.813	662.144	577.453	766.389	633.14	966.659	1091.3	790.293	241.992	562.194	897.827	486.245	390.363	586.173	837.498	856.07	676.678	433.248	378.249	712.726	918.615	393.623	397.088	708.477	516.299	475.258	781.406	765.895	95.3836	303.754	826.073	1133.81	314.362
ENSG00000131378	RFTN1	raftlin, lipid raft linker 1 [Source:HGNC Symbol;Acc:HGNC:30278]	23180	1709.1	1208.66	2328.82	1.20704	0.472611	2.30863	0.00140891	0.0422267	protein_coding	3	16313574	16514026	-1	1711.45	884.157	1073.34	775.328	809.421	726.83	1115.82	1159.72	1837.57	1734.39	985.65	1495.37	1243.77	840.55	1663.99	1006.82	962.387	2305.5	1765.67	790.806	493.254	1816.97	3871.87	890.444	1141.93	3576.7	1364.58	1692.97	2489.65	2482.55	1556.91	1316.68	2203.63
ENSG00000215045	GRID2IP	Grid2 interacting protein [Source:HGNC Symbol;Acc:HGNC:18464]	392862	40.9132	44.1957	36.8902	-1.64442	1.08657	-3.12623	0.00141369	0.042298	protein_coding	7	6497462	6551436	-1	104.763	33.4967	50.4948	29.7974	68.7129	47.3133	22.9909	64.2917	43.5237	17.21	39.2064	35.3027	57.6928	120.869	19.0113	35.3811	41.3526	5.57034	19.9079	45.0459	26.176	33.7081	54.1958	16.4068	91.1116	19.9302	58.7783	56.4716	35.9416	22.7106	62.1108	18.2873	99.1093
ENSG00000226312	CFLAR-AS1	CFLAR antisense RNA 1 [Source:HGNC Symbol;Acc:HGNC:14437]	65072	128.858	2.68913	284.885	1.99665	0.811536	3.99072	0.00142012	0.0424253	lncRNA	2	201140278	201157823	-1	0	1.55799	4.53158	0	0.818011	0.815746	1.53273	4.94551	2.61142	3.82445	3.13651	3.99654	3.74628	0	2.00119	1.53831	0	3.09463	0.765687	11.0112	6.54401	318.596	491.931	146.17	209.557	121.114	69.1509	275.299	440.976	552.152	422.353	205.732	173.441
ENSG00000152413	HOMER1	homer scaffold protein 1 [Source:HGNC Symbol;Acc:HGNC:17512]	9456	46.1297	21.2899	76.8694	1.81464	0.707663	3.51772	0.00143078	0.0426782	protein_coding	5	79372636	79514134	-1	6.66676	14.8009	16.8316	24.4338	36.8105	34.2613	29.8882	18.2984	42.6532	17.21	21.9556	11.3235	15.7344	25.2797	0	62.3016	22.0189	20.4246	3.82843	6.00612	16.36	71.7655	84.4204	83.5257	56.1855	137.978	25.3553	91.7663	80.1775	24.13	86.9551	45.7182	117.692
ENSG00000158470	B4GALT5	beta-1,4-galactosyltransferase 5 [Source:HGNC Symbol;Acc:HGNC:928]	9334	2993.84	2157.44	4028.84	1.58318	0.619286	2.99629	0.00144025	0.0428952	protein_coding	20	49632945	49713878	-1	651.437	1922.56	1471.47	3230.63	1238.88	2842.87	3522.2	1444.58	954.909	2952.47	1609.82	2061.55	926.082	747.331	5151.06	2382.07	1316.3	4235.31	1164.61	1799.83	3680.19	3784	3866.66	1093.29	1913.34	5483.87	1565.12	2268.27	6313.29	6526.46	2012.39	2896.25	610.142
ENSG00000162654	GBP4	guanylate binding protein 4 [Source:HGNC Symbol;Acc:HGNC:20480]	115361	1645.36	1398.43	1951.06	1.36556	0.538431	2.57676	0.00147476	0.0432154	protein_coding	1	89181144	89198942	-1	1713.36	1085.14	814.391	848.033	1386.53	1679.62	5786.04	1028.17	1238.68	1328.04	2041.09	1506.69	896.86	936.139	1131.67	1336.02	1020.39	1531.84	817.753	718.732	521.884	1519.04	1885.39	1038.11	2889.76	1493.23	1218.21	1495.32	1962.97	1298.76	2600.37	774.924	1097.95
ENSG00000163840	DTX3L	deltex E3 ubiquitin ligase 3L [Source:HGNC Symbol;Acc:HGNC:30323]	151636	1821.23	1468.63	2257.59	1.47731	0.580264	2.78429	0.00146799	0.0432154	protein_coding	3	122564338	122575203	1	586.675	1064.88	872.006	1207.39	1784.08	2745.8	4749.92	2079.59	951.427	898.745	1992.47	1159.66	576.928	1757.73	1024.61	1639.84	1863.01	1176.58	826.942	679.692	1203.28	2678.16	1374.7	1476.62	2698.42	1125.29	839.032	1234.14	2944.45	1657.87	1776.37	1451.55	1565.62
ENSG00000255389		chromosome 6 open reading frame 3		55.3654	55.4311	55.3251	-1.5659	1.06708	-2.96061	0.00145645	0.0432154	lncRNA	6	111599875	111602295	1	58.096	40.5077	52.4369	110.25	92.0262	48.9447	59.0099	106.823	42.6532	9.56112	59.5938	35.9688	27.7225	76.6291	20.0119	82.2996	106.872	12.9974	39.8157	27.0275	54.806	131.57	31.2668	25.356	39.4817	9.19855	40.3381	65.8835	76.0304	137.683	76.6033	52.5759	102.207
ENSG00000074855	ANO8	anoctamin 8 [Source:HGNC Symbol;Acc:HGNC:29329]	57719	420.886	357.092	500.043	-1.16582	0.667799	-2.24361	0.0014569	0.0432154	protein_coding	19	17323223	17334855	-1	276.194	354.442	337.279	319.428	380.784	397.268	532.622	356.572	177.577	197.915	606.916	400.32	368.634	370.505	307.183	494.567	482.268	251.903	317.76	368.375	200.41	381.662	308.499	617.494	434.299	484.457	746.83	902.368	189.385	369.047	828.143	868.646	735.577
ENSG00000167077	MEI1	meiotic double-stranded break formation protein 1 [Source:HGNC Symbol;Acc:HGNC:28613]	150365	312.344	201.193	449.951	1.03648	0.406755	2.05122	0.00147132	0.0432154	protein_coding	22	41699503	41799456	1	99.049	110.617	236.937	127.533	98.9793	101.968	226.077	145.398	220.23	291.614	249.353	299.074	167.084	139.828	376.224	343.812	148.225	222.195	241.191	242.247	137.424	426.244	454.411	220.747	440.373	515.119	339.992	472.949	597.184	557.829	428.564	363.46	651.954
ENSG00000154102	C16orf74	chromosome 16 open reading frame 74 [Source:HGNC Symbol;Acc:HGNC:23362]	404550	194.364	253.643	121.247	-1.41998	1.04104	-2.67582	0.0014818	0.0433387	protein_coding	16	85690084	85751129	-1	208.574	243.046	312.679	372.467	475.673	186.806	152.506	339.757	248.955	43.9811	246.216	169.853	323.679	626.462	76.0452	241.515	370.025	115.12	104.899	136.139	332.108	26.0966	82.3359	101.424	268.779	68.9891	194.775	156.473	41.4711	66.7124	223.599	91.4364	306.62
ENSG00000125629	INSIG2	insulin induced gene 2 [Source:HGNC Symbol;Acc:HGNC:20452]	51141	547.899	497.859	610.116	1.20704	0.47864	2.30864	0.0014874	0.0434373	protein_coding	2	118088452	118110997	1	260.004	334.188	281.606	483.909	539.887	354.034	627.651	598.902	1047.18	391.05	542.617	388.996	304.948	492.164	612.364	731.467	554.232	831.837	318.526	221.225	538.244	429.506	769.163	269.967	390.262	1063.97	286.976	407.066	963.513	569.185	459.62	171.443	492.45
ENSG00000284543	LINC01226	long intergenic non-protein coding RNA 1226 [Source:HGNC Symbol;Acc:HGNC:49678]		295.074	402.238	162.857	-1.46295	1.26745	-2.75672	0.00149695	0.0434378	lncRNA	1	31506226	31583306	1	579.055	310.818	400.074	510.727	558.701	316.509	376.284	760.62	301.184	67.8839	290.128	311.064	403.1	1279.78	136.081	177.675	354.988	70.5576	75.803	462.471	703.481	67.4161	109.434	599.595	177.668	76.6546	333.077	175.297	128.561	105.037	157.347	64.0055	91.3664
ENSG00000186409	CCDC30	coiled-coil domain containing 30 [Source:HGNC Symbol;Acc:HGNC:26103]	728621	99.0172	98.9434	99.1793	-1.30363	0.783912	-2.46849	0.00149946	0.0434378	protein_coding	1	42463221	42657190	1	67.62	90.3632	123	112.038	112.476	113.389	209.983	117.209	69.6379	47.8056	178.781	77.9324	69.6809	110.599	39.0232	161.523	121.372	17.3299	74.2716	68.0693	95.7061	66.3288	41.6891	88.0003	160.964	102.717	88.7437	197.65	71.8833	49.6795	169.769	130.297	257.065
ENSG00000237638	LINC02245	long intergenic non-protein coding RNA 2245 [Source:HGNC Symbol;Acc:HGNC:53134]	400958	152.035	163.544	137.954	-1.31605	0.827781	-2.48984	0.00149098	0.0434378	lncRNA	2	64901840	65056168	-1	239.051	148.009	210.395	203.218	226.589	128.072	108.057	207.712	211.525	53.5422	148.2	187.171	198.553	244.897	123.073	189.981	185.281	86.6497	101.071	131.134	102.25	61.9793	61.4914	180.475	302.187	93.5186	213.215	177.65	53.9125	65.293	171.84	64.0055	490.901
ENSG00000196639	HRH1	histamine receptor H1 [Source:HGNC Symbol;Acc:HGNC:5182]	3269	11.4406	3.59054	21.1484	3.00198	1.09362	8.01098	0.00150352	0.0434378	protein_coding	3	11137093	11263557	1	0	3.89497	3.23685	0	4.09005	0	0.766363	0.989103	2.61142	20.0783	7.84129	0	5.2448	3.15996	5.00297	0	0	0	2.29706	8.00816	8.18001	23.9218	6.25336	5.96612	0	15.3309	12.6777	15.2944	20.7356	52.5183	12.4222	6.85773	4.64575
ENSG00000275549	STPG3-AS1	STPG3 antisense RNA 1 [Source:HGNC Symbol;Acc:HGNC:51176]	100129722	17.1444	25.0139	7.42868	-1.76104	1.02055	-3.38942	0.001501	0.0434378	lncRNA	9	137250219	137253497	-1	28.5718	27.2648	24.6	42.9082	30.2664	21.2094	28.3554	23.7385	4.35237	26.7711	33.7175	27.9757	11.9881	41.8695	3.00178	39.9961	27.3894	5.57034	23.7363	16.0163	35.992	5.43678	6.25336	2.98306	4.55558	0	21.8978	9.41193	11.059	4.25824	14.4925	9.14364	7.74292
ENSG00000119042	SATB2	SATB homeobox 2 [Source:HGNC Symbol;Acc:HGNC:21637]	23314	26.5147	29.156	23.2726	-1.77613	1.13286	-3.42507	0.00152077	0.0436701	protein_coding	2	199269500	199471266	-1	11.4287	46.7396	40.7843	36.3528	18.4052	59.5494	42.15	17.8039	14.798	37.2883	21.1715	7.32698	58.442	31.5996	20.0119	19.2289	52.0935	9.90282	12.251	41.0418	13.906	33.7081	8.33781	13.4238	7.59264	56.7244	47.2531	36.4712	9.6766	12.7747	41.4072	22.8591	18.583
ENSG00000267541	MTCO2P2	MT-CO2 pseudogene 2 [Source:HGNC Symbol;Acc:HGNC:25354]		95.8328	56.7567	144.212	-1.44479	0.912655	-2.72223	0.00152223	0.0436701	processed_pseudogene	18	47853233	47853457	-1	57.1436	22.5908	22.6579	41.1204	33.5384	205.568	13.7945	40.0587	41.7827	68.84	16.4667	66.6089	65.1853	41.8695	63.0375	55.3792	44.0378	43.9438	54.3638	103.105	90.7981	75.0276	64.6181	323.662	236.89	107.316	138.302	214.121	283.386	97.9395	128.362	116.581	106.852
ENSG00000183508	TENT5C	terminal nucleotidyltransferase 5C [Source:HGNC Symbol;Acc:HGNC:24712]	54855	3474.24	1450.83	5977.1	1.4169	0.561398	2.67011	0.00157637	0.0437156	protein_coding	1	117606048	117628389	1	1215.25	997.89	2278.09	1433.85	982.022	1339.45	1771.06	1249.73	1137.71	1682.76	1349.49	1881.7	984.524	432.125	1525.91	1190.65	790.532	2946.09	3863.66	504.514	910.435	5940.23	4899.51	2984.55	6710.37	6865.19	3016.13	4428.31	6394.85	6283.74	22914.7	2957.97	5900.1
ENSG00000280228		TEC		27.0288	2.24012	57.6832	3.41314	1.21226	10.6526	0.00156227	0.0437156	TEC	2	112840328	112844195	1	2.85718	1.55799	3.23685	1.1919	5.31707	0	0	3.46186	4.35237	0	1.56826	2.66436	0	3.15996	4.00238	3.84578	3.75932	1.23785	3.82843	1.00102	0	97.8621	18.7601	11.9322	0	0	9.22013	8.23544	190.767	325.046	86.9551	2.28591	13.9373
ENSG00000064933	PMS1	PMS1 homolog 1, mismatch repair system component [Source:HGNC Symbol;Acc:HGNC:9121]	5378	564.633	693.428	405.793	-1.25786	0.818953	-2.3914	0.00157112	0.0437156	protein_coding	2	189784085	189877629	1	463.816	606.836	743.827	1026.82	1050.33	872.032	1075.21	1058.83	305.536	194.091	906.453	462.932	382.121	1251.34	189.112	932.216	1067.65	291.514	351.45	361.368	968.513	383.837	204.276	739.799	625.633	266.758	564.733	511.773	153.443	272.527	523.801	470.897	808.361
ENSG00000234617	SNRK-AS1	SNRK antisense RNA 1 [Source:HGNC Symbol;Acc:HGNC:41269]		53.638	63.8414	41.0658	-1.50567	1.03973	-2.83957	0.00156028	0.0437156	lncRNA	3	43346923	43352152	-1	27.6194	85.6893	69.9159	182.956	46.2176	79.1273	47.5145	38.0805	6.96379	44.9372	62.7303	51.2889	44.9554	16.5898	77.0458	66.9165	40.2785	33.422	33.6902	54.0551	230.676	25.0092	29.1824	52.2036	37.9632	61.3237	54.1682	38.8242	58.0596	22.7106	60.0404	77.7209	78.9778
ENSG00000121594	CD80	CD80 molecule [Source:HGNC Symbol;Acc:HGNC:1700]	941	74.4744	17.6575	144.748	2.27606	0.866473	4.84352	0.00155075	0.0437156	protein_coding	3	119524293	119559614	-1	7.61915	10.1269	7.76843	13.1108	6.54408	6.52597	19.9254	13.8474	33.078	34.42	12.5461	33.9706	7.49257	3.94995	11.0065	24.613	18.2596	61.8926	29.0961	15.0153	0	46.7563	154.25	98.441	83.519	156.375	16.1352	64.707	819.746	119.231	57.97	38.8605	69.6863
ENSG00000145012	LPP	LIM domain containing preferred translocation partner in lipoma [Source:HGNC Symbol;Acc:HGNC:6679]	4026	1762.74	1823.29	1689.41	-1.13284	0.653041	-2.1929	0.00156676	0.0437156	protein_coding	3	188153284	188890671	1	2547.65	1894.51	1687.69	1430.27	1299	1734.28	2141.22	1223.52	793.001	1236.25	2061.47	2847.53	3352.92	1206.32	1926.15	1305.26	1454.32	1436.53	3078.06	2382.43	1250.72	1836.55	894.231	1396.07	2570.87	1867.31	1509.8	2503.57	796.246	1064.56	3109.68	2816.24	3947.34
ENSG00000095951	HIVEP1	HIVEP zinc finger 1 [Source:HGNC Symbol;Acc:HGNC:4920]	3096	1964.95	1126.16	3002.94	1.62558	0.638672	3.08567	0.00152698	0.0437156	protein_coding	6	12008762	12164999	1	1860.03	976.858	971.701	535.161	682.221	535.945	734.942	526.203	1317.03	2097.71	684.544	2024.91	1692.57	406.845	2165.29	456.109	613.307	2059.17	1771.03	1346.37	191.412	2549.85	5101.7	1194.72	1161.67	2689.04	1341.53	1836.5	5206.01	4644.32	1488.59	1074.38	1726.67
ENSG00000112079	STK38	serine/threonine kinase 38 [Source:HGNC Symbol;Acc:HGNC:17847]	11329	3292.14	4004.91	2413.47	-1.12494	0.640473	-2.18093	0.00153997	0.0437156	protein_coding	6	36493892	36547479	-1	3275.28	2697.65	2732.55	5281.29	5152.65	3976.76	6452.78	4980.13	2608.81	1219.04	6487.88	3453.67	3148.38	5443.82	1825.09	7237.75	5262.52	2027.6	2708.23	2507.55	5623.76	1305.92	2977.64	2434.18	3167.65	2042.08	2414.52	3341.23	898.541	1501.74	4387.09	3218.56	4596.2
ENSG00000197558	SSPOP	SCO-spondin, pseudogene [Source:HGNC Symbol;Acc:HGNC:21998]		120.334	106.653	137.345	-1.17471	0.647394	-2.25747	0.00154529	0.0437156	transcribed_unitary_pseudogene	7	149776042	149833979	1	131.43	110.617	75.0948	81.6448	91.6172	151.729	107.291	76.1609	42.6532	71.7084	195.248	109.905	107.144	51.3494	125.074	73.0698	111.169	117.596	110.259	163.166	135.788	226.17	54.1958	73.085	54.667	136.445	124.472	258.828	149.296	211.493	161.488	192.016	281.842
ENSG00000138172	CALHM2	calcium homeostasis modulator family member 2 [Source:HGNC Symbol;Acc:HGNC:23493]	51063	218.763	218.921	218.678	-1.25791	0.781092	-2.39149	0.0015398	0.0437156	protein_coding	10	103446786	103452402	-1	60.9532	220.455	84.8054	151.967	262.172	168.859	343.331	358.55	156.685	181.661	419.509	183.175	164.087	190.388	222.132	313.815	324.376	380.64	115.619	177.18	116.974	80.4644	460.664	244.611	285.483	114.982	345.755	325.888	81.5599	160.394	385.087	416.036	131.63
ENSG00000133985	TTC9	tetratricopeptide repeat domain 9 [Source:HGNC Symbol;Acc:HGNC:20267]	23508	358.327	358.574	358.361	-1.37245	1.01058	-2.5891	0.00156559	0.0437156	protein_coding	14	70641916	70675366	1	312.385	224.35	270.6	311.681	505.53	71.7856	454.453	308.6	169.742	300.219	501.058	185.839	396.357	234.627	171.102	1365.25	419.97	259.949	287.898	518.528	260.124	167.453	465.875	250.577	820.005	196.236	383.788	504.715	241.915	105.037	639.741	452.61	901.276
ENSG00000166126	AMN	amnion associated transmembrane protein [Source:HGNC Symbol;Acc:HGNC:14604]	81693	110.889	106.56	116.349	-1.29724	0.7944	-2.45758	0.00155415	0.0437156	protein_coding	14	102922663	102933596	1	162.859	77.8993	82.2159	68.534	173.827	74.2329	88.1317	210.679	60.0627	51.63	53.3208	83.9272	244.258	229.887	97.0577	151.524	72.5013	37.1356	50.5353	93.0948	74.4381	142.444	116.729	101.424	180.705	187.037	152.132	187.062	64.9714	62.4542	188.403	32.0027	232.288
ENSG00000173894	CBX2	chromobox 2 [Source:HGNC Symbol;Acc:HGNC:1552]	84733	313.741	427.472	173.401	-1.13809	0.638698	-2.20089	0.00154077	0.0437156	protein_coding	17	79778148	79787983	1	648.58	468.954	373.532	494.041	674.041	449.476	442.958	514.334	559.714	212.257	391.28	319.723	390.363	880.839	175.104	237.669	427.489	229.622	273.35	405.413	408.182	178.327	71.9137	289.357	183.742	196.236	443.719	127.061	186.62	112.134	107.659	196.588	119.241
ENSG00000275888		novel transcript, antisense to CSNK1D		145.284	20.8089	299.256	1.94215	0.759069	3.84278	0.00157331	0.0437156	lncRNA	17	82244770	82245591	1	24.7622	37.3917	40.7843	18.4744	2.04503	22.8409	11.4954	0.989103	3.48189	38.2445	10.1937	18.6505	19.4807	8.68989	27.0161	7.69155	6.44456	31.5652	35.2216	69.0704	2.454	413.196	340.808	167.051	124.519	358.743	101.421	381.183	938.63	360.531	275.358	244.592	294.231
ENSG00000101079	NDRG3	NDRG family member 3 [Source:HGNC Symbol;Acc:HGNC:14462]	57446	445.557	469.439	416.321	-1.22763	0.764036	-2.34182	0.0015548	0.0437156	protein_coding	20	36651766	36746090	-1	387.624	486.871	497.827	513.707	676.495	509.025	840.7	580.603	72.2493	261.018	679.055	318.391	341.661	640.682	233.139	941.446	538.12	176.394	242.723	265.27	655.219	458.865	221.994	435.527	526.929	413.935	567.038	758.837	282.004	295.238	654.233	806.926	565.233
ENSG00000100154	TTC28	tetratricopeptide repeat domain 28 [Source:HGNC Symbol;Acc:HGNC:29179]	23331	168.66	151.279	190.308	-1.26783	0.770057	-2.40799	0.0015299	0.0437156	protein_coding	22	27978014	28679865	-1	149.526	191.632	217.516	111.442	143.152	141.124	86.599	229.966	128.83	61.1911	250.921	123.893	290.712	142.988	74.044	236.131	164.873	113.882	206.735	74.0755	37.628	252.267	114.645	149.153	98.7043	220.765	298.502	374.124	116.119	62.4542	231.88	201.16	481.609
ENSG00000176845	METRNL	meteorin like, glial cell differentiation regulator [Source:HGNC Symbol;Acc:HGNC:27584]	284207	2314.05	930.577	4025.87	1.67407	0.658725	3.19114	0.00158383	0.043826	protein_coding	17	83079609	83095122	1	484.768	1048.53	1545.92	476.758	424.138	941.371	1042.25	328.877	3035.34	1279.28	433.623	842.603	477.277	300.196	1716.02	601.479	530.602	2104.35	674.57	725.739	528.428	3260.98	5635.32	1792.82	1436.53	12484	1953.51	3084.76	5071.92	5371.06	2687.33	2128.18	1245.06
ENSG00000185829	ARL17A	ADP ribosylation factor like GTPase 17A [Source:HGNC Symbol;Acc:HGNC:24096]	51326	55.3375	59.9862	49.6308	-1.28952	0.737432	-2.44448	0.00159461	0.0439995	protein_coding	17	46516702	46579691	-1	73.3343	49.0766	25.8948	61.9785	93.6622	50.5762	124.151	43.026	53.9694	58.3228	101.937	71.2716	80.9197	49.7694	55.0327	56.1483	56.9269	29.0895	29.8618	44.0449	50.716	14.1356	65.6603	59.6612	86.5561	45.9928	50.7107	151.767	40.0888	34.0659	47.6182	20.5732	46.4575
ENSG00000171621	SPSB1	splA/ryanodine receptor domain and SOCS box containing 1 [Source:HGNC Symbol;Acc:HGNC:30628]	80176	377.221	124.54	689.701	2.30167	0.872441	4.93029	0.00160301	0.0441689	protein_coding	1	9292894	9369532	1	43.8101	203.317	95.8107	116.806	152.15	131.335	152.506	48.9606	245.474	257.194	114.483	135.882	95.9049	113.759	181.108	23.8438	113.317	163.397	111.79	49.05	65.4401	387.099	1400.75	47.729	91.1116	581.042	93.3538	91.7663	1698.93	1523.03	140.784	114.296	88.2693
ENSG00000068383	INPP5A	inositol polyphosphate-5-phosphatase A [Source:HGNC Symbol;Acc:HGNC:6076]	3632	530.346	366.296	733.487	1.13426	0.450897	2.19506	0.00160855	0.0441965	protein_coding	10	132537787	132783480	1	265.718	341.199	387.127	377.235	391.418	504.947	339.499	287.334	490.077	384.357	326.198	383.001	227.025	390.255	412.245	387.654	356.599	425.821	352.982	249.254	412.272	948.175	977.609	186.441	420.632	1622.01	429.888	461.184	1448.72	502.472	494.816	338.315	679.828
ENSG00000185291	IL3RA	interleukin 3 receptor subunit alpha [Source:HGNC Symbol;Acc:HGNC:6012]	3563	809.886	464.187	1237.73	1.08889	0.433844	2.1271	0.0016143	0.0442761	protein_coding	X	1336616	1382689	1	401.91	398.845	512.716	275.924	683.039	626.493	586.268	467.351	678.099	820.344	246.216	505.562	435.318	470.044	463.275	314.585	377.007	370.737	241.191	524.534	348.468	1041.69	914.033	1036.61	1299.86	1468.7	605.071	1018.84	1860.67	1303.02	792.947	530.331	823.846
ENSG00000135314	KHDC1	KH domain containing 1 [Source:HGNC Symbol;Acc:HGNC:21366]	80759	54.8027	66.8043	40.0071	-1.23457	0.690867	-2.3531	0.00163274	0.0443979	protein_coding	6	73241314	73310365	-1	77.1439	96.5952	85.4527	83.4327	74.03	75.0486	83.5336	54.4007	86.1769	25.815	52.5366	33.3045	67.4331	127.978	66.0393	39.9961	94.5202	45.1816	20.6735	62.0632	51.534	40.2322	68.787	23.8645	53.1485	19.9302	100.269	47.0596	38.7064	32.6465	60.0404	27.4309	63.4919
ENSG00000287733		novel transcript		54.9635	36.0083	78.434	1.28619	0.522729	2.43883	0.00163408	0.0443979	lncRNA	7	135170816	135172414	1	67.62	32.7177	26.5421	28.0095	14.7242	43.2345	30.6545	11.8692	53.9694	33.4639	12.5461	53.9532	62.1883	16.5898	37.022	50.7643	30.6116	35.2788	43.6441	47.0479	23.722	88.0759	60.4492	71.5935	157.927	72.0553	29.9654	41.1772	127.178	41.163	74.5329	38.8605	91.3664
ENSG00000236144	TMEM147-AS1	TMEM147 antisense RNA 1 [Source:HGNC Symbol;Acc:HGNC:51273]	100506469	303.182	387.943	198.664	-1.02545	0.541866	-2.03559	0.00162804	0.0443979	lncRNA	19	35540738	35546029	-1	325.719	402.74	302.969	504.768	416.776	447.029	334.134	521.257	493.558	232.335	395.985	511.557	219.532	382.355	187.111	787.615	498.379	246.952	251.911	216.22	467.896	152.23	111.518	217.763	346.224	220.765	360.737	181.18	143.767	176.007	134.573	258.308	326.751
ENSG00000151012	SLC7A11	solute carrier family 7 member 11 [Source:HGNC Symbol;Acc:HGNC:11059]	23657	773.108	101.402	1603.5	3.43641	1.20299	10.8259	0.00164244	0.044461	protein_coding	4	138164097	138242349	-1	128.573	63.8775	74.4475	17.8784	36.8105	41.603	64.3745	73.6882	107.068	510.564	27.4445	60.6141	102.648	33.1796	207.123	4.61493	68.2049	157.826	70.4432	270.275	8.18001	226.17	1144.37	129.763	832.153	472.192	168.267	55.2951	2148.2	448.535	68.3218	34.2887	24.7773
ENSG00000172345	STARD5	StAR related lipid transfer domain containing 5 [Source:HGNC Symbol;Acc:HGNC:18065]	80765	206.772	221.796	188.35	1.11505	0.447396	2.16603	0.00164324	0.044461	protein_coding	15	81309053	81324183	-1	146.669	215.781	216.869	163.886	134.563	212.094	147.908	140.453	305.536	545.94	157.61	240.458	283.219	105.069	196.117	259.974	102.039	237.049	370.592	218.222	257.67	168.54	133.405	111.865	147.297	213.1	65.6934	172.944	125.796	140.522	76.6033	102.866	100.658
ENSG00000147650	LRP12	LDL receptor related protein 12 [Source:HGNC Symbol;Acc:HGNC:31708]	29967	234.245	140.931	349.715	1.86761	0.733718	3.64928	0.00165465	0.0445227	protein_coding	8	104489231	104589024	-1	136.192	120.744	139.184	94.1597	105.523	209.647	103.459	105.834	133.182	278.228	81.5494	137.88	203.049	79.789	230.137	15.3831	110.632	222.195	139.355	260.265	53.17	167.453	184.474	196.882	37.9632	263.692	107.184	89.4133	1065.81	640.155	118.01	141.726	52.6518
ENSG00000230916	MTCO1P53	MT-CO1 pseudogene 53 [Source:HGNC Symbol;Acc:HGNC:52118]		15.9319	20.9436	9.75295	-1.35308	0.65629	-2.55457	0.00167514	0.0448551	processed_pseudogene	X	126471705	126472403	1	19.0479	13.2429	20.7158	25.0298	11.4521	26.1039	20.6918	23.2439	30.4666	21.9906	23.5239	15.3201	23.227	27.6497	21.0125	27.6896	11.278	12.9974	13.0167	30.0306	22.086	7.6115	2.08445	23.8645	7.59264	7.66546	10.3726	7.05894	26.2651	8.51648	8.28143	9.14364	6.19433
ENSG00000168096	ANKS3	ankyrin repeat and sterile alpha motif domain containing 3 [Source:HGNC Symbol;Acc:HGNC:29422]	124401	279.449	232.066	338.221	-1.13985	0.659995	-2.20358	0.00167393	0.0448551	protein_coding	16	4696510	4734378	-1	220.955	250.836	212.984	311.681	258.491	278.169	290.452	294.753	124.478	65.9717	429.703	150.536	183.568	280.447	67.0399	399.192	314.709	102.742	169.217	163.166	304.296	319.683	253.261	627.934	470.744	159.442	327.314	509.42	150.678	188.782	563.137	320.027	620.982
ENSG00000155962	CLIC2	chloride intracellular channel 2 [Source:HGNC Symbol;Acc:HGNC:2063]	1193	209.174	154.634	276.694	1.47753	0.594416	2.78472	0.00168221	0.044954	protein_coding	X	155276211	155334657	-1	122.859	182.284	167.021	170.441	137.835	57.1022	131.048	196.337	436.107	172.1	180.35	125.225	43.4569	144.568	114.068	88.4529	84.3163	178.251	219.752	56.0571	239.674	79.377	76.0826	338.577	353.817	104.25	153.285	305.888	434.065	229.945	331.257	80.0069	75.8806
ENSG00000173926	MARCHF3	membrane associated ring-CH-type finger 3 [Source:HGNC Symbol;Acc:HGNC:28728]	115123	294.868	201.727	410.204	1.12186	0.451726	2.17627	0.00168644	0.0450056	protein_coding	5	126867714	127030558	-1	360.005	158.136	179.969	156.734	197.55	176.201	96.5617	146.387	210.655	152.978	110.562	237.794	349.903	183.278	234.139	175.367	145.54	230.241	358.341	226.23	149.694	329.469	400.215	213.289	601.337	438.464	209.758	240.004	940.012	448.535	320.906	116.581	498.644
ENSG00000249846	LINC02021	long intergenic non-protein coding RNA 2021 [Source:HGNC Symbol;Acc:HGNC:52856]	105374104	32.0265	36.2543	26.8258	-1.59954	1.12865	-3.03048	0.00170236	0.0452447	lncRNA	3	130111669	130201336	1	18.0955	21.8118	79.6264	71.5137	70.7579	73.4171	22.2245	19.7821	6.96379	19.1222	37.6382	14.654	44.9554	56.0893	31.0184	37.6886	22.5559	14.8542	16.0794	44.0449	38.446	20.6598	12.5067	41.7629	44.0373	19.9302	67.9984	43.5302	16.5885	7.09707	16.5629	27.4309	60.3948
ENSG00000138642	HERC6	HECT and RLD domain containing E3 ubiquitin protein ligase family member 6 [Source:HGNC Symbol;Acc:HGNC:26072]	55008	590.697	365.625	869.092	1.74506	0.693711	3.35209	0.00171169	0.0453623	protein_coding	4	88378739	88443097	1	200.955	288.228	181.263	277.116	295.711	1285.62	965.617	264.09	367.34	320.297	438.328	604.809	197.804	221.197	256.152	400.73	275.505	255.617	217.455	149.152	215.134	473	477.34	468.341	1477.53	450.729	271.994	736.483	803.158	300.916	1035.18	262.88	1097.95
ENSG00000168394	TAP1	transporter 1, ATP binding cassette subfamily B member [Source:HGNC Symbol;Acc:HGNC:43]	6890	3031.27	2621.76	3538.99	1.02252	0.408473	2.03147	0.00171841	0.0453623	protein_coding	6	32845209	32853978	-1	1891.45	1738.71	1491.54	1778.31	2229.08	3927	6945.55	2539.03	2766.36	2354.9	2542.93	4063.81	1565.2	1956.02	2321.38	3749.63	1998.35	3514.88	1794.77	2072.11	1815.96	3003.28	3296.56	3047.2	4664.92	3148.97	2543.6	3112.99	3560.99	3146.84	4151.07	2384.2	3022.83
ENSG00000141526	SLC16A3	solute carrier family 16 member 3 [Source:HGNC Symbol;Acc:HGNC:10924]	9123	2456.8	1024.18	4229.14	1.43928	0.578726	2.71185	0.00170944	0.0453623	protein_coding	17	82228397	82261129	1	332.385	1058.65	976.88	1853.4	739.891	1561.34	1358	1001.47	615.425	766.801	1393.4	487.577	366.387	642.262	1181.7	1494.47	1297.5	1057.74	521.433	1491.52	1309.62	4026.48	5912.55	1722.72	1435.01	5808.88	926.623	4104.78	12453.8	4444.18	2772.21	3625.45	2109.17
ENSG00000101082	SLA2	Src like adaptor 2 [Source:HGNC Symbol;Acc:HGNC:17329]	84174	1049.42	425.537	1821.24	1.67107	0.666046	3.1845	0.00171406	0.0453623	protein_coding	20	36612318	36646196	-1	318.1	327.177	291.964	155.542	285.077	481.29	703.521	306.127	845.23	713.259	353.642	503.563	330.422	101.119	380.226	398.422	327.061	834.931	1002.28	161.164	116.156	1695.19	4927.65	799.46	780.523	4669.8	830.964	991.782	2897.45	2515.2	1362.3	448.038	707.703
ENSG00000145349	CAMK2D	calcium/calmodulin dependent protein kinase II delta [Source:HGNC Symbol;Acc:HGNC:1462]	817	1377.45	1576.08	1133.13	-1.05686	0.587057	-2.08039	0.00173026	0.0456133	protein_coding	4	113451032	113761927	-1	2747.66	1393.62	2063.81	1819.43	2151.78	1194.25	1403.98	1227.97	1099.41	741.943	1592.57	1681.21	2562.46	2513.75	1292.77	1595.23	1659.47	1326.98	1168.44	889.907	970.967	1146.07	1040.14	668.206	1353.01	1021.04	1860.16	1552.97	837.717	706.868	1494.8	843.501	3261.32
ENSG00000161912	ADCY10P1	ADCY10 pseudogene 1 [Source:HGNC Symbol;Acc:HGNC:44143]	221442	308.265	389.324	208.328	-1.14227	0.675389	-2.20728	0.00173486	0.0456476	transcribed_unprocessed_pseudogene	6	41101022	41140835	1	338.1	291.344	434.385	404.052	458.086	261.039	462.117	315.029	173.224	379.576	540.265	481.583	343.909	285.976	313.186	899.143	257.245	309.463	319.291	286.292	622.499	173.977	101.096	216.272	385.706	197.769	342.297	262.357	107.825	140.522	300.202	210.304	483.158
ENSG00000170525	PFKFB3	6-phosphofructo-2-kinase/fructose-2,6-biphosphatase 3 [Source:HGNC Symbol;Acc:HGNC:8874]	5209	10632.9	5061.2	17525.7	2.04039	0.794908	4.11357	0.00173624	0.0456476	protein_coding	10	6144934	6254644	1	4724.83	3584.15	6684.74	2399.28	936.622	5801.58	3434.07	964.375	3945.86	10079.3	1112.68	5344.03	6553.75	639.892	17135.2	1765.98	893.645	11167.3	8370.49	7456.6	3290.82	20351	12984.1	4498.46	2646.79	22225.2	5401.84	11249.6	27901.8	33543.6	9832.13	14796.7	2761.12
ENSG00000258860		novel transcript		12.3776	0.850518	26.6302	4.31213	1.47926	19.8646	0.00173946	0.0456707	lncRNA	14	35362232	35363628	-1	0	0	3.88422	0	0	0	1.53273	1.48365	0	0.956112	0	0	2.99703	0	0	0	0	0	0	7.00714	0	40.2322	5.21113	0	6.07411	0	3.45755	0	100.913	126.328	20.7036	25.145	4.64575
ENSG00000286225		novel transcript		10.5013	0.0414511	23.4307	9.42684	2.57623	688.273	0.00177214	0.0461561	lncRNA	2	145572662	145765726	1	0	0	0	0	0	0	0	0	0.870473	0	0	0	0	0	0	0	0	0	0	0	0	30.446	1.04223	0	0	13.7978	0	0	67.7362	51.0989	0	0	0
ENSG00000172738	TMEM217	transmembrane protein 217 [Source:HGNC Symbol;Acc:HGNC:21238]	221468	37.9497	22.9442	56.5162	1.84075	0.737922	3.58197	0.00177125	0.0461561	protein_coding	6	37212178	37258155	-1	22.8575	21.0328	20.7158	22.0501	20.8593	37.5243	32.1872	24.233	16.539	18.1661	10.9778	15.9861	19.4807	27.6497	30.0178	21.5363	12.8891	32.1842	14.548	35.0357	25.358	96.7747	51.0691	22.373	27.3335	22.9964	34.5755	0	225.326	88.0036	8.28143	16.0014	7.74292
ENSG00000137877	SPTBN5	spectrin beta, non-erythrocytic 5 [Source:HGNC Symbol;Acc:HGNC:15680]	51332	155.193	52.3812	282.358	1.53835	0.623912	2.90461	0.00176676	0.0461561	protein_coding	15	41848146	41894053	-1	23.8098	28.8228	49.2001	56.615	34.7654	30.1826	45.2154	63.3026	53.9694	80.3134	87.8224	62.6124	57.6928	15.0098	45.0268	91.5295	32.7598	67.463	92.6481	64.0653	17.178	245.743	491.931	73.085	123.001	410.869	165.962	249.416	188.002	292.399	316.765	180.587	162.601
ENSG00000169660	HEXD	hexosaminidase D [Source:HGNC Symbol;Acc:HGNC:26307]	284004	743.018	681.542	819.485	-1.24832	0.873749	-2.37565	0.00176945	0.0461561	protein_coding	17	82418318	82442645	1	402.863	561.654	521.78	802.741	1156.67	845.113	958.72	1071.69	259.401	255.282	1151.1	406.314	413.59	1033.31	304.181	1608.3	919.423	296.466	329.245	247.252	767.285	567.6	598.238	817.359	2045.46	449.196	1150.21	1225.9	485.212	597.573	1231.86	630.911	1819.59
ENSG00000163013	FBXO41	F-box protein 41 [Source:HGNC Symbol;Acc:HGNC:29409]	150726	971.871	941.661	1009.87	-1.23858	0.872641	-2.35967	0.00180578	0.0469071	protein_coding	2	73254682	73284478	-1	809.535	1230.81	1222.23	1133.49	1156.26	1069.44	1052.98	965.364	271.588	318.385	1519.64	640.778	1100.66	1486.76	460.274	1528.31	1230.91	402.302	820.05	624.636	730.475	854.662	308.499	1497.5	1687.08	740.483	1640.03	1740.03	298.592	361.95	1318.82	1901.88	1948.12
ENSG00000170500	LONRF2	LON peptidase N-terminal domain and ring finger 2 [Source:HGNC Symbol;Acc:HGNC:24788]	164832	46.1952	12.9795	87.2849	2.53119	0.965633	5.78048	0.00181508	0.0470233	protein_coding	2	100271875	100322501	-1	15.2383	11.6849	7.12106	4.76758	10.6341	2.44724	0	5.93462	26.9847	45.8934	7.84129	3.33045	27.7225	7.10991	30.0178	0.769155	5.90751	10.5217	17.6108	31.0316	0	72.8529	12.5067	83.5257	31.8891	110.383	29.9654	96.4722	420.241	69.5512	8.28143	11.4296	17.0344
ENSG00000154262	ABCA6	ATP binding cassette subfamily A member 6 [Source:HGNC Symbol;Acc:HGNC:36]	23460	35.5217	19.7931	54.9818	2.02859	0.805199	4.08005	0.00181329	0.0470233	protein_coding	17	69078702	69141895	-1	4.76197	31.1597	11.0053	19.0703	20.8593	67.7069	7.66363	33.6295	26.1142	7.64889	19.6032	15.9861	26.9732	15.0098	4.00238	23.0747	44.5748	3.71356	10.7196	15.0153	7.36201	69.5908	11.4645	23.8645	19.7409	12.2647	21.8978	52.9421	81.5599	154.716	28.985	13.7155	26.3259
ENSG00000239523	MYLK-AS1	MYLK antisense RNA 1 [Source:HGNC Symbol;Acc:HGNC:42440]	100506826	29.5739	37.0203	20.3966	-1.37293	0.817259	-2.58996	0.00183633	0.0471977	lncRNA	3	123585300	123644568	1	32.3814	26.4858	34.9579	50.6555	52.3527	33.4456	21.4582	38.575	39.1713	15.2978	44.6953	22.647	39.7106	86.1089	10.0059	55.3792	55.8528	17.9489	18.3765	23.0235	58.8961	23.9218	11.4645	14.9153	33.4076	10.7316	27.6604	27.0593	19.3532	35.4853	4.14072	9.14364	51.1033
ENSG00000122012	SV2C	synaptic vesicle glycoprotein 2C [Source:HGNC Symbol;Acc:HGNC:30670]	22987	13.8312	3.47046	26.6482	3.02774	1.12702	8.15531	0.00183628	0.0471977	protein_coding	5	76083383	76353939	1	1.90479	3.89497	2.58948	0	2.45403	8.15746	0	0	26.9847	2.86833	0.784129	0	4.49554	0	4.00238	3.84578	3.22228	0	0.765687	2.00204	4.908	28.2713	18.7601	0	3.03705	68.9891	11.5252	21.1768	27.6474	22.7106	6.21108	6.85773	15.4858
ENSG00000062582	MRPS24	mitochondrial ribosomal protein S24 [Source:HGNC Symbol;Acc:HGNC:14510]	64951	64.5663	19.7758	119.972	1.65339	0.676379	3.14572	0.00182958	0.0471977	protein_coding	7	43866558	43869893	-1	9.52394	24.1488	20.0684	16.0906	6.54408	39.1558	20.6918	7.91282	13.0571	29.6395	32.1493	16.6522	35.2151	6.31992	32.019	1.53831	8.59274	16.0921	24.502	21.0214	34.356	134.832	85.4626	70.1019	51.6299	85.8531	50.7107	82.3544	193.532	204.396	138.714	34.2887	37.166
ENSG00000166501	PRKCB	protein kinase C beta [Source:HGNC Symbol;Acc:HGNC:9395]	5579	6324.27	7104.57	5364.32	-1.1647	0.757824	-2.24186	0.00183061	0.0471977	protein_coding	16	23835983	24220611	1	8994.41	6627.68	8928.52	7859.95	8660.69	6643.43	10248.6	7056.75	4256.62	1927.52	8507.8	8149.6	8388.68	8488.45	6208.69	9147.56	8603.48	5326.48	4959.35	3453.52	6758.32	4069.98	2036.51	4298.59	9218.98	4439.83	8363.81	8198.96	1687.88	2661.4	9030.9	8551.59	13331.8
ENSG00000184005	ST6GALNAC3	ST6 N-acetylgalactosaminide alpha-2,6-sialyltransferase 3 [Source:HGNC Symbol;Acc:HGNC:19343]	256435	47.6043	47.7479	47.4703	-1.44302	0.994757	-2.7189	0.00184727	0.0473542	protein_coding	1	76074746	76634603	1	27.6194	49.8556	57.6159	73.3015	56.0337	34.2613	70.5054	53.4116	26.1142	4.78056	50.1842	42.6297	37.4628	71.8891	21.0125	131.526	49.9453	19.1867	21.4392	36.0367	67.8941	127.221	40.6468	14.9153	39.4817	99.651	73.761	44.7066	27.6474	19.8718	35.1961	68.5773	69.6863
ENSG00000232593	KANTR	KDM5C adjacent transcript [Source:HGNC Symbol;Acc:HGNC:49510]		337.039	362.594	305.69	-1.10339	0.657026	-2.14859	0.00186668	0.0477264	protein_coding	X	53094145	53170914	1	312.385	332.63	190.327	547.676	405.324	433.977	401.574	511.861	186.281	183.573	676.703	353.027	250.252	474.784	172.102	598.403	465.082	152.256	289.43	194.198	482.62	219.646	351.23	454.917	581.596	148.71	299.654	347.065	299.975	185.943	393.368	185.159	755.709
ENSG00000011590	ZBTB32	zinc finger and BTB domain containing 32 [Source:HGNC Symbol;Acc:HGNC:16763]	27033	101.736	20.7218	201.936	2.23752	0.874831	4.71586	0.00186923	0.047729	protein_coding	19	35704558	35717038	1	2.85718	7.78993	14.8895	21.4541	6.95309	10.6047	37.5518	35.1132	26.1142	43.9811	26.6604	23.3131	0	3.15996	9.00535	25.3821	3.22228	79.2226	26.799	0	31.084	125.046	388.751	292.34	165.519	222.298	53.0157	295.299	533.595	221.428	192.543	112.01	195.122
ENSG00000184937	WT1	WT1 transcription factor [Source:HGNC Symbol;Acc:HGNC:12796]	7490	12.101	5.24853	20.5762	2.65765	1.01893	6.31004	0.0018753	0.0478214	protein_coding	11	32387775	32435564	-1	4.76197	3.89497	2.58948	4.17163	2.04503	1.63149	2.29909	0.989103	20.0209	5.73667	3.13651	6.66089	4.49554	1.57998	16.0095	0	2.14819	9.90282	4.59412	7.00714	6.54401	36.9701	5.21113	2.98306	0	10.7316	17.2877	4.70596	15.2061	35.4853	0	4.57182	1.54858
ENSG00000134028	ADAMDEC1	ADAM like decysin 1 [Source:HGNC Symbol;Acc:HGNC:16299]	27299	78.3419	10.2551	162.557	2.85057	1.0657	7.21288	0.00188814	0.0478361	protein_coding	8	24384285	24406013	1	6.66676	12.4639	5.17895	2.38379	1.22702	58.7337	11.4954	5.44007	21.7618	0.956112	2.35239	4.66262	2.24777	13.4298	17.0101	3.84578	12.8891	11.7596	2.29706	12.0122	6.54401	21.7471	51.0691	2.98306	21.2594	180.905	11.5252	590.598	1058.9	92.2619	105.588	52.5759	15.4858
ENSG00000147642	SYBU	syntabulin [Source:HGNC Symbol;Acc:HGNC:26011]	55638	16.3048	2.09206	33.8739	2.48988	0.994975	5.61732	0.00188777	0.0478361	protein_coding	8	109573978	109691791	-1	2.85718	0.778993	1.94211	2.38379	0	0	3.06545	0	1.74095	2.86833	3.92064	2.66436	2.99703	1.57998	0	6.15324	4.29637	0.618926	3.06275	3.00306	0	15.223	7.29559	37.2883	209.557	21.4633	3.45755	30.5888	71.8833	2.83883	33.1257	13.7155	15.4858
ENSG00000133477	FAM83F	family with sequence similarity 83 member F [Source:HGNC Symbol;Acc:HGNC:25148]	113828	175.737	50.7986	330.317	1.93626	0.772712	3.82713	0.00188418	0.0478361	protein_coding	22	39994954	40043534	1	66.6676	63.8775	72.5054	38.1406	38.4465	39.9715	19.1591	61.3244	67.8969	62.1472	14.1143	76.6003	50.2002	43.4495	34.0202	39.2269	40.8155	73.6522	84.9912	28.0286	51.534	845.964	489.847	123.797	82.0005	1068.57	85.2862	45.8831	577.831	390.339	64.1811	36.5746	52.6518
ENSG00000168884	TNIP2	TNFAIP3 interacting protein 2 [Source:HGNC Symbol;Acc:HGNC:19118]	79155	1057.11	707.721	1489.66	1.00079	0.405464	2.00109	0.00189286	0.0478638	protein_coding	4	2741648	2756342	-1	483.816	603.72	684.269	592.372	535.797	665.649	733.409	578.131	658.948	986.707	591.233	676.081	828.678	441.605	982.584	832.995	523.083	1070.12	870.586	921.939	600.413	1102.58	1566.47	756.206	929.339	1996.09	832.116	990.605	3012.19	1673.49	1066.23	1286.97	778.937
ENSG00000109667	SLC2A9	solute carrier family 2 member 9 [Source:HGNC Symbol;Acc:HGNC:13446]	56606	114.329	128.329	97.082	-1.3786	1.24057	-2.60016	0.00192994	0.0485798	protein_coding	4	9771153	10054936	-1	57.1436	177.61	194.858	107.271	133.745	163.965	166.301	198.81	28.7256	100.392	245.432	109.239	98.1527	173.008	44.0262	136.14	154.132	74.8901	58.1922	101.103	171.78	123.959	17.7179	99.9326	33.4076	90.4524	223.588	171.768	35.9416	73.8095	95.2365	352.03	18.583
ENSG00000165997	ARL5B	ADP ribosylation factor like GTPase 5B [Source:HGNC Symbol;Acc:HGNC:23052]	221079	2875.24	2394.17	3472.08	1.29523	0.532398	2.45416	0.00193691	0.0486297	protein_coding	10	18659431	18681639	1	4454.35	2800.48	3473.78	1893.92	1255.24	2428.48	1626.99	1087.52	2414.69	2891.28	1281.27	2716.31	3730.55	1056.22	3431.04	1142.2	1119.2	2696.66	3594.13	3844.92	1338.25	3275.12	1626.92	2250.72	1202.67	2909.81	1918.94	1715.32	3854.05	3442.08	3703.87	2279.05	3447.15
ENSG00000179240	GVQW3	GVQW motif containing 3 [Source:HGNC Symbol;Acc:HGNC:51239]	100506127	205.712	259.198	139.735	-1.30122	1.04766	-2.46437	0.00195102	0.0487956	protein_coding	11	76381303	76414619	1	157.145	200.98	147.6	518.474	388.146	331.193	274.358	529.665	119.255	22.9467	365.404	125.891	131.869	629.622	83.0494	386.116	445.748	107.074	91.1167	115.117	272.394	57.6299	135.489	177.492	227.779	157.908	130.234	185.886	105.06	97.9395	115.94	125.725	305.071
ENSG00000140859	KIFC3	kinesin family member C3 [Source:HGNC Symbol;Acc:HGNC:6326]	3801	367.688	114.899	680.276	2.11221	0.834304	4.32354	0.0019507	0.0487956	protein_coding	16	57758217	57863053	-1	83.8107	98.9322	75.0948	81.0489	38.8555	158.255	106.524	96.9321	194.986	241.896	41.5588	99.9134	203.798	45.8194	158.094	66.9165	111.706	87.2686	260.333	134.137	26.994	229.432	718.094	170.035	223.224	283.622	132.539	222.357	1013.28	432.921	269.147	205.732	96.0122
ENSG00000229162	RUNX3-AS1	RUNX3 antisense RNA 1 [Source:HGNC Symbol;Acc:HGNC:40513]		22.1254	6.89804	40.9599	1.94256	0.799054	3.84387	0.00195884	0.0488658	lncRNA	1	24961345	24963097	1	0.952394	5.45295	6.47369	2.38379	6.13508	4.07873	3.06545	3.95641	5.22284	21.9906	4.70477	15.9861	3.74628	3.94995	9.00535	8.46071	0	8.04604	22.9706	5.0051	3.272	29.3586	75.0403	34.3052	21.2594	73.5884	4.61006	31.7652	66.3538	83.7454	31.0554	11.4296	21.6802
ENSG00000108773	KAT2A	lysine acetyltransferase 2A [Source:HGNC Symbol;Acc:HGNC:4201]	2648	1190.16	1303.78	1050.73	-1.03763	0.59693	-2.05285	0.00195879	0.0488658	protein_coding	17	42113111	42121367	-1	1461.92	1476.97	1384.72	1346.25	1292.05	1581.73	1218.52	1274.46	716.4	877.71	1304.01	1512.02	1278.98	1296.37	909.541	2492.83	1465.06	805.223	1379.77	1345.37	959.515	1354.85	275.148	1876.35	1898.16	998.043	1349.6	1454.14	612.39	650.091	1082.8	946.367	2181.95
ENSG00000119508	NR4A3	nuclear receptor subfamily 4 group A member 3 [Source:HGNC Symbol;Acc:HGNC:7982]	8013	3514.99	661.579	7044.55	3.03724	1.11773	8.2092	0.00198606	0.0494185	protein_coding	9	99821855	99866891	1	482.864	264.079	2165.45	76.2813	34.7654	624.861	85.0663	10.3856	766.887	2441.91	18.035	486.245	1780.23	17.3798	1205.72	46.1493	33.8339	752.614	1290.18	1211.23	98.9781	10869.2	6263.78	3843.67	1474.49	16132.7	629.274	4003.6	13149.1	9798.21	6484.36	2841.39	1847.46
ENSG00000020181	ADGRA2	adhesion G protein-coupled receptor A2 [Source:HGNC Symbol;Acc:HGNC:17849]	25960	208.423	267.353	135.735	-1.32847	1.40782	-2.51135	0.00201297	0.0498338	protein_coding	8	37784191	37844896	1	113.335	378.591	290.669	225.268	363.606	625.677	278.956	383.772	32.2075	73.6206	237.591	156.531	419.584	383.145	200.119	120.757	449.508	162.159	130.932	417.425	170.962	219.646	58.3647	120.814	31.8891	231.497	225.893	165.885	98.1483	174.588	78.6736	283.453	58.8462
ENSG00000049089	COL9A2	collagen type IX alpha 2 chain [Source:HGNC Symbol;Acc:HGNC:2218]	1298	351.592	420.023	267.289	-1.14447	0.739473	-2.21064	0.00202032	0.0499524	protein_coding	1	40300489	40317813	-1	224.765	575.676	435.032	540.524	458.495	733.356	118.02	444.602	78.3426	246.677	363.052	419.636	391.861	252.007	235.14	713.007	458.101	442.532	343.793	426.434	919.433	354.478	191.77	280.408	343.187	413.935	316.942	388.242	384.299	334.982	349.891	230.877	264.808
[truncated: 5 more columns]
