# Supplementary material for: Landscape of Bone Marrow Metastasis in Human Neuroblastoma Unraveled by Transcriptomics and Deep Multiplex Imaging
Source: Cancers (Basel). 2021 Aug 26;13(17):4311. doi: 10.3390/cancers13174311 (PMC8431445; doi:10.3390/cancers13174311)
Supplement: Supplementary file 1 [file cancers-13-04311-s001.zip › cancers-1331004 - SUPPLMENTARY/Table_S11.xlsx]

## Sheet: hallmark
ID	Description	setSize	enrichmentScore	NES	pvalue	p.adjust	qvalues	rank	leading_edge	core_enrichment	core_enrichment_symbols
HALLMARK_TNFA_SIGNALING_VIA_NFKB	HALLMARK_TNFA_SIGNALING_VIA_NFKB	193	0.86669	2.4995	4.73076e-35	2.36538e-33	1.24494e-33	1108	tags=51%, list=7%, signal=48%	6364/3552/3553/2921/5743/7130/3433/5055/2152/6351/9242/2920/4973/2919/3604/9034/6648/8013/56937/2669/6347/3914/51561/1906/597/7185/1846/5329/3383/55332/127544/8870/64135/80176/941/1435/4790/5142/7124/5209/3601/10318/6515/4791/4780/5328/595/6385/23586/10938/330/329/9334/8877/4814/10135/960/2643/1880/7422/7128/1326/23135/1844/57007/6303/9322/5806/3976/25816/23258/11182/4084/490/6890/8942/7050/79155…	CCL20/IL1A/IL1B/CXCL3/PTGS2/TNFAIP6/IFIT2/SERPINB2/F3/CCL4/MSC/CXCL2/OLR1/CXCL1/TNFRSF9/CCRL2/SOD2/NR4A3/PMEPA1/GEM/CCL2/LAMB3/IL23A/EDN1/BCL2A1/TRAF1/DUSP4/PLAUR/ICAM1/DRAM1/RNF19B/IER3/IFIH1/SPSB1/CD80/CSF1/NFKB1/PDE4B/TNF/PFKFB3/IL15RA/TNIP1/SLC2A3/NFKB2/NFE2L2/PLAU/CCND1/SDC4/DDX58/EHD1/BIRC3/BIRC2/B4GALT5/SPHK1/NINJ1/NAMPT/CD44/GCH1/GPR183/VEGFA/TNFAIP3/MAP3K8/KDM6B/DUSP2/ACKR3/SAT1/TRIP10/P…
HALLMARK_INFLAMMATORY_RESPONSE	HALLMARK_INFLAMMATORY_RESPONSE	174	0.842481	2.41062	8.22529e-26	2.05632e-24	1.08228e-24	1300	tags=47%, list=8%, signal=43%	6364/3552/3553/3696/7130/2152/6354/4973/3576/27074/5996/2069/3656/366/6506/3604/9034/4283/3269/10203/6367/6347/3554/970/1906/5329/3383/29933/114548/1435/4790/5142/4323/7098/3759/64108/1236/3601/3586/3732/8877/7133/10135/2643/1880/6004/3665/7076/136/9435/3976/255488/8743/4084/490/2769/558/6541/3659/1604/3460/10663/10148/9111/4891/27032/5610/9966/8578/4049/55829/4792/7855/3949/2014/3560/92/23533/39…	CCL20/IL1A/IL1B/ITGB8/TNFAIP6/F3/CCL7/OLR1/CXCL8/LAMP3/RGS1/EREG/IRAK2/AQP9/SLC1A2/TNFRSF9/CCRL2/CXCL9/HRH1/CALCRL/CCL22/CCL2/IL1R1/CD70/EDN1/PLAUR/ICAM1/GPR132/NLRP3/CSF1/NFKB1/PDE4B/MMP14/TLR3/KCNJ2/RTP4/CCR7/IL15RA/IL10/CD82/SPHK1/TNFRSF1B/NAMPT/GCH1/GPR183/RGS16/IRF7/TIMP1/ADORA2B/CHST2/LIF/RNF144B/TNFSF10/MXD1/ATP2B1/GNA15/AXL/SLC7A1/IRF1/CD55/IFNGR2/CXCR6/EBI3/NMI/SLC11A2/ATP2C1/EIF2AK2/TNF…
HALLMARK_INTERFERON_GAMMA_RESPONSE	HALLMARK_INTERFERON_GAMMA_RESPONSE	191	0.803907	2.31634	6.60735e-21	1.10122e-19	5.79592e-20	1322	tags=42%, list=9%, signal=39%	5743/7130/3433/3437/629/6354/29126/8638/9636/6648/4283/129607/6347/11274/3383/64135/8651/85441/6775/4790/5142/4599/64108/3601/4600/55008/23586/6737/355/10135/57169/5359/2643/79132/10561/6772/7128/115361/3665/87178/7903/51735/94240/8743/6890/5371/10906/80830/3659/27348/3669/840/1439/4860/256586/836/9111/669/6774/23424/10797/84159/5770/4939/5610/10379/103/84888/7706/9021/4792/4615/5214/3560/3430/39…	PTGS2/TNFAIP6/IFIT2/IFIT3/CFB/CCL7/CD274/OASL/ISG15/SOD2/CXCL9/CMPK2/CCL2/USP18/ICAM1/IFIH1/SOCS1/HELZ2/STAT4/NFKB1/PDE4B/MX1/RTP4/IL15RA/MX2/HERC6/DDX58/TRIM21/FAS/NAMPT/ZNFX1/PLSCR1/GCH1/DHX58/IFI44/STAT1/TNFAIP3/GBP4/IRF7/PNPT1/ST8SIA4/RAPGEF6/EPSTI1/TNFSF10/TAP1/PML/TRAFD1/APOL6/IRF1/TOR1B/ISG20/CASP7/CSF2RB/PNP/LYSMD2/CASP3/NMI/BPGM/STAT3/TDRD7/MTHFD2/ARID5B/PTPN1/OAS2/EIF2AK2/IRF9/ADAR/SPPL…
HALLMARK_INTERFERON_ALPHA_RESPONSE	HALLMARK_INTERFERON_ALPHA_RESPONSE	92	0.820864	2.20737	1.8398e-11	2.29975e-10	1.2104e-10	1322	tags=48%, list=9%, signal=44%	3433/3437/8638/27074/9636/9034/129607/11274/54809/64135/85441/1435/4599/64108/55281/55008/135112/6737/5359/79132/10561/115361/3665/2634/87178/94240/6890/10906/3659/83666/3669/9111/23424/1267/5610/10379/103/7706/3430/2766/219285/1997/85363/7453	IFIT2/IFIT3/OASL/LAMP3/ISG15/CCRL2/CMPK2/USP18/SAMD9/IFIH1/HELZ2/CSF1/MX1/RTP4/TMEM140/HERC6/NCOA7/TRIM21/PLSCR1/DHX58/IFI44/GBP4/IRF7/GBP2/PNPT1/EPSTI1/TAP1/TRAFD1/IRF1/PARP9/ISG20/NMI/TDRD7/CNP/EIF2AK2/IRF9/ADAR/TRIM25/IFI35/GMPR/SAMD9L/ELF1/TRIM5/WARS1
HALLMARK_IL6_JAK_STAT3_SIGNALING	HALLMARK_IL6_JAK_STAT3_SIGNALING	78	0.816606	2.15357	2.98655e-10	2.98655e-09	1.57187e-09	1274	tags=38%, list=8%, signal=35%	3553/2921/64109/3559/6354/2919/4283/3554/8651/1435/7124/3601/355/7133/960/6772/1326/3563/3659/3460/1439/10148/6774/5770/1438/10379/9021/4615/7040/23533	IL1B/CXCL3/CRLF2/IL2RA/CCL7/CXCL1/CXCL9/IL1R1/SOCS1/CSF1/TNF/IL15RA/FAS/TNFRSF1B/CD44/STAT1/MAP3K8/IL3RA/IRF1/IFNGR2/CSF2RB/EBI3/STAT3/PTPN1/CSF2RA/IRF9/SOCS3/MYD88/TGFB1/PIK3R5
HALLMARK_KRAS_SIGNALING_UP	HALLMARK_KRAS_SIGNALING_UP	163	0.700799	1.9944	8.89365e-09	7.41137e-08	3.90072e-08	1444	tags=27%, list=9%, signal=25%	6364/3553/5743/6590/29106/629/2069/27299/51129/7185/5329/8808/25907/8854/23136/7035/5328/330/639/7133/56729/7128/6004/30001/1636/3976/2995/101/669/10418/219333/760/1438/650/6616/5243/26499/54462/3783/719/9949/6324/23645/6696	CCL20/IL1B/PTGS2/SLPI/SCG3/CFB/EREG/ADAMDEC1/ANGPTL4/TRAF1/PLAUR/IL1RL2/TMEM158/ALDH1A2/EPB41L3/TFPI/PLAU/BIRC3/PRDM1/TNFRSF1B/RETN/TNFAIP3/RGS16/ERO1A/ACE/LIF/GYPC/ADAM8/BPGM/SPON1/USP12/CA2/CSF2RA/BMP2/SNAP25/ABCB1/PLEK2/CCSER2/KCNN4/C3AR1/AMMECR1/SCN1B/PPP1R15A/SPP1
HALLMARK_IL2_STAT5_SIGNALING	HALLMARK_IL2_STAT5_SIGNALING	190	0.671787	1.93483	2.37706e-08	1.6979e-07	8.93632e-08	2176	tags=37%, list=14%, signal=32%	3559/3604/7293/8530/7185/9173/8651/64116/64866/1233/1435/23413/10538/6515/3586/7133/5359/960/3099/29851/6004/1326/115361/8784/3685/3976/23258/4582/3563/8743/4084/200734/5033/9446/56990/4860/5045/836/214/64332/57045/760/8553/6484/650/7494/659/3560/5243/10924/123/6696/9308/22822/58528/2151/285172/9144/3682/3566/26018/10970/5025/23764/2012/64375/10397/55509/23710/6095/10075	IL2RA/TNFRSF9/TNFRSF4/CST7/TRAF1/IL1RL1/SOCS1/SLC39A8/CDCP1/CCR4/CSF1/NCS1/BATF/SLC2A3/IL10/TNFRSF1B/PLSCR1/CD44/HK2/ICOS/RGS16/MAP3K8/GBP4/TNFRSF18/ITGAV/LIF/DENND5A/MUC1/IL3RA/TNFSF10/MXD1/SPRED2/P4HA1/GSTO1/CDC42SE2/PNP/FURIN/CASP3/ALCAM/NFKBIZ/TWSG1/CA2/BHLHE40/ST3GAL4/BMP2/XBP1/BMPR2/IL2RB/ABCB1/SMPDL3A/PLIN2/SPP1/CD83/PHLDA1/RRAGD/F2RL2/FAM126B/SYNGR2/ITGAE/IL4R/LRIG1/CKAP4/P2RX4/MAFF/EMP1/…
HALLMARK_ALLOGRAFT_REJECTION	HALLMARK_ALLOGRAFT_REJECTION	182	0.669657	1.92233	3.19567e-08	1.99729e-07	1.05121e-07	1415	tags=25%, list=9%, signal=23%	3553/3589/6351/3559/6354/2069/4283/6367/6347/356/1991/3383/114548/941/8651/6775/1435/5552/7124/7098/2833/3586/355/6772/3665/2634/7076/3976/7903/6890/8560/3460/3458/2589/7042/43/3625/7040/3560/92/3937/3105/7453/7186/3702	IL1B/IL11/CCL4/IL2RA/CCL7/EREG/CXCL9/CCL22/CCL2/FASLG/ELANE/ICAM1/NLRP3/CD80/SOCS1/STAT4/CSF1/SRGN/TNF/TLR3/CXCR3/IL10/FAS/STAT1/IRF7/GBP2/TIMP1/LIF/ST8SIA4/TAP1/DEGS1/IFNGR2/IFNG/GALNT1/TGFB2/ACHE/INHBB/TGFB1/IL2RB/ACVR2A/LCP2/HLA-A/WARS1/TRAF2/ITK
HALLMARK_COMPLEMENT	HALLMARK_COMPLEMENT	182	0.664123	1.90645	6.07573e-08	3.3754e-07	1.77653e-07	1856	tags=26%, list=12%, signal=23%	5055/29106/629/2152/7980/4973/2919/718/9732/5329/1514/4323/10938/151/6714/5359/7128/3665/7076/8942/3659/5641/1604/54331/840/836/760/308/6935/1509/3920/23533/3937/837/5663/9097/5516/10125/7941/3958/2773/1848/51056/5341/1847/341/2157	SERPINB2/SCG3/CFB/F3/TFPI2/OLR1/CXCL1/C3/DOCK4/PLAUR/CTSL/MMP14/EHD1/ADRA2B/SRC/PLSCR1/TNFAIP3/IRF7/TIMP1/KYNU/IRF1/LGMN/CD55/GNG2/CASP7/CASP3/CA2/ANXA5/ZEB1/CTSD/LAMP2/PIK3R5/LCP2/CASP4/PSEN1/USP14/PPP2CB/RASGRP1/PLA2G7/LGALS3/GNAI3/DUSP6/LAP3/PLEK/DUSP5/APOC1/F8
HALLMARK_HEME_METABOLISM	HALLMARK_HEME_METABOLISM	190	0.652252	1.87857	2.39245e-07	1.19622e-06	6.29592e-07	3118	tags=52%, list=20%, signal=42%	5909/23657/718/9911/1193/54855/80148/6513/2995/10133/6386/55030/7037/51573/2908/669/682/1182/4891/9663/9562/665/22936/4601/6536/2729/760/6535/8301/51312/2235/3920/54498/23365/4354/23762/8273/27102/23351/996/6005/1371/6583/114625/4779/571/8031/66008/51274/55532/759/6886/6521/140609/220972/9091/7145/56180/3145/11163/2039/51218/25793/9429/847/26130/6917/4140/80853/25897/23039/2993/23568/115201/9258/…	RAP1GAP/SLC7A11/C3/TMCC2/CLIC2/TENT5C/SLC66A2/SLC2A1/GYPC/OPTN/SDCBP/FBXO34/TFRC/GDE1/NR3C1/BPGM/BSG/CLCN3/SLC11A2/LPIN2/MINPP1/BNIP3L/ELL2/MXI1/SLC6A9/GCLC/CA2/SLC6A8/PICALM/SLC25A37/FECH/LAMP2/SMOX/ARHGEF12/MPP1/OSBP2/SLC10A3/EIF2AK1/KHNYN/CDC27/RHAG/CPOX/SLC22A4/ERMAP/NFE2L1/NA/NCOA4/TRAK2/KLF3/SLC30A10/CA1/TAL1/SLC4A1/NEK7/MARCHF8/PIGQ/TNS1/MOSPD1/HMBS/NUDT4/DMTN/GLRX5/FBXO7/ABCG2/CAT/GAPVD1/…
HALLMARK_APOPTOSIS	HALLMARK_APOPTOSIS	153	0.657333	1.86077	3.47774e-06	1.58079e-05	8.31995e-06	1350	tags=23%, list=9%, signal=21%	3552/3553/2069/6648/356/8870/9638/7124/595/330/355/960/2643/1491/7076/6303/6309/8743/637/6890/2769/3659/3669/840/8837/836/665/8900/650/7042/8682/837/5663/27250/8878	IL1A/IL1B/EREG/SOD2/FASLG/IER3/NA/TNF/CCND1/BIRC3/FAS/CD44/GCH1/CTH/TIMP1/SAT1/SC5D/TNFSF10/BID/TAP1/GNA15/IRF1/ISG20/CASP7/CFLAR/CASP3/BNIP3L/CCNA1/BMP2/TGFB2/PEA15/CASP4/PSEN1/PDCD4/SQSTM1
HALLMARK_COAGULATION	HALLMARK_COAGULATION	102	0.677651	1.84398	4.14044e-05	0.000172518	9.07991e-05	1856	tags=24%, list=12%, signal=21%	5055/629/2152/7980/4973/718/7057/4323/5328/7076/5641/378/5045/3920/8309/11072/2151/553115/9948/1848/5341/5624/341/2157	SERPINB2/CFB/F3/TFPI2/OLR1/C3/THBS1/MMP14/PLAU/TIMP1/LGMN/ARF4/FURIN/LAMP2/ACOX2/DUSP14/F2RL2/PEF1/WDR1/DUSP6/PLEK/PROC/APOC1/F8
HALLMARK_MTORC1_SIGNALING	HALLMARK_MTORC1_SIGNALING	199	0.592798	1.71317	8.91717e-05	0.000342968	0.000180509	2626	tags=33%, list=17%, signal=28%	23657/112399/8140/205/1717/6515/3638/5352/10135/3099/57761/116496/3939/30001/1491/6513/5230/54541/6309/5033/5641/79602/7037/4860/10797/54843/2729/6509/8553/3157/2805/5163/7494/7184/2821/3949/2597/134429/7296/2023/7453/7167/8878/23645/6503/8894/6745/9695/5704/900/3145/821/27230/51377/6917/6510/586/6184/29110/3156/5684/5718/27071/6713/10213/2632	SLC7A11/EGLN3/SLC7A5/AK4/DHCR7/SLC2A3/INSIG1/PLOD2/NAMPT/HK2/TRIB3/NIBAN1/LDHA/ERO1A/CTH/SLC2A1/PGK1/DDIT4/SC5D/P4HA1/LGMN/ADIPOR2/TFRC/PNP/MTHFD2/SYTL2/GCLC/SLC1A4/BHLHE40/HMGCS1/GOT1/PDK1/XBP1/HSP90B1/GPI/LDLR/GAPDH/STARD4/TXNRD1/ENO1/WARS1/TPI1/SQSTM1/PPP1R15A/SLA/EIF2S2/SSR1/EDEM1/PSMC4/CCNG1/HMBS/CANX/SERP1/UCHL5/TCEA1/SLC1A5/BCAT1/RPN1/TBK1/HMGCR/PSMA3/PSMD12/DAPP1/SQLE/PSMD14/GBE1
HALLMARK_P53_PATHWAY	HALLMARK_P53_PATHWAY	187	0.599131	1.72374	0.000104766	0.000368811	0.000194111	1215	tags=19%, list=8%, signal=18%	3552/23657/55332/127544/8870/8651/3732/355/8877/4814/64065/5784/57761/26355/6004/6303/3714/3976/5900/54541/4084/6890/10906/8848/4851/22824/5564/2040/29948/64782/650/1509/10769/3625/7040/4071	IL1A/SLC7A11/DRAM1/RNF19B/IER3/SOCS1/CD82/FAS/SPHK1/NINJ1/PERP/PTPN14/TRIB3/FAM162A/RGS16/SAT1/JAG2/LIF/RALGDS/DDIT4/MXD1/TAP1/TRAFD1/TSC22D1/NOTCH1/HSPA4L/PRKAB1/STOM/OSGIN1/AEN/BMP2/CTSD/PLK2/INHBB/TGFB1/TM4SF1
HALLMARK_HYPOXIA	HALLMARK_HYPOXIA	176	0.607379	1.73913	0.000110643	0.000368811	0.000194111	1763	tags=27%, list=12%, signal=24%	2152/51129/771/5329/8870/205/3036/5209/6515/6385/3099/7422/26355/3939/7128/30001/57007/6513/136/9435/5230/54541/8277/5033/3669/10957/2908/6518/665/4601/8553/5163/25824/2821/2997/5214/2597/23327/2023/123/7167/23645/272/58528/26118/3098/3516/10370	F3/ANGPTL4/CA12/PLAUR/IER3/AK4/HAS1/PFKFB3/SLC2A3/SDC4/HK2/VEGFA/FAM162A/LDHA/TNFAIP3/ERO1A/ACKR3/SLC2A1/ADORA2B/CHST2/PGK1/DDIT4/TKTL1/P4HA1/ISG20/PNRC1/NR3C1/SLC2A5/BNIP3L/MXI1/BHLHE40/PDK1/PRDX5/GPI/GYS1/PFKP/GAPDH/NEDD4L/ENO1/PLIN2/TPI1/PPP1R15A/AMPD3/RRAGD/WSB1/HK1/RBPJ/CITED2
HALLMARK_EPITHELIAL_MESENCHYMAL_TRANSITION	HALLMARK_EPITHELIAL_MESENCHYMAL_TRANSITION	170	0.602493	1.72081	0.000195463	0.000610821	0.000321485	1557	tags=25%, list=10%, signal=23%	7980/3576/2919/26585/56937/2669/3908/5329/7057/4323/10409/6385/355/5352/960/7422/7128/7076/6303/3685/5806/4016/4147/1809/6535/3487/3688/3909/7431/2014/10516/7040/5768/1314/4853/2882/7474/2006/290/6696/5479/7049/10979	TFPI2/CXCL8/CXCL1/GREM1/PMEPA1/GEM/LAMA2/PLAUR/THBS1/MMP14/BASP1/SDC4/FAS/PLOD2/CD44/VEGFA/TNFAIP3/TIMP1/SAT1/ITGAV/PTX3/LOXL1/MATN2/DPYSL3/SLC6A8/IGFBP4/ITGB1/LAMA3/VIM/EMP3/FBLN5/TGFB1/QSOX1/COPA/NOTCH2/GPX7/WNT5A/ELN/ANPEP/SPP1/PPIB/TGFBR3/FERMT2
HALLMARK_XENOBIOTIC_METABOLISM	HALLMARK_XENOBIOTIC_METABOLISM	159	0.601068	1.70691	0.000224661	0.000660768	0.000347773	1169	tags=18%, list=8%, signal=16%	629/5909/366/3554/384/51733/4355/57406/355/4814/2643/9060/4864/8942/9446/211/5467/51635/9663/2729/760/9361/3487/7042/5447/2114/54498/7009	CFB/RAP1GAP/AQP9/IL1R1/ARG2/UPB1/MPP2/ABHD6/FAS/NINJ1/GCH1/PAPSS2/NPC1/KYNU/GSTO1/ALAS1/PPARD/DHRS7/LPIN2/GCLC/CA2/LONP1/IGFBP4/TGFB2/POR/ETS2/SMOX/TMBIM6
HALLMARK_PROTEIN_SECRETION	HALLMARK_PROTEIN_SECRETION	92	0.60178	1.61823	0.00568411	0.0150519	0.00792207	2502	tags=40%, list=16%, signal=34%	664/7251/1182/2803/8775/26286/5868/2581/372/6845/9554/286451/3920/3998/9367/1176/1213/8546/51606/57403/6197/9276/10565/967/476/23033/8027/163/9570/81542/10959/259230/1315/9871/538/3382/23673	BNIP3/TSG101/CLCN3/GOLGA4/NAPA/ARFGAP3/RAB5A/GALC/ARCN1/VAMP7/SEC22B/YIPF6/LAMP2/LMAN1/RAB9A/AP3S1/CLTC/AP3B1/ATP6V1H/RAB22A/RPS6KA3/COPB2/ARFGEF1/CD63/ATP1A1/DOP1A/STAM/AP2B1/GOSR2/TMX1/TMED2/SGMS1/COPB1/SEC24D/ATP7A/ICA1/STX12
HALLMARK_UV_RESPONSE_UP	HALLMARK_UV_RESPONSE_UP	148	0.547583	1.54575	0.00571973	0.0150519	0.00792207	2364	tags=30%, list=15%, signal=26%	2920/6648/3383/4323/5979/2643/6782/27161/637/6890/3659/211/7037/5045/836/682/1267/9818/2907/760/10105/6535/6897/650/4792/7009/5243/9/8878/10125/4885/5873/9296/997/8804/694/528/6236/55937/51083/4067/6184/3301/3164/2026	CXCL2/SOD2/ICAM1/MMP14/RET/GCH1/HSPA13/AGO2/BID/TAP1/IRF1/ALAS1/TFRC/FURIN/CASP3/BSG/CNP/NUP58/GRINA/CA2/PPIF/SLC6A8/TARS1/BMP2/NFKBIA/TMBIM6/ABCB1/NAT1/SQSTM1/RASGRP1/NPTX2/RAB27A/ATP6V1F/CDC34/CREG1/BTG1/ATP6V1C1/RRAD/APOM/GAL/LYN/RPN1/DNAJA1/NR4A1/ENO2
HALLMARK_GLYCOLYSIS	HALLMARK_GLYCOLYSIS	178	0.512893	1.46983	0.0108002	0.0270004	0.0142107	1522	tags=20%, list=10%, signal=18%	112399/51129/8870/205/9456/5352/375790/960/3099/7422/26355/9123/3939/30001/1491/136/9435/5230/54541/8277/5033/1738/5223/3669/4601/2729/2805/2997/5214/5768/2023/7167/5516/9276/50814/58528	EGLN3/ANGPTL4/IER3/AK4/HOMER1/PLOD2/AGRN/CD44/HK2/VEGFA/FAM162A/SLC16A3/LDHA/ERO1A/CTH/ADORA2B/CHST2/PGK1/DDIT4/TKTL1/P4HA1/DLD/PGAM1/ISG20/MXI1/GCLC/GOT1/GYS1/PFKP/QSOX1/ENO1/TPI1/PPP2CB/COPB2/NSDHL/RRAGD
HALLMARK_TGF_BETA_SIGNALING	HALLMARK_TGF_BETA_SIGNALING	53	0.642307	1.61133	0.0123716	0.0294561	0.0155032	1432	tags=26%, list=9%, signal=24%	56937/7057/8412/6497/6498/7050/3460/5045/7046/650/659/7040/324/23645	PMEPA1/THBS1/NA/SKI/SKIL/TGIF1/IFNGR2/FURIN/TGFBR1/BMP2/BMPR2/TGFB1/APC/PPP1R15A
HALLMARK_ANDROGEN_RESPONSE	HALLMARK_ANDROGEN_RESPONSE	93	0.570753	1.53689	0.0147897	0.0336129	0.017691	2491	tags=33%, list=16%, signal=28%	56937/595/3638/6303/3685/25816/8848/1836/6675/84159/11057/22936/57178/3157/23585/3998/4189/6197/8031/2773/56172/2547/9455/4094/10397/9871/6611/2683/11047/3156/567	PMEPA1/CCND1/INSIG1/SAT1/ITGAV/TNFAIP8/TSC22D1/SLC26A2/UAP1/ARID5B/ABHD2/ELL2/ZMIZ1/HMGCS1/TMEM50A/LMAN1/DNAJB9/RPS6KA3/NCOA4/GNAI3/ANKH/XRCC6/HOMER2/MAF/NDRG1/SEC24D/SMS/B4GALT1/ADRM1/HMGCR/B2M
HALLMARK_ESTROGEN_RESPONSE_LATE	HALLMARK_ESTROGEN_RESPONSE_LATE	163	0.509314	1.44945	0.0170404	0.0370444	0.0194971	1362	tags=18%, list=9%, signal=17%	7980/771/8140/1717/5979/10538/595/64065/960/9060/1844/8645/4681/1836/3669/11001/11057/64215/6990/55806/22824/760/10105/8900/6509/3487/7494/2109/27250/8309	TFPI2/CA12/SLC7A5/DHCR7/RET/BATF/CCND1/PERP/CD44/PAPSS2/DUSP2/KCNK5/NA/SLC26A2/ISG20/SLC27A2/ABHD2/DNAJC1/DYNLT3/HR/HSPA4L/CA2/PPIF/CCNA1/SLC1A4/IGFBP4/XBP1/ETFB/PDCD4/ACOX2
HALLMARK_ANGIOGENESIS	HALLMARK_ANGIOGENESIS	31	0.678666	1.56871	0.0271678	0.0565995	0.0297892	1724	tags=35%, list=11%, signal=32%	4973/7422/7076/3685/3714/4043/6696/5553/5154/2260/5747	OLR1/VEGFA/TIMP1/ITGAV/JAG2/LRPAP1/SPP1/PRG2/PDGFA/FGFR1/PTK2
HALLMARK_APICAL_SURFACE	HALLMARK_APICAL_SURFACE	34	0.656489	1.54036	0.0336733	0.0673466	0.0354456	1282	tags=21%, list=8%, signal=19%	51458/27076/5329/79602/6517/3560/202	RHCG/LYPD3/PLAUR/ADIPOR2/SLC2A4/IL2RB/CRYBG1
HALLMARK_CHOLESTEROL_HOMEOSTASIS	HALLMARK_CHOLESTEROL_HOMEOSTASIS	68	0.553473	1.43409	0.0508392	0.0977677	0.0514567	1608	tags=29%, list=10%, signal=26%	5329/1717/22809/118429/5359/57761/116496/6309/5641/10957/214/6721/308/3157/3949/134429/5468/26270/50814/3958	PLAUR/DHCR7/ATF5/ANTXR2/PLSCR1/TRIB3/NIBAN1/SC5D/LGMN/PNRC1/ALCAM/SREBF2/ANXA5/HMGCS1/LDLR/STARD4/PPARG/FBXO6/NSDHL/LGALS3
HALLMARK_UNFOLDED_PROTEIN_RESPONSE	HALLMARK_UNFOLDED_PROTEIN_RESPONSE	110	0.503003	1.37931	0.0564149	0.104472	0.0549853	2264	tags=26%, list=15%, signal=23%	6347/64859/8140/7422/30001/54541/5393/10797/6509/6897/2081/57472/7494/7184/4189/22926/55033/1965/27257/6745/79094/9695/3376/9570/6734/4850/27230/55062/23517	CCL2/NABP1/SLC7A5/VEGFA/ERO1A/DDIT4/EXOSC9/MTHFD2/SLC1A4/TARS1/ERN1/CNOT6/XBP1/HSP90B1/DNAJB9/ATF6/FKBP14/EIF2S1/LSM1/SSR1/CHAC1/EDEM1/IARS1/GOSR2/SRPRA/CNOT4/SERP1/WIPI1/MTREX
HALLMARK_UV_RESPONSE_DN	HALLMARK_UV_RESPONSE_DN	136	0.471972	1.32214	0.0767157	0.136992	0.0721012	2091	tags=25%, list=14%, signal=22%	2152/4790/7035/3638/136/26037/490/2869/773/6541/11343/2908/8871/27032/57178/8553/3949/6310/10516/4363/5468/4853/92/11044/7049/54468/10370/861/23576/140609/29970/6717/3815/2534	F3/NFKB1/TFPI/INSIG1/ADORA2B/SIPA1L1/ATP2B1/GRK5/CACNA1A/SLC7A1/MGLL/NR3C1/SYNJ2/ATP2C1/ZMIZ1/BHLHE40/LDLR/ATXN1/FBLN5/ABCC1/PPARG/NOTCH2/ACVR2A/TENT4A/TGFBR3/MIOS/CITED2/NA/DDAH1/NEK7/SCHIP1/SRI/KIT/FYN
HALLMARK_ADIPOGENESIS	HALLMARK_ADIPOGENESIS	189	0.439219	1.26438	0.0980827	0.169108	0.0890043	1561	tags=17%, list=10%, signal=15%	718/51129/64859/1717/5209/65124/56729/137964/23187/1738/10010/23786/79602/11343/51635/27069/2040/10580/5447/5004/7532/2109/4189/977/5468/9908/55177/123/27250/6776/5168/6239	C3/ANGPTL4/NABP1/DHCR7/PFKFB3/SOWAHC/RETN/GPAT4/PHLDB1/DLD/TANK/BCL2L13/ADIPOR2/MGLL/DHRS7/GHITM/STOM/SORBS1/POR/ORM1/YWHAG/ETFB/DNAJB9/CD151/PPARG/G3BP2/RMDN3/PLIN2/PDCD4/STAT5A/ENPP2/RREB1
HALLMARK_KRAS_SIGNALING_DN	HALLMARK_KRAS_SIGNALING_DN	113	0.468248	1.28746	0.110431	0.184052	0.0968697	1011	tags=12%, list=7%, signal=12%	5055/27076/1906/941/4599/6498/54855/9435/57089/3458/6712/8900/3955/7042	SERPINB2/LYPD3/EDN1/CD80/MX1/SKIL/TENT5C/CHST2/ENTPD7/IFNG/SPTBN2/CCNA1/LFNG/TGFB2
HALLMARK_PANCREAS_BETA_CELLS	HALLMARK_PANCREAS_BETA_CELLS	17	0.651369	1.36966	0.136438	0.215296	0.113314	1814	tags=24%, list=12%, signal=21%	3642/5063/7421/6812	INSM1/PAK3/VDR/STXBP1
HALLMARK_ESTROGEN_RESPONSE_EARLY	HALLMARK_ESTROGEN_RESPONSE_EARLY	169	0.430658	1.22961	0.137789	0.215296	0.113314	1359	tags=18%, list=9%, signal=16%	771/55638/8140/1717/5979/595/23541/960/9060/6513/4582/3983/55686/8645/4681/375449/1836/60436/11001/11057/6990/55806/10105/6509/8553/3487/7494/3625/1997/10125	CA12/SYBU/SLC7A5/DHCR7/RET/CCND1/SEC14L2/CD44/PAPSS2/SLC2A1/MUC1/ABLIM1/MREG/KCNK5/NA/MAST4/SLC26A2/TGIF2/SLC27A2/ABHD2/DYNLT3/HR/PPIF/SLC1A4/BHLHE40/IGFBP4/XBP1/INHBB/ELF1/RASGRP1
HALLMARK_BILE_ACID_METABOLISM	HALLMARK_BILE_ACID_METABOLISM	88	0.461634	1.23528	0.170323	0.251191	0.132206	1177	tags=14%, list=8%, signal=13%	366/654/23460/8412/4864/10133/5193/11001/25824/6310/4734/2180	AQP9/BMP6/ABCA6/NA/NPC1/OPTN/PEX12/SLC27A2/PRDX5/ATXN1/NEDD4/ACSL1
HALLMARK_REACTIVE_OXYGEN_SPECIES_PATHWAY	HALLMARK_REACTIVE_OXYGEN_SPECIES_PATHWAY	49	0.511034	1.26761	0.17081	0.251191	0.132206	2347	tags=31%, list=15%, signal=26%	6648/22904/9943/140809/4155/2729/55829/5214/4363/7296/112398/4482/9588/847/7295	SOD2/SBNO2/OXSR1/SRXN1/MBP/GCLC/SELENOS/PFKP/ABCC1/TXNRD1/EGLN2/MSRA/PRDX6/CAT/TXN
HALLMARK_APICAL_JUNCTION	HALLMARK_APICAL_JUNCTION	161	0.410642	1.16744	0.21176	0.302514	0.159218	1195	tags=11%, list=8%, signal=10%	29126/3914/7185/3383/143903/25945/3638/6714/5291/84552/1500/51776/103910/3688/3909/1308/4763	CD274/LAMB3/TRAF1/ICAM1/LAYN/NECTIN3/INSIG1/SRC/PIK3CB/PARD6G/CTNND1/MAP3K20/MYL12B/ITGB1/LAMA3/COL17A1/NF1
HALLMARK_MYOGENESIS	HALLMARK_MYOGENESIS	143	-0.290993	-1.0833	0.255969	0.355512	0.187112	1782	tags=20%, list=12%, signal=18%	2314/1760/8497/203/1728/25937/6709/6525/1489/7249/1974/1384/6300/7169/4684/4638/10014/6261/6876/25970/9463/10174/2548/2273/79629/2027/5664/165/89797	FLII/DMPK/PPFIA4/AK1/NQO1/WWTR1/SPTAN1/SMTN/CTF1/TSC2/EIF4A2/CRAT/MAPK12/TPM2/NCAM1/MYLK/HDAC5/RYR1/TAGLN/SH2B1/PICK1/SORBS3/GAA/FHL1/OCEL1/ENO3/PSEN2/AEBP1/NAV2
HALLMARK_SPERMATOGENESIS	HALLMARK_SPERMATOGENESIS	85	0.412702	1.09934	0.330622	0.446786	0.235151	2187	tags=13%, list=14%, signal=11%	29106/1636/8277/6518/22824/8900/9807/23175/3416/10254/673	SCG3/ACE/TKTL1/SLC2A5/HSPA4L/CCNA1/IP6K1/LPIN1/IDE/STAM2/BRAF
HALLMARK_DNA_REPAIR	HALLMARK_DNA_REPAIR	148	0.379114	1.07018	0.358618	0.471866	0.248351	3014	tags=26%, list=20%, signal=21%	129607/5142/1687/5898/51251/6386/4860/7251/2959/79720/2987/6880/5980/50484/2967/25874/50808/4799/9978/5440/10959/124583/7936/4350/10063/23204/11047/29927/5982/5439/7508/8178/4059/8731/2879/10134/1643/978/5432	CMPK2/PDE4B/GSDME/RALA/NT5C3A/SDCBP/PNP/TSG101/GTF2B/VPS37B/GUK1/TAF9/REV3L/RRM2B/GTF2H3/MPC2/AK3/NFX1/RBX1/POLR2K/TMED2/CANT1/NELFE/MPG/COX17/ARL6IP1/ADRM1/SEC61A1/RFC2/POLR2J/XPC/ELL/BCAM/RNMT/GPX4/BCAP31/DDB2/CDA/POLR2C
HALLMARK_NOTCH_SIGNALING	HALLMARK_NOTCH_SIGNALING	30	0.442925	1.0184	0.45309	0.580884	0.305729	1882	tags=33%, list=12%, signal=29%	595/5467/4851/3955/7855/4853/28514/7474/23291/9978	CCND1/PPARD/NOTCH1/LFNG/FZD5/NOTCH2/DLL1/WNT5A/FBXW11/RBX1
HALLMARK_WNT_BETA_CATENIN_SIGNALING	HALLMARK_WNT_BETA_CATENIN_SIGNALING	38	0.416276	0.993745	0.481678	0.597203	0.314317	1765	tags=26%, list=12%, signal=23%	7471/3714/5467/4851/8650/85407/9794/28514/3516/6868	WNT1/JAG2/PPARD/NOTCH1/NUMB/NKD1/MAML1/DLL1/RBPJ/ADAM17
HALLMARK_PI3K_AKT_MTOR_SIGNALING	HALLMARK_PI3K_AKT_MTOR_SIGNALING	95	0.367036	0.990732	0.489706	0.597203	0.314317	3205	tags=31%, list=21%, signal=24%	356/57761/6513/57521/5163/7184/4615/1213/8878/7186/6197/5571/6503/10298/5599/8737/51719/5781/29110/6773/1977/27071/1026/7132/5606/31/2885/10097/200576	FASLG/TRIB3/SLC2A1/RPTOR/PDK1/HSP90B1/MYD88/CLTC/SQSTM1/TRAF2/RPS6KA3/PRKAG1/SLA/PAK4/MAPK8/RIPK1/CAB39/PTPN11/TBK1/STAT2/EIF4E/DAPP1/CDKN1A/TNFRSF1A/MAP2K3/ACACA/GRB2/ACTR2/PIKFYVE
HALLMARK_PEROXISOME	HALLMARK_PEROXISOME	92	0.344871	0.927384	0.587244	0.6991	0.367947	2923	tags=25%, list=19%, signal=20%	6648/2100/2182/11001/10512/25824/26986/6310/2180/5243/3416/23705/7555/23457/847/390916/216/1022/5828/5195/80270/60481/7533	SOD2/ESR2/ACSL4/SLC27A2/SEMA3C/PRDX5/PABPC1/ATXN1/ACSL1/ABCB1/IDE/CADM1/CNBP/ABCB9/CAT/NUDT19/ALDH1A1/CDK7/PEX2/PEX14/HSD3B7/ELOVL5/YWHAH
HALLMARK_G2M_CHECKPOINT	HALLMARK_G2M_CHECKPOINT	198	0.315157	0.910523	0.653284	0.759632	0.399807	2823	tags=17%, list=18%, signal=14%	8140/595/22809/5371/6541/51776/7486/6760/4082/25/1871/7040/4853/996/4928/5048/11044/2935/602/4502/675/4331/22823/5119/4088/1432/1874/3837/9462/6713/10592/1946/94239/1756	SLC7A5/CCND1/ATF5/PML/SLC7A1/MAP3K20/WRN/SS18/MARCKS/ABL1/E2F3/TGFB1/NOTCH2/CDC27/NUP98/PAFAH1B1/TENT4A/GSPT1/BCL3/MT2A/BRCA2/MNAT1/MTF2/CHMP1A/SMAD3/MAPK14/E2F4/KPNB1/RASAL2/SQLE/SMC2/EFNA5/H2AZ2/DMD
HALLMARK_HEDGEHOG_SIGNALING	HALLMARK_HEDGEHOG_SIGNALING	31	0.363073	0.83923	0.677282	0.769638	0.405073	1195	tags=19%, list=8%, signal=18%	8828/7422/5371/43/2114/4763	NRP2/VEGFA/PML/ACHE/ETS2/NF1
HALLMARK_MITOTIC_SPINDLE	HALLMARK_MITOTIC_SPINDLE	197	0.290626	0.839339	0.776944	0.863272	0.454353	3255	tags=23%, list=21%, signal=19%	9732/51735/10276/151987/79658/23012/9702/9371/6780/4082/25/23365/4763/324/4853/23647/23332/996/394/5048/54509/10565/81/6624/2317/22930/9874/675/23022/4650/4627/2934/6249/9462/4739/8874/84333/5108/8476/253260/9181/22920/2316/11004/11214/7430	DOCK4/RAPGEF6/NET1/PPP4R2/ARHGAP10/STK38L/CEP57/KIF3B/STAU1/MARCKS/ABL1/ARHGEF12/NF1/APC/NOTCH2/ARFIP2/CLASP1/CDC27/ARHGAP5/PAFAH1B1/RHOF/ARFGEF1/ACTN4/FSCN1/FLNB/RAB3GAP1/TLK1/BRCA2/PALLD/MYO9B/MYH9/GSN/CLIP1/RASAL2/NEDD9/ARHGEF7/PCGF5/PCM1/CDC42BPA/RICTOR/ARHGEF2/KIFAP3/FLNA/KIF2C/AKAP13/EZR
HALLMARK_FATTY_ACID_METABOLISM	HALLMARK_FATTY_ACID_METABOLISM	142	0.276749	0.778443	0.843417	0.916758	0.482504	2944	tags=21%, list=19%, signal=17%	259307/3939/1738/2182/79602/11343/4683/57515/760/3157/3052/2180/1371/50814/728294/50486/2110/23710/2194/9588/6611/2026/216/644/1376/6281/1543/60481/7533/39	IL4I1/LDHA/DLD/ACSL4/ADIPOR2/MGLL/NBN/SERINC1/CA2/HMGCS1/HCCS/ACSL1/CPOX/NSDHL/D2HGDH/G0S2/ETFDH/GABARAPL1/FASN/PRDX6/SMS/ENO2/ALDH1A1/BLVRA/CPT2/S100A10/CYP1A1/ELOVL5/YWHAH/ACAT2
HALLMARK_MYC_TARGETS_V2	HALLMARK_MYC_TARGETS_V2	58	0.235729	0.598598	0.961998	0.990465	0.521297	433	tags=3%, list=3%, signal=3%	3099/1844	HK2/DUSP2
HALLMARK_OXIDATIVE_PHOSPHORYLATION	HALLMARK_OXIDATIVE_PHOSPHORYLATION	200	0.22381	0.64701	0.983425	0.990465	0.521297	4772	tags=30%, list=31%, signal=21%	3939/1738/211/840/529/4942/3052/5447/2821/9167/2109/51606/9296/4719/1727/528/8050/2110/10063/4714/10939/9868/4700/2395/4976/2879/9927/9131/4717/51660/4724/3313/537/29088/4835/7386/5264/51318/38/6390/1351/1347/56898/7385/54205/1349/4698/5018/4697/7381/7419/7416/4712/50/1340/515/3030/2271/36	LDHA/DLD/ALAS1/CASP7/ATP6V1E1/OAT/HCCS/POR/GPI/COX7A2L/ETFB/ATP6V1H/ATP6V1F/NDUFS1/CYB5R3/ATP6V1C1/PDHX/ETFDH/COX17/NDUFB8/AFG3L2/TOMM70/NDUFA6/FXN/OPA1/GPX4/MFN2/AIFM1/NDUFC1/MPC1/NDUFS4/HSPA9/ATP6AP1/MRPL15/NQO2/UQCRFS1/PHYH/MRPL35/ACAT1/SDHB/COX8A/COX7A2/BDH2/UQCRC2/CYCS/COX7B/NDUFA5/OXA1L/NDUFA4/UQCRB/VDAC3/VDAC1/NDUFB6/ACO2/COX6B1/ATP5PB/HADHA/FH/ACADSB
HALLMARK_E2F_TARGETS	HALLMARK_E2F_TARGETS	200	-0.193456	-0.750918	0.989925	0.990465	0.521297	4143	tags=23%, list=27%, signal=17%	83463/55646/5558/672/203068/10606/8493/9212/6941/146909/3978/1503/3014/6117/7153/4436/4678/7398/6426/10460/84316/79019/7374/79077/7112/5424/7157/6434/3930/7465/3925/8914/5411/1029/83461/8243/11168/7514/56655/11200/9918/51747/10528/9924/84312/994	MXD3/LYAR/PRIM2/BRCA1/TUBB/PAICS/PPM1D/AURKB/TCF19/KIF18B/LIG1/CTPS1/H2AX/RPA1/TOP2A/MSH2/NASP/USP1/SRSF1/TACC3/NAA38/CENPM/UNG/DCTPP1/TMPO/POLD1/TP53/TRA2B/LBR/WEE1/STMN1/TIMELESS/PNN/CDKN2A/CDCA3/SMC1A/PSIP1/XPO1/POLE4/CHEK2/NCAPD2/LUC7L3/NOP56/PAN2/BRMS1L/CDC25B
HALLMARK_MYC_TARGETS_V1	HALLMARK_MYC_TARGETS_V1	200	0.215927	0.624222	0.990465	0.990465	0.521297	4841	tags=30%, list=32%, signal=21%	3939/5230/3183/26986/8886/1176/1965/7324/8894/2935/3376/5704/5713/2547/7555/821/7411/5093/6637/3837/8669/1977/9868/10213/5690/52/5687/6732/3068/4175/5682/6629/1478/10054/10492/10987/8454/5709/9188/4174/6175/9045/10236/6187/6059/28973/3251/10146/6128/4085/11260/7419/7416/6240/2058/2107/10291/8664/1933/26354/5707	LDHA/PGK1/HNRNPC/PABPC1/DDX18/AP3S1/EIF2S1/UBE2E1/EIF2S2/GSPT1/IARS1/PSMC4/PSMD7/XRCC6/CNBP/CANX/VBP1/PCBP1/SNRPG/KPNB1/EIF3J/EIF4E/TOMM70/PSMD14/PSMB2/ACP1/PSMA6/SRPK1/HDGF/MCM6/PSMA1/SNRPB2/CSTF2/UBA2/SYNCRIP/COPS5/CUL1/PSMD3/DDX21/MCM5/RPLP0/RPL14/HNRNPR/RPS2/ABCE1/MRPS18B/HPRT1/G3BP1/RPL6/MAD2L1/XPOT/VDAC3/VDAC1/RRM1/EPRS1/ETF1/SF3A1/EIF3D/EEF1B2/GNL3/PSMD1

## Sheet: C2_kegg
ID	Description	setSize	enrichmentScore	NES	pvalue	p.adjust	qvalues	rank	leading_edge	core_enrichment	core_enrichment_symbols
KEGG_CYTOKINE_CYTOKINE_RECEPTOR_INTERACTION	KEGG_CYTOKINE_CYTOKINE_RECEPTOR_INTERACTION	179	0.82839	2.3744	1.34277e-23	2.39013e-21	2.07776e-21	1017	tags=31%, list=7%, signal=29%	6364/3552/3553/6355/9560/2921/414062/6348/3589/64109/6351/3559/6354/2920/3576/2919/3604/4283/29949/6367/6347/3554/7293/51561/970/2321/356/1233/1435/7124/2833/8740/1236/3601/3586/355/7133/7422/8784/3976/944/3563/8743/50615/3460/3458/1439/10663/7046/1438/3577/9966/650/7042/4049	CCL20/IL1A/IL1B/CCL8/CCL4L2/CXCL3/CCL3L3/CCL3/IL11/CRLF2/CCL4/IL2RA/CCL7/CXCL2/CXCL8/CXCL1/TNFRSF9/CXCL9/IL19/CCL22/CCL2/IL1R1/TNFRSF4/IL23A/CD70/FLT1/FASLG/CCR4/CSF1/TNF/CXCR3/TNFSF14/CCR7/IL15RA/IL10/FAS/TNFRSF1B/VEGFA/TNFRSF18/LIF/TNFSF8/IL3RA/TNFSF10/IL21R/IFNGR2/IFNG/CSF2RB/CXCR6/TGFBR1/CSF2RA/CXCR1/TNFSF15/BMP2/TGFB2/LTA
KEGG_CHEMOKINE_SIGNALING_PATHWAY	KEGG_CHEMOKINE_SIGNALING_PATHWAY	154	0.716841	2.02912	3.73092e-09	3.32052e-07	2.88655e-07	791	tags=17%, list=5%, signal=16%	6364/6355/9560/2921/414062/6348/6351/6354/2920/3576/2919/4283/6367/6347/2786/1233/4790/2833/1236/5291/6772/2869/54331/10663/6774/1398	CCL20/CCL8/CCL4L2/CXCL3/CCL3L3/CCL3/CCL4/CCL7/CXCL2/CXCL8/CXCL1/CXCL9/CCL22/CCL2/GNG4/CCR4/NFKB1/CXCR3/CCR7/PIK3CB/STAT1/GRK5/GNG2/CXCR6/STAT3/CRK
KEGG_NOD_LIKE_RECEPTOR_SIGNALING_PATHWAY	KEGG_NOD_LIKE_RECEPTOR_SIGNALING_PATHWAY	57	0.806827	2.0452	1.97861e-06	0.000105695	9.18813e-05	418	tags=23%, list=3%, signal=22%	3553/6355/6354/2920/3576/2919/6347/114548/4790/7124/330/329/7128	IL1B/CCL8/CCL7/CXCL2/CXCL8/CXCL1/CCL2/NLRP3/NFKB1/TNF/BIRC3/BIRC2/TNFAIP3
KEGG_APOPTOSIS	KEGG_APOPTOSIS	81	0.74365	1.97256	2.37516e-06	0.000105695	9.18813e-05	1462	tags=32%, list=10%, signal=29%	3552/3553/3656/3554/356/4790/7124/330/329/5291/355/4914/3563/8743/637/840/1439/8837/836/4792/4615/23533/8772/7186/3654/8795	IL1A/IL1B/IRAK2/IL1R1/FASLG/NFKB1/TNF/BIRC3/BIRC2/PIK3CB/FAS/NTRK1/IL3RA/TNFSF10/BID/CASP7/CSF2RB/CFLAR/CASP3/NFKBIA/MYD88/PIK3R5/FADD/TRAF2/IRAK1/TNFRSF10B
KEGG_PATHWAYS_IN_CANCER	KEGG_PATHWAYS_IN_CANCER	276	0.588896	1.73386	3.27547e-06	0.000116607	0.000101367	2115	tags=26%, list=14%, signal=23%	5743/3576/3914/112399/3908/7185/356/7471/4790/9915/5979/4791/595/5898/330/329/5291/355/7422/80326/6772/6513/3685/5900/4914/637/5371/8323/7187/5467/836/54583/7046/6774/1398/1438/8900/650/7042/3688/4792/7855/3909/7184/25/1871/7040/324/5468/23533/7474/8772/7186/6776/8031/83593/112398/5154/2260/5747/5295/2254/861/5599/9978/2122/7483/675/3815/5337/3845	PTGS2/CXCL8/LAMB3/EGLN3/LAMA2/TRAF1/FASLG/WNT1/NFKB1/ARNT2/RET/NFKB2/CCND1/RALA/BIRC3/BIRC2/PIK3CB/FAS/VEGFA/WNT10A/STAT1/SLC2A1/ITGAV/RALGDS/NTRK1/BID/PML/FZD6/TRAF3/PPARD/CASP3/EGLN1/TGFBR1/STAT3/CRK/CSF2RA/CCNA1/BMP2/TGFB2/ITGB1/NFKBIA/FZD5/LAMA3/HSP90B1/ABL1/E2F3/TGFB1/APC/PPARG/PIK3R5/WNT5A/FADD/TRAF2/STAT5A/NCOA4/RASSF5/EGLN2/PDGFA/FGFR1/PTK2/PIK3R1/FGF9/NA/MAPK8/RBX1/MECOM/WNT9A/BRCA2/KIT/…
KEGG_TOLL_LIKE_RECEPTOR_SIGNALING_PATHWAY	KEGG_TOLL_LIKE_RECEPTOR_SIGNALING_PATHWAY	81	0.715784	1.89865	2.20638e-05	0.00065456	0.000569015	1456	tags=30%, list=10%, signal=27%	3553/6348/6351/3576/4283/941/4790/7124/7098/5291/6772/1326/3665/148022/7187/23118/4792/4615/6416/23533/8772/3654/6696/54472	IL1B/CCL3/CCL4/CXCL8/CXCL9/CD80/NFKB1/TNF/TLR3/PIK3CB/STAT1/MAP3K8/IRF7/TICAM1/TRAF3/TAB2/NFKBIA/MYD88/MAP2K4/PIK3R5/FADD/IRAK1/SPP1/TOLLIP
KEGG_JAK_STAT_SIGNALING_PATHWAY	KEGG_JAK_STAT_SIGNALING_PATHWAY	107	0.666128	1.82157	5.38733e-05	0.00136992	0.00119088	1274	tags=24%, list=8%, signal=22%	3589/64109/3559/29949/51561/8651/6775/3601/3586/595/5291/6772/3976/3563/200734/50615/3460/3458/1439/6774/1438/10379/9021/53833/3560/23533	IL11/CRLF2/IL2RA/IL19/IL23A/SOCS1/STAT4/IL15RA/IL10/CCND1/PIK3CB/STAT1/LIF/IL3RA/SPRED2/IL21R/IFNGR2/IFNG/CSF2RB/STAT3/CSF2RA/IRF9/SOCS3/IL20RB/IL2RB/PIK3R5
KEGG_GRAFT_VERSUS_HOST_DISEASE	KEGG_GRAFT_VERSUS_HOST_DISEASE	35	0.807158	1.90494	7.05411e-05	0.00156954	0.00136441	686	tags=23%, list=4%, signal=22%	3552/3553/356/941/7124/355/3812/3458	IL1A/IL1B/FASLG/CD80/TNF/FAS/KIR3DL2/IFNG
KEGG_HEMATOPOIETIC_CELL_LINEAGE	KEGG_HEMATOPOIETIC_CELL_LINEAGE	72	0.71263	1.86438	0.000126539	0.00250267	0.00217559	678	tags=15%, list=4%, signal=15%	3552/3553/3589/3559/3554/1435/7124/960/3563/1604/7037	IL1A/IL1B/IL11/IL2RA/IL1R1/CSF1/TNF/CD44/IL3RA/CD55/TFRC
KEGG_LEISHMANIA_INFECTION	KEGG_LEISHMANIA_INFECTION	66	0.713969	1.84666	0.000270288	0.00481112	0.00418235	1206	tags=24%, list=8%, signal=22%	3552/3553/5743/718/4790/7124/3586/6772/3460/3458/23118/7042/3688/4792/4615/7040	IL1A/IL1B/PTGS2/C3/NFKB1/TNF/IL10/STAT1/IFNGR2/IFNG/TAB2/TGFB2/ITGB1/NFKBIA/MYD88/TGFB1
KEGG_TYPE_I_DIABETES_MELLITUS	KEGG_TYPE_I_DIABETES_MELLITUS	37	0.76615	1.82499	0.00059761	0.00967041	0.00840657	1302	tags=27%, list=9%, signal=25%	3552/3553/356/941/7124/355/3458/4049/5798/3105	IL1A/IL1B/FASLG/CD80/TNF/FAS/IFNG/LTA/PTPRN/HLA-A
KEGG_SMALL_CELL_LUNG_CANCER	KEGG_SMALL_CELL_LUNG_CANCER	76	0.669697	1.76327	0.000728872	0.0108116	0.00939861	1379	tags=22%, list=9%, signal=20%	5743/3914/3908/7185/4790/595/330/329/5291/3685/7187/3688/4792/3909/1871/23533/7186	PTGS2/LAMB3/LAMA2/TRAF1/NFKB1/CCND1/BIRC3/BIRC2/PIK3CB/ITGAV/TRAF3/ITGB1/NFKBIA/LAMA3/E2F3/PIK3R5/TRAF2
KEGG_CYTOSOLIC_DNA_SENSING_PATHWAY	KEGG_CYTOSOLIC_DNA_SENSING_PATHWAY	37	0.756449	1.80188	0.00119522	0.0163653	0.0142265	430	tags=16%, list=3%, signal=16%	3553/9560/6351/4790/23586/3665	IL1B/CCL4L2/CCL4/NFKB1/DDX58/IRF7
KEGG_COMPLEMENT_AND_COAGULATION_CASCADES	KEGG_COMPLEMENT_AND_COAGULATION_CASCADES	44	0.718738	1.75703	0.00203297	0.0258478	0.0224697	610	tags=16%, list=4%, signal=15%	629/2152/718/5329/7035/5328/1604	CFB/F3/C3/PLAUR/TFPI/PLAU/CD55
KEGG_ECM_RECEPTOR_INTERACTION	KEGG_ECM_RECEPTOR_INTERACTION	75	0.644453	1.69418	0.00249257	0.0295785	0.0257129	449	tags=12%, list=3%, signal=12%	3696/22987/3914/3908/7057/6385/375790/960/3685	ITGB8/SV2C/LAMB3/LAMA2/THBS1/SDC4/AGRN/CD44/ITGAV
KEGG_PRION_DISEASES	KEGG_PRION_DISEASES	28	0.763161	1.73754	0.00380404	0.0423199	0.0367891	4	tags=7%, list=0%, signal=7%	3552/3553	IL1A/IL1B
KEGG_RIG_I_LIKE_RECEPTOR_SIGNALING_PATHWAY	KEGG_RIG_I_LIKE_RECEPTOR_SIGNALING_PATHWAY	52	0.672961	1.684	0.00479942	0.0502527	0.0436851	1379	tags=29%, list=9%, signal=26%	3576/9636/64135/4790/7124/23586/79132/3665/10010/7187/64343/7706/4792/8772/7186	CXCL8/ISG15/IFIH1/NFKB1/TNF/DDX58/DHX58/IRF7/TANK/TRAF3/AZI2/TRIM25/NFKBIA/FADD/TRAF2
KEGG_MAPK_SIGNALING_PATHWAY	KEGG_MAPK_SIGNALING_PATHWAY	212	0.496158	1.43847	0.0120804	0.119462	0.103849	1825	tags=22%, list=12%, signal=20%	3552/3553/80824/3554/356/1846/27330/4790/7124/4791/355/1326/1844/4914/773/51776/9175/836/7046/2768/1398/25780/23118/7042/5971/5906/4763/9693/4773/7040/6416/5908/10125/7186/6197/9448/11072/2002/5598/8649/5154/1848/2260/2317/1847/2254/5599	IL1A/IL1B/DUSP16/IL1R1/FASLG/DUSP4/RPS6KA6/NFKB1/TNF/NFKB2/FAS/MAP3K8/DUSP2/NTRK1/CACNA1A/MAP3K20/MAP3K13/CASP3/TGFBR1/GNA12/CRK/RASGRP3/TAB2/TGFB2/RELB/RAP1A/NF1/RAPGEF2/NFATC2/TGFB1/MAP2K4/RAP1B/RASGRP1/TRAF2/RPS6KA3/MAP4K4/DUSP14/ELK1/MAPK7/LAMTOR3/PDGFA/DUSP6/FGFR1/FLNB/DUSP5/FGF9/MAPK8
KEGG_ADIPOCYTOKINE_SIGNALING_PATHWAY	KEGG_ADIPOCYTOKINE_SIGNALING_PATHWAY	55	0.625899	1.57982	0.0154826	0.139428	0.121206	1825	tags=29%, list=12%, signal=26%	4790/7124/7133/6513/2182/79602/6774/5564/9021/4792/6517/2180/7186/5571/51422/5599	NFKB1/TNF/TNFRSF1B/SLC2A1/ACSL4/ADIPOR2/STAT3/PRKAB1/SOCS3/NFKBIA/SLC2A4/ACSL1/TRAF2/PRKAG1/PRKAG2/MAPK8
KEGG_NEUROACTIVE_LIGAND_RECEPTOR_INTERACTION	KEGG_NEUROACTIVE_LIGAND_RECEPTOR_INTERACTION	118	0.539404	1.48968	0.0156661	0.139428	0.121206	1664	tags=18%, list=11%, signal=16%	23566/5031/3269/10203/1511/1145/6752/151/136/2908/4157/2696/2358/4923/57053/719/3061/2151/7434/135/286530	LPAR3/P2RY6/HRH1/CALCRL/CTSG/CHRNE/SSTR2/ADRA2B/ADORA2B/NR3C1/MC1R/GIPR/FPR2/NTSR1/CHRNA10/C3AR1/HCRTR1/F2RL2/VIPR2/ADORA2A/P2RY8
KEGG_FOCAL_ADHESION	KEGG_FOCAL_ADHESION	180	0.496216	1.4227	0.020321	0.172245	0.149734	1825	tags=18%, list=12%, signal=16%	3696/3914/3908/2321/7057/595/6714/330/329/5291/7422/3685/1398/2889/103910/3688/3909/5906/5063/23533/5908/394/6696/2002/56034/5154/81/5500/5747/10298/2317/5295/5599	ITGB8/LAMB3/LAMA2/FLT1/THBS1/CCND1/SRC/BIRC3/BIRC2/PIK3CB/VEGFA/ITGAV/CRK/RAPGEF1/MYL12B/ITGB1/LAMA3/RAP1A/PAK3/PIK3R5/RAP1B/ARHGAP5/SPP1/ELK1/PDGFC/PDGFA/ACTN4/PPP1CB/PTK2/PAK4/FLNB/PIK3R1/MAPK8
KEGG_ASTHMA	KEGG_ASTHMA	23	0.725825	1.59947	0.0222301	0.179862	0.156355	294	tags=17%, list=2%, signal=17%	8288/6037/7124/3586	EPX/RNASE3/TNF/IL10
KEGG_SYSTEMIC_LUPUS_ERYTHEMATOSUS	KEGG_SYSTEMIC_LUPUS_ERYTHEMATOSUS	86	0.556118	1.48526	0.0245067	0.18966	0.164873	686	tags=9%, list=4%, signal=9%	718/1511/1991/941/7124/3586/6737/3458	C3/CTSG/ELANE/CD80/TNF/IL10/TRIM21/IFNG
KEGG_PHENYLALANINE_METABOLISM	KEGG_PHENYLALANINE_METABOLISM	13	0.795408	1.59706	0.0257563	0.191026	0.16606	992	tags=15%, list=6%, signal=14%	259307/2805	IL4I1/GOT1
KEGG_HISTIDINE_METABOLISM	KEGG_HISTIDINE_METABOLISM	22	-0.605547	-1.5904	0.0299037	0.208813	0.181523	2140	tags=36%, list=14%, signal=31%	3176/223/224/219/51409/91703/501/3034	HNMT/ALDH9A1/ALDH3A2/ALDH1B1/HEMK1/ACY3/ALDH7A1/HAL
KEGG_NATURAL_KILLER_CELL_MEDIATED_CYTOTOXICITY	KEGG_NATURAL_KILLER_CELL_MEDIATED_CYTOTOXICITY	109	0.525478	1.43957	0.0305008	0.208813	0.181523	1462	tags=20%, list=10%, signal=18%	356/3383/80329/7124/80328/5291/355/3812/8743/637/79465/3460/10725/3458/836/4772/4773/23533/3937/3105/4068/8795	FASLG/ICAM1/ULBP1/TNF/ULBP2/PIK3CB/FAS/KIR3DL2/TNFSF10/BID/ULBP3/IFNGR2/NFAT5/IFNG/CASP3/NFATC1/NFATC2/PIK3R5/LCP2/HLA-A/SH2D1A/TNFRSF10B
KEGG_RENAL_CELL_CARCINOMA	KEGG_RENAL_CELL_CARCINOMA	68	0.564478	1.46597	0.0389305	0.256653	0.22311	3151	tags=43%, list=21%, signal=34%	112399/9915/5291/7422/6513/54583/1398/2889/7042/5906/5063/7040/23533/5908/112398/10298/5295/9978/3845/673/5781/8453/4893/2034/5604/5155/6655/2885/4233	EGLN3/ARNT2/PIK3CB/VEGFA/SLC2A1/EGLN1/CRK/RAPGEF1/TGFB2/RAP1A/PAK3/TGFB1/PIK3R5/RAP1B/EGLN2/PAK4/PIK3R1/RBX1/KRAS/BRAF/PTPN11/CUL2/NRAS/EPAS1/MAP2K1/PDGFB/SOS2/GRB2/MET
KEGG_EPITHELIAL_CELL_SIGNALING_IN_HELICOBACTER_PYLORI_INFECTION	KEGG_EPITHELIAL_CELL_SIGNALING_IN_HELICOBACTER_PYLORI_INFECTION	62	0.570426	1.46373	0.0421581	0.262237	0.227965	2624	tags=39%, list=17%, signal=32%	3576/2919/4790/6714/245973/836/529/3577/50848/4792/6416/51606/9296/523/6868/5599/528/4067/1432/5781/5970/526/5600/245972	CXCL8/CXCL1/NFKB1/SRC/ATP6V1C2/CASP3/ATP6V1E1/CXCR1/F11R/NFKBIA/MAP2K4/ATP6V1H/ATP6V1F/ATP6V1A/ADAM17/MAPK8/ATP6V1C1/LYN/MAPK14/PTPN11/RELA/ATP6V1B2/MAPK11/ATP6V0D2
KEGG_PANCREATIC_CANCER	KEGG_PANCREATIC_CANCER	67	0.561956	1.45614	0.0427241	0.262237	0.227965	2398	tags=31%, list=16%, signal=27%	4790/595/5898/5291/7422/6772/5900/7046/6774/7042/1871/7040/23533/5295/5599/675/5337/3845/673/4088/5970	NFKB1/CCND1/RALA/PIK3CB/VEGFA/STAT1/RALGDS/TGFBR1/STAT3/TGFB2/E2F3/TGFB1/PIK3R5/PIK3R1/MAPK8/BRCA2/PLD1/KRAS/BRAF/SMAD3/RELA
KEGG_VASCULAR_SMOOTH_MUSCLE_CONTRACTION	KEGG_VASCULAR_SMOOTH_MUSCLE_CONTRACTION	83	-0.396513	-1.3587	0.0465935	0.276455	0.240324	1531	tags=27%, list=10%, signal=24%	112/5595/27345/94274/5578/5581/9138/5566/113/5331/2982/4638/2767/808/5582/4660/5499/27094/8681/5579/5330/4882	ADCY6/MAPK3/KCNMB4/PPP1R14A/PRKCA/PRKCE/NA/PRKACA/ADCY7/PLCB3/GUCY1A1/MYLK/GNA11/CALM3/PRKCG/PPP1R12B/PPP1CA/KCNMB3/JMJD7-PLA2G4B/PRKCB/PLCB2/NPR2
KEGG_ALLOGRAFT_REJECTION	KEGG_ALLOGRAFT_REJECTION	31	0.645581	1.49563	0.0491885	0.282437	0.245525	686	tags=19%, list=4%, signal=19%	356/941/7124/3586/355/3458	FASLG/CD80/TNF/IL10/FAS/IFNG
KEGG_PPAR_SIGNALING_PATHWAY	KEGG_PPAR_SIGNALING_PATHWAY	47	0.59295	1.46352	0.0511143	0.284323	0.247165	1362	tags=21%, list=9%, signal=19%	4973/51129/2710/2182/5467/11001/10580/2180/5468/8309	OLR1/ANGPTL4/GK/ACSL4/PPARD/SLC27A2/SORBS1/ACSL1/PPARG/ACOX2
KEGG_CELL_ADHESION_MOLECULES_CAMS	KEGG_CELL_ADHESION_MOLECULES_CAMS	110	0.500357	1.37207	0.0566559	0.305599	0.265659	1067	tags=11%, list=7%, signal=10%	3696/29126/3383/941/25945/6385/29851/3685/965/214/50848/3688	ITGB8/CD274/ICAM1/CD80/NECTIN3/SDC4/ICOS/ITGAV/CD58/ALCAM/F11R/ITGB1
KEGG_TYPE_II_DIABETES_MELLITUS	KEGG_TYPE_II_DIABETES_MELLITUS	40	0.595699	1.43551	0.0678064	0.350552	0.304738	1825	tags=30%, list=12%, signal=26%	8651/7124/5291/3099/773/9021/6517/23533/5315/3098/5295/5599	SOCS1/TNF/PIK3CB/HK2/CACNA1A/SOCS3/SLC2A4/PIK3R5/PKM/HK1/PIK3R1/MAPK8
KEGG_TYROSINE_METABOLISM	KEGG_TYROSINE_METABOLISM	27	0.643731	1.45679	0.0689288	0.350552	0.304738	992	tags=7%, list=6%, signal=7%	259307/2805	IL4I1/GOT1
KEGG_SPHINGOLIPID_METABOLISM	KEGG_SPHINGOLIPID_METABOLISM	34	0.610523	1.4345	0.0738828	0.365309	0.317566	2080	tags=32%, list=14%, signal=28%	130367/8877/8560/64781/2531/2581/81537/10558/55512/8879/259230	SGPP2/SPHK1/DEGS1/CERK/KDSR/GALC/SGPP1/SPTLC1/SMPD3/SGPL1/SGMS1
KEGG_BLADDER_CANCER	KEGG_BLADDER_CANCER	39	0.591762	1.42011	0.0760595	0.365908	0.318087	395	tags=10%, list=3%, signal=10%	3576/7057/595/7422	CXCL8/THBS1/CCND1/VEGFA
KEGG_LIMONENE_AND_PINENE_DEGRADATION	KEGG_LIMONENE_AND_PINENE_DEGRADATION	10	-0.673427	-1.47245	0.0785868	0.368117	0.320007	3899	tags=60%, list=25%, signal=45%	1892/1962/223/224/219/501	ECHS1/EHHADH/ALDH9A1/ALDH3A2/ALDH1B1/ALDH7A1
KEGG_T_CELL_RECEPTOR_SIGNALING_PATHWAY	KEGG_T_CELL_RECEPTOR_SIGNALING_PATHWAY	100	0.492882	1.33935	0.0812874	0.371004	0.322517	2601	tags=28%, list=17%, signal=23%	4790/7124/3586/5291/29851/1326/10892/10725/3458/4792/5063/4772/4773/23533/3937/10125/3702/5133/10298/925/5295/5534/2534/3845/1432/5970/4893/5600	NFKB1/TNF/IL10/PIK3CB/ICOS/MAP3K8/MALT1/NFAT5/IFNG/NFKBIA/PAK3/NFATC1/NFATC2/PIK3R5/LCP2/RASGRP1/ITK/PDCD1/PAK4/CD8A/PIK3R1/PPP3R1/FYN/KRAS/MAPK14/RELA/NRAS/MAPK11
KEGG_AMYOTROPHIC_LATERAL_SCLEROSIS_ALS	KEGG_AMYOTROPHIC_LATERAL_SCLEROSIS_ALS	45	0.569461	1.39708	0.0842075	0.374723	0.32575	2859	tags=33%, list=19%, signal=27%	6506/7124/7133/637/836/5868/4741/5534/847/1432/5600/5630/7132/5533/5606	SLC1A2/TNF/TNFRSF1B/BID/CASP3/RAB5A/NEFM/PPP3R1/CAT/MAPK14/MAPK11/PRPH/TNFRSF1A/PPP3CC/MAP2K3
KEGG_RENIN_ANGIOTENSIN_SYSTEM	KEGG_RENIN_ANGIOTENSIN_SYSTEM	11	0.734493	1.437	0.101472	0.41316	0.359163	1360	tags=27%, list=9%, signal=25%	1511/1636/290	CTSG/ACE/ANPEP
KEGG_PROTEIN_EXPORT	KEGG_PROTEIN_EXPORT	23	0.637697	1.40527	0.102662	0.41316	0.359163	3468	tags=52%, list=23%, signal=40%	6729/90701/10952/23480/7095/6734/9789/29927/6727/6730/6731/3309	SRP54/SEC11C/SEC61B/SEC61G/SEC62/SRPRA/SPCS2/SEC61A1/SRP14/SRP68/SRP72/HSPA5
KEGG_VIRAL_MYOCARDITIS	KEGG_VIRAL_MYOCARDITIS	57	0.531428	1.3471	0.102751	0.41316	0.359163	1302	tags=18%, list=9%, signal=16%	3908/3383/941/595/637/1604/27/836/25/3105	LAMA2/ICAM1/CD80/CCND1/BID/CD55/ABL2/CASP3/ABL1/HLA-A
KEGG_O_GLYCAN_BIOSYNTHESIS	KEGG_O_GLYCAN_BIOSYNTHESIS	19	0.661102	1.41173	0.103296	0.41316	0.359163	2585	tags=53%, list=17%, signal=44%	9334/55808/6483/6482/2589/2591/63917/11226/79695/51301	B4GALT5/ST6GALNAC1/ST3GAL2/ST3GAL1/GALNT1/GALNT3/GALNT11/GALNT6/GALNT12/GCNT4
KEGG_GAP_JUNCTION	KEGG_GAP_JUNCTION	71	-0.37724	-1.25787	0.108304	0.41316	0.359163	1531	tags=20%, list=10%, signal=18%	112/5595/5578/5566/113/5331/2982/2767/3265/5582/2770/5607/5579/5330	ADCY6/MAPK3/PRKCA/PRKACA/ADCY7/PLCB3/GUCY1A1/GNA11/HRAS/PRKCG/GNAI1/MAP2K5/PRKCB/PLCB2
KEGG_GLYCEROPHOSPHOLIPID_METABOLISM	KEGG_GLYCEROPHOSPHOLIPID_METABOLISM	64	-0.386096	-1.26614	0.108995	0.41316	0.359163	2526	tags=33%, list=16%, signal=28%	1606/100137049/6901/150763/81490/10554/81579/54675/11313/160851/23659/8525/154141/1608/5833/5338/23171/1120/254531/2819/8681	DGKA/PLA2G4B/TAZ/GPAT2/PTDSS2/AGPAT1/PLA2G12A/CRLS1/LYPLA2/DGKH/PLA2G15/DGKZ/MBOAT1/DGKG/PCYT2/PLD2/GPD1L/CHKB/LPCAT4/GPD1/JMJD7-PLA2G4B
KEGG_ACUTE_MYELOID_LEUKEMIA	KEGG_ACUTE_MYELOID_LEUKEMIA	57	0.526905	1.33564	0.110415	0.41316	0.359163	3160	tags=40%, list=21%, signal=32%	4790/595/5291/5371/5467/6774/8900/23533/6776/5295/861/11040/3815/3845/673/5970/4893/5292/5604/6655/2885/8517/6934	NFKB1/CCND1/PIK3CB/PML/PPARD/STAT3/CCNA1/PIK3R5/STAT5A/PIK3R1/NA/PIM2/KIT/KRAS/BRAF/RELA/NRAS/PIM1/MAP2K1/SOS2/GRB2/IKBKG/TCF7L2
KEGG_AUTOIMMUNE_THYROID_DISEASE	KEGG_AUTOIMMUNE_THYROID_DISEASE	31	0.5929	1.37359	0.111414	0.41316	0.359163	356	tags=13%, list=2%, signal=13%	356/941/3586/355	FASLG/CD80/IL10/FAS
KEGG_CYSTEINE_AND_METHIONINE_METABOLISM	KEGG_CYSTEINE_AND_METHIONINE_METABOLISM	25	0.610452	1.36416	0.125307	0.452126	0.393037	992	tags=16%, list=6%, signal=15%	259307/3939/1491/2805	IL4I1/LDHA/CTH/GOT1
KEGG_HEDGEHOG_SIGNALING_PATHWAY	KEGG_HEDGEHOG_SIGNALING_PATHWAY	40	0.554233	1.33559	0.127002	0.452126	0.393037	2220	tags=25%, list=14%, signal=21%	7471/654/80326/650/1455/7474/1452/23291/7483/353500	WNT1/BMP6/WNT10A/BMP2/CSNK1G2/WNT5A/CSNK1A1/FBXW11/WNT9A/BMP8A
KEGG_TGF_BETA_SIGNALING_PATHWAY	KEGG_TGF_BETA_SIGNALING_PATHWAY	71	0.495875	1.29501	0.130606	0.455841	0.396266	1358	tags=20%, list=9%, signal=18%	654/7057/7124/4093/3458/7046/650/7042/659/3625/7040/92/9765/5516	BMP6/THBS1/TNF/SMAD9/IFNG/TGFBR1/BMP2/TGFB2/BMPR2/INHBB/TGFB1/ACVR2A/ZFYVE16/PPP2CB
KEGG_LYSINE_DEGRADATION	KEGG_LYSINE_DEGRADATION	43	-0.417575	-1.26694	0.135979	0.460977	0.400731	2408	tags=26%, list=16%, signal=22%	55217/223/80854/3033/224/219/5351/10157/10919/501/51166	TMLHE/ALDH9A1/SETD7/HADH/ALDH3A2/ALDH1B1/PLOD1/AASS/EHMT2/ALDH7A1/AADAT
KEGG_INTESTINAL_IMMUNE_NETWORK_FOR_IGA_PRODUCTION	KEGG_INTESTINAL_IMMUNE_NETWORK_FOR_IGA_PRODUCTION	38	0.55417	1.32391	0.137257	0.460977	0.400731	412	tags=11%, list=3%, signal=10%	941/3601/3586/29851	CD80/IL15RA/IL10/ICOS
KEGG_P53_SIGNALING_PATHWAY	KEGG_P53_SIGNALING_PATHWAY	63	0.492419	1.26627	0.159621	0.50793	0.441548	2988	tags=32%, list=20%, signal=26%	7057/595/3732/355/64065/637/836/83667/575/8795/50484/9538/900/64326/894/143686/1026/4616/5366/1643	THBS1/CCND1/CD82/FAS/PERP/BID/CASP3/SESN2/ADGRB1/TNFRSF10B/RRM2B/EI24/CCNG1/COP1/CCND2/SESN3/CDKN1A/GADD45B/PMAIP1/DDB2
KEGG_PROXIMAL_TUBULE_BICARBONATE_RECLAMATION	KEGG_PROXIMAL_TUBULE_BICARBONATE_RECLAMATION	17	0.636175	1.33436	0.160487	0.50793	0.441548	1864	tags=29%, list=12%, signal=26%	486/6550/760/476/483	FXYD2/SLC9A3/CA2/ATP1A1/ATP1B3
KEGG_GLYCOLYSIS_GLUCONEOGENESIS	KEGG_GLYCOLYSIS_GLUCONEOGENESIS	42	0.529421	1.28478	0.162504	0.50793	0.441548	1669	tags=31%, list=11%, signal=28%	3099/3939/5230/1738/5223/669/2821/5214/2597/2023/7167/5315/3098	HK2/LDHA/PGK1/DLD/PGAM1/BPGM/GPI/PFKP/GAPDH/ENO1/TPI1/PKM/HK1
KEGG_LYSOSOME	KEGG_LYSOSOME	117	0.444331	1.22588	0.163993	0.50793	0.441548	2791	tags=26%, list=18%, signal=21%	27074/1511/1514/4864/5641/4891/2581/1509/79158/3920/1176/1213/8546/138050/23431/51606/55353/967/9374/950/23457/26503/130340/1508/245972/3916/54/9741/7805/23545	LAMP3/CTSG/CTSL/NPC1/LGMN/SLC11A2/GALC/CTSD/GNPTAB/LAMP2/AP3S1/CLTC/AP3B1/HGSNAT/AP4E1/ATP6V1H/LAPTM4B/CD63/PPT2/SCARB2/ABCB9/SLC17A5/AP1S3/CTSB/ATP6V0D2/LAMP1/ACP5/LAPTM4A/LAPTM5/ATP6V0A2
KEGG_CHRONIC_MYELOID_LEUKEMIA	KEGG_CHRONIC_MYELOID_LEUKEMIA	69	0.482819	1.2561	0.165505	0.50793	0.441548	3149	tags=42%, list=21%, signal=34%	4790/595/5291/7046/1398/7042/4792/25/1871/7040/23533/6776/5295/861/2122/3845/673/4088/5781/5970/4893/4089/1026/9846/5604/6655/6464/2885/8517	NFKB1/CCND1/PIK3CB/TGFBR1/CRK/TGFB2/NFKBIA/ABL1/E2F3/TGFB1/PIK3R5/STAT5A/PIK3R1/NA/MECOM/KRAS/BRAF/SMAD3/PTPN11/RELA/NRAS/SMAD4/CDKN1A/GAB2/MAP2K1/SOS2/SHC1/GRB2/IKBKG
KEGG_PENTOSE_PHOSPHATE_PATHWAY	KEGG_PENTOSE_PHOSPHATE_PATHWAY	23	0.58754	1.29474	0.180814	0.541404	0.470647	1176	tags=17%, list=8%, signal=16%	64080/8277/2821/5214	RBKS/TKTL1/GPI/PFKP
KEGG_ENDOCYTOSIS	KEGG_ENDOCYTOSIS	167	0.417069	1.18872	0.182745	0.541404	0.470647	2135	tags=25%, list=14%, signal=22%	3559/2321/5979/10938/6714/84552/4914/51510/2869/7037/9829/7251/26286/3577/50807/30844/5868/116984/79720/3949/128866/4734/23327/3560/1213/8394/57132/5584/3105/57403/6455/89853/137492/83737/8027/51652/11031/25978/163/3815/5337/10254	IL2RA/FLT1/RET/EHD1/SRC/PARD6G/NTRK1/CHMP5/GRK5/TFRC/DNAJC6/TSG101/ARFGAP3/CXCR1/ASAP1/EHD4/RAB5A/ARAP2/VPS37B/LDLR/CHMP4B/NEDD4/NEDD4L/IL2RB/CLTC/PIP5K1A/CHMP1B/PRKCI/HLA-A/RAB22A/SH3GL1/MVB12B/VPS37A/ITCH/STAM/CHMP3/RAB31/CHMP2B/AP2B1/KIT/PLD1/STAM2
KEGG_VEGF_SIGNALING_PATHWAY	KEGG_VEGF_SIGNALING_PATHWAY	63	0.481308	1.2377	0.185537	0.541404	0.470647	1274	tags=16%, list=8%, signal=15%	5743/6714/5291/8877/9047/7422/10725/4772/4773/23533	PTGS2/SRC/PIK3CB/SPHK1/SH2D2A/VEGFA/NFAT5/NFATC1/NFATC2/PIK3R5
KEGG_DRUG_METABOLISM_OTHER_ENZYMES	KEGG_DRUG_METABOLISM_OTHER_ENZYMES	22	0.583411	1.27701	0.196843	0.547728	0.476145	192	tags=9%, list=1%, signal=9%	1577/51733	CYP3A5/UPB1
KEGG_GLYCOSPHINGOLIPID_BIOSYNTHESIS_GLOBO_SERIES	KEGG_GLYCOSPHINGOLIPID_BIOSYNTHESIS_GLOBO_SERIES	11	0.667619	1.30616	0.19969	0.547728	0.476145	707	tags=27%, list=5%, signal=26%	6489/6483/6482	ST8SIA1/ST3GAL2/ST3GAL1
KEGG_NICOTINATE_AND_NICOTINAMIDE_METABOLISM	KEGG_NICOTINATE_AND_NICOTINAMIDE_METABOLISM	22	0.581008	1.27175	0.2012	0.547728	0.476145	704	tags=14%, list=5%, signal=13%	10135/51251/4860	NAMPT/NT5C3A/PNP
KEGG_BASAL_CELL_CARCINOMA	KEGG_BASAL_CELL_CARCINOMA	43	0.507136	1.23503	0.203958	0.547728	0.476145	1313	tags=16%, list=9%, signal=15%	7471/80326/8323/650/7855/324/7474	WNT1/WNT10A/FZD6/BMP2/FZD5/APC/WNT5A
KEGG_THYROID_CANCER	KEGG_THYROID_CANCER	28	0.550343	1.253	0.206731	0.547728	0.476145	3464	tags=46%, list=23%, signal=36%	5979/595/4914/5468/8031/3845/673/7849/4893/5604/6934/10342/5605	RET/CCND1/NTRK1/PPARG/NCOA4/KRAS/BRAF/PAX8/NRAS/MAP2K1/TCF7L2/TFG/MAP2K2
KEGG_BASE_EXCISION_REPAIR	KEGG_BASE_EXCISION_REPAIR	33	-0.417655	-1.20004	0.209028	0.547728	0.476145	2927	tags=33%, list=19%, signal=27%	57804/4595/7374/5424/10039/252969/7515/56655/142/4913/4968	POLD4/MUTYH/UNG/POLD1/PARP3/NEIL2/XRCC1/POLE4/PARP1/NTHL1/OGG1
KEGG_ALANINE_ASPARTATE_AND_GLUTAMATE_METABOLISM	KEGG_ALANINE_ASPARTATE_AND_GLUTAMATE_METABOLISM	25	0.560862	1.25335	0.211294	0.547728	0.476145	22	tags=4%, list=0%, signal=4%	259307	IL4I1
KEGG_BUTANOATE_METABOLISM	KEGG_BUTANOATE_METABOLISM	26	-0.444271	-1.212	0.212322	0.547728	0.476145	3194	tags=46%, list=21%, signal=37%	1962/5160/5019/223/65985/3033/224/7915/18/219/501/622	EHHADH/PDHA1/OXCT1/ALDH9A1/AACS/HADH/ALDH3A2/ALDH5A1/ABAT/ALDH1B1/ALDH7A1/BDH1
KEGG_NON_HOMOLOGOUS_END_JOINING	KEGG_NON_HOMOLOGOUS_END_JOINING	13	-0.535152	-1.24603	0.218971	0.556812	0.484041	973	tags=23%, list=6%, signal=22%	27434/64421/79840	POLM/DCLRE1C/NHEJ1
KEGG_NEUROTROPHIN_SIGNALING_PATHWAY	KEGG_NEUROTROPHIN_SIGNALING_PATHWAY	116	0.425454	1.17293	0.225313	0.562204	0.488729	3195	tags=33%, list=21%, signal=26%	3656/356/27330/4790/5291/4914/1398/2889/4792/5906/7532/25/23533/5908/5663/3654/6197/5598/816/5295/5599/3845/673/1432/5781/5970/4893/5600/5604/11108/7533/6655/6464/57498/2885/7534/8767/27018	IRAK2/FASLG/RPS6KA6/NFKB1/PIK3CB/NTRK1/CRK/RAPGEF1/NFKBIA/RAP1A/YWHAG/ABL1/PIK3R5/RAP1B/PSEN1/IRAK1/RPS6KA3/MAPK7/CAMK2B/PIK3R1/MAPK8/KRAS/BRAF/MAPK14/PTPN11/RELA/NRAS/MAPK11/MAP2K1/PRDM4/YWHAH/SOS2/SHC1/KIDINS220/GRB2/YWHAZ/RIPK2/BEX3
KEGG_PHOSPHATIDYLINOSITOL_SIGNALING_SYSTEM	KEGG_PHOSPHATIDYLINOSITOL_SIGNALING_SYSTEM	70	-0.341353	-1.13525	0.227408	0.562204	0.488729	1307	tags=23%, list=9%, signal=21%	3613/5336/5297/5287/5578/160851/3636/8525/1608/5331/808/5582/8396/8503/5579/5330	IMPA2/PLCG2/PI4KA/PIK3C2B/PRKCA/DGKH/INPPL1/DGKZ/DGKG/PLCB3/CALM3/PRKCG/PIP4K2B/PIK3R3/PRKCB/PLCB2
KEGG_ADHERENS_JUNCTION	KEGG_ADHERENS_JUNCTION	69	0.45519	1.18422	0.235477	0.564167	0.490435	2706	tags=30%, list=18%, signal=25%	6615/25945/6714/1500/7525/7046/5770/10580/117178/5795/81/2260/5787/10458/2534/4088/1495/5818/5819/4089/52	SNAI1/NECTIN3/SRC/CTNND1/YES1/TGFBR1/PTPN1/SORBS1/SSX2IP/PTPRJ/ACTN4/FGFR1/PTPRB/BAIAP2/FYN/SMAD3/CTNNA1/NECTIN1/NECTIN2/SMAD4/ACP1
KEGG_NITROGEN_METABOLISM	KEGG_NITROGEN_METABOLISM	18	0.586143	1.24105	0.235618	0.564167	0.490435	867	tags=17%, list=6%, signal=16%	771/1491/760	CA12/CTH/CA2
KEGG_HYPERTROPHIC_CARDIOMYOPATHY_HCM	KEGG_HYPERTROPHIC_CARDIOMYOPATHY_HCM	59	0.465569	1.18619	0.237711	0.564167	0.490435	1692	tags=22%, list=11%, signal=20%	3696/3908/7124/3685/1636/5564/7042/3688/7040/5571/2010/51422/4607	ITGB8/LAMA2/TNF/ITGAV/ACE/PRKAB1/TGFB2/ITGB1/TGFB1/PRKAG1/EMD/PRKAG2/MYBPC3
KEGG_GLYCOSAMINOGLYCAN_BIOSYNTHESIS_CHONDROITIN_SULFATE	KEGG_GLYCOSAMINOGLYCAN_BIOSYNTHESIS_CHONDROITIN_SULFATE	21	0.561273	1.21957	0.251178	0.587497	0.510716	630	tags=19%, list=4%, signal=18%	29940/56548/50515/22856	DSE/CHST7/CHST11/CHSY1
KEGG_INSULIN_SIGNALING_PATHWAY	KEGG_INSULIN_SIGNALING_PATHWAY	118	0.415258	1.14682	0.257416	0.587497	0.510716	3099	tags=31%, list=20%, signal=25%	79660/8651/5291/3099/9322/10211/57521/1398/5770/5564/10580/2889/9021/6517/2997/5584/23533/5571/2002/51422/3098/5500/5295/5599/3845/2194/673/1977/4893/6720/5604/31/23433/6009/6655/6464/2885	PPP1R3B/SOCS1/PIK3CB/HK2/TRIP10/FLOT1/RPTOR/CRK/PTPN1/PRKAB1/SORBS1/RAPGEF1/SOCS3/SLC2A4/GYS1/PRKCI/PIK3R5/PRKAG1/ELK1/PRKAG2/HK1/PPP1CB/PIK3R1/MAPK8/KRAS/FASN/BRAF/EIF4E/NRAS/SREBF1/MAP2K1/ACACA/RHOQ/RHEB/SOS2/SHC1/GRB2
KEGG_LONG_TERM_POTENTIATION	KEGG_LONG_TERM_POTENTIATION	58	-0.348371	-1.12254	0.257443	0.587497	0.510716	1525	tags=21%, list=10%, signal=19%	5595/5578/10411/5566/5331/808/3265/5582/5499/817/5579/5330	MAPK3/PRKCA/RAPGEF3/PRKACA/PLCB3/CALM3/HRAS/PRKCG/PPP1CA/CAMK2D/PRKCB/PLCB2
KEGG_COLORECTAL_CANCER	KEGG_COLORECTAL_CANCER	61	0.45481	1.16412	0.260988	0.588049	0.511196	2247	tags=23%, list=15%, signal=20%	595/5291/5900/836/7046/7042/7040/324/23533/5295/5599/3845/673/4088	CCND1/PIK3CB/RALGDS/CASP3/TGFBR1/TGFB2/TGFB1/APC/PIK3R5/PIK3R1/MAPK8/KRAS/BRAF/SMAD3
KEGG_PROTEASOME	KEGG_PROTEASOME	42	0.480261	1.16548	0.27531	0.607722	0.528298	5235	tags=64%, list=34%, signal=42%	3458/51371/9491/5695/5704/5713/5689/5684/5718/10213/5690/5687/5700/5682/23198/5709/5702/5701/10197/9861/5708/5707/5717/5693/5691/5714/5719	IFNG/POMP/PSMF1/PSMB7/PSMC4/PSMD7/PSMB1/PSMA3/PSMD12/PSMD14/PSMB2/PSMA6/PSMC1/PSMA1/PSME4/PSMD3/PSMC3/PSMC2/PSME3/PSMD6/PSMD2/PSMD1/PSMD11/PSMB5/PSMB3/PSMD8/PSMD13
KEGG_GNRH_SIGNALING_PATHWAY	KEGG_GNRH_SIGNALING_PATHWAY	78	-0.322587	-1.09332	0.278909	0.607722	0.528298	1531	tags=21%, list=10%, signal=19%	112/5595/5578/4214/5566/113/6300/5331/2767/5338/808/3265/8681/817/5579/5330	ADCY6/MAPK3/PRKCA/MAP3K1/PRKACA/ADCY7/MAPK12/PLCB3/GNA11/PLD2/CALM3/HRAS/JMJD7-PLA2G4B/CAMK2D/PRKCB/PLCB2
KEGG_PANTOTHENATE_AND_COA_BIOSYNTHESIS	KEGG_PANTOTHENATE_AND_COA_BIOSYNTHESIS	15	0.584183	1.20229	0.279962	0.607722	0.528298	565	tags=13%, list=4%, signal=13%	51733/60490	UPB1/PPCDC
KEGG_PORPHYRIN_AND_CHLOROPHYLL_METABOLISM	KEGG_PORPHYRIN_AND_CHLOROPHYLL_METABOLISM	21	0.543935	1.18189	0.285739	0.609712	0.530028	2922	tags=38%, list=19%, signal=31%	2495/211/2235/3052/1371/3145/644/645	FTH1/ALAS1/FECH/HCCS/CPOX/HMBS/BLVRA/BLVRB
KEGG_ERBB_SIGNALING_PATHWAY	KEGG_ERBB_SIGNALING_PATHWAY	78	0.428587	1.13205	0.290522	0.609712	0.530028	3099	tags=35%, list=20%, signal=28%	2069/6714/5291/27/1398/25/5063/6416/23533/6776/2002/816/5747/10298/5295/5599/3845/673/145957/4893/1026/2065/5604/374/6655/6464/2885	EREG/SRC/PIK3CB/ABL2/CRK/ABL1/PAK3/MAP2K4/PIK3R5/STAT5A/ELK1/CAMK2B/PTK2/PAK4/PIK3R1/MAPK8/KRAS/BRAF/NRG4/NRAS/CDKN1A/ERBB3/MAP2K1/AREG/SOS2/SHC1/GRB2
KEGG_GLYCOSAMINOGLYCAN_BIOSYNTHESIS_KERATAN_SULFATE	KEGG_GLYCOSAMINOGLYCAN_BIOSYNTHESIS_KERATAN_SULFATE	14	0.586465	1.19243	0.291155	0.609712	0.530028	1070	tags=29%, list=7%, signal=27%	9435/6483/6482/10678	CHST2/ST3GAL2/ST3GAL1/B3GNT2
KEGG_STEROID_BIOSYNTHESIS	KEGG_STEROID_BIOSYNTHESIS	16	0.557479	1.1585	0.319746	0.637239	0.553957	3628	tags=56%, list=24%, signal=43%	1717/6309/50814/6713/4047/6307/2222/1718/1594	DHCR7/SC5D/NSDHL/SQLE/LSS/MSMO1/FDFT1/DHCR24/CYP27B1
KEGG_GLYCOSAMINOGLYCAN_DEGRADATION	KEGG_GLYCOSAMINOGLYCAN_DEGRADATION	17	0.550027	1.15366	0.321927	0.637239	0.553957	1262	tags=18%, list=8%, signal=16%	9953/8372/138050	HS3ST3B1/HYAL3/HGSNAT
KEGG_GALACTOSE_METABOLISM	KEGG_GALACTOSE_METABOLISM	21	-0.427795	-1.11191	0.322873	0.637239	0.553957	697	tags=24%, list=5%, signal=23%	2592/2595/231/2548/2584	GALT/GANC/AKR1B1/GAA/GALK1
KEGG_METABOLISM_OF_XENOBIOTICS_BY_CYTOCHROME_P450	KEGG_METABOLISM_OF_XENOBIOTICS_BY_CYTOCHROME_P450	26	0.505459	1.13725	0.323161	0.637239	0.553957	1165	tags=12%, list=8%, signal=11%	1577/9446/119391	CYP3A5/GSTO1/GSTO2
KEGG_LONG_TERM_DEPRESSION	KEGG_LONG_TERM_DEPRESSION	48	-0.349298	-1.08065	0.324714	0.637239	0.553957	1525	tags=29%, list=10%, signal=26%	5595/2781/5578/5331/2982/3480/2767/3265/5582/6261/2770/8681/5579/5330	MAPK3/GNAZ/PRKCA/PLCB3/GUCY1A1/IGF1R/GNA11/HRAS/PRKCG/RYR1/GNAI1/JMJD7-PLA2G4B/PRKCB/PLCB2
KEGG_MTOR_SIGNALING_PATHWAY	KEGG_MTOR_SIGNALING_PATHWAY	47	0.450742	1.11253	0.329423	0.637239	0.553957	2187	tags=21%, list=14%, signal=18%	27330/5291/7422/54541/57521/23533/6197/5295/51719/673	RPS6KA6/PIK3CB/VEGFA/DDIT4/RPTOR/PIK3R5/RPS6KA3/PIK3R1/CAB39/BRAF
KEGG_CARDIAC_MUSCLE_CONTRACTION	KEGG_CARDIAC_MUSCLE_CONTRACTION	55	-0.336362	-1.07155	0.330183	0.637239	0.553957	1614	tags=11%, list=11%, signal=10%	7384/782/7169/784/785/55799	UQCRC1/CACNB1/TPM2/CACNB3/CACNB4/CACNA2D3
KEGG_ARRHYTHMOGENIC_RIGHT_VENTRICULAR_CARDIOMYOPATHY_ARVC	KEGG_ARRHYTHMOGENIC_RIGHT_VENTRICULAR_CARDIOMYOPATHY_ARVC	59	0.433416	1.10427	0.332939	0.637239	0.553957	449	tags=5%, list=3%, signal=5%	3696/3908/3685	ITGB8/LAMA2/ITGAV
KEGG_ALZHEIMERS_DISEASE	KEGG_ALZHEIMERS_DISEASE	150	0.382633	1.08077	0.342739	0.649017	0.564196	1321	tags=8%, list=9%, signal=7%	3553/7124/355/637/840/836/2081/9167/2597/22926/5663/8772	IL1B/TNF/FAS/BID/CASP7/CASP3/ERN1/COX7A2L/GAPDH/ATF6/PSEN1/FADD
KEGG_RIBOSOME	KEGG_RIBOSOME	85	0.404978	1.08021	0.358025	0.670826	0.583154	6243	tags=71%, list=41%, signal=42%	6166/6136/28998/6222/25873/6224/51065/6133/6159/6124/9349/6175/9045/7311/6135/6187/6210/6201/6229/6129/6122/6206/6165/6128/6147/6155/51121/6144/6161/6235/6157/11224/6134/6152/51187/6173/6168/6125/6156/6193/6143/6164/6167/6160/6169/6189/6154/6233/6230/6203/6138/6176/6227/6223/6209/6130/6232/6194/3921/4736	RPL36AL/RPL12/MRPL13/RPS18/RPL36/RPS20/RPS27L/RPL9/RPL29/RPL4/RPL23/RPLP0/RPL14/UBA52/RPL11/RPS2/RPS15A/RPS7/RPS24/RPL7/RPL3/RPS12/RPL35A/RPL6/RPL23A/RPL27/RPL26L1/RPL21/RPL32/RPS29/RPL27A/RPL35/RPL10/RPL24/RSL24D1/RPL36A/RPL37A/RPL5/RPL30/RPS5/RPL19/RPL34/RPL37/RPL31/RPL38/RPS3A/RPL26/RPS27A/RPS25/RPS9/RPL15/RPLP1/RPS21/RPS19/RPS15/RPL7A/RPS27/RPS6/RPSA/RPL10A
KEGG_GLYCOSPHINGOLIPID_BIOSYNTHESIS_LACTO_AND_NEOLACTO_SERIES	KEGG_GLYCOSPHINGOLIPID_BIOSYNTHESIS_LACTO_AND_NEOLACTO_SERIES	20	0.514454	1.10868	0.362279	0.671725	0.583936	1070	tags=20%, list=7%, signal=19%	6489/84002/6484/10678	ST8SIA1/B3GNT5/ST3GAL4/B3GNT2
KEGG_PYRUVATE_METABOLISM	KEGG_PYRUVATE_METABOLISM	35	-0.361563	-1.05102	0.378086	0.68706	0.597267	2941	tags=40%, list=19%, signal=32%	5160/197257/10873/223/4200/224/97/84264/55902/219/9380/32/501/231	PDHA1/LDHD/ME3/ALDH9A1/ME2/ALDH3A2/ACYP1/HAGHL/ACSS2/ALDH1B1/GRHPR/ACACB/ALDH7A1/AKR1B1
KEGG_RNA_DEGRADATION	KEGG_RNA_DEGRADATION	56	0.423358	1.07084	0.378269	0.68706	0.597267	3977	tags=46%, list=26%, signal=34%	87178/5393/246175/57472/54464/2023/11044/27257/219988/4850/1656/23517/64895/9125/2026/55802/10438/11157/9652/3313/51691/27258/51013/22894/54512/51010	PNPT1/EXOSC9/CNOT6L/CNOT6/XRN1/ENO1/TENT4A/LSM1/PATL1/CNOT4/DDX6/MTREX/PAPOLG/CNOT9/ENO2/DCP1A/C1D/LSM6/TTC37/HSPA9/LSM8/LSM3/EXOSC1/DIS3/EXOSC4/EXOSC3
KEGG_STEROID_HORMONE_BIOSYNTHESIS	KEGG_STEROID_HORMONE_BIOSYNTHESIS	15	0.531497	1.09386	0.38717	0.696125	0.605147	138	tags=7%, list=1%, signal=7%	1577	CYP3A5
KEGG_CALCIUM_SIGNALING_PATHWAY	KEGG_CALCIUM_SIGNALING_PATHWAY	124	0.378311	1.0503	0.395115	0.699463	0.608049	577	tags=6%, list=4%, signal=6%	3269/491/6547/8877/136/490/2769/773	HRH1/ATP2B2/SLC8A3/SPHK1/ADORA2B/ATP2B1/GNA15/CACNA1A
KEGG_DORSO_VENTRAL_AXIS_FORMATION	KEGG_DORSO_VENTRAL_AXIS_FORMATION	19	0.50419	1.07666	0.396887	0.699463	0.608049	4007	tags=58%, list=26%, signal=43%	4851/2120/2114/4853/3845/5604/6655/2885/51513/143689/5594	NOTCH1/ETV6/ETS2/NOTCH2/KRAS/MAP2K1/SOS2/GRB2/ETV7/PIWIL4/MAPK1
KEGG_PROSTATE_CANCER	KEGG_PROSTATE_CANCER	82	0.394816	1.04874	0.402005	0.701537	0.609852	3178	tags=30%, list=21%, signal=24%	4790/595/5291/4792/7184/1871/23533/56034/5154/2260/5295/3845/673/10488/5970/4893/1026/5604/3645/5155/6655/2885/8517/6934/64764	NFKB1/CCND1/PIK3CB/NFKBIA/HSP90B1/E2F3/PIK3R5/PDGFC/PDGFA/FGFR1/PIK3R1/KRAS/BRAF/CREB3/RELA/NRAS/CDKN1A/MAP2K1/INSRR/PDGFB/SOS2/GRB2/IKBKG/TCF7L2/CREB3L2
KEGG_ARGININE_AND_PROLINE_METABOLISM	KEGG_ARGININE_AND_PROLINE_METABOLISM	41	0.434523	1.05093	0.408752	0.706387	0.614068	2463	tags=24%, list=16%, signal=21%	384/6303/5033/2805/4942/51056/113451/162417/6611/445	ARG2/SAT1/P4HA1/GOT1/OAT/LAP3/AZIN2/NAGS/SMS/ASS1
KEGG_RETINOL_METABOLISM	KEGG_RETINOL_METABOLISM	19	0.495038	1.05712	0.417669	0.711163	0.61822	273	tags=11%, list=2%, signal=10%	1577/8854	CYP3A5/ALDH1A2
KEGG_DILATED_CARDIOMYOPATHY	KEGG_DILATED_CARDIOMYOPATHY	64	0.402782	1.03761	0.419506	0.711163	0.61822	1206	tags=11%, list=8%, signal=10%	3696/3908/7124/3685/7042/3688/7040	ITGB8/LAMA2/TNF/ITGAV/TGFB2/ITGB1/TGFB1
KEGG_ARACHIDONIC_ACID_METABOLISM	KEGG_ARACHIDONIC_ACID_METABOLISM	32	0.445654	1.03706	0.428588	0.719705	0.625645	15	tags=3%, list=0%, signal=3%	5743	PTGS2
KEGG_PROPANOATE_METABOLISM	KEGG_PROPANOATE_METABOLISM	30	-0.358782	-1.00972	0.439799	0.731627	0.63601	3946	tags=57%, list=26%, signal=42%	84693/1892/84532/8803/1962/8802/5095/26275/223/224/4329/8801/55902/18/219/32/501	MCEE/ECHS1/ACSS1/SUCLA2/EHHADH/SUCLG1/PCCA/HIBCH/ALDH9A1/ALDH3A2/ALDH6A1/SUCLG2/ACSS2/ABAT/ALDH1B1/ACACB/ALDH7A1
KEGG_GLYCOSYLPHOSPHATIDYLINOSITOL_GPI_ANCHOR_BIOSYNTHESIS	KEGG_GLYCOSYLPHOSPHATIDYLINOSITOL_GPI_ANCHOR_BIOSYNTHESIS	24	0.459519	1.01899	0.456083	0.751692	0.653452	1990	tags=25%, list=13%, signal=22%	80055/5277/8818/5279/9488/9091	PGAP1/PIGA/DPM2/PIGC/PIGB/PIGQ
KEGG_VALINE_LEUCINE_AND_ISOLEUCINE_DEGRADATION	KEGG_VALINE_LEUCINE_AND_ISOLEUCINE_DEGRADATION	42	0.411423	0.998426	0.474941	0.763354	0.66359	974	tags=7%, list=6%, signal=7%	259307/1738/3157	IL4I1/DLD/HMGCS1
KEGG_PYRIMIDINE_METABOLISM	KEGG_PYRIMIDINE_METABOLISM	91	0.370443	0.996281	0.478488	0.763354	0.66359	704	tags=5%, list=5%, signal=5%	129607/51733/51251/87178/4860	CMPK2/UPB1/NT5C3A/PNPT1/PNP
KEGG_N_GLYCAN_BIOSYNTHESIS	KEGG_N_GLYCAN_BIOSYNTHESIS	46	0.404196	0.994707	0.479517	0.763354	0.66359	3057	tags=33%, list=20%, signal=26%	85365/4247/8818/6185/1650/57171/8813/84920/29880/6184/2683/4124/11253/4248/11282	ALG2/MGAT2/DPM2/RPN2/DDOST/DOLPP1/DPM1/ALG10/ALG5/RPN1/B4GALT1/MAN2A1/MAN1B1/MGAT3/MGAT4B
KEGG_GLYCOSPHINGOLIPID_BIOSYNTHESIS_GANGLIO_SERIES	KEGG_GLYCOSPHINGOLIPID_BIOSYNTHESIS_GANGLIO_SERIES	13	0.500251	1.00443	0.480312	0.763354	0.66359	707	tags=23%, list=5%, signal=22%	6489/6483/6482	ST8SIA1/ST3GAL2/ST3GAL1
KEGG_REGULATION_OF_ACTIN_CYTOSKELETON	KEGG_REGULATION_OF_ACTIN_CYTOSKELETON	175	0.347848	0.99537	0.491316	0.770696	0.669972	2302	tags=19%, list=15%, signal=16%	3696/3985/5291/3685/2768/1398/103910/3688/5063/23365/324/8394/23533/7114/56034/5154/81/5500/2260/5747/10298/5295/2254/3682/10458/3845/673/3687/3672/4627/2934/55845/54434	ITGB8/LIMK2/PIK3CB/ITGAV/GNA12/CRK/MYL12B/ITGB1/PAK3/ARHGEF12/APC/PIP5K1A/PIK3R5/TMSB4X/PDGFC/PDGFA/ACTN4/PPP1CB/FGFR1/PTK2/PAK4/PIK3R1/FGF9/ITGAE/BAIAP2/KRAS/BRAF/ITGAX/ITGA1/MYH9/GSN/BRK1/SSH1
KEGG_BASAL_TRANSCRIPTION_FACTORS	KEGG_BASAL_TRANSCRIPTION_FACTORS	32	0.423292	0.985022	0.493592	0.770696	0.669972	3119	tags=34%, list=20%, signal=27%	6875/2959/2960/6880/2967/2963/6873/2957/54457/6872/51616	TAF4B/GTF2B/GTF2E1/TAF9/GTF2H3/GTF2F2/TAF2/GTF2A1/TAF7L/TAF1/TAF9B
KEGG_WNT_SIGNALING_PATHWAY	KEGG_WNT_SIGNALING_PATHWAY	126	0.350533	0.974646	0.518531	0.802596	0.697704	2005	tags=19%, list=13%, signal=17%	7471/595/80326/85409/8323/5467/10725/85407/6907/7855/4772/4773/324/5663/7474/5516/1452/816/23291/5599/9978/79718/7483/5534	WNT1/CCND1/WNT10A/NKD2/FZD6/PPARD/NFAT5/NKD1/TBL1X/FZD5/NFATC1/NFATC2/APC/PSEN1/WNT5A/PPP2CB/CSNK1A1/CAMK2B/FBXW11/MAPK8/RBX1/TBL1XR1/WNT9A/PPP3R1
KEGG_ENDOMETRIAL_CANCER	KEGG_ENDOMETRIAL_CANCER	50	0.38331	0.953881	0.535751	0.819438	0.712344	3464	tags=34%, list=23%, signal=26%	595/5291/324/23533/2002/5295/3845/673/1495/4893/5604/6655/2885/6934/8312/2309/5605	CCND1/PIK3CB/APC/PIK3R5/ELK1/PIK3R1/KRAS/BRAF/CTNNA1/NRAS/MAP2K1/SOS2/GRB2/TCF7L2/AXIN1/FOXO3/MAP2K2
KEGG_MELANOMA	KEGG_MELANOMA	50	0.381503	0.949384	0.542297	0.819438	0.712344	3151	tags=32%, list=21%, signal=26%	595/5291/1871/23533/56034/5154/2260/5295/2254/3845/673/4893/1026/5604/5155/4233	CCND1/PIK3CB/E2F3/PIK3R5/PDGFC/PDGFA/FGFR1/PIK3R1/FGF9/KRAS/BRAF/NRAS/CDKN1A/MAP2K1/PDGFB/MET
KEGG_TRYPTOPHAN_METABOLISM	KEGG_TRYPTOPHAN_METABOLISM	30	0.40841	0.940562	0.549466	0.819438	0.712344	1322	tags=13%, list=9%, signal=12%	259307/8942/10352/7453	IL4I1/KYNU/WARS2/WARS1
KEGG_GLYCINE_SERINE_AND_THREONINE_METABOLISM	KEGG_GLYCINE_SERINE_AND_THREONINE_METABOLISM	23	-0.352023	-0.93456	0.549587	0.819438	0.712344	1286	tags=17%, list=8%, signal=16%	2593/26227/5723/2731	GAMT/PHGDH/PSPH/GLDC
KEGG_TERPENOID_BACKBONE_BIOSYNTHESIS	KEGG_TERPENOID_BACKBONE_BIOSYNTHESIS	13	0.466441	0.936545	0.55243	0.819438	0.712344	2944	tags=46%, list=19%, signal=37%	3157/79947/3156/4597/23590/39	HMGCS1/DHDDS/HMGCR/MVD/PDSS1/ACAT2
KEGG_UBIQUITIN_MEDIATED_PROTEOLYSIS	KEGG_UBIQUITIN_MEDIATED_PROTEOLYSIS	131	0.340744	0.951368	0.559914	0.823084	0.715514	3103	tags=31%, list=20%, signal=25%	8651/330/329/5371/7328/9021/9320/7320/4734/23327/25847/134111/3093/996/10393/7324/997/23291/51366/83737/118424/9978/8925/8697/22888/10075/64326/140739/54926/57448/7337/9616/8453/65264/331/7322/1643/55958/7321/55236/9063	SOCS1/BIRC3/BIRC2/PML/UBE2H/SOCS3/TRIP12/UBE2B/NEDD4/NEDD4L/ANAPC13/UBE2QL1/UBE2K/CDC27/ANAPC10/UBE2E1/CDC34/FBXW11/UBR5/ITCH/UBE2J2/RBX1/HERC1/CDC23/UBOX5/HUWE1/COP1/UBE2F/UBE2R2/BIRC6/UBE3A/RNF7/CUL2/UBE2Z/XIAP/UBE2D2/DDB2/KLHL9/UBE2D1/UBA6/PIAS2
KEGG_NOTCH_SIGNALING_PATHWAY	KEGG_NOTCH_SIGNALING_PATHWAY	45	0.378359	0.928239	0.56923	0.823084	0.715514	1765	tags=24%, list=12%, signal=22%	151636/3714/4851/8650/3955/9794/4853/28514/5663/3516/6868	DTX3L/JAG2/NOTCH1/NUMB/LFNG/MAML1/NOTCH2/DLL1/PSEN1/RBPJ/ADAM17
KEGG_GLYCEROLIPID_METABOLISM	KEGG_GLYCEROLIPID_METABOLISM	40	-0.311735	-0.931438	0.57302	0.823084	0.715514	2526	tags=40%, list=16%, signal=33%	1606/132158/150763/10554/223/26007/224/219/160851/8525/154141/1608/10327/501/231/8694	DGKA/GLYCTK/GPAT2/AGPAT1/ALDH9A1/TKFC/ALDH3A2/ALDH1B1/DGKH/DGKZ/MBOAT1/DGKG/AKR1A1/ALDH7A1/AKR1B1/DGAT1
KEGG_ONE_CARBON_POOL_BY_FOLATE	KEGG_ONE_CARBON_POOL_BY_FOLATE	15	0.445749	0.917383	0.573384	0.823084	0.715514	2312	tags=27%, list=15%, signal=23%	10797/10588/4548/25902	MTHFD2/MTHFS/MTR/MTHFD1L
KEGG_AXON_GUIDANCE	KEGG_AXON_GUIDANCE	106	0.33797	0.92331	0.598526	0.852302	0.740913	2225	tags=25%, list=15%, signal=22%	90249/3985/3983/8482/10725/2043/10512/3688/25/5063/10371/23365/4772/4773/57522/2773/5747/10298/9901/54910/27289/5534/10154/2534/3897/3845/5361	UNC5A/LIMK2/ABLIM1/SEMA7A/NFAT5/EPHA4/SEMA3C/ITGB1/ABL1/PAK3/SEMA3A/ARHGEF12/NFATC1/NFATC2/SRGAP1/GNAI3/PTK2/PAK4/SRGAP3/SEMA4C/RND1/PPP3R1/PLXNC1/FYN/L1CAM/KRAS/PLXNA1
KEGG_GLYOXYLATE_AND_DICARBOXYLATE_METABOLISM	KEGG_GLYOXYLATE_AND_DICARBOXYLATE_METABOLISM	14	-0.370773	-0.87791	0.621319	0.877737	0.763024	2410	tags=36%, list=16%, signal=30%	132158/441024/125061/283871/9380	GLYCTK/MTHFD2L/AFMID/PGP/GRHPR
KEGG_DRUG_METABOLISM_CYTOCHROME_P450	KEGG_DRUG_METABOLISM_CYTOCHROME_P450	27	0.384196	0.869451	0.636965	0.891925	0.775357	1165	tags=11%, list=8%, signal=10%	1577/9446/119391	CYP3A5/GSTO1/GSTO2
KEGG_REGULATION_OF_AUTOPHAGY	KEGG_REGULATION_OF_AUTOPHAGY	19	0.402638	0.859804	0.641841	0.891925	0.775357	3342	tags=37%, list=22%, signal=29%	3458/30849/23710/5289/115201/8678/8408	IFNG/PIK3R4/GABARAPL1/PIK3C3/ATG4A/BECN1/ULK1
KEGG_ANTIGEN_PROCESSING_AND_PRESENTATION	KEGG_ANTIGEN_PROCESSING_AND_PRESENTATION	64	0.341613	0.880035	0.646395	0.891925	0.775357	2886	tags=23%, list=19%, signal=19%	1514/3812/6890/5641/4049/3105/2923/925/821/3117/3133/567/1508/3805/3809	CTSL/KIR3DL2/TAP1/LGMN/LTA/HLA-A/PDIA3/CD8A/CANX/HLA-DQA1/HLA-E/B2M/CTSB/KIR2DL4/KIR2DS4
KEGG_OTHER_GLYCAN_DEGRADATION	KEGG_OTHER_GLYCAN_DEGRADATION	15	-0.349595	-0.840241	0.670259	0.902508	0.784558	4545	tags=33%, list=30%, signal=23%	2517/2720/23324/10825/64772	FUCA1/GLB1/MAN2B2/NEU3/ENGASE
KEGG_NON_SMALL_CELL_LUNG_CANCER	KEGG_NON_SMALL_CELL_LUNG_CANCER	51	-0.280894	-0.880969	0.677568	0.902508	0.784558	2210	tags=27%, list=14%, signal=24%	5925/7157/6257/5336/2272/2064/1029/5595/5578/3265/5582/11186/8503/5579	RB1/TP53/RXRB/PLCG2/FHIT/ERBB2/CDKN2A/MAPK3/PRKCA/HRAS/PRKCG/RASSF1/PIK3R3/PRKCB
KEGG_BETA_ALANINE_METABOLISM	KEGG_BETA_ALANINE_METABOLISM	20	0.375995	0.810293	0.70049	0.902508	0.784558	192	tags=5%, list=1%, signal=5%	51733	UPB1
KEGG_LEUKOCYTE_TRANSENDOTHELIAL_MIGRATION	KEGG_LEUKOCYTE_TRANSENDOTHELIAL_MIGRATION	94	0.316705	0.854954	0.701161	0.902508	0.784558	1757	tags=17%, list=11%, signal=15%	3383/5291/1500/50848/103910/3688/5906/23533/5908/3702/394/83593/2773/81/5747/5295	ICAM1/PIK3CB/CTNND1/F11R/MYL12B/ITGB1/RAP1A/PIK3R5/RAP1B/ITK/ARHGAP5/RASSF5/GNAI3/ACTN4/PTK2/PIK3R1
KEGG_INOSITOL_PHOSPHATE_METABOLISM	KEGG_INOSITOL_PHOSPHATE_METABOLISM	50	0.335109	0.833932	0.702087	0.902508	0.784558	1347	tags=16%, list=9%, signal=15%	5291/3632/9562/8871/64768/253430/8394/7167	PIK3CB/INPP5A/MINPP1/SYNJ2/IPPK/IPMK/PIP5K1A/TPI1
KEGG_PROGESTERONE_MEDIATED_OOCYTE_MATURATION	KEGG_PROGESTERONE_MEDIATED_OOCYTE_MATURATION	74	0.322208	0.845434	0.704639	0.902508	0.784558	2388	tags=20%, list=16%, signal=17%	27330/5291/8900/25847/23533/996/6197/10393/2773/5295/5599/8697/3845/673/1432	RPS6KA6/PIK3CB/CCNA1/ANAPC13/PIK3R5/CDC27/RPS6KA3/ANAPC10/GNAI3/PIK3R1/MAPK8/CDC23/KRAS/BRAF/MAPK14
KEGG_TASTE_TRANSDUCTION	KEGG_TASTE_TRANSDUCTION	21	-0.315891	-0.821053	0.710348	0.902508	0.784558	1531	tags=19%, list=10%, signal=17%	54429/112/5566/5330	TAS2R5/ADCY6/PRKACA/PLCB2
KEGG_SELENOAMINO_ACID_METABOLISM	KEGG_SELENOAMINO_ACID_METABOLISM	22	0.367148	0.803639	0.711094	0.902508	0.784558	437	tags=9%, list=3%, signal=9%	9060/1491	PAPSS2/CTH
KEGG_OLFACTORY_TRANSDUCTION	KEGG_OLFACTORY_TRANSDUCTION	30	-0.295716	-0.832233	0.716293	0.902508	0.784558	3760	tags=57%, list=25%, signal=43%	26689/128372/81442/5567/26664/391114/79290/5592/5593/409/163688/818/3000/157/5566/808/817	OR4D1/OR6N1/OR6N2/PRKACB/OR7C1/OR6K3/OR13A1/PRKG1/PRKG2/ARRB2/CALML6/CAMK2G/GUCY2D/GRK3/PRKACA/CALM3/CAMK2D
KEGG_GLIOMA	KEGG_GLIOMA	59	-0.266925	-0.862675	0.724884	0.902508	0.784558	2210	tags=22%, list=14%, signal=19%	5925/7157/5336/1029/5595/5578/3480/808/3265/5582/817/8503/5579	RB1/TP53/PLCG2/CDKN2A/MAPK3/PRKCA/IGF1R/CALM3/HRAS/PRKCG/CAMK2D/PIK3R3/PRKCB
KEGG_CIRCADIAN_RHYTHM_MAMMAL	KEGG_CIRCADIAN_RHYTHM_MAMMAL	13	0.385941	0.774914	0.726159	0.902508	0.784558	3459	tags=31%, list=23%, signal=24%	8553/1407/79365/8864	BHLHE40/CRY1/BHLHE41/PER2
KEGG_ALDOSTERONE_REGULATED_SODIUM_REABSORPTION	KEGG_ALDOSTERONE_REGULATED_SODIUM_REABSORPTION	33	0.342825	0.801518	0.726633	0.902508	0.784558	2115	tags=24%, list=14%, signal=21%	5291/486/23327/23533/476/5295/483/3845	PIK3CB/FXYD2/NEDD4L/PIK3R5/ATP1A1/PIK3R1/ATP1B3/KRAS
KEGG_HOMOLOGOUS_RECOMBINATION	KEGG_HOMOLOGOUS_RECOMBINATION	28	-0.296026	-0.82112	0.729374	0.902508	0.784558	3583	tags=39%, list=23%, signal=30%	5888/6117/25788/5893/57804/146956/5890/5424/5892/7517/80198	RAD51/RPA1/RAD54B/RAD52/POLD4/EME1/RAD51B/POLD1/RAD51D/XRCC3/MUS81
KEGG_PURINE_METABOLISM	KEGG_PURINE_METABOLISM	133	0.304124	0.850157	0.730661	0.902508	0.784558	1631	tags=10%, list=11%, signal=9%	205/5142/5141/51251/9060/87178/5144/4860/2987/2766/272/50484/5315	AK4/PDE4B/PDE4A/NT5C3A/PAPSS2/PNPT1/PDE4D/PNP/GUK1/GMPR/AMPD3/RRM2B/PKM
KEGG_CITRATE_CYCLE_TCA_CYCLE	KEGG_CITRATE_CYCLE_TCA_CYCLE	28	-0.295205	-0.818841	0.732802	0.902508	0.784558	3822	tags=36%, list=25%, signal=27%	4190/8803/3421/4967/5160/8802/47/3417/8801/3419	MDH1/SUCLA2/IDH3G/OGDH/PDHA1/SUCLG1/ACLY/IDH1/SUCLG2/IDH3A
KEGG_PEROXISOME	KEGG_PEROXISOME	70	0.315289	0.821939	0.736188	0.902508	0.784558	1362	tags=10%, list=9%, signal=9%	6648/2182/5193/11001/25824/2180/8309	SOD2/ACSL4/PEX12/SLC27A2/PRDX5/ACSL1/ACOX2
KEGG_GLUTATHIONE_METABOLISM	KEGG_GLUTATHIONE_METABOLISM	39	0.332679	0.79836	0.74026	0.902508	0.784558	1678	tags=18%, list=11%, signal=16%	9446/2729/119391/2882/290/50484/51056	GSTO1/GCLC/GSTO2/GPX7/ANPEP/RRM2B/LAP3
KEGG_PRIMARY_BILE_ACID_BIOSYNTHESIS	KEGG_PRIMARY_BILE_ACID_BIOSYNTHESIS	10	0.385503	0.743513	0.74722	0.904797	0.786547	3145	tags=30%, list=21%, signal=24%	8309/80270/9420	ACOX2/HSD3B7/CYP7B1
KEGG_ETHER_LIPID_METABOLISM	KEGG_ETHER_LIPID_METABOLISM	21	-0.300126	-0.780078	0.76512	0.911553	0.792421	2780	tags=38%, list=18%, signal=31%	8398/8540/100137049/5050/81579/5338/254531/8681	PLA2G6/AGPS/PLA2G4B/PAFAH1B3/PLA2G12A/PLD2/LPCAT4/JMJD7-PLA2G4B
KEGG_GLYCOSAMINOGLYCAN_BIOSYNTHESIS_HEPARAN_SULFATE	KEGG_GLYCOSAMINOGLYCAN_BIOSYNTHESIS_HEPARAN_SULFATE	19	0.349604	0.746553	0.770248	0.911553	0.792421	261	tags=5%, list=2%, signal=5%	9953	HS3ST3B1
KEGG_ABC_TRANSPORTERS	KEGG_ABC_TRANSPORTERS	32	-0.278135	-0.794111	0.777696	0.911553	0.792421	7	tags=12%, list=0%, signal=13%	23461/21/10347/368	ABCA5/ABCA3/ABCA7/ABCC6
KEGG_B_CELL_RECEPTOR_SIGNALING_PATHWAY	KEGG_B_CELL_RECEPTOR_SIGNALING_PATHWAY	73	0.303041	0.793873	0.777819	0.911553	0.792421	3149	tags=32%, list=21%, signal=25%	4790/5291/10892/10725/25780/118788/4792/4772/4773/23533/5295/8519/5534/3845/4067/5970/27071/4893/5604/5533/6655/2885/8517	NFKB1/PIK3CB/MALT1/NFAT5/RASGRP3/PIK3AP1/NFKBIA/NFATC1/NFATC2/PIK3R5/PIK3R1/IFITM1/PPP3R1/KRAS/LYN/RELA/DAPP1/NRAS/MAP2K1/PPP3CC/SOS2/GRB2/IKBKG
KEGG_FRUCTOSE_AND_MANNOSE_METABOLISM	KEGG_FRUCTOSE_AND_MANNOSE_METABOLISM	30	0.326723	0.752437	0.782693	0.911553	0.792421	1963	tags=20%, list=13%, signal=17%	5209/3099/5214/7167/3098/9107	PFKFB3/HK2/PFKP/TPI1/HK1/MTMR6
KEGG_MELANOGENESIS	KEGG_MELANOGENESIS	81	0.299579	0.794645	0.783526	0.911553	0.792421	2231	tags=16%, list=15%, signal=14%	1906/7471/80326/8323/4157/7855/7474/816/2773/7483/3815/3845/10488	EDN1/WNT1/WNT10A/FZD6/MC1R/FZD5/WNT5A/CAMK2B/GNAI3/WNT9A/KIT/KRAS/CREB3
KEGG_RIBOFLAVIN_METABOLISM	KEGG_RIBOFLAVIN_METABOLISM	15	0.342276	0.704427	0.802676	0.926873	0.805738	4335	tags=47%, list=28%, signal=33%	9107/52/54/8898/53/55/55312	MTMR6/ACP1/ACP5/MTMR2/ACP2/ACP3/RFK
KEGG_FC_GAMMA_R_MEDIATED_PHAGOCYTOSIS	KEGG_FC_GAMMA_R_MEDIATED_PHAGOCYTOSIS	92	-0.242552	-0.845484	0.807109	0.926873	0.805738	1885	tags=17%, list=12%, signal=15%	5336/6850/1759/5595/10095/5578/55616/5581/1794/8936/5338/5582/8396/8503/5579/8853	PLCG2/SYK/DNM1/MAPK3/ARPC1B/PRKCA/ASAP3/PRKCE/DOCK2/WASF1/PLD2/PRKCG/PIP4K2B/PIK3R3/PRKCB/ASAP2
KEGG_RNA_POLYMERASE	KEGG_RNA_POLYMERASE	29	-0.266917	-0.746154	0.833426	0.95096	0.826677	4594	tags=45%, list=30%, signal=31%	5438/548644/55703/84265/5435/51728/64425/84172/5433/10622/9533/171568/661	POLR2I/POLR2J3/POLR3B/POLR3GL/POLR2F/POLR3K/POLR1E/POLR1B/POLR2D/POLR3G/POLR1C/POLR3H/POLR3D
KEGG_TIGHT_JUNCTION	KEGG_TIGHT_JUNCTION	101	0.279295	0.759597	0.845555	0.958655	0.833367	1668	tags=13%, list=11%, signal=12%	23136/6714/84552/51776/5872/7525/50848/103910/5584/5516/93643/2773/81	EPB41L3/SRC/PARD6G/MAP3K20/RAB13/YES1/F11R/MYL12B/PRKCI/PPP2CB/TJAP1/GNAI3/ACTN4
KEGG_STARCH_AND_SUCROSE_METABOLISM	KEGG_STARCH_AND_SUCROSE_METABOLISM	23	0.307061	0.676659	0.852	0.959848	0.834403	1669	tags=17%, list=11%, signal=16%	3099/2821/2997/3098	HK2/GPI/GYS1/HK1
KEGG_SNARE_INTERACTIONS_IN_VESICULAR_TRANSPORT	KEGG_SNARE_INTERACTIONS_IN_VESICULAR_TRANSPORT	37	0.290052	0.690911	0.862223	0.96486	0.838761	1998	tags=22%, list=13%, signal=19%	6845/9554/10228/6616/9527/51272/53407/9570	VAMP7/SEC22B/STX6/SNAP25/GOSR1/BET1L/STX18/GOSR2
KEGG_PRIMARY_IMMUNODEFICIENCY	KEGG_PRIMARY_IMMUNODEFICIENCY	34	0.287713	0.676015	0.872991	0.96486	0.838761	546	tags=6%, list=4%, signal=6%	29851/6890	ICOS/TAP1
KEGG_VIBRIO_CHOLERAE_INFECTION	KEGG_VIBRIO_CHOLERAE_INFECTION	48	0.280835	0.695208	0.873448	0.96486	0.838761	2791	tags=27%, list=18%, signal=22%	30001/245973/529/51606/10952/23480/9296/523/528/29927/526/245972/23545	ERO1A/ATP6V1C2/ATP6V1E1/ATP6V1H/SEC61B/SEC61G/ATP6V1F/ATP6V1A/ATP6V1C1/SEC61A1/ATP6V1B2/ATP6V0D2/ATP6V0A2
KEGG_FATTY_ACID_METABOLISM	KEGG_FATTY_ACID_METABOLISM	32	-0.249466	-0.712259	0.88164	0.96486	0.838761	3930	tags=38%, list=26%, signal=28%	37/1892/2639/1375/1962/30/1632/223/3033/224/219/501	ACADVL/ECHS1/GCDH/CPT1B/EHHADH/ACAA1/ECI1/ALDH9A1/HADH/ALDH3A2/ALDH1B1/ALDH7A1
KEGG_VASOPRESSIN_REGULATED_WATER_REABSORPTION	KEGG_VASOPRESSIN_REGULATED_WATER_REABSORPTION	39	-0.24481	-0.72806	0.883552	0.96486	0.838761	2698	tags=26%, list=18%, signal=21%	8655/140735/6844/79659/148327/112/1639/4905/5566/1385	DYNLL1/DYNLL2/VAMP2/DYNC2H1/CREB3L4/ADCY6/DCTN1/NSF/PRKACA/CREB1
KEGG_VALINE_LEUCINE_AND_ISOLEUCINE_BIOSYNTHESIS	KEGG_VALINE_LEUCINE_AND_ISOLEUCINE_BIOSYNTHESIS	10	-0.282408	-0.617485	0.890588	0.966614	0.840286	2963	tags=50%, list=19%, signal=40%	55699/57176/5160/51520/587	IARS2/VARS2/PDHA1/LARS1/BCAT2
KEGG_AMINOACYL_TRNA_BIOSYNTHESIS	KEGG_AMINOACYL_TRNA_BIOSYNTHESIS	41	0.259542	0.627725	0.927013	0.991512	0.861929	2074	tags=22%, list=14%, signal=19%	6897/10352/7453/8565/2617/3376/833/57038/23395	TARS1/WARS2/WARS1/YARS1/GARS1/IARS1/CARS1/RARS2/LARS2
KEGG_CELL_CYCLE	KEGG_CELL_CYCLE	122	0.25081	0.695397	0.930467	0.991512	0.861929	3130	tags=22%, list=20%, signal=18%	595/8900/7042/7532/25/4998/10735/1871/7040/25847/996/10393/8379/9978/8697/4088/1874/1022/894/902/4089/1026/4616/7533/4175/7534/5001	CCND1/CCNA1/TGFB2/YWHAG/ABL1/ORC1/STAG2/E2F3/TGFB1/ANAPC13/CDC27/ANAPC10/MAD1L1/RBX1/CDC23/SMAD3/E2F4/CDK7/CCND2/CCNH/SMAD4/CDKN1A/GADD45B/YWHAH/MCM6/YWHAZ/ORC5
KEGG_OOCYTE_MEIOSIS	KEGG_OOCYTE_MEIOSIS	97	0.248431	0.672663	0.938765	0.991512	0.861929	2005	tags=14%, list=13%, signal=13%	27330/9748/7532/25847/5516/996/6197/10393/816/23291/5500/9978/8697/5534	RPS6KA6/SLK/YWHAG/ANAPC13/PPP2CB/CDC27/RPS6KA3/ANAPC10/CAMK2B/FBXW11/PPP1CB/RBX1/CDC23/PPP3R1
KEGG_FC_EPSILON_RI_SIGNALING_PATHWAY	KEGG_FC_EPSILON_RI_SIGNALING_PATHWAY	64	0.249426	0.64255	0.939599	0.991512	0.861929	3135	tags=31%, list=20%, signal=25%	7124/5291/6416/23533/3937/5295/5599/2534/3845/4067/1432/5321/4893/5600/9846/5604/5606/6655/2885/2207	TNF/PIK3CB/MAP2K4/PIK3R5/LCP2/PIK3R1/MAPK8/FYN/KRAS/LYN/MAPK14/PLA2G4A/NRAS/MAPK11/GAB2/MAP2K1/MAP2K3/SOS2/GRB2/FCER1G
KEGG_MISMATCH_REPAIR	KEGG_MISMATCH_REPAIR	23	-0.229834	-0.61017	0.941379	0.991512	0.861929	3972	tags=35%, list=26%, signal=26%	4437/3978/2956/6117/4436/57804/27030/5424	MSH3/LIG1/MSH6/RPA1/MSH2/POLD4/MLH3/POLD1
KEGG_BIOSYNTHESIS_OF_UNSATURATED_FATTY_ACIDS	KEGG_BIOSYNTHESIS_OF_UNSATURATED_FATTY_ACIDS	20	-0.221893	-0.570177	0.95592	1	0.869308	3146	tags=20%, list=21%, signal=16%	30/54898/55825/79966	ACAA1/ELOVL2/PECR/SCD5
KEGG_DNA_REPLICATION	KEGG_DNA_REPLICATION	36	-0.205496	-0.601112	0.97046	1	0.869308	3595	tags=22%, list=23%, signal=17%	5558/3978/5422/6117/57804/5424/56655/84153	PRIM2/LIG1/POLA1/RPA1/POLD4/POLD1/POLE4/RNASEH2C
KEGG_AMINO_SUGAR_AND_NUCLEOTIDE_SUGAR_METABOLISM	KEGG_AMINO_SUGAR_AND_NUCLEOTIDE_SUGAR_METABOLISM	42	0.226519	0.549707	0.972695	1	0.869308	3964	tags=33%, list=26%, signal=25%	3099/6675/2821/3098/1727/29925/55907/7264/9945/64841/10007/132789/10020/5238	HK2/UAP1/GPI/HK1/CYB5R3/GMPPB/CMAS/GFUS/GFPT2/GNPNAT1/GNPDA1/GNPDA2/GNE/PGM3
KEGG_NUCLEOTIDE_EXCISION_REPAIR	KEGG_NUCLEOTIDE_EXCISION_REPAIR	44	0.190264	0.465119	0.994385	1	0.869308	3193	tags=25%, list=21%, signal=20%	2967/9978/4331/1022/902/5982/2074/7508/5886/1643/6118	GTF2H3/RBX1/MNAT1/CDK7/CCNH/RFC2/ERCC6/XPC/RAD23A/DDB2/RPA2
KEGG_OXIDATIVE_PHOSPHORYLATION	KEGG_OXIDATIVE_PHOSPHORYLATION	119	0.183868	0.508222	0.999168	1	0.869308	5167	tags=34%, list=34%, signal=22%	245973/529/9167/51606/9296/4719/523/528/10063/4714/526/4700/245972/23545/4717/4724/4715/537/4725/7386/9114/1346/6390/1351/1347/7385/1349/4698/4697/27068/7381/4712/1340/515/6392/125965/9550/4704/4705/1537	ATP6V1C2/ATP6V1E1/COX7A2L/ATP6V1H/ATP6V1F/NDUFS1/ATP6V1A/ATP6V1C1/COX17/NDUFB8/ATP6V1B2/NDUFA6/ATP6V0D2/ATP6V0A2/NDUFC1/NDUFS4/NDUFB9/ATP6AP1/NDUFS5/UQCRFS1/ATP6V0D1/COX7A1/SDHB/COX8A/COX7A2/UQCRC2/COX7B/NDUFA5/NDUFA4/PPA2/UQCRB/NDUFB6/COX6B1/ATP5PB/SDHD/COX6B2/ATP6V1G1/NDUFA9/NDUFA10/CYC1
KEGG_HUNTINGTONS_DISEASE	KEGG_HUNTINGTONS_DISEASE	163	0.181482	0.516252	0.999664	1	0.869308	4728	tags=29%, list=31%, signal=20%	6648/6875/836/9167/1213/5468/4719/5440/163/10488/4714/10540/5439/4700/7052/5432/4717/64764/4724/4715/3064/51164/4725/6647/7386/1346/5431/6390/1212/1351/2033/1347/7385/54205/1349/4698/4697/23186/7381/1387/7419/2902/2776/7416/4712/1340/515	SOD2/TAF4B/CASP3/COX7A2L/CLTC/PPARG/NDUFS1/POLR2K/AP2B1/CREB3/NDUFB8/DCTN2/POLR2J/NDUFA6/TGM2/POLR2C/NDUFC1/CREB3L2/NDUFS4/NDUFB9/HTT/DCTN4/NDUFS5/SOD1/UQCRFS1/COX7A1/POLR2B/SDHB/CLTB/COX8A/EP300/COX7A2/UQCRC2/CYCS/COX7B/NDUFA5/NDUFA4/RCOR1/UQCRB/CREBBP/VDAC3/GRIN1/GNAQ/VDAC1/NDUFB6/COX6B1/ATP5PB
KEGG_SPLICEOSOME	KEGG_SPLICEOSOME	123	-0.151017	-0.550747	0.999718	1	0.869308	3136	tags=15%, list=20%, signal=12%	25766/6426/6430/51690/6634/25804/22985/8683/10929/6434/29896/10523/1655/11338/6431/3192/10450/6625/3312	PRPF40B/SRSF1/SRSF5/LSM7/SNRPD3/LSM4/ACIN1/SRSF9/SRSF8/TRA2B/TRA2A/CHERP/DDX5/U2AF2/SRSF6/HNRNPU/PPIE/SNRNP70/HSPA8
KEGG_PATHOGENIC_ESCHERICHIA_COLI_INFECTION	KEGG_PATHOGENIC_ESCHERICHIA_COLI_INFECTION	50	-0.124732	-0.389512	0.999962	1	0.869308	4442	tags=26%, list=29%, signal=19%	81873/7100/10376/203068/71/23643/7846/10383/7454/3059/60/10095/5578	ARPC5L/TLR5/TUBA1B/TUBB/ACTG1/LY96/TUBA1A/TUBB4B/WAS/HCLS1/ACTB/ARPC1B/PRKCA
KEGG_PARKINSONS_DISEASE	KEGG_PARKINSONS_DISEASE	115	-0.146547	-0.528555	1	1	0.869308	4234	tags=24%, list=28%, signal=18%	4722/4695/517/4512/291/51465/4513/374291/4711/4713/4723/4731/5481/27429/4716/4726/4509/513/317/6571/4537/4708/7327/7317/7384/7326/120892/7318	NDUFS3/NDUFA2/ATP5MC2/MT-CO1/SLC25A4/UBE2J1/MT-CO2/NDUFS7/NDUFB5/NDUFB7/NDUFV1/NDUFV3/PPID/HTRA2/NDUFB10/NDUFS6/MT-ATP8/ATP5F1D/APAF1/SLC18A2/MT-ND3/NDUFB2/UBE2G2/UBA1/UQCRC1/UBE2G1/LRRK2/UBA7

## Sheet: C5_GOBP
ID	Description	setSize	enrichmentScore	NES	pvalue	p.adjust	qvalues	rank	leading_edge	core_enrichment	core_enrichment_symbols
GO_RESPONSE_TO_BACTERIUM	GO_RESPONSE_TO_BACTERIUM	445	0.702891	2.10792	3.15812e-22	1.47516e-18	1.16119e-18	1144	tags=21%, list=7%, signal=20%	6364/3552/3553/2853/2706/2921/5743/6590/6348/8288/29126/84419/2920/3576/2919/6037/5996/3656/9636/718/4283/129607/6347/671/384/51561/1906/5272/1511/356/654/1991/3383/664/114548/941/1233/1053/4790/5142/7124/7098/1236/3586/4791/7035/55008/84868/6714/22904/7133/2643/79132/10561/7128/115361/2634/115362/944/820/10133/51510/79155/558/80149/4016/148022/10892/5144/1604/5467/116844/1439/8837/836/4851/1267/…	CCL20/IL1A/IL1B/GPR31/GJB2/CXCL3/PTGS2/SLPI/CCL3/EPX/CD274/C15orf48/CXCL2/CXCL8/CXCL1/RNASE3/RGS1/IRAK2/ISG15/C3/CXCL9/CMPK2/CCL2/BPI/ARG2/IL23A/EDN1/SERPINB9/CTSG/FASLG/BMP6/ELANE/ICAM1/BNIP3/NLRP3/CD80/CCR4/CEBPE/NFKB1/PDE4B/TNF/TLR3/CCR7/IL10/NFKB2/TFPI/HERC6/HAVCR2/SRC/SBNO2/TNFRSF1B/GCH1/DHX58/IFI44/TNFAIP3/GBP4/GBP2/GBP5/TNFSF8/CAMP/OPTN/CHMP5/TNIP2/AXL/ZC3H12A/LOXL1/TICAM1/MALT1/PDE4D/CD55…
GO_LEUKOCYTE_MIGRATION	GO_LEUKOCYTE_MIGRATION	371	0.693598	2.06901	3.9403e-17	9.20257e-14	7.24393e-14	1067	tags=19%, list=7%, signal=18%	6364/3553/6355/2921/414062/6348/6351/4680/6354/8288/2920/4973/3576/2919/26585/23657/4283/3269/6367/6347/3554/51561/2321/1906/1991/3383/8140/7057/1435/2838/5142/7124/4323/5979/2833/8740/1236/3586/6385/6714/5291/960/1880/7422/84830/9123/8784/3685/2995/9943/5657/965/4681/5144/5641/124976/101/7525/682/58515/1398/6729/30817/3577/2358/50848/7042/255231/3688	CCL20/IL1B/CCL8/CXCL3/CCL3L3/CCL3/CCL4/CEACAM6/CCL7/EPX/CXCL2/OLR1/CXCL8/CXCL1/GREM1/SLC7A11/CXCL9/HRH1/CCL22/CCL2/IL1R1/IL23A/FLT1/EDN1/ELANE/ICAM1/SLC7A5/THBS1/CSF1/GPR15/PDE4B/TNF/MMP14/RET/CXCR3/TNFSF14/CCR7/IL10/SDC4/SRC/PIK3CB/CD44/GPR183/VEGFA/ADTRP/SLC16A3/TNFRSF18/ITGAV/GYPC/OXSR1/PRTN3/CD58/NA/PDE4D/LGMN/SPNS2/ADAM8/YES1/BSG/SELENOK/CRK/SRP54/ADGRE2/CXCR1/FPR2/F11R/TGFB2/MCOLN2/ITGB1
GO_MYELOID_LEUKOCYTE_MIGRATION	GO_MYELOID_LEUKOCYTE_MIGRATION	169	0.781661	2.2286	7.33949e-16	1.14276e-12	8.99538e-13	1047	tags=22%, list=7%, signal=21%	6364/3553/6355/2921/414062/6348/6351/6354/8288/2920/3576/2919/26585/4283/3269/6367/6347/3554/51561/2321/1906/7057/1435/5142/4323/1236/7422/5657/4681/5144/5641/101/6729/30817/3577/2358/7042/255231	CCL20/IL1B/CCL8/CXCL3/CCL3L3/CCL3/CCL4/CCL7/EPX/CXCL2/CXCL8/CXCL1/GREM1/CXCL9/HRH1/CCL22/CCL2/IL1R1/IL23A/FLT1/EDN1/THBS1/CSF1/PDE4B/MMP14/CCR7/VEGFA/PRTN3/NA/PDE4D/LGMN/ADAM8/SRP54/ADGRE2/CXCR1/FPR2/TGFB2/MCOLN2
GO_RESPONSE_TO_MOLECULE_OF_BACTERIAL_ORIGIN	GO_RESPONSE_TO_MOLECULE_OF_BACTERIAL_ORIGIN	269	0.726206	2.13483	2.31604e-15	2.70456e-12	2.12893e-12	1144	tags=24%, list=7%, signal=22%	3552/3553/2853/2706/2921/5743/6590/6348/29126/2920/3576/2919/3656/4283/129607/6347/671/1906/1511/356/654/1991/3383/114548/941/1053/4790/5142/7124/1236/3586/4791/7035/84868/6714/22904/7133/2643/7128/51510/79155/558/80149/4016/148022/10892/5144/1604/5467/1439/836/4851/1267/79577/9516/23118/4049/55829/4792/7855/7494/25/4615/7431	IL1A/IL1B/GPR31/GJB2/CXCL3/PTGS2/SLPI/CCL3/CD274/CXCL2/CXCL8/CXCL1/IRAK2/CXCL9/CMPK2/CCL2/BPI/EDN1/CTSG/FASLG/BMP6/ELANE/ICAM1/NLRP3/CD80/CEBPE/NFKB1/PDE4B/TNF/CCR7/IL10/NFKB2/TFPI/HAVCR2/SRC/SBNO2/TNFRSF1B/GCH1/TNFAIP3/CHMP5/TNIP2/AXL/ZC3H12A/LOXL1/TICAM1/MALT1/PDE4D/CD55/PPARD/CSF2RB/CASP3/NOTCH1/CNP/CDC73/LITAF/TAB2/LTA/SELENOS/NFKBIA/FZD5/XBP1/ABL1/MYD88/VIM
GO_GRANULOCYTE_CHEMOTAXIS	GO_GRANULOCYTE_CHEMOTAXIS	95	0.853	2.30134	4.00128e-15	3.44585e-12	2.71245e-12	272	tags=22%, list=2%, signal=22%	6364/3553/6355/2921/414062/6348/6351/6354/2920/3576/2919/4283/3269/6367/6347/51561/1906/7057/1435/5142/1236	CCL20/IL1B/CCL8/CXCL3/CCL3L3/CCL3/CCL4/CCL7/CXCL2/CXCL8/CXCL1/CXCL9/HRH1/CCL22/CCL2/IL23A/EDN1/THBS1/CSF1/PDE4B/CCR7
GO_CELL_CHEMOTAXIS	GO_CELL_CHEMOTAXIS	233	0.735026	2.14311	4.42627e-15	3.44585e-12	2.71245e-12	892	tags=19%, list=6%, signal=18%	6364/3553/6355/2921/414062/6348/6351/6354/2920/3576/2919/26585/9034/4283/3269/6367/6347/51561/2321/1906/9732/7057/1233/1435/5142/2833/8740/1236/3586/1880/7422/57007/9943/4681/5144/5641/5872/101/10663/4851/1398/6729/30817/3577	CCL20/IL1B/CCL8/CXCL3/CCL3L3/CCL3/CCL4/CCL7/CXCL2/CXCL8/CXCL1/GREM1/CCRL2/CXCL9/HRH1/CCL22/CCL2/IL23A/FLT1/EDN1/DOCK4/THBS1/CCR4/CSF1/PDE4B/CXCR3/TNFSF14/CCR7/IL10/GPR183/VEGFA/ACKR3/OXSR1/NA/PDE4D/LGMN/RAB13/ADAM8/CXCR6/NOTCH1/CRK/SRP54/ADGRE2/CXCR1
GO_GRANULOCYTE_MIGRATION	GO_GRANULOCYTE_MIGRATION	113	0.828875	2.27823	6.77237e-15	4.51911e-12	3.55728e-12	892	tags=26%, list=6%, signal=24%	6364/3553/6355/2921/414062/6348/6351/6354/8288/2920/3576/2919/4283/3269/6367/6347/3554/51561/1906/7057/1435/5142/1236/5657/5144/101/6729/30817/3577	CCL20/IL1B/CCL8/CXCL3/CCL3L3/CCL3/CCL4/CCL7/EPX/CXCL2/CXCL8/CXCL1/CXCL9/HRH1/CCL22/CCL2/IL1R1/IL23A/EDN1/THBS1/CSF1/PDE4B/CCR7/PRTN3/PDE4D/ADAM8/SRP54/ADGRE2/CXCR1
GO_TAXIS	GO_TAXIS	492	0.632663	1.90247	1.73909e-14	1.01541e-11	7.99294e-12	971	tags=16%, list=6%, signal=15%	6364/3553/6355/2921/414062/6348/2152/6351/6354/5909/2920/644168/3576/2919/26585/2596/6037/9034/90249/4283/8013/3269/6367/6347/3908/51561/2321/1906/9732/5329/1991/7057/1233/1435/9638/5142/5979/2833/8740/1236/3586/8828/5328/5898/6714/5291/51332/1880/7422/57007/3685/9943/4914/57731/4681/4147/5144/5641/57549/5872/57688/8482/6036/101/10663/682/4851/214/1398/6712/6729/2043/30817/3577/10512/65249/2358	CCL20/IL1B/CCL8/CXCL3/CCL3L3/CCL3/F3/CCL4/CCL7/RAP1GAP/CXCL2/DRGX/CXCL8/CXCL1/GREM1/GAP43/RNASE3/CCRL2/UNC5A/CXCL9/NR4A3/HRH1/CCL22/CCL2/LAMA2/IL23A/FLT1/EDN1/DOCK4/PLAUR/ELANE/THBS1/CCR4/CSF1/NA/PDE4B/RET/CXCR3/TNFSF14/CCR7/IL10/NRP2/PLAU/RALA/SRC/PIK3CB/SPTBN5/GPR183/VEGFA/ACKR3/ITGAV/OXSR1/NTRK1/SPTBN4/MATN2/PDE4D/LGMN/IGSF9/RAB13/ZSWIM6/SEMA7A/RNASE2/ADAM8/CXCR6/BSG/NOTCH1/ALCAM/CRK/SPTBN2/SR…
GO_RESPONSE_TO_CHEMOKINE	GO_RESPONSE_TO_CHEMOKINE	69	0.881669	2.2873	3.20021e-14	1.60018e-11	1.2596e-11	563	tags=30%, list=4%, signal=29%	6364/6355/2921/414062/6348/6351/6354/2920/3576/2919/9034/4283/6367/6347/1906/1233/2833/1236/57007/9943/80149	CCL20/CCL8/CXCL3/CCL3L3/CCL3/CCL4/CCL7/CXCL2/CXCL8/CXCL1/CCRL2/CXCL9/CCL22/CCL2/EDN1/CCR4/CXCR3/CCR7/ACKR3/OXSR1/ZC3H12A
GO_NEUTROPHIL_CHEMOTAXIS	GO_NEUTROPHIL_CHEMOTAXIS	77	0.86683	2.28033	3.42578e-14	1.60018e-11	1.2596e-11	272	tags=23%, list=2%, signal=23%	6364/3553/6355/2921/414062/6348/6351/6354/2920/3576/2919/4283/6367/6347/51561/1906/5142/1236	CCL20/IL1B/CCL8/CXCL3/CCL3L3/CCL3/CCL4/CCL7/CXCL2/CXCL8/CXCL1/CXCL9/CCL22/CCL2/IL23A/EDN1/PDE4B/CCR7
GO_LEUKOCYTE_CHEMOTAXIS	GO_LEUKOCYTE_CHEMOTAXIS	179	0.757475	2.16788	1.2778e-13	5.42601e-11	4.27116e-11	656	tags=18%, list=4%, signal=18%	6364/3553/6355/2921/414062/6348/6351/6354/2920/3576/2919/26585/4283/3269/6367/6347/51561/2321/1906/7057/1435/5142/2833/8740/1236/3586/1880/7422/9943/4681/5144/5641/101	CCL20/IL1B/CCL8/CXCL3/CCL3L3/CCL3/CCL4/CCL7/CXCL2/CXCL8/CXCL1/GREM1/CXCL9/HRH1/CCL22/CCL2/IL23A/FLT1/EDN1/THBS1/CSF1/PDE4B/CXCR3/TNFSF14/CCR7/IL10/GPR183/VEGFA/OXSR1/NA/PDE4D/LGMN/ADAM8
GO_NEUTROPHIL_MIGRATION	GO_NEUTROPHIL_MIGRATION	92	0.837383	2.2516	2.73856e-13	1.06599e-10	8.39106e-11	656	tags=24%, list=4%, signal=23%	6364/3553/6355/2921/414062/6348/6351/6354/2920/3576/2919/4283/6367/6347/3554/51561/1906/5142/1236/5657/5144/101	CCL20/IL1B/CCL8/CXCL3/CCL3L3/CCL3/CCL4/CCL7/CXCL2/CXCL8/CXCL1/CXCL9/CCL22/CCL2/IL1R1/IL23A/EDN1/PDE4B/CCR7/PRTN3/PDE4D/ADAM8
GO_POSITIVE_REGULATION_OF_CYTOKINE_PRODUCTION	GO_POSITIVE_REGULATION_OF_CYTOKINE_PRODUCTION	392	0.646255	1.93112	3.35525e-13	1.20557e-10	9.48979e-11	1403	tags=20%, list=9%, signal=18%	3552/3553/5743/6348/64109/2152/8288/29126/10394/29923/2069/718/8013/3554/51561/9173/1991/8808/64135/8140/114548/941/7057/4790/5142/7124/7098/1236/3586/4791/84868/23586/6714/330/329/8877/79132/5005/6772/3665/136/115362/965/148022/10892/5144/3659/10211/8482/101/3458/4155/5045/10148/6774/58515/24145/5610/3428/4049/255231/10555/7855/7494/5004/4615/53833/2597/7040/5663/3105/7474/8772/10125/7186/719/36…	IL1A/IL1B/PTGS2/CCL3/CRLF2/F3/EPX/CD274/PRG3/HILPDA/EREG/C3/NR4A3/IL1R1/IL23A/IL1RL1/ELANE/IL1RL2/IFIH1/SLC7A5/NLRP3/CD80/THBS1/NFKB1/PDE4B/TNF/TLR3/CCR7/IL10/NFKB2/HAVCR2/DDX58/SRC/BIRC3/BIRC2/SPHK1/DHX58/ORM2/STAT1/IRF7/ADORA2B/GBP5/CD58/TICAM1/MALT1/PDE4D/IRF1/FLOT1/SEMA7A/ADAM8/IFNG/MBP/FURIN/EBI3/STAT3/SELENOK/PANX1/EIF2AK2/IFI16/LTA/MCOLN2/AGPAT2/FZD5/XBP1/ORM1/MYD88/IL20RB/GAPDH/TGFB1/PSEN…
GO_CELLULAR_RESPONSE_TO_MOLECULE_OF_BACTERIAL_ORIGIN	GO_CELLULAR_RESPONSE_TO_MOLECULE_OF_BACTERIAL_ORIGIN	171	0.747341	2.13262	3.81352e-12	1.27235e-09	1.00155e-09	1338	tags=30%, list=9%, signal=28%	3552/3553/2921/6348/29126/2920/3576/2919/3656/4283/129607/6347/671/1511/654/3383/114548/941/1053/4790/5142/7124/3586/7035/84868/6714/22904/7133/7128/51510/79155/558/80149/148022/10892/5144/1604/5467/79577/9516/55829/4792/7855/7494/25/4615/7431/7040/85363/7474/27250	IL1A/IL1B/CXCL3/CCL3/CD274/CXCL2/CXCL8/CXCL1/IRAK2/CXCL9/CMPK2/CCL2/BPI/CTSG/BMP6/ICAM1/NLRP3/CD80/CEBPE/NFKB1/PDE4B/TNF/IL10/TFPI/HAVCR2/SRC/SBNO2/TNFRSF1B/TNFAIP3/CHMP5/TNIP2/AXL/ZC3H12A/TICAM1/MALT1/PDE4D/CD55/PPARD/CDC73/LITAF/SELENOS/NFKBIA/FZD5/XBP1/ABL1/MYD88/VIM/TGFB1/TRIM5/WNT5A/PDCD4
GO_RESPONSE_TO_INTERLEUKIN_1	GO_RESPONSE_TO_INTERLEUKIN_1	168	0.753394	2.14726	4.88414e-12	1.52092e-09	1.19721e-09	611	tags=16%, list=4%, signal=16%	6364/3552/3553/6355/414062/3557/6348/6351/6354/3576/3656/6367/6347/3554/1906/3383/8808/4790/7035/6714/1326/2634/79155/80149/2635/10010/8372	CCL20/IL1A/IL1B/CCL8/CCL3L3/IL1RN/CCL3/CCL4/CCL7/CXCL8/IRAK2/CCL22/CCL2/IL1R1/EDN1/ICAM1/IL1RL2/NFKB1/TFPI/SRC/MAP3K8/GBP2/TNIP2/ZC3H12A/GBP3/TANK/HYAL3
GO_RESPONSE_TO_TUMOR_NECROSIS_FACTOR	GO_RESPONSE_TO_TUMOR_NECROSIS_FACTOR	255	0.69276	2.03044	5.47579e-12	1.59859e-09	1.25835e-09	925	tags=18%, list=6%, signal=17%	6364/6355/5743/414062/6348/6351/6354/3576/3604/6367/6347/7293/970/1906/7185/3383/7057/4790/7124/8740/4780/1687/330/329/355/8877/7133/2643/6772/7128/2634/8784/944/965/80149/2635/10010/8372/7187/117584/836/3987/5716/9966/84888	CCL20/CCL8/PTGS2/CCL3L3/CCL3/CCL4/CCL7/CXCL8/TNFRSF9/CCL22/CCL2/TNFRSF4/CD70/EDN1/TRAF1/ICAM1/THBS1/NFKB1/TNF/TNFSF14/NFE2L2/GSDME/BIRC3/BIRC2/FAS/SPHK1/TNFRSF1B/GCH1/STAT1/TNFAIP3/GBP2/TNFRSF18/TNFSF8/CD58/ZC3H12A/GBP3/TANK/HYAL3/TRAF3/RFFL/CASP3/LIMS1/PSMD10/TNFSF15/SPPL2A
GO_POSITIVE_REGULATION_OF_CELLULAR_COMPONENT_MOVEMENT	GO_POSITIVE_REGULATION_OF_CELLULAR_COMPONENT_MOVEMENT	459	0.617767	1.85441	1.5322e-11	4.20993e-09	3.31391e-09	1446	tags=19%, list=9%, signal=17%	6364/3553/6355/5743/7130/6348/2152/6351/4680/6354/29126/3576/54453/5031/6648/8013/3642/3554/51561/2321/1906/9732/1991/3383/7057/6615/1435/9638/285966/7124/4323/5979/8740/1236/4780/8828/5328/6714/8877/7422/57007/8784/3685/57214/9943/27161/80149/2624/5641/6386/8482/101/3458/7046/6774/4851/58515/1398/118426/8650/10512/2358/650/7042/3688/7494/2821/10769/659/25/5063/10371/9693/7040/977/324/9043/7474/8…	CCL20/IL1B/CCL8/PTGS2/TNFAIP6/CCL3/F3/CCL4/CEACAM6/CCL7/CD274/CXCL8/RIN2/P2RY6/SOD2/NR4A3/INSM1/IL1R1/IL23A/FLT1/EDN1/DOCK4/ELANE/ICAM1/THBS1/SNAI1/CSF1/NA/TCAF2/TNF/MMP14/RET/TNFSF14/CCR7/NFE2L2/NRP2/PLAU/SRC/SPHK1/VEGFA/ACKR3/TNFRSF18/ITGAV/CEMIP/OXSR1/AGO2/ZC3H12A/GATA2/LGMN/SDCBP/SEMA7A/ADAM8/IFNG/TGFBR1/STAT3/NOTCH1/SELENOK/CRK/BORCS5/NUMB/SEMA3C/FPR2/BMP2/TGFB2/ITGB1/XBP1/GPI/PLK2/BMPR2/ABL…
GO_RESPONSE_TO_VIRUS	GO_RESPONSE_TO_VIRUS	277	0.673854	1.98328	2.14526e-11	5.56696e-09	4.38211e-09	924	tags=20%, list=6%, signal=19%	3553/6355/3433/3437/6351/3559/8638/9636/4283/24138/6367/51561/64135/664/114548/7124/4599/7098/64108/4600/23586/1687/6714/330/329/5359/51251/151636/79132/10561/6772/7128/3665/10758/54541/5371/80149/148022/2635/3659/8372/7187/3460/83666/6036/3669/3458/58515/55337/665/4939/5610/3428/10379/103/51191	IL1B/CCL8/IFIT2/IFIT3/CCL4/IL2RA/OASL/ISG15/CXCL9/IFIT5/CCL22/IL23A/IFIH1/BNIP3/NLRP3/TNF/MX1/TLR3/RTP4/MX2/DDX58/GSDME/SRC/BIRC3/BIRC2/PLSCR1/NT5C3A/DTX3L/DHX58/IFI44/STAT1/TNFAIP3/IRF7/TRAF3IP2/DDIT4/PML/ZC3H12A/TICAM1/GBP3/IRF1/HYAL3/TRAF3/IFNGR2/PARP9/RNASE2/ISG20/IFNG/SELENOK/SHFL/BNIP3L/OAS2/EIF2AK2/IFI16/IRF9/ADAR/HERC5
GO_REGULATION_OF_LEUKOCYTE_MIGRATION	GO_REGULATION_OF_LEUKOCYTE_MIGRATION	170	0.727419	2.07502	7.52693e-11	1.85044e-08	1.4566e-08	791	tags=17%, list=5%, signal=16%	6364/6355/6348/6351/6354/3576/26585/6347/3554/51561/1906/1991/3383/7057/1435/7124/4323/2833/8740/1236/7422/84830/8784/9943/4681/5641/101/58515/1398	CCL20/CCL8/CCL3/CCL4/CCL7/CXCL8/GREM1/CCL2/IL1R1/IL23A/EDN1/ELANE/ICAM1/THBS1/CSF1/TNF/MMP14/CXCR3/TNFSF14/CCR7/VEGFA/ADTRP/TNFRSF18/OXSR1/NA/LGMN/ADAM8/SELENOK/CRK
GO_CELLULAR_RESPONSE_TO_BIOTIC_STIMULUS	GO_CELLULAR_RESPONSE_TO_BIOTIC_STIMULUS	195	0.711351	2.04984	8.67114e-11	2.02514e-08	1.59412e-08	1338	tags=27%, list=9%, signal=25%	3552/3553/2921/6348/29126/2920/3576/2919/3656/4283/129607/6347/671/1511/654/3383/114548/941/1053/4790/5142/7124/3586/7035/84868/6714/22904/7133/7128/51510/79155/558/80149/148022/10892/5144/1604/57003/5467/79577/9516/55829/4792/7855/7494/25/4615/7431/7040/85363/7474/27250	IL1A/IL1B/CXCL3/CCL3/CD274/CXCL2/CXCL8/CXCL1/IRAK2/CXCL9/CMPK2/CCL2/BPI/CTSG/BMP6/ICAM1/NLRP3/CD80/CEBPE/NFKB1/PDE4B/TNF/IL10/TFPI/HAVCR2/SRC/SBNO2/TNFRSF1B/TNFAIP3/CHMP5/TNIP2/AXL/ZC3H12A/TICAM1/MALT1/PDE4D/CD55/CCDC47/PPARD/CDC73/LITAF/SELENOS/NFKBIA/FZD5/XBP1/ABL1/MYD88/VIM/TGFB1/TRIM5/WNT5A/PDCD4
GO_BLOOD_VESSEL_MORPHOGENESIS	GO_BLOOD_VESSEL_MORPHOGENESIS	475	0.599486	1.80125	1.73909e-10	3.86823e-08	3.04493e-08	1912	tags=23%, list=12%, signal=21%	3552/3553/3696/5743/9464/2152/3576/54453/26585/2069/4327/718/10203/6347/51129/2321/1906/7490/356/7057/7124/4323/7098/2833/441478/3586/4780/8828/639/8877/79805/9047/3099/7422/84830/6772/7128/57007/6303/3685/5230/27161/79924/5371/80149/2624/22846/79602/101/116844/54583/7046/6774/4851/57178/7042/2004/9444/3688/7855/7494/10352/10769/5906/659/25/3949/575/26051/4734/10516/4763/9693/7040/5468/4853/28514…	IL1A/IL1B/ITGB8/PTGS2/HAND2/F3/CXCL8/RIN2/GREM1/EREG/MMP19/C3/CALCRL/CCL2/ANGPTL4/FLT1/EDN1/WT1/FASLG/THBS1/TNF/MMP14/TLR3/CXCR3/NRARP/IL10/NFE2L2/NRP2/PRDM1/SPHK1/VASH2/SH2D2A/HK2/VEGFA/ADTRP/STAT1/TNFAIP3/ACKR3/SAT1/ITGAV/PGK1/AGO2/ADM2/PML/ZC3H12A/GATA2/VASH1/ADIPOR2/ADAM8/LRG1/EGLN1/TGFBR1/STAT3/NOTCH1/ZMIZ1/TGFB2/ELK3/QKI/ITGB1/FZD5/XBP1/WARS2/PLK2/RAP1A/BMPR2/ABL1/LDLR/ADGRB1/PPP1R16B/NEDD4…
GO_CELLULAR_RESPONSE_TO_LIPID	GO_CELLULAR_RESPONSE_TO_LIPID	450	0.599659	1.79894	2.06283e-10	4.37977e-08	3.4476e-08	1207	tags=17%, list=8%, signal=16%	3552/3553/2706/2921/6348/29126/2920/3576/2919/3656/5031/4283/8013/56937/129607/6347/671/1906/1511/654/3383/114548/941/6752/1053/4790/5142/7124/5979/8854/3586/7035/84868/3638/6714/22904/7133/84830/7128/2100/4864/51141/54541/8805/51510/490/79155/558/80149/148022/10892/5144/1604/27/5467/54331/29966/2908/8837/7525/11057/79577/9516/57178/3157/2235/55829/4792/7494/25/3949/4615/7431/4734/7040/8886	IL1A/IL1B/GJB2/CXCL3/CCL3/CD274/CXCL2/CXCL8/CXCL1/IRAK2/P2RY6/CXCL9/NR4A3/PMEPA1/CMPK2/CCL2/BPI/EDN1/CTSG/BMP6/ICAM1/NLRP3/CD80/SSTR2/CEBPE/NFKB1/PDE4B/TNF/RET/ALDH1A2/IL10/TFPI/HAVCR2/INSIG1/SRC/SBNO2/TNFRSF1B/ADTRP/TNFAIP3/ESR2/NPC1/INSIG2/DDIT4/TRIM24/CHMP5/ATP2B1/TNIP2/AXL/ZC3H12A/TICAM1/MALT1/PDE4D/CD55/ABL2/PPARD/GNG2/STRN3/NR3C1/CFLAR/YES1/ABHD2/CDC73/LITAF/ZMIZ1/HMGCS1/FECH/SELENOS/NFKBIA…
GO_POSITIVE_REGULATION_OF_MAPK_CASCADE	GO_POSITIVE_REGULATION_OF_MAPK_CASCADE	419	0.611414	1.83064	2.51242e-10	5.1024e-08	4.01642e-08	1403	tags=20%, list=9%, signal=19%	6364/3553/6355/414062/9464/6348/3589/6351/6354/23566/3656/5031/6367/6347/2321/1906/7185/1991/3383/7057/7124/7098/5979/1236/8412/84868/1687/151/6714/5291/8877/960/1880/7422/1326/57007/136/3976/4914/80149/51776/6386/7187/8482/9839/101/9175/8837/7046/4851/1398/5770/2043/5610/2081/23118/2358/2889/650/3487/7042/257397/8682/7855/5906/25/5063/10371/9693/7040/9043/6416/4853/23533/5908/5663/85363/7474/114…	CCL20/IL1B/CCL8/CCL3L3/HAND2/CCL3/IL11/CCL4/CCL7/LPAR3/IRAK2/P2RY6/CCL22/CCL2/FLT1/EDN1/TRAF1/ELANE/ICAM1/THBS1/TNF/TLR3/RET/CCR7/NA/HAVCR2/GSDME/ADRA2B/SRC/PIK3CB/SPHK1/CD44/GPR183/VEGFA/MAP3K8/ACKR3/ADORA2B/LIF/NTRK1/ZC3H12A/MAP3K20/SDCBP/TRAF3/SEMA7A/ZEB2/ADAM8/MAP3K13/CFLAR/TGFBR1/NOTCH1/CRK/PTPN1/EPHA4/EIF2AK2/ERN1/TAB2/FPR2/RAPGEF1/BMP2/IGFBP4/TGFB2/TAB3/PEA15/FZD5/RAP1A/ABL1/PAK3/SEMA3A/RA…
GO_MONONUCLEAR_CELL_MIGRATION	GO_MONONUCLEAR_CELL_MIGRATION	65	0.841192	2.16636	3.48373e-10	6.78021e-08	5.33714e-08	606	tags=23%, list=4%, signal=22%	6364/6355/414062/6348/6351/6354/26585/6367/6347/2321/7057/1435/7124/4681/5641	CCL20/CCL8/CCL3L3/CCL3/CCL4/CCL7/GREM1/CCL22/CCL2/FLT1/THBS1/CSF1/TNF/NA/LGMN
GO_POSITIVE_REGULATION_OF_LEUKOCYTE_MIGRATION	GO_POSITIVE_REGULATION_OF_LEUKOCYTE_MIGRATION	113	0.773718	2.12663	6.76048e-10	1.26313e-07	9.94289e-08	772	tags=20%, list=5%, signal=19%	6364/6355/6348/6351/6354/3576/3554/51561/1906/1991/3383/7057/1435/7124/4323/8740/1236/7422/8784/9943/5641/101/58515	CCL20/CCL8/CCL3/CCL4/CCL7/CXCL8/IL1R1/IL23A/EDN1/ELANE/ICAM1/THBS1/CSF1/TNF/MMP14/TNFSF14/CCR7/VEGFA/TNFRSF18/OXSR1/LGMN/ADAM8/SELENOK
GO_RESPONSE_TO_INTERFERON_GAMMA	GO_RESPONSE_TO_INTERFERON_GAMMA	164	0.722701	2.05581	7.90552e-10	1.4059e-07	1.10668e-07	1313	tags=26%, list=9%, signal=24%	6364/6355/414062/6348/6351/6354/8638/6367/6347/1906/356/3383/8651/7098/6737/960/2643/6772/115361/3665/2634/115362/965/8942/5371/2635/3659/3460/83666/3458/9111/55337/4939/10379/7706/9021/7431/2597/5468/3105/85363/7474	CCL20/CCL8/CCL3L3/CCL3/CCL4/CCL7/OASL/CCL22/CCL2/EDN1/FASLG/ICAM1/SOCS1/TLR3/TRIM21/CD44/GCH1/STAT1/GBP4/IRF7/GBP2/GBP5/CD58/KYNU/PML/GBP3/IRF1/IFNGR2/PARP9/IFNG/NMI/SHFL/OAS2/IRF9/TRIM25/SOCS3/VIM/GAPDH/PPARG/HLA-A/TRIM5/WNT5A
GO_DEFENSE_RESPONSE_TO_VIRUS	GO_DEFENSE_RESPONSE_TO_VIRUS	203	0.69503	2.00823	8.12661e-10	1.4059e-07	1.10668e-07	924	tags=23%, list=6%, signal=22%	3553/3433/3437/3559/8638/9636/4283/24138/51561/64135/664/114548/4599/7098/64108/4600/23586/330/329/5359/51251/151636/79132/6772/7128/3665/10758/54541/5371/80149/148022/2635/3659/7187/83666/6036/3669/3458/58515/55337/665/4939/5610/3428/10379/103/51191	IL1B/IFIT2/IFIT3/IL2RA/OASL/ISG15/CXCL9/IFIT5/IL23A/IFIH1/BNIP3/NLRP3/MX1/TLR3/RTP4/MX2/DDX58/BIRC3/BIRC2/PLSCR1/NT5C3A/DTX3L/DHX58/STAT1/TNFAIP3/IRF7/TRAF3IP2/DDIT4/PML/ZC3H12A/TICAM1/GBP3/IRF1/TRAF3/PARP9/RNASE2/ISG20/IFNG/SELENOK/SHFL/BNIP3L/OAS2/EIF2AK2/IFI16/IRF9/ADAR/HERC5
GO_REGULATION_OF_INFLAMMATORY_RESPONSE	GO_REGULATION_OF_INFLAMMATORY_RESPONSE	278	0.648411	1.9088	8.61463e-10	1.43711e-07	1.13124e-07	1694	tags=24%, list=11%, signal=22%	3553/2853/5743/7130/6348/3559/718/10203/3554/51561/8530/11274/9173/1991/8808/114548/4790/7124/7098/1236/10318/3586/284207/330/329/8877/22904/7133/7128/136/115362/80149/148022/5467/8482/101/11343/3458/6774/64332/118788/2358/255877/9021/4049/6845/55829/4792/3949/4615/53833/4363/5468/837/7474/9870/27250/7941/56670/5598/7114/23476/4779/135/5008/388581/6279	IL1B/GPR31/PTGS2/TNFAIP6/CCL3/IL2RA/C3/CALCRL/IL1R1/IL23A/CST7/USP18/IL1RL1/ELANE/IL1RL2/NLRP3/NFKB1/TNF/TLR3/CCR7/TNIP1/IL10/METRNL/BIRC3/BIRC2/SPHK1/SBNO2/TNFRSF1B/TNFAIP3/ADORA2B/GBP5/ZC3H12A/TICAM1/PPARD/SEMA7A/ADAM8/MGLL/IFNG/STAT3/NFKBIZ/PIK3AP1/FPR2/BCL6B/SOCS3/LTA/VAMP7/SELENOS/NFKBIA/LDLR/MYD88/IL20RB/ABCC1/PPARG/CASP4/WNT5A/AREL1/PDCD4/PLA2G7/SUCNR1/MAPK7/TMSB4X/BRD4/NFE2L1/ADORA2A/OSM/…
GO_MONOCYTE_CHEMOTAXIS	GO_MONOCYTE_CHEMOTAXIS	41	0.882347	2.13014	2.38838e-09	3.84694e-07	3.02817e-07	606	tags=29%, list=4%, signal=28%	6364/6355/414062/6348/6351/6354/26585/6367/6347/2321/4681/5641	CCL20/CCL8/CCL3L3/CCL3/CCL4/CCL7/GREM1/CCL22/CCL2/FLT1/NA/LGMN
GO_REGULATION_OF_CELL_CELL_ADHESION	GO_REGULATION_OF_CELL_CELL_ADHESION	363	0.609879	1.81816	2.74635e-09	4.27607e-07	3.36596e-07	1525	tags=20%, list=10%, signal=19%	3552/3553/3557/4680/3559/29126/8013/6347/384/51561/970/7471/654/5329/1991/3383/8808/114548/941/8651/7124/8740/1236/441478/3586/6385/84868/6714/960/7422/84830/29851/1326/80149/10892/6541/3659/1604/10211/101/7037/10725/3458/4155/4860/7525/10148/836/4851/58515/64332/57045/57178/650/50848/7494/25/54900/54542/5063/53833/7040/8546/64844/3105/7474/8772/114897/10125/3654/3902/9308/5598/5133	IL1A/IL1B/IL1RN/CEACAM6/IL2RA/CD274/NR4A3/CCL2/ARG2/IL23A/CD70/WNT1/BMP6/PLAUR/ELANE/ICAM1/IL1RL2/NLRP3/CD80/SOCS1/TNF/TNFSF14/CCR7/NRARP/IL10/SDC4/HAVCR2/SRC/CD44/VEGFA/ADTRP/ICOS/MAP3K8/ZC3H12A/MALT1/SLC7A1/IRF1/CD55/FLOT1/ADAM8/TFRC/NFAT5/IFNG/MBP/PNP/YES1/EBI3/CASP3/NOTCH1/SELENOK/NFKBIZ/TWSG1/ZMIZ1/BMP2/F11R/XBP1/ABL1/LAX1/RC3H2/PAK3/IL20RB/TGFB1/AP3B1/MARCHF7/HLA-A/WNT5A/FADD/C1QTNF1/RASGRP…
GO_LYMPHOCYTE_MIGRATION	GO_LYMPHOCYTE_MIGRATION	89	0.78771	2.10972	3.1897e-09	4.80616e-07	3.78323e-07	791	tags=24%, list=5%, signal=23%	6364/6355/414062/6348/6351/6354/6367/6347/3383/2838/5979/2833/8740/1236/1880/84830/9943/124976/101/58515/1398	CCL20/CCL8/CCL3L3/CCL3/CCL4/CCL7/CCL22/CCL2/ICAM1/GPR15/RET/CXCR3/TNFSF14/CCR7/GPR183/ADTRP/OXSR1/SPNS2/ADAM8/SELENOK/CRK
GO_POSITIVE_REGULATION_OF_VASCULATURE_DEVELOPMENT	GO_POSITIVE_REGULATION_OF_VASCULATURE_DEVELOPMENT	152	0.726995	2.05542	4.0206e-09	5.86882e-07	4.61972e-07	1313	tags=25%, list=9%, signal=23%	3552/3553/3696/5743/2152/3576/54453/26585/718/6648/51129/2321/7057/7098/3586/4780/8877/79805/3099/7422/1491/27161/79924/80149/2624/116844/8837/6774/4851/3688/7494/10769/5906/25/26051/9693/28514/7474	IL1A/IL1B/ITGB8/PTGS2/F3/CXCL8/RIN2/GREM1/C3/SOD2/ANGPTL4/FLT1/THBS1/TLR3/IL10/NFE2L2/SPHK1/VASH2/HK2/VEGFA/CTH/AGO2/ADM2/ZC3H12A/GATA2/LRG1/CFLAR/STAT3/NOTCH1/ITGB1/XBP1/PLK2/RAP1A/ABL1/PPP1R16B/RAPGEF2/DLL1/WNT5A
GO_POSITIVE_REGULATION_OF_CELL_ADHESION	GO_POSITIVE_REGULATION_OF_CELL_ADHESION	357	0.614305	1.83021	4.33484e-09	6.13577e-07	4.82986e-07	826	tags=14%, list=5%, signal=14%	3552/3553/4680/3559/29126/54453/8013/6347/51561/970/10562/5329/1991/3383/8808/114548/941/8651/1435/7124/5979/8740/1236/3586/6385/84868/6714/4814/960/7422/29851/1326/8784/3685/3976/10892/6541/1604/10211/101/7037/10725/3458/5034/4860/7525/10148/58515/64332/1398/3987	IL1A/IL1B/CEACAM6/IL2RA/CD274/RIN2/NR4A3/CCL2/IL23A/CD70/OLFM4/PLAUR/ELANE/ICAM1/IL1RL2/NLRP3/CD80/SOCS1/CSF1/TNF/RET/TNFSF14/CCR7/IL10/SDC4/HAVCR2/SRC/NINJ1/CD44/VEGFA/ICOS/MAP3K8/TNFRSF18/ITGAV/LIF/MALT1/SLC7A1/CD55/FLOT1/ADAM8/TFRC/NFAT5/IFNG/P4HB/PNP/YES1/EBI3/SELENOK/NFKBIZ/CRK/LIMS1
GO_POSITIVE_REGULATION_OF_CELL_CELL_ADHESION	GO_POSITIVE_REGULATION_OF_CELL_CELL_ADHESION	237	0.656752	1.91667	5.11328e-09	7.02475e-07	5.52963e-07	783	tags=16%, list=5%, signal=15%	3552/3553/4680/3559/29126/8013/6347/51561/970/5329/1991/3383/8808/114548/941/8651/7124/8740/1236/3586/84868/6714/960/29851/1326/10892/6541/1604/10211/101/7037/10725/3458/4860/7525/10148/58515/64332	IL1A/IL1B/CEACAM6/IL2RA/CD274/NR4A3/CCL2/IL23A/CD70/PLAUR/ELANE/ICAM1/IL1RL2/NLRP3/CD80/SOCS1/TNF/TNFSF14/CCR7/IL10/HAVCR2/SRC/CD44/ICOS/MAP3K8/MALT1/SLC7A1/CD55/FLOT1/ADAM8/TFRC/NFAT5/IFNG/PNP/YES1/EBI3/SELENOK/NFKBIZ
GO_POSITIVE_REGULATION_OF_CELL_ACTIVATION	GO_POSITIVE_REGULATION_OF_CELL_ACTIVATION	306	0.631767	1.87	9.21487e-09	1.22979e-06	9.68047e-07	1359	tags=18%, list=9%, signal=17%	3552/3553/6348/64109/3559/29126/8013/6347/7293/51561/970/9173/8808/114548/941/7057/8651/4323/8740/1236/3586/84868/6714/1880/29851/1326/136/79155/558/2624/148022/10892/6541/1604/101/7037/3458/4860/7525/10148/58515/64332/57178/50848/6845/7494/5063/4773/7040/8546/3105/55183/7474/8772/10125	IL1A/IL1B/CCL3/CRLF2/IL2RA/CD274/NR4A3/CCL2/TNFRSF4/IL23A/CD70/IL1RL1/IL1RL2/NLRP3/CD80/THBS1/SOCS1/MMP14/TNFSF14/CCR7/IL10/HAVCR2/SRC/GPR183/ICOS/MAP3K8/ADORA2B/TNIP2/AXL/GATA2/TICAM1/MALT1/SLC7A1/CD55/ADAM8/TFRC/IFNG/PNP/YES1/EBI3/SELENOK/NFKBIZ/ZMIZ1/F11R/VAMP7/XBP1/PAK3/NFATC2/TGFB1/AP3B1/HLA-A/RIF1/WNT5A/FADD/RASGRP1
GO_ERK1_AND_ERK2_CASCADE	GO_ERK1_AND_ERK2_CASCADE	226	0.664525	1.93349	1.54753e-08	2.00792e-06	1.58056e-06	1277	tags=18%, list=8%, signal=17%	6364/3553/6355/414062/9464/6348/6351/6354/5031/6367/6347/1846/27330/3383/7124/1236/10318/84868/6714/960/1880/57007/3685/3976/4914/200734/551/8482/8837/4851/5770/2358/2889/650/5906/25/57053/9693/7040/4853/5908	CCL20/IL1B/CCL8/CCL3L3/HAND2/CCL3/CCL4/CCL7/P2RY6/CCL22/CCL2/DUSP4/RPS6KA6/ICAM1/TNF/CCR7/TNIP1/HAVCR2/SRC/CD44/GPR183/ACKR3/ITGAV/LIF/NTRK1/SPRED2/AVP/SEMA7A/CFLAR/NOTCH1/PTPN1/FPR2/RAPGEF1/BMP2/RAP1A/ABL1/CHRNA10/RAPGEF2/TGFB1/NOTCH2/RAP1B
GO_LEUKOCYTE_CELL_CELL_ADHESION	GO_LEUKOCYTE_CELL_CELL_ADHESION	311	0.621046	1.83952	1.79615e-08	2.26752e-06	1.78491e-06	1466	tags=20%, list=10%, signal=18%	3552/3553/3559/29126/4973/8013/6347/384/51561/970/1991/3383/8808/114548/941/8651/64116/7124/8740/1236/441478/10318/3586/6385/84868/6714/960/84830/29851/1326/80149/10892/6541/3659/1604/101/7037/10725/3458/4860/7525/10148/836/58515/64332/57045/57178/50848/3688/7494/54900/54542/5063/53833/8546/64844/3105/8772/10125/3654/3902/9308	IL1A/IL1B/IL2RA/CD274/OLR1/NR4A3/CCL2/ARG2/IL23A/CD70/ELANE/ICAM1/IL1RL2/NLRP3/CD80/SOCS1/SLC39A8/TNF/TNFSF14/CCR7/NRARP/TNIP1/IL10/SDC4/HAVCR2/SRC/CD44/ADTRP/ICOS/MAP3K8/ZC3H12A/MALT1/SLC7A1/IRF1/CD55/ADAM8/TFRC/NFAT5/IFNG/PNP/YES1/EBI3/CASP3/SELENOK/NFKBIZ/TWSG1/ZMIZ1/F11R/ITGB1/XBP1/LAX1/RC3H2/PAK3/IL20RB/AP3B1/MARCHF7/HLA-A/FADD/RASGRP1/IRAK1/LAG3/CD83
GO_REGULATION_OF_VASCULATURE_DEVELOPMENT	GO_REGULATION_OF_VASCULATURE_DEVELOPMENT	265	0.641689	1.88449	1.90474e-08	2.34133e-06	1.84301e-06	1338	tags=21%, list=9%, signal=20%	3552/3553/3696/5743/2152/3576/54453/26585/718/6648/51129/2321/7490/356/7057/7124/7098/3586/4780/8877/79805/3099/7422/6772/7128/1491/5230/27161/79924/5371/80149/2624/22846/116844/8837/54583/6774/4851/7042/3688/7494/10769/5906/25/575/26051/10516/4763/9693/4772/4773/5468/28514/7474/7453/27250	IL1A/IL1B/ITGB8/PTGS2/F3/CXCL8/RIN2/GREM1/C3/SOD2/ANGPTL4/FLT1/WT1/FASLG/THBS1/TNF/TLR3/IL10/NFE2L2/SPHK1/VASH2/HK2/VEGFA/STAT1/TNFAIP3/CTH/PGK1/AGO2/ADM2/PML/ZC3H12A/GATA2/VASH1/LRG1/CFLAR/EGLN1/STAT3/NOTCH1/TGFB2/ITGB1/XBP1/PLK2/RAP1A/ABL1/ADGRB1/PPP1R16B/FBLN5/NF1/RAPGEF2/NFATC1/NFATC2/PPARG/DLL1/WNT5A/WARS1/PDCD4
GO_POSITIVE_REGULATION_OF_ERK1_AND_ERK2_CASCADE	GO_POSITIVE_REGULATION_OF_ERK1_AND_ERK2_CASCADE	140	0.713032	2.00134	2.02904e-08	2.43017e-06	1.91294e-06	1277	tags=22%, list=8%, signal=20%	6364/6355/414062/9464/6348/6351/6354/5031/6367/6347/3383/7124/1236/84868/6714/960/1880/57007/4914/8482/8837/4851/2358/2889/650/5906/25/9693/7040/4853/5908	CCL20/CCL8/CCL3L3/HAND2/CCL3/CCL4/CCL7/P2RY6/CCL22/CCL2/ICAM1/TNF/CCR7/HAVCR2/SRC/CD44/GPR183/ACKR3/NTRK1/SEMA7A/CFLAR/NOTCH1/FPR2/RAPGEF1/BMP2/RAP1A/ABL1/RAPGEF2/TGFB1/NOTCH2/RAP1B
GO_LYMPHOCYTE_CHEMOTAXIS	GO_LYMPHOCYTE_CHEMOTAXIS	39	0.879788	2.10763	3.08701e-08	3.60485e-06	2.83761e-06	656	tags=33%, list=4%, signal=32%	6364/6355/414062/6348/6351/6354/6367/6347/2833/8740/1880/9943/101	CCL20/CCL8/CCL3L3/CCL3/CCL4/CCL7/CCL22/CCL2/CXCR3/TNFSF14/GPR183/OXSR1/ADAM8
GO_HUMORAL_IMMUNE_RESPONSE	GO_HUMORAL_IMMUNE_RESPONSE	146	0.700841	1.97403	5.53356e-08	6.30421e-06	4.96245e-06	753	tags=17%, list=5%, signal=16%	3553/2921/6590/629/2920/3576/2919/6037/718/4283/6347/671/1511/1991/7124/1236/1880/820/10758/5657/1604/124976/3458/10148/4851	IL1B/CXCL3/SLPI/CFB/CXCL2/CXCL8/CXCL1/RNASE3/C3/CXCL9/CCL2/BPI/CTSG/ELANE/TNF/CCR7/GPR183/CAMP/TRAF3IP2/PRTN3/CD55/SPNS2/IFNG/EBI3/NOTCH1
GO_ANTIMICROBIAL_HUMORAL_RESPONSE	GO_ANTIMICROBIAL_HUMORAL_RESPONSE	57	0.822139	2.08068	5.9541e-08	6.62181e-06	5.21245e-06	488	tags=21%, list=3%, signal=20%	2921/6590/2920/3576/2919/6037/4283/671/1511/1991/820/5657	CXCL3/SLPI/CXCL2/CXCL8/CXCL1/RNASE3/CXCL9/BPI/CTSG/ELANE/CAMP/PRTN3
GO_REGULATION_OF_CELL_ACTIVATION	GO_REGULATION_OF_CELL_ACTIVATION	494	0.56161	1.68914	1.04633e-07	1.13661e-05	8.94699e-06	1359	tags=17%, list=9%, signal=16%	3552/3553/6348/64109/3559/29126/8013/6347/671/384/7293/51561/970/8530/9173/8808/114548/941/7057/8651/4323/8740/1236/441478/3586/6385/84868/64092/6714/639/8877/7133/5359/1880/29851/7128/1326/8784/136/944/79155/558/80149/2624/148022/10892/6541/3659/1604/101/7037/3458/4860/7525/10148/836/58515/64332/57045/7107/2729/30817/6830/57178/6935/50848/6845/7494/25/3949/54900/54542/5063/53833/4773/7040/8546/6…	IL1A/IL1B/CCL3/CRLF2/IL2RA/CD274/NR4A3/CCL2/BPI/ARG2/TNFRSF4/IL23A/CD70/CST7/IL1RL1/IL1RL2/NLRP3/CD80/THBS1/SOCS1/MMP14/TNFSF14/CCR7/NRARP/IL10/SDC4/HAVCR2/NA/SRC/PRDM1/SPHK1/TNFRSF1B/PLSCR1/GPR183/ICOS/TNFAIP3/MAP3K8/TNFRSF18/ADORA2B/TNFSF8/TNIP2/AXL/ZC3H12A/GATA2/TICAM1/MALT1/SLC7A1/IRF1/CD55/ADAM8/TFRC/IFNG/PNP/YES1/EBI3/CASP3/SELENOK/NFKBIZ/TWSG1/GPR137B/GCLC/ADGRE2/SUPT6H/ZMIZ1/ZEB1/F11R/VAM…
GO_T_CELL_ACTIVATION	GO_T_CELL_ACTIVATION	421	0.574566	1.7205	1.23686e-07	1.31304e-05	1.03358e-05	1809	tags=21%, list=12%, signal=19%	3552/3553/3559/29126/6347/384/7293/51561/970/7471/3383/1514/8808/114548/941/8651/8740/1236/441478/10538/3586/6385/84868/84174/6714/639/7133/960/1880/29851/1326/8784/3714/944/80149/10892/6541/3659/1604/101/7037/3458/4860/7525/10148/836/64343/6774/58515/64332/57045/3955/57178/6935/5971/7855/7494/25/54900/54542/5063/53833/4734/4773/977/8546/64844/5663/3105/8772/10125/3702/3902/9308/5873/3140/5133/16…	IL1A/IL1B/IL2RA/CD274/CCL2/ARG2/TNFRSF4/IL23A/CD70/WNT1/ICAM1/CTSL/IL1RL2/NLRP3/CD80/SOCS1/TNFSF14/CCR7/NRARP/BATF/IL10/SDC4/HAVCR2/SLA2/SRC/PRDM1/TNFRSF1B/CD44/GPR183/ICOS/MAP3K8/TNFRSF18/JAG2/TNFSF8/ZC3H12A/MALT1/SLC7A1/IRF1/CD55/ADAM8/TFRC/IFNG/PNP/YES1/EBI3/CASP3/AZI2/STAT3/SELENOK/NFKBIZ/TWSG1/LFNG/ZMIZ1/ZEB1/RELB/FZD5/XBP1/ABL1/LAX1/RC3H2/PAK3/IL20RB/NEDD4/NFATC2/CD151/AP3B1/MARCHF7/PSEN1/H…
GO_NEGATIVE_REGULATION_OF_VIRAL_PROCESS	GO_NEGATIVE_REGULATION_OF_VIRAL_PROCESS	85	0.768242	2.04543	1.54761e-07	1.57336e-05	1.2385e-05	1007	tags=26%, list=7%, signal=24%	6355/6590/6348/6351/8638/9636/24138/7124/4599/10318/6737/5359/6772/5806/5371/80149/3669/55337/4939/5610/3428/7706	CCL8/SLPI/CCL3/CCL4/OASL/ISG15/IFIT5/TNF/MX1/TNIP1/TRIM21/PLSCR1/STAT1/PTX3/PML/ZC3H12A/ISG20/SHFL/OAS2/EIF2AK2/IFI16/TRIM25
GO_REGULATION_OF_SYMBIOTIC_PROCESS	GO_REGULATION_OF_SYMBIOTIC_PROCESS	199	0.656561	1.89447	1.54945e-07	1.57336e-05	1.2385e-05	1188	tags=19%, list=8%, signal=17%	6355/6590/6348/6351/8638/3576/27074/9636/24138/7124/4599/10318/6737/5359/6772/9150/3685/5806/5371/80149/3669/5034/4851/55337/7251/4939/5610/3428/103/2959/2040/7706/6780/79720/26986/128866/2597	CCL8/SLPI/CCL3/CCL4/OASL/CXCL8/LAMP3/ISG15/IFIT5/TNF/MX1/TNIP1/TRIM21/PLSCR1/STAT1/CTDP1/ITGAV/PTX3/PML/ZC3H12A/ISG20/P4HB/NOTCH1/SHFL/TSG101/OAS2/EIF2AK2/IFI16/ADAR/GTF2B/STOM/TRIM25/STAU1/VPS37B/PABPC1/CHMP4B/GAPDH
GO_DEFENSE_RESPONSE_TO_BACTERIUM	GO_DEFENSE_RESPONSE_TO_BACTERIUM	147	0.693295	1.95391	1.58807e-07	1.57827e-05	1.24235e-05	534	tags=14%, list=3%, signal=14%	6364/6590/8288/6037/9636/671/384/51561/1511/1991/114548/1053/7124/7098/3586/84868/115361/2634/944/820/10133	CCL20/SLPI/EPX/RNASE3/ISG15/BPI/ARG2/IL23A/CTSG/ELANE/NLRP3/CEBPE/TNF/TLR3/IL10/HAVCR2/GBP4/GBP2/TNFSF8/CAMP/OPTN
GO_POSITIVE_REGULATION_OF_LEUKOCYTE_CELL_CELL_ADHESION	GO_POSITIVE_REGULATION_OF_LEUKOCYTE_CELL_CELL_ADHESION	208	0.658055	1.905	1.99757e-07	1.94389e-05	1.53016e-05	783	tags=16%, list=5%, signal=16%	3552/3553/3559/29126/8013/6347/51561/970/1991/3383/8808/114548/941/8651/7124/8740/1236/84868/6714/960/29851/1326/10892/6541/1604/101/7037/10725/3458/4860/7525/10148/58515/64332	IL1A/IL1B/IL2RA/CD274/NR4A3/CCL2/IL23A/CD70/ELANE/ICAM1/IL1RL2/NLRP3/CD80/SOCS1/TNF/TNFSF14/CCR7/HAVCR2/SRC/CD44/ICOS/MAP3K8/MALT1/SLC7A1/CD55/ADAM8/TFRC/NFAT5/IFNG/PNP/YES1/EBI3/SELENOK/NFKBIZ
GO_POSITIVE_REGULATION_OF_RESPONSE_TO_EXTERNAL_STIMULUS	GO_POSITIVE_REGULATION_OF_RESPONSE_TO_EXTERNAL_STIMULUS	414	0.571719	1.71106	2.57442e-07	2.45411e-05	1.93179e-05	2631	tags=29%, list=17%, signal=25%	3553/5743/6348/2152/6351/6354/3576/2069/718/51561/1906/9173/654/7057/1233/1435/4790/7124/7098/8740/1236/10318/84868/6714/5359/79132/7422/3665/136/115362/9943/4582/10133/148022/10892/5641/83666/101/3458/6774/64332/3428/5716/23118/2358/8578/4049/257397/5971/6845/4792/659/3949/4615/5063/4363/7040/85363/7474/8772/4068/81565/27250/10125/719/3093/5469/7941/3902/56670/7114/23291/5008/6279/9491/2260/5747…	IL1B/PTGS2/CCL3/F3/CCL4/CCL7/CXCL8/EREG/C3/IL23A/EDN1/IL1RL1/BMP6/THBS1/CCR4/CSF1/NFKB1/TNF/TLR3/TNFSF14/CCR7/TNIP1/HAVCR2/SRC/PLSCR1/DHX58/VEGFA/IRF7/ADORA2B/GBP5/OXSR1/MUC1/OPTN/TICAM1/MALT1/LGMN/PARP9/ADAM8/IFNG/STAT3/NFKBIZ/IFI16/PSMD10/TAB2/FPR2/SCARF1/LTA/TAB3/RELB/VAMP7/NFKBIA/BMPR2/LDLR/MYD88/PAK3/ABCC1/TGFB1/TRIM5/WNT5A/FADD/SH2D1A/NDEL1/PDCD4/RASGRP1/C3AR1/UBE2K/MED1/PLA2G7/LAG3/SUCNR1/…
GO_VITAMIN_TRANSMEMBRANE_TRANSPORT	GO_VITAMIN_TRANSMEMBRANE_TRANSPORT	12	-0.930306	-2.13158	3.69697e-07	3.45371e-05	2.71863e-05	98	tags=33%, list=1%, signal=33%	949/376497/9963/113235	SCARB1/SLC27A1/SLC23A1/SLC46A1
GO_CELLULAR_RESPONSE_TO_ORGANIC_CYCLIC_COMPOUND	GO_CELLULAR_RESPONSE_TO_ORGANIC_CYCLIC_COMPOUND	443	0.556668	1.66924	4.03162e-07	3.69249e-05	2.90659e-05	1809	tags=19%, list=12%, signal=17%	3553/2706/5743/6348/366/5031/8013/3269/56937/6347/6547/1906/7490/3383/64135/6752/4790/5142/7124/7098/3586/7035/23586/3638/6714/84830/6772/2100/4864/51141/54541/8787/8805/490/2769/80149/5144/5467/10211/54331/840/29966/2908/8837/836/6774/11057/2729/57178/3157/2889/2235/650/7184/5906/25/54464/5063/4734/9693/7040/8886/5468/5908/55151/249/610/5469/6696/2002/57817/4779/8031/2774/2773/112398/10424/476/2…	IL1B/GJB2/PTGS2/CCL3/AQP9/P2RY6/NR4A3/HRH1/PMEPA1/CCL2/SLC8A3/EDN1/WT1/ICAM1/IFIH1/SSTR2/NFKB1/PDE4B/TNF/TLR3/IL10/TFPI/DDX58/INSIG1/SRC/ADTRP/STAT1/ESR2/NPC1/INSIG2/DDIT4/RGS9/TRIM24/ATP2B1/GNA15/ZC3H12A/PDE4D/PPARD/FLOT1/GNG2/CASP7/STRN3/NR3C1/CFLAR/CASP3/STAT3/ABHD2/GCLC/ZMIZ1/HMGCS1/RAPGEF1/FECH/BMP2/HSP90B1/RAP1A/ABL1/XRN1/PAK3/NEDD4/RAPGEF2/TGFB1/DDX18/PPARG/RAP1B/TMEM38B/ALPL/HCN2/MED1/SPP…
GO_REGULATION_OF_T_CELL_ACTIVATION	GO_REGULATION_OF_T_CELL_ACTIVATION	290	0.597284	1.76268	8.15407e-07	7.32455e-05	5.76562e-05	1608	tags=21%, list=10%, signal=19%	3552/3553/3559/29126/6347/384/51561/970/8808/114548/941/8651/8740/1236/441478/3586/6385/84868/6714/639/7133/29851/1326/8784/944/80149/10892/6541/3659/1604/101/7037/3458/4860/7525/10148/836/58515/64332/57045/57178/6935/7494/25/54900/54542/5063/53833/4773/8546/64844/3105/8772/10125/3902/9308/5133/246778/135/3958	IL1A/IL1B/IL2RA/CD274/CCL2/ARG2/IL23A/CD70/IL1RL2/NLRP3/CD80/SOCS1/TNFSF14/CCR7/NRARP/IL10/SDC4/HAVCR2/SRC/PRDM1/TNFRSF1B/ICOS/MAP3K8/TNFRSF18/TNFSF8/ZC3H12A/MALT1/SLC7A1/IRF1/CD55/ADAM8/TFRC/IFNG/PNP/YES1/EBI3/CASP3/SELENOK/NFKBIZ/TWSG1/ZMIZ1/ZEB1/XBP1/ABL1/LAX1/RC3H2/PAK3/IL20RB/NFATC2/AP3B1/MARCHF7/HLA-A/FADD/RASGRP1/LAG3/CD83/PDCD1/IL27/ADORA2A/LGALS3
GO_POSITIVE_REGULATION_OF_HEMOPOIESIS	GO_POSITIVE_REGULATION_OF_HEMOPOIESIS	176	0.656077	1.87591	8.90318e-07	7.84656e-05	6.17653e-05	1466	tags=22%, list=10%, signal=20%	3552/3553/3559/9636/51561/8808/114548/941/8651/1435/7124/4323/8111/6772/3976/558/2624/10892/101/3458/4860/6774/64332/760/57178/7494/140685/7040/8546/4853/92/23774/8772/10125/54997/169200/5469/9308	IL1A/IL1B/IL2RA/ISG15/IL23A/IL1RL2/NLRP3/CD80/SOCS1/CSF1/TNF/MMP14/GPR68/STAT1/LIF/AXL/GATA2/MALT1/ADAM8/IFNG/PNP/STAT3/NFKBIZ/CA2/ZMIZ1/XBP1/ZBTB46/TGFB1/AP3B1/NOTCH2/ACVR2A/BRD1/FADD/RASGRP1/TESC/TMEM64/MED1/CD83
GO_ANTIMICROBIAL_HUMORAL_IMMUNE_RESPONSE_MEDIATED_BY_ANTIMICROBIAL_PEPTIDE	GO_ANTIMICROBIAL_HUMORAL_IMMUNE_RESPONSE_MEDIATED_BY_ANTIMICROBIAL_PEPTIDE	32	0.876647	2.03689	9.25801e-07	8.00818e-05	6.30375e-05	467	tags=25%, list=3%, signal=24%	2921/2920/3576/2919/6037/4283/1991/820	CXCL3/CXCL2/CXCL8/CXCL1/RNASE3/CXCL9/ELANE/CAMP
GO_POSITIVE_REGULATION_OF_LYMPHOCYTE_ACTIVATION	GO_POSITIVE_REGULATION_OF_LYMPHOCYTE_ACTIVATION	257	0.610405	1.78968	1.05962e-06	8.99906e-05	7.08373e-05	1359	tags=17%, list=9%, signal=16%	3552/3553/3559/29126/6347/7293/51561/970/8808/114548/941/8651/4323/8740/1236/84868/6714/1880/29851/1326/79155/558/148022/10892/6541/1604/101/7037/3458/4860/7525/10148/58515/64332/57178/7494/5063/4773/7040/8546/3105/55183/8772/10125	IL1A/IL1B/IL2RA/CD274/CCL2/TNFRSF4/IL23A/CD70/IL1RL2/NLRP3/CD80/SOCS1/MMP14/TNFSF14/CCR7/HAVCR2/SRC/GPR183/ICOS/MAP3K8/TNIP2/AXL/TICAM1/MALT1/SLC7A1/CD55/ADAM8/TFRC/IFNG/PNP/YES1/EBI3/SELENOK/NFKBIZ/ZMIZ1/XBP1/PAK3/NFATC2/TGFB1/AP3B1/HLA-A/RIF1/FADD/RASGRP1
GO_REGULATION_OF_HEMOPOIESIS	GO_REGULATION_OF_HEMOPOIESIS	422	0.55963	1.67594	1.09124e-06	9.10211e-05	7.16485e-05	2491	tags=26%, list=16%, signal=22%	3552/3553/6348/3559/9636/8013/51561/8808/114548/941/7057/8651/1435/7124/4323/7098/441478/4780/639/8111/6772/3665/8784/1636/3976/558/80149/2624/10892/3659/101/5814/3458/4860/6774/4851/64332/79577/7107/760/5610/5716/57178/6935/4792/7494/25/140685/54542/4763/4773/7040/8546/4853/92/23774/28514/8772/10125/54997/3205/169200/5469/29843/3902/9308/161882/246778/3958/5008/9491/864/5295/83737/861/5695/6886/…	IL1A/IL1B/CCL3/IL2RA/ISG15/NR4A3/IL23A/IL1RL2/NLRP3/CD80/THBS1/SOCS1/CSF1/TNF/MMP14/TLR3/NRARP/NFE2L2/PRDM1/GPR68/STAT1/IRF7/TNFRSF18/ACE/LIF/AXL/ZC3H12A/GATA2/MALT1/IRF1/ADAM8/PURB/IFNG/PNP/STAT3/NOTCH1/NFKBIZ/CDC73/GPR137B/CA2/EIF2AK2/PSMD10/ZMIZ1/ZEB1/NFKBIA/XBP1/ABL1/ZBTB46/RC3H2/NF1/NFATC2/TGFB1/AP3B1/NOTCH2/ACVR2A/BRD1/DLL1/FADD/RASGRP1/TESC/HOXA9/TMEM64/MED1/SENP1/LAG3/CD83/ZFPM1/IL27/LGAL…
GO_NEGATIVE_REGULATION_OF_APOPTOTIC_SIGNALING_PATHWAY	GO_NEGATIVE_REGULATION_OF_APOPTOTIC_SIGNALING_PATHWAY	195	0.644612	1.85753	1.12992e-06	9.25938e-05	7.28865e-05	1517	tags=23%, list=10%, signal=21%	3552/3553/5743/6648/356/5329/3383/7057/6615/7124/4780/6714/355/960/7128/1491/57007/3685/4582/8743/637/551/117584/8837/7046/64114/5770/2907/2729/10105/25994/5716/8682/55829/7494/7009/64844/2023/5663/8772/6880/7186/8795/50484/5598	IL1A/IL1B/PTGS2/SOD2/FASLG/PLAUR/ICAM1/THBS1/SNAI1/TNF/NFE2L2/SRC/FAS/CD44/TNFAIP3/CTH/ACKR3/ITGAV/MUC1/TNFSF10/BID/AVP/RFFL/CFLAR/TGFBR1/TMBIM1/PTPN1/GRINA/GCLC/PPIF/HIGD1A/PSMD10/PEA15/SELENOS/XBP1/TMBIM6/MARCHF7/ENO1/PSEN1/FADD/TAF9/TRAF2/TNFRSF10B/RRM2B/MAPK7
GO_VIRAL_LIFE_CYCLE	GO_VIRAL_LIFE_CYCLE	299	0.591597	1.74859	1.29531e-06	0.00010261	8.07707e-05	1858	tags=24%, list=12%, signal=21%	6355/6590/8638/3576/27074/9636/24138/6347/7293/3383/1514/941/2838/7124/4599/10318/6737/5359/3685/4864/5806/51510/5371/558/80149/1604/8372/3669/7037/5034/5045/10663/4851/55337/7251/9818/4939/5610/3428/103/3836/2040/5868/7706/50848/6780/3688/79720/3949/26986/128866/4734/23327/57132/85363/290/4928/7879/81876/5479/56829/5586/89853/23601/137492/3416/83737/8519/950/55128/51652	CCL8/SLPI/OASL/CXCL8/LAMP3/ISG15/IFIT5/CCL2/TNFRSF4/ICAM1/CTSL/CD80/GPR15/TNF/MX1/TNIP1/TRIM21/PLSCR1/ITGAV/NPC1/PTX3/CHMP5/PML/AXL/ZC3H12A/CD55/HYAL3/ISG20/TFRC/P4HB/FURIN/CXCR6/NOTCH1/SHFL/TSG101/NUP58/OAS2/EIF2AK2/IFI16/ADAR/KPNA1/STOM/RAB5A/TRIM25/F11R/STAU1/ITGB1/VPS37B/LDLR/PABPC1/CHMP4B/NEDD4/NEDD4L/CHMP1B/TRIM5/ANPEP/NUP98/RAB7A/RAB1B/PPIB/ZC3HAV1/PKN2/MVB12B/CLEC5A/VPS37A/IDE/ITCH/IFITM1…
GO_NEGATIVE_REGULATION_OF_RESPONSE_TO_EXTERNAL_STIMULUS	GO_NEGATIVE_REGULATION_OF_RESPONSE_TO_EXTERNAL_STIMULUS	298	0.5885	1.73899	1.29608e-06	0.00010261	8.07707e-05	1851	tags=22%, list=12%, signal=20%	2853/7130/5055/3559/26585/10203/6347/384/8530/1906/5272/5329/1991/114548/7057/4790/7124/3586/7035/5328/84868/284207/7133/79132/84830/7128/4681/10906/80149/5467/8482/56963/9111/4851/4925/1398/2043/3428/103/10512/2358/9021/55829/3949/135228/53833/10371/5468/3105/7474/23332/114897/27250/6696/5598/64771/135/5154/388581/83999/285/83737/5624/4856/54625/54910	GPR31/TNFAIP6/SERPINB2/IL2RA/GREM1/CALCRL/CCL2/ARG2/CST7/EDN1/SERPINB9/PLAUR/ELANE/NLRP3/THBS1/NFKB1/TNF/IL10/TFPI/PLAU/HAVCR2/METRNL/TNFRSF1B/DHX58/ADTRP/TNFAIP3/NA/TRAFD1/ZC3H12A/PPARD/SEMA7A/RGMA/NMI/NOTCH1/NUCB2/CRK/EPHA4/IFI16/ADAR/SEMA3C/FPR2/SOCS3/SELENOS/LDLR/CD109/IL20RB/SEMA3A/PPARG/HLA-A/WNT5A/CLASP1/C1QTNF1/PDCD4/SPP1/MAPK7/ILRUN/ADORA2A/PDGFA/C1QTNF12/KREMEN1/ANGPT2/ITCH/PROC/CCN3/PA…
GO_TUMOR_NECROSIS_FACTOR_SUPERFAMILY_CYTOKINE_PRODUCTION	GO_TUMOR_NECROSIS_FACTOR_SUPERFAMILY_CYTOKINE_PRODUCTION	138	0.68032	1.90683	1.55554e-06	0.000121098	9.53243e-05	1359	tags=22%, list=9%, signal=20%	3552/6348/29126/671/384/51561/64135/7057/7098/3586/84868/23586/5005/7128/558/80149/148022/101/3458/64343/6774/58515/4157/55829/7855/5004/5663/7474/8772/10125	IL1A/CCL3/CD274/BPI/ARG2/IL23A/IFIH1/THBS1/TLR3/IL10/HAVCR2/DDX58/ORM2/TNFAIP3/AXL/ZC3H12A/TICAM1/ADAM8/IFNG/AZI2/STAT3/SELENOK/MC1R/SELENOS/FZD5/ORM1/PSEN1/WNT5A/FADD/RASGRP1
GO_REGULATION_OF_VIRAL_LIFE_CYCLE	GO_REGULATION_OF_VIRAL_LIFE_CYCLE	131	0.687086	1.91646	1.60661e-06	0.000123024	9.68401e-05	2055	tags=32%, list=13%, signal=28%	6355/6590/8638/3576/27074/9636/24138/7124/4599/10318/6737/5359/5806/5371/80149/3669/5034/4851/55337/7251/4939/5610/3428/103/2040/7706/6780/79720/26986/128866/85363/5479/56829/5586/8519/55128/51652/25978/55254/60489/4940/64848	CCL8/SLPI/OASL/CXCL8/LAMP3/ISG15/IFIT5/TNF/MX1/TNIP1/TRIM21/PLSCR1/PTX3/PML/ZC3H12A/ISG20/P4HB/NOTCH1/SHFL/TSG101/OAS2/EIF2AK2/IFI16/ADAR/STOM/TRIM25/STAU1/VPS37B/PABPC1/CHMP4B/TRIM5/PPIB/ZC3HAV1/PKN2/IFITM1/TRIM68/CHMP3/CHMP2B/TMEM39A/APOBEC3G/OAS3/YTHDC2
GO_REGULATION_OF_LEUKOCYTE_DIFFERENTIATION	GO_REGULATION_OF_LEUKOCYTE_DIFFERENTIATION	244	0.611024	1.78624	1.66728e-06	0.00012561	9.8876e-05	1466	tags=19%, list=10%, signal=18%	3552/3553/6348/3559/51561/8808/114548/941/8651/1435/7124/4323/7098/441478/639/8111/3665/8784/3976/558/80149/2624/10892/3659/101/3458/4860/64332/7107/760/57178/6935/7494/25/140685/54542/4763/4773/7040/8546/4853/8772/10125/54997/169200/3902/9308	IL1A/IL1B/CCL3/IL2RA/IL23A/IL1RL2/NLRP3/CD80/SOCS1/CSF1/TNF/MMP14/TLR3/NRARP/PRDM1/GPR68/IRF7/TNFRSF18/LIF/AXL/ZC3H12A/GATA2/MALT1/IRF1/ADAM8/IFNG/PNP/NFKBIZ/GPR137B/CA2/ZMIZ1/ZEB1/XBP1/ABL1/ZBTB46/RC3H2/NF1/NFATC2/TGFB1/AP3B1/NOTCH2/FADD/RASGRP1/TESC/TMEM64/LAG3/CD83
GO_REGULATION_OF_NEUROINFLAMMATORY_RESPONSE	GO_REGULATION_OF_NEUROINFLAMMATORY_RESPONSE	23	0.903074	1.99435	1.74704e-06	0.000129531	0.000101962	366	tags=30%, list=2%, signal=30%	3553/5743/6348/8530/7124/8877/7133	IL1B/PTGS2/CCL3/CST7/TNF/SPHK1/TNFRSF1B
GO_NATURAL_KILLER_CELL_CHEMOTAXIS	GO_NATURAL_KILLER_CELL_CHEMOTAXIS	10	0.961429	1.85052	1.95595e-06	0.000142754	0.00011237	124	tags=40%, list=1%, signal=40%	6348/6351/6354/6347	CCL3/CCL4/CCL7/CCL2
GO_POSITIVE_REGULATION_OF_SMOOTH_MUSCLE_CELL_PROLIFERATION	GO_POSITIVE_REGULATION_OF_SMOOTH_MUSCLE_CELL_PROLIFERATION	74	0.750255	1.96471	2.04135e-06	0.000146695	0.000115473	409	tags=16%, list=3%, signal=16%	5743/2069/5031/8013/10203/1906/1991/7057/7124/3586/10135/6772	PTGS2/EREG/P2RY6/NR4A3/CALCRL/EDN1/ELANE/THBS1/TNF/IL10/NAMPT/STAT1
GO_NEGATIVE_REGULATION_OF_VIRAL_LIFE_CYCLE	GO_NEGATIVE_REGULATION_OF_VIRAL_LIFE_CYCLE	70	0.75869	1.97226	2.19364e-06	0.00015525	0.000122207	1007	tags=27%, list=7%, signal=25%	6355/6590/8638/9636/24138/7124/4599/10318/6737/5359/5806/5371/80149/3669/55337/4939/5610/3428/7706	CCL8/SLPI/OASL/ISG15/IFIT5/TNF/MX1/TNIP1/TRIM21/PLSCR1/PTX3/PML/ZC3H12A/ISG20/SHFL/OAS2/EIF2AK2/IFI16/TRIM25
GO_POSITIVE_REGULATION_OF_LEUKOCYTE_DIFFERENTIATION	GO_POSITIVE_REGULATION_OF_LEUKOCYTE_DIFFERENTIATION	138	0.676549	1.89626	2.4579e-06	0.000171356	0.000134885	1466	tags=22%, list=10%, signal=20%	3552/3553/3559/51561/8808/114548/941/8651/1435/7124/4323/8111/3976/558/10892/101/3458/4860/64332/760/57178/7494/140685/7040/8546/4853/8772/10125/54997/169200/9308	IL1A/IL1B/IL2RA/IL23A/IL1RL2/NLRP3/CD80/SOCS1/CSF1/TNF/MMP14/GPR68/LIF/AXL/MALT1/ADAM8/IFNG/PNP/NFKBIZ/CA2/ZMIZ1/XBP1/ZBTB46/TGFB1/AP3B1/NOTCH2/FADD/RASGRP1/TESC/TMEM64/CD83
GO_EXTRINSIC_APOPTOTIC_SIGNALING_PATHWAY	GO_EXTRINSIC_APOPTOTIC_SIGNALING_PATHWAY	194	0.630395	1.81579	2.83639e-06	0.000194835	0.000153367	1608	tags=21%, list=10%, signal=19%	3552/3553/970/597/7185/356/3383/7057/7124/7098/5979/6714/355/7133/6498/7128/3685/8743/637/5371/7227/117584/3458/8837/836/7046/64114/2729/7042/8682/4763/7040/81537/2923/8772/7186/8795/5598/3934/3958	IL1A/IL1B/CD70/BCL2A1/TRAF1/FASLG/ICAM1/THBS1/TNF/TLR3/RET/SRC/FAS/TNFRSF1B/SKIL/TNFAIP3/ITGAV/TNFSF10/BID/PML/TRPS1/RFFL/IFNG/CFLAR/CASP3/TGFBR1/TMBIM1/GCLC/TGFB2/PEA15/NF1/TGFB1/SGPP1/PDIA3/FADD/TRAF2/TNFRSF10B/MAPK7/LCN2/LGALS3
GO_NEGATIVE_REGULATION_OF_PEPTIDASE_ACTIVITY	GO_NEGATIVE_REGULATION_OF_PEPTIDASE_ACTIVITY	156	0.653734	1.85246	3.10927e-06	0.000210484	0.000165685	1188	tags=21%, list=8%, signal=19%	5743/6590/5055/7980/27074/718/8530/5272/5329/7057/7124/8740/7035/6714/330/329/960/7422/7076/25816/551/1992/117584/5045/8837/3428/8301/25824/1476/5447/135228/2597	PTGS2/SLPI/SERPINB2/TFPI2/LAMP3/C3/CST7/SERPINB9/PLAUR/THBS1/TNF/TNFSF14/TFPI/SRC/BIRC3/BIRC2/CD44/VEGFA/TIMP1/TNFAIP8/AVP/SERPINB1/RFFL/FURIN/CFLAR/IFI16/PICALM/PRDX5/CSTB/POR/CD109/GAPDH
GO_EOSINOPHIL_MIGRATION	GO_EOSINOPHIL_MIGRATION	15	0.931489	1.91404	3.19047e-06	0.000212895	0.000167583	124	tags=47%, list=1%, signal=46%	6355/6348/6351/6354/8288/3269/6347	CCL8/CCL3/CCL4/CCL7/EPX/HRH1/CCL2
GO_REGULATION_OF_LEUKOCYTE_PROLIFERATION	GO_REGULATION_OF_LEUKOCYTE_PROLIFERATION	199	0.627611	1.81094	3.80202e-06	0.00025013	0.000196893	784	tags=15%, list=5%, signal=14%	3552/3553/6355/3559/29126/26585/384/7293/51561/970/941/1435/3586/6385/84868/7133/1880/7128/944/148022/6541/3659/1604/7037/4860/10148/836/58515/57045	IL1A/IL1B/CCL8/IL2RA/CD274/GREM1/ARG2/TNFRSF4/IL23A/CD70/CD80/CSF1/IL10/SDC4/HAVCR2/TNFRSF1B/GPR183/TNFAIP3/TNFSF8/TICAM1/SLC7A1/IRF1/CD55/TFRC/PNP/EBI3/CASP3/SELENOK/TWSG1
GO_POSITIVE_REGULATION_OF_LEUKOCYTE_CHEMOTAXIS	GO_POSITIVE_REGULATION_OF_LEUKOCYTE_CHEMOTAXIS	74	0.743242	1.94634	3.97262e-06	0.000257724	0.000202871	606	tags=18%, list=4%, signal=17%	6348/6351/6354/3576/51561/1906/7057/1435/8740/1236/7422/9943/5641	CCL3/CCL4/CCL7/CXCL8/IL23A/EDN1/THBS1/CSF1/TNFSF14/CCR7/VEGFA/OXSR1/LGMN
GO_REGULATION_OF_LEUKOCYTE_CHEMOTAXIS	GO_REGULATION_OF_LEUKOCYTE_CHEMOTAXIS	97	0.72407	1.95845	4.21091e-06	0.00026944	0.000212094	606	tags=16%, list=4%, signal=16%	6348/6351/6354/3576/26585/6347/51561/1906/7057/1435/8740/1236/7422/9943/4681/5641	CCL3/CCL4/CCL7/CXCL8/GREM1/CCL2/IL23A/EDN1/THBS1/CSF1/TNFSF14/CCR7/VEGFA/OXSR1/NA/LGMN
GO_SECOND_MESSENGER_MEDIATED_SIGNALING	GO_SECOND_MESSENGER_MEDIATED_SIGNALING	304	0.577537	1.70884	4.35873e-06	0.000274957	0.000216436	1203	tags=15%, list=8%, signal=14%	6364/6348/6351/3576/23566/9034/5031/4283/23551/3269/10203/1906/10900/7057/1233/7124/2833/1236/84174/151/5141/8877/1193/7422/57007/136/3632/79924/9446/5144/54331/10725/10663/55784/58515/30817/4157/2696/3577/2358/575/7320/9693/4772/4773	CCL20/CCL3/CCL4/CXCL8/LPAR3/CCRL2/P2RY6/CXCL9/RASD2/HRH1/CALCRL/EDN1/RUNDC3A/THBS1/CCR4/TNF/CXCR3/CCR7/SLA2/ADRA2B/PDE4A/SPHK1/CLIC2/VEGFA/ACKR3/ADORA2B/INPP5A/ADM2/GSTO1/PDE4D/GNG2/NFAT5/CXCR6/MCTP2/SELENOK/ADGRE2/MC1R/GIPR/CXCR1/FPR2/ADGRB1/UBE2B/RAPGEF2/NFATC1/NFATC2
GO_INTERFERON_GAMMA_PRODUCTION	GO_INTERFERON_GAMMA_PRODUCTION	94	0.721983	1.9454	4.48632e-06	0.000274957	0.000216436	1585	tags=30%, list=10%, signal=27%	3553/29126/9636/3554/51561/9173/8140/5142/7124/7098/1236/3586/84868/558/80149/5144/10148/64343/4049/7855/53833/3105/7474/8772/10125/3702/161882/246778	IL1B/CD274/ISG15/IL1R1/IL23A/IL1RL1/SLC7A5/PDE4B/TNF/TLR3/CCR7/IL10/HAVCR2/AXL/ZC3H12A/PDE4D/EBI3/AZI2/LTA/FZD5/IL20RB/HLA-A/WNT5A/FADD/RASGRP1/ITK/ZFPM1/IL27
GO_ORGANIC_HYDROXY_COMPOUND_BIOSYNTHETIC_PROCESS	GO_ORGANIC_HYDROXY_COMPOUND_BIOSYNTHETIC_PROCESS	189	0.62873	1.80765	4.50881e-06	0.000274957	0.000216436	1870	tags=26%, list=12%, signal=23%	3553/9464/23657/5031/3269/3642/654/6615/4790/1717/7124/51700/3638/8877/23541/2643/51141/6309/9839/3458/11001/6721/4157/3157/64768/650/2805/253430/7042/5447/80271/4923/9693/134429/9807/11161/7474/8309/10558/116150/114883/50814/51422/5341/1727/114880/7421/126321/10826	IL1B/HAND2/SLC7A11/P2RY6/HRH1/INSM1/BMP6/SNAI1/NFKB1/DHCR7/TNF/CYB5R2/INSIG1/SPHK1/SEC14L2/GCH1/INSIG2/SC5D/ZEB2/IFNG/SLC27A2/SREBF2/MC1R/HMGCS1/IPPK/BMP2/GOT1/IPMK/TGFB2/POR/ITPKC/NTSR1/RAPGEF2/STARD4/IP6K1/ERG28/WNT5A/ACOX2/SPTLC1/NUS1/OSBPL9/NSDHL/PRKAG2/PLEK/CYB5R3/OSBPL6/VDR/MFSD12/FAXDC2
GO_LEUKOCYTE_DIFFERENTIATION	GO_LEUKOCYTE_DIFFERENTIATION	454	0.540701	1.62249	4.53259e-06	0.000274957	0.000216436	1821	tags=21%, list=12%, signal=19%	3552/3553/6348/3589/3559/51561/7471/1514/8808/114548/941/8651/1435/1053/7124/4323/7098/1236/441478/10538/3586/6714/639/22904/8111/1880/7422/3665/8784/3714/3976/944/5657/4914/558/80149/2624/10892/3659/101/7037/3458/4860/64343/6774/64332/6729/7107/760/3428/9452/3955/57178/6935/5971/9644/3688/7855/7494/25/140685/135228/54542/4763/4773/7040/4189/5468/8546/4853/28514/5663/27102/8772/10125/54997/169200…	IL1A/IL1B/CCL3/IL11/IL2RA/IL23A/WNT1/CTSL/IL1RL2/NLRP3/CD80/SOCS1/CSF1/CEBPE/TNF/MMP14/TLR3/CCR7/NRARP/BATF/IL10/SRC/PRDM1/SBNO2/GPR68/GPR183/VEGFA/IRF7/TNFRSF18/JAG2/LIF/TNFSF8/PRTN3/NTRK1/AXL/ZC3H12A/GATA2/MALT1/IRF1/ADAM8/TFRC/IFNG/PNP/AZI2/STAT3/NFKBIZ/SRP54/GPR137B/CA2/IFI16/ITM2A/LFNG/ZMIZ1/ZEB1/RELB/SH3PXD2A/ITGB1/FZD5/XBP1/ABL1/ZBTB46/CD109/RC3H2/NF1/NFATC2/TGFB1/DNAJB9/PPARG/AP3B1/NOTCH2…
GO_EOSINOPHIL_CHEMOTAXIS	GO_EOSINOPHIL_CHEMOTAXIS	11	0.958423	1.87263	4.7125e-06	0.000282206	0.000222142	124	tags=55%, list=1%, signal=54%	6355/6348/6351/6354/3269/6347	CCL8/CCL3/CCL4/CCL7/HRH1/CCL2
GO_FEVER_GENERATION	GO_FEVER_GENERATION	10	0.955104	1.83835	4.95151e-06	0.000292766	0.000230455	241	tags=40%, list=2%, signal=39%	3552/3553/5743/7124	IL1A/IL1B/PTGS2/TNF
GO_NEGATIVE_REGULATION_OF_VIRAL_GENOME_REPLICATION	GO_NEGATIVE_REGULATION_OF_VIRAL_GENOME_REPLICATION	52	0.792263	1.97976	6.07545e-06	0.00035473	0.000279231	888	tags=29%, list=6%, signal=27%	6355/6590/8638/9636/24138/7124/4599/10318/5359/80149/3669/55337/4939/5610/3428	CCL8/SLPI/OASL/ISG15/IFIT5/TNF/MX1/TNIP1/PLSCR1/ZC3H12A/ISG20/SHFL/OAS2/EIF2AK2/IFI16
GO_REGULATION_OF_APOPTOTIC_SIGNALING_PATHWAY	GO_REGULATION_OF_APOPTOTIC_SIGNALING_PATHWAY	354	0.5536	1.6489	6.30369e-06	0.000363513	0.000286144	2424	tags=25%, list=16%, signal=22%	3552/3553/5743/6648/7185/356/5329/3383/664/7057/6615/7124/5979/4780/1687/6714/355/960/26355/6498/7128/1491/57007/3685/4582/8743/637/5371/551/7227/117584/5034/8837/7046/64114/5770/2907/2729/10105/25994/5716/8682/55829/7494/7532/7009/3625/4763/10955/64844/2023/5663/2923/8772/6880/7186/8795/50484/5598/135/3958/2773/6279/2260/5599/23368/50486/10625/8737/7159/8738/5534/51530/259230/2534/9705/10488/253…	IL1A/IL1B/PTGS2/SOD2/TRAF1/FASLG/PLAUR/ICAM1/BNIP3/THBS1/SNAI1/TNF/RET/NFE2L2/GSDME/SRC/FAS/CD44/FAM162A/SKIL/TNFAIP3/CTH/ACKR3/ITGAV/MUC1/TNFSF10/BID/PML/AVP/TRPS1/RFFL/P4HB/CFLAR/TGFBR1/TMBIM1/PTPN1/GRINA/GCLC/PPIF/HIGD1A/PSMD10/PEA15/SELENOS/XBP1/YWHAG/TMBIM6/INHBB/NF1/SERINC3/MARCHF7/ENO1/PSEN1/PDIA3/FADD/TAF9/TRAF2/TNFRSF10B/RRM2B/MAPK7/ADORA2A/LGALS3/GNAI3/S100A8/FGFR1/MAPK8/PPP1R13B/G0S2/I…
GO_REGULATION_OF_IMMUNE_EFFECTOR_PROCESS	GO_REGULATION_OF_IMMUNE_EFFECTOR_PROCESS	339	0.565214	1.68048	6.53697e-06	0.000372368	0.000293115	1608	tags=21%, list=10%, signal=19%	3553/629/3559/718/8013/3554/7293/51561/5272/3383/8140/114548/941/7124/7098/3586/84868/23586/330/329/7133/151636/79132/6772/7128/136/10758/80149/2624/148022/10892/1604/7187/83666/8482/7037/3458/58515/64332/1398/30817/6830/51191/2889/7042/4049/6845/7855/7494/2821/5906/54476/54542/7009/53833/7040/81545/3105/55183/7474/8772/4068/10125/7186/719/3902/10269/3140/5795/64771/246778/3958	IL1B/CFB/IL2RA/C3/NR4A3/IL1R1/TNFRSF4/IL23A/SERPINB9/ICAM1/SLC7A5/NLRP3/CD80/TNF/TLR3/IL10/HAVCR2/DDX58/BIRC3/BIRC2/TNFRSF1B/DTX3L/DHX58/STAT1/TNFAIP3/ADORA2B/TRAF3IP2/ZC3H12A/GATA2/TICAM1/MALT1/CD55/TRAF3/PARP9/SEMA7A/TFRC/IFNG/SELENOK/NFKBIZ/CRK/ADGRE2/SUPT6H/HERC5/RAPGEF1/TGFB2/LTA/VAMP7/FZD5/XBP1/GPI/RAP1A/RNF216/RC3H2/TMBIM6/IL20RB/TGFB1/FBXO38/HLA-A/RIF1/WNT5A/FADD/SH2D1A/RASGRP1/TRAF2/C3AR…
GO_MYELOID_CELL_DIFFERENTIATION	GO_MYELOID_CELL_DIFFERENTIATION	365	0.553185	1.64937	6.64661e-06	0.000374052	0.00029444	2491	tags=28%, list=16%, signal=24%	6348/3589/9636/8013/51561/7057/1435/1053/7124/7098/1236/10538/6714/22904/8111/1880/7422/6772/3665/3976/5657/5371/2624/211/54790/5814/7037/3458/836/669/6774/4891/79577/6729/7107/760/3428/103/5971/9644/4792/140685/135228/4763/7040/5468/4853/92/23774/28514/5663/27102/8772/54997/3205/169200/5469/29843/6005/5048/7049/161882/4779/29887/3958/9948/23601/3658/5295/3516/861/6886/10826/55904/6521/3398/27327…	CCL3/IL11/ISG15/NR4A3/IL23A/THBS1/CSF1/CEBPE/TNF/TLR3/CCR7/BATF/SRC/SBNO2/GPR68/GPR183/VEGFA/STAT1/IRF7/LIF/PRTN3/PML/GATA2/ALAS1/TET2/PURB/TFRC/IFNG/CASP3/BPGM/STAT3/SLC11A2/CDC73/SRP54/GPR137B/CA2/IFI16/ADAR/RELB/SH3PXD2A/NFKBIA/ZBTB46/CD109/NF1/TGFB1/PPARG/NOTCH2/ACVR2A/BRD1/DLL1/PSEN1/EIF2AK1/FADD/TESC/HOXA9/TMEM64/MED1/SENP1/RHAG/PAFAH1B1/TGFBR3/ZFPM1/NFE2L1/SNX10/LGALS3/WDR1/CLEC5A/IREB2/PI…
GO_NEGATIVE_REGULATION_OF_IMMUNE_SYSTEM_PROCESS	GO_NEGATIVE_REGULATION_OF_IMMUNE_SYSTEM_PROCESS	370	0.548595	1.63632	7.35204e-06	0.000408826	0.000321813	1857	tags=21%, list=12%, signal=19%	6348/3559/29126/26585/6347/671/384/8530/5272/9173/941/7057/8651/7124/7098/441478/3586/4780/6385/84868/84174/64092/8111/79132/84830/7128/9404/4681/10906/558/80149/2624/3659/1604/836/9111/4851/57045/1398/79577/7107/3428/103/7042/55829/4792/3949/140685/54900/54542/7009/53833/4763/7040/5468/64844/28514/3105/1997/8772/4068/3205/3902/5795/5133/64771/161882/135/3958/864/5295/83737/8379/861/4856/6886/546…	CCL3/IL2RA/CD274/GREM1/CCL2/BPI/ARG2/CST7/SERPINB9/IL1RL1/CD80/THBS1/SOCS1/TNF/TLR3/NRARP/IL10/NFE2L2/SDC4/HAVCR2/SLA2/NA/GPR68/DHX58/ADTRP/TNFAIP3/LPXN/TRAFD1/AXL/ZC3H12A/GATA2/IRF1/CD55/CASP3/NMI/NOTCH1/TWSG1/CRK/CDC73/GPR137B/IFI16/ADAR/TGFB2/SELENOS/NFKBIA/LDLR/ZBTB46/LAX1/RC3H2/TMBIM6/IL20RB/NF1/TGFB1/PPARG/MARCHF7/DLL1/HLA-A/ELF1/FADD/SH2D1A/HOXA9/LAG3/PTPRJ/PDCD1/ILRUN/ZFPM1/ADORA2A/LGALS3…
GO_REGULATION_OF_LYMPHOCYTE_ACTIVATION	GO_REGULATION_OF_LYMPHOCYTE_ACTIVATION	390	0.553598	1.65387	7.75775e-06	0.000426311	0.000335577	1359	tags=17%, list=9%, signal=16%	3552/3553/3559/29126/6347/384/7293/51561/970/8808/114548/941/8651/4323/8740/1236/441478/3586/6385/84868/64092/6714/639/7133/1880/29851/7128/1326/8784/944/79155/558/80149/148022/10892/6541/3659/1604/101/7037/3458/4860/7525/10148/836/58515/64332/57045/6830/57178/6935/7494/25/54900/54542/5063/53833/4773/7040/8546/64844/3105/55183/8772/10125	IL1A/IL1B/IL2RA/CD274/CCL2/ARG2/TNFRSF4/IL23A/CD70/IL1RL2/NLRP3/CD80/SOCS1/MMP14/TNFSF14/CCR7/NRARP/IL10/SDC4/HAVCR2/NA/SRC/PRDM1/TNFRSF1B/GPR183/ICOS/TNFAIP3/MAP3K8/TNFRSF18/TNFSF8/TNIP2/AXL/ZC3H12A/TICAM1/MALT1/SLC7A1/IRF1/CD55/ADAM8/TFRC/IFNG/PNP/YES1/EBI3/CASP3/SELENOK/NFKBIZ/TWSG1/SUPT6H/ZMIZ1/ZEB1/XBP1/ABL1/LAX1/RC3H2/PAK3/IL20RB/NFATC2/TGFB1/AP3B1/MARCHF7/HLA-A/RIF1/FADD/RASGRP1
GO_REGULATION_OF_RESPONSE_TO_BIOTIC_STIMULUS	GO_REGULATION_OF_RESPONSE_TO_BIOTIC_STIMULUS	354	0.550878	1.64079	8.80437e-06	0.0004782	0.000376422	1902	tags=21%, list=12%, signal=19%	3553/3559/29126/2069/384/51561/5272/11274/654/8651/4790/84868/23586/6714/330/329/5359/151636/79132/6772/7128/3665/115362/10758/4582/10133/10906/80149/10892/3659/1604/7187/3460/83666/101/3458/9111/58515/1398/5770/3428/103/5716/51191/23118/2358/9021/257397/5971/54476/5063/5468/81545/3105/85363/7474/8772/4068/10125/3093/5469/3902/10269/3140/64771/246778/23291/9491/83737/115004/23705/5695/54625/5704/…	IL1B/IL2RA/CD274/EREG/ARG2/IL23A/SERPINB9/USP18/BMP6/SOCS1/NFKB1/HAVCR2/DDX58/SRC/BIRC3/BIRC2/PLSCR1/DTX3L/DHX58/STAT1/TNFAIP3/IRF7/GBP5/TRAF3IP2/MUC1/OPTN/TRAFD1/ZC3H12A/MALT1/IRF1/CD55/TRAF3/IFNGR2/PARP9/ADAM8/IFNG/NMI/SELENOK/CRK/PTPN1/IFI16/ADAR/PSMD10/HERC5/TAB2/FPR2/SOCS3/TAB3/RELB/RNF216/PAK3/PPARG/FBXO38/HLA-A/TRIM5/WNT5A/FADD/SH2D1A/RASGRP1/UBE2K/MED1/LAG3/ZMPSTE24/MR1/ILRUN/IL27/FBXW11/…
GO_LEUKOCYTE_PROLIFERATION	GO_LEUKOCYTE_PROLIFERATION	253	0.586145	1.71711	9.50523e-06	0.000510333	0.000401715	784	tags=13%, list=5%, signal=13%	3552/3553/6355/3559/29126/26585/384/7293/51561/970/941/1435/8740/3586/6385/84868/7133/1880/7128/1636/944/148022/10892/6541/3659/1604/7037/4860/10148/836/64343/58515/57045	IL1A/IL1B/CCL8/IL2RA/CD274/GREM1/ARG2/TNFRSF4/IL23A/CD70/CD80/CSF1/TNFSF14/IL10/SDC4/HAVCR2/TNFRSF1B/GPR183/TNFAIP3/ACE/TNFSF8/TICAM1/MALT1/SLC7A1/IRF1/CD55/TFRC/PNP/EBI3/CASP3/AZI2/SELENOK/TWSG1
GO_VIRAL_GENOME_REPLICATION	GO_VIRAL_GENOME_REPLICATION	113	0.683224	1.8779	1.00667e-05	0.000534335	0.000420609	1137	tags=21%, list=7%, signal=20%	6355/6590/8638/3576/9636/24138/6347/7124/4599/10318/5359/80149/3669/10663/4851/55337/4939/5610/3428/103/2040/5868/6780/26986	CCL8/SLPI/OASL/CXCL8/ISG15/IFIT5/CCL2/TNF/MX1/TNIP1/PLSCR1/ZC3H12A/ISG20/CXCR6/NOTCH1/SHFL/OAS2/EIF2AK2/IFI16/ADAR/STOM/RAB5A/STAU1/PABPC1
GO_POSITIVE_REGULATION_OF_NIK_NF_KAPPAB_SIGNALING	GO_POSITIVE_REGULATION_OF_NIK_NF_KAPPAB_SIGNALING	70	0.741029	1.92635	1.05445e-05	0.000553411	0.000435625	1462	tags=27%, list=10%, signal=25%	3553/26585/51561/1906/7124/7098/8740/84868/8877/10892/10725/3987/5610/9966/54542/27250/7186/3654/8795	IL1B/GREM1/IL23A/EDN1/TNF/TLR3/TNFSF14/HAVCR2/SPHK1/MALT1/NFAT5/LIMS1/EIF2AK2/TNFSF15/RC3H2/PDCD4/TRAF2/IRAK1/TNFRSF10B
GO_REGULATION_OF_EXTRINSIC_APOPTOTIC_SIGNALING_PATHWAY	GO_REGULATION_OF_EXTRINSIC_APOPTOTIC_SIGNALING_PATHWAY	132	0.659091	1.83958	1.09527e-05	0.000567659	0.00044684	1517	tags=22%, list=10%, signal=20%	3552/3553/7185/356/3383/7057/7124/5979/6714/355/6498/7128/3685/8743/637/5371/7227/117584/8837/7046/64114/2729/8682/4763/2923/8772/7186/8795/5598	IL1A/IL1B/TRAF1/FASLG/ICAM1/THBS1/TNF/RET/SRC/FAS/SKIL/TNFAIP3/ITGAV/TNFSF10/BID/PML/TRPS1/RFFL/CFLAR/TGFBR1/TMBIM1/GCLC/PEA15/NF1/PDIA3/FADD/TRAF2/TNFRSF10B/MAPK7
GO_INTERLEUKIN_1_PRODUCTION	GO_INTERLEUKIN_1_PRODUCTION	85	0.720016	1.91703	1.10591e-05	0.000567659	0.00044684	1487	tags=27%, list=10%, signal=25%	3553/6348/114548/7124/1236/3586/84868/8877/5005/7128/115362/80149/10892/1992/3458/6774/24145/3428/7855/5004/7474/3140/56670	IL1B/CCL3/NLRP3/TNF/CCR7/IL10/HAVCR2/SPHK1/ORM2/TNFAIP3/GBP5/ZC3H12A/MALT1/SERPINB1/IFNG/STAT3/PANX1/IFI16/FZD5/ORM1/WNT5A/MR1/SUCNR1
GO_POSITIVE_REGULATION_OF_LYMPHOCYTE_DIFFERENTIATION	GO_POSITIVE_REGULATION_OF_LYMPHOCYTE_DIFFERENTIATION	94	0.707812	1.90721	1.1545e-05	0.0005833	0.000459153	929	tags=17%, list=6%, signal=16%	3552/3553/3559/51561/8808/114548/941/8651/4323/558/10892/101/3458/4860/64332/57178	IL1A/IL1B/IL2RA/IL23A/IL1RL2/NLRP3/CD80/SOCS1/MMP14/AXL/MALT1/ADAM8/IFNG/PNP/NFKBIZ/ZMIZ1
GO_GLIOGENESIS	GO_GLIOGENESIS	244	0.59323	1.73423	1.16135e-05	0.0005833	0.000459153	2423	tags=29%, list=16%, signal=25%	84504/3553/6348/2596/400746/80045/56978/92737/6347/6547/3908/664/1435/7124/4323/6497/9334/7133/1880/3976/4147/4664/3458/6774/4851/1267/2043/57178/2358/650/7042/4049/25/3949/7431/4763/7040/5468/5584/28514/5663/1464/5048/4779/135/9948/5324/6279/54413/6886/3398/5025/8892/5453/7097/2817/23376/10397/3845/566/9968/57721/2934/4152/351/79809/4067/5781/5970/301	NKX6-2/IL1B/CCL3/GAP43/NCMAP/GPR157/PRDM8/DNER/CCL2/SLC8A3/LAMA2/BNIP3/CSF1/TNF/MMP14/SKI/B4GALT5/TNFRSF1B/GPR183/LIF/MATN2/NAB1/IFNG/STAT3/NOTCH1/CNP/EPHA4/ZMIZ1/FPR2/BMP2/TGFB2/LTA/ABL1/LDLR/VIM/NF1/TGFB1/PPARG/PRKCI/DLL1/PSEN1/CSPG4/PAFAH1B1/NFE2L1/ADORA2A/WDR1/PLAG1/S100A8/NLGN3/TAL1/ID2/P2RX4/EIF2B2/POU3F1/TLR2/GPC1/UFL1/NDRG1/KRAS/AZU1/MED12/METTL14/GSN/MBD1/APP/TTC21B/LYN/PTPN11/RELA/ANXA1
GO_NEGATIVE_REGULATION_OF_CYSTEINE_TYPE_ENDOPEPTIDASE_ACTIVITY	GO_NEGATIVE_REGULATION_OF_CYSTEINE_TYPE_ENDOPEPTIDASE_ACTIVITY	76	0.734468	1.92914	1.21498e-05	0.000603741	0.000475243	1061	tags=26%, list=7%, signal=25%	5743/27074/8530/5272/5329/7057/7124/8740/6714/330/329/960/7422/25816/551/117584/8837/3428/25824/5447	PTGS2/LAMP3/CST7/SERPINB9/PLAUR/THBS1/TNF/TNFSF14/SRC/BIRC3/BIRC2/CD44/VEGFA/TNFAIP8/AVP/RFFL/CFLAR/IFI16/PRDX5/POR
GO_POSITIVE_REGULATION_OF_INFLAMMATORY_RESPONSE	GO_POSITIVE_REGULATION_OF_INFLAMMATORY_RESPONSE	111	0.680833	1.86779	1.25601e-05	0.00061756	0.000486121	1487	tags=24%, list=10%, signal=22%	3553/5743/6348/718/51561/9173/7124/7098/1236/10318/136/115362/148022/101/3458/6774/64332/4049/6845/4792/3949/4615/4363/7474/27250/7941/56670	IL1B/PTGS2/CCL3/C3/IL23A/IL1RL1/TNF/TLR3/CCR7/TNIP1/ADORA2B/GBP5/TICAM1/ADAM8/IFNG/STAT3/NFKBIZ/LTA/VAMP7/NFKBIA/LDLR/MYD88/ABCC1/WNT5A/PDCD4/PLA2G7/SUCNR1
GO_REGULATION_OF_T_CELL_DIFFERENTIATION	GO_REGULATION_OF_T_CELL_DIFFERENTIATION	131	0.666094	1.85791	1.27241e-05	0.000619108	0.000487339	1466	tags=21%, list=10%, signal=19%	3552/3553/3559/51561/8808/114548/941/8651/441478/639/8784/80149/10892/3659/101/3458/4860/64332/57178/6935/7494/25/54542/4773/8546/10125/3902/9308	IL1A/IL1B/IL2RA/IL23A/IL1RL2/NLRP3/CD80/SOCS1/NRARP/PRDM1/TNFRSF18/ZC3H12A/MALT1/IRF1/ADAM8/IFNG/PNP/NFKBIZ/ZMIZ1/ZEB1/XBP1/ABL1/RC3H2/NFATC2/AP3B1/RASGRP1/LAG3/CD83
GO_ACUTE_INFLAMMATORY_RESPONSE	GO_ACUTE_INFLAMMATORY_RESPONSE	77	0.736817	1.93831	1.31732e-05	0.000634349	0.000499336	1310	tags=25%, list=9%, signal=23%	3552/3553/5743/2152/718/1991/3383/114548/7124/1236/5359/5005/101/6774/55829/5004/53833/5468/27102	IL1A/IL1B/PTGS2/F3/C3/ELANE/ICAM1/NLRP3/TNF/CCR7/PLSCR1/ORM2/ADAM8/STAT3/SELENOS/ORM1/IL20RB/PPARG/EIF2AK1
GO_POSITIVE_REGULATION_OF_LEUKOCYTE_PROLIFERATION	GO_POSITIVE_REGULATION_OF_LEUKOCYTE_PROLIFERATION	123	0.669576	1.85685	1.50966e-05	0.000719555	0.000566407	772	tags=15%, list=5%, signal=14%	3552/3553/3559/29126/7293/51561/970/941/1435/84868/1880/148022/6541/1604/7037/4860/10148/58515	IL1A/IL1B/IL2RA/CD274/TNFRSF4/IL23A/CD70/CD80/CSF1/HAVCR2/GPR183/TICAM1/SLC7A1/CD55/TFRC/PNP/EBI3/SELENOK
GO_SIGNAL_RELEASE	GO_SIGNAL_RELEASE	450	0.520831	1.56246	1.74678e-05	0.000824164	0.000648752	1857	tags=19%, list=12%, signal=17%	3552/3553/3557/3589/384/7293/1906/9173/55638/654/64135/114548/8651/5552/338442/23413/7124/10815/3586/84868/6860/23586/151/6714/10814/8111/56729/5005/6513/3685/136/26251/3976/140679/80149/773/2182/5467/3458/6774/55784/58515/24145/8500/6536/8775/2696/80331/117247/5868/2029/9024/6845/7855/5004/5906/6616/3625/2597/4763/5798/5908/3937/5663/7474/114897/6853/6696/56670/51762/55512/135/5008/23601/388581/…	IL1A/IL1B/IL1RN/IL11/ARG2/TNFRSF4/EDN1/IL1RL1/SYBU/BMP6/IFIH1/NLRP3/SOCS1/SRGN/HCAR2/NCS1/TNF/CPLX1/IL10/HAVCR2/SYT4/DDX58/ADRA2B/SRC/CPLX2/GPR68/RETN/ORM2/SLC2A1/ITGAV/ADORA2B/KCNG2/LIF/SLC32A1/ZC3H12A/CACNA1A/ACSL4/PPARD/IFNG/STAT3/MCTP2/SELENOK/PANX1/PPFIA1/SLC6A9/NAPA/GIPR/DNAJC5/SLC16A10/RAB5A/ENSA/BRSK2/VAMP7/FZD5/ORM1/RAP1A/SNAP25/INHBB/GAPDH/NF1/PTPRN/RAP1B/LCP2/PSEN1/WNT5A/C1QTNF1/SYN1/S…
GO_POSITIVE_REGULATION_OF_SECRETION	GO_POSITIVE_REGULATION_OF_SECRETION	280	0.579353	1.70614	1.83379e-05	0.000848432	0.000667855	1857	tags=25%, list=12%, signal=23%	3552/3553/7293/1906/9173/55638/654/64135/338442/23413/7124/3586/6385/84868/6860/23586/6714/8111/10802/56729/5005/136/2624/551/8372/6386/2182/5467/101/3458/6774/58515/24145/7251/54843/2696/5868/7042/6845/7855/7494/5004/2821/134957/43/4923/3625/2597/9367/7040/7474/23332/114897/3783/7879/6696/5873/51762/55512/135/23601/388581/6279/2260/8564/25874/22930/23705/6812/8027/3566	IL1A/IL1B/TNFRSF4/EDN1/IL1RL1/SYBU/BMP6/IFIH1/HCAR2/NCS1/TNF/IL10/SDC4/HAVCR2/SYT4/DDX58/SRC/GPR68/SEC24A/RETN/ORM2/ADORA2B/GATA2/AVP/HYAL3/SDCBP/ACSL4/PPARD/ADAM8/IFNG/STAT3/SELENOK/PANX1/TSG101/SYTL2/GIPR/RAB5A/TGFB2/VAMP7/FZD5/XBP1/ORM1/GPI/STXBP5/ACHE/NTSR1/INHBB/GAPDH/RAB9A/TGFB1/WNT5A/CLASP1/C1QTNF1/KCNN4/RAB7A/SPP1/RAB27A/RAB8B/SMPD3/ADORA2A/CLEC5A/C1QTNF12/S100A8/FGFR1/KMO/MPC2/RAB3GAP1/C…
GO_REGULATION_OF_LYMPHOCYTE_DIFFERENTIATION	GO_REGULATION_OF_LYMPHOCYTE_DIFFERENTIATION	156	0.633315	1.7946	1.83455e-05	0.000848432	0.000667855	1466	tags=19%, list=10%, signal=18%	3552/3553/3559/51561/8808/114548/941/8651/4323/441478/639/8784/558/80149/10892/3659/101/3458/4860/64332/57178/6935/7494/25/54542/4773/8546/10125/3902/9308	IL1A/IL1B/IL2RA/IL23A/IL1RL2/NLRP3/CD80/SOCS1/MMP14/NRARP/PRDM1/TNFRSF18/AXL/ZC3H12A/MALT1/IRF1/ADAM8/IFNG/PNP/NFKBIZ/ZMIZ1/ZEB1/XBP1/ABL1/RC3H2/NFATC2/AP3B1/RASGRP1/LAG3/CD83
GO_INTERLEUKIN_6_PRODUCTION	GO_INTERLEUKIN_6_PRODUCTION	118	0.667229	1.84208	1.94447e-05	0.000886254	0.000697627	1111	tags=19%, list=7%, signal=18%	3552/3553/2069/671/8808/64135/7124/7098/3586/84868/23586/7128/136/80149/148022/3458/4155/64343/6774/55829/7494/5004/4615	IL1A/IL1B/EREG/BPI/IL1RL2/IFIH1/TNF/TLR3/IL10/HAVCR2/DDX58/TNFAIP3/ADORA2B/ZC3H12A/TICAM1/IFNG/MBP/AZI2/STAT3/SELENOS/XBP1/ORM1/MYD88
GO_NEUROINFLAMMATORY_RESPONSE	GO_NEUROINFLAMMATORY_RESPONSE	54	0.774217	1.94516	1.95427e-05	0.000886254	0.000697627	367	tags=17%, list=2%, signal=16%	3553/5743/6348/8530/7124/7098/8877/7133/10135	IL1B/PTGS2/CCL3/CST7/TNF/TLR3/SPHK1/TNFRSF1B/NAMPT
GO_ADAPTIVE_IMMUNE_RESPONSE	GO_ADAPTIVE_IMMUNE_RESPONSE	357	0.548471	1.63407	1.9987e-05	0.000897686	0.000706626	1483	tags=18%, list=10%, signal=17%	3553/29126/27074/718/3554/384/51561/970/9173/3383/127544/1514/114548/941/7124/10538/3586/4791/84868/84174/64092/639/7133/1880/7128/3665/23180/56957/6890/80149/10892/3659/1604/7037/3458/4683/10148/3903/6774/214/64332/6830/163486/4049/5971/255231/7855/54900/54542/53833/4734/7040/81545/3105/55183/64005/8772/4068/7186/57823/3702/3902/5873/3140	IL1B/CD274/LAMP3/C3/IL1R1/ARG2/IL23A/CD70/IL1RL1/ICAM1/RNF19B/CTSL/NLRP3/CD80/TNF/BATF/IL10/NFKB2/HAVCR2/SLA2/NA/PRDM1/TNFRSF1B/GPR183/TNFAIP3/IRF7/RFTN1/OTUD7B/TAP1/ZC3H12A/MALT1/IRF1/CD55/TFRC/IFNG/NBN/EBI3/LAIR1/STAT3/ALCAM/NFKBIZ/SUPT6H/DENND1B/LTA/RELB/MCOLN2/FZD5/LAX1/RC3H2/IL20RB/NEDD4/TGFB1/FBXO38/HLA-A/RIF1/MYO1G/FADD/SH2D1A/TRAF2/SLAMF7/ITK/LAG3/RAB27A/MR1
GO_T_CELL_DIFFERENTIATION	GO_T_CELL_DIFFERENTIATION	226	0.605464	1.76164	2.02461e-05	0.000900661	0.000708968	1857	tags=22%, list=12%, signal=20%	3552/3553/3559/51561/7471/1514/8808/114548/941/8651/1236/441478/10538/639/1880/8784/3714/944/80149/10892/3659/101/3458/4860/6774/64332/3955/57178/6935/5971/7855/7494/25/54542/4773/8546/8772/10125/3702/3902/9308/3140/161882/246778/864/925/6868/602/861/3566	IL1A/IL1B/IL2RA/IL23A/WNT1/CTSL/IL1RL2/NLRP3/CD80/SOCS1/CCR7/NRARP/BATF/PRDM1/GPR183/TNFRSF18/JAG2/TNFSF8/ZC3H12A/MALT1/IRF1/ADAM8/IFNG/PNP/STAT3/NFKBIZ/LFNG/ZMIZ1/ZEB1/RELB/FZD5/XBP1/ABL1/RC3H2/NFATC2/AP3B1/FADD/RASGRP1/ITK/LAG3/CD83/MR1/ZFPM1/IL27/RUNX3/CD8A/ADAM17/BCL3/NA/IL4R
GO_POSITIVE_REGULATION_OF_DEFENSE_RESPONSE	GO_POSITIVE_REGULATION_OF_DEFENSE_RESPONSE	308	0.557187	1.64953	2.10849e-05	0.000927337	0.000729966	2725	tags=30%, list=18%, signal=25%	3553/5743/6348/2069/718/51561/9173/4790/7124/7098/1236/10318/84868/6714/5359/79132/3665/136/115362/4582/10133/148022/10892/83666/101/3458/6774/64332/3428/5716/23118/2358/4049/257397/5971/6845/4792/3949/4615/5063/4363/85363/7474/8772/4068/27250/10125/3093/5469/7941/3902/56670/23291/5008/6279/9491/115004/23705/5695/5704/5713/94025/8737/2547/7097/2534/3845/55269/923/5689/5138/7292/4067/3133/2867/597…	IL1B/PTGS2/CCL3/EREG/C3/IL23A/IL1RL1/NFKB1/TNF/TLR3/CCR7/TNIP1/HAVCR2/SRC/PLSCR1/DHX58/IRF7/ADORA2B/GBP5/MUC1/OPTN/TICAM1/MALT1/PARP9/ADAM8/IFNG/STAT3/NFKBIZ/IFI16/PSMD10/TAB2/FPR2/LTA/TAB3/RELB/VAMP7/NFKBIA/LDLR/MYD88/PAK3/ABCC1/TRIM5/WNT5A/FADD/SH2D1A/PDCD4/RASGRP1/UBE2K/MED1/PLA2G7/LAG3/SUCNR1/FBXW11/OSM/S100A8/PSMF1/CGAS/CADM1/PSMB7/PSMC4/PSMD7/MUC16/RIPK1/XRCC6/TLR2/FYN/KRAS/PSPC1/CD6/PSMB1/…
GO_CYTOKINE_METABOLIC_PROCESS	GO_CYTOKINE_METABOLIC_PROCESS	56	0.775424	1.95849	2.12428e-05	0.000927337	0.000729966	1313	tags=29%, list=9%, signal=26%	3553/2069/1991/941/7057/1053/7124/7098/3586/148022/3458/6774/9966/3625/5663/7474	IL1B/EREG/ELANE/CD80/THBS1/CEBPE/TNF/TLR3/IL10/TICAM1/IFNG/STAT3/TNFSF15/INHBB/PSEN1/WNT5A
GO_REGULATION_OF_LYMPHOCYTE_MIGRATION	GO_REGULATION_OF_LYMPHOCYTE_MIGRATION	56	0.774673	1.9566	2.38288e-05	0.0010306	0.000811247	791	tags=20%, list=5%, signal=19%	6364/6348/6351/6354/6347/8740/84830/9943/101/58515/1398	CCL20/CCL3/CCL4/CCL7/CCL2/TNFSF14/ADTRP/OXSR1/ADAM8/SELENOK/CRK
GO_CELL_FATE_COMMITMENT	GO_CELL_FATE_COMMITMENT	151	0.636003	1.79733	2.50445e-05	0.00107324	0.000844814	2152	tags=28%, list=14%, signal=24%	84504/2596/51561/7490/7471/1514/100170841/10538/639/80326/23135/3714/5371/2624/7005/836/7046/6774/4851/79577/650/3688/2114/285590/324/5468/4853/28514/5663/7474/51507/161882/4779/2260/3516/6886/3398/440823/7483/9646/25925/6095	NKX6-2/GAP43/IL23A/WT1/WNT1/CTSL/EPOP/BATF/PRDM1/WNT10A/KDM6B/JAG2/PML/GATA2/TEAD3/CASP3/TGFBR1/STAT3/NOTCH1/CDC73/BMP2/ITGB1/ETS2/SH3PXD2B/APC/PPARG/NOTCH2/DLL1/PSEN1/WNT5A/RTF2/ZFPM1/NFE2L1/FGFR1/RBPJ/TAL1/ID2/MIAT/WNT9A/CTR9/ZNF521/RORA
GO_REACTIVE_OXYGEN_SPECIES_METABOLIC_PROCESS	GO_REACTIVE_OXYGEN_SPECIES_METABOLIC_PROCESS	226	0.599318	1.74376	2.89442e-05	0.00122908	0.000967486	1206	tags=15%, list=8%, signal=14%	3553/5743/8288/10394/6648/384/1906/3383/664/7057/7124/3586/4780/329/3099/2643/5806/54541/80149/148022/378/3458/8837/6774/9263/2358/25824/83667/55829/5447/9644/575/285590/10516/7040	IL1B/PTGS2/EPX/PRG3/SOD2/ARG2/EDN1/ICAM1/BNIP3/THBS1/TNF/IL10/NFE2L2/BIRC2/HK2/GCH1/PTX3/DDIT4/ZC3H12A/TICAM1/ARF4/IFNG/CFLAR/STAT3/STK17A/FPR2/PRDX5/SESN2/SELENOS/POR/SH3PXD2A/ADGRB1/SH3PXD2B/FBLN5/TGFB1
GO_NEGATIVE_REGULATION_OF_CYTOKINE_PRODUCTION	GO_NEGATIVE_REGULATION_OF_CYTOKINE_PRODUCTION	229	0.594115	1.73042	3.03865e-05	0.0012787	0.00100654	1552	tags=22%, list=10%, signal=20%	8288/29126/9636/671/384/7293/51561/9173/1991/64135/114548/7057/4790/5552/7124/1236/3586/84868/23586/79132/7128/56957/490/558/80149/1992/3458/5966/5045/9111/57045/4157/51191/7706/7042/5971/55829/5004/54476/53833/3625/7040/8887/28514/27250/9308/7114/55353/64771/161882	EPX/CD274/ISG15/BPI/ARG2/TNFRSF4/IL23A/IL1RL1/ELANE/IFIH1/NLRP3/THBS1/NFKB1/SRGN/TNF/CCR7/IL10/HAVCR2/DDX58/DHX58/TNFAIP3/OTUD7B/ATP2B1/AXL/ZC3H12A/SERPINB1/IFNG/REL/FURIN/NMI/TWSG1/MC1R/HERC5/TRIM25/TGFB2/RELB/SELENOS/ORM1/RNF216/IL20RB/INHBB/TGFB1/TAX1BP1/DLL1/PDCD4/CD83/TMSB4X/LAPTM4B/ILRUN/ZFPM1
GO_REGULATION_OF_SYSTEM_PROCESS	GO_REGULATION_OF_SYSTEM_PROCESS	413	0.527403	1.57836	3.12409e-05	0.00129881	0.00102238	594	tags=10%, list=4%, signal=10%	3553/5743/9464/6348/400746/8013/3269/10203/491/6547/8530/1906/9732/654/3383/6752/338442/5142/3759/3586/9456/151/6714/8877/7133/1193/2643/1889/56729/486/9150/136/1636/26251/57731/490/80149/551/9446/5144	IL1B/PTGS2/HAND2/CCL3/NCMAP/NR4A3/HRH1/CALCRL/ATP2B2/SLC8A3/CST7/EDN1/DOCK4/BMP6/ICAM1/SSTR2/HCAR2/PDE4B/KCNJ2/IL10/HOMER1/ADRA2B/SRC/SPHK1/TNFRSF1B/CLIC2/GCH1/ECE1/RETN/FXYD2/CTDP1/ADORA2B/ACE/KCNG2/SPTBN4/ATP2B1/ZC3H12A/AVP/GSTO1/PDE4D
GO_REGULATION_OF_CHEMOTAXIS	GO_REGULATION_OF_CHEMOTAXIS	173	0.611805	1.74727	3.14206e-05	0.00129881	0.00102238	1851	tags=25%, list=12%, signal=22%	6348/2152/6351/6354/3576/26585/6347/51561/1906/1991/7057/1233/1435/8740/1236/1880/7422/9943/4681/5641/57688/8482/4851/10512/65249/2358/659/10371/7040/4354/7474/9097/719/7941/56670/7114/2260/5747/285/6868/4856/65125/54910	CCL3/F3/CCL4/CCL7/CXCL8/GREM1/CCL2/IL23A/EDN1/ELANE/THBS1/CCR4/CSF1/TNFSF14/CCR7/GPR183/VEGFA/OXSR1/NA/LGMN/ZSWIM6/SEMA7A/NOTCH1/SEMA3C/ZSWIM4/FPR2/BMPR2/SEMA3A/TGFB1/MPP1/WNT5A/USP14/C3AR1/PLA2G7/SUCNR1/TMSB4X/FGFR1/PTK2/ANGPT2/ADAM17/CCN3/WNK1/SEMA4C
GO_NEGATIVE_REGULATION_OF_DEFENSE_RESPONSE	GO_NEGATIVE_REGULATION_OF_DEFENSE_RESPONSE	176	0.61972	1.77195	3.26057e-05	0.00133597	0.00105163	1826	tags=22%, list=12%, signal=20%	2853/7130/3559/10203/384/8530/5272/1991/114548/4790/3586/84868/284207/7133/79132/7128/10906/80149/5467/9111/1398/3428/103/2358/9021/55829/3949/53833/5468/3105/27250/5598/64771/135/388581/83737/5624/4856/54625	GPR31/TNFAIP6/IL2RA/CALCRL/ARG2/CST7/SERPINB9/ELANE/NLRP3/NFKB1/IL10/HAVCR2/METRNL/TNFRSF1B/DHX58/TNFAIP3/TRAFD1/ZC3H12A/PPARD/NMI/CRK/IFI16/ADAR/FPR2/SOCS3/SELENOS/LDLR/IL20RB/PPARG/HLA-A/PDCD4/MAPK7/ILRUN/ADORA2A/C1QTNF12/ITCH/PROC/CCN3/PARP14
GO_REGULATION_OF_GLIOGENESIS	GO_REGULATION_OF_GLIOGENESIS	92	0.703431	1.89142	3.31171e-05	0.00134513	0.00105884	1269	tags=20%, list=8%, signal=18%	84504/3553/6348/1435/7124/6497/7133/1880/3976/4851/2043/650/4049/3949/4763/7040/5468/5584	NKX6-2/IL1B/CCL3/CSF1/TNF/SKI/TNFRSF1B/GPR183/LIF/NOTCH1/EPHA4/BMP2/LTA/LDLR/NF1/TGFB1/PPARG/PRKCI
GO_REGULATION_OF_NITRIC_OXIDE_BIOSYNTHETIC_PROCESS	GO_REGULATION_OF_NITRIC_OXIDE_BIOSYNTHETIC_PROCESS	52	0.771473	1.92781	3.39096e-05	0.00136544	0.00107483	686	tags=19%, list=4%, signal=18%	3553/5743/1906/3383/7124/3586/5806/80149/148022/3458	IL1B/PTGS2/EDN1/ICAM1/TNF/IL10/PTX3/ZC3H12A/TICAM1/IFNG
GO_CYTOKINE_SECRETION	GO_CYTOKINE_SECRETION	95	0.702265	1.89467	3.43213e-05	0.00137021	0.00107858	1313	tags=26%, list=9%, signal=24%	3552/384/7293/9173/64135/114548/8651/5552/7124/3586/84868/23586/6714/5005/3685/80149/3458/6774/58515/24145/7855/5004/2597/3937/7474	IL1A/ARG2/TNFRSF4/IL1RL1/IFIH1/NLRP3/SOCS1/SRGN/TNF/IL10/HAVCR2/DDX58/SRC/ORM2/ITGAV/ZC3H12A/IFNG/STAT3/SELENOK/PANX1/FZD5/ORM1/GAPDH/LCP2/WNT5A
GO_REPRODUCTIVE_SYSTEM_DEVELOPMENT	GO_REPRODUCTIVE_SYSTEM_DEVELOPMENT	325	0.554443	1.64556	3.51967e-05	0.00139325	0.00109672	1790	tags=20%, list=12%, signal=18%	3696/2706/5743/10046/2069/4327/7490/654/3383/6615/4323/7098/10409/3586/595/6714/329/639/79805/7422/56729/5806/3976/4914/8743/558/2624/22846/8372/5872/5467/51493/836/682/54583/7046/4851/84159/3955/3157/9021/7042/7855/659/157506/3625/10371/22862/5798/5468/4853/92/7474/3205/5469/6696/50814/8894/8031/5324/5747/3516/10370/7421/2254	ITGB8/GJB2/PTGS2/MAMLD1/EREG/MMP19/WT1/BMP6/ICAM1/SNAI1/MMP14/TLR3/BASP1/IL10/CCND1/SRC/BIRC2/PRDM1/VASH2/VEGFA/RETN/PTX3/LIF/NTRK1/TNFSF10/AXL/GATA2/VASH1/HYAL3/RAB13/PPARD/RTCB/CASP3/BSG/EGLN1/TGFBR1/NOTCH1/ARID5B/LFNG/HMGCS1/SOCS3/TGFB2/FZD5/BMPR2/RDH10/INHBB/SEMA3A/FNDC3A/PTPRN/PPARG/NOTCH2/ACVR2A/WNT5A/HOXA9/MED1/SPP1/NSDHL/EIF2S2/NCOA4/PLAG1/PTK2/RBPJ/CITED2/VDR/FGF9
GO_FAT_SOLUBLE_VITAMIN_METABOLIC_PROCESS	GO_FAT_SOLUBLE_VITAMIN_METABOLIC_PROCESS	29	0.841629	1.92641	3.58299e-05	0.0014064	0.00110707	686	tags=28%, list=4%, signal=26%	3553/6615/4790/7124/8854/5641/5467/3458	IL1B/SNAI1/NFKB1/TNF/ALDH1A2/LGMN/PPARD/IFNG
GO_INTERLEUKIN_1_BETA_PRODUCTION	GO_INTERLEUKIN_1_BETA_PRODUCTION	76	0.721387	1.89478	3.63691e-05	0.00141567	0.00111436	1487	tags=28%, list=10%, signal=25%	3553/6348/114548/7124/1236/8877/5005/7128/115362/80149/10892/1992/3458/6774/24145/3428/7855/5004/7474/3140/56670	IL1B/CCL3/NLRP3/TNF/CCR7/SPHK1/ORM2/TNFAIP3/GBP5/ZC3H12A/MALT1/SERPINB1/IFNG/STAT3/PANX1/IFI16/FZD5/ORM1/WNT5A/MR1/SUCNR1
GO_REGULATION_OF_VIRAL_GENOME_REPLICATION	GO_REGULATION_OF_VIRAL_GENOME_REPLICATION	88	0.70535	1.88694	3.6817e-05	0.00142126	0.00111876	1137	tags=24%, list=7%, signal=22%	6355/6590/8638/3576/9636/24138/7124/4599/10318/5359/80149/3669/4851/55337/4939/5610/3428/103/2040/6780/26986	CCL8/SLPI/OASL/CXCL8/ISG15/IFIT5/TNF/MX1/TNIP1/PLSCR1/ZC3H12A/ISG20/NOTCH1/SHFL/OAS2/EIF2AK2/IFI16/ADAR/STOM/STAU1/PABPC1
GO_CELLULAR_RESPONSE_TO_MECHANICAL_STIMULUS	GO_CELLULAR_RESPONSE_TO_MECHANICAL_STIMULUS	71	0.730884	1.90308	3.75105e-05	0.00143616	0.00113049	1462	tags=25%, list=10%, signal=23%	3553/5743/654/664/4790/7098/3759/8740/355/6513/3659/2729/2805/50848/4615/6416/8772/8795	IL1B/PTGS2/BMP6/BNIP3/NFKB1/TLR3/KCNJ2/TNFSF14/FAS/SLC2A1/IRF1/GCLC/GOT1/F11R/MYD88/MAP2K4/FADD/TNFRSF10B
GO_NEGATIVE_REGULATION_OF_EXTRINSIC_APOPTOTIC_SIGNALING_PATHWAY	GO_NEGATIVE_REGULATION_OF_EXTRINSIC_APOPTOTIC_SIGNALING_PATHWAY	84	0.69421	1.84576	3.92132e-05	0.00147999	0.00116499	859	tags=19%, list=6%, signal=18%	3552/3553/356/3383/7057/7124/6714/355/7128/3685/8743/117584/8837/7046/64114/2729	IL1A/IL1B/FASLG/ICAM1/THBS1/TNF/SRC/FAS/TNFAIP3/ITGAV/TNFSF10/RFFL/CFLAR/TGFBR1/TMBIM1/GCLC
GO_REGULATION_OF_PEPTIDASE_ACTIVITY	GO_REGULATION_OF_PEPTIDASE_ACTIVITY	323	0.549181	1.62961	3.9289e-05	0.00147999	0.00116499	1462	tags=18%, list=10%, signal=17%	5743/6590/5055/2152/7980/27074/718/112399/8530/5272/356/5329/114548/7057/7124/8740/7035/6714/330/329/355/64065/960/7422/26355/7076/25816/8743/637/5371/10892/551/10010/5641/1992/23786/117584/4155/5045/8837/6774/2043/3428/9966/8301/25824/1509/1476/5447/135228/2597/5468/8772/9097/7186/6197/29843/444/8795	PTGS2/SLPI/SERPINB2/F3/TFPI2/LAMP3/C3/EGLN3/CST7/SERPINB9/FASLG/PLAUR/NLRP3/THBS1/TNF/TNFSF14/TFPI/SRC/BIRC3/BIRC2/FAS/PERP/CD44/VEGFA/FAM162A/TIMP1/TNFAIP8/TNFSF10/BID/PML/MALT1/AVP/TANK/LGMN/SERPINB1/BCL2L13/RFFL/MBP/FURIN/CFLAR/STAT3/EPHA4/IFI16/TNFSF15/PICALM/PRDX5/CTSD/CSTB/POR/CD109/GAPDH/PPARG/FADD/USP14/TRAF2/RPS6KA3/SENP1/ASPH/TNFRSF10B
GO_INTERLEUKIN_2_PRODUCTION	GO_INTERLEUKIN_2_PRODUCTION	50	0.770679	1.91484	4.43383e-05	0.00164056	0.00129139	704	tags=18%, list=5%, signal=17%	3552/3553/941/5142/84868/7128/10892/5144/4860	IL1A/IL1B/CD80/PDE4B/HAVCR2/TNFAIP3/MALT1/PDE4D/PNP
GO_MACROPHAGE_ACTIVATION	GO_MACROPHAGE_ACTIVATION	80	0.709081	1.87403	4.44484e-05	0.00164056	0.00129139	1108	tags=24%, list=7%, signal=22%	6348/671/8530/9173/7057/7124/7098/3586/84868/8877/22904/10135/79155/80149/148022/3458/7107/2358/3949	CCL3/BPI/CST7/IL1RL1/THBS1/TNF/TLR3/IL10/HAVCR2/SPHK1/SBNO2/NAMPT/TNIP2/ZC3H12A/TICAM1/IFNG/GPR137B/FPR2/LDLR
GO_REGULATION_OF_RESPONSE_TO_CYTOKINE_STIMULUS	GO_REGULATION_OF_RESPONSE_TO_CYTOKINE_STIMULUS	152	0.637673	1.80288	4.46053e-05	0.00164056	0.00129139	1517	tags=26%, list=10%, signal=24%	3557/3656/3554/1906/7185/11274/64135/8651/1435/7124/23586/330/329/8877/6772/7128/3665/558/3460/83666/117584/3458/5770/103/84888/9021/10555/8887/5468/837/1997/7474/8772/6880/7186/3093/3654/5469/5048/5598	IL1RN/IRAK2/IL1R1/EDN1/TRAF1/USP18/IFIH1/SOCS1/CSF1/TNF/DDX58/BIRC3/BIRC2/SPHK1/STAT1/TNFAIP3/IRF7/AXL/IFNGR2/PARP9/RFFL/IFNG/PTPN1/ADAR/SPPL2A/SOCS3/AGPAT2/TAX1BP1/PPARG/CASP4/ELF1/WNT5A/FADD/TAF9/TRAF2/UBE2K/IRAK1/MED1/PAFAH1B1/MAPK7
GO_NEGATIVE_REGULATION_OF_PROTEOLYSIS	GO_NEGATIVE_REGULATION_OF_PROTEOLYSIS	240	0.579276	1.6918	4.58047e-05	0.00167151	0.00131576	1433	tags=20%, list=9%, signal=19%	5743/6590/5055/7980/27074/718/8530/5272/7471/5329/7057/7124/8740/3586/7035/6737/6714/330/329/960/7422/9683/7076/25816/5371/551/1992/6386/117584/5045/23429/8837/64215/258010/2043/3428/8301/25824/27248/1476/5447/135228/2597/64844/5663/9097/6880/6197/29843	PTGS2/SLPI/SERPINB2/TFPI2/LAMP3/C3/CST7/SERPINB9/WNT1/PLAUR/THBS1/TNF/TNFSF14/IL10/TFPI/TRIM21/SRC/BIRC3/BIRC2/CD44/VEGFA/N4BP1/TIMP1/TNFAIP8/PML/AVP/SERPINB1/SDCBP/RFFL/FURIN/RYBP/CFLAR/DNAJC1/SVIP/EPHA4/IFI16/PICALM/PRDX5/ERLEC1/CSTB/POR/CD109/GAPDH/MARCHF7/PSEN1/USP14/TAF9/RPS6KA3/SENP1
GO_MUSCLE_CELL_PROLIFERATION	GO_MUSCLE_CELL_PROLIFERATION	156	0.622233	1.7632	4.63263e-05	0.00167744	0.00132042	2057	tags=27%, list=13%, signal=24%	5743/2069/5031/6648/8013/10203/1906/1991/7057/7124/3586/10135/6772/7128/5467/3458/8837/7046/6774/4851/2081/7042/9686/5468/2006/27250/3654/7049/7434/55512/3720/2773/2260/3516/2254/4856/196528/3398/8737/2547/60485/4331	PTGS2/EREG/P2RY6/SOD2/NR4A3/CALCRL/EDN1/ELANE/THBS1/TNF/IL10/NAMPT/STAT1/TNFAIP3/PPARD/IFNG/CFLAR/TGFBR1/STAT3/NOTCH1/ERN1/TGFB2/VGLL4/PPARG/ELN/PDCD4/IRAK1/TGFBR3/VIPR2/SMPD3/JARID2/GNAI3/FGFR1/RBPJ/FGF9/CCN3/ARID2/ID2/RIPK1/XRCC6/SAV1/MNAT1
GO_POSITIVE_REGULATION_OF_CHEMOTAXIS	GO_POSITIVE_REGULATION_OF_CHEMOTAXIS	110	0.67262	1.84405	5.07822e-05	0.00179451	0.00141257	1838	tags=25%, list=12%, signal=22%	6348/2152/6351/6354/3576/51561/1906/7057/1233/1435/8740/1236/7422/9943/5641/2358/659/7040/7474/719/7941/56670/7114/2260/5747/6868/65125	CCL3/F3/CCL4/CCL7/CXCL8/IL23A/EDN1/THBS1/CCR4/CSF1/TNFSF14/CCR7/VEGFA/OXSR1/LGMN/FPR2/BMPR2/TGFB1/WNT5A/C3AR1/PLA2G7/SUCNR1/TMSB4X/FGFR1/PTK2/ADAM17/WNK1
GO_NIK_NF_KAPPAB_SIGNALING	GO_NIK_NF_KAPPAB_SIGNALING	153	0.624127	1.76562	5.08886e-05	0.00179451	0.00141257	1883	tags=25%, list=12%, signal=22%	3553/26585/51561/1906/114548/7124/7098/8740/4791/84868/330/329/8877/80149/10892/10725/5966/3987/5610/9516/5716/9966/5971/4792/54542/27250/7186/3654/8795/7114/23291/81/9491/602/4856/5695/5704/5713	IL1B/GREM1/IL23A/EDN1/NLRP3/TNF/TLR3/TNFSF14/NFKB2/HAVCR2/BIRC3/BIRC2/SPHK1/ZC3H12A/MALT1/NFAT5/REL/LIMS1/EIF2AK2/LITAF/PSMD10/TNFSF15/RELB/NFKBIA/RC3H2/PDCD4/TRAF2/IRAK1/TNFRSF10B/TMSB4X/FBXW11/ACTN4/PSMF1/BCL3/CCN3/PSMB7/PSMC4/PSMD7
GO_POSITIVE_REGULATION_OF_TUMOR_NECROSIS_FACTOR_SUPERFAMILY_CYTOKINE_PRODUCTION	GO_POSITIVE_REGULATION_OF_TUMOR_NECROSIS_FACTOR_SUPERFAMILY_CYTOKINE_PRODUCTION	81	0.707507	1.87297	5.13379e-05	0.00179451	0.00141257	1359	tags=25%, list=9%, signal=23%	3552/6348/51561/64135/7057/7098/84868/23586/5005/148022/101/3458/6774/58515/7855/5004/5663/7474/8772/10125	IL1A/CCL3/IL23A/IFIH1/THBS1/TLR3/HAVCR2/DDX58/ORM2/TICAM1/ADAM8/IFNG/STAT3/SELENOK/FZD5/ORM1/PSEN1/WNT5A/FADD/RASGRP1
GO_REGULATION_OF_REACTIVE_OXYGEN_SPECIES_BIOSYNTHETIC_PROCESS	GO_REGULATION_OF_REACTIVE_OXYGEN_SPECIES_BIOSYNTHETIC_PROCESS	80	0.70705	1.86867	5.14481e-05	0.00179451	0.00141257	742	tags=16%, list=5%, signal=16%	3553/5743/384/1906/3383/7124/3586/5806/80149/148022/3458/8837/6774	IL1B/PTGS2/ARG2/EDN1/ICAM1/TNF/IL10/PTX3/ZC3H12A/TICAM1/IFNG/CFLAR/STAT3
GO_CELLULAR_ION_HOMEOSTASIS	GO_CELLULAR_ION_HOMEOSTASIS	488	0.509904	1.53301	5.14802e-05	0.00179451	0.00141257	1884	tags=21%, list=12%, signal=19%	51458/6355/6348/6354/23566/80045/9034/5031/4283/491/6547/1906/356/654/1991/664/64116/1233/23413/3759/2833/1236/151176/1193/6550/30001/57007/3685/2495/57214/490/5371/2769/2624/773/551/9446/23312/5144/245973/1604/57003/27/7037/3458/10663/54583/148867/58515/1182/4891/529/310/2907/27032/760/2696/3577/2358/2805/22821/51310/255231/7184/25/23315/4923/57053/7009/79572/23327/5663/55177/1317/55151/7474/114…	RHCG/CCL8/CCL3/CCL7/LPAR3/GPR157/CCRL2/P2RY6/CXCL9/ATP2B2/SLC8A3/EDN1/FASLG/BMP6/ELANE/BNIP3/SLC39A8/CCR4/NCS1/KCNJ2/CXCR3/CCR7/ERFE/CLIC2/SLC9A3/ERO1A/ACKR3/ITGAV/FTH1/CEMIP/ATP2B1/PML/GNA15/GATA2/CACNA1A/AVP/GSTO1/DMXL2/PDE4D/ATP6V1C2/CD55/CCDC47/ABL2/TFRC/IFNG/CXCR6/EGLN1/SLC30A7/SELENOK/CLCN3/SLC11A2/ATP6V1E1/ANXA7/GRINA/ATP2C1/CA2/GIPR/CXCR1/FPR2/GOT1/RASA3/SLC22A17/MCOLN2/HSP90B1/ABL1/SLC9A…
GO_PROGRAMMED_CELL_DEATH_INVOLVED_IN_CELL_DEVELOPMENT	GO_PROGRAMMED_CELL_DEATH_INVOLVED_IN_CELL_DEVELOPMENT	12	0.922418	1.82656	5.30962e-05	0.00182379	0.00143562	499	tags=33%, list=3%, signal=32%	3552/3553/356/4914	IL1A/IL1B/FASLG/NTRK1
GO_TUMOR_NECROSIS_FACTOR_SECRETION	GO_TUMOR_NECROSIS_FACTOR_SECRETION	31	0.846971	1.95854	5.31013e-05	0.00182379	0.00143562	1313	tags=39%, list=9%, signal=35%	3552/384/64135/84868/23586/5005/80149/3458/6774/7855/5004/7474	IL1A/ARG2/IFIH1/HAVCR2/DDX58/ORM2/ZC3H12A/IFNG/STAT3/FZD5/ORM1/WNT5A
GO_PEPTIDE_SECRETION	GO_PEPTIDE_SECRETION	412	0.523595	1.56682	5.3604e-05	0.00182762	0.00143864	1857	tags=20%, list=12%, signal=18%	3552/3553/3557/384/7293/1906/9173/55638/654/64135/114548/8651/5552/338442/7124/10815/3586/84868/6860/23586/6714/8111/10802/84830/5005/6513/3685/26251/10758/80149/773/5872/2182/5467/101/3458/6774/58515/24145/64215/780776/51030/26286/2696/6400/117247/2029/9024/7042/79158/7855/7494/5004/2821/5906/134957/43/6616/7009/3625/2597/7040/5798/3937/7474/3783/7186/64285/5048/56670/51762/55512/135/23601/38858…	IL1A/IL1B/IL1RN/ARG2/TNFRSF4/EDN1/IL1RL1/SYBU/BMP6/IFIH1/NLRP3/SOCS1/SRGN/HCAR2/TNF/CPLX1/IL10/HAVCR2/SYT4/DDX58/SRC/GPR68/SEC24A/ADTRP/ORM2/SLC2A1/ITGAV/KCNG2/TRAF3IP2/ZC3H12A/CACNA1A/RAB13/ACSL4/PPARD/ADAM8/IFNG/STAT3/SELENOK/PANX1/DNAJC1/TVP23A/TVP23B/ARFGAP3/GIPR/SEL1L/SLC16A10/ENSA/BRSK2/TGFB2/GNPTAB/FZD5/XBP1/ORM1/GPI/RAP1A/STXBP5/ACHE/SNAP25/TMBIM6/INHBB/GAPDH/TGFB1/PTPRN/LCP2/WNT5A/KCNN4/…
GO_T_CELL_MIGRATION	GO_T_CELL_MIGRATION	55	0.763344	1.92273	5.4059e-05	0.00182978	0.00144034	1321	tags=29%, list=9%, signal=27%	6364/6348/6347/3383/2838/2833/8740/1880/9943/101/58515/1398/50848/7474/64005/8772	CCL20/CCL3/CCL2/ICAM1/GPR15/CXCR3/TNFSF14/GPR183/OXSR1/ADAM8/SELENOK/CRK/F11R/WNT5A/MYO1G/FADD
GO_POSITIVE_REGULATION_OF_GTPASE_ACTIVITY	GO_POSITIVE_REGULATION_OF_GTPASE_ACTIVITY	346	0.536699	1.59705	5.87933e-05	0.00197571	0.00155521	1504	tags=18%, list=10%, signal=17%	6364/6355/414062/6348/6351/6354/5909/54453/5996/6367/6347/57514/9732/3383/1236/8412/375790/6004/5657/8787/4914/51735/26037/9754/285190/125058/116988/23603/1398/3987/10276/25780/26286/50807/253959/79658/8301/163486/2889/22821/50848/3688/116984/5906/134957/23161/93663/23365/4763/9693/5905/10483/57568/8394/7474/81565/10125/9605/9448/394/57522/10144/64786	CCL20/CCL8/CCL3L3/CCL3/CCL4/CCL7/RAP1GAP/RIN2/RGS1/CCL22/CCL2/ARHGAP31/DOCK4/ICAM1/CCR7/NA/AGRN/RGS16/PRTN3/RGS9/NTRK1/RAPGEF6/SIPA1L1/STARD8/RGPD4/TBC1D16/AGAP3/CORO1C/CRK/LIMS1/NET1/RASGRP3/ARFGAP3/ASAP1/RALGAPA1/ARHGAP10/PICALM/DENND1B/RAPGEF1/RASA3/F11R/ITGB1/ARAP2/RAP1A/STXBP5/SNX13/ARHGAP18/ARHGEF12/NF1/RAPGEF2/RANGAP1/SEC23B/SIPA1L2/PIP5K1A/WNT5A/NDEL1/RASGRP1/VPS9D1/MAP4K4/ARHGAP5/SRGAP1/…
GO_REGULATION_OF_VASOCONSTRICTION	GO_REGULATION_OF_VASOCONSTRICTION	37	0.814783	1.93519	6.02783e-05	0.00201114	0.0015831	583	tags=27%, list=4%, signal=26%	5743/3269/1906/9732/3383/151/1889/1636/490/551	PTGS2/HRH1/EDN1/DOCK4/ICAM1/ADRA2B/ECE1/ACE/ATP2B1/AVP
GO_REGULATION_OF_CYSTEINE_TYPE_ENDOPEPTIDASE_ACTIVITY	GO_REGULATION_OF_CYSTEINE_TYPE_ENDOPEPTIDASE_ACTIVITY	205	0.592814	1.71423	6.18106e-05	0.00204764	0.00161183	1462	tags=20%, list=10%, signal=19%	5743/2152/27074/112399/8530/5272/356/5329/114548/7057/7124/8740/6714/330/329/355/64065/960/7422/26355/25816/8743/637/5371/10892/551/5641/23786/117584/8837/3428/9966/25824/1509/5447/5468/8772/7186/6197/29843/444/8795	PTGS2/F3/LAMP3/EGLN3/CST7/SERPINB9/FASLG/PLAUR/NLRP3/THBS1/TNF/TNFSF14/SRC/BIRC3/BIRC2/FAS/PERP/CD44/VEGFA/FAM162A/TNFAIP8/TNFSF10/BID/PML/MALT1/AVP/LGMN/BCL2L13/RFFL/CFLAR/IFI16/TNFSF15/PRDX5/CTSD/POR/PPARG/FADD/TRAF2/RPS6KA3/SENP1/ASPH/TNFRSF10B
GO_POSITIVE_REGULATION_OF_T_CELL_PROLIFERATION	GO_POSITIVE_REGULATION_OF_T_CELL_PROLIFERATION	85	0.692426	1.84357	6.33748e-05	0.0020659	0.0016262	772	tags=16%, list=5%, signal=16%	3552/3553/3559/29126/51561/970/941/84868/6541/1604/7037/4860/10148/58515	IL1A/IL1B/IL2RA/CD274/IL23A/CD70/CD80/HAVCR2/SLC7A1/CD55/TFRC/PNP/EBI3/SELENOK
GO_RESPONSE_TO_CORTICOSTEROID	GO_RESPONSE_TO_CORTICOSTEROID	117	0.660106	1.821	6.34387e-05	0.0020659	0.0016262	992	tags=16%, list=6%, signal=15%	2706/5743/3557/1906/654/3383/6752/7124/3586/595/6714/54541/490/2908/8837/836/4851/2235/2805	GJB2/PTGS2/IL1RN/EDN1/BMP6/ICAM1/SSTR2/TNF/IL10/CCND1/SRC/DDIT4/ATP2B1/NR3C1/CFLAR/CASP3/NOTCH1/FECH/GOT1
GO_ACUTE_PHASE_RESPONSE	GO_ACUTE_PHASE_RESPONSE	29	0.832236	1.90491	6.36885e-05	0.0020659	0.0016262	403	tags=21%, list=3%, signal=20%	3552/3553/5743/7124/5359/5005	IL1A/IL1B/PTGS2/TNF/PLSCR1/ORM2
GO_REGULATION_OF_CYTOSOLIC_CALCIUM_ION_CONCENTRATION	GO_REGULATION_OF_CYTOSOLIC_CALCIUM_ION_CONCENTRATION	238	0.570331	1.66475	6.56437e-05	0.00208692	0.00164275	1397	tags=19%, list=9%, signal=17%	6348/23566/80045/9034/5031/4283/491/6547/1906/356/1233/23413/2833/1236/1193/30001/57007/3685/57214/490/5371/2769/2624/773/551/9446/5144/1604/27/10663/2696/3577/2358/2805/22821/255231/25/4923/57053/7009/55151/7474/114897/719/169200	CCL3/LPAR3/GPR157/CCRL2/P2RY6/CXCL9/ATP2B2/SLC8A3/EDN1/FASLG/CCR4/NCS1/CXCR3/CCR7/CLIC2/ERO1A/ACKR3/ITGAV/CEMIP/ATP2B1/PML/GNA15/GATA2/CACNA1A/AVP/GSTO1/PDE4D/CD55/ABL2/CXCR6/GIPR/CXCR1/FPR2/GOT1/RASA3/MCOLN2/ABL1/NTSR1/CHRNA10/TMBIM6/TMEM38B/WNT5A/C1QTNF1/C3AR1/TMEM64
GO_NEGATIVE_REGULATION_OF_TRANSPORT	GO_NEGATIVE_REGULATION_OF_TRANSPORT	346	0.533439	1.58735	6.57784e-05	0.00208692	0.00164275	1213	tags=15%, list=8%, signal=14%	3553/5743/3589/255057/2669/384/7293/1906/3383/7057/4790/285966/5552/7124/6860/151/3638/7133/1193/84830/3685/3976/9943/5657/80149/9446/6386/54602/9711/4851/258010/6536/124935/6721/2729/10105/8301/27248/8682/55829/5906/4923/3998/7009/4734/3625/4763/23327/5905/4043/11252	IL1B/PTGS2/IL11/CBARP/GEM/ARG2/TNFRSF4/EDN1/ICAM1/THBS1/NFKB1/TCAF2/SRGN/TNF/SYT4/ADRA2B/INSIG1/TNFRSF1B/CLIC2/ADTRP/ITGAV/LIF/OXSR1/PRTN3/ZC3H12A/GSTO1/SDCBP/NDFIP2/RUBCN/NOTCH1/SVIP/SLC6A9/SLC43A2/SREBF2/GCLC/PPIF/PICALM/ERLEC1/PEA15/SELENOS/RAP1A/NTSR1/LMAN1/TMBIM6/NEDD4/INHBB/NF1/NEDD4L/RANGAP1/LRPAP1/PACSIN2
GO_RESPONSE_TO_OXYGEN_LEVELS	GO_RESPONSE_TO_OXYGEN_LEVELS	329	0.54303	1.6127	6.59896e-05	0.00208692	0.00164275	1883	tags=21%, list=12%, signal=19%	5743/29923/6547/112399/51129/1906/3383/664/7057/205/4323/9915/4780/5328/6714/329/355/5352/10135/3099/7422/26355/3939/30001/6513/5230/54541/84069/5371/211/5467/101/5034/8837/836/54583/4851/4891/665/25994/9361/5716/650/7042/5163/4049/7184/6517/7009/4763/5468/2023/3654/7049/571/147007/5315/112398/81/9491/523/285/3516/10370/6868/23576/5695/5704/9978/5713	PTGS2/HILPDA/SLC8A3/EGLN3/ANGPTL4/EDN1/ICAM1/BNIP3/THBS1/AK4/MMP14/ARNT2/NFE2L2/PLAU/SRC/BIRC2/FAS/PLOD2/NAMPT/HK2/VEGFA/FAM162A/LDHA/ERO1A/SLC2A1/PGK1/DDIT4/PLEKHN1/PML/ALAS1/PPARD/ADAM8/P4HB/CFLAR/CASP3/EGLN1/NOTCH1/SLC11A2/BNIP3L/HIGD1A/LONP1/PSMD10/BMP2/TGFB2/PDK1/LTA/HSP90B1/SLC2A4/TMBIM6/NF1/PPARG/ENO1/IRAK1/TGFBR3/NA/TMEM199/PKM/EGLN2/ACTN4/PSMF1/ATP6V1A/ANGPT2/RBPJ/CITED2/ADAM17/DDAH1/PSM…
GO_OVULATION	GO_OVULATION	16	0.909449	1.88939	6.61237e-05	0.00208692	0.00164275	84	tags=25%, list=1%, signal=25%	5743/7130/2069/4327	PTGS2/TNFAIP6/EREG/MMP19
GO_NEGATIVE_REGULATION_OF_HYDROLASE_ACTIVITY	GO_NEGATIVE_REGULATION_OF_HYDROLASE_ACTIVITY	321	0.539032	1.5991	6.73066e-05	0.00210999	0.00166091	1188	tags=16%, list=8%, signal=15%	5743/6590/5055/7980/27074/10842/718/51129/8530/5272/5329/7057/7124/8740/7035/6714/330/329/960/7422/7076/5806/25816/551/4642/1992/117584/11153/5045/84930/8837/54583/116224/5514/54843/3428/10105/51400/5511/8301/2029/50848/7042/25824/1476/5447/25/135228/7009/2597	PTGS2/SLPI/SERPINB2/TFPI2/LAMP3/PPP1R17/C3/ANGPTL4/CST7/SERPINB9/PLAUR/THBS1/TNF/TNFSF14/TFPI/SRC/BIRC3/BIRC2/CD44/VEGFA/TIMP1/PTX3/TNFAIP8/AVP/MYO1D/SERPINB1/RFFL/FICD/FURIN/MASTL/CFLAR/EGLN1/FAM122A/PPP1R10/SYTL2/IFI16/PPIF/PPME1/PPP1R8/PICALM/ENSA/F11R/TGFB2/PRDX5/CSTB/POR/ABL1/CD109/TMBIM6/GAPDH
GO_CELLULAR_RESPONSE_TO_OXYGEN_LEVELS	GO_CELLULAR_RESPONSE_TO_OXYGEN_LEVELS	193	0.590693	1.70079	7.21256e-05	0.00223131	0.00175641	2881	tags=33%, list=19%, signal=27%	5743/29923/6547/112399/1906/3383/664/205/4780/6714/355/10135/7422/26355/30001/5230/5467/101/5034/8837/54583/4851/665/25994/5716/5163/6517/7009/5468/2023/3654/571/147007/112398/9491/523/3516/10370/23576/5695/5704/9978/5713/2782/10397/6095/5689/538/4000/5684/8453/5718/26608/2034/5711/10213/4976/5690/23545/80315/5687/29904/5366	PTGS2/HILPDA/SLC8A3/EGLN3/EDN1/ICAM1/BNIP3/AK4/NFE2L2/SRC/FAS/NAMPT/VEGFA/FAM162A/ERO1A/PGK1/PPARD/ADAM8/P4HB/CFLAR/EGLN1/NOTCH1/BNIP3L/HIGD1A/PSMD10/PDK1/SLC2A4/TMBIM6/PPARG/ENO1/IRAK1/NA/TMEM199/EGLN2/PSMF1/ATP6V1A/RBPJ/CITED2/DDAH1/PSMB7/PSMC4/RBX1/PSMD7/GNB1/NDRG1/RORA/PSMB1/ATP7A/LMNA/PSMA3/CUL2/PSMD12/TBL2/EPAS1/PSMD5/PSMD14/OPA1/PSMB2/ATP6V0A2/CPEB4/PSMA6/EEF2K/PMAIP1
GO_REACTIVE_NITROGEN_SPECIES_METABOLIC_PROCESS	GO_REACTIVE_NITROGEN_SPECIES_METABOLIC_PROCESS	69	0.731436	1.89756	7.21319e-05	0.00223131	0.00175641	1061	tags=20%, list=7%, signal=19%	3553/5743/384/1906/3383/7124/3586/2643/5806/80149/148022/3458/55829/5447	IL1B/PTGS2/ARG2/EDN1/ICAM1/TNF/IL10/GCH1/PTX3/ZC3H12A/TICAM1/IFNG/SELENOS/POR
GO_GLIAL_CELL_DIFFERENTIATION	GO_GLIAL_CELL_DIFFERENTIATION	179	0.607647	1.73907	7.41511e-05	0.00227868	0.0017937	2398	tags=30%, list=16%, signal=25%	84504/3553/2596/400746/80045/56978/92737/6547/3908/664/7124/6497/9334/7133/3976/4664/3458/6774/4851/1267/2043/2358/650/25/3949/7431/4763/7040/5468/28514/5663/4779/135/9948/6279/54413/6886/3398/8892/5453/7097/2817/10397/3845/9968/57721/2934/4152/351/79809/4067/5781/5970	NKX6-2/IL1B/GAP43/NCMAP/GPR157/PRDM8/DNER/SLC8A3/LAMA2/BNIP3/TNF/SKI/B4GALT5/TNFRSF1B/LIF/NAB1/IFNG/STAT3/NOTCH1/CNP/EPHA4/FPR2/BMP2/ABL1/LDLR/VIM/NF1/TGFB1/PPARG/DLL1/PSEN1/NFE2L1/ADORA2A/WDR1/S100A8/NLGN3/TAL1/ID2/EIF2B2/POU3F1/TLR2/GPC1/NDRG1/KRAS/MED12/METTL14/GSN/MBD1/APP/TTC21B/LYN/PTPN11/RELA
GO_ALPHA_BETA_T_CELL_DIFFERENTIATION	GO_ALPHA_BETA_T_CELL_DIFFERENTIATION	91	0.689721	1.85212	7.49489e-05	0.00228815	0.00180115	2480	tags=38%, list=16%, signal=32%	51561/1514/114548/941/8651/10538/639/1880/944/80149/10892/3659/3458/4860/6774/64332/5971/25/54542/8546/3702/9308/161882/246778/864/602/861/3566/6095/3718/7292/538/301/6304/5734	IL23A/CTSL/NLRP3/CD80/SOCS1/BATF/PRDM1/GPR183/TNFSF8/ZC3H12A/MALT1/IRF1/IFNG/PNP/STAT3/NFKBIZ/RELB/ABL1/RC3H2/AP3B1/ITK/CD83/ZFPM1/IL27/RUNX3/BCL3/NA/IL4R/RORA/JAK3/TNFSF4/ATP7A/ANXA1/SATB1/PTGER4
GO_DIVALENT_INORGANIC_CATION_TRANSPORT	GO_DIVALENT_INORGANIC_CATION_TRANSPORT	348	0.533947	1.58931	7.62106e-05	0.00231061	0.00181883	850	tags=11%, list=6%, signal=11%	6355/5743/6348/6351/23566/6947/255057/5031/4283/2669/10203/491/6347/6547/356/84102/3383/64116/23413/5142/3759/1236/9456/1193/30001/3685/57214/8787/490/5371/773/9446/5144/84061/148867/58515/24145/4891/80228/27032	CCL8/PTGS2/CCL3/CCL4/LPAR3/TCN1/CBARP/P2RY6/CXCL9/GEM/CALCRL/ATP2B2/CCL2/SLC8A3/FASLG/SLC41A2/ICAM1/SLC39A8/NCS1/PDE4B/KCNJ2/CCR7/HOMER1/CLIC2/ERO1A/ITGAV/CEMIP/RGS9/ATP2B1/PML/CACNA1A/GSTO1/PDE4D/MAGT1/SLC30A7/SELENOK/PANX1/SLC11A2/ORAI2/ATP2C1
GO_REGULATION_OF_NIK_NF_KAPPAB_SIGNALING	GO_REGULATION_OF_NIK_NF_KAPPAB_SIGNALING	96	0.680638	1.83885	7.7026e-05	0.00231061	0.00181883	1816	tags=30%, list=12%, signal=27%	3553/26585/51561/1906/114548/7124/7098/8740/84868/329/8877/80149/10892/10725/3987/5610/9516/9966/4792/54542/27250/7186/3654/8795/7114/23291/81/602/4856	IL1B/GREM1/IL23A/EDN1/NLRP3/TNF/TLR3/TNFSF14/HAVCR2/BIRC2/SPHK1/ZC3H12A/MALT1/NFAT5/LIMS1/EIF2AK2/LITAF/TNFSF15/NFKBIA/RC3H2/PDCD4/TRAF2/IRAK1/TNFRSF10B/TMSB4X/FBXW11/ACTN4/BCL3/CCN3
GO_T_CELL_PROLIFERATION	GO_T_CELL_PROLIFERATION	168	0.619099	1.76451	7.71687e-05	0.00231061	0.00181883	1359	tags=20%, list=9%, signal=18%	3552/3553/3559/29126/384/7293/51561/970/941/8740/3586/6385/84868/7133/944/10892/6541/3659/1604/7037/4860/10148/836/58515/57045/25/54542/53833/977/64844/3105/8772/10125	IL1A/IL1B/IL2RA/CD274/ARG2/TNFRSF4/IL23A/CD70/CD80/TNFSF14/IL10/SDC4/HAVCR2/TNFRSF1B/TNFSF8/MALT1/SLC7A1/IRF1/CD55/TFRC/PNP/EBI3/CASP3/SELENOK/TWSG1/ABL1/RC3H2/IL20RB/CD151/MARCHF7/HLA-A/FADD/RASGRP1
GO_POSITIVE_REGULATION_OF_DNA_BINDING_TRANSCRIPTION_FACTOR_ACTIVITY	GO_POSITIVE_REGULATION_OF_DNA_BINDING_TRANSCRIPTION_FACTOR_ACTIVITY	225	0.576088	1.67553	7.81991e-05	0.00232655	0.00183137	1403	tags=19%, list=9%, signal=17%	3553/26585/3656/1906/7185/7471/3383/114548/4790/7124/7098/3586/4791/23586/6737/8877/7422/2100/1491/4914/148022/10892/10211/101/7037/9175/55859/8837/6774/84159/5610/23118/7706/257397/4615/5468/5584/85363/7474/7186/28232/3654	IL1B/GREM1/IRAK2/EDN1/TRAF1/WNT1/ICAM1/NLRP3/NFKB1/TNF/TLR3/IL10/NFKB2/DDX58/TRIM21/SPHK1/VEGFA/ESR2/CTH/NTRK1/TICAM1/MALT1/FLOT1/ADAM8/TFRC/MAP3K13/BEX1/CFLAR/STAT3/ARID5B/EIF2AK2/TAB2/TRIM25/TAB3/MYD88/PPARG/PRKCI/TRIM5/WNT5A/TRAF2/SLCO3A1/IRAK1
GO_ALPHA_BETA_T_CELL_ACTIVATION	GO_ALPHA_BETA_T_CELL_ACTIVATION	129	0.644392	1.79472	8.01286e-05	0.00236887	0.00186469	1857	tags=27%, list=12%, signal=24%	29126/384/51561/1514/114548/941/8651/10538/639/1880/944/80149/10892/3659/1604/3458/4860/10148/6774/64332/57045/5971/25/54542/8546/3105/3702/9308/161882/246778/135/864/602/861/3566	CD274/ARG2/IL23A/CTSL/NLRP3/CD80/SOCS1/BATF/PRDM1/GPR183/TNFSF8/ZC3H12A/MALT1/IRF1/CD55/IFNG/PNP/EBI3/STAT3/NFKBIZ/TWSG1/RELB/ABL1/RC3H2/AP3B1/HLA-A/ITK/CD83/ZFPM1/IL27/ADORA2A/RUNX3/BCL3/NA/IL4R
GO_POSITIVE_REGULATION_OF_GLIOGENESIS	GO_POSITIVE_REGULATION_OF_GLIOGENESIS	59	0.737138	1.87448	8.36308e-05	0.00245685	0.00193394	1269	tags=22%, list=8%, signal=20%	84504/3553/6348/1435/7124/7133/3976/4851/650/4049/7040/5468/5584	NKX6-2/IL1B/CCL3/CSF1/TNF/TNFRSF1B/LIF/NOTCH1/BMP2/LTA/TGFB1/PPARG/PRKCI
GO_POSITIVE_REGULATION_OF_MITOTIC_NUCLEAR_DIVISION	GO_POSITIVE_REGULATION_OF_MITOTIC_NUCLEAR_DIVISION	49	0.761301	1.88599	8.47896e-05	0.00247533	0.00194849	359	tags=10%, list=2%, signal=10%	3552/3553/2069/1906/8877	IL1A/IL1B/EREG/EDN1/SPHK1
GO_POSITIVE_REGULATION_OF_NF_KAPPAB_TRANSCRIPTION_FACTOR_ACTIVITY	GO_POSITIVE_REGULATION_OF_NF_KAPPAB_TRANSCRIPTION_FACTOR_ACTIVITY	141	0.632283	1.77608	8.67812e-05	0.00251773	0.00198187	1403	tags=23%, list=9%, signal=21%	3553/26585/3656/7185/3383/114548/4790/7124/7098/4791/6737/8877/1491/4914/148022/10892/10211/101/7037/9175/8837/6774/5610/23118/7706/257397/4615/5584/85363/7474/7186/28232/3654	IL1B/GREM1/IRAK2/TRAF1/ICAM1/NLRP3/NFKB1/TNF/TLR3/NFKB2/TRIM21/SPHK1/CTH/NTRK1/TICAM1/MALT1/FLOT1/ADAM8/TFRC/MAP3K13/CFLAR/STAT3/EIF2AK2/TAB2/TRIM25/TAB3/MYD88/PRKCI/TRIM5/WNT5A/TRAF2/SLCO3A1/IRAK1
GO_DIVALENT_INORGANIC_CATION_HOMEOSTASIS	GO_DIVALENT_INORGANIC_CATION_HOMEOSTASIS	350	0.531726	1.58325	9.01158e-05	0.00259834	0.00204532	1461	tags=18%, list=10%, signal=17%	6355/6348/6354/23566/80045/9034/5031/4283/491/6547/1906/356/1991/664/64116/1233/23413/2833/1236/1193/30001/57007/3685/57214/8805/490/5371/2769/2624/773/551/9446/5144/1604/57003/27/10663/148867/58515/310/2907/27032/2696/3577/2358/2805/22821/255231/7184/25/4923/57053/7009/79572/5663/55177/55151/7474/114897/719/169200/10463/3061	CCL8/CCL3/CCL7/LPAR3/GPR157/CCRL2/P2RY6/CXCL9/ATP2B2/SLC8A3/EDN1/FASLG/ELANE/BNIP3/SLC39A8/CCR4/NCS1/CXCR3/CCR7/CLIC2/ERO1A/ACKR3/ITGAV/CEMIP/TRIM24/ATP2B1/PML/GNA15/GATA2/CACNA1A/AVP/GSTO1/PDE4D/CD55/CCDC47/ABL2/CXCR6/SLC30A7/SELENOK/ANXA7/GRINA/ATP2C1/GIPR/CXCR1/FPR2/GOT1/RASA3/MCOLN2/HSP90B1/ABL1/NTSR1/CHRNA10/TMBIM6/ATP13A3/PSEN1/RMDN3/TMEM38B/WNT5A/C1QTNF1/C3AR1/TMEM64/SLC30A9/HCRTR1
GO_REGULATION_OF_REACTIVE_OXYGEN_SPECIES_METABOLIC_PROCESS	GO_REGULATION_OF_REACTIVE_OXYGEN_SPECIES_METABOLIC_PROCESS	155	0.618241	1.75109	9.19022e-05	0.00263359	0.00207307	1206	tags=17%, list=8%, signal=16%	3553/5743/384/1906/3383/664/7057/7124/3586/4780/329/3099/2643/5806/80149/148022/378/3458/8837/6774/9263/2358/55829/575/10516/7040	IL1B/PTGS2/ARG2/EDN1/ICAM1/BNIP3/THBS1/TNF/IL10/NFE2L2/BIRC2/HK2/GCH1/PTX3/ZC3H12A/TICAM1/ARF4/IFNG/CFLAR/STAT3/STK17A/FPR2/SELENOS/ADGRB1/FBLN5/TGFB1
GO_ADAPTIVE_IMMUNE_RESPONSE_BASED_ON_SOMATIC_RECOMBINATION_OF_IMMUNE_RECEPTORS_BUILT_FROM_IMMUNOGLOBULIN_SUPERFAMILY_DOMAINS	GO_ADAPTIVE_IMMUNE_RESPONSE_BASED_ON_SOMATIC_RECOMBINATION_OF_IMMUNE_RECEPTORS_BUILT_FROM_IMMUNOGLOBULIN_SUPERFAMILY_DOMAINS	229	0.578575	1.68516	9.97719e-05	0.00283661	0.00223288	1483	tags=19%, list=10%, signal=18%	3553/29126/718/3554/51561/970/9173/3383/114548/941/7124/10538/3586/4791/84868/84174/7133/7128/3665/23180/80149/10892/1604/7037/4683/10148/6774/64332/6830/163486/4049/5971/7855/54542/53833/7040/81545/3105/55183/64005/8772/7186/5873/3140	IL1B/CD274/C3/IL1R1/IL23A/CD70/IL1RL1/ICAM1/NLRP3/CD80/TNF/BATF/IL10/NFKB2/HAVCR2/SLA2/TNFRSF1B/TNFAIP3/IRF7/RFTN1/ZC3H12A/MALT1/CD55/TFRC/NBN/EBI3/STAT3/NFKBIZ/SUPT6H/DENND1B/LTA/RELB/FZD5/RC3H2/IL20RB/TGFB1/FBXO38/HLA-A/RIF1/MYO1G/FADD/TRAF2/RAB27A/MR1
GO_REACTIVE_OXYGEN_SPECIES_BIOSYNTHETIC_PROCESS	GO_REACTIVE_OXYGEN_SPECIES_BIOSYNTHETIC_PROCESS	96	0.677978	1.83167	0.000100201	0.00283661	0.00223288	742	tags=15%, list=5%, signal=14%	3553/5743/384/1906/3383/7124/3586/2643/5806/80149/148022/3458/8837/6774	IL1B/PTGS2/ARG2/EDN1/ICAM1/TNF/IL10/GCH1/PTX3/ZC3H12A/TICAM1/IFNG/CFLAR/STAT3
GO_POSITIVE_REGULATION_OF_INTERLEUKIN_2_PRODUCTION	GO_POSITIVE_REGULATION_OF_INTERLEUKIN_2_PRODUCTION	26	0.83865	1.88642	0.000107951	0.00301635	0.00237436	594	tags=23%, list=4%, signal=22%	3552/3553/941/5142/10892/5144	IL1A/IL1B/CD80/PDE4B/MALT1/PDE4D
GO_REGULATION_OF_MACROPHAGE_ACTIVATION	GO_REGULATION_OF_MACROPHAGE_ACTIVATION	44	0.767297	1.87126	0.0001082	0.00301635	0.00237436	1313	tags=30%, list=9%, signal=27%	6348/671/8530/9173/7057/3586/84868/8877/79155/80149/7107/3949/7474	CCL3/BPI/CST7/IL1RL1/THBS1/IL10/HAVCR2/SPHK1/TNIP2/ZC3H12A/GPR137B/LDLR/WNT5A
GO_ENDOTHELIAL_CELL_PROLIFERATION	GO_ENDOTHELIAL_CELL_PROLIFERATION	121	0.65137	1.80315	0.000108488	0.00301635	0.00237436	1313	tags=23%, list=9%, signal=21%	2152/6347/2321/654/7057/7124/4323/8854/441478/3586/8828/79805/7422/6772/2624/22846/116844/57521/7046/6774/2081/650/7494/659/26051/4763/5468/7474	F3/CCL2/FLT1/BMP6/THBS1/TNF/MMP14/ALDH1A2/NRARP/IL10/NRP2/VASH2/VEGFA/STAT1/GATA2/VASH1/LRG1/RPTOR/TGFBR1/STAT3/ERN1/BMP2/XBP1/BMPR2/PPP1R16B/NF1/PPARG/WNT5A
GO_INTERLEUKIN_5_PRODUCTION	GO_INTERLEUKIN_5_PRODUCTION	12	0.913813	1.80952	0.000110562	0.00305584	0.00240545	594	tags=42%, list=4%, signal=40%	64109/8288/9173/114548/5144	CRLF2/EPX/IL1RL1/NLRP3/PDE4D
GO_HOMEOSTASIS_OF_NUMBER_OF_CELLS	GO_HOMEOSTASIS_OF_NUMBER_OF_CELLS	230	0.569656	1.65955	0.000116639	0.00320482	0.00252272	2659	tags=30%, list=17%, signal=26%	3559/23657/9636/1233/1435/338442/5142/8740/1236/5291/355/1880/7422/6498/6772/7128/558/2624/211/124976/836/669/6774/4851/4891/103/25/54542/53833/51542/92/23774/8772/5469/29843/6005/272/7049/161882/4779/26058/3658/6868/4856/6886/55904/6521/3398/3815/23376/29985/3845/2039/3718/9991/4067/1432/5781/301/116151/9258/9770/567/30061/9733/51301/2034/2149/91/1540	IL2RA/SLC7A11/ISG15/CCR4/CSF1/HCAR2/PDE4B/TNFSF14/CCR7/PIK3CB/FAS/GPR183/VEGFA/SKIL/STAT1/TNFAIP3/AXL/GATA2/ALAS1/SPNS2/CASP3/BPGM/STAT3/NOTCH1/SLC11A2/ADAR/ABL1/RC3H2/IL20RB/VPS54/ACVR2A/BRD1/FADD/MED1/SENP1/RHAG/AMPD3/TGFBR3/ZFPM1/NFE2L1/GIGYF2/IREB2/ADAM17/CCN3/TAL1/KMT2E/SLC4A1/ID2/KIT/UFL1/SLC39A3/KRAS/DMTN/JAK3/PTBP3/LYN/MAPK14/PTPN11/ANXA1/FAM210B/MFHAS1/RASSF2/B2M/SLC40A1/SART3/GCNT4/EPAS…
GO_CELLULAR_RESPONSE_TO_EXTERNAL_STIMULUS	GO_CELLULAR_RESPONSE_TO_EXTERNAL_STIMULUS	277	0.55204	1.62476	0.000122837	0.0033554	0.00264125	2832	tags=31%, list=18%, signal=25%	3553/5743/6506/654/3383/664/4790/7098/3759/8740/4780/355/10135/6513/136/8805/490/558/80149/3659/154743/57521/7486/30849/6721/2729/5610/3428/25994/9024/2805/50848/55626/83667/7494/659/4615/3920/3625/6416/5468/10670/8772/53349/5469/5571/8795/8658/58528/1965/3934/51422/54468/84557/476/7421/5599/26153/27327/8738/23710/29103/55062/8428/5138/5289/4929/4067/5781/56270/96459/9213/5734/143686/26608/22938/…	IL1B/PTGS2/SLC1A2/BMP6/ICAM1/BNIP3/NFKB1/TLR3/KCNJ2/TNFSF14/NFE2L2/FAS/NAMPT/SLC2A1/ADORA2B/TRIM24/ATP2B1/AXL/ZC3H12A/IRF1/BMT2/RPTOR/WRN/PIK3R4/SREBF2/GCLC/EIF2AK2/IFI16/HIGD1A/BRSK2/GOT1/F11R/AMBRA1/SESN2/XBP1/BMPR2/MYD88/LAMP2/INHBB/MAP2K4/PPARG/RRAGA/FADD/ZFYVE1/MED1/PRKAG1/TNFRSF10B/TNKS/RRAGD/EIF2S1/LCN2/PRKAG2/MIOS/MAP1LC3A/ATP1A1/VDR/MAPK8/KIF26A/TNRC6A/CRADD/GABARAPL1/DNAJC15/WIPI1/STK24…
GO_POSITIVE_REGULATION_OF_NITRIC_OXIDE_METABOLIC_PROCESS	GO_POSITIVE_REGULATION_OF_NITRIC_OXIDE_METABOLIC_PROCESS	37	0.804952	1.91184	0.00013078	0.00355158	0.00279568	686	tags=22%, list=4%, signal=21%	3553/5743/1906/3383/7124/5806/148022/3458	IL1B/PTGS2/EDN1/ICAM1/TNF/PTX3/TICAM1/IFNG
GO_REGULATION_OF_SMOOTH_MUSCLE_CONTRACTION	GO_REGULATION_OF_SMOOTH_MUSCLE_CONTRACTION	41	0.784489	1.8939	0.000133089	0.0035934	0.0028286	545	tags=20%, list=4%, signal=19%	5743/10203/1906/9732/151/8877/136/490	PTGS2/CALCRL/EDN1/DOCK4/ADRA2B/SPHK1/ADORA2B/ATP2B1
GO_ENDOTHELIAL_CELL_APOPTOTIC_PROCESS	GO_ENDOTHELIAL_CELL_APOPTOTIC_PROCESS	48	0.767587	1.89518	0.000137375	0.00368782	0.00290292	1517	tags=33%, list=10%, signal=30%	6347/51129/356/3383/7057/7124/3586/4780/7128/79155/2624/659/25/5584/27250/5598	CCL2/ANGPTL4/FASLG/ICAM1/THBS1/TNF/IL10/NFE2L2/TNFAIP3/TNIP2/GATA2/BMPR2/ABL1/PRKCI/PDCD4/MAPK7
GO_RESPONSE_TO_TYPE_I_INTERFERON	GO_RESPONSE_TO_TYPE_I_INTERFERON	79	0.702127	1.85271	0.000143117	0.00379864	0.00299015	1403	tags=30%, list=9%, signal=28%	3433/3437/8638/9636/11274/4599/4600/6772/3665/2634/3659/3669/55337/5770/4939/10379/103/4615/3430/3105/7474/8772/3093/3654	IFIT2/IFIT3/OASL/ISG15/USP18/MX1/MX2/STAT1/IRF7/GBP2/IRF1/ISG20/SHFL/PTPN1/OAS2/IRF9/ADAR/MYD88/IFI35/HLA-A/WNT5A/FADD/UBE2K/IRAK1
GO_REGULATION_OF_MEMBRANE_PROTEIN_ECTODOMAIN_PROTEOLYSIS	GO_REGULATION_OF_MEMBRANE_PROTEIN_ECTODOMAIN_PROTEOLYSIS	21	0.862775	1.87731	0.00014313	0.00379864	0.00299015	710	tags=38%, list=5%, signal=36%	3553/7124/3586/7133/7076/101/3458/5045	IL1B/TNF/IL10/TNFRSF1B/TIMP1/ADAM8/IFNG/FURIN
GO_LYMPHOCYTE_DIFFERENTIATION	GO_LYMPHOCYTE_DIFFERENTIATION	314	0.534736	1.58474	0.000145506	0.00383988	0.00302261	1809	tags=20%, list=12%, signal=18%	3552/3553/3589/3559/51561/7471/1514/8808/114548/941/8651/4323/1236/441478/10538/3586/639/1880/8784/3714/944/4914/558/80149/10892/3659/101/3458/4860/6774/64332/9452/3955/57178/6935/5971/3688/7855/7494/25/54542/4773/4189/8546/4853/28514/8772/10125/3702/3902/9308/3140/5795/161882/246778/864/925/5295/3516/6868/602/861	IL1A/IL1B/IL11/IL2RA/IL23A/WNT1/CTSL/IL1RL2/NLRP3/CD80/SOCS1/MMP14/CCR7/NRARP/BATF/IL10/PRDM1/GPR183/TNFRSF18/JAG2/TNFSF8/NTRK1/AXL/ZC3H12A/MALT1/IRF1/ADAM8/IFNG/PNP/STAT3/NFKBIZ/ITM2A/LFNG/ZMIZ1/ZEB1/RELB/ITGB1/FZD5/XBP1/ABL1/RC3H2/NFATC2/DNAJB9/AP3B1/NOTCH2/DLL1/FADD/RASGRP1/ITK/LAG3/CD83/MR1/PTPRJ/ZFPM1/IL27/RUNX3/CD8A/PIK3R1/RBPJ/ADAM17/BCL3/NA
GO_FAT_CELL_DIFFERENTIATION	GO_FAT_CELL_DIFFERENTIATION	187	0.591817	1.70011	0.000148094	0.00388621	0.00305909	1561	tags=20%, list=10%, signal=18%	5743/3589/8013/3914/7471/664/8651/7124/595/22809/284207/3638/57761/56729/30001/2869/80149/2624/5467/116844/168455/84159/114882/650/7494/94056/6517/3625/285590/7040/5468/7474/144404/169200/5469/161882/6239	PTGS2/IL11/NR4A3/LAMB3/WNT1/BNIP3/SOCS1/TNF/CCND1/ATF5/METRNL/INSIG1/TRIB3/RETN/ERO1A/GRK5/ZC3H12A/GATA2/PPARD/LRG1/CCDC71L/ARID5B/OSBPL8/BMP2/XBP1/SYAP1/SLC2A4/INHBB/SH3PXD2B/TGFB1/PPARG/WNT5A/TMEM120B/TMEM64/MED1/ZFPM1/RREB1
GO_MYELOID_LEUKOCYTE_DIFFERENTIATION	GO_MYELOID_LEUKOCYTE_DIFFERENTIATION	172	0.608615	1.73769	0.000155281	0.00404504	0.00318411	2489	tags=34%, list=16%, signal=29%	6348/51561/1435/1053/7124/7098/1236/10538/6714/22904/8111/1880/7422/3665/3976/5657/2624/7037/3458/6729/7107/760/3428/5971/9644/140685/135228/4763/7040/5468/4853/5663/27102/8772/54997/169200/5469/5048/161882/29887/3658/5295/3516/861/6886/3398/8737/7097/3815/55509/2194/11006/4627/351/4067/1432/10456/2150/9770	CCL3/IL23A/CSF1/CEBPE/TNF/TLR3/CCR7/BATF/SRC/SBNO2/GPR68/GPR183/VEGFA/IRF7/LIF/PRTN3/GATA2/TFRC/IFNG/SRP54/GPR137B/CA2/IFI16/RELB/SH3PXD2A/ZBTB46/CD109/NF1/TGFB1/PPARG/NOTCH2/PSEN1/EIF2AK1/FADD/TESC/TMEM64/MED1/PAFAH1B1/ZFPM1/SNX10/IREB2/PIK3R1/RBPJ/NA/TAL1/ID2/RIPK1/TLR2/KIT/BATF3/FASN/LILRB4/MYH9/APP/LYN/MAPK14/HAX1/F2RL1/RASSF2
GO_REGULATION_OF_PEPTIDE_SECRETION	GO_REGULATION_OF_PEPTIDE_SECRETION	315	0.531004	1.5738	0.000155878	0.00404504	0.00318411	1206	tags=16%, list=8%, signal=15%	3552/3553/384/7293/9173/55638/654/64135/8651/5552/338442/7124/3586/84868/6860/23586/6714/8111/10802/84830/5005/6513/26251/80149/773/2182/5467/101/3458/6774/58515/24145/64215/2696/2029/9024/7042/7855/7494/5004/2821/5906/134957/43/6616/7009/3625/2597/7040	IL1A/IL1B/ARG2/TNFRSF4/IL1RL1/SYBU/BMP6/IFIH1/SOCS1/SRGN/HCAR2/TNF/IL10/HAVCR2/SYT4/DDX58/SRC/GPR68/SEC24A/ADTRP/ORM2/SLC2A1/KCNG2/ZC3H12A/CACNA1A/ACSL4/PPARD/ADAM8/IFNG/STAT3/SELENOK/PANX1/DNAJC1/GIPR/ENSA/BRSK2/TGFB2/FZD5/XBP1/ORM1/GPI/RAP1A/STXBP5/ACHE/SNAP25/TMBIM6/INHBB/GAPDH/TGFB1
GO_METAL_ION_HOMEOSTASIS	GO_METAL_ION_HOMEOSTASIS	466	0.499308	1.49924	0.000162451	0.00419232	0.00330004	1789	tags=20%, list=12%, signal=18%	6355/6348/6354/23566/80045/9034/5031/4283/491/6547/1906/356/654/1991/664/64116/1233/23413/3759/2833/1236/151176/1193/30001/57007/3685/2495/57214/8805/490/5371/2769/2624/773/551/9446/5144/1604/57003/27/7037/3458/10663/54583/148867/58515/4891/310/2907/27032/2696/3577/8301/51312/2358/2805/22821/51310/255231/7184/25/4923/57053/7009/79572/23327/4241/5663/55177/1317/55151/27102/7474/114897/719/169200/1…	CCL8/CCL3/CCL7/LPAR3/GPR157/CCRL2/P2RY6/CXCL9/ATP2B2/SLC8A3/EDN1/FASLG/BMP6/ELANE/BNIP3/SLC39A8/CCR4/NCS1/KCNJ2/CXCR3/CCR7/ERFE/CLIC2/ERO1A/ACKR3/ITGAV/FTH1/CEMIP/TRIM24/ATP2B1/PML/GNA15/GATA2/CACNA1A/AVP/GSTO1/PDE4D/CD55/CCDC47/ABL2/TFRC/IFNG/CXCR6/EGLN1/SLC30A7/SELENOK/SLC11A2/ANXA7/GRINA/ATP2C1/GIPR/CXCR1/PICALM/SLC25A37/FPR2/GOT1/RASA3/SLC22A17/MCOLN2/HSP90B1/ABL1/NTSR1/CHRNA10/TMBIM6/ATP13A3…
GO_INTERLEUKIN_1_MEDIATED_SIGNALING_PATHWAY	GO_INTERLEUKIN_1_MEDIATED_SIGNALING_PATHWAY	96	0.672912	1.81798	0.00016919	0.00431852	0.00339938	1883	tags=24%, list=12%, signal=21%	3552/3553/3557/3656/3554/8808/4790/1326/79155/5716/23118/257397/4792/4615/8878/3654/54472/23291/9491/5695/5704/9978/5713	IL1A/IL1B/IL1RN/IRAK2/IL1R1/IL1RL2/NFKB1/MAP3K8/TNIP2/PSMD10/TAB2/TAB3/NFKBIA/MYD88/SQSTM1/IRAK1/TOLLIP/FBXW11/PSMF1/PSMB7/PSMC4/RBX1/PSMD7
GO_LEUKOCYTE_APOPTOTIC_PROCESS	GO_LEUKOCYTE_APOPTOTIC_PROCESS	96	0.671536	1.81426	0.00016919	0.00431852	0.00339938	725	tags=18%, list=5%, signal=17%	3559/29126/23657/8013/384/356/1514/338442/1236/3586/5291/355/3665/10758/558/101/836	IL2RA/CD274/SLC7A11/NR4A3/ARG2/FASLG/CTSL/HCAR2/CCR7/IL10/PIK3CB/FAS/IRF7/TRAF3IP2/AXL/ADAM8/CASP3
GO_EPITHELIAL_CELL_APOPTOTIC_PROCESS	GO_EPITHELIAL_CELL_APOPTOTIC_PROCESS	86	0.686502	1.83157	0.00017228	0.00437348	0.00344265	1739	tags=26%, list=11%, signal=23%	6347/51129/356/3383/7057/7124/3586/4780/7128/3714/637/79155/2624/8837/659/25/5584/27250/5598/1965/10640/10298	CCL2/ANGPTL4/FASLG/ICAM1/THBS1/TNF/IL10/NFE2L2/TNFAIP3/JAG2/BID/TNIP2/GATA2/CFLAR/BMPR2/ABL1/PRKCI/PDCD4/MAPK7/EIF2S1/EXOC5/PAK4
GO_PROTEIN_KINASE_B_SIGNALING	GO_PROTEIN_KINASE_B_SIGNALING	197	0.581749	1.67747	0.000174412	0.00440366	0.0034664	2434	tags=26%, list=16%, signal=22%	3553/6348/2152/2069/23551/6347/941/7057/7124/5979/1236/6714/5291/57761/84830/29851/4914/558/101/7046/114882/4157/118788/2889/83667/3688/7040/23533/114897/5795/10565/55512/5008/5154/388581/2260/5747/5295/2254/56005/5025/3815/2534/391/10016/92140/7295/5781/10456/9365/145957/9258	IL1B/CCL3/F3/EREG/RASD2/CCL2/CD80/THBS1/TNF/RET/CCR7/SRC/PIK3CB/TRIB3/ADTRP/ICOS/NTRK1/AXL/ADAM8/TGFBR1/OSBPL8/MC1R/PIK3AP1/RAPGEF1/SESN2/ITGB1/TGFB1/PIK3R5/C1QTNF1/PTPRJ/ARFGEF1/SMPD3/OSM/PDGFA/C1QTNF12/FGFR1/PTK2/PIK3R1/FGF9/MYDGF/P2RX4/KIT/FYN/RHOG/PDCD6/MTDH/TXN/PTPN11/HAX1/KL/NRG4/MFHAS1
GO_POSITIVE_REGULATION_OF_TUMOR_NECROSIS_FACTOR_SECRETION	GO_POSITIVE_REGULATION_OF_TUMOR_NECROSIS_FACTOR_SECRETION	23	0.855553	1.8894	0.000175777	0.00441427	0.00347475	1313	tags=43%, list=9%, signal=40%	3552/64135/84868/23586/5005/3458/6774/7855/5004/7474	IL1A/IFIH1/HAVCR2/DDX58/ORM2/IFNG/STAT3/FZD5/ORM1/WNT5A
GO_REGULATION_OF_TUBE_SIZE	GO_REGULATION_OF_TUBE_SIZE	90	0.678877	1.82078	0.000183181	0.00455554	0.00358595	859	tags=17%, list=6%, signal=16%	5743/6648/3269/1906/9732/3383/151/2643/1889/136/1636/490/551/5467/2729	PTGS2/SOD2/HRH1/EDN1/DOCK4/ICAM1/ADRA2B/GCH1/ECE1/ADORA2B/ACE/ATP2B1/AVP/PPARD/GCLC
GO_INTERACTION_WITH_SYMBIONT	GO_INTERACTION_WITH_SYMBIONT	69	0.720012	1.86792	0.000184109	0.00455554	0.00358595	1194	tags=19%, list=8%, signal=17%	6355/6348/6351/1511/1991/9150/5806/820/80149/2959/2040/2597/9367	CCL8/CCL3/CCL4/CTSG/ELANE/CTDP1/PTX3/CAMP/ZC3H12A/GTF2B/STOM/GAPDH/RAB9A
GO_INFLAMMATORY_RESPONSE_TO_ANTIGENIC_STIMULUS	GO_INFLAMMATORY_RESPONSE_TO_ANTIGENIC_STIMULUS	41	0.780035	1.88315	0.000185188	0.00455554	0.00358595	1359	tags=37%, list=9%, signal=33%	3557/3559/718/1991/3383/7124/1236/3586/23135/4851/4049/55829/53833/4853/10125	IL1RN/IL2RA/C3/ELANE/ICAM1/TNF/CCR7/IL10/KDM6B/NOTCH1/LTA/SELENOS/IL20RB/NOTCH2/RASGRP1
GO_REGULATION_OF_DNA_BINDING_TRANSCRIPTION_FACTOR_ACTIVITY	GO_REGULATION_OF_DNA_BINDING_TRANSCRIPTION_FACTOR_ACTIVITY	359	0.519989	1.54954	0.000185303	0.00455554	0.00358595	1403	tags=16%, list=9%, signal=15%	3553/9464/26585/3656/7293/1906/7185/7471/3383/114548/4790/7124/7098/3586/4791/84868/23586/6737/8877/7422/7128/2100/1491/4914/8323/80149/148022/10892/7187/10211/101/7037/9175/55859/8837/54583/6774/84159/9969/5610/5716/8553/23118/7706/257397/4792/4615/8887/5468/5584/9908/85363/7474/7186/28232/3654	IL1B/HAND2/GREM1/IRAK2/TNFRSF4/EDN1/TRAF1/WNT1/ICAM1/NLRP3/NFKB1/TNF/TLR3/IL10/NFKB2/HAVCR2/DDX58/TRIM21/SPHK1/VEGFA/TNFAIP3/ESR2/CTH/NTRK1/FZD6/ZC3H12A/TICAM1/MALT1/TRAF3/FLOT1/ADAM8/TFRC/MAP3K13/BEX1/CFLAR/EGLN1/STAT3/ARID5B/MED13/EIF2AK2/PSMD10/BHLHE40/TAB2/TRIM25/TAB3/NFKBIA/MYD88/TAX1BP1/PPARG/PRKCI/G3BP2/TRIM5/WNT5A/TRAF2/SLCO3A1/IRAK1
GO_RESPONSE_TO_MECHANICAL_STIMULUS	GO_RESPONSE_TO_MECHANICAL_STIMULUS	163	0.606851	1.72567	0.000189811	0.00463411	0.0036478	1321	tags=17%, list=9%, signal=16%	3553/5743/1906/654/664/7057/4790/4323/7098/3759/8740/6714/355/56729/6772/6513/4914/3659/25861/2729/2805/50848/4792/4615/57053/6416/5468/8772	IL1B/PTGS2/EDN1/BMP6/BNIP3/THBS1/NFKB1/MMP14/TLR3/KCNJ2/TNFSF14/SRC/FAS/RETN/STAT1/SLC2A1/NTRK1/IRF1/WHRN/GCLC/GOT1/F11R/NFKBIA/MYD88/CHRNA10/MAP2K4/PPARG/FADD
GO_POSITIVE_REGULATION_OF_INTERLEUKIN_6_PRODUCTION	GO_POSITIVE_REGULATION_OF_INTERLEUKIN_6_PRODUCTION	72	0.70943	1.85023	0.000190483	0.00463411	0.0036478	742	tags=18%, list=5%, signal=17%	3552/3553/2069/8808/64135/7124/7098/23586/136/148022/3458/4155/6774	IL1A/IL1B/EREG/IL1RL2/IFIH1/TNF/TLR3/DDX58/ADORA2B/TICAM1/IFNG/MBP/STAT3
GO_LYMPHOCYTE_MEDIATED_IMMUNITY	GO_LYMPHOCYTE_MEDIATED_IMMUNITY	223	0.567049	1.6483	0.000193632	0.00468629	0.00368888	1483	tags=19%, list=10%, signal=18%	3553/718/3554/51561/970/5272/3383/114548/80329/7124/10538/80328/3586/84868/84174/7133/3665/23180/10892/79465/1604/7037/4683/1398/6830/163486/4049/6845/7855/53833/7040/81545/3105/55183/64005/8772/4068/10125/7186/57823/3902/5873/3140	IL1B/C3/IL1R1/IL23A/CD70/SERPINB9/ICAM1/NLRP3/ULBP1/TNF/BATF/ULBP2/IL10/HAVCR2/SLA2/TNFRSF1B/IRF7/RFTN1/MALT1/ULBP3/CD55/TFRC/NBN/CRK/SUPT6H/DENND1B/LTA/VAMP7/FZD5/IL20RB/TGFB1/FBXO38/HLA-A/RIF1/MYO1G/FADD/SH2D1A/RASGRP1/TRAF2/SLAMF7/LAG3/RAB27A/MR1
GO_SMOOTH_MUSCLE_CELL_PROLIFERATION	GO_SMOOTH_MUSCLE_CELL_PROLIFERATION	116	0.644097	1.77523	0.000199378	0.0048005	0.00377878	686	tags=14%, list=4%, signal=13%	5743/2069/5031/6648/8013/10203/1906/1991/7057/7124/3586/10135/6772/7128/5467/3458	PTGS2/EREG/P2RY6/SOD2/NR4A3/CALCRL/EDN1/ELANE/THBS1/TNF/IL10/NAMPT/STAT1/TNFAIP3/PPARD/IFNG
GO_UNSATURATED_FATTY_ACID_BIOSYNTHETIC_PROCESS	GO_UNSATURATED_FATTY_ACID_BIOSYNTHETIC_PROCESS	47	0.757587	1.86591	0.00020451	0.0048988	0.00385616	621	tags=15%, list=4%, signal=14%	3553/5743/1906/79993/241/551/8560	IL1B/PTGS2/EDN1/ELOVL7/ALOX5AP/AVP/DEGS1
GO_POSITIVE_REGULATION_OF_INTERLEUKIN_8_PRODUCTION	GO_POSITIVE_REGULATION_OF_INTERLEUKIN_8_PRODUCTION	45	0.762477	1.86623	0.000206018	0.00490976	0.00386478	742	tags=20%, list=5%, signal=19%	3553/2152/10394/1991/7124/7098/23586/965/6774	IL1B/F3/PRG3/ELANE/TNF/TLR3/DDX58/CD58/STAT3
GO_POSITIVE_REGULATION_OF_ANIMAL_ORGAN_MORPHOGENESIS	GO_POSITIVE_REGULATION_OF_ANIMAL_ORGAN_MORPHOGENESIS	51	0.753768	1.87799	0.000215366	0.00510648	0.00401964	1789	tags=41%, list=12%, signal=36%	9464/26585/1906/7490/1435/10409/7422/7128/3976/8837/7046/4851/10512/650/7042/7494/7474/5469/2260/3516/7421	HAND2/GREM1/EDN1/WT1/CSF1/BASP1/VEGFA/TNFAIP3/LIF/CFLAR/TGFBR1/NOTCH1/SEMA3C/BMP2/TGFB2/XBP1/WNT5A/MED1/FGFR1/RBPJ/VDR
GO_POSITIVE_REGULATION_OF_REACTIVE_OXYGEN_SPECIES_BIOSYNTHETIC_PROCESS	GO_POSITIVE_REGULATION_OF_REACTIVE_OXYGEN_SPECIES_BIOSYNTHETIC_PROCESS	46	0.758325	1.86194	0.000218923	0.0051646	0.00406538	686	tags=17%, list=4%, signal=17%	3553/5743/1906/3383/7124/5806/148022/3458	IL1B/PTGS2/EDN1/ICAM1/TNF/PTX3/TICAM1/IFNG
GO_POSITIVE_REGULATION_OF_VASCULAR_ENDOTHELIAL_GROWTH_FACTOR_PRODUCTION	GO_POSITIVE_REGULATION_OF_VASCULAR_ENDOTHELIAL_GROWTH_FACTOR_PRODUCTION	22	0.854872	1.8727	0.000222931	0.00523273	0.00411901	450	tags=23%, list=3%, signal=22%	3552/3553/5743/718/136	IL1A/IL1B/PTGS2/C3/ADORA2B
GO_NEGATIVE_REGULATION_OF_BLOOD_VESSEL_DIAMETER	GO_NEGATIVE_REGULATION_OF_BLOOD_VESSEL_DIAMETER	50	0.752459	1.86957	0.000229562	0.00536143	0.00422032	583	tags=20%, list=4%, signal=19%	5743/3269/1906/9732/3383/151/1889/1636/490/551	PTGS2/HRH1/EDN1/DOCK4/ICAM1/ADRA2B/ECE1/ACE/ATP2B1/AVP
GO_CYTOKINE_PRODUCTION_INVOLVED_IN_IMMUNE_RESPONSE	GO_CYTOKINE_PRODUCTION_INVOLVED_IN_IMMUNE_RESPONSE	93	0.665903	1.7923	0.000230801	0.00536354	0.00422198	1483	tags=24%, list=10%, signal=21%	3553/8013/3554/8140/114548/7124/7098/3586/23586/7133/148022/10892/1604/8482/163486/7042/7855/7040/3105/7474/7186/3140	IL1B/NR4A3/IL1R1/SLC7A5/NLRP3/TNF/TLR3/IL10/DDX58/TNFRSF1B/TICAM1/MALT1/CD55/SEMA7A/DENND1B/TGFB2/FZD5/TGFB1/HLA-A/WNT5A/TRAF2/MR1
GO_CALCIUM_MEDIATED_SIGNALING	GO_CALCIUM_MEDIATED_SIGNALING	166	0.608182	1.73176	0.000233653	0.0053997	0.00425045	971	tags=14%, list=6%, signal=13%	6364/6348/6351/3576/9034/5031/1906/1233/7124/2833/1236/84174/8877/1193/57007/9446/5144/10725/10663/55784/58515/3577/2358	CCL20/CCL3/CCL4/CXCL8/CCRL2/P2RY6/EDN1/CCR4/TNF/CXCR3/CCR7/SLA2/SPHK1/CLIC2/ACKR3/GSTO1/PDE4D/NFAT5/CXCR6/MCTP2/SELENOK/CXCR1/FPR2
GO_VASCULAR_ENDOTHELIAL_GROWTH_FACTOR_PRODUCTION	GO_VASCULAR_ENDOTHELIAL_GROWTH_FACTOR_PRODUCTION	30	0.815262	1.8759	0.000235814	0.0053997	0.00425045	450	tags=20%, list=3%, signal=19%	3552/3553/5743/718/7124/136	IL1A/IL1B/PTGS2/C3/TNF/ADORA2B
GO_FAT_SOLUBLE_VITAMIN_BIOSYNTHETIC_PROCESS	GO_FAT_SOLUBLE_VITAMIN_BIOSYNTHETIC_PROCESS	13	0.905633	1.81615	0.000235825	0.0053997	0.00425045	686	tags=38%, list=4%, signal=37%	3553/6615/4790/7124/3458	IL1B/SNAI1/NFKB1/TNF/IFNG
GO_POSITIVE_REGULATION_OF_SMALL_MOLECULE_METABOLIC_PROCESS	GO_POSITIVE_REGULATION_OF_SMALL_MOLECULE_METABOLIC_PROCESS	107	0.655134	1.79076	0.000237713	0.00541638	0.00426358	1296	tags=22%, list=8%, signal=21%	3553/5743/5031/8013/3269/654/4790/7124/5209/6714/648791/136/551/5467/3458/6774/10580/5447/4923/157506/134429/5468/2023/5663	IL1B/PTGS2/P2RY6/NR4A3/HRH1/BMP6/NFKB1/TNF/PFKFB3/SRC/PPP1R3G/ADORA2B/AVP/PPARD/IFNG/STAT3/SORBS1/POR/NTSR1/RDH10/STARD4/PPARG/ENO1/PSEN1
GO_POSITIVE_REGULATION_OF_PROTEIN_KINASE_B_SIGNALING	GO_POSITIVE_REGULATION_OF_PROTEIN_KINASE_B_SIGNALING	128	0.629323	1.75138	0.000242786	0.00546171	0.00429926	2434	tags=34%, list=16%, signal=28%	6348/2152/2069/23551/941/7057/7124/5979/1236/6714/5291/29851/558/101/7046/114882/4157/118788/3688/7040/23533/114897/5795/10565/5008/5154/388581/2260/5747/5295/2254/56005/5025/3815/2534/391/92140/7295/5781/10456/9365/145957/9258	CCL3/F3/EREG/RASD2/CD80/THBS1/TNF/RET/CCR7/SRC/PIK3CB/ICOS/AXL/ADAM8/TGFBR1/OSBPL8/MC1R/PIK3AP1/ITGB1/TGFB1/PIK3R5/C1QTNF1/PTPRJ/ARFGEF1/OSM/PDGFA/C1QTNF12/FGFR1/PTK2/PIK3R1/FGF9/MYDGF/P2RX4/KIT/FYN/RHOG/MTDH/TXN/PTPN11/HAX1/KL/NRG4/MFHAS1
GO_INTRINSIC_APOPTOTIC_SIGNALING_PATHWAY	GO_INTRINSIC_APOPTOTIC_SIGNALING_PATHWAY	262	0.544326	1.59762	0.000243054	0.00546171	0.00429926	2725	tags=30%, list=18%, signal=25%	5743/6648/597/5329/664/6615/7124/4780/1687/6714/64065/7133/960/57761/6498/30001/57600/57007/54541/4582/637/5371/5034/4683/836/58515/5770/2907/3428/10105/2081/9024/64782/5163/55829/7494/25/7009/10955/81537/51527/64844/2023/837/6880/7186/3093/23645/8795/50484/5598/11235/79094/6279/5295/602/23368/10625/7159/675/10210/3090/259230/8428/10488/2537/3301/220042/55031/8453/79915/7178/22938/6280/2074/1540/…	PTGS2/SOD2/BCL2A1/PLAUR/BNIP3/SNAI1/TNF/NFE2L2/GSDME/SRC/PERP/TNFRSF1B/CD44/TRIB3/SKIL/ERO1A/FNIP2/ACKR3/DDIT4/MUC1/BID/PML/P4HB/NBN/CASP3/SELENOK/PTPN1/GRINA/IFI16/PPIF/ERN1/BRSK2/AEN/PDK1/SELENOS/XBP1/ABL1/TMBIM6/SERINC3/SGPP1/GSKIP/MARCHF7/ENO1/CASP4/TAF9/TRAF2/UBE2K/PPP1R15A/TNFRSF10B/RRM2B/MAPK7/PDCD10/CHAC1/S100A8/PIK3R1/BCL3/PPP1R13B/IVNS1ABP/TP53BP2/BRCA2/TOPORS/HIC1/SGMS1/STK24/CREB3/IFI…
GO_CELLULAR_RESPONSE_TO_HORMONE_STIMULUS	GO_CELLULAR_RESPONSE_TO_HORMONE_STIMULUS	490	0.488106	1.46767	0.00024321	0.00546171	0.00429926	1913	tags=20%, list=12%, signal=18%	3553/2706/5031/8013/56937/1906/5272/7490/7471/3383/1514/8651/6752/4790/8412/4780/7035/151176/3638/6714/57761/84830/6772/2100/4864/51141/54541/10865/8805/490/245973/119392/5872/5467/10011/79602/54331/29966/2908/8837/10148/6774/4851/11057/1398/9663/5770/114882/529/2729/760/57178/10580/3157/2235/2805/9021/55829/5447/7494/94056/7532/6517/4734/3625/2180/5905/1176/324/5468/5584/5908/81565/51606/5469/67…	IL1B/GJB2/P2RY6/NR4A3/PMEPA1/EDN1/SERPINB9/WT1/WNT1/ICAM1/CTSL/SOCS1/SSTR2/NFKB1/NA/NFE2L2/TFPI/ERFE/INSIG1/SRC/TRIB3/ADTRP/STAT1/ESR2/NPC1/INSIG2/DDIT4/ARID5A/TRIM24/ATP2B1/ATP6V1C2/SFR1/RAB13/PPARD/SRA1/ADIPOR2/GNG2/STRN3/NR3C1/CFLAR/EBI3/STAT3/NOTCH1/ABHD2/CRK/LPIN2/PTPN1/OSBPL8/ATP6V1E1/GCLC/CA2/ZMIZ1/SORBS1/HMGCS1/FECH/GOT1/SOCS3/SELENOS/POR/XBP1/SYAP1/YWHAG/SLC2A4/NEDD4/INHBB/ACSL1/RANGAP1/…
GO_NEGATIVE_REGULATION_OF_CELL_ADHESION	GO_NEGATIVE_REGULATION_OF_CELL_ADHESION	235	0.55669	1.62376	0.000245887	0.00547816	0.00431221	1857	tags=23%, list=12%, signal=20%	3557/3559/29126/384/27299/7471/654/941/7057/8651/4323/441478/3586/6385/84868/6714/7422/84830/4582/9404/80149/3659/4155/836/23603/4851/57045/650/25/54900/54542/53833/4763/7040/64844/4241/114897/9448/3902/5598/23189/135/3958/81/864/5747/285/5295/8379/4070/861/65125/3566	IL1RN/IL2RA/CD274/ARG2/ADAMDEC1/WNT1/BMP6/CD80/THBS1/SOCS1/MMP14/NRARP/IL10/SDC4/HAVCR2/SRC/VEGFA/ADTRP/MUC1/LPXN/ZC3H12A/IRF1/MBP/CASP3/CORO1C/NOTCH1/TWSG1/BMP2/ABL1/LAX1/RC3H2/IL20RB/NF1/TGFB1/MARCHF7/MELTF/C1QTNF1/MAP4K4/LAG3/MAPK7/KANK1/ADORA2A/LGALS3/ACTN4/RUNX3/PTK2/ANGPT2/PIK3R1/MAD1L1/TACSTD2/NA/WNK1/IL4R
GO_GLIAL_CELL_ACTIVATION	GO_GLIAL_CELL_ACTIVATION	46	0.757056	1.85883	0.000246289	0.00547816	0.00431221	1296	tags=24%, list=8%, signal=22%	3553/6348/8530/7124/7098/8877/10135/3458/2358/3949/5663	IL1B/CCL3/CST7/TNF/TLR3/SPHK1/NAMPT/IFNG/FPR2/LDLR/PSEN1
GO_POSITIVE_REGULATION_OF_CYTOKINE_BIOSYNTHETIC_PROCESS	GO_POSITIVE_REGULATION_OF_CYTOKINE_BIOSYNTHETIC_PROCESS	31	0.822813	1.90267	0.000254416	0.00563211	0.0044334	742	tags=29%, list=5%, signal=28%	3553/2069/941/7057/7124/7098/148022/3458/6774	IL1B/EREG/CD80/THBS1/TNF/TLR3/TICAM1/IFNG/STAT3
GO_RESPONSE_TO_OXIDATIVE_STRESS	GO_RESPONSE_TO_OXIDATIVE_STRESS	389	0.510667	1.52541	0.000256195	0.00564474	0.00444334	1570	tags=17%, list=10%, signal=15%	2706/5743/8288/23657/6648/8013/1906/7471/664/7124/4323/1236/3586/4780/135112/6714/8877/2643/6772/3939/7128/30001/23135/87178/9943/140809/5371/558/80149/5034/8837/836/116988/54583/58515/1398/7486/10276/2729/10105/9361/4520/54936/3840/5163/25824/83667/6780/55829/25/10516/51527/7296/5798/2882/5663/5516/8309/7186/50484/5598/1965/55512/3934/4779	GJB2/PTGS2/EPX/SLC7A11/SOD2/NR4A3/EDN1/WNT1/BNIP3/TNF/MMP14/CCR7/IL10/NFE2L2/NCOA7/SRC/SPHK1/GCH1/STAT1/LDHA/TNFAIP3/ERO1A/KDM6B/PNPT1/OXSR1/SRXN1/PML/AXL/ZC3H12A/P4HB/CFLAR/CASP3/AGAP3/EGLN1/SELENOK/CRK/WRN/NET1/GCLC/PPIF/LONP1/MTF1/ADPRS/KPNA4/PDK1/PRDX5/SESN2/STAU1/SELENOS/ABL1/FBLN5/GSKIP/TXNRD1/PTPRN/GPX7/PSEN1/PPP2CB/ACOX2/TRAF2/RRM2B/MAPK7/EIF2S1/SMPD3/LCN2/NFE2L1
GO_CD4_POSITIVE_ALPHA_BETA_T_CELL_ACTIVATION	GO_CD4_POSITIVE_ALPHA_BETA_T_CELL_ACTIVATION	84	0.679189	1.80583	0.000259676	0.00567296	0.00446555	2480	tags=38%, list=16%, signal=32%	29126/384/51561/1514/114548/941/8651/10538/1880/80149/10892/1604/3458/6774/64332/57045/5971/54542/9308/161882/246778/864/602/861/3566/6095/3718/7292/538/301/6304/5734	CD274/ARG2/IL23A/CTSL/NLRP3/CD80/SOCS1/BATF/GPR183/ZC3H12A/MALT1/CD55/IFNG/STAT3/NFKBIZ/TWSG1/RELB/RC3H2/CD83/ZFPM1/IL27/RUNX3/BCL3/NA/IL4R/RORA/JAK3/TNFSF4/ATP7A/ANXA1/SATB1/PTGER4
GO_REGULATION_OF_ADAPTIVE_IMMUNE_RESPONSE	GO_REGULATION_OF_ADAPTIVE_IMMUNE_RESPONSE	149	0.612841	1.72957	0.000259905	0.00567296	0.00446555	1379	tags=21%, list=9%, signal=19%	3553/29126/718/3554/51561/9173/114548/941/7124/3586/84868/64092/7133/7128/3665/80149/10892/3659/7037/64332/6830/4049/7855/54542/53833/7040/81545/3105/55183/8772/7186	IL1B/CD274/C3/IL1R1/IL23A/IL1RL1/NLRP3/CD80/TNF/IL10/HAVCR2/NA/TNFRSF1B/TNFAIP3/IRF7/ZC3H12A/MALT1/IRF1/TFRC/NFKBIZ/SUPT6H/LTA/FZD5/RC3H2/IL20RB/TGFB1/FBXO38/HLA-A/RIF1/FADD/TRAF2
GO_REGULATION_OF_T_HELPER_1_TYPE_IMMUNE_RESPONSE	GO_REGULATION_OF_T_HELPER_1_TYPE_IMMUNE_RESPONSE	22	0.847281	1.85607	0.000263231	0.00571885	0.00450167	312	tags=27%, list=2%, signal=27%	3553/3554/51561/9173/941/84868	IL1B/IL1R1/IL23A/IL1RL1/CD80/HAVCR2
GO_T_CELL_DIFFERENTIATION_IN_THYMUS	GO_T_CELL_DIFFERENTIATION_IN_THYMUS	71	0.706593	1.83983	0.000267325	0.00578091	0.00455052	1483	tags=15%, list=10%, signal=14%	3552/3553/7471/1236/3714/101/6935/7855/8772/10125/3140	IL1A/IL1B/WNT1/CCR7/JAG2/ADAM8/ZEB1/FZD5/FADD/RASGRP1/MR1
GO_POSITIVE_REGULATION_OF_ALCOHOL_BIOSYNTHETIC_PROCESS	GO_POSITIVE_REGULATION_OF_ALCOHOL_BIOSYNTHETIC_PROCESS	18	0.868249	1.84044	0.000271241	0.00583855	0.00459589	1133	tags=44%, list=7%, signal=41%	3553/5031/3269/654/7124/3458/5447/4923	IL1B/P2RY6/HRH1/BMP6/TNF/IFNG/POR/NTSR1
GO_POSITIVE_REGULATION_OF_NUCLEAR_DIVISION	GO_POSITIVE_REGULATION_OF_NUCLEAR_DIVISION	59	0.726605	1.8477	0.000275547	0.00590404	0.00464745	359	tags=8%, list=2%, signal=8%	3552/3553/2069/1906/8877	IL1A/IL1B/EREG/EDN1/SPHK1
GO_POSITIVE_REGULATION_OF_LYMPHOCYTE_MIGRATION	GO_POSITIVE_REGULATION_OF_LYMPHOCYTE_MIGRATION	32	0.804446	1.86913	0.000277307	0.00591463	0.00465578	772	tags=25%, list=5%, signal=24%	6364/6348/6351/6354/8740/9943/101/58515	CCL20/CCL3/CCL4/CCL7/TNFSF14/OXSR1/ADAM8/SELENOK
GO_REGULATION_OF_CYTOKINE_PRODUCTION_INVOLVED_IN_IMMUNE_RESPONSE	GO_REGULATION_OF_CYTOKINE_PRODUCTION_INVOLVED_IN_IMMUNE_RESPONSE	75	0.699264	1.8338	0.000289983	0.00615687	0.00484646	1379	tags=25%, list=9%, signal=23%	3553/8013/3554/8140/114548/7124/7098/3586/23586/7133/148022/10892/8482/7042/7855/7040/3105/7474/7186	IL1B/NR4A3/IL1R1/SLC7A5/NLRP3/TNF/TLR3/IL10/DDX58/TNFRSF1B/TICAM1/MALT1/SEMA7A/TGFB2/FZD5/TGFB1/HLA-A/WNT5A/TRAF2
GO_EPITHELIAL_CELL_DIFFERENTIATION	GO_EPITHELIAL_CELL_DIFFERENTIATION	440	0.497844	1.49247	0.000295307	0.00619575	0.00487707	1335	tags=15%, list=9%, signal=14%	3553/51458/26585/2069/23657/643418/3642/7490/7471/654/3383/1514/26298/7124/10409/7111/595/6714/639/64065/7422/6498/6772/23135/3714/3976/5230/137964/4914/200734/5144/5872/25861/196383/9839/3458/5045/836/23424/4851/7251/53918/310/2889/6935/650/50848/7494/5906/659/25/135228/286451/26051/7431/22862/9693/81537/5468/8394/4853/5908/28514/55151/7474/54825	IL1B/RHCG/GREM1/EREG/SLC7A11/LIPN/INSM1/WT1/WNT1/BMP6/ICAM1/CTSL/EHF/TNF/BASP1/TMOD1/CCND1/SRC/PRDM1/PERP/VEGFA/SKIL/STAT1/KDM6B/JAG2/LIF/PGK1/GPAT4/NTRK1/SPRED2/PDE4D/RAB13/WHRN/RILPL2/ZEB2/IFNG/FURIN/CASP3/TDRD7/NOTCH1/TSG101/PELO/ANXA7/RAPGEF1/ZEB1/BMP2/F11R/XBP1/RAP1A/BMPR2/ABL1/CD109/YIPF6/PPP1R16B/VIM/FNDC3A/RAPGEF2/SGPP1/PPARG/PIP5K1A/NOTCH2/RAP1B/DLL1/TMEM38B/WNT5A/CDHR2
GO_NEGATIVE_REGULATION_OF_INFLAMMATORY_RESPONSE	GO_NEGATIVE_REGULATION_OF_INFLAMMATORY_RESPONSE	111	0.644348	1.7677	0.000295421	0.00619575	0.00487707	1338	tags=19%, list=9%, signal=17%	2853/7130/3559/10203/8530/1991/114548/4790/3586/284207/7133/7128/80149/5467/2358/9021/55829/3949/53833/5468/27250	GPR31/TNFAIP6/IL2RA/CALCRL/CST7/ELANE/NLRP3/NFKB1/IL10/METRNL/TNFRSF1B/TNFAIP3/ZC3H12A/PPARD/FPR2/SOCS3/SELENOS/LDLR/IL20RB/PPARG/PDCD4
GO_NEGATIVE_REGULATION_OF_OXIDATIVE_STRESS_INDUCED_NEURON_DEATH	GO_NEGATIVE_REGULATION_OF_OXIDATIVE_STRESS_INDUCED_NEURON_DEATH	21	0.855291	1.86103	0.000295794	0.00619575	0.00487707	320	tags=24%, list=2%, signal=23%	23657/8013/7471/3586/135112	SLC7A11/NR4A3/WNT1/IL10/NCOA7
GO_RESPONSE_TO_INTERFERON_ALPHA	GO_RESPONSE_TO_INTERFERON_ALPHA	21	0.854484	1.85927	0.000311362	0.00649272	0.00511084	904	tags=33%, list=6%, signal=31%	3433/3437/27074/4600/558/5610/103	IFIT2/IFIT3/LAMP3/MX2/AXL/EIF2AK2/ADAR
GO_RESPONSE_TO_STEROID_HORMONE	GO_RESPONSE_TO_STEROID_HORMONE	259	0.542995	1.59267	0.000317346	0.00657752	0.00517758	1011	tags=12%, list=7%, signal=12%	2706/5743/3557/8013/56937/1906/654/3383/7057/6752/7124/3586/7035/595/6714/84830/2100/4864/54541/490/5467/29966/2908/8837/836/4851/11057/760/57178/2235/2805/7042	GJB2/PTGS2/IL1RN/NR4A3/PMEPA1/EDN1/BMP6/ICAM1/THBS1/SSTR2/TNF/IL10/TFPI/CCND1/SRC/ADTRP/ESR2/NPC1/DDIT4/ATP2B1/PPARD/STRN3/NR3C1/CFLAR/CASP3/NOTCH1/ABHD2/CA2/ZMIZ1/FECH/GOT1/TGFB2
GO_REGULATION_OF_DEFENSE_RESPONSE_TO_VIRUS	GO_REGULATION_OF_DEFENSE_RESPONSE_TO_VIRUS	71	0.703405	1.83153	0.000318244	0.00657752	0.00517758	1099	tags=24%, list=7%, signal=22%	3553/3559/51561/23586/330/329/151636/79132/6772/7128/10758/80149/7187/83666/58515/51191/54476	IL1B/IL2RA/IL23A/DDX58/BIRC3/BIRC2/DTX3L/DHX58/STAT1/TNFAIP3/TRAF3IP2/ZC3H12A/TRAF3/PARP9/SELENOK/HERC5/RNF216
GO_NEGATIVE_REGULATION_OF_CELL_CELL_ADHESION	GO_NEGATIVE_REGULATION_OF_CELL_CELL_ADHESION	151	0.607236	1.71603	0.000327148	0.00671572	0.00528637	1857	tags=25%, list=12%, signal=22%	3557/3559/29126/384/7471/654/941/8651/441478/3586/6385/84868/7422/84830/80149/3659/4155/836/4851/57045/650/25/54900/54542/53833/7040/64844/114897/3902/5598/135/3958/864/5747/8379/861/65125/3566	IL1RN/IL2RA/CD274/ARG2/WNT1/BMP6/CD80/SOCS1/NRARP/IL10/SDC4/HAVCR2/VEGFA/ADTRP/ZC3H12A/IRF1/MBP/CASP3/NOTCH1/TWSG1/BMP2/ABL1/LAX1/RC3H2/IL20RB/TGFB1/MARCHF7/C1QTNF1/LAG3/MAPK7/ADORA2A/LGALS3/RUNX3/PTK2/MAD1L1/NA/WNK1/IL4R
GO_MAINTENANCE_OF_LOCATION	GO_MAINTENANCE_OF_LOCATION	260	0.542198	1.59074	0.000327806	0.00671572	0.00528637	1308	tags=17%, list=9%, signal=16%	3553/6348/29923/718/5031/4283/356/4790/5552/7124/1236/3586/10938/3638/3099/1193/30001/3685/2495/57214/51141/4681/5371/80149/9446/5144/5467/148867/23515/114882/6721/5716/22821/255231/4792/7184/25/4923/64714/5905/134429/5468/9908/55151/123	IL1B/CCL3/HILPDA/C3/P2RY6/CXCL9/FASLG/NFKB1/SRGN/TNF/CCR7/IL10/EHD1/INSIG1/HK2/CLIC2/ERO1A/ITGAV/FTH1/CEMIP/INSIG2/NA/PML/ZC3H12A/GSTO1/PDE4D/PPARD/SLC30A7/MORC3/OSBPL8/SREBF2/PSMD10/RASA3/MCOLN2/NFKBIA/HSP90B1/ABL1/NTSR1/PDIA2/RANGAP1/STARD4/PPARG/G3BP2/TMEM38B/PLIN2
GO_SIGNAL_TRANSDUCTION_IN_ABSENCE_OF_LIGAND	GO_SIGNAL_TRANSDUCTION_IN_ABSENCE_OF_LIGAND	56	0.725789	1.83313	0.000330736	0.00674356	0.00530829	725	tags=14%, list=5%, signal=14%	3552/3553/597/7124/5979/355/3685/836	IL1A/IL1B/BCL2A1/TNF/RET/FAS/ITGAV/CASP3
GO_CELLULAR_RESPONSE_TO_CHEMICAL_STRESS	GO_CELLULAR_RESPONSE_TO_CHEMICAL_STRESS	308	0.527749	1.56238	0.00033326	0.00674356	0.00530829	2351	tags=24%, list=15%, signal=20%	2706/5743/23657/6648/8013/7471/664/7124/3586/4780/135112/6714/355/8877/2643/7128/30001/23135/6513/87178/9943/140809/5371/558/80149/5034/8837/836/116988/1398/10276/10105/9361/54936/5163/25824/5971/83667/6780/55829/25/6517/10516/51527/7296/5468/2882/7186/5598/1965/55512/3934/4779/11235/84557/10314/4482/5599/4548/8737/2547/2534/11179/51719/84181/25793/9588/847/8428/538/4929/7295/3301	GJB2/PTGS2/SLC7A11/SOD2/NR4A3/WNT1/BNIP3/TNF/IL10/NFE2L2/NCOA7/SRC/FAS/SPHK1/GCH1/TNFAIP3/ERO1A/KDM6B/SLC2A1/PNPT1/OXSR1/SRXN1/PML/AXL/ZC3H12A/P4HB/CFLAR/CASP3/AGAP3/CRK/NET1/PPIF/LONP1/ADPRS/PDK1/PRDX5/RELB/SESN2/STAU1/SELENOS/ABL1/SLC2A4/FBLN5/GSKIP/TXNRD1/PPARG/GPX7/TRAF2/MAPK7/EIF2S1/SMPD3/LCN2/NFE2L1/PDCD10/MAP1LC3A/LANCL1/MSRA/MAPK8/MTR/RIPK1/XRCC6/FYN/ZNF277/CAB39/CHD6/FBXO7/PRDX6/CAT/STK2…
GO_EPITHELIAL_CELL_PROLIFERATION	GO_EPITHELIAL_CELL_PROLIFERATION	304	0.529027	1.56531	0.000333497	0.00674356	0.00530829	1912	tags=21%, list=12%, signal=19%	2152/130367/2069/8013/6347/2321/654/26298/7057/7124/4323/8854/441478/3586/8828/595/79805/7422/6772/7128/2624/22846/1992/5467/116844/57521/8837/7046/6774/4851/79577/2081/650/3487/7042/7494/659/135228/26051/4763/7040/5798/5468/4853/92/5663/7474/5469/6776/26277/7049/51098/6239/80173/11235/2260/864/6868/7421/2254/4070/4856/221477/3398/56005	F3/SGPP2/EREG/NR4A3/CCL2/FLT1/BMP6/EHF/THBS1/TNF/MMP14/ALDH1A2/NRARP/IL10/NRP2/CCND1/VASH2/VEGFA/STAT1/TNFAIP3/GATA2/VASH1/SERPINB1/PPARD/LRG1/RPTOR/CFLAR/TGFBR1/STAT3/NOTCH1/CDC73/ERN1/BMP2/IGFBP4/TGFB2/XBP1/BMPR2/CD109/PPP1R16B/NF1/TGFB1/PTPRN/PPARG/NOTCH2/ACVR2A/PSEN1/WNT5A/MED1/STAT5A/TINF2/TGFBR3/IFT52/RREB1/IFT74/PDCD10/FGFR1/RUNX3/ADAM17/VDR/FGF9/TACSTD2/CCN3/C6orf89/ID2/MYDGF
GO_MODULATION_OF_PROCESS_OF_OTHER_ORGANISM	GO_MODULATION_OF_PROCESS_OF_OTHER_ORGANISM	90	0.661862	1.77514	0.000366363	0.00734625	0.0057827	1319	tags=19%, list=9%, signal=17%	6355/6590/6348/6351/5272/10318/9150/5806/80149/5610/2959/3836/2040/3840/2597/9367/10670	CCL8/SLPI/CCL3/CCL4/SERPINB9/TNIP1/CTDP1/PTX3/ZC3H12A/EIF2AK2/GTF2B/KPNA1/STOM/KPNA4/GAPDH/RAB9A/RRAGA
GO_POSITIVE_REGULATION_OF_HETEROTYPIC_CELL_CELL_ADHESION	GO_POSITIVE_REGULATION_OF_HETEROTYPIC_CELL_CELL_ADHESION	10	0.926437	1.78317	0.000366447	0.00734625	0.0057827	647	tags=60%, list=4%, signal=58%	3553/4680/7124/3586/960/10211	IL1B/CEACAM6/TNF/IL10/CD44/FLOT1
GO_REGULATION_OF_ALCOHOL_BIOSYNTHETIC_PROCESS	GO_REGULATION_OF_ALCOHOL_BIOSYNTHETIC_PROCESS	67	0.703236	1.81742	0.000385639	0.00769794	0.00605954	1133	tags=22%, list=7%, signal=21%	3553/5031/3269/654/4790/1717/7124/23541/6309/3458/6721/3157/650/5447/4923	IL1B/P2RY6/HRH1/BMP6/NFKB1/DHCR7/TNF/SEC14L2/SC5D/IFNG/SREBF2/HMGCS1/BMP2/POR/NTSR1
GO_MESENCHYMAL_TO_EPITHELIAL_TRANSITION	GO_MESENCHYMAL_TO_EPITHELIAL_TRANSITION	12	0.908289	1.79858	0.000392037	0.00779235	0.00613386	815	tags=50%, list=5%, signal=47%	26585/7490/10409/6772/3976/53918	GREM1/WT1/BASP1/STAT1/LIF/PELO
GO_CD4_POSITIVE_ALPHA_BETA_T_CELL_DIFFERENTIATION	GO_CD4_POSITIVE_ALPHA_BETA_T_CELL_DIFFERENTIATION	66	0.702759	1.81311	0.000399268	0.00790247	0.00622054	2480	tags=42%, list=16%, signal=36%	51561/1514/114548/941/8651/10538/1880/80149/10892/3458/6774/64332/5971/54542/9308/161882/246778/864/602/861/3566/6095/3718/7292/538/301/6304/5734	IL23A/CTSL/NLRP3/CD80/SOCS1/BATF/GPR183/ZC3H12A/MALT1/IFNG/STAT3/NFKBIZ/RELB/RC3H2/CD83/ZFPM1/IL27/RUNX3/BCL3/NA/IL4R/RORA/JAK3/TNFSF4/ATP7A/ANXA1/SATB1/PTGER4
GO_HETEROTYPIC_CELL_CELL_ADHESION	GO_HETEROTYPIC_CELL_CELL_ADHESION	52	0.733148	1.83204	0.000402528	0.00793337	0.00624486	699	tags=21%, list=5%, signal=20%	3553/3557/4680/7124/3586/64065/960/3685/965/10211/4155	IL1B/IL1RN/CEACAM6/TNF/IL10/PERP/CD44/ITGAV/CD58/FLOT1/MBP
GO_INTERLEUKIN_8_PRODUCTION	GO_INTERLEUKIN_8_PRODUCTION	67	0.701609	1.81321	0.000411348	0.00807184	0.00635386	742	tags=18%, list=5%, signal=17%	3553/2152/10394/671/1991/7124/7098/3586/23586/965/56957/6774	IL1B/F3/PRG3/BPI/ELANE/TNF/TLR3/IL10/DDX58/CD58/OTUD7B/STAT3
GO_REGULATION_OF_LIPID_METABOLIC_PROCESS	GO_REGULATION_OF_LIPID_METABOLIC_PROCESS	343	0.515774	1.5342	0.00041301	0.00807184	0.00635386	1908	tags=21%, list=12%, signal=19%	3553/5743/718/8013/51129/2321/654/8651/85441/6615/4790/338442/1717/7124/1236/23179/151176/84174/57406/3638/6714/8877/23541/57761/51141/6309/79888/551/29982/211/5467/79602/3458/9711/30849/6721/10580/96764/2358/3157/650/9021/5163/6907/55626/5447/3949/157506/2180/7040/134429/7296/5468/23533/123/5469/10269/55512/4779/51422/8439/5154/476/5747/5295/2170/7421/341/79718/3398/50486/84649	IL1B/PTGS2/C3/NR4A3/ANGPTL4/FLT1/BMP6/SOCS1/HELZ2/SNAI1/NFKB1/HCAR2/DHCR7/TNF/CCR7/RGL1/ERFE/SLA2/ABHD6/INSIG1/SRC/SPHK1/SEC14L2/TRIB3/INSIG2/SC5D/LPCAT1/AVP/NRBF2/ALAS1/PPARD/ADIPOR2/IFNG/RUBCN/PIK3R4/SREBF2/SORBS1/TGS1/FPR2/HMGCS1/BMP2/SOCS3/PDK1/TBL1X/AMBRA1/POR/LDLR/RDH10/ACSL1/TGFB1/STARD4/TXNRD1/PPARG/PIK3R5/PLIN2/MED1/ZMPSTE24/SMPD3/NFE2L1/PRKAG2/NSMAF/PDGFA/ATP1A1/PTK2/PIK3R1/FABP3/VDR/AP…
GO_VASCULAR_PROCESS_IN_CIRCULATORY_SYSTEM	GO_VASCULAR_PROCESS_IN_CIRCULATORY_SYSTEM	130	0.615926	1.71677	0.000426724	0.00830513	0.00653749	1229	tags=17%, list=8%, signal=16%	5743/6648/3269/1906/9732/654/3383/151/6714/2643/1889/7422/136/1636/490/551/5467/7525/2729/659/7040/5243	PTGS2/SOD2/HRH1/EDN1/DOCK4/BMP6/ICAM1/ADRA2B/SRC/GCH1/ECE1/VEGFA/ADORA2B/ACE/ATP2B1/AVP/PPARD/YES1/GCLC/BMPR2/TGFB1/ABCB1
GO_REGULATION_OF_GLUCOSE_TRANSMEMBRANE_TRANSPORT	GO_REGULATION_OF_GLUCOSE_TRANSMEMBRANE_TRANSPORT	58	0.718587	1.82284	0.000434233	0.0084162	0.00662493	1096	tags=31%, list=7%, signal=29%	3553/6506/718/8013/1906/7124/4780/151176/3099/57761/6513/79602/7525/114882/10580/8682/55829/5906	IL1B/SLC1A2/C3/NR4A3/EDN1/TNF/NFE2L2/ERFE/HK2/TRIB3/SLC2A1/ADIPOR2/YES1/OSBPL8/SORBS1/PEA15/SELENOS/RAP1A
GO_EMBRYONIC_MORPHOGENESIS	GO_EMBRYONIC_MORPHOGENESIS	418	0.496375	1.48616	0.000438905	0.0084716	0.00666854	1413	tags=16%, list=9%, signal=15%	9464/3557/123872/26585/8013/3914/2321/1906/1846/7471/6615/4323/5979/8854/3586/6385/6497/5898/3638/1889/23135/1844/3685/3714/51141/23187/8323/2624/1738/50515/51776/25861/9839/60436/4155/836/7046/4851/8820/2768/57045/9645/79577/54928/6935/9021/7042/3688/7855/3909/659/25/64327/157506/2114/57053/7289/7040/7296/4853/92/28514/5663/7474/23332/80856/3205/5469	HAND2/IL1RN/DNAAF1/GREM1/NR4A3/LAMB3/FLT1/EDN1/DUSP4/WNT1/SNAI1/MMP14/RET/ALDH1A2/IL10/SDC4/SKI/RALA/INSIG1/ECE1/KDM6B/DUSP2/ITGAV/JAG2/INSIG2/PHLDB1/FZD6/GATA2/DLD/CHST11/MAP3K20/WHRN/ZEB2/TGIF2/MBP/CASP3/TGFBR1/NOTCH1/HESX1/GNA12/TWSG1/NA/CDC73/BPNT2/ZEB1/SOCS3/TGFB2/ITGB1/FZD5/LAMA3/BMPR2/ABL1/LMBR1/RDH10/ETS2/CHRNA10/TULP3/TGFB1/TXNRD1/NOTCH2/ACVR2A/DLL1/PSEN1/WNT5A/CLASP1/LNPK/HOXA9/MED1
GO_ICOSANOID_BIOSYNTHETIC_PROCESS	GO_ICOSANOID_BIOSYNTHETIC_PROCESS	37	0.777525	1.8467	0.000440967	0.00847637	0.00667229	583	tags=16%, list=4%, signal=16%	3553/5743/10394/1906/241/551	IL1B/PTGS2/PRG3/EDN1/ALOX5AP/AVP
GO_REGULATION_OF_ALPHA_BETA_T_CELL_ACTIVATION	GO_REGULATION_OF_ALPHA_BETA_T_CELL_ACTIVATION	88	0.65882	1.76246	0.000453654	0.00867464	0.00682836	1857	tags=28%, list=12%, signal=25%	29126/384/51561/114548/941/8651/639/80149/10892/3659/1604/3458/4860/10148/64332/57045/54542/8546/3105/9308/246778/135/864/861/3566	CD274/ARG2/IL23A/NLRP3/CD80/SOCS1/PRDM1/ZC3H12A/MALT1/IRF1/CD55/IFNG/PNP/EBI3/NFKBIZ/TWSG1/RC3H2/AP3B1/HLA-A/CD83/IL27/ADORA2A/RUNX3/NA/IL4R
GO_POSITIVE_REGULATION_OF_T_HELPER_1_TYPE_IMMUNE_RESPONSE	GO_POSITIVE_REGULATION_OF_T_HELPER_1_TYPE_IMMUNE_RESPONSE	16	0.880472	1.82919	0.000454996	0.00867464	0.00682836	209	tags=25%, list=1%, signal=25%	3553/3554/51561/941	IL1B/IL1R1/IL23A/CD80
GO_HEAT_GENERATION	GO_HEAT_GENERATION	17	0.872051	1.82996	0.000467079	0.0088688	0.0069812	241	tags=24%, list=2%, signal=23%	3552/3553/5743/7124	IL1A/IL1B/PTGS2/TNF
GO_TUMOR_NECROSIS_FACTOR_MEDIATED_SIGNALING_PATHWAY	GO_TUMOR_NECROSIS_FACTOR_MEDIATED_SIGNALING_PATHWAY	151	0.598003	1.68994	0.0004738	0.00896	0.00705299	2824	tags=32%, list=18%, signal=27%	3604/7293/970/7185/7124/8740/330/329/355/8877/7133/6772/7128/8784/944/7187/117584/3987/5716/9966/84888/4049/4792/8887/837/7186/3093/7114/81/9491/6868/5695/5704/5713/8737/9705/5689/7292/5970/2150/5684/5718/5711/10213/1540/5690/7132/171392/5687	TNFRSF9/TNFRSF4/CD70/TRAF1/TNF/TNFSF14/BIRC3/BIRC2/FAS/SPHK1/TNFRSF1B/STAT1/TNFAIP3/TNFRSF18/TNFSF8/TRAF3/RFFL/LIMS1/PSMD10/TNFSF15/SPPL2A/LTA/NFKBIA/TAX1BP1/CASP4/TRAF2/UBE2K/TMSB4X/ACTN4/PSMF1/ADAM17/PSMB7/PSMC4/PSMD7/RIPK1/ST18/PSMB1/TNFSF4/RELA/F2RL1/PSMA3/PSMD12/PSMD5/PSMD14/CYLD/PSMB2/TNFRSF1A/ZNF675/PSMA6
GO_WOUND_HEALING	GO_WOUND_HEALING	412	0.497078	1.48747	0.000480082	0.00904218	0.00711768	1975	tags=21%, list=13%, signal=19%	3552/5055/2152/7980/2069/23657/1906/5329/7057/7124/4780/7035/5328/6385/10938/151/6714/5291/5359/960/7422/84830/9060/7128/7076/5657/8323/2769/558/2624/3659/5467/79602/54331/8837/836/7046/2768/1398/5868/308/50848/7042/2004/3688/7494/135228/3998/4763/7040/977/26127/8546/4853/23533/3937/7474/11234/23332/114897/80856/5873/1192/2151/161882/10565/6239/23189/135/11235/5154/6279/5341/5747/5295/6868/50808/…	IL1A/SERPINB2/F3/TFPI2/EREG/SLC7A11/EDN1/PLAUR/THBS1/TNF/NFE2L2/TFPI/PLAU/SDC4/EHD1/ADRA2B/SRC/PIK3CB/PLSCR1/CD44/VEGFA/ADTRP/PAPSS2/TNFAIP3/TIMP1/PRTN3/FZD6/GNA15/AXL/GATA2/IRF1/PPARD/ADIPOR2/GNG2/CFLAR/CASP3/TGFBR1/GNA12/CRK/RAB5A/ANXA5/F11R/TGFB2/ELK3/ITGB1/XBP1/CD109/LMAN1/NF1/TGFB1/CD151/FGFR1OP2/AP3B1/NOTCH2/PIK3R5/LCP2/WNT5A/HPS5/CLASP1/C1QTNF1/LNPK/RAB27A/CLIC1/F2RL2/ZFPM1/ARFGEF1/RREB1/K…
GO_REGULATION_OF_GTPASE_ACTIVITY	GO_REGULATION_OF_GTPASE_ACTIVITY	417	0.49548	1.48332	0.000490011	0.00919213	0.00723571	1504	tags=16%, list=10%, signal=15%	6364/6355/414062/6348/6351/6354/5909/54453/5996/6367/6347/57514/9732/3383/1236/8412/375790/6004/5657/8787/4914/51735/26037/9754/285190/11153/125058/116988/23603/1398/3987/10276/25780/2043/7107/26286/50807/253959/79658/8301/163486/2889/22821/50848/3688/116984/5906/134957/23161/93663/23365/4763/9693/5905/10483/57568/8394/7474/81565/10125/9605/9448/394/57522/5048/10144/64786	CCL20/CCL8/CCL3L3/CCL3/CCL4/CCL7/RAP1GAP/RIN2/RGS1/CCL22/CCL2/ARHGAP31/DOCK4/ICAM1/CCR7/NA/AGRN/RGS16/PRTN3/RGS9/NTRK1/RAPGEF6/SIPA1L1/STARD8/RGPD4/FICD/TBC1D16/AGAP3/CORO1C/CRK/LIMS1/NET1/RASGRP3/EPHA4/GPR137B/ARFGAP3/ASAP1/RALGAPA1/ARHGAP10/PICALM/DENND1B/RAPGEF1/RASA3/F11R/ITGB1/ARAP2/RAP1A/STXBP5/SNX13/ARHGAP18/ARHGEF12/NF1/RAPGEF2/RANGAP1/SEC23B/SIPA1L2/PIP5K1A/WNT5A/NDEL1/RASGRP1/VPS9D1/MAP…
GO_REGULATION_OF_LIPID_LOCALIZATION	GO_REGULATION_OF_LIPID_LOCALIZATION	115	0.626916	1.72624	0.000493352	0.00921778	0.0072559	1446	tags=20%, list=9%, signal=18%	3553/29923/718/1906/654/7057/4790/7124/151176/10938/56729/3685/80149/5467/114882/6721/4792/4923/5468/123/114897/6696/116150	IL1B/HILPDA/C3/EDN1/BMP6/THBS1/NFKB1/TNF/ERFE/EHD1/RETN/ITGAV/ZC3H12A/PPARD/OSBPL8/SREBF2/NFKBIA/NTSR1/PPARG/PLIN2/C1QTNF1/SPP1/NUS1
GO_POSITIVE_REGULATION_OF_REACTIVE_OXYGEN_SPECIES_METABOLIC_PROCESS	GO_POSITIVE_REGULATION_OF_REACTIVE_OXYGEN_SPECIES_METABOLIC_PROCESS	82	0.671293	1.77947	0.000497043	0.00924974	0.00728106	1206	tags=17%, list=8%, signal=16%	3553/5743/1906/3383/7057/7124/4780/5806/80149/148022/3458/2358/575/7040	IL1B/PTGS2/EDN1/ICAM1/THBS1/TNF/NFE2L2/PTX3/ZC3H12A/TICAM1/IFNG/FPR2/ADGRB1/TGFB1
GO_VITAMIN_D_BIOSYNTHETIC_PROCESS	GO_VITAMIN_D_BIOSYNTHETIC_PROCESS	11	0.914443	1.7867	0.000499793	0.00926402	0.0072923	686	tags=45%, list=4%, signal=43%	3553/6615/4790/7124/3458	IL1B/SNAI1/NFKB1/TNF/IFNG
GO_REGULATION_OF_ANION_TRANSPORT	GO_REGULATION_OF_ANION_TRANSPORT	72	0.687756	1.7937	0.000507956	0.00937811	0.00738211	1949	tags=29%, list=13%, signal=26%	3553/1906/7057/285966/151176/6860/551/124935/760/3688/4923/5243/5663/135/2260/8564/2170/22930/6812/8737/5025	IL1B/EDN1/THBS1/TCAF2/ERFE/SYT4/AVP/SLC43A2/CA2/ITGB1/NTSR1/ABCB1/PSEN1/ADORA2A/FGFR1/KMO/FABP3/RAB3GAP1/STXBP1/RIPK1/P2RX4
GO_REGULATION_OF_MUSCLE_SYSTEM_PROCESS	GO_REGULATION_OF_MUSCLE_SYSTEM_PROCESS	169	0.583578	1.66385	0.000511475	0.0094059	0.00740398	594	tags=12%, list=4%, signal=12%	5743/9464/8013/10203/6547/1906/9732/6752/5142/3759/151/8877/7133/1193/9150/136/490/80149/9446/5144	PTGS2/HAND2/NR4A3/CALCRL/SLC8A3/EDN1/DOCK4/SSTR2/PDE4B/KCNJ2/ADRA2B/SPHK1/TNFRSF1B/CLIC2/CTDP1/ADORA2B/ATP2B1/ZC3H12A/GSTO1/PDE4D
GO_POSITIVE_REGULATION_OF_CYTOKINE_SECRETION	GO_POSITIVE_REGULATION_OF_CYTOKINE_SECRETION	55	0.717748	1.80788	0.000518114	0.00949063	0.00747068	1313	tags=31%, list=9%, signal=28%	3552/9173/64135/7124/3586/84868/23586/6714/5005/3458/6774/58515/24145/7855/5004/2597/7474	IL1A/IL1RL1/IFIH1/TNF/IL10/HAVCR2/DDX58/SRC/ORM2/IFNG/STAT3/SELENOK/PANX1/FZD5/ORM1/GAPDH/WNT5A
GO_EXTRACELLULAR_STRUCTURE_ORGANIZATION	GO_EXTRACELLULAR_STRUCTURE_ORGANIZATION	300	0.523276	1.54712	0.000521779	0.00952043	0.00749414	1334	tags=17%, list=9%, signal=16%	3696/26585/4327/3914/3908/7490/1511/1991/3383/1514/7057/64116/7124/4323/3036/4791/7133/375790/960/84830/30001/7076/3685/5806/23187/4016/5033/10211/101/5045/8837/682/7046/4851/50848/7042/9644/3688/3909/25/1308/285590/10516/4763/7040/5768/4241/55151/23332/2006	ITGB8/GREM1/MMP19/LAMB3/LAMA2/WT1/CTSG/ELANE/ICAM1/CTSL/THBS1/SLC39A8/TNF/MMP14/HAS1/NFKB2/TNFRSF1B/AGRN/CD44/ADTRP/ERO1A/TIMP1/ITGAV/PTX3/PHLDB1/LOXL1/P4HA1/FLOT1/ADAM8/FURIN/CFLAR/BSG/TGFBR1/NOTCH1/F11R/TGFB2/SH3PXD2A/ITGB1/LAMA3/ABL1/COL17A1/SH3PXD2B/FBLN5/NF1/TGFB1/QSOX1/MELTF/TMEM38B/CLASP1/ELN
GO_LEUKOCYTE_HOMEOSTASIS	GO_LEUKOCYTE_HOMEOSTASIS	80	0.671085	1.77361	0.000548738	0.00997336	0.00785067	1124	tags=19%, list=7%, signal=17%	3559/23657/338442/5142/8740/5291/355/1880/6498/7128/558/124976/836/25/54542	IL2RA/SLC7A11/HCAR2/PDE4B/TNFSF14/PIK3CB/FAS/GPR183/SKIL/TNFAIP3/AXL/SPNS2/CASP3/ABL1/RC3H2
GO_RESPONSE_TO_ORGANOPHOSPHORUS	GO_RESPONSE_TO_ORGANOPHOSPHORUS	108	0.634203	1.73497	0.00055793	0.0101011	0.00795124	1361	tags=19%, list=9%, signal=17%	3553/5743/366/4327/5031/6547/7490/329/6772/3939/87178/682/24145/2889/7184/5906/9693/5798/5908/610	IL1B/PTGS2/AQP9/MMP19/P2RY6/SLC8A3/WT1/BIRC2/STAT1/LDHA/PNPT1/BSG/PANX1/RAPGEF1/HSP90B1/RAP1A/RAPGEF2/PTPRN/RAP1B/HCN2
GO_AGING	GO_AGING	253	0.538267	1.57685	0.000562143	0.0101381	0.00798036	937	tags=15%, list=6%, signal=14%	2706/5743/6506/6648/384/1906/597/7471/3383/3586/4791/4780/7133/10135/56729/30001/7076/87178/4914/140679/490/8942/5371/22846/1738/5144/6774/1267/23515/7486/3987/493856/2729/9516/9361/57178/8301	GJB2/PTGS2/SLC1A2/SOD2/ARG2/EDN1/BCL2A1/WNT1/ICAM1/IL10/NFKB2/NFE2L2/TNFRSF1B/NAMPT/RETN/ERO1A/TIMP1/PNPT1/NTRK1/SLC32A1/ATP2B1/KYNU/PML/VASH1/DLD/PDE4D/STAT3/CNP/MORC3/WRN/LIMS1/CISD2/GCLC/LITAF/LONP1/ZMIZ1/PICALM
GO_REGULATION_OF_FATTY_ACID_BIOSYNTHETIC_PROCESS	GO_REGULATION_OF_FATTY_ACID_BIOSYNTHETIC_PROCESS	33	0.786903	1.83901	0.000580122	0.0104221	0.00820391	644	tags=21%, list=4%, signal=20%	3553/5743/3638/57761/51141/551/79602	IL1B/PTGS2/INSIG1/TRIB3/INSIG2/AVP/ADIPOR2
GO_SENSORY_ORGAN_DEVELOPMENT	GO_SENSORY_ORGAN_DEVELOPMENT	375	0.504498	1.50552	0.000605749	0.0108245	0.00852066	1337	tags=17%, list=9%, signal=16%	2706/9464/23657/8013/2321/1906/7490/356/7471/654/5979/8854/8412/7111/25945/6385/3985/6497/1687/3638/639/4814/1889/7422/6498/80326/3714/51141/200734/490/79888/8323/2624/25861/9839/60436/7046/6774/23424/4851/8820/57045/2043/56006/85407/6935/650/7042/7855/659/43/7431/157506/57053/285590/7289/4763/4853/22926/5584/28514/5663/7474/80714	GJB2/HAND2/SLC7A11/NR4A3/FLT1/EDN1/WT1/FASLG/WNT1/BMP6/RET/ALDH1A2/NA/TMOD1/NECTIN3/SDC4/LIMK2/SKI/GSDME/INSIG1/PRDM1/NINJ1/ECE1/VEGFA/SKIL/WNT10A/JAG2/INSIG2/SPRED2/ATP2B1/LPCAT1/FZD6/GATA2/WHRN/ZEB2/TGIF2/TGFBR1/STAT3/TDRD7/NOTCH1/HESX1/TWSG1/EPHA4/SMG9/NKD1/ZEB1/BMP2/TGFB2/FZD5/BMPR2/ACHE/VIM/RDH10/CHRNA10/SH3PXD2B/TULP3/NF1/NOTCH2/ATF6/PRKCI/DLL1/PSEN1/WNT5A/PBX4
GO_REGULATION_OF_LYMPHOCYTE_CHEMOTAXIS	GO_REGULATION_OF_LYMPHOCYTE_CHEMOTAXIS	21	0.843765	1.83595	0.000607155	0.0108245	0.00852066	475	tags=29%, list=3%, signal=28%	6348/6351/6354/6347/8740/9943	CCL3/CCL4/CCL7/CCL2/TNFSF14/OXSR1
GO_PATTERN_SPECIFICATION_PROCESS	GO_PATTERN_SPECIFICATION_PROCESS	273	0.528939	1.55592	0.000610693	0.0108462	0.00853773	2460	tags=27%, list=16%, signal=23%	84504/9464/123872/26585/718/1906/7490/57801/7471/6615/10409/8854/441478/8828/6497/83538/80055/4681/4300/22856/9839/7046/4851/9645/10512/85407/3955/8553/6935/650/9371/7855/659/54778/2114/10371/7289/324/4853/92/28514/5663/7474/54880/3205/444/51098/23432/80173/2260/3516/10370/6015/8701/3212/10159/63917/10959/123016/54806/92344/6045/9968/22823/4088/29880/79728/79809/23509/7849/25914/3206/5916/3200	NKX6-2/HAND2/DNAAF1/GREM1/C3/EDN1/WT1/HES4/WNT1/SNAI1/BASP1/ALDH1A2/NRARP/NRP2/SKI/TTC25/PGAP1/NA/MLLT3/CHSY1/ZEB2/TGFBR1/NOTCH1/SEMA3C/NKD1/LFNG/BHLHE40/ZEB1/BMP2/KIF3B/FZD5/BMPR2/RNF111/ETS2/SEMA3A/TULP3/APC/NOTCH2/ACVR2A/DLL1/PSEN1/WNT5A/BCOR/HOXA9/ASPH/IFT52/GPR161/IFT74/FGFR1/RBPJ/CITED2/RING1/DNAH11/HOXB2/ATP6AP2/GALNT11/TMED2/TTC8/AHI1/GORAB/RNF2/MED12/MTF2/SMAD3/ALG5/PALB2/TTC21B/POFUT1/P…
GO_POSITIVE_REGULATION_OF_ACUTE_INFLAMMATORY_RESPONSE	GO_POSITIVE_REGULATION_OF_ACUTE_INFLAMMATORY_RESPONSE	23	0.829519	1.83191	0.000614071	0.0108649	0.00855244	656	tags=26%, list=4%, signal=25%	3553/5743/718/7124/1236/101	IL1B/PTGS2/C3/TNF/CCR7/ADAM8
GO_POSITIVE_REGULATION_OF_KIDNEY_DEVELOPMENT	GO_POSITIVE_REGULATION_OF_KIDNEY_DEVELOPMENT	26	0.815073	1.83338	0.00061787	0.0108908	0.00857287	721	tags=27%, list=5%, signal=26%	26585/7490/5979/10409/7422/3976/8837	GREM1/WT1/RET/BASP1/VEGFA/LIF/CFLAR
GO_AMINO_ACID_IMPORT	GO_AMINO_ACID_IMPORT	31	0.795647	1.83985	0.00063073	0.0110757	0.0087184	1451	tags=42%, list=9%, signal=38%	23657/6506/8140/6541/120103/6536/124935/6509/3688/4923/5663/6583/6520	SLC7A11/SLC1A2/SLC7A5/SLC7A1/SLC36A4/SLC6A9/SLC43A2/SLC1A4/ITGB1/NTSR1/PSEN1/SLC22A4/SLC3A2
GO_SMOOTH_MUSCLE_CONTRACTION	GO_SMOOTH_MUSCLE_CONTRACTION	72	0.681593	1.77763	0.000634945	0.011108	0.00874379	594	tags=14%, list=4%, signal=13%	5743/10203/1906/9732/6752/151/8877/136/490/5144	PTGS2/CALCRL/EDN1/DOCK4/SSTR2/ADRA2B/SPHK1/ADORA2B/ATP2B1/PDE4D
GO_MULTI_MULTICELLULAR_ORGANISM_PROCESS	GO_MULTI_MULTICELLULAR_ORGANISM_PROCESS	156	0.587024	1.66343	0.000651327	0.011352	0.00893592	736	tags=12%, list=5%, signal=12%	3553/2706/5743/1906/84868/151/639/10135/7422/6513/7076/3976/27161/7005/8372/2182/5467/79602/682	IL1B/GJB2/PTGS2/EDN1/HAVCR2/ADRA2B/PRDM1/NAMPT/VEGFA/SLC2A1/TIMP1/LIF/AGO2/TEAD3/HYAL3/ACSL4/PPARD/ADIPOR2/BSG
GO_REGULATION_OF_PRODUCTION_OF_MOLECULAR_MEDIATOR_OF_IMMUNE_RESPONSE	GO_REGULATION_OF_PRODUCTION_OF_MOLECULAR_MEDIATOR_OF_IMMUNE_RESPONSE	122	0.615582	1.70545	0.000663655	0.0115239	0.00907121	1379	tags=21%, list=9%, signal=20%	3553/8013/3554/7293/8140/114548/7124/7098/3586/23586/7133/148022/10892/8482/7037/6830/7042/7855/7494/2821/7009/7040/3105/55183/7474/7186	IL1B/NR4A3/IL1R1/TNFRSF4/SLC7A5/NLRP3/TNF/TLR3/IL10/DDX58/TNFRSF1B/TICAM1/MALT1/SEMA7A/TFRC/SUPT6H/TGFB2/FZD5/XBP1/GPI/TMBIM6/TGFB1/HLA-A/RIF1/WNT5A/TRAF2
GO_POSITIVE_REGULATION_OF_FATTY_ACID_METABOLIC_PROCESS	GO_POSITIVE_REGULATION_OF_FATTY_ACID_METABOLIC_PROCESS	25	0.819609	1.83376	0.000666909	0.0115375	0.00908193	636	tags=20%, list=4%, signal=19%	3553/5743/8013/551/5467	IL1B/PTGS2/NR4A3/AVP/PPARD
GO_REGULATION_OF_VESICLE_MEDIATED_TRANSPORT	GO_REGULATION_OF_VESICLE_MEDIATED_TRANSPORT	452	0.487136	1.46154	0.0006711	0.0115574	0.00909754	2098	tags=23%, list=14%, signal=21%	3553/26585/718/255057/6347/84251/23413/7124/3601/10815/6385/6860/10938/5898/3638/6714/10814/5291/8877/7422/3685/136/5806/5657/558/2624/8372/5872/6386/27/81555/10211/3458/9711/23011/4851/9829/7251/5770/8775/30817/55681/80331/8650/30844/8301/5868/9024/2358/2889/6845/5906/25/134957/23176/6517/9527/9367/23327/4043/11252/3560/977/5468/5908/28514/7474/23332/9765/6853/84896/7879/5873/5795/51762/55512/51…	IL1B/GREM1/C3/CBARP/CCL2/SGIP1/NCS1/TNF/IL15RA/CPLX1/SDC4/SYT4/EHD1/RALA/INSIG1/SRC/CPLX2/PIK3CB/SPHK1/VEGFA/ITGAV/ADORA2B/PTX3/PRTN3/AXL/GATA2/HYAL3/RAB13/SDCBP/ABL2/YIPF5/FLOT1/IFNG/RUBCN/RAB21/NOTCH1/DNAJC6/TSG101/PTPN1/NAPA/ADGRE2/SCYL2/DNAJC5/NUMB/EHD4/PICALM/RAB5A/BRSK2/FPR2/RAPGEF1/VAMP7/RAP1A/ABL1/STXBP5/SEPTIN8/SLC2A4/GOSR1/RAB9A/NEDD4L/LRPAP1/PACSIN2/IL2RB/CD151/PPARG/RAP1B/DLL1/WNT5A/C…
GO_NEGATIVE_REGULATION_OF_IMMUNE_RESPONSE	GO_NEGATIVE_REGULATION_OF_IMMUNE_RESPONSE	123	0.614421	1.7039	0.000674011	0.0115574	0.00909754	1302	tags=20%, list=9%, signal=18%	3559/384/5272/9173/7124/3586/84868/64092/79132/7128/10906/80149/1604/9111/1398/3428/103/7042/55829/54542/53833/7040/5468/3105	IL2RA/ARG2/SERPINB9/IL1RL1/TNF/IL10/HAVCR2/NA/DHX58/TNFAIP3/TRAFD1/ZC3H12A/CD55/NMI/CRK/IFI16/ADAR/TGFB2/SELENOS/RC3H2/IL20RB/TGFB1/PPARG/HLA-A
GO_ANTIBACTERIAL_HUMORAL_RESPONSE	GO_ANTIBACTERIAL_HUMORAL_RESPONSE	23	0.827081	1.82653	0.000675479	0.0115574	0.00909754	467	tags=22%, list=3%, signal=21%	6590/6037/1511/1991/820	SLPI/RNASE3/CTSG/ELANE/CAMP
GO_REGULATION_OF_EPITHELIAL_CELL_APOPTOTIC_PROCESS	GO_REGULATION_OF_EPITHELIAL_CELL_APOPTOTIC_PROCESS	65	0.69183	1.7817	0.000684445	0.011668	0.00918466	1541	tags=25%, list=10%, signal=22%	6347/51129/356/3383/7057/7124/4780/7128/79155/2624/8837/25/5584/27250/5598/1965	CCL2/ANGPTL4/FASLG/ICAM1/THBS1/TNF/NFE2L2/TNFAIP3/TNIP2/GATA2/CFLAR/ABL1/PRKCI/PDCD4/MAPK7/EIF2S1
GO_POSITIVE_REGULATION_OF_MACROPHAGE_ACTIVATION	GO_POSITIVE_REGULATION_OF_MACROPHAGE_ACTIVATION	20	0.847561	1.82824	0.000690662	0.0117312	0.00923438	557	tags=30%, list=4%, signal=29%	6348/9173/7057/3586/84868/79155	CCL3/IL1RL1/THBS1/IL10/HAVCR2/TNIP2
GO_PRODUCTION_OF_MOLECULAR_MEDIATOR_OF_IMMUNE_RESPONSE	GO_PRODUCTION_OF_MOLECULAR_MEDIATOR_OF_IMMUNE_RESPONSE	183	0.567288	1.62667	0.00069371	0.0117403	0.00924153	1379	tags=19%, list=9%, signal=17%	3553/8013/3554/7293/1991/8140/114548/7124/7098/10538/3586/23586/7133/10758/148022/10892/1604/8482/7037/4683/6830/9452/163486/7042/7855/7494/2821/7009/7040/4189/3105/55183/7474/7186	IL1B/NR4A3/IL1R1/TNFRSF4/ELANE/SLC7A5/NLRP3/TNF/TLR3/BATF/IL10/DDX58/TNFRSF1B/TRAF3IP2/TICAM1/MALT1/CD55/SEMA7A/TFRC/NBN/SUPT6H/ITM2A/DENND1B/TGFB2/FZD5/XBP1/GPI/TMBIM6/TGFB1/DNAJB9/HLA-A/RIF1/WNT5A/TRAF2
GO_POSITIVE_REGULATION_OF_INTERFERON_GAMMA_PRODUCTION	GO_POSITIVE_REGULATION_OF_INTERFERON_GAMMA_PRODUCTION	57	0.708869	1.79401	0.000699199	0.0117905	0.00928103	1585	tags=32%, list=10%, signal=28%	3553/3554/51561/8140/5142/7124/7098/84868/5144/10148/4049/7855/3105/7474/8772/10125/161882/246778	IL1B/IL1R1/IL23A/SLC7A5/PDE4B/TNF/TLR3/HAVCR2/PDE4D/EBI3/LTA/FZD5/HLA-A/WNT5A/FADD/RASGRP1/ZFPM1/IL27
GO_POSITIVE_REGULATION_OF_IMMUNE_EFFECTOR_PROCESS	GO_POSITIVE_REGULATION_OF_IMMUNE_EFFECTOR_PROCESS	187	0.568745	1.63383	0.000713549	0.0119714	0.00942341	1496	tags=21%, list=10%, signal=20%	3553/718/8013/3554/7293/51561/8140/114548/941/7124/23586/79132/136/2624/148022/10892/8482/7037/3458/64332/30817/2889/4049/6845/7855/7494/2821/5906/7040/81545/3105/55183/7474/8772/4068/10125/7186/3902/3140/5795	IL1B/C3/NR4A3/IL1R1/TNFRSF4/IL23A/SLC7A5/NLRP3/CD80/TNF/DDX58/DHX58/ADORA2B/GATA2/TICAM1/MALT1/SEMA7A/TFRC/IFNG/NFKBIZ/ADGRE2/RAPGEF1/LTA/VAMP7/FZD5/XBP1/GPI/RAP1A/TGFB1/FBXO38/HLA-A/RIF1/WNT5A/FADD/SH2D1A/RASGRP1/TRAF2/LAG3/MR1/PTPRJ
GO_ALCOHOL_BIOSYNTHETIC_PROCESS	GO_ALCOHOL_BIOSYNTHETIC_PROCESS	130	0.604925	1.68611	0.000715052	0.0119714	0.00942341	1789	tags=23%, list=12%, signal=21%	3553/5031/3269/654/4790/1717/7124/3638/8877/23541/2643/51141/6309/3458/6721/3157/64768/650/2805/253430/5447/80271/4923/9807/10558/116150/50814/5341/1727/7421	IL1B/P2RY6/HRH1/BMP6/NFKB1/DHCR7/TNF/INSIG1/SPHK1/SEC14L2/GCH1/INSIG2/SC5D/IFNG/SREBF2/HMGCS1/IPPK/BMP2/GOT1/IPMK/POR/ITPKC/NTSR1/IP6K1/SPTLC1/NUS1/NSDHL/PLEK/CYB5R3/VDR
GO_VITAMIN_D_METABOLIC_PROCESS	GO_VITAMIN_D_METABOLIC_PROCESS	17	0.866583	1.81849	0.000724778	0.0120752	0.00950516	686	tags=35%, list=4%, signal=34%	3553/6615/4790/7124/5641/3458	IL1B/SNAI1/NFKB1/TNF/LGMN/IFNG
GO_REGULATION_OF_STEROID_BIOSYNTHETIC_PROCESS	GO_REGULATION_OF_STEROID_BIOSYNTHETIC_PROCESS	78	0.668099	1.76047	0.000726426	0.0120752	0.00950516	1222	tags=21%, list=8%, signal=19%	3553/654/6615/4790/1717/7124/3638/23541/51141/6309/3458/6721/3157/650/5447/134429	IL1B/BMP6/SNAI1/NFKB1/DHCR7/TNF/INSIG1/SEC14L2/INSIG2/SC5D/IFNG/SREBF2/HMGCS1/BMP2/POR/STARD4
GO_REGULATION_OF_LIPID_BIOSYNTHETIC_PROCESS	GO_REGULATION_OF_LIPID_BIOSYNTHETIC_PROCESS	158	0.583599	1.65527	0.00072901	0.0120752	0.00950516	1805	tags=23%, list=12%, signal=20%	3553/5743/718/654/6615/4790/1717/7124/57406/3638/8877/23541/57761/51141/6309/79888/551/79602/3458/6721/10580/2358/3157/650/5447/3949/157506/134429/55512/51422/8439/5154/476/2170/7421/341	IL1B/PTGS2/C3/BMP6/SNAI1/NFKB1/DHCR7/TNF/ABHD6/INSIG1/SPHK1/SEC14L2/TRIB3/INSIG2/SC5D/LPCAT1/AVP/ADIPOR2/IFNG/SREBF2/SORBS1/FPR2/HMGCS1/BMP2/POR/LDLR/RDH10/STARD4/SMPD3/PRKAG2/NSMAF/PDGFA/ATP1A1/FABP3/VDR/APOC1
GO_REGIONALIZATION	GO_REGIONALIZATION	208	0.552323	1.59891	0.000758191	0.0125142	0.0098507	1313	tags=17%, list=9%, signal=16%	84504/123872/26585/718/1906/7490/57801/7471/6615/10409/8854/441478/8828/6497/80055/4681/4300/22856/9839/7046/4851/10512/85407/3955/8553/650/7855/659/2114/10371/7289/4853/92/28514/5663/7474	NKX6-2/DNAAF1/GREM1/C3/EDN1/WT1/HES4/WNT1/SNAI1/BASP1/ALDH1A2/NRARP/NRP2/SKI/PGAP1/NA/MLLT3/CHSY1/ZEB2/TGFBR1/NOTCH1/SEMA3C/NKD1/LFNG/BHLHE40/BMP2/FZD5/BMPR2/ETS2/SEMA3A/TULP3/NOTCH2/ACVR2A/DLL1/PSEN1/WNT5A
GO_REGULATION_OF_KIDNEY_DEVELOPMENT	GO_REGULATION_OF_KIDNEY_DEVELOPMENT	35	0.771893	1.81897	0.000774949	0.0127457	0.010033	721	tags=23%, list=5%, signal=22%	26585/7490/5979/10409/7422/6772/3976/8837	GREM1/WT1/RET/BASP1/VEGFA/STAT1/LIF/CFLAR
GO_POSITIVE_REGULATION_OF_ION_TRANSPORT	GO_POSITIVE_REGULATION_OF_ION_TRANSPORT	210	0.550586	1.59473	0.000779255	0.0127712	0.010053	1864	tags=18%, list=12%, signal=16%	3553/6348/6351/23566/5031/4283/6347/1906/3759/9456/151176/6860/57214/8787/490/551/9446/3458/6845/3688/25/4923/5243/5663/54997/6324/7114/162514/135/3958/81/8564/2170/22930/6812/54413/65125/483	IL1B/CCL3/CCL4/LPAR3/P2RY6/CXCL9/CCL2/EDN1/KCNJ2/HOMER1/ERFE/SYT4/CEMIP/RGS9/ATP2B1/AVP/GSTO1/IFNG/VAMP7/ITGB1/ABL1/NTSR1/ABCB1/PSEN1/TESC/SCN1B/TMSB4X/TRPV3/ADORA2A/LGALS3/ACTN4/KMO/FABP3/RAB3GAP1/STXBP1/NLGN3/WNK1/ATP1B3
GO_RESPONSE_TO_PEPTIDE_HORMONE	GO_RESPONSE_TO_PEPTIDE_HORMONE	358	0.504215	1.50232	0.000782505	0.0127712	0.010053	1913	tags=22%, list=12%, signal=20%	3553/2706/5743/2069/8013/1906/7471/3383/8651/6775/4790/8412/3586/4780/151176/3638/6714/57761/56729/6772/6513/7076/87178/51141/8743/490/245973/5872/8837/682/6774/1398/9663/5770/114882/529/2729/760/10580/2805/9021/83667/55829/5447/7494/25948/94056/7532/6517/3625/5905/1176/324/5798/5468/5584/5908/81565/51606/6776/9296/51762/7049/55667/23189/23175/5315/388581/5747/523/5295/2170/3416/55532/6814/10458/…	IL1B/GJB2/PTGS2/EREG/NR4A3/EDN1/WNT1/ICAM1/SOCS1/STAT4/NFKB1/NA/IL10/NFE2L2/ERFE/INSIG1/SRC/TRIB3/RETN/STAT1/SLC2A1/TIMP1/PNPT1/INSIG2/TNFSF10/ATP2B1/ATP6V1C2/RAB13/CFLAR/BSG/STAT3/CRK/LPIN2/PTPN1/OSBPL8/ATP6V1E1/GCLC/CA2/SORBS1/GOT1/SOCS3/SESN2/SELENOS/POR/XBP1/KBTBD2/SYAP1/YWHAG/SLC2A4/INHBB/RANGAP1/AP3S1/APC/PTPRN/PPARG/PRKCI/RAP1B/NDEL1/ATP6V1H/STAT5A/ATP6V1F/RAB8B/TGFBR3/DENND4C/KANK1/LPIN1/…
GO_BONE_MINERALIZATION	GO_BONE_MINERALIZATION	88	0.648061	1.73368	0.000784698	0.0127712	0.010053	1606	tags=20%, list=10%, signal=18%	5743/6348/26585/9636/654/5552/22904/490/9562/650/659/7040/92/55151/54880/10269/55512/29887	PTGS2/CCL3/GREM1/ISG15/BMP6/SRGN/SBNO2/ATP2B1/MINPP1/BMP2/BMPR2/TGFB1/ACVR2A/TMEM38B/BCOR/ZMPSTE24/SMPD3/SNX10
GO_POSITIVE_REGULATION_OF_PEPTIDE_SECRETION	GO_POSITIVE_REGULATION_OF_PEPTIDE_SECRETION	172	0.574764	1.64104	0.000787498	0.0127722	0.0100538	2105	tags=27%, list=14%, signal=23%	3552/7293/9173/55638/654/64135/338442/7124/3586/84868/23586/6714/8111/10802/5005/2182/5467/101/3458/6774/58515/24145/2696/7042/7855/7494/5004/2821/43/2597/7040/7474/3783/51762/135/23601/388581/6279/25874/23705/3566/64083/7036/7097/6717/27230	IL1A/TNFRSF4/IL1RL1/SYBU/BMP6/IFIH1/HCAR2/TNF/IL10/HAVCR2/DDX58/SRC/GPR68/SEC24A/ORM2/ACSL4/PPARD/ADAM8/IFNG/STAT3/SELENOK/PANX1/GIPR/TGFB2/FZD5/XBP1/ORM1/GPI/ACHE/GAPDH/TGFB1/WNT5A/KCNN4/RAB8B/ADORA2A/CLEC5A/C1QTNF12/S100A8/MPC2/CADM1/IL4R/GOLPH3/TFR2/TLR2/SRI/SERP1
GO_PANCREAS_DEVELOPMENT	GO_PANCREAS_DEVELOPMENT	48	0.729925	1.8022	0.000802787	0.0129751	0.0102136	1313	tags=21%, list=9%, signal=19%	84504/123872/3642/654/8854/6729/2696/7494/28514/7474	NKX6-2/DNAAF1/INSM1/BMP6/ALDH1A2/SRP54/GIPR/XBP1/DLL1/WNT5A
GO_REGULATION_OF_HETEROTYPIC_CELL_CELL_ADHESION	GO_REGULATION_OF_HETEROTYPIC_CELL_CELL_ADHESION	18	0.857397	1.81744	0.000813722	0.0131065	0.010317	699	tags=44%, list=5%, signal=42%	3553/3557/4680/7124/3586/960/10211/4155	IL1B/IL1RN/CEACAM6/TNF/IL10/CD44/FLOT1/MBP
GO_PROSTAGLANDIN_SECRETION	GO_PROSTAGLANDIN_SECRETION	10	0.915796	1.76269	0.000820144	0.0131646	0.0103627	150	tags=20%, list=1%, signal=20%	3553/1906	IL1B/EDN1
GO_CARBOHYDRATE_TRANSPORT	GO_CARBOHYDRATE_TRANSPORT	114	0.617605	1.69878	0.000823781	0.0131777	0.010373	1847	tags=32%, list=12%, signal=28%	3553/366/6506/718/8013/1906/7124/6515/4780/151176/3099/57761/6513/11182/144195/5467/79602/7525/6518/114882/5357/10580/8682/83667/55829/5906/6517/5584/55512/51422/57210/388581/5295/10237/6814/126321	IL1B/AQP9/SLC1A2/C3/NR4A3/EDN1/TNF/SLC2A3/NFE2L2/ERFE/HK2/TRIB3/SLC2A1/SLC2A6/SLC2A14/PPARD/ADIPOR2/YES1/SLC2A5/OSBPL8/PLS1/SORBS1/PEA15/SESN2/SELENOS/RAP1A/SLC2A4/PRKCI/SMPD3/PRKAG2/SLC45A4/C1QTNF12/PIK3R1/SLC35B1/STXBP3/MFSD12
GO_NEGATIVE_REGULATION_OF_INTRINSIC_APOPTOTIC_SIGNALING_PATHWAY	GO_NEGATIVE_REGULATION_OF_INTRINSIC_APOPTOTIC_SIGNALING_PATHWAY	86	0.650132	1.73454	0.000849095	0.0135363	0.0106552	1517	tags=24%, list=10%, signal=22%	5743/6648/5329/6615/4780/6714/960/57007/4582/637/5770/2907/10105/55829/7494/7009/64844/2023/6880/50484/5598	PTGS2/SOD2/PLAUR/SNAI1/NFE2L2/SRC/CD44/ACKR3/MUC1/BID/PTPN1/GRINA/PPIF/SELENOS/XBP1/TMBIM6/MARCHF7/ENO1/TAF9/RRM2B/MAPK7
GO_POSITIVE_REGULATION_OF_PRODUCTION_OF_MOLECULAR_MEDIATOR_OF_IMMUNE_RESPONSE	GO_POSITIVE_REGULATION_OF_PRODUCTION_OF_MOLECULAR_MEDIATOR_OF_IMMUNE_RESPONSE	86	0.648866	1.73116	0.000886012	0.0140767	0.0110807	1379	tags=22%, list=9%, signal=20%	3553/8013/3554/7293/8140/114548/23586/148022/10892/8482/7037/7855/7494/2821/7040/3105/55183/7474/7186	IL1B/NR4A3/IL1R1/TNFRSF4/SLC7A5/NLRP3/DDX58/TICAM1/MALT1/SEMA7A/TFRC/FZD5/XBP1/GPI/TGFB1/HLA-A/RIF1/WNT5A/TRAF2
GO_REGULATION_OF_EXTRINSIC_APOPTOTIC_SIGNALING_PATHWAY_IN_ABSENCE_OF_LIGAND	GO_REGULATION_OF_EXTRINSIC_APOPTOTIC_SIGNALING_PATHWAY_IN_ABSENCE_OF_LIGAND	33	0.776096	1.81375	0.000899189	0.0141948	0.0111737	257	tags=12%, list=2%, signal=12%	3552/3553/7124/5979	IL1A/IL1B/TNF/RET
GO_POSITIVE_REGULATION_OF_BLOOD_CIRCULATION	GO_POSITIVE_REGULATION_OF_BLOOD_CIRCULATION	46	0.733134	1.80009	0.000903058	0.0141948	0.0111737	594	tags=15%, list=4%, signal=15%	5743/3269/1906/3383/2643/551/5144	PTGS2/HRH1/EDN1/ICAM1/GCH1/AVP/PDE4D
GO_REGULATION_OF_GRANULOCYTE_CHEMOTAXIS	GO_REGULATION_OF_GRANULOCYTE_CHEMOTAXIS	42	0.745656	1.80725	0.000903908	0.0141948	0.0111737	272	tags=14%, list=2%, signal=14%	3576/51561/1906/7057/1435/1236	CXCL8/IL23A/EDN1/THBS1/CSF1/CCR7
GO_NEGATIVE_REGULATION_OF_LEUKOCYTE_PROLIFERATION	GO_NEGATIVE_REGULATION_OF_LEUKOCYTE_PROLIFERATION	70	0.67686	1.75954	0.000905601	0.0141948	0.0111737	784	tags=17%, list=5%, signal=16%	6355/3559/29126/26585/384/941/3586/6385/84868/7128/836/57045	CCL8/IL2RA/CD274/GREM1/ARG2/CD80/IL10/SDC4/HAVCR2/TNFAIP3/CASP3/TWSG1
GO_NEURON_DEATH	GO_NEURON_DEATH	292	0.517459	1.52755	0.000910328	0.0142057	0.0111822	1814	tags=19%, list=12%, signal=17%	6348/23657/6648/8013/6347/112399/356/7471/664/1435/7124/3586/135112/355/7133/10135/26355/3812/54541/4914/637/558/5641/101/3458/5966/836/54583/6774/2729/80331/8301/7042/55626/25/5063/128866/2597/4763/6416/5584/5663/7474/8772/10936/7186/2002/1965/135/997/112398/8564/10314/5913/55532/6812	CCL3/SLC7A11/SOD2/NR4A3/CCL2/EGLN3/FASLG/WNT1/BNIP3/CSF1/TNF/IL10/NCOA7/FAS/TNFRSF1B/NAMPT/FAM162A/KIR3DL2/DDIT4/NTRK1/BID/AXL/LGMN/ADAM8/IFNG/REL/CASP3/EGLN1/STAT3/GCLC/DNAJC5/PICALM/TGFB2/AMBRA1/ABL1/PAK3/CHMP4B/GAPDH/NF1/MAP2K4/PRKCI/PSEN1/WNT5A/FADD/GPR75/TRAF2/ELK1/EIF2S1/ADORA2A/CDC34/EGLN2/KMO/LANCL1/RAPSN/SLC30A10/STXBP1
GO_NEGATIVE_REGULATION_OF_SECRETION	GO_NEGATIVE_REGULATION_OF_SECRETION	136	0.594535	1.66399	0.000916464	0.0142057	0.0111822	1440	tags=15%, list=9%, signal=14%	3553/3589/255057/384/7293/1906/5552/6860/151/7133/84830/3976/80149/4851/5906/7009/3625/4763/5908/64285/7879	IL1B/IL11/CBARP/ARG2/TNFRSF4/EDN1/SRGN/SYT4/ADRA2B/TNFRSF1B/ADTRP/LIF/ZC3H12A/NOTCH1/RAP1A/TMBIM6/INHBB/NF1/RAP1B/RHBDF1/RAB7A
GO_REGULATION_OF_MYELOID_CELL_DIFFERENTIATION	GO_REGULATION_OF_MYELOID_CELL_DIFFERENTIATION	214	0.545379	1.58191	0.00091751	0.0142057	0.0111822	2529	tags=27%, list=17%, signal=23%	6348/9636/8013/51561/7057/1435/7124/7098/8111/6772/3665/3976/2624/5814/3458/6774/79577/7107/760/4792/140685/4763/7040/4853/92/23774/28514/8772/54997/3205/169200/5469/29843/161882/3958/5295/861/6886/10826/55904/3398/27327/8737/4850/57690/9646/11006/57095/58508/4067/1432/10456/5916/116151/9770/567/10519	CCL3/ISG15/NR4A3/IL23A/THBS1/CSF1/TNF/TLR3/GPR68/STAT1/IRF7/LIF/GATA2/PURB/IFNG/STAT3/CDC73/GPR137B/CA2/NFKBIA/ZBTB46/NF1/TGFB1/NOTCH2/ACVR2A/BRD1/DLL1/FADD/TESC/HOXA9/TMEM64/MED1/SENP1/ZFPM1/LGALS3/PIK3R1/NA/TAL1/FAXDC2/KMT2E/ID2/TNRC6A/RIPK1/CNOT4/TNRC6C/CTR9/LILRB4/PITHD1/KMT2C/LYN/MAPK14/HAX1/RARG/FAM210B/RASSF2/B2M/CIB1
GO_REGULATION_OF_ACUTE_INFLAMMATORY_RESPONSE	GO_REGULATION_OF_ACUTE_INFLAMMATORY_RESPONSE	35	0.768827	1.81174	0.000918458	0.0142057	0.0111822	1253	tags=29%, list=8%, signal=26%	3553/5743/718/114548/7124/1236/101/55829/53833/5468	IL1B/PTGS2/C3/NLRP3/TNF/CCR7/ADAM8/SELENOS/IL20RB/PPARG
GO_RESPONSE_TO_PURINE_CONTAINING_COMPOUND	GO_RESPONSE_TO_PURINE_CONTAINING_COMPOUND	120	0.611329	1.69069	0.000933761	0.0143947	0.011331	1361	tags=20%, list=9%, signal=18%	3553/5743/366/4327/5031/6547/7490/329/6772/3939/87178/682/24145/3157/2889/7184/5906/54464/9693/5798/5468/5908/55151/610	IL1B/PTGS2/AQP9/MMP19/P2RY6/SLC8A3/WT1/BIRC2/STAT1/LDHA/PNPT1/BSG/PANX1/HMGCS1/RAPGEF1/HSP90B1/RAP1A/XRN1/RAPGEF2/PTPRN/PPARG/RAP1B/TMEM38B/HCN2
GO_PROSTANOID_BIOSYNTHETIC_PROCESS	GO_PROSTANOID_BIOSYNTHETIC_PROCESS	23	0.822234	1.81582	0.000951811	0.0146247	0.011512	583	tags=17%, list=4%, signal=17%	3553/5743/1906/551	IL1B/PTGS2/EDN1/AVP
GO_RESPONSE_TO_PEPTIDE	GO_RESPONSE_TO_PEPTIDE	430	0.485737	1.4554	0.000968242	0.0148284	0.0116724	1913	tags=22%, list=12%, signal=20%	3553/2706/5743/2069/8013/1906/7471/3383/8651/6775/4790/8412/3586/4780/151176/3638/6714/10135/57761/56729/6772/7128/6513/7076/87178/51141/8743/51510/490/773/245973/5641/5872/8837/682/6774/4851/1398/9663/5770/114882/529/2043/2729/760/10580/2358/2805/9021/83667/55829/5447/4792/7494/25948/94056/7532/6517/7431/3625/4363/5905/1176/324/5798/5468/5584/5908/837/5663/81565/51606/6776/9296/51762/7049/55667/…	IL1B/GJB2/PTGS2/EREG/NR4A3/EDN1/WNT1/ICAM1/SOCS1/STAT4/NFKB1/NA/IL10/NFE2L2/ERFE/INSIG1/SRC/NAMPT/TRIB3/RETN/STAT1/TNFAIP3/SLC2A1/TIMP1/PNPT1/INSIG2/TNFSF10/CHMP5/ATP2B1/CACNA1A/ATP6V1C2/LGMN/RAB13/CFLAR/BSG/STAT3/NOTCH1/CRK/LPIN2/PTPN1/OSBPL8/ATP6V1E1/EPHA4/GCLC/CA2/SORBS1/FPR2/GOT1/SOCS3/SESN2/SELENOS/POR/NFKBIA/XBP1/KBTBD2/SYAP1/YWHAG/SLC2A4/VIM/INHBB/ABCC1/RANGAP1/AP3S1/APC/PTPRN/PPARG/PRKCI/…
GO_NEGATIVE_REGULATION_OF_SIGNAL_TRANSDUCTION_IN_ABSENCE_OF_LIGAND	GO_NEGATIVE_REGULATION_OF_SIGNAL_TRANSDUCTION_IN_ABSENCE_OF_LIGAND	24	0.816942	1.8153	0.00100779	0.0153836	0.0121094	241	tags=12%, list=2%, signal=12%	3552/3553/7124	IL1A/IL1B/TNF
GO_POSITIVE_REGULATION_OF_PROTEOLYSIS	GO_POSITIVE_REGULATION_OF_PROTEOLYSIS	317	0.509565	1.51069	0.00101797	0.0154884	0.0121919	1462	tags=18%, list=10%, signal=17%	3553/2152/431705/112399/356/127544/114548/7124/4323/10318/4780/6714/355/64065/7133/57761/26355/440730/255488/8743/637/85409/5371/80149/10892/10010/5641/23786/101/3458/4155/5045/8837/10418/6774/116224/2043/2729/3428/10444/5716/9966/8301/1509/10769/160418/5468/4241/2023/5663/3300/8772/7186/29843/444/1452/8795	IL1B/F3/ASTL/EGLN3/FASLG/RNF19B/NLRP3/TNF/MMP14/TNIP1/NFE2L2/SRC/FAS/PERP/TNFRSF1B/TRIB3/FAM162A/TRIM67/RNF144B/TNFSF10/BID/NKD2/PML/ZC3H12A/MALT1/TANK/LGMN/BCL2L13/ADAM8/IFNG/MBP/FURIN/CFLAR/SPON1/STAT3/FAM122A/EPHA4/GCLC/IFI16/ZER1/PSMD10/TNFSF15/PICALM/CTSD/PLK2/TMTC3/PPARG/MELTF/ENO1/PSEN1/DNAJB2/FADD/TRAF2/SENP1/ASPH/CSNK1A1/TNFRSF10B
GO_POSITIVE_REGULATION_OF_LIPID_LOCALIZATION	GO_POSITIVE_REGULATION_OF_LIPID_LOCALIZATION	72	0.670196	1.7479	0.00102861	0.0155995	0.0122793	1444	tags=22%, list=9%, signal=20%	3553/29923/718/1906/654/4790/151176/10938/56729/80149/6721/4792/4923/123/114897/6696	IL1B/HILPDA/C3/EDN1/BMP6/NFKB1/ERFE/EHD1/RETN/ZC3H12A/SREBF2/NFKBIA/NTSR1/PLIN2/C1QTNF1/SPP1
GO_POSITIVE_REGULATION_OF_MEMBRANE_PROTEIN_ECTODOMAIN_PROTEOLYSIS	GO_POSITIVE_REGULATION_OF_MEMBRANE_PROTEIN_ECTODOMAIN_PROTEOLYSIS	15	0.871598	1.79097	0.00106715	0.0160831	0.01266	710	tags=40%, list=5%, signal=38%	3553/7124/7133/101/3458/5045	IL1B/TNF/TNFRSF1B/ADAM8/IFNG/FURIN
GO_METANEPHROS_MORPHOGENESIS	GO_METANEPHROS_MORPHOGENESIS	20	0.840568	1.81315	0.00106739	0.0160831	0.01266	463	tags=25%, list=3%, signal=24%	26585/7490/10409/6772/3976	GREM1/WT1/BASP1/STAT1/LIF
GO_ACTIVATION_OF_PROTEIN_KINASE_ACTIVITY	GO_ACTIVATION_OF_PROTEIN_KINASE_ACTIVITY	282	0.518416	1.52724	0.00107085	0.0160835	0.0126603	1767	tags=19%, list=12%, signal=17%	3553/26585/23566/3656/9052/51561/7057/8651/7124/7098/5979/151/6714/5291/7422/1326/136/4914/10892/51776/9175/57521/7046/1398/5770/114882/5610/9966/2081/23118/2889/650/7042/257397/8682/25/5063/9043/6416/5663/7474/1464/7186/3654/9448/8795/56034/51422/8649/1848/29990/10298/1847	IL1B/GREM1/LPAR3/IRAK2/GPRC5A/IL23A/THBS1/SOCS1/TNF/TLR3/RET/ADRA2B/SRC/PIK3CB/VEGFA/MAP3K8/ADORA2B/NTRK1/MALT1/MAP3K20/MAP3K13/RPTOR/TGFBR1/CRK/PTPN1/OSBPL8/EIF2AK2/TNFSF15/ERN1/TAB2/RAPGEF1/BMP2/TGFB2/TAB3/PEA15/ABL1/PAK3/SPAG9/MAP2K4/PSEN1/WNT5A/CSPG4/TRAF2/IRAK1/MAP4K4/TNFRSF10B/PDGFC/PRKAG2/LAMTOR3/DUSP6/PILRB/PAK4/DUSP5
GO_CELL_CELL_JUNCTION_ORGANIZATION	GO_CELL_CELL_JUNCTION_ORGANIZATION	157	0.578067	1.63871	0.00107759	0.0161327	0.0126991	1809	tags=22%, list=12%, signal=20%	3553/2706/654/6615/3801/7124/11228/23136/25945/6714/84552/64065/7422/1636/5657/1500/5872/25861/7046/3987/2043/8650/50848/7042/7855/7040/324/5584/5586/9948/81/6624/57493/23705/861	IL1B/GJB2/BMP6/SNAI1/KIFC3/TNF/RASSF8/EPB41L3/NECTIN3/SRC/PARD6G/PERP/VEGFA/ACE/PRTN3/CTNND1/RAB13/WHRN/TGFBR1/LIMS1/EPHA4/NUMB/F11R/TGFB2/FZD5/TGFB1/APC/PRKCI/PKN2/WDR1/ACTN4/FSCN1/HEG1/CADM1/NA
GO_RESPONSE_TO_INORGANIC_SUBSTANCE	GO_RESPONSE_TO_INORGANIC_SUBSTANCE	442	0.481871	1.4448	0.00108925	0.0162552	0.0127955	2299	tags=23%, list=15%, signal=20%	3552/5743/366/6648/8013/1906/654/3383/664/7057/7124/241/1236/3586/9456/4780/595/6860/6714/8877/2643/85365/6772/3939/7128/23135/4864/4914/558/80149/5641/353174/8837/836/682/54583/4891/1398/10276/310/2729/760/2696/10105/9361/4520/54936/3157/2235/3840/2805/25/84301/4734/10516/23327/342618/7474/5516/7186/51507/1371/56670/5598/57817/1965/55512/3934/4779/553115/11235/25932/84557/6279/55532/5599/728294/…	IL1A/PTGS2/AQP9/SOD2/NR4A3/EDN1/BMP6/ICAM1/BNIP3/THBS1/TNF/ALOX5AP/CCR7/IL10/HOMER1/NFE2L2/CCND1/SYT4/SRC/SPHK1/GCH1/ALG2/STAT1/LDHA/TNFAIP3/KDM6B/NPC1/NTRK1/AXL/ZC3H12A/LGMN/ZACN/CFLAR/CASP3/BSG/EGLN1/SLC11A2/CRK/NET1/ANXA7/GCLC/CA2/GIPR/PPIF/LONP1/MTF1/ADPRS/HMGCS1/FECH/KPNA4/GOT1/ABL1/DDI2/NEDD4/FBLN5/NEDD4L/SLFN14/WNT5A/PPP2CB/TRAF2/RTF2/CPOX/SUCNR1/MAPK7/HAMP/EIF2S1/SMPD3/LCN2/NFE2L1/PEF1/PD…
GO_MODULATION_BY_HOST_OF_SYMBIONT_PROCESS	GO_MODULATION_BY_HOST_OF_SYMBIONT_PROCESS	54	0.706747	1.77565	0.00109304	0.0162599	0.0127992	928	tags=15%, list=6%, signal=14%	6355/6348/6351/9150/5806/80149/2959/2040	CCL8/CCL3/CCL4/CTDP1/PTX3/ZC3H12A/GTF2B/STOM
GO_REGULATION_OF_MYELINATION	GO_REGULATION_OF_MYELINATION	39	0.749374	1.79521	0.00109766	0.0162768	0.0128125	366	tags=10%, list=2%, signal=10%	84504/400746/8530/7133	NKX6-2/NCMAP/CST7/TNFRSF1B
GO_INTERACTION_WITH_HOST	GO_INTERACTION_WITH_HOST	181	0.560329	1.60519	0.0011029	0.0163027	0.0128329	2716	tags=31%, list=18%, signal=26%	3576/7293/5272/3383/1514/941/2838/10318/6737/6714/3685/4864/5806/5371/558/1500/1604/8372/7037/5034/7251/5610/3836/3840/7706/50848/3688/79720/3949/128866/2597/85363/10670/290/7879/23601/3416/83737/8519/950/55128/51652/25978/9217/2934/6510/2993/3837/5818/9213/5819/1508/1234/9972/27243/6993/3916	CXCL8/TNFRSF4/SERPINB9/ICAM1/CTSL/CD80/GPR15/TNIP1/TRIM21/SRC/ITGAV/NPC1/PTX3/PML/AXL/CTNND1/CD55/HYAL3/TFRC/P4HB/TSG101/EIF2AK2/KPNA1/KPNA4/TRIM25/F11R/ITGB1/VPS37B/LDLR/CHMP4B/GAPDH/TRIM5/RRAGA/ANPEP/RAB7A/CLEC5A/IDE/ITCH/IFITM1/SCARB2/TRIM68/CHMP3/CHMP2B/VAPB/GSN/SLC1A5/GYPA/KPNB1/NECTIN1/XPR1/NECTIN2/CTSB/CCR5/NUP153/CHMP2A/DYNLT1/LAMP1
GO_POSITIVE_REGULATION_OF_CYTOKINE_PRODUCTION_INVOLVED_IN_IMMUNE_RESPONSE	GO_POSITIVE_REGULATION_OF_CYTOKINE_PRODUCTION_INVOLVED_IN_IMMUNE_RESPONSE	51	0.717036	1.78647	0.00113067	0.0166226	0.0130847	1379	tags=25%, list=9%, signal=23%	3553/8013/3554/8140/114548/23586/148022/10892/8482/7855/3105/7474/7186	IL1B/NR4A3/IL1R1/SLC7A5/NLRP3/DDX58/TICAM1/MALT1/SEMA7A/FZD5/HLA-A/WNT5A/TRAF2
GO_NEGATIVE_REGULATION_OF_RESPONSE_TO_OXIDATIVE_STRESS	GO_NEGATIVE_REGULATION_OF_RESPONSE_TO_OXIDATIVE_STRESS	44	0.734553	1.7914	0.00113166	0.0166226	0.0130847	320	tags=16%, list=2%, signal=16%	23657/6648/8013/7471/3586/4780/135112	SLC7A11/SOD2/NR4A3/WNT1/IL10/NFE2L2/NCOA7
GO_BIOMINERALIZATION	GO_BIOMINERALIZATION	110	0.615223	1.68669	0.00113541	0.0166254	0.0130869	1606	tags=19%, list=10%, signal=17%	5743/6348/26585/9636/654/5552/22904/490/4851/9562/650/659/7040/92/55151/249/54880/6696/10269/55512/29887	PTGS2/CCL3/GREM1/ISG15/BMP6/SRGN/SBNO2/ATP2B1/NOTCH1/MINPP1/BMP2/BMPR2/TGFB1/ACVR2A/TMEM38B/ALPL/BCOR/SPP1/ZMPSTE24/SMPD3/SNX10
GO_NEGATIVE_REGULATION_OF_GLIOGENESIS	GO_NEGATIVE_REGULATION_OF_GLIOGENESIS	29	0.790201	1.8087	0.00117181	0.0171048	0.0134643	1195	tags=17%, list=8%, signal=16%	84504/6497/4851/3949/4763	NKX6-2/SKI/NOTCH1/LDLR/NF1
GO_POSITIVE_REGULATION_OF_ESTABLISHMENT_OF_PROTEIN_LOCALIZATION	GO_POSITIVE_REGULATION_OF_ESTABLISHMENT_OF_PROTEIN_LOCALIZATION	342	0.499493	1.48556	0.00117753	0.0171347	0.0134878	2105	tags=20%, list=14%, signal=18%	3552/3553/5743/7293/9173/55638/654/64135/285966/338442/7124/3586/84868/23586/6714/8111/10802/5005/57214/637/80149/2182/5467/101/3458/6774/58515/24145/7251/6721/2696/2040/7042/7855/7494/5004/2821/7532/43/2597/7040/5663/7474/3783/9919/2010/135/11235/23601/9695/388581/9495/7984/5295/25874/51366/23705/5599/161291/118424/3566/23368/51201/7159/64083/5534/7097/6717/2534/27230	IL1A/IL1B/PTGS2/TNFRSF4/IL1RL1/SYBU/BMP6/IFIH1/TCAF2/HCAR2/TNF/IL10/HAVCR2/DDX58/SRC/GPR68/SEC24A/ORM2/CEMIP/BID/ZC3H12A/ACSL4/PPARD/ADAM8/IFNG/STAT3/SELENOK/PANX1/TSG101/SREBF2/GIPR/STOM/TGFB2/FZD5/XBP1/ORM1/GPI/YWHAG/ACHE/GAPDH/TGFB1/PSEN1/WNT5A/KCNN4/SEC16A/EMD/ADORA2A/PDCD10/CLEC5A/EDEM1/C1QTNF12/AKAP5/ARHGEF5/PIK3R1/MPC2/UBR5/CADM1/MAPK8/TMEM30B/UBE2J2/IL4R/PPP1R13B/ZDHHC2/TP53BP2/GOLPH3/PPP…
GO_POSITIVE_REGULATION_OF_NEUTROPHIL_MIGRATION	GO_POSITIVE_REGULATION_OF_NEUTROPHIL_MIGRATION	27	0.798835	1.80839	0.00118203	0.0171468	0.0134974	656	tags=22%, list=4%, signal=21%	3576/3554/51561/1906/1236/101	CXCL8/IL1R1/IL23A/EDN1/CCR7/ADAM8
GO_MOVEMENT_IN_HOST_ENVIRONMENT	GO_MOVEMENT_IN_HOST_ENVIRONMENT	143	0.585902	1.64775	0.00120564	0.017412	0.0137061	2716	tags=34%, list=18%, signal=28%	3576/7293/3383/1514/941/2838/6737/6714/3685/4864/5806/5371/558/1500/1604/8372/7037/5034/7251/7706/50848/3688/79720/3949/128866/85363/290/7879/23601/3416/83737/8519/950/55128/51652/25978/2934/6510/2993/5818/9213/5819/1508/1234/9972/27243/6993/3916	CXCL8/TNFRSF4/ICAM1/CTSL/CD80/GPR15/TRIM21/SRC/ITGAV/NPC1/PTX3/PML/AXL/CTNND1/CD55/HYAL3/TFRC/P4HB/TSG101/TRIM25/F11R/ITGB1/VPS37B/LDLR/CHMP4B/TRIM5/ANPEP/RAB7A/CLEC5A/IDE/ITCH/IFITM1/SCARB2/TRIM68/CHMP3/CHMP2B/GSN/SLC1A5/GYPA/NECTIN1/XPR1/NECTIN2/CTSB/CCR5/NUP153/CHMP2A/DYNLT1/LAMP1
GO_REGULATION_OF_T_CELL_DIFFERENTIATION_IN_THYMUS	GO_REGULATION_OF_T_CELL_DIFFERENTIATION_IN_THYMUS	22	0.82609	1.80965	0.00120777	0.017412	0.0137061	4	tags=9%, list=0%, signal=9%	3552/3553	IL1A/IL1B
GO_ASTROCYTE_DIFFERENTIATION	GO_ASTROCYTE_DIFFERENTIATION	63	0.682534	1.75079	0.00123215	0.0176721	0.0139109	2391	tags=38%, list=16%, signal=32%	3553/7124/3976/3458/6774/4851/2043/2358/650/25/3949/7431/4763/28514/5663/135/6279/6886/3398/3845/4152/351/79809/5781	IL1B/TNF/LIF/IFNG/STAT3/NOTCH1/EPHA4/FPR2/BMP2/ABL1/LDLR/VIM/NF1/DLL1/PSEN1/ADORA2A/S100A8/TAL1/ID2/KRAS/MBD1/APP/TTC21B/PTPN11
GO_REGULATION_OF_MUSCLE_CONTRACTION	GO_REGULATION_OF_MUSCLE_CONTRACTION	115	0.610197	1.6802	0.00123338	0.0176721	0.0139109	594	tags=14%, list=4%, signal=13%	5743/10203/6547/1906/9732/6752/5142/3759/151/8877/1193/136/490/80149/9446/5144	PTGS2/CALCRL/SLC8A3/EDN1/DOCK4/SSTR2/PDE4B/KCNJ2/ADRA2B/SPHK1/CLIC2/ADORA2B/ATP2B1/ZC3H12A/GSTO1/PDE4D
GO_TISSUE_REMODELING	GO_TISSUE_REMODELING	124	0.600686	1.66695	0.00124239	0.0177469	0.0139697	1444	tags=19%, list=9%, signal=18%	3552/9464/26585/51561/4323/6714/7128/7076/1636/3976/558/101/7037/64114/7107/760/10512/659/4763/7040/4853/1464/169200/6696	IL1A/HAND2/GREM1/IL23A/MMP14/SRC/TNFAIP3/TIMP1/ACE/LIF/AXL/ADAM8/TFRC/TMBIM1/GPR137B/CA2/SEMA3C/BMPR2/NF1/TGFB1/NOTCH2/CSPG4/TMEM64/SPP1
GO_REGULATION_OF_SIGNALING_RECEPTOR_ACTIVITY	GO_REGULATION_OF_SIGNALING_RECEPTOR_ACTIVITY	116	0.608129	1.67609	0.00125491	0.0178707	0.0140672	1464	tags=18%, list=10%, signal=16%	26585/2069/9052/6347/3586/9456/5328/151/6714/57732/2100/8787/5144/3458/7251/6536/3688/4043/5663/5469/4885	GREM1/EREG/GPRC5A/CCL2/IL10/HOMER1/PLAU/ADRA2B/SRC/ZFYVE28/ESR2/RGS9/PDE4D/IFNG/TSG101/SLC6A9/ITGB1/LRPAP1/PSEN1/MED1/NPTX2
GO_CARBOHYDRATE_TRANSMEMBRANE_TRANSPORT	GO_CARBOHYDRATE_TRANSMEMBRANE_TRANSPORT	85	0.643743	1.71395	0.00125872	0.0178707	0.0140672	1139	tags=29%, list=7%, signal=27%	3553/6506/718/8013/1906/7124/6515/4780/151176/3099/57761/6513/11182/144195/5467/79602/7525/6518/114882/10580/8682/83667/55829/5906/6517	IL1B/SLC1A2/C3/NR4A3/EDN1/TNF/SLC2A3/NFE2L2/ERFE/HK2/TRIB3/SLC2A1/SLC2A6/SLC2A14/PPARD/ADIPOR2/YES1/SLC2A5/OSBPL8/SORBS1/PEA15/SESN2/SELENOS/RAP1A/SLC2A4
GO_ENDOCRINE_SYSTEM_DEVELOPMENT	GO_ENDOCRINE_SYSTEM_DEVELOPMENT	74	0.660057	1.7285	0.00127493	0.0180461	0.0142052	1313	tags=19%, list=9%, signal=17%	84504/3642/7490/654/8854/2624/7046/84159/8820/2696/650/4763/28514/7474	NKX6-2/INSM1/WT1/BMP6/ALDH1A2/GATA2/TGFBR1/ARID5B/HESX1/GIPR/BMP2/NF1/DLL1/WNT5A
GO_RESPONSE_TO_GONADOTROPIN	GO_RESPONSE_TO_GONADOTROPIN	21	0.829617	1.80516	0.00129215	0.0182345	0.0143536	1061	tags=33%, list=7%, signal=31%	2706/7490/3383/4851/2729/3157/5447	GJB2/WT1/ICAM1/NOTCH1/GCLC/HMGCS1/POR
GO_REGULATION_OF_ORGANIC_ACID_TRANSPORT	GO_REGULATION_OF_ORGANIC_ACID_TRANSPORT	43	0.73401	1.78427	0.00130264	0.0183272	0.0144265	1949	tags=37%, list=13%, signal=33%	3553/1906/7057/151176/6860/551/124935/3688/4923/5663/135/8564/2170/22930/6812/5025	IL1B/EDN1/THBS1/ERFE/SYT4/AVP/SLC43A2/ITGB1/NTSR1/PSEN1/ADORA2A/KMO/FABP3/RAB3GAP1/STXBP1/P2RX4
GO_REGULATION_OF_DEFENSE_RESPONSE_TO_VIRUS_BY_HOST	GO_REGULATION_OF_DEFENSE_RESPONSE_TO_VIRUS_BY_HOST	36	0.756085	1.78881	0.00131397	0.018431	0.0145083	772	tags=28%, list=5%, signal=26%	3553/51561/23586/151636/6772/7128/10758/80149/83666/58515	IL1B/IL23A/DDX58/DTX3L/STAT1/TNFAIP3/TRAF3IP2/ZC3H12A/PARP9/SELENOK
GO_REGULATION_OF_PEPTIDYL_TYROSINE_PHOSPHORYLATION	GO_REGULATION_OF_PEPTIDYL_TYROSINE_PHOSPHORYLATION	200	0.548118	1.58202	0.00134978	0.0188604	0.0148463	1853	tags=21%, list=12%, signal=19%	3589/26585/2069/9052/51561/654/3383/941/8651/7124/64092/6714/57732/960/7422/8784/1636/3976/83666/3458/7525/6774/7251/5770/2043/30844/9021/25/7040/5663/1464/5795/80851/9467/5168/56034/5008/5154/6868/6886/54625/57091	IL11/GREM1/EREG/GPRC5A/IL23A/BMP6/ICAM1/CD80/SOCS1/TNF/NA/SRC/ZFYVE28/CD44/VEGFA/TNFRSF18/ACE/LIF/PARP9/IFNG/YES1/STAT3/TSG101/PTPN1/EPHA4/EHD4/SOCS3/ABL1/TGFB1/PSEN1/CSPG4/PTPRJ/SH3BP5L/SH3BP5/ENPP2/PDGFC/OSM/PDGFA/ADAM17/TAL1/PARP14/CASS4
GO_POSITIVE_REGULATION_OF_ENDOTHELIAL_CELL_PROLIFERATION	GO_POSITIVE_REGULATION_OF_ENDOTHELIAL_CELL_PROLIFERATION	78	0.653902	1.72306	0.00135265	0.0188604	0.0148463	2981	tags=41%, list=19%, signal=33%	2152/654/441478/3586/8828/79805/7422/2624/116844/57521/7046/6774/650/659/26051/4763/7474/6776/2260/6868/56005/10016/3164/4893/1960/7857/55109/1893/6369/253260/284361/5155	F3/BMP6/NRARP/IL10/NRP2/VASH2/VEGFA/GATA2/LRG1/RPTOR/TGFBR1/STAT3/BMP2/BMPR2/PPP1R16B/NF1/WNT5A/STAT5A/FGFR1/ADAM17/MYDGF/PDCD6/NR4A1/NRAS/EGR3/SCG2/AGGF1/ECM1/CCL24/RICTOR/EMC10/PDGFB
GO_ORGANIC_ACID_BIOSYNTHETIC_PROCESS	GO_ORGANIC_ACID_BIOSYNTHETIC_PROCESS	269	0.518618	1.52458	0.00136006	0.0189072	0.0148831	1631	tags=16%, list=11%, signal=15%	3553/5743/10394/1906/29940/79993/51733/4790/3036/241/8854/3638/5352/2643/57761/1491/57214/51141/8942/551/8560/79602/11343/11001/11057/10588/5564/54995/2805/4942/9444/7494/157506/10955/7040/134429/1213/8309/1464/5571/114883/55512/51422/5315	IL1B/PTGS2/PRG3/EDN1/DSE/ELOVL7/UPB1/NFKB1/HAS1/ALOX5AP/ALDH1A2/INSIG1/PLOD2/GCH1/TRIB3/CTH/CEMIP/INSIG2/KYNU/AVP/DEGS1/ADIPOR2/MGLL/SLC27A2/ABHD2/MTHFS/PRKAB1/OXSM/GOT1/OAT/QKI/XBP1/RDH10/SERINC3/TGFB1/STARD4/CLTC/ACOX2/CSPG4/PRKAG1/OSBPL9/SMPD3/PRKAG2/PKM
GO_REGULATION_OF_RESPONSE_TO_WOUNDING	GO_REGULATION_OF_RESPONSE_TO_WOUNDING	136	0.584696	1.63645	0.0013747	0.019054	0.0149986	2442	tags=32%, list=16%, signal=27%	5055/2152/1906/5329/7057/7124/3586/4780/7035/5328/84830/7128/56963/1398/2043/8578/50848/3688/7494/135228/81565/23332/114897/6696/10565/6239/23189/5154/83999/5341/5747/5624/9860/2039/199731/8428/4088/4627/538/4067/301/2150/3156	SERPINB2/F3/EDN1/PLAUR/THBS1/TNF/IL10/NFE2L2/TFPI/PLAU/ADTRP/TNFAIP3/RGMA/CRK/EPHA4/SCARF1/F11R/ITGB1/XBP1/CD109/NDEL1/CLASP1/C1QTNF1/SPP1/ARFGEF1/RREB1/KANK1/PDGFA/KREMEN1/PLEK/PTK2/PROC/LRIG2/DMTN/CADM4/STK24/SMAD3/MYH9/ATP7A/LYN/ANXA1/F2RL1/HMGCR
GO_HORMONE_TRANSPORT	GO_HORMONE_TRANSPORT	229	0.533692	1.55443	0.00138295	0.0191117	0.015044	2472	tags=24%, list=16%, signal=20%	3553/3557/3589/1906/28231/55638/654/8140/338442/7124/10815/8111/56729/6513/26251/3976/773/2182/5467/3458/2696/117247/2029/9024/6845/5906/6616/3625/5798/114897/6696/51762/55512/5008/388581/2260/25874/4856/6814/1428/7036/6717/64855/27230/353500/51083/4067/23568/2867/7849/5781/301/3156/3382	IL1B/IL1RN/IL11/EDN1/SLCO4A1/SYBU/BMP6/SLC7A5/HCAR2/TNF/CPLX1/GPR68/RETN/SLC2A1/KCNG2/LIF/CACNA1A/ACSL4/PPARD/IFNG/GIPR/SLC16A10/ENSA/BRSK2/VAMP7/RAP1A/SNAP25/INHBB/PTPRN/C1QTNF1/SPP1/RAB8B/SMPD3/OSM/C1QTNF12/FGFR1/MPC2/CCN3/STXBP3/CRYM/TFR2/SRI/NIBAN2/SERP1/BMP8A/GAL/LYN/ARL2BP/FFAR2/PAX8/PTPN11/ANXA1/HMGCR/ICA1
GO_REGULATION_OF_LEUKOCYTE_MEDIATED_IMMUNITY	GO_REGULATION_OF_LEUKOCYTE_MEDIATED_IMMUNITY	186	0.554273	1.59159	0.00139539	0.0192186	0.0151282	1483	tags=19%, list=10%, signal=17%	3553/718/3554/51561/5272/3383/114548/7124/7098/3586/84868/23586/7133/136/2624/148022/10892/7037/1398/30817/6830/4049/6845/7855/53833/7040/81545/3105/55183/8772/4068/10125/7186/3902/3140	IL1B/C3/IL1R1/IL23A/SERPINB9/ICAM1/NLRP3/TNF/TLR3/IL10/HAVCR2/DDX58/TNFRSF1B/ADORA2B/GATA2/TICAM1/MALT1/TFRC/CRK/ADGRE2/SUPT6H/LTA/VAMP7/FZD5/IL20RB/TGFB1/FBXO38/HLA-A/RIF1/FADD/SH2D1A/RASGRP1/TRAF2/LAG3/MR1
GO_REGULATION_OF_CD4_POSITIVE_ALPHA_BETA_T_CELL_ACTIVATION	GO_REGULATION_OF_CD4_POSITIVE_ALPHA_BETA_T_CELL_ACTIVATION	56	0.696273	1.75858	0.00140232	0.0192186	0.0151282	1857	tags=32%, list=12%, signal=28%	29126/384/51561/114548/941/8651/80149/10892/1604/3458/64332/57045/54542/9308/246778/864/861/3566	CD274/ARG2/IL23A/NLRP3/CD80/SOCS1/ZC3H12A/MALT1/CD55/IFNG/NFKBIZ/TWSG1/RC3H2/CD83/IL27/RUNX3/NA/IL4R
GO_METANEPHRIC_NEPHRON_DEVELOPMENT	GO_METANEPHRIC_NEPHRON_DEVELOPMENT	24	0.809951	1.79977	0.00140479	0.0192186	0.0151282	463	tags=21%, list=3%, signal=20%	26585/7490/5979/6772/3976	GREM1/WT1/RET/STAT1/LIF
GO_RESPONSE_TO_ESTRADIOL	GO_RESPONSE_TO_ESTRADIOL	104	0.61914	1.68797	0.00140751	0.0192186	0.0151282	742	tags=13%, list=5%, signal=13%	2706/5743/6752/9915/8854/3586/7035/595/2100/8787/29966/8837/836/6774	GJB2/PTGS2/SSTR2/ARNT2/ALDH1A2/IL10/TFPI/CCND1/ESR2/RGS9/STRN3/CFLAR/CASP3/STAT3
GO_POSITIVE_REGULATION_OF_ADAPTIVE_IMMUNE_RESPONSE	GO_POSITIVE_REGULATION_OF_ADAPTIVE_IMMUNE_RESPONSE	97	0.625029	1.69056	0.00141125	0.0192186	0.0151282	1483	tags=21%, list=10%, signal=19%	3553/29126/718/3554/51561/114548/941/7124/10892/7037/64332/4049/7855/7040/81545/3105/55183/8772/7186/3140	IL1B/CD274/C3/IL1R1/IL23A/NLRP3/CD80/TNF/MALT1/TFRC/NFKBIZ/LTA/FZD5/TGFB1/FBXO38/HLA-A/RIF1/FADD/TRAF2/MR1
GO_DEFENSE_RESPONSE_TO_GRAM_NEGATIVE_BACTERIUM	GO_DEFENSE_RESPONSE_TO_GRAM_NEGATIVE_BACTERIUM	35	0.759285	1.78926	0.00142074	0.0192915	0.0151856	534	tags=20%, list=3%, signal=19%	6037/671/51561/1511/1991/820/10133	RNASE3/BPI/IL23A/CTSG/ELANE/CAMP/OPTN
GO_FOREBRAIN_DEVELOPMENT	GO_FOREBRAIN_DEVELOPMENT	283	0.51378	1.51386	0.00143773	0.0194656	0.0153226	1452	tags=16%, list=9%, signal=15%	23657/6506/8013/6547/597/7471/547/664/85458/6752/9638/8854/8828/22809/6497/6714/80055/23135/6513/140679/558/2624/4642/57688/8482/9839/836/23603/4851/8820/57045/1267/1398/8650/57178/650/100996717/54149/10371/4763/9693/5663/7474/81565/81853/5048	SLC7A11/SLC1A2/NR4A3/SLC8A3/BCL2A1/WNT1/KIF1A/BNIP3/DIXDC1/SSTR2/NA/ALDH1A2/NRP2/ATF5/SKI/SRC/PGAP1/KDM6B/SLC2A1/SLC32A1/AXL/GATA2/MYO1D/ZSWIM6/SEMA7A/ZEB2/CASP3/CORO1C/NOTCH1/HESX1/TWSG1/CNP/CRK/NUMB/ZMIZ1/BMP2/NOTCH2NLC/C21orf91/SEMA3A/NF1/RAPGEF2/PSEN1/WNT5A/NDEL1/TMEM14B/PAFAH1B1
GO_REGULATION_OF_HORMONE_LEVELS	GO_REGULATION_OF_HORMONE_LEVELS	347	0.495806	1.4756	0.00145461	0.0196373	0.0154578	1908	tags=17%, list=12%, signal=15%	3553/3557/3589/1577/1906/1511/28231/55638/654/1514/8140/338442/1717/7124/8854/10815/8111/1889/56729/6513/1636/26251/3976/773/2182/5467/3458/5045/2696/117247/2029/9024/650/6845/5447/83930/5906/6616/157506/3625/5798/114897/5469/6696/10269/51762/55512/5008/388581/2260/476/25874/3416/4856/147015/6814/1428/10159/8879/84649	IL1B/IL1RN/IL11/CYP3A5/EDN1/CTSG/SLCO4A1/SYBU/BMP6/CTSL/SLC7A5/HCAR2/DHCR7/TNF/ALDH1A2/CPLX1/GPR68/ECE1/RETN/SLC2A1/ACE/KCNG2/LIF/CACNA1A/ACSL4/PPARD/IFNG/FURIN/GIPR/SLC16A10/ENSA/BRSK2/BMP2/VAMP7/POR/STARD3NL/RAP1A/SNAP25/RDH10/INHBB/PTPRN/C1QTNF1/MED1/SPP1/ZMPSTE24/RAB8B/SMPD3/OSM/C1QTNF12/FGFR1/ATP1A1/MPC2/IDE/CCN3/DHRS13/STXBP3/CRYM/ATP6AP2/SGPL1/DGAT2
GO_I_KAPPAB_KINASE_NF_KAPPAB_SIGNALING	GO_I_KAPPAB_KINASE_NF_KAPPAB_SIGNALING	260	0.519542	1.52427	0.00149099	0.0200704	0.0157987	1567	tags=19%, list=10%, signal=17%	3553/3656/24138/7185/356/7124/7098/1236/10318/6737/330/329/6772/7128/1491/10758/8743/10133/56957/79155/80149/148022/10892/10010/7187/7037/5966/54602/8837/64343/27032/9516/23118/7706/257397/5971/4792/10769/25/4615/85363/7474/8772/8878/7186/3654/8795/23476/28511	IL1B/IRAK2/IFIT5/TRAF1/FASLG/TNF/TLR3/CCR7/TNIP1/TRIM21/BIRC3/BIRC2/STAT1/TNFAIP3/CTH/TRAF3IP2/TNFSF10/OPTN/OTUD7B/TNIP2/ZC3H12A/TICAM1/MALT1/TANK/TRAF3/TFRC/REL/NDFIP2/CFLAR/AZI2/ATP2C1/LITAF/TAB2/TRIM25/TAB3/RELB/NFKBIA/PLK2/ABL1/MYD88/TRIM5/WNT5A/FADD/SQSTM1/TRAF2/IRAK1/TNFRSF10B/BRD4/NKIRAS2
GO_POSITIVE_REGULATION_OF_PROTEIN_KINASE_ACTIVITY	GO_POSITIVE_REGULATION_OF_PROTEIN_KINASE_ACTIVITY	454	0.474911	1.42508	0.00151464	0.0203302	0.0160032	1853	tags=20%, list=12%, signal=18%	3553/26585/23566/2069/3656/9052/51561/2321/1906/1991/7057/8651/1435/7124/7098/5979/1236/595/6385/151/6714/5291/7422/1326/136/1636/57214/4914/10892/51776/9839/101/9175/3458/57521/7046/1398/5770/114882/2043/5610/25994/5716/9966/2081/23118/2889/650/7042/257397/8682/151195/7855/94056/5906/25/5063/2180/9693/7040/9043/6416/23533/3937/5663/7474/10125/1464/7186/3654/9448/5571/8795/56034/51422/11235/4515/…	IL1B/GREM1/LPAR3/EREG/IRAK2/GPRC5A/IL23A/FLT1/EDN1/ELANE/THBS1/SOCS1/CSF1/TNF/TLR3/RET/CCR7/CCND1/SDC4/ADRA2B/SRC/PIK3CB/VEGFA/MAP3K8/ADORA2B/ACE/CEMIP/NTRK1/MALT1/MAP3K20/ZEB2/ADAM8/MAP3K13/IFNG/RPTOR/TGFBR1/CRK/PTPN1/OSBPL8/EPHA4/EIF2AK2/HIGD1A/PSMD10/TNFSF15/ERN1/TAB2/RAPGEF1/BMP2/TGFB2/TAB3/PEA15/CCNYL1/FZD5/SYAP1/RAP1A/ABL1/PAK3/ACSL1/RAPGEF2/TGFB1/SPAG9/MAP2K4/PIK3R5/LCP2/PSEN1/WNT5A/RASGRP…
GO_POSITIVE_REGULATION_OF_HUMORAL_IMMUNE_RESPONSE	GO_POSITIVE_REGULATION_OF_HUMORAL_IMMUNE_RESPONSE	10	0.90816	1.74799	0.00157049	0.0209593	0.0164984	272	tags=40%, list=2%, signal=39%	3553/718/7124/1236	IL1B/C3/TNF/CCR7
GO_POSITIVE_REGULATION_OF_T_CELL_DIFFERENTIATION_IN_THYMUS	GO_POSITIVE_REGULATION_OF_T_CELL_DIFFERENTIATION_IN_THYMUS	10	0.908061	1.7478	0.00157049	0.0209593	0.0164984	4	tags=20%, list=0%, signal=20%	3552/3553	IL1A/IL1B
GO_TYPE_I_INTERFERON_PRODUCTION	GO_TYPE_I_INTERFERON_PRODUCTION	120	0.597651	1.65286	0.00165743	0.022039	0.0173483	2180	tags=31%, list=14%, signal=27%	9636/64135/4790/7098/3586/4791/84868/23586/6737/79132/6772/7128/3665/148022/3659/7187/10211/5966/9111/64343/3428/51191/7706/5971/54476/4615/8887/3654/64771/9208/83737/115004/5440/2547/7097/11128/170506	ISG15/IFIH1/NFKB1/TLR3/IL10/NFKB2/HAVCR2/DDX58/TRIM21/DHX58/STAT1/TNFAIP3/IRF7/TICAM1/IRF1/TRAF3/FLOT1/REL/NMI/AZI2/IFI16/HERC5/TRIM25/RELB/RNF216/MYD88/TAX1BP1/IRAK1/ILRUN/LRRFIP1/ITCH/CGAS/POLR2K/XRCC6/TLR2/POLR3A/DHX36
GO_LIPID_EXPORT_FROM_CELL	GO_LIPID_EXPORT_FROM_CELL	27	0.789527	1.78732	0.00166083	0.022039	0.0173483	399	tags=15%, list=3%, signal=14%	3553/1906/654/56729	IL1B/EDN1/BMP6/RETN
GO_REGULATION_OF_OSSIFICATION	GO_REGULATION_OF_OSSIFICATION	154	0.56969	1.6127	0.00170973	0.0225787	0.0177731	1784	tags=19%, list=12%, signal=17%	9464/6348/26585/9636/654/1435/5552/7124/6497/490/22856/4851/57045/650/7042/659/7040/92/7474/54880/169200/10269/1192/9260/83999/5747/3516/56172/8519	HAND2/CCL3/GREM1/ISG15/BMP6/CSF1/SRGN/TNF/SKI/ATP2B1/CHSY1/NOTCH1/TWSG1/BMP2/TGFB2/BMPR2/TGFB1/ACVR2A/WNT5A/BCOR/TMEM64/ZMPSTE24/CLIC1/PDLIM7/KREMEN1/PTK2/RBPJ/ANKH/IFITM1
GO_FATTY_ACID_DERIVATIVE_BIOSYNTHETIC_PROCESS	GO_FATTY_ACID_DERIVATIVE_BIOSYNTHETIC_PROCESS	76	0.65163	1.71156	0.00171117	0.0225787	0.0177731	626	tags=11%, list=4%, signal=10%	3553/5743/10394/1906/79993/241/551/2182	IL1B/PTGS2/PRG3/EDN1/ELOVL7/ALOX5AP/AVP/ACSL4
GO_REGULATION_OF_FATTY_ACID_TRANSPORT	GO_REGULATION_OF_FATTY_ACID_TRANSPORT	22	0.818014	1.79196	0.00171875	0.0226148	0.0178016	304	tags=18%, list=2%, signal=18%	3553/1906/7057/151176	IL1B/EDN1/THBS1/ERFE
GO_POSITIVE_REGULATION_OF_VASOCONSTRICTION	GO_POSITIVE_REGULATION_OF_VASOCONSTRICTION	19	0.83536	1.78674	0.00173811	0.0228054	0.0179516	583	tags=21%, list=4%, signal=20%	5743/3269/3383/551	PTGS2/HRH1/ICAM1/AVP
GO_NEUTROPHIL_HOMEOSTASIS	GO_NEUTROPHIL_HOMEOSTASIS	15	0.863697	1.77474	0.00177311	0.0231994	0.0182617	560	tags=33%, list=4%, signal=32%	23657/338442/5142/5291/558	SLC7A11/HCAR2/PDE4B/PIK3CB/AXL
GO_REGULATION_OF_CALCIUM_ION_TRANSPORT	GO_REGULATION_OF_CALCIUM_ION_TRANSPORT	184	0.549948	1.57765	0.00178255	0.0232578	0.0183077	594	tags=10%, list=4%, signal=10%	5743/6348/6351/23566/255057/5031/4283/2669/6347/3383/5142/9456/1193/57214/8787/490/5371/9446/5144	PTGS2/CCL3/CCL4/LPAR3/CBARP/P2RY6/CXCL9/GEM/CCL2/ICAM1/PDE4B/HOMER1/CLIC2/CEMIP/RGS9/ATP2B1/PML/GSTO1/PDE4D
GO_TOLERANCE_INDUCTION	GO_TOLERANCE_INDUCTION	24	0.804088	1.78674	0.00181707	0.0236422	0.0186103	418	tags=25%, list=3%, signal=24%	3559/29126/1233/84868/29851/7128	IL2RA/CD274/CCR4/HAVCR2/ICOS/TNFAIP3
GO_POSITIVE_REGULATION_OF_P38MAPK_CASCADE	GO_POSITIVE_REGULATION_OF_P38MAPK_CASCADE	23	0.808012	1.78441	0.00185757	0.0240653	0.0189433	563	tags=22%, list=4%, signal=21%	3553/9464/8877/7422/80149	IL1B/HAND2/SPHK1/VEGFA/ZC3H12A
GO_ALPHA_BETA_T_CELL_ACTIVATION_INVOLVED_IN_IMMUNE_RESPONSE	GO_ALPHA_BETA_T_CELL_ACTIVATION_INVOLVED_IN_IMMUNE_RESPONSE	55	0.693061	1.7457	0.0018599	0.0240653	0.0189433	2480	tags=40%, list=16%, signal=34%	51561/114548/941/10538/1880/80149/10892/3458/6774/64332/5971/54542/161882/246778/602/3566/6095/3718/7292/538/301/5734	IL23A/NLRP3/CD80/BATF/GPR183/ZC3H12A/MALT1/IFNG/STAT3/NFKBIZ/RELB/RC3H2/ZFPM1/IL27/BCL3/IL4R/RORA/JAK3/TNFSF4/ATP7A/ANXA1/PTGER4
GO_T_CELL_MEDIATED_IMMUNITY	GO_T_CELL_MEDIATED_IMMUNITY	91	0.625332	1.67922	0.00186517	0.0240669	0.0189446	1483	tags=22%, list=10%, signal=20%	3553/3554/51561/970/3383/114548/7133/23180/10892/1604/163486/7855/53833/81545/3105/64005/8772/7186/5873/3140	IL1B/IL1R1/IL23A/CD70/ICAM1/NLRP3/TNFRSF1B/RFTN1/MALT1/CD55/DENND1B/FZD5/IL20RB/FBXO38/HLA-A/MYO1G/FADD/TRAF2/RAB27A/MR1
GO_CELLULAR_OXIDANT_DETOXIFICATION	GO_CELLULAR_OXIDANT_DETOXIFICATION	79	0.644171	1.69978	0.00188741	0.0242867	0.0191176	1264	tags=22%, list=8%, signal=20%	5743/8288/6648/7124/241/4780/1193/2643/140809/9446/25824/83667/55829/119391/10516/7296/2882	PTGS2/EPX/SOD2/TNF/ALOX5AP/NFE2L2/CLIC2/GCH1/SRXN1/GSTO1/PRDX5/SESN2/SELENOS/GSTO2/FBLN5/TXNRD1/GPX7
GO_CD4_POSITIVE_ALPHA_BETA_T_CELL_CYTOKINE_PRODUCTION	GO_CD4_POSITIVE_ALPHA_BETA_T_CELL_CYTOKINE_PRODUCTION	17	0.849175	1.78196	0.00190053	0.0243884	0.0191976	967	tags=29%, list=6%, signal=28%	3553/3554/114548/1604/163486	IL1B/IL1R1/NLRP3/CD55/DENND1B
GO_T_HELPER_1_TYPE_IMMUNE_RESPONSE	GO_T_HELPER_1_TYPE_IMMUNE_RESPONSE	39	0.739207	1.77085	0.00191388	0.0244924	0.0192795	724	tags=18%, list=5%, signal=17%	3553/3554/51561/9173/941/84868/10148	IL1B/IL1R1/IL23A/IL1RL1/CD80/HAVCR2/EBI3
GO_POSITIVE_REGULATION_OF_CELL_DEVELOPMENT	GO_POSITIVE_REGULATION_OF_CELL_DEVELOPMENT	435	0.475446	1.42487	0.0019256	0.0245635	0.0193355	1331	tags=15%, list=9%, signal=14%	84504/3553/6348/23566/10562/1906/654/1435/9638/7124/5979/4780/6860/151/7133/8111/7422/6498/440730/3976/4914/4681/2624/27/8482/9839/60436/9175/3458/5034/8837/23011/1809/4851/1398/3987/2803/2043/8650/10512/2889/8578/6935/650/50848/4049/6845/5906/659/25/54149/5063/10371/9693/23327/7040/91752/9043/5468/5584/81545/5663/11075/7474/147040/81565	NKX6-2/IL1B/CCL3/LPAR3/OLFM4/EDN1/BMP6/CSF1/NA/TNF/RET/NFE2L2/SYT4/ADRA2B/TNFRSF1B/GPR68/VEGFA/SKIL/TRIM67/LIF/NTRK1/GATA2/ABL2/SEMA7A/ZEB2/TGIF2/MAP3K13/IFNG/P4HB/CFLAR/RAB21/DPYSL3/NOTCH1/CRK/LIMS1/GOLGA4/EPHA4/NUMB/SEMA3C/RAPGEF1/SCARF1/ZEB1/BMP2/F11R/LTA/VAMP7/RAP1A/BMPR2/ABL1/C21orf91/PAK3/SEMA3A/RAPGEF2/NEDD4L/TGFB1/ZNF804A/SPAG9/PPARG/PRKCI/FBXO38/PSEN1/STMN2/WNT5A/KCTD11/NDEL1
GO_FIBRINOLYSIS	GO_FIBRINOLYSIS	15	0.86236	1.77199	0.00193728	0.0245635	0.0193355	308	tags=27%, list=2%, signal=26%	5055/5329/7057/5328	SERPINB2/PLAUR/THBS1/PLAU
GO_SYMPATHETIC_NERVOUS_SYSTEM_DEVELOPMENT	GO_SYMPATHETIC_NERVOUS_SYSTEM_DEVELOPMENT	15	0.862548	1.77238	0.00193728	0.0245635	0.0193355	1195	tags=40%, list=8%, signal=37%	9464/3642/8828/4914/10371/4763	HAND2/INSM1/NRP2/NTRK1/SEMA3A/NF1
GO_REGULATION_OF_EMBRYONIC_DEVELOPMENT	GO_REGULATION_OF_EMBRYONIC_DEVELOPMENT	101	0.61465	1.67037	0.00194047	0.0245635	0.0193355	1590	tags=26%, list=10%, signal=23%	3557/3908/7471/27330/6615/441478/3586/4780/9334/23187/2624/60436/6996/4155/4851/85407/3955/9320/3909/7289/28514/7474/23332/5048/5598/23432	IL1RN/LAMA2/WNT1/RPS6KA6/SNAI1/NRARP/IL10/NFE2L2/B4GALT5/PHLDB1/GATA2/TGIF2/TDG/MBP/NOTCH1/NKD1/LFNG/TRIP12/LAMA3/TULP3/DLL1/WNT5A/CLASP1/PAFAH1B1/MAPK7/GPR161
GO_POSITIVE_REGULATION_OF_PHAGOCYTOSIS	GO_POSITIVE_REGULATION_OF_PHAGOCYTOSIS	57	0.685802	1.73563	0.00195248	0.0246488	0.0194026	1496	tags=26%, list=10%, signal=24%	3553/718/6347/7124/3601/5806/2624/3458/2358/2889/5906/3560/5468/5873/5795	IL1B/C3/CCL2/TNF/IL15RA/PTX3/GATA2/IFNG/FPR2/RAPGEF1/RAP1A/IL2RB/PPARG/RAB27A/PTPRJ
GO_G_PROTEIN_COUPLED_RECEPTOR_SIGNALING_PATHWAY_COUPLED_TO_CYCLIC_NUCLEOTIDE_SECOND_MESSENGER	GO_G_PROTEIN_COUPLED_RECEPTOR_SIGNALING_PATHWAY_COUPLED_TO_CYCLIC_NUCLEOTIDE_SECOND_MESSENGER	134	0.579878	1.62106	0.00196272	0.0247112	0.0194518	1693	tags=21%, list=11%, signal=19%	23566/5996/4283/3269/10203/6347/1906/6752/151/136/79924/2869/2769/5144/54331/2768/30817/4157/2696/2358/575/9693/7434/23432/135/2774/2773/9495	LPAR3/RGS1/CXCL9/HRH1/CALCRL/CCL2/EDN1/SSTR2/ADRA2B/ADORA2B/ADM2/GRK5/GNA15/PDE4D/GNG2/GNA12/ADGRE2/MC1R/GIPR/FPR2/ADGRB1/RAPGEF2/VIPR2/GPR161/ADORA2A/GNAL/GNAI3/AKAP5
GO_MUSCLE_SYSTEM_PROCESS	GO_MUSCLE_SYSTEM_PROCESS	306	0.503342	1.48987	0.00198927	0.0249782	0.0196619	1724	tags=15%, list=11%, signal=13%	3553/5743/9464/8013/10203/6547/384/1906/9732/1145/6752/5142/3759/9456/7111/151/8877/7133/1193/9150/136/490/80149/9446/5144/8837/4851/6535/10580/103910/7431/23327/6416/2023/55151/6324/444/2010/57817/3720/816/7140/4607/476/5747	IL1B/PTGS2/HAND2/NR4A3/CALCRL/SLC8A3/ARG2/EDN1/DOCK4/CHRNE/SSTR2/PDE4B/KCNJ2/HOMER1/TMOD1/ADRA2B/SPHK1/TNFRSF1B/CLIC2/CTDP1/ADORA2B/ATP2B1/ZC3H12A/GSTO1/PDE4D/CFLAR/NOTCH1/SLC6A8/SORBS1/MYL12B/VIM/NEDD4L/MAP2K4/ENO1/TMEM38B/SCN1B/ASPH/EMD/HAMP/JARID2/CAMK2B/TNNT3/MYBPC3/ATP1A1/PTK2
GO_POSITIVE_REGULATION_OF_ANION_TRANSPORT	GO_POSITIVE_REGULATION_OF_ANION_TRANSPORT	42	0.726592	1.76104	0.00203032	0.0254252	0.0200138	1949	tags=36%, list=13%, signal=31%	3553/1906/151176/6860/551/3688/4923/5243/5663/135/8564/2170/22930/6812/5025	IL1B/EDN1/ERFE/SYT4/AVP/ITGB1/NTSR1/ABCB1/PSEN1/ADORA2A/KMO/FABP3/RAB3GAP1/STXBP1/P2RX4
GO_REGULATION_OF_VASCULAR_ASSOCIATED_SMOOTH_MUSCLE_CELL_PROLIFERATION	GO_REGULATION_OF_VASCULAR_ASSOCIATED_SMOOTH_MUSCLE_CELL_PROLIFERATION	45	0.71732	1.7557	0.00204645	0.0255587	0.0201189	1790	tags=24%, list=12%, signal=22%	5031/6648/8013/1906/7124/3586/2081/5468/27250/2773/2254	P2RY6/SOD2/NR4A3/EDN1/TNF/IL10/ERN1/PPARG/PDCD4/GNAI3/FGF9
GO_KIDNEY_EPITHELIUM_DEVELOPMENT	GO_KIDNEY_EPITHELIUM_DEVELOPMENT	93	0.619122	1.66639	0.00206506	0.0257224	0.0202477	1295	tags=17%, list=8%, signal=16%	26585/384/7490/7471/5979/10409/6385/7422/6772/3976/4851/2043/650/84445/4853/28514	GREM1/ARG2/WT1/WNT1/RET/BASP1/SDC4/VEGFA/STAT1/LIF/NOTCH1/EPHA4/BMP2/LZTS2/NOTCH2/DLL1
GO_CELLULAR_RESPONSE_TO_PEPTIDE	GO_CELLULAR_RESPONSE_TO_PEPTIDE	321	0.497683	1.47644	0.00207529	0.0257811	0.0202939	1913	tags=23%, list=12%, signal=21%	3553/2706/8013/1906/7471/3383/8651/4790/8412/4780/151176/3638/6714/10135/57761/6772/51141/51510/490/773/245973/5641/5872/8837/6774/1398/9663/5770/114882/529/2043/2729/760/10580/2358/2805/9021/55829/5447/7494/94056/7532/6517/7431/3625/4363/5905/1176/324/5468/5584/5908/837/5663/81565/51606/6776/9296/51762/55667/55512/23189/23175/5315/388581/51274/5747/523/5295/3416/55532/10458/528/5286/11031	IL1B/GJB2/NR4A3/EDN1/WNT1/ICAM1/SOCS1/NFKB1/NA/NFE2L2/ERFE/INSIG1/SRC/NAMPT/TRIB3/STAT1/INSIG2/CHMP5/ATP2B1/CACNA1A/ATP6V1C2/LGMN/RAB13/CFLAR/STAT3/CRK/LPIN2/PTPN1/OSBPL8/ATP6V1E1/EPHA4/GCLC/CA2/SORBS1/FPR2/GOT1/SOCS3/SELENOS/POR/XBP1/SYAP1/YWHAG/SLC2A4/VIM/INHBB/ABCC1/RANGAP1/AP3S1/APC/PPARG/PRKCI/RAP1B/CASP4/PSEN1/NDEL1/ATP6V1H/STAT5A/ATP6V1F/RAB8B/DENND4C/SMPD3/KANK1/LPIN1/PKM/C1QTNF12/KLF3/PT…
GO_REGULATION_OF_COAGULATION	GO_REGULATION_OF_COAGULATION	66	0.663569	1.712	0.0020865	0.0258516	0.0203494	401	tags=14%, list=3%, signal=13%	5055/2152/1906/5329/7057/4780/7035/5328/84830	SERPINB2/F3/EDN1/PLAUR/THBS1/NFE2L2/TFPI/PLAU/ADTRP
GO_PLACENTA_DEVELOPMENT	GO_PLACENTA_DEVELOPMENT	117	0.595791	1.64357	0.00209658	0.0258752	0.0203681	1789	tags=22%, list=12%, signal=20%	3696/2706/5743/6615/3586/329/639/79805/3976/2624/22846/5467/51493/682/54583/9021/7855/659/5468/4853/5469/6696/50814/5747/3516/7421	ITGB8/GJB2/PTGS2/SNAI1/IL10/BIRC2/PRDM1/VASH2/LIF/GATA2/VASH1/PPARD/RTCB/BSG/EGLN1/SOCS3/FZD5/BMPR2/PPARG/NOTCH2/MED1/SPP1/NSDHL/PTK2/RBPJ/VDR
GO_REGULATION_OF_NEUTROPHIL_MIGRATION	GO_REGULATION_OF_NEUTROPHIL_MIGRATION	36	0.746063	1.7651	0.00209949	0.0258752	0.0203681	656	tags=17%, list=4%, signal=16%	3576/3554/51561/1906/1236/101	CXCL8/IL1R1/IL23A/EDN1/CCR7/ADAM8
GO_REGULATION_OF_ION_TRANSPORT	GO_REGULATION_OF_ION_TRANSPORT	485	0.465252	1.39865	0.00213868	0.0262821	0.0206883	1917	tags=16%, list=13%, signal=15%	3553/5743/6348/6351/23566/255057/5031/4283/2669/6347/1906/3383/7057/285966/5142/3759/23415/9456/151176/6860/1193/486/26251/57214/9943/8787/8645/57731/490/5371/773/551/9446/5144/3458/6536/124935/760/10105/2040/6845/3688/25/4923/7009/4734/23327/5243/5663/55151/610/54997/6324/283518/10269/1192/7114/57817/51669/162514/135/816/3958/9948/25932/967/81/2260/476/8564/2170/22930/55532/6812/54413/65125/483/…	IL1B/PTGS2/CCL3/CCL4/LPAR3/CBARP/P2RY6/CXCL9/GEM/CCL2/EDN1/ICAM1/THBS1/TCAF2/PDE4B/KCNJ2/KCNH4/HOMER1/ERFE/SYT4/CLIC2/FXYD2/KCNG2/CEMIP/OXSR1/RGS9/KCNK5/SPTBN4/ATP2B1/PML/CACNA1A/AVP/GSTO1/PDE4D/IFNG/SLC6A9/SLC43A2/CA2/PPIF/STOM/VAMP7/ITGB1/ABL1/NTSR1/TMBIM6/NEDD4/NEDD4L/ABCB1/PSEN1/TMEM38B/HCN2/TESC/SCN1B/KCNRG/ZMPSTE24/CLIC1/TMSB4X/HAMP/SARAF/TRPV3/ADORA2A/CAMK2B/LGALS3/WDR1/CLIC4/CD63/ACTN4/FG…
GO_REGULATION_OF_LYMPHOCYTE_MEDIATED_IMMUNITY	GO_REGULATION_OF_LYMPHOCYTE_MEDIATED_IMMUNITY	135	0.576898	1.6138	0.00214376	0.0262821	0.0206883	1483	tags=20%, list=10%, signal=18%	3553/718/3554/51561/5272/114548/7124/3586/84868/7133/10892/7037/1398/6830/4049/7855/53833/7040/81545/3105/55183/8772/4068/10125/7186/3902/3140	IL1B/C3/IL1R1/IL23A/SERPINB9/NLRP3/TNF/IL10/HAVCR2/TNFRSF1B/MALT1/TFRC/CRK/SUPT6H/LTA/FZD5/IL20RB/TGFB1/FBXO38/HLA-A/RIF1/FADD/SH2D1A/RASGRP1/TRAF2/LAG3/MR1
GO_VITAMIN_BIOSYNTHETIC_PROCESS	GO_VITAMIN_BIOSYNTHETIC_PROCESS	18	0.836971	1.77414	0.00215397	0.0263382	0.0207325	686	tags=28%, list=4%, signal=27%	3553/6615/4790/7124/3458	IL1B/SNAI1/NFKB1/TNF/IFNG
GO_POSITIVE_REGULATION_OF_ORGANIC_ACID_TRANSPORT	GO_POSITIVE_REGULATION_OF_ORGANIC_ACID_TRANSPORT	27	0.782456	1.77131	0.00216955	0.0264554	0.0208247	1949	tags=52%, list=13%, signal=45%	3553/1906/151176/6860/551/3688/4923/5663/135/8564/2170/22930/6812/5025	IL1B/EDN1/ERFE/SYT4/AVP/ITGB1/NTSR1/PSEN1/ADORA2A/KMO/FABP3/RAB3GAP1/STXBP1/P2RX4
GO_DEVELOPMENT_OF_PRIMARY_SEXUAL_CHARACTERISTICS	GO_DEVELOPMENT_OF_PRIMARY_SEXUAL_CHARACTERISTICS	165	0.55966	1.59267	0.002175	0.0264554	0.0208247	1383	tags=19%, list=9%, signal=17%	10046/2069/4327/7490/3383/4323/7098/10409/595/6714/7422/56729/5806/4914/8743/8372/5872/836/7046/84159/3955/3157/7042/157506/3625/10371/22862/5798/92/7474/3205	MAMLD1/EREG/MMP19/WT1/ICAM1/MMP14/TLR3/BASP1/CCND1/SRC/VEGFA/RETN/PTX3/NTRK1/TNFSF10/HYAL3/RAB13/CASP3/TGFBR1/ARID5B/LFNG/HMGCS1/TGFB2/RDH10/INHBB/SEMA3A/FNDC3A/PTPRN/ACVR2A/WNT5A/HOXA9
GO_RESPONSE_TO_LEPTIN	GO_RESPONSE_TO_LEPTIN	19	0.830775	1.77693	0.00218054	0.0264554	0.0208247	1173	tags=32%, list=8%, signal=29%	8013/1906/595/10148/6774/3625	NR4A3/EDN1/CCND1/EBI3/STAT3/INHBB
GO_PROSTANOID_METABOLIC_PROCESS	GO_PROSTANOID_METABOLIC_PROCESS	38	0.739091	1.76298	0.00219249	0.0265314	0.0208845	583	tags=11%, list=4%, signal=10%	3553/5743/1906/551	IL1B/PTGS2/EDN1/AVP
GO_NEGATIVE_REGULATION_OF_VIRAL_TRANSCRIPTION	GO_NEGATIVE_REGULATION_OF_VIRAL_TRANSCRIPTION	25	0.793029	1.7743	0.00222808	0.026864	0.0211463	341	tags=12%, list=2%, signal=12%	6348/6351/6737	CCL3/CCL4/TRIM21
GO_CELLULAR_RESPONSE_TO_CORTICOSTEROID_STIMULUS	GO_CELLULAR_RESPONSE_TO_CORTICOSTEROID_STIMULUS	48	0.706889	1.74532	0.00223147	0.026864	0.0211463	986	tags=19%, list=6%, signal=18%	2706/1906/3383/6752/54541/490/2908/8837/2235	GJB2/EDN1/ICAM1/SSTR2/DDIT4/ATP2B1/NR3C1/CFLAR/FECH
GO_POSITIVE_REGULATION_OF_SMOOTH_MUSCLE_CONTRACTION	GO_POSITIVE_REGULATION_OF_SMOOTH_MUSCLE_CONTRACTION	22	0.811204	1.77704	0.00226069	0.0271063	0.0213371	359	tags=18%, list=2%, signal=18%	5743/1906/151/8877	PTGS2/EDN1/ADRA2B/SPHK1
GO_NEGATIVE_REGULATION_OF_COAGULATION	GO_NEGATIVE_REGULATION_OF_COAGULATION	38	0.737897	1.76013	0.00226321	0.0271063	0.0213371	401	tags=18%, list=3%, signal=18%	5055/1906/5329/7057/7035/5328/84830	SERPINB2/EDN1/PLAUR/THBS1/TFPI/PLAU/ADTRP
GO_REGULATION_OF_MAP_KINASE_ACTIVITY	GO_REGULATION_OF_MAP_KINASE_ACTIVITY	287	0.504562	1.4879	0.00229533	0.0274207	0.0215846	1712	tags=21%, list=11%, signal=19%	3553/23566/3656/80824/2321/1906/1846/1991/7057/7124/5979/151/6714/5291/57761/7422/1326/1844/136/4914/200734/51776/9839/101/9175/7046/7251/1398/5770/2043/5610/2081/23118/2889/650/257397/8682/7855/54900/5063/4763/7040/9043/6416/23533/5663/7474/27250/10125/1464/7186/3654/11072/5795/56034/11235/8649/5154/1848/7984/2260	IL1B/LPAR3/IRAK2/DUSP16/FLT1/EDN1/DUSP4/ELANE/THBS1/TNF/RET/ADRA2B/SRC/PIK3CB/TRIB3/VEGFA/MAP3K8/DUSP2/ADORA2B/NTRK1/SPRED2/MAP3K20/ZEB2/ADAM8/MAP3K13/TGFBR1/TSG101/CRK/PTPN1/EPHA4/EIF2AK2/ERN1/TAB2/RAPGEF1/BMP2/TAB3/PEA15/FZD5/LAX1/PAK3/NF1/TGFB1/SPAG9/MAP2K4/PIK3R5/PSEN1/WNT5A/PDCD4/RASGRP1/CSPG4/TRAF2/IRAK1/DUSP14/PTPRJ/PDGFC/PDCD10/LAMTOR3/PDGFA/DUSP6/ARHGEF5/FGFR1
GO_POSITIVE_REGULATION_OF_EPITHELIAL_CELL_PROLIFERATION	GO_POSITIVE_REGULATION_OF_EPITHELIAL_CELL_PROLIFERATION	146	0.56847	1.60118	0.00231392	0.0275723	0.0217039	2981	tags=34%, list=19%, signal=27%	2152/8013/654/441478/3586/8828/595/79805/7422/7128/2624/116844/57521/8837/7046/6774/4851/650/7494/659/26051/4763/5798/4853/7474/5469/6776/6239/2260/6868/2254/56005/57343/10016/538/3164/2683/64127/4893/1960/7857/55109/1893/57142/374/6369/253260/284361/5155	F3/NR4A3/BMP6/NRARP/IL10/NRP2/CCND1/VASH2/VEGFA/TNFAIP3/GATA2/LRG1/RPTOR/CFLAR/TGFBR1/STAT3/NOTCH1/BMP2/XBP1/BMPR2/PPP1R16B/NF1/PTPRN/NOTCH2/WNT5A/MED1/STAT5A/RREB1/FGFR1/ADAM17/FGF9/MYDGF/ZNF304/PDCD6/ATP7A/NR4A1/B4GALT1/NOD2/NRAS/EGR3/SCG2/AGGF1/ECM1/RTN4/AREG/CCL24/RICTOR/EMC10/PDGFB
GO_NEGATIVE_REGULATION_OF_INTERFERON_GAMMA_PRODUCTION	GO_NEGATIVE_REGULATION_OF_INTERFERON_GAMMA_PRODUCTION	26	0.785834	1.76762	0.00235092	0.0278558	0.0219271	563	tags=23%, list=4%, signal=22%	29126/9173/3586/84868/558/80149	CD274/IL1RL1/IL10/HAVCR2/AXL/ZC3H12A
GO_PROSTAGLANDIN_TRANSPORT	GO_PROSTAGLANDIN_TRANSPORT	12	0.882585	1.74769	0.00235222	0.0278558	0.0219271	150	tags=17%, list=1%, signal=17%	3553/1906	IL1B/EDN1
GO_MULTICELLULAR_ORGANISMAL_HOMEOSTASIS	GO_MULTICELLULAR_ORGANISMAL_HOMEOSTASIS	384	0.480925	1.43619	0.00235815	0.0278558	0.0219271	1628	tags=15%, list=11%, signal=14%	3552/3553/5743/8013/84251/3908/654/64116/1435/7124/9456/284207/57406/6714/7422/7128/23135/6513/79888/2624/551/25861/79602/101/4645/7037/4155/57482/6774/4851/4891/7107/760/5564/4520/50848/3688/43/4923/128866/53833/2180/51542/4763/9807/324/28514/169200/6005/6696/272/57817/3934/56034/29887/23175/26058	IL1A/IL1B/PTGS2/NR4A3/SGIP1/LAMA2/BMP6/SLC39A8/CSF1/TNF/HOMER1/METRNL/ABHD6/SRC/VEGFA/TNFAIP3/KDM6B/SLC2A1/LPCAT1/GATA2/AVP/WHRN/ADIPOR2/ADAM8/MYO5B/TFRC/MBP/CRACD/STAT3/NOTCH1/SLC11A2/GPR137B/CA2/PRKAB1/MTF1/F11R/ITGB1/ACHE/NTSR1/CHMP4B/IL20RB/ACSL1/VPS54/NF1/IP6K1/APC/DLL1/TMEM64/RHAG/SPP1/AMPD3/HAMP/LCN2/PDGFC/SNX10/LPIN1/GIGYF2
GO_RESPONSE_TO_DEXAMETHASONE	GO_RESPONSE_TO_DEXAMETHASONE	31	0.762196	1.7625	0.00236157	0.0278558	0.0219271	986	tags=23%, list=6%, signal=21%	2706/1906/3383/54541/2908/8837/2235	GJB2/EDN1/ICAM1/DDIT4/NR3C1/CFLAR/FECH
GO_POSITIVE_REGULATION_OF_LIPID_METABOLIC_PROCESS	GO_POSITIVE_REGULATION_OF_LIPID_METABOLIC_PROCESS	113	0.59452	1.63409	0.00239153	0.0280714	0.0220968	1253	tags=19%, list=8%, signal=18%	3553/5743/8013/2321/654/7124/1236/57406/6714/551/5467/3458/30849/10580/2358/55626/5447/3949/157506/7040/134429/5468	IL1B/PTGS2/NR4A3/FLT1/BMP6/TNF/CCR7/ABHD6/SRC/AVP/PPARD/IFNG/PIK3R4/SORBS1/FPR2/AMBRA1/POR/LDLR/RDH10/TGFB1/STARD4/PPARG
GO_LIPOPOLYSACCHARIDE_MEDIATED_SIGNALING_PATHWAY	GO_LIPOPOLYSACCHARIDE_MEDIATED_SIGNALING_PATHWAY	53	0.692637	1.73582	0.00239186	0.0280714	0.0220968	610	tags=21%, list=4%, signal=20%	3553/6348/3656/6347/671/654/7124/7128/148022/10892/1604	IL1B/CCL3/IRAK2/CCL2/BPI/BMP6/TNF/TNFAIP3/TICAM1/MALT1/CD55
GO_RESPONSE_TO_NICOTINE	GO_RESPONSE_TO_NICOTINE	32	0.759264	1.76415	0.0024082	0.0281922	0.0221919	725	tags=22%, list=5%, signal=21%	23657/1906/4790/7124/4914/551/836	SLC7A11/EDN1/NFKB1/TNF/NTRK1/AVP/CASP3
GO_CONNECTIVE_TISSUE_DEVELOPMENT	GO_CONNECTIVE_TISSUE_DEVELOPMENT	198	0.537458	1.5504	0.00241798	0.0282187	0.0222127	2485	tags=26%, list=16%, signal=22%	3696/9464/26585/1906/7490/654/6615/1435/960/7076/50515/7227/8372/22856/5467/8837/7046/4851/84159/54928/6935/650/5447/7494/659/285590/7040/7474/80856/10269/55512/10424/2260/864/2254/861/4856/79718/3398/84649/7483/4094/353500/4088/538/23111/1432/5781/5970/5916/3200/359845	ITGB8/HAND2/GREM1/EDN1/WT1/BMP6/SNAI1/CSF1/CD44/TIMP1/CHST11/TRPS1/HYAL3/CHSY1/PPARD/CFLAR/TGFBR1/NOTCH1/ARID5B/BPNT2/ZEB1/BMP2/POR/XBP1/BMPR2/SH3PXD2B/TGFB1/WNT5A/LNPK/ZMPSTE24/SMPD3/PGRMC2/FGFR1/RUNX3/FGF9/NA/CCN3/TBL1XR1/ID2/DGAT2/WNT9A/MAF/BMP8A/SMAD3/ATP7A/SPART/MAPK14/PTPN11/RELA/RARG/HOXA3/RFLNB
GO_REGULATION_OF_INNATE_IMMUNE_RESPONSE	GO_REGULATION_OF_INNATE_IMMUNE_RESPONSE	269	0.509207	1.49691	0.00242491	0.0282187	0.0222127	2743	tags=28%, list=18%, signal=24%	2069/5272/11274/8651/4790/84868/6714/330/329/5359/79132/6772/7128/3665/115362/4582/10906/10892/3659/3460/83666/101/3458/9111/1398/5770/3428/103/5716/23118/2358/9021/257397/5971/5063/5468/3105/85363/7474/8772/4068/10125/3093/5469/3902/23291/9491/115004/23705/5695/54625/5704/5713/94025/2547/2534/3845/55269/5689/11140/4067/3133/2867/5781/5970/29110/5684/5718/4893/5819/5711/10213/5690/3805/3916/331	EREG/SERPINB9/USP18/SOCS1/NFKB1/HAVCR2/SRC/BIRC3/BIRC2/PLSCR1/DHX58/STAT1/TNFAIP3/IRF7/GBP5/MUC1/TRAFD1/MALT1/IRF1/IFNGR2/PARP9/ADAM8/IFNG/NMI/CRK/PTPN1/IFI16/ADAR/PSMD10/TAB2/FPR2/SOCS3/TAB3/RELB/PAK3/PPARG/HLA-A/TRIM5/WNT5A/FADD/SH2D1A/RASGRP1/UBE2K/MED1/LAG3/FBXW11/PSMF1/CGAS/CADM1/PSMB7/PARP14/PSMC4/PSMD7/MUC16/XRCC6/FYN/KRAS/PSPC1/PSMB1/CDC37/LYN/HLA-E/FFAR2/PTPN11/RELA/TBK1/PSMA3/PSMD12/NRA…
GO_REGULATION_OF_EXTRINSIC_APOPTOTIC_SIGNALING_PATHWAY_VIA_DEATH_DOMAIN_RECEPTORS	GO_REGULATION_OF_EXTRINSIC_APOPTOTIC_SIGNALING_PATHWAY_VIA_DEATH_DOMAIN_RECEPTORS	52	0.69492	1.73651	0.00242858	0.0282187	0.0222127	1608	tags=31%, list=10%, signal=28%	356/3383/7057/355/6498/7128/8743/7227/117584/8837/64114/8682/8772/7186/8795/3958	FASLG/ICAM1/THBS1/FAS/SKIL/TNFAIP3/TNFSF10/TRPS1/RFFL/CFLAR/TMBIM1/PEA15/FADD/TRAF2/TNFRSF10B/LGALS3
GO_CHEMOKINE_BIOSYNTHETIC_PROCESS	GO_CHEMOKINE_BIOSYNTHETIC_PROCESS	14	0.865471	1.75734	0.00244552	0.0283449	0.0223121	686	tags=43%, list=4%, signal=41%	3553/1991/7124/7098/148022/3458	IL1B/ELANE/TNF/TLR3/TICAM1/IFNG
GO_FEMALE_SEX_DIFFERENTIATION	GO_FEMALE_SEX_DIFFERENTIATION	85	0.628279	1.67278	0.00245573	0.0283928	0.0223498	1313	tags=20%, list=9%, signal=18%	2069/4327/7490/3383/4323/6714/7422/56729/5806/558/8372/836/84159/3955/3625/5798/7474	EREG/MMP19/WT1/ICAM1/MMP14/SRC/VEGFA/RETN/PTX3/AXL/HYAL3/CASP3/ARID5B/LFNG/INHBB/PTPRN/WNT5A
GO_PHAGOCYTOSIS	GO_PHAGOCYTOSIS	240	0.517531	1.51148	0.00248562	0.0286675	0.0225661	1496	tags=18%, list=10%, signal=16%	3553/718/5031/6347/1991/7057/1053/7124/3601/6714/5291/8877/3685/5806/5657/558/2624/3458/56990/7525/9711/23603/1398/5868/2358/2889/6845/3688/5906/25/3949/4615/575/25912/3560/5468/8394/27102/64005/7879/5873/5795	IL1B/C3/P2RY6/CCL2/ELANE/THBS1/CEBPE/TNF/IL15RA/SRC/PIK3CB/SPHK1/ITGAV/PTX3/PRTN3/AXL/GATA2/IFNG/CDC42SE2/YES1/RUBCN/CORO1C/CRK/RAB5A/FPR2/RAPGEF1/VAMP7/ITGB1/RAP1A/ABL1/LDLR/MYD88/ADGRB1/C1orf43/IL2RB/PPARG/PIP5K1A/EIF2AK1/MYO1G/RAB7A/RAB27A/PTPRJ
GO_LEUKOCYTE_ACTIVATION_INVOLVED_IN_INFLAMMATORY_RESPONSE	GO_LEUKOCYTE_ACTIVATION_INVOLVED_IN_INFLAMMATORY_RESPONSE	39	0.731974	1.75352	0.00250493	0.028819	0.0226853	1108	tags=23%, list=7%, signal=21%	6348/8530/7124/7098/8877/10135/3458/2358/3949	CCL3/CST7/TNF/TLR3/SPHK1/NAMPT/IFNG/FPR2/LDLR
GO_PEPTIDYL_GLUTAMIC_ACID_MODIFICATION	GO_PEPTIDYL_GLUTAMIC_ACID_MODIFICATION	22	-0.698105	-1.83804	0.0025127	0.0288375	0.0226998	1994	tags=41%, list=13%, signal=36%	79739/29105/8260/23093/95681/142/340351/25809/79841	TTLL7/CFAP20/NAA10/TTLL5/CEP41/PARP1/AGBL3/TTLL1/AGBL2
GO_REGULATION_OF_TRANS_SYNAPTIC_SIGNALING	GO_REGULATION_OF_TRANS_SYNAPTIC_SIGNALING	337	0.490653	1.45854	0.0025328	0.0289902	0.0228201	1938	tags=21%, list=13%, signal=19%	3553/5743/23657/3269/6347/6547/3908/1906/55638/5552/23413/7124/10815/9456/6860/4355/57406/6714/10814/56729/136/4914/26037/773/5641/10211/54583/6774/55784/8775/2043/760/5868/11178/6780/3688/10769/5906/7532/54476/25/127262/43/4923/575/6616/4763/9693/11252/5908/5663/8878/6853/84896/4885/4130/6455/135/816/9495/8564/22930/5913/6812/79772/54413/10458/1861/114781/51201	IL1B/PTGS2/SLC7A11/HRH1/CCL2/SLC8A3/LAMA2/EDN1/SYBU/SRGN/NCS1/TNF/CPLX1/HOMER1/SYT4/MPP2/ABHD6/SRC/CPLX2/RETN/ADORA2B/NTRK1/SIPA1L1/CACNA1A/LGMN/FLOT1/EGLN1/STAT3/MCTP2/NAPA/EPHA4/CA2/RAB5A/LZTS1/STAU1/ITGB1/PLK2/RAP1A/YWHAG/RNF216/ABL1/TPRG1L/ACHE/NTSR1/ADGRB1/SNAP25/NF1/RAPGEF2/PACSIN2/RAP1B/PSEN1/SQSTM1/SYN1/ATAD1/NPTX2/MAP1A/SH3GL1/ADORA2A/CAMK2B/AKAP5/KMO/RAB3GAP1/RAPSN/STXBP1/MCTP1/NLGN3/BA…
GO_LIPID_STORAGE	GO_LIPID_STORAGE	68	0.656026	1.69903	0.00253843	0.0289902	0.0228201	1386	tags=24%, list=9%, signal=21%	3553/29923/718/4790/7124/10938/3685/80149/5467/114882/6721/4792/134429/5468/123/53349	IL1B/HILPDA/C3/NFKB1/TNF/EHD1/ITGAV/ZC3H12A/PPARD/OSBPL8/SREBF2/NFKBIA/STARD4/PPARG/PLIN2/ZFYVE1
GO_REGULATION_OF_GLIAL_CELL_MIGRATION	GO_REGULATION_OF_GLIAL_CELL_MIGRATION	16	0.849078	1.76396	0.00255123	0.0290653	0.0228792	393	tags=19%, list=3%, signal=18%	6348/1435/1880	CCL3/CSF1/GPR183
GO_REGULATION_OF_TRANSMEMBRANE_TRANSPORT	GO_REGULATION_OF_TRANSMEMBRANE_TRANSPORT	400	0.476392	1.42448	0.0025672	0.0291761	0.0229664	1690	tags=18%, list=11%, signal=16%	3553/6506/718/255057/5031/4283/8013/2669/6347/1906/7057/285966/5142/7124/3759/23415/9456/4780/151176/3099/1193/57761/486/6513/26251/57214/9943/8787/8645/773/9446/5144/51582/79602/3458/7525/114882/6536/124935/760/10105/2040/10580/8682/55829/3688/5906/25/4923/4734/23327/5243/5584/5663/55151/610/54997/6324/283518/10269/1192/7114/57817/51422/9948/25932/967/81/113451/388581	IL1B/SLC1A2/C3/CBARP/P2RY6/CXCL9/NR4A3/GEM/CCL2/EDN1/THBS1/TCAF2/PDE4B/TNF/KCNJ2/KCNH4/HOMER1/NFE2L2/ERFE/HK2/CLIC2/TRIB3/FXYD2/SLC2A1/KCNG2/CEMIP/OXSR1/RGS9/KCNK5/CACNA1A/GSTO1/PDE4D/AZIN1/ADIPOR2/IFNG/YES1/OSBPL8/SLC6A9/SLC43A2/CA2/PPIF/STOM/SORBS1/PEA15/SELENOS/ITGB1/RAP1A/ABL1/NTSR1/NEDD4/NEDD4L/ABCB1/PRKCI/PSEN1/TMEM38B/HCN2/TESC/SCN1B/KCNRG/ZMPSTE24/CLIC1/TMSB4X/HAMP/PRKAG2/WDR1/CLIC4/CD63/…
GO_POSITIVE_REGULATION_OF_CELL_DIVISION	GO_POSITIVE_REGULATION_OF_CELL_DIVISION	58	0.67763	1.71895	0.00264488	0.029986	0.0236039	1821	tags=28%, list=12%, signal=24%	3552/3553/2069/346389/7422/6795/7042/9371/7040/5586/56034/6840/5008/5154/2254/6886	IL1A/IL1B/EREG/MACC1/VEGFA/AURKC/TGFB2/KIF3B/TGFB1/PKN2/PDGFC/SVIL/OSM/PDGFA/FGF9/TAL1
GO_METANEPHRIC_NEPHRON_MORPHOGENESIS	GO_METANEPHRIC_NEPHRON_MORPHOGENESIS	17	0.838577	1.75972	0.00265752	0.0300501	0.0236543	463	tags=24%, list=3%, signal=23%	26585/7490/6772/3976	GREM1/WT1/STAT1/LIF
GO_REGULATION_OF_FATTY_ACID_METABOLIC_PROCESS	GO_REGULATION_OF_FATTY_ACID_METABOLIC_PROCESS	72	0.646625	1.68643	0.00266677	0.0300501	0.0236543	644	tags=14%, list=4%, signal=13%	3553/5743/8013/151176/3638/57761/51141/551/5467/79602	IL1B/PTGS2/NR4A3/ERFE/INSIG1/TRIB3/INSIG2/AVP/PPARD/ADIPOR2
GO_SPINAL_CORD_PATTERNING	GO_SPINAL_CORD_PATTERNING	10	0.898771	1.72992	0.00266983	0.0300501	0.0236543	1	tags=10%, list=0%, signal=10%	84504	NKX6-2
GO_MUCOPOLYSACCHARIDE_METABOLIC_PROCESS	GO_MUCOPOLYSACCHARIDE_METABOLIC_PROCESS	92	0.615996	1.65632	0.00270024	0.0303192	0.0238662	1377	tags=22%, list=9%, signal=20%	3553/29940/4790/3036/9334/960/9435/57214/56548/50515/8372/22856/6483/6482/54928/6484/10678/7040/1213/1464	IL1B/DSE/NFKB1/HAS1/B4GALT5/CD44/CHST2/CEMIP/CHST7/CHST11/HYAL3/CHSY1/ST3GAL2/ST3GAL1/BPNT2/ST3GAL4/B3GNT2/TGFB1/CLTC/CSPG4
GO_EXTRINSIC_APOPTOTIC_SIGNALING_PATHWAY_VIA_DEATH_DOMAIN_RECEPTORS	GO_EXTRINSIC_APOPTOTIC_SIGNALING_PATHWAY_VIA_DEATH_DOMAIN_RECEPTORS	79	0.635126	1.67592	0.00271236	0.0303824	0.0239159	1992	tags=28%, list=13%, signal=24%	356/3383/7057/7124/355/6498/7128/8743/637/7227/117584/8837/64114/8682/4763/8772/7186/8795/3958/5295/8737/8738	FASLG/ICAM1/THBS1/TNF/FAS/SKIL/TNFAIP3/TNFSF10/BID/TRPS1/RFFL/CFLAR/TMBIM1/PEA15/NF1/FADD/TRAF2/TNFRSF10B/LGALS3/PIK3R1/RIPK1/CRADD
GO_POSITIVE_REGULATION_OF_MESONEPHROS_DEVELOPMENT	GO_POSITIVE_REGULATION_OF_MESONEPHROS_DEVELOPMENT	13	0.869331	1.74335	0.00272883	0.0304897	0.0240004	395	tags=31%, list=3%, signal=30%	26585/7490/10409/7422	GREM1/WT1/BASP1/VEGFA
GO_P38MAPK_CASCADE	GO_P38MAPK_CASCADE	40	0.725957	1.74488	0.002735	0.0304897	0.0240004	563	tags=12%, list=4%, signal=12%	3553/9464/8877/7422/80149	IL1B/HAND2/SPHK1/VEGFA/ZC3H12A
GO_REGULATION_OF_SMALL_MOLECULE_METABOLIC_PROCESS	GO_REGULATION_OF_SMALL_MOLECULE_METABOLIC_PROCESS	372	0.481458	1.43638	0.00274248	0.0305003	0.0240088	1908	tags=19%, list=12%, signal=17%	3553/5743/23657/5031/8013/3269/654/79660/205/6615/4790/1717/7124/5209/151176/3638/6714/23541/648791/57761/136/51141/11182/54541/6309/551/5223/51582/5467/79602/3458/6774/9818/6721/5716/10580/3157/650/3487/5163/83667/55829/5447/3949/4923/157506/7040/134429/1213/5468/2023/5663/114897/4928/5571/10269/7114/55512/4779/51422/388581/5500/9491/5341/2170/7421/341/5695/5704/5713/6521/84649	IL1B/PTGS2/SLC7A11/P2RY6/NR4A3/HRH1/BMP6/PPP1R3B/AK4/SNAI1/NFKB1/DHCR7/TNF/PFKFB3/ERFE/INSIG1/SRC/SEC14L2/PPP1R3G/TRIB3/ADORA2B/INSIG2/SLC2A6/DDIT4/SC5D/AVP/PGAM1/AZIN1/PPARD/ADIPOR2/IFNG/STAT3/NUP58/SREBF2/PSMD10/SORBS1/HMGCS1/BMP2/IGFBP4/PDK1/SESN2/SELENOS/POR/LDLR/NTSR1/RDH10/TGFB1/STARD4/CLTC/PPARG/ENO1/PSEN1/C1QTNF1/NUP98/PRKAG1/ZMPSTE24/TMSB4X/SMPD3/NFE2L1/PRKAG2/C1QTNF12/PPP1CB/PSMF1/PLEK/…
GO_CELLULAR_RESPONSE_TO_TOXIC_SUBSTANCE	GO_CELLULAR_RESPONSE_TO_TOXIC_SUBSTANCE	93	0.61378	1.65201	0.00275746	0.0305941	0.0240826	1264	tags=19%, list=8%, signal=18%	5743/8288/6648/7124/241/4780/1193/2643/140809/9446/25841/25824/83667/55829/119391/10516/7296/2882	PTGS2/EPX/SOD2/TNF/ALOX5AP/NFE2L2/CLIC2/GCH1/SRXN1/GSTO1/ABTB2/PRDX5/SESN2/SELENOS/GSTO2/FBLN5/TXNRD1/GPX7
GO_RESPONSE_TO_INTERFERON_BETA	GO_RESPONSE_TO_INTERFERON_BETA	27	0.777226	1.75947	0.00276805	0.0306388	0.0241178	1784	tags=41%, list=12%, signal=36%	7098/5359/6772/87178/3659/55337/3428/3093/997/54739/8519	TLR3/PLSCR1/STAT1/PNPT1/IRF1/SHFL/IFI16/UBE2K/CDC34/XAF1/IFITM1
GO_T_CELL_DIFFERENTIATION_INVOLVED_IN_IMMUNE_RESPONSE	GO_T_CELL_DIFFERENTIATION_INVOLVED_IN_IMMUNE_RESPONSE	61	0.668481	1.70861	0.00280112	0.030817	0.0242581	2480	tags=36%, list=16%, signal=30%	51561/114548/941/10538/1880/80149/10892/3458/6774/64332/5971/54542/161882/246778/602/3566/6095/3718/7292/538/301/5734	IL23A/NLRP3/CD80/BATF/GPR183/ZC3H12A/MALT1/IFNG/STAT3/NFKBIZ/RELB/RC3H2/ZFPM1/IL27/BCL3/IL4R/RORA/JAK3/TNFSF4/ATP7A/ANXA1/PTGER4
GO_TRANSFORMING_GROWTH_FACTOR_BETA_PRODUCTION	GO_TRANSFORMING_GROWTH_FACTOR_BETA_PRODUCTION	32	0.755199	1.75471	0.00280227	0.030817	0.0242581	1011	tags=19%, list=7%, signal=18%	3696/5743/7057/3685/5045/7042	ITGB8/PTGS2/THBS1/ITGAV/FURIN/TGFB2
GO_REGULATION_OF_CELL_FATE_COMMITMENT	GO_REGULATION_OF_CELL_FATE_COMMITMENT	16	0.847474	1.76063	0.00281123	0.030817	0.0242581	143	tags=12%, list=1%, signal=12%	84504/51561	NKX6-2/IL23A
GO_POSITIVE_REGULATION_OF_NERVOUS_SYSTEM_DEVELOPMENT	GO_POSITIVE_REGULATION_OF_NERVOUS_SYSTEM_DEVELOPMENT	421	0.471469	1.41178	0.00281673	0.030817	0.0242581	1331	tags=14%, list=9%, signal=14%	84504/3553/6348/23566/400746/8530/654/1435/9638/7124/5979/4780/6860/151/7133/375790/7422/6498/440730/3976/4914/4681/2624/27/8482/9839/60436/9175/3458/8837/23011/1809/4851/2803/2043/8650/2889/8578/6935/650/4049/6845/5906/659/54149/575/5063/10371/9693/23327/7040/91752/9043/5468/5584/81545/5663/11075/7474/147040/81565	NKX6-2/IL1B/CCL3/LPAR3/NCMAP/CST7/BMP6/CSF1/NA/TNF/RET/NFE2L2/SYT4/ADRA2B/TNFRSF1B/AGRN/VEGFA/SKIL/TRIM67/LIF/NTRK1/GATA2/ABL2/SEMA7A/ZEB2/TGIF2/MAP3K13/IFNG/CFLAR/RAB21/DPYSL3/NOTCH1/GOLGA4/EPHA4/NUMB/RAPGEF1/SCARF1/ZEB1/BMP2/LTA/VAMP7/RAP1A/BMPR2/C21orf91/ADGRB1/PAK3/SEMA3A/RAPGEF2/NEDD4L/TGFB1/ZNF804A/SPAG9/PPARG/PRKCI/FBXO38/PSEN1/STMN2/WNT5A/KCTD11/NDEL1
GO_CELLULAR_RESPONSE_TO_PEPTIDE_HORMONE_STIMULUS	GO_CELLULAR_RESPONSE_TO_PEPTIDE_HORMONE_STIMULUS	267	0.507519	1.49116	0.00281723	0.030817	0.0242581	1913	tags=23%, list=12%, signal=21%	3553/2706/8013/1906/7471/8651/4790/8412/4780/151176/3638/6714/57761/6772/51141/490/245973/5872/8837/6774/1398/9663/5770/114882/529/2729/760/10580/2805/9021/55829/5447/7494/94056/7532/6517/3625/5905/1176/324/5468/5584/5908/81565/51606/6776/9296/51762/55667/23189/23175/5315/388581/5747/523/5295/3416/55532/10458/528/5286/11031	IL1B/GJB2/NR4A3/EDN1/WNT1/SOCS1/NFKB1/NA/NFE2L2/ERFE/INSIG1/SRC/TRIB3/STAT1/INSIG2/ATP2B1/ATP6V1C2/RAB13/CFLAR/STAT3/CRK/LPIN2/PTPN1/OSBPL8/ATP6V1E1/GCLC/CA2/SORBS1/GOT1/SOCS3/SELENOS/POR/XBP1/SYAP1/YWHAG/SLC2A4/INHBB/RANGAP1/AP3S1/APC/PPARG/PRKCI/RAP1B/NDEL1/ATP6V1H/STAT5A/ATP6V1F/RAB8B/DENND4C/KANK1/LPIN1/PKM/C1QTNF12/PTK2/ATP6V1A/PIK3R1/IDE/SLC30A10/BAIAP2/ATP6V1C1/PIK3C2A/RAB31
GO_REGULATION_OF_ANIMAL_ORGAN_MORPHOGENESIS	GO_REGULATION_OF_ANIMAL_ORGAN_MORPHOGENESIS	186	0.539189	1.54827	0.00282374	0.030817	0.0242581	1910	tags=24%, list=12%, signal=21%	9464/26585/1906/7490/7471/1435/7124/10409/7422/80326/6772/7128/3976/4300/8323/8837/7046/4851/5716/10512/85407/650/7042/5447/7855/7494/659/25/1213/7474/80320/54880/5469/5154/9491/2260/3516/10370/7421/4070/5695/5704/5713/55727	HAND2/GREM1/EDN1/WT1/WNT1/CSF1/TNF/BASP1/VEGFA/WNT10A/STAT1/TNFAIP3/LIF/MLLT3/FZD6/CFLAR/TGFBR1/NOTCH1/PSMD10/SEMA3C/NKD1/BMP2/TGFB2/POR/FZD5/XBP1/BMPR2/ABL1/CLTC/WNT5A/SP6/BCOR/MED1/PDGFA/PSMF1/FGFR1/RBPJ/CITED2/VDR/TACSTD2/PSMB7/PSMC4/PSMD7/BTBD7
GO_T_CELL_CYTOKINE_PRODUCTION	GO_T_CELL_CYTOKINE_PRODUCTION	37	0.735637	1.74721	0.00283073	0.0308213	0.0242614	1379	tags=27%, list=9%, signal=25%	3553/3554/114548/7133/10892/1604/163486/7855/3105/7186	IL1B/IL1R1/NLRP3/TNFRSF1B/MALT1/CD55/DENND1B/FZD5/HLA-A/TRAF2
GO_AMINE_TRANSPORT	GO_AMINE_TRANSPORT	51	0.692309	1.72487	0.00284014	0.0308519	0.0242855	1898	tags=27%, list=12%, signal=24%	51458/366/6860/151/551/124935/3688/4923/5663/135/8564/22930/6812/1861	RHCG/AQP9/SYT4/ADRA2B/AVP/SLC43A2/ITGB1/NTSR1/PSEN1/ADORA2A/KMO/RAB3GAP1/STXBP1/TOR1A
GO_POSITIVE_REGULATION_OF_SIGNALING_RECEPTOR_ACTIVITY	GO_POSITIVE_REGULATION_OF_SIGNALING_RECEPTOR_ACTIVITY	32	0.754317	1.75266	0.00287524	0.0311607	0.0245286	1821	tags=34%, list=12%, signal=30%	26585/2069/6347/151/8787/3458/3688/5469/6868/54413/6886	GREM1/EREG/CCL2/ADRA2B/RGS9/IFNG/ITGB1/MED1/ADAM17/NLGN3/TAL1
GO_CELLULAR_RESPONSE_TO_INTERFERON_ALPHA	GO_CELLULAR_RESPONSE_TO_INTERFERON_ALPHA	11	0.888841	1.73668	0.00289535	0.031306	0.024643	560	tags=27%, list=4%, signal=26%	3433/3437/558	IFIT2/IFIT3/AXL
GO_REGULATION_OF_FEEDING_BEHAVIOR	GO_REGULATION_OF_FEEDING_BEHAVIOR	16	0.845824	1.75721	0.00290872	0.031378	0.0246996	742	tags=25%, list=5%, signal=24%	8013/84251/56729/6774	NR4A3/SGIP1/RETN/STAT3
GO_POSITIVE_REGULATION_OF_VASCULAR_ASSOCIATED_SMOOTH_MUSCLE_CELL_PROLIFERATION	GO_POSITIVE_REGULATION_OF_VASCULAR_ASSOCIATED_SMOOTH_MUSCLE_CELL_PROLIFERATION	31	0.756834	1.7501	0.00293363	0.0315737	0.0248536	294	tags=16%, list=2%, signal=16%	5031/8013/1906/7124/3586	P2RY6/NR4A3/EDN1/TNF/IL10
GO_SEX_DIFFERENTIATION	GO_SEX_DIFFERENTIATION	194	0.535633	1.54283	0.00294911	0.0316674	0.0249274	1383	tags=17%, list=9%, signal=16%	10046/2069/4327/7490/654/3383/4323/7098/10409/595/6714/7422/56729/5806/4914/8743/558/8372/5872/836/7046/84159/3955/3157/7042/157506/3625/10371/22862/5798/92/7474/3205	MAMLD1/EREG/MMP19/WT1/BMP6/ICAM1/MMP14/TLR3/BASP1/CCND1/SRC/VEGFA/RETN/PTX3/NTRK1/TNFSF10/AXL/HYAL3/RAB13/CASP3/TGFBR1/ARID5B/LFNG/HMGCS1/TGFB2/RDH10/INHBB/SEMA3A/FNDC3A/PTPRN/ACVR2A/WNT5A/HOXA9
GO_NEGATIVE_REGULATION_OF_MUSCLE_CONTRACTION	GO_NEGATIVE_REGULATION_OF_MUSCLE_CONTRACTION	20	0.815954	1.76006	0.00296671	0.0317354	0.024981	563	tags=25%, list=4%, signal=24%	5743/10203/9732/136/80149	PTGS2/CALCRL/DOCK4/ADORA2B/ZC3H12A
GO_OSSIFICATION	GO_OSSIFICATION	313	0.494177	1.46409	0.00297446	0.0317354	0.024981	1809	tags=18%, list=12%, signal=16%	5743/9464/6348/26585/9636/654/6615/1435/5552/7124/4323/6497/22904/490/1836/57003/22856/8482/6320/4664/4851/57045/9562/54928/103/650/7042/3183/659/43/6238/285590/4763/7040/1213/92/55151/7474/249/54880/169200/6696/10269/1192/55512/29887/9260/23601/83999/864/5747/3516/56172/3376/8519/2254/861	PTGS2/HAND2/CCL3/GREM1/ISG15/BMP6/SNAI1/CSF1/SRGN/TNF/MMP14/SKI/SBNO2/ATP2B1/SLC26A2/CCDC47/CHSY1/SEMA7A/CLEC11A/NAB1/NOTCH1/TWSG1/MINPP1/BPNT2/ADAR/BMP2/TGFB2/HNRNPC/BMPR2/ACHE/RRBP1/SH3PXD2B/NF1/TGFB1/CLTC/ACVR2A/TMEM38B/WNT5A/ALPL/BCOR/TMEM64/SPP1/ZMPSTE24/CLIC1/SMPD3/SNX10/PDLIM7/CLEC5A/KREMEN1/RUNX3/PTK2/RBPJ/ANKH/IARS1/IFITM1/FGF9/NA
GO_NEGATIVE_REGULATION_OF_WOUND_HEALING	GO_NEGATIVE_REGULATION_OF_WOUND_HEALING	55	0.680563	1.71422	0.00297583	0.0317354	0.024981	1336	tags=22%, list=9%, signal=20%	5055/1906/5329/7057/7124/7035/5328/84830/1398/135228/23332/114897	SERPINB2/EDN1/PLAUR/THBS1/TNF/TFPI/PLAU/ADTRP/CRK/CD109/CLASP1/C1QTNF1
GO_OSTEOCLAST_DIFFERENTIATION	GO_OSTEOCLAST_DIFFERENTIATION	80	0.630642	1.66673	0.00299312	0.0317781	0.0250146	1757	tags=28%, list=11%, signal=24%	6348/51561/1435/7124/7098/6714/22904/8111/1880/7037/3458/7107/760/9644/135228/4763/4853/169200/5048/29887/3658/5295	CCL3/IL23A/CSF1/TNF/TLR3/SRC/SBNO2/GPR68/GPR183/TFRC/IFNG/GPR137B/CA2/SH3PXD2A/CD109/NF1/NOTCH2/TMEM64/PAFAH1B1/SNX10/IREB2/PIK3R1
GO_NECROTIC_CELL_DEATH	GO_NECROTIC_CELL_DEATH	48	0.699202	1.72634	0.00299344	0.0317781	0.0250146	1379	tags=29%, list=9%, signal=27%	356/664/7124/7098/1687/330/329/355/148022/8837/10105/253430/8772/7186	FASLG/BNIP3/TNF/TLR3/GSDME/BIRC3/BIRC2/FAS/TICAM1/CFLAR/PPIF/IPMK/FADD/TRAF2
GO_INTERFERON_GAMMA_MEDIATED_SIGNALING_PATHWAY	GO_INTERFERON_GAMMA_MEDIATED_SIGNALING_PATHWAY	82	0.626603	1.66101	0.00301953	0.0319824	0.0251754	2362	tags=37%, list=15%, signal=31%	8638/3383/8651/6737/960/6772/3665/2634/5371/3659/3460/83666/3458/9111/4939/10379/7706/9021/5468/3105/85363/5469/816/54625/55128/4502/4940/11140/3117/3133	OASL/ICAM1/SOCS1/TRIM21/CD44/STAT1/IRF7/GBP2/PML/IRF1/IFNGR2/PARP9/IFNG/NMI/OAS2/IRF9/TRIM25/SOCS3/PPARG/HLA-A/TRIM5/MED1/CAMK2B/PARP14/TRIM68/MT2A/OAS3/CDC37/HLA-DQA1/HLA-E
GO_RECEPTOR_METABOLIC_PROCESS	GO_RECEPTOR_METABOLIC_PROCESS	161	0.552032	1.56821	0.00303125	0.0320339	0.0252159	1296	tags=24%, list=8%, signal=22%	3576/26585/10203/1906/7124/4599/3586/4600/151636/1889/7422/10802/57007/3685/10133/51510/5641/6386/10211/7037/3458/5045/125058/5770/30849/55681/3577/8650/8301/5868/3688/43/6616/4734/7040/4043/1213/5468/5663	CXCL8/GREM1/CALCRL/EDN1/TNF/MX1/IL10/MX2/DTX3L/ECE1/VEGFA/SEC24A/ACKR3/ITGAV/OPTN/CHMP5/LGMN/SDCBP/FLOT1/TFRC/IFNG/FURIN/TBC1D16/PTPN1/PIK3R4/SCYL2/CXCR1/NUMB/PICALM/RAB5A/ITGB1/ACHE/SNAP25/NEDD4/TGFB1/LRPAP1/CLTC/PPARG/PSEN1
GO_POSITIVE_REGULATION_OF_FATTY_ACID_BIOSYNTHETIC_PROCESS	GO_POSITIVE_REGULATION_OF_FATTY_ACID_BIOSYNTHETIC_PROCESS	13	0.866912	1.7385	0.00306573	0.0322534	0.0253887	583	tags=23%, list=4%, signal=22%	3553/5743/551	IL1B/PTGS2/AVP
GO_RESPONSE_TO_ANGIOTENSIN	GO_RESPONSE_TO_ANGIOTENSIN	22	0.802759	1.75854	0.00306587	0.0322534	0.0253887	867	tags=23%, list=6%, signal=21%	5743/4790/4780/6714/760	PTGS2/NFKB1/NFE2L2/SRC/CA2
GO_NON_MOTILE_CILIUM_ASSEMBLY	GO_NON_MOTILE_CILIUM_ASSEMBLY	51	-0.553192	-1.73643	0.00307273	0.0322534	0.0253887	2039	tags=35%, list=13%, signal=31%	84902/221322/79659/1639/4134/80199/11190/23322/57560/10801/57545/26160/283232/27185/57216/57562/9742/57096	CEP89/TBC1D32/DYNC2H1/DCTN1/MAP4/FUZ/CEP250/RPGRIP1L/IFT80/SEPTIN9/CC2D2A/IFT172/TMEM80/DISC1/VANGL2/CEP126/IFT140/RPGRIP1
GO_MESONEPHROS_DEVELOPMENT	GO_MESONEPHROS_DEVELOPMENT	64	0.659144	1.69418	0.00309257	0.0323782	0.025487	395	tags=12%, list=3%, signal=12%	26585/384/7490/7471/5979/10409/6385/7422	GREM1/ARG2/WT1/WNT1/RET/BASP1/SDC4/VEGFA
GO_NEGATIVE_REGULATION_OF_LEUKOCYTE_CELL_CELL_ADHESION	GO_NEGATIVE_REGULATION_OF_LEUKOCYTE_CELL_CELL_ADHESION	107	0.595726	1.62837	0.00310216	0.0323782	0.025487	1857	tags=24%, list=12%, signal=22%	3559/29126/384/941/8651/441478/3586/6385/84868/84830/80149/3659/836/57045/54900/54542/53833/64844/3902/135/3958/864/8379/861/65125/3566	IL2RA/CD274/ARG2/CD80/SOCS1/NRARP/IL10/SDC4/HAVCR2/ADTRP/ZC3H12A/IRF1/CASP3/TWSG1/LAX1/RC3H2/IL20RB/MARCHF7/LAG3/ADORA2A/LGALS3/RUNX3/MAD1L1/NA/WNK1/IL4R
GO_NEGATIVE_REGULATION_OF_OSSIFICATION	GO_NEGATIVE_REGULATION_OF_OSSIFICATION	58	0.672636	1.70628	0.00310543	0.0323782	0.025487	784	tags=16%, list=5%, signal=15%	9464/6348/26585/5552/7124/6497/22856/4851/57045	HAND2/CCL3/GREM1/SRGN/TNF/SKI/CHSY1/NOTCH1/TWSG1
GO_REGULATION_OF_PHAGOCYTOSIS	GO_REGULATION_OF_PHAGOCYTOSIS	79	0.630231	1.663	0.00312484	0.0325081	0.0255892	1496	tags=23%, list=10%, signal=21%	3553/718/6347/7124/3601/8877/3685/5806/5657/2624/3458/2358/2889/5906/3560/5468/5873/5795	IL1B/C3/CCL2/TNF/IL15RA/SPHK1/ITGAV/PTX3/PRTN3/GATA2/IFNG/FPR2/RAPGEF1/RAP1A/IL2RB/PPARG/RAB27A/PTPRJ
GO_REGULATION_OF_UNSATURATED_FATTY_ACID_BIOSYNTHETIC_PROCESS	GO_REGULATION_OF_UNSATURATED_FATTY_ACID_BIOSYNTHETIC_PROCESS	10	0.894925	1.72252	0.00315843	0.0326067	0.0256668	583	tags=30%, list=4%, signal=29%	3553/5743/551	IL1B/PTGS2/AVP
GO_ENTRY_INTO_HOST	GO_ENTRY_INTO_HOST	123	0.579931	1.60825	0.00316088	0.0326067	0.0256668	1854	tags=24%, list=12%, signal=21%	3576/7293/3383/1514/941/2838/6737/6714/3685/4864/5806/558/1500/1604/8372/7037/5034/7706/50848/3688/3949/85363/290/23601/3416/83737/8519/950/55128	CXCL8/TNFRSF4/ICAM1/CTSL/CD80/GPR15/TRIM21/SRC/ITGAV/NPC1/PTX3/AXL/CTNND1/CD55/HYAL3/TFRC/P4HB/TRIM25/F11R/ITGB1/LDLR/TRIM5/ANPEP/CLEC5A/IDE/ITCH/IFITM1/SCARB2/TRIM68
GO_NEGATIVE_REGULATION_OF_ENDOTHELIAL_CELL_PROLIFERATION	GO_NEGATIVE_REGULATION_OF_ENDOTHELIAL_CELL_PROLIFERATION	33	0.746319	1.74417	0.00316167	0.0326067	0.0256668	1253	tags=27%, list=8%, signal=25%	6347/2321/7057/7124/6772/22846/7046/4763/5468	CCL2/FLT1/THBS1/TNF/STAT1/VASH1/TGFBR1/NF1/PPARG
GO_NEGATIVE_REGULATION_OF_RESPONSE_TO_WOUNDING	GO_NEGATIVE_REGULATION_OF_RESPONSE_TO_WOUNDING	67	0.65332	1.68842	0.00316224	0.0326067	0.0256668	1802	tags=27%, list=12%, signal=24%	5055/1906/5329/7057/7124/7035/5328/84830/56963/1398/2043/135228/23332/114897/6696/5154/83999/5624	SERPINB2/EDN1/PLAUR/THBS1/TNF/TFPI/PLAU/ADTRP/RGMA/CRK/EPHA4/CD109/CLASP1/C1QTNF1/SPP1/PDGFA/KREMEN1/PROC
GO_TEMPERATURE_HOMEOSTASIS	GO_TEMPERATURE_HOMEOSTASIS	144	0.562771	1.5835	0.00318211	0.0327393	0.0257712	1233	tags=11%, list=8%, signal=10%	3552/3553/5743/7124/57406/7422/23135/79602/6774/4851/5564/43/4923/2180/9807/324	IL1A/IL1B/PTGS2/TNF/ABHD6/VEGFA/KDM6B/ADIPOR2/STAT3/NOTCH1/PRKAB1/ACHE/NTSR1/ACSL1/IP6K1/APC
GO_GLAND_DEVELOPMENT	GO_GLAND_DEVELOPMENT	328	0.488402	1.45033	0.00320008	0.0328518	0.0258598	1789	tags=18%, list=12%, signal=16%	9464/123872/3642/7490/7471/205/1435/7124/8854/3586/595/6714/3099/7422/80326/7128/87178/137964/5371/2624/8837/7046/4851/84159/8820/57045/4939/6729/10512/3157/650/7042/7494/5906/25/10371/4763/7040/4853/5663/7474/8772/3205/5469/394/6776/10269/7049/57817/6239/3720/5315/5324/5154/2260/3516/10370/8379/7421	HAND2/DNAAF1/INSM1/WT1/WNT1/AK4/CSF1/TNF/ALDH1A2/IL10/CCND1/SRC/HK2/VEGFA/WNT10A/TNFAIP3/PNPT1/GPAT4/PML/GATA2/CFLAR/TGFBR1/NOTCH1/ARID5B/HESX1/TWSG1/OAS2/SRP54/SEMA3C/HMGCS1/BMP2/TGFB2/XBP1/RAP1A/ABL1/SEMA3A/NF1/TGFB1/NOTCH2/PSEN1/WNT5A/FADD/HOXA9/MED1/ARHGAP5/STAT5A/ZMPSTE24/TGFBR3/HAMP/RREB1/JARID2/PKM/PLAG1/PDGFA/FGFR1/RBPJ/CITED2/MAD1L1/VDR
GO_NEGATIVE_REGULATION_OF_TUMOR_NECROSIS_FACTOR_SUPERFAMILY_CYTOKINE_PRODUCTION	GO_NEGATIVE_REGULATION_OF_TUMOR_NECROSIS_FACTOR_SUPERFAMILY_CYTOKINE_PRODUCTION	50	0.691839	1.71895	0.00321387	0.032921	0.0259142	1091	tags=22%, list=7%, signal=20%	29126/671/384/3586/84868/7128/558/80149/4157/55829/5004	CD274/BPI/ARG2/IL10/HAVCR2/TNFAIP3/AXL/ZC3H12A/MC1R/SELENOS/ORM1
GO_NEGATIVE_REGULATION_OF_INTRACELLULAR_SIGNAL_TRANSDUCTION	GO_NEGATIVE_REGULATION_OF_INTRACELLULAR_SIGNAL_TRANSDUCTION	447	0.465554	1.39637	0.00326555	0.033349	0.0262511	2874	tags=27%, list=19%, signal=23%	3553/5743/80824/6648/1846/5329/27330/114548/7057/6615/10318/4780/84174/6714/960/1193/79132/57761/6772/440730/7128/1844/57007/3976/54541/4582/637/10133/200734/56957/80149/9446/5144/10010/27/117584/154743/5770/2907/9516/10105/5716/2889/22821/7042/9686/83667/55829/3688/7126/7494/25/54900/7320/57053/7009/4763/80014/64844/2023/27250/5516/6880/5048/50484/11072/5795/5598/7114/23189/997/23291/1848/5341/5…	IL1B/PTGS2/DUSP16/SOD2/DUSP4/PLAUR/RPS6KA6/NLRP3/THBS1/SNAI1/TNIP1/NFE2L2/SLA2/SRC/CD44/CLIC2/DHX58/TRIB3/STAT1/TRIM67/TNFAIP3/DUSP2/ACKR3/LIF/DDIT4/MUC1/BID/OPTN/SPRED2/OTUD7B/ZC3H12A/GSTO1/PDE4D/TANK/ABL2/RFFL/BMT2/PTPN1/GRINA/LITAF/PPIF/PSMD10/RAPGEF1/RASA3/TGFB2/VGLL4/SESN2/SELENOS/ITGB1/TNFAIP1/XBP1/ABL1/LAX1/UBE2B/CHRNA10/TMBIM6/NF1/WWC2/MARCHF7/ENO1/PDCD4/PPP2CB/TAF9/PAFAH1B1/RRM2B/DUSP14/…
GO_POSITIVE_REGULATION_OF_GRANULOCYTE_CHEMOTAXIS	GO_POSITIVE_REGULATION_OF_GRANULOCYTE_CHEMOTAXIS	23	0.794625	1.75485	0.00326993	0.033349	0.0262511	272	tags=17%, list=2%, signal=17%	3576/51561/1906/1236	CXCL8/IL23A/EDN1/CCR7
GO_NEGATIVE_REGULATION_OF_SMOOTH_MUSCLE_CONTRACTION	GO_NEGATIVE_REGULATION_OF_SMOOTH_MUSCLE_CONTRACTION	12	0.874244	1.73117	0.0032897	0.0334775	0.0263523	450	tags=33%, list=3%, signal=32%	5743/10203/9732/136	PTGS2/CALCRL/DOCK4/ADORA2B
GO_NEGATIVE_REGULATION_OF_TRANSMEMBRANE_TRANSPORT	GO_NEGATIVE_REGULATION_OF_TRANSMEMBRANE_TRANSPORT	90	0.614783	1.64887	0.0033339	0.0338536	0.0266483	1201	tags=19%, list=8%, signal=18%	3553/255057/2669/7057/285966/7124/1193/9943/9446/6536/124935/10105/8682/55829/4923/4734/23327	IL1B/CBARP/GEM/THBS1/TCAF2/TNF/CLIC2/OXSR1/GSTO1/SLC6A9/SLC43A2/PPIF/PEA15/SELENOS/NTSR1/NEDD4/NEDD4L
GO_PHOSPHOLIPASE_C_ACTIVATING_G_PROTEIN_COUPLED_RECEPTOR_SIGNALING_PATHWAY	GO_PHOSPHOLIPASE_C_ACTIVATING_G_PROTEIN_COUPLED_RECEPTOR_SIGNALING_PATHWAY	53	0.682411	1.71019	0.00342077	0.0346603	0.0272833	558	tags=13%, list=4%, signal=13%	23566/80045/5031/3269/1906/9456/2769	LPAR3/GPR157/P2RY6/HRH1/EDN1/HOMER1/GNA15
GO_REGULATION_OF_LEUKOCYTE_APOPTOTIC_PROCESS	GO_REGULATION_OF_LEUKOCYTE_APOPTOTIC_PROCESS	75	0.634856	1.66489	0.0034798	0.0351821	0.0276941	1608	tags=23%, list=10%, signal=20%	29126/23657/8013/384/338442/1236/3586/5291/3665/558/101/55829/9693/7474/8772/5133/3958	CD274/SLC7A11/NR4A3/ARG2/HCAR2/CCR7/IL10/PIK3CB/IRF7/AXL/ADAM8/SELENOS/RAPGEF2/WNT5A/FADD/PDCD1/LGALS3
GO_NEGATIVE_REGULATION_BY_HOST_OF_VIRAL_PROCESS	GO_NEGATIVE_REGULATION_BY_HOST_OF_VIRAL_PROCESS	10	0.892713	1.71826	0.00350742	0.0353693	0.0278414	563	tags=30%, list=4%, signal=29%	6355/5806/80149	CCL8/PTX3/ZC3H12A
GO_POSITIVE_REGULATION_OF_PEPTIDYL_TYROSINE_PHOSPHORYLATION	GO_POSITIVE_REGULATION_OF_PEPTIDYL_TYROSINE_PHOSPHORYLATION	145	0.559945	1.5767	0.00352868	0.0353693	0.0278414	1853	tags=22%, list=12%, signal=20%	3589/26585/2069/51561/654/3383/941/7124/6714/960/7422/8784/1636/3976/83666/3458/7525/6774/5770/2043/30844/9021/25/7040/1464/5795/5168/5008/6868/6886/54625/57091	IL11/GREM1/EREG/IL23A/BMP6/ICAM1/CD80/TNF/SRC/CD44/VEGFA/TNFRSF18/ACE/LIF/PARP9/IFNG/YES1/STAT3/PTPN1/EPHA4/EHD4/SOCS3/ABL1/TGFB1/CSPG4/PTPRJ/ENPP2/OSM/ADAM17/TAL1/PARP14/CASS4
GO_COAGULATION	GO_COAGULATION	271	0.502296	1.47698	0.00354049	0.0353693	0.0278414	1975	tags=20%, list=13%, signal=17%	5055/2152/7980/23657/1906/5329/7057/4780/7035/5328/10938/151/6714/5291/5359/84830/9060/5657/8323/2769/558/2624/3659/54331/2768/5868/308/50848/3998/8546/23533/3937/5663/11234/114897/80856/5873/1192/2151/161882/135/5154/5341/5295/50808/5624/6812/6814/2157/6521/5025/2782/23764	SERPINB2/F3/TFPI2/SLC7A11/EDN1/PLAUR/THBS1/NFE2L2/TFPI/PLAU/EHD1/ADRA2B/SRC/PIK3CB/PLSCR1/ADTRP/PAPSS2/PRTN3/FZD6/GNA15/AXL/GATA2/IRF1/GNG2/GNA12/RAB5A/ANXA5/F11R/LMAN1/AP3B1/PIK3R5/LCP2/PSEN1/HPS5/C1QTNF1/LNPK/RAB27A/CLIC1/F2RL2/ZFPM1/ADORA2A/PDGFA/PLEK/PIK3R1/AK3/PROC/STXBP1/STXBP3/F8/SLC4A1/P2RX4/GNB1/MAFF
GO_NEGATIVE_REGULATION_OF_GLIAL_CELL_DIFFERENTIATION	GO_NEGATIVE_REGULATION_OF_GLIAL_CELL_DIFFERENTIATION	16	0.839543	1.74416	0.00354247	0.0353693	0.0278414	1195	tags=25%, list=8%, signal=23%	84504/4851/3949/4763	NKX6-2/NOTCH1/LDLR/NF1
GO_CELL_ADHESION_MEDIATED_BY_INTEGRIN	GO_CELL_ADHESION_MEDIATED_BY_INTEGRIN	60	0.66543	1.69684	0.00354248	0.0353693	0.0278414	1838	tags=28%, list=12%, signal=25%	3696/3383/5979/5328/3685/3976/4582/9404/1398/7042/3688/54997/80173/5747/6868/4856/65125	ITGB8/ICAM1/RET/PLAU/ITGAV/LIF/MUC1/LPXN/CRK/TGFB2/ITGB1/TESC/IFT74/PTK2/ADAM17/CCN3/WNK1
GO_FATTY_ACID_BIOSYNTHETIC_PROCESS	GO_FATTY_ACID_BIOSYNTHETIC_PROCESS	121	0.579084	1.60305	0.00354374	0.0353693	0.0278414	1078	tags=14%, list=7%, signal=13%	3553/5743/1906/79993/241/3638/57761/51141/551/8560/79602/11343/11057/5564/54995/9444/7494	IL1B/PTGS2/EDN1/ELOVL7/ALOX5AP/INSIG1/TRIB3/INSIG2/AVP/DEGS1/ADIPOR2/MGLL/ABHD2/PRKAB1/OXSM/QKI/XBP1
GO_DEVELOPMENT_OF_PRIMARY_FEMALE_SEXUAL_CHARACTERISTICS	GO_DEVELOPMENT_OF_PRIMARY_FEMALE_SEXUAL_CHARACTERISTICS	76	0.632338	1.66089	0.00357332	0.0355884	0.0280139	1251	tags=20%, list=8%, signal=18%	2069/4327/7490/3383/4323/6714/7422/56729/5806/8372/836/84159/3955/3625/5798	EREG/MMP19/WT1/ICAM1/MMP14/SRC/VEGFA/RETN/PTX3/HYAL3/CASP3/ARID5B/LFNG/INHBB/PTPRN
GO_PATTERN_RECOGNITION_RECEPTOR_SIGNALING_PATHWAY	GO_PATTERN_RECOGNITION_RECEPTOR_SIGNALING_PATHWAY	171	0.543128	1.54987	0.00358578	0.0356366	0.0280518	3155	tags=36%, list=21%, signal=29%	3656/1514/64135/7098/10318/84868/23586/330/329/79132/7128/3665/23180/79155/148022/10010/3659/5641/7187/10211/30849/118788/23118/257397/4792/7184/4615/8772/3654/6197/6279/83737/8737/7097/9867/5289/4067/2867/5970/29110/9258/26057/2150/64127/9958/6280/1508/1540/55666/331/4795/51284/57162/57142/23369/7322/26191/7321/55914/8517/8767	IRAK2/CTSL/IFIH1/TLR3/TNIP1/HAVCR2/DDX58/BIRC3/BIRC2/DHX58/TNFAIP3/IRF7/RFTN1/TNIP2/TICAM1/TANK/IRF1/LGMN/TRAF3/FLOT1/PIK3R4/PIK3AP1/TAB2/TAB3/NFKBIA/HSP90B1/MYD88/FADD/IRAK1/RPS6KA3/S100A8/ITCH/RIPK1/TLR2/PJA2/PIK3C3/LYN/FFAR2/RELA/TBK1/MFHAS1/ANKRD17/F2RL1/NOD2/USP15/S100A9/CTSB/CYLD/NPLOC4/XIAP/NFKBIL1/TLR7/PELI1/RTN4/PUM2/UBE2D2/PTPN22/UBE2D1/ERBIN/IKBKG/RIPK2
GO_TOLL_LIKE_RECEPTOR_SIGNALING_PATHWAY	GO_TOLL_LIKE_RECEPTOR_SIGNALING_PATHWAY	126	0.573939	1.59521	0.00363729	0.0360717	0.0283944	1425	tags=21%, list=9%, signal=20%	3656/1514/7098/10318/84868/330/329/7128/3665/23180/79155/148022/10010/3659/5641/7187/10211/30849/118788/23118/257397/4792/7184/4615/8772/3654/6197	IRAK2/CTSL/TLR3/TNIP1/HAVCR2/BIRC3/BIRC2/TNFAIP3/IRF7/RFTN1/TNIP2/TICAM1/TANK/IRF1/LGMN/TRAF3/FLOT1/PIK3R4/PIK3AP1/TAB2/TAB3/NFKBIA/HSP90B1/MYD88/FADD/IRAK1/RPS6KA3
GO_ORGANIC_HYDROXY_COMPOUND_METABOLIC_PROCESS	GO_ORGANIC_HYDROXY_COMPOUND_METABOLIC_PROCESS	408	0.470332	1.40716	0.00364818	0.0361031	0.028419	2755	tags=27%, list=18%, signal=23%	3553/9464/130367/23657/5031/3269/3642/1577/654/6615/4790/1717/7124/2710/8854/51700/3638/8877/23541/2643/3939/4864/51141/3632/6309/5641/5467/9839/51573/3458/11001/9562/8871/6721/54928/4157/117247/256356/3157/8578/64768/650/2805/253430/7042/5447/80271/3949/4923/8818/157506/9693/134429/81537/9807/11161/7474/7167/8309/10558/5469/116150/114883/50814/4779/51422/5341/2260/1727/114880/7421/341/147015/126…	IL1B/HAND2/SGPP2/SLC7A11/P2RY6/HRH1/INSM1/CYP3A5/BMP6/SNAI1/NFKB1/DHCR7/TNF/GK/ALDH1A2/CYB5R2/INSIG1/SPHK1/SEC14L2/GCH1/LDHA/NPC1/INSIG2/INPP5A/SC5D/LGMN/PPARD/ZEB2/GDE1/IFNG/SLC27A2/MINPP1/SYNJ2/SREBF2/BPNT2/MC1R/SLC16A10/GK5/HMGCS1/SCARF1/IPPK/BMP2/GOT1/IPMK/TGFB2/POR/ITPKC/LDLR/NTSR1/DPM2/RDH10/RAPGEF2/STARD4/SGPP1/IP6K1/ERG28/WNT5A/TPI1/ACOX2/SPTLC1/MED1/NUS1/OSBPL9/NSDHL/NFE2L1/PRKAG2/PLEK/F…
GO_NEGATIVE_REGULATION_OF_INTERLEUKIN_10_PRODUCTION	GO_NEGATIVE_REGULATION_OF_INTERLEUKIN_10_PRODUCTION	14	0.855077	1.73623	0.00369323	0.0363569	0.0286188	143	tags=21%, list=1%, signal=21%	8288/29126/51561	EPX/CD274/IL23A
GO_NEPHRON_EPITHELIUM_DEVELOPMENT	GO_NEPHRON_EPITHELIUM_DEVELOPMENT	69	0.644971	1.67324	0.00369565	0.0363569	0.0286188	1295	tags=17%, list=8%, signal=16%	26585/7490/7471/10409/7422/6772/3976/4851/650/84445/4853/28514	GREM1/WT1/WNT1/BASP1/VEGFA/STAT1/LIF/NOTCH1/BMP2/LZTS2/NOTCH2/DLL1
GO_STRESS_ACTIVATED_PROTEIN_KINASE_SIGNALING_CASCADE	GO_STRESS_ACTIVATED_PROTEIN_KINASE_SIGNALING_CASCADE	253	0.505596	1.48114	0.00370166	0.0363569	0.0286188	2869	tags=32%, list=19%, signal=26%	3553/9464/3656/1906/7185/4790/7124/7098/1236/355/8877/7422/1326/136/79155/80149/51776/6386/7187/9839/9175/5770/2043/5610/2081/23118/2889/650/7042/257397/7855/5063/10371/9043/6416/7474/27250/10125/7186/3654/9448/5048/10269/11235/23291/7984/10298/83737/344558/5599/54910/8737/2122/10045/9867/351/4067/3301/1432/9258/2150/3156/5734/9770/64127/140885/4077/8491/5600/10746/2074/1540/57551/9821/51347/5604…	IL1B/HAND2/IRAK2/EDN1/TRAF1/NFKB1/TNF/TLR3/CCR7/FAS/SPHK1/VEGFA/MAP3K8/ADORA2B/TNIP2/ZC3H12A/MAP3K20/SDCBP/TRAF3/ZEB2/MAP3K13/PTPN1/EPHA4/EIF2AK2/ERN1/TAB2/RAPGEF1/BMP2/TGFB2/TAB3/FZD5/PAK3/SEMA3A/SPAG9/MAP2K4/WNT5A/PDCD4/RASGRP1/TRAF2/IRAK1/MAP4K4/PAFAH1B1/ZMPSTE24/PDCD10/FBXW11/ARHGEF5/PAK4/ITCH/SH3RF3/MAPK8/SEMA4C/RIPK1/MECOM/SH2D3A/PJA2/APP/LYN/DNAJA1/MAPK14/MFHAS1/F2RL1/HMGCR/PTGER4/RASSF2/N…
GO_AMINOGLYCAN_BIOSYNTHETIC_PROCESS	GO_AMINOGLYCAN_BIOSYNTHETIC_PROCESS	93	0.607007	1.63378	0.00370496	0.0363569	0.0286188	1377	tags=22%, list=9%, signal=20%	3553/29940/4790/3036/9953/6385/9334/375790/9435/57214/56548/50515/22856/6483/6482/6484/10678/7040/1213/1464	IL1B/DSE/NFKB1/HAS1/HS3ST3B1/SDC4/B4GALT5/AGRN/CHST2/CEMIP/CHST7/CHST11/CHSY1/ST3GAL2/ST3GAL1/ST3GAL4/B3GNT2/TGFB1/CLTC/CSPG4
GO_VASCULAR_ENDOTHELIAL_GROWTH_FACTOR_RECEPTOR_SIGNALING_PATHWAY	GO_VASCULAR_ENDOTHELIAL_GROWTH_FACTOR_RECEPTOR_SIGNALING_PATHWAY	84	0.61944	1.64696	0.00374675	0.0366899	0.028881	804	tags=13%, list=5%, signal=12%	3553/2321/8828/6714/5291/9047/7422/3685/558/1398/5770	IL1B/FLT1/NRP2/SRC/PIK3CB/SH2D2A/VEGFA/ITGAV/AXL/CRK/PTPN1
GO_ESTABLISHMENT_OF_ENDOTHELIAL_BARRIER	GO_ESTABLISHMENT_OF_ENDOTHELIAL_BARRIER	42	0.710149	1.72119	0.00375469	0.0366907	0.0288816	1277	tags=26%, list=8%, signal=24%	3553/3383/7124/7422/5144/2889/50848/5906/26051/9693/5908	IL1B/ICAM1/TNF/VEGFA/PDE4D/RAPGEF1/F11R/RAP1A/PPP1R16B/RAPGEF2/RAP1B
GO_NEGATIVE_REGULATION_OF_HORMONE_SECRETION	GO_NEGATIVE_REGULATION_OF_HORMONE_SECRETION	42	0.709871	1.72052	0.00378251	0.0368854	0.0290348	463	tags=10%, list=3%, signal=9%	3553/3589/1906/3976	IL1B/IL11/EDN1/LIF
GO_POSITIVE_REGULATION_OF_INTERLEUKIN_1_PRODUCTION	GO_POSITIVE_REGULATION_OF_INTERLEUKIN_1_PRODUCTION	50	0.686909	1.7067	0.00379453	0.0369255	0.0290664	1313	tags=26%, list=9%, signal=24%	6348/114548/7124/84868/5005/10892/3458/6774/24145/3428/7855/5004/7474	CCL3/NLRP3/TNF/HAVCR2/ORM2/MALT1/IFNG/STAT3/PANX1/IFI16/FZD5/ORM1/WNT5A
GO_POSITIVE_REGULATION_OF_RESPONSE_TO_CYTOKINE_STIMULUS	GO_POSITIVE_REGULATION_OF_RESPONSE_TO_CYTOKINE_STIMULUS	51	0.683591	1.70314	0.00382275	0.0371228	0.0292217	2028	tags=41%, list=13%, signal=36%	3554/1906/64135/1435/23586/3665/558/83666/10555/837/7474/8772/6880/7186/3093/5469/5048/6868/54625/8737/7097	IL1R1/EDN1/IFIH1/CSF1/DDX58/IRF7/AXL/PARP9/AGPAT2/CASP4/WNT5A/FADD/TAF9/TRAF2/UBE2K/MED1/PAFAH1B1/ADAM17/PARP14/RIPK1/TLR2
GO_REGULATION_OF_BEHAVIOR	GO_REGULATION_OF_BEHAVIOR	43	0.70734	1.71944	0.00383864	0.0371998	0.0292823	742	tags=12%, list=5%, signal=11%	6348/8013/84251/56729/6774	CCL3/NR4A3/SGIP1/RETN/STAT3
GO_REGULATION_OF_CELLULAR_KETONE_METABOLIC_PROCESS	GO_REGULATION_OF_CELLULAR_KETONE_METABOLIC_PROCESS	150	0.554403	1.56573	0.00387251	0.0374503	0.0294795	1908	tags=19%, list=12%, signal=17%	3553/5743/23657/8013/654/151176/3638/57761/51141/551/51582/5467/79602/5716/650/5163/157506/134429/5468/4779/51422/9491/2170/341/5695/5704/5713/84649	IL1B/PTGS2/SLC7A11/NR4A3/BMP6/ERFE/INSIG1/TRIB3/INSIG2/AVP/AZIN1/PPARD/ADIPOR2/PSMD10/BMP2/PDK1/RDH10/STARD4/PPARG/NFE2L1/PRKAG2/PSMF1/FABP3/APOC1/PSMB7/PSMC4/PSMD7/DGAT2
GO_CELL_KILLING	GO_CELL_KILLING	121	0.576441	1.59573	0.0039634	0.0382375	0.0300992	1536	tags=21%, list=10%, signal=19%	718/51561/5272/1511/1991/3383/80329/80328/84868/820/79465/1604/3458/1398/6845/2597/3105/8772/4068/10125/57823/3902/5873/3140/57817	C3/IL23A/SERPINB9/CTSG/ELANE/ICAM1/ULBP1/ULBP2/HAVCR2/CAMP/ULBP3/CD55/IFNG/CRK/VAMP7/GAPDH/HLA-A/FADD/SH2D1A/RASGRP1/SLAMF7/LAG3/RAB27A/MR1/HAMP
GO_POSITIVE_REGULATION_OF_LEUKOCYTE_MEDIATED_IMMUNITY	GO_POSITIVE_REGULATION_OF_LEUKOCYTE_MEDIATED_IMMUNITY	122	0.57588	1.59546	0.00397029	0.0382375	0.0300992	1483	tags=20%, list=10%, signal=19%	3553/718/3554/51561/114548/7124/23586/136/2624/148022/10892/7037/4049/6845/7855/7040/81545/3105/55183/8772/4068/10125/7186/3902/3140	IL1B/C3/IL1R1/IL23A/NLRP3/TNF/DDX58/ADORA2B/GATA2/TICAM1/MALT1/TFRC/LTA/VAMP7/FZD5/TGFB1/FBXO38/HLA-A/RIF1/FADD/SH2D1A/RASGRP1/TRAF2/LAG3/MR1
GO_MONOCARBOXYLIC_ACID_BIOSYNTHETIC_PROCESS	GO_MONOCARBOXYLIC_ACID_BIOSYNTHETIC_PROCESS	176	0.537679	1.53737	0.00400562	0.0384222	0.0302445	1805	tags=18%, list=12%, signal=16%	3553/5743/1906/29940/79993/241/8854/3638/57761/51141/551/8560/79602/11343/11001/11057/5564/54995/9444/7494/157506/134429/8309/1464/5571/114883/51422/5315/8564/114880/341	IL1B/PTGS2/EDN1/DSE/ELOVL7/ALOX5AP/ALDH1A2/INSIG1/TRIB3/INSIG2/AVP/DEGS1/ADIPOR2/MGLL/SLC27A2/ABHD2/PRKAB1/OXSM/QKI/XBP1/RDH10/STARD4/ACOX2/CSPG4/PRKAG1/OSBPL9/PRKAG2/PKM/KMO/OSBPL6/APOC1
GO_REGULATION_OF_WOUND_HEALING	GO_REGULATION_OF_WOUND_HEALING	111	0.58568	1.60675	0.00400591	0.0384222	0.0302445	2442	tags=30%, list=16%, signal=25%	5055/2152/1906/5329/7057/7124/4780/7035/5328/84830/7128/1398/50848/3688/7494/135228/23332/114897/10565/6239/23189/5154/5341/5747/5624/2039/199731/4088/4627/4067/301/2150/3156	SERPINB2/F3/EDN1/PLAUR/THBS1/TNF/NFE2L2/TFPI/PLAU/ADTRP/TNFAIP3/CRK/F11R/ITGB1/XBP1/CD109/CLASP1/C1QTNF1/ARFGEF1/RREB1/KANK1/PDGFA/PLEK/PTK2/PROC/DMTN/CADM4/SMAD3/MYH9/LYN/ANXA1/F2RL1/HMGCR
GO_EMBRYO_IMPLANTATION	GO_EMBRYO_IMPLANTATION	43	0.706138	1.71652	0.00401879	0.0384668	0.0302796	736	tags=19%, list=5%, signal=18%	3553/5743/7422/7076/3976/27161/5467/682	IL1B/PTGS2/VEGFA/TIMP1/LIF/AGO2/PPARD/BSG
GO_ENDOCRINE_PANCREAS_DEVELOPMENT	GO_ENDOCRINE_PANCREAS_DEVELOPMENT	29	0.755826	1.73002	0.00403459	0.0385103	0.0303139	178	tags=10%, list=1%, signal=10%	84504/3642/654	NKX6-2/INSM1/BMP6
GO_POSITIVE_REGULATION_OF_STRIATED_MUSCLE_CELL_DIFFERENTIATION	GO_POSITIVE_REGULATION_OF_STRIATED_MUSCLE_CELL_DIFFERENTIATION	37	0.72584	1.72394	0.00403983	0.0385103	0.0303139	2104	tags=43%, list=14%, signal=37%	26585/4283/1906/4323/8740/10938/10211/9794/575/4773/7040/57817/3516/3566/9643/64855	GREM1/CXCL9/EDN1/MMP14/TNFSF14/EHD1/FLOT1/MAML1/ADGRB1/NFATC2/TGFB1/HAMP/RBPJ/IL4R/MORF4L2/NIBAN2
GO_NEGATIVE_REGULATION_OF_LIPID_CATABOLIC_PROCESS	GO_NEGATIVE_REGULATION_OF_LIPID_CATABOLIC_PROCESS	20	0.806655	1.74	0.00411258	0.0391239	0.0307969	241	tags=15%, list=2%, signal=15%	3553/338442/7124	IL1B/HCAR2/TNF
GO_NEGATIVE_REGULATION_OF_LIPID_METABOLIC_PROCESS	GO_NEGATIVE_REGULATION_OF_LIPID_METABOLIC_PROCESS	71	0.638781	1.66326	0.00412445	0.0391571	0.030823	741	tags=15%, list=5%, signal=15%	3553/6615/4790/338442/7124/3638/8877/57761/51141/79888/9711	IL1B/SNAI1/NFKB1/HCAR2/TNF/INSIG1/SPHK1/TRIB3/INSIG2/LPCAT1/RUBCN
GO_FORMATION_OF_PRIMARY_GERM_LAYER	GO_FORMATION_OF_PRIMARY_GERM_LAYER	88	0.610679	1.63368	0.00418097	0.0395092	0.0311002	1824	tags=23%, list=12%, signal=20%	8013/3914/1846/6615/4323/23135/1844/3685/57045/79577/3688/3909/659/2114/7296/7474/2260/1847/6886/1294	NR4A3/LAMB3/DUSP4/SNAI1/MMP14/KDM6B/DUSP2/ITGAV/TWSG1/CDC73/ITGB1/LAMA3/BMPR2/ETS2/TXNRD1/WNT5A/FGFR1/DUSP5/TAL1/COL7A1
GO_MEMBRANE_PROTEIN_PROTEOLYSIS	GO_MEMBRANE_PROTEIN_PROTEOLYSIS	57	0.665578	1.68445	0.004182	0.0395092	0.0311002	1296	tags=25%, list=8%, signal=23%	3553/4790/7124/5979/3586/7133/7076/5657/101/3458/5045/84888/7040/5663	IL1B/NFKB1/TNF/RET/IL10/TNFRSF1B/TIMP1/PRTN3/ADAM8/IFNG/FURIN/SPPL2A/TGFB1/PSEN1
GO_REGULATION_OF_HUMORAL_IMMUNE_RESPONSE	GO_REGULATION_OF_HUMORAL_IMMUNE_RESPONSE	46	0.695178	1.7069	0.00418691	0.0395092	0.0311002	634	tags=15%, list=4%, signal=15%	3553/629/718/7124/1236/1604/124976	IL1B/CFB/C3/TNF/CCR7/CD55/SPNS2
GO_T_CELL_APOPTOTIC_PROCESS	GO_T_CELL_APOPTOTIC_PROCESS	43	0.705101	1.714	0.00422666	0.0396857	0.0312391	1608	tags=23%, list=10%, signal=21%	3559/29126/384/356/355/101/7474/8772/5133/3958	IL2RA/CD274/ARG2/FASLG/FAS/ADAM8/WNT5A/FADD/PDCD1/LGALS3
GO_BEHAVIOR	GO_BEHAVIOR	413	0.467041	1.39772	0.0042282	0.0396857	0.0312391	2337	tags=19%, list=15%, signal=16%	5743/9464/6348/80045/23657/6506/23551/8013/3269/84251/6547/7057/9456/7111/6860/56729/4864/124925/4914/79924/57731/551/5641/27/378/836/6774/1267/4891/6712/2043/8301/372/1476/3688/10769/3949/4923/6517/6616/6310/4763/5663/8772/338811/85461/84896/5048/3061/4885/10269/4130/135/26058/56172/54413/6886/8701/3398/130507/114781/23259/5025/9455/7097/3815/2534/54806/9867/3845/729956/4204/538/351/79809/51083/…	PTGS2/HAND2/CCL3/GPR157/SLC7A11/SLC1A2/RASD2/NR4A3/HRH1/SGIP1/SLC8A3/THBS1/HOMER1/TMOD1/SYT4/RETN/NPC1/SEZ6/NTRK1/ADM2/SPTBN4/AVP/LGMN/ABL2/ARF4/CASP3/STAT3/CNP/SLC11A2/SPTBN2/EPHA4/PICALM/ARCN1/CSTB/ITGB1/PLK2/LDLR/NTSR1/SLC2A4/SNAP25/ATXN1/NF1/PSEN1/FADD/TAFA2/TANC1/ATAD1/PAFAH1B1/HCRTR1/NPTX2/ZMPSTE24/MAP1A/ADORA2A/GIGYF2/ANKH/NLGN3/TAL1/DNAH11/ID2/UBR3/BTBD9/DDHD2/P2RX4/HOMER2/TLR2/KIT/FYN/AH…
GO_ENSHEATHMENT_OF_NEURONS	GO_ENSHEATHMENT_OF_NEURONS	119	0.575892	1.59128	0.0042311	0.0396857	0.0312391	699	tags=10%, list=5%, signal=10%	84504/400746/6547/8530/23136/6497/9334/7133/8560/5467/4664/4155	NKX6-2/NCMAP/SLC8A3/CST7/EPB41L3/SKI/B4GALT5/TNFRSF1B/DEGS1/PPARD/NAB1/MBP
GO_OLIGODENDROCYTE_DIFFERENTIATION	GO_OLIGODENDROCYTE_DIFFERENTIATION	78	0.624389	1.64529	0.00424583	0.0397441	0.0312851	786	tags=10%, list=5%, signal=10%	84504/56978/6547/664/9334/7133/4851/1267	NKX6-2/PRDM8/SLC8A3/BNIP3/B4GALT5/TNFRSF1B/NOTCH1/CNP
GO_POSITIVE_REGULATION_OF_LYMPHOCYTE_CHEMOTAXIS	GO_POSITIVE_REGULATION_OF_LYMPHOCYTE_CHEMOTAXIS	16	0.834671	1.73404	0.00425746	0.0397538	0.0312928	475	tags=31%, list=3%, signal=30%	6348/6351/6354/8740/9943	CCL3/CCL4/CCL7/TNFSF14/OXSR1
GO_ASTROCYTE_DEVELOPMENT	GO_ASTROCYTE_DEVELOPMENT	33	0.737608	1.72381	0.0042639	0.0397538	0.0312928	1694	tags=33%, list=11%, signal=30%	3553/7124/3458/2358/3949/7431/4763/28514/5663/135/6279	IL1B/TNF/IFNG/FPR2/LDLR/VIM/NF1/DLL1/PSEN1/ADORA2A/S100A8
GO_REGULATION_OF_ALPHA_BETA_T_CELL_DIFFERENTIATION	GO_REGULATION_OF_ALPHA_BETA_T_CELL_DIFFERENTIATION	56	0.66711	1.68492	0.00428634	0.0398834	0.0313948	1857	tags=30%, list=12%, signal=27%	51561/114548/941/8651/639/80149/10892/3458/4860/64332/54542/8546/9308/246778/864/861/3566	IL23A/NLRP3/CD80/SOCS1/PRDM1/ZC3H12A/MALT1/IFNG/PNP/NFKBIZ/RC3H2/AP3B1/CD83/IL27/RUNX3/NA/IL4R
GO_REGULATION_OF_T_CELL_CYTOKINE_PRODUCTION	GO_REGULATION_OF_T_CELL_CYTOKINE_PRODUCTION	28	0.758731	1.72659	0.00432416	0.0401554	0.0316089	1379	tags=29%, list=9%, signal=26%	3553/3554/114548/7133/10892/7855/3105/7186	IL1B/IL1R1/NLRP3/TNFRSF1B/MALT1/FZD5/HLA-A/TRAF2
GO_POSITIVE_REGULATION_OF_STRESS_ACTIVATED_PROTEIN_KINASE_SIGNALING_CASCADE	GO_POSITIVE_REGULATION_OF_STRESS_ACTIVATED_PROTEIN_KINASE_SIGNALING_CASCADE	146	0.554302	1.56128	0.00434428	0.0402621	0.0316929	1379	tags=19%, list=9%, signal=18%	3553/9464/1906/7185/7124/7098/1236/8877/7422/80149/51776/6386/7187/9839/9175/5770/2043/5610/2081/650/7042/7855/10371/9043/6416/7474/10125/7186	IL1B/HAND2/EDN1/TRAF1/TNF/TLR3/CCR7/SPHK1/VEGFA/ZC3H12A/MAP3K20/SDCBP/TRAF3/ZEB2/MAP3K13/PTPN1/EPHA4/EIF2AK2/ERN1/BMP2/TGFB2/FZD5/SEMA3A/SPAG9/MAP2K4/WNT5A/RASGRP1/TRAF2
GO_ENDOCRINE_PROCESS	GO_ENDOCRINE_PROCESS	56	0.66655	1.68351	0.00437894	0.0403854	0.0317899	454	tags=14%, list=3%, signal=14%	3553/1906/1511/654/338442/1889/56729/1636	IL1B/EDN1/CTSG/BMP6/HCAR2/ECE1/RETN/ACE
GO_POSITIVE_REGULATION_OF_CHEMOKINE_PRODUCTION	GO_POSITIVE_REGULATION_OF_CHEMOKINE_PRODUCTION	45	0.698577	1.70983	0.00438133	0.0403854	0.0317899	1047	tags=27%, list=7%, signal=25%	3553/9173/7124/7098/84868/136/148022/3458/4155/58515/5610/255231	IL1B/IL1RL1/TNF/TLR3/HAVCR2/ADORA2B/TICAM1/IFNG/MBP/SELENOK/EIF2AK2/MCOLN2
GO_POSITIVE_REGULATION_OF_STEROID_BIOSYNTHETIC_PROCESS	GO_POSITIVE_REGULATION_OF_STEROID_BIOSYNTHETIC_PROCESS	15	0.842529	1.73124	0.00438352	0.0403854	0.0317899	1222	tags=40%, list=8%, signal=37%	3553/654/7124/3458/5447/134429	IL1B/BMP6/TNF/IFNG/POR/STARD4
GO_GLIAL_CELL_DEVELOPMENT	GO_GLIAL_CELL_DEVELOPMENT	98	0.597513	1.61764	0.00439531	0.0404144	0.0318127	2328	tags=27%, list=15%, signal=23%	84504/3553/400746/56978/7124/6497/9334/3458/2358/3949/7431/4763/28514/5663/135/6279/3398/8892/5453/7097/10397/3845/9968/2934/351/4067	NKX6-2/IL1B/NCMAP/PRDM8/TNF/SKI/B4GALT5/IFNG/FPR2/LDLR/VIM/NF1/DLL1/PSEN1/ADORA2A/S100A8/ID2/EIF2B2/POU3F1/TLR2/NDRG1/KRAS/MED12/GSN/APP/LYN
GO_REGULATION_OF_NEUTROPHIL_CHEMOTAXIS	GO_REGULATION_OF_NEUTROPHIL_CHEMOTAXIS	29	0.752241	1.72181	0.00444992	0.0407926	0.0321105	272	tags=14%, list=2%, signal=14%	3576/51561/1906/1236	CXCL8/IL23A/EDN1/CCR7
GO_NEGATIVE_REGULATION_BY_HOST_OF_VIRAL_TRANSCRIPTION	GO_NEGATIVE_REGULATION_BY_HOST_OF_VIRAL_TRANSCRIPTION	13	0.857804	1.72023	0.00446383	0.0407926	0.0321105	34	tags=15%, list=0%, signal=15%	6348/6351	CCL3/CCL4
GO_REGULATION_OF_BONE_MINERALIZATION	GO_REGULATION_OF_BONE_MINERALIZATION	60	0.65793	1.67771	0.00447059	0.0407926	0.0321105	1468	tags=20%, list=10%, signal=18%	6348/26585/9636/654/5552/490/650/659/7040/92/54880/10269	CCL3/GREM1/ISG15/BMP6/SRGN/ATP2B1/BMP2/BMPR2/TGFB1/ACVR2A/BCOR/ZMPSTE24
GO_DETOXIFICATION	GO_DETOXIFICATION	102	0.593018	1.61356	0.00447138	0.0407926	0.0321105	1264	tags=17%, list=8%, signal=15%	5743/8288/6648/7124/241/4780/1193/2643/140809/9446/25824/83667/55829/119391/10516/7296/2882	PTGS2/EPX/SOD2/TNF/ALOX5AP/NFE2L2/CLIC2/GCH1/SRXN1/GSTO1/PRDX5/SESN2/SELENOS/GSTO2/FBLN5/TXNRD1/GPX7
GO_MYELOID_CELL_HOMEOSTASIS	GO_MYELOID_CELL_HOMEOSTASIS	139	0.558869	1.56729	0.00450167	0.0409344	0.0322221	3795	tags=47%, list=25%, signal=35%	23657/9636/338442/5142/5291/7422/6772/558/2624/211/836/669/6774/4891/103/92/23774/5469/29843/6005/272/7049/161882/4779/3658/6868/6886/55904/6521/3398/3815/23376/2039/3718/9991/4067/1432/301/116151/9258/567/2034/91/2038/23210/10296/407006/3202/10461/7564/2207/578/51522/3313/8861/2309/28996/94081/6647/28982/6208/29766/50943/6670/6688	SLC7A11/ISG15/HCAR2/PDE4B/PIK3CB/VEGFA/STAT1/AXL/GATA2/ALAS1/CASP3/BPGM/STAT3/SLC11A2/ADAR/ACVR2A/BRD1/MED1/SENP1/RHAG/AMPD3/TGFBR3/ZFPM1/NFE2L1/IREB2/ADAM17/TAL1/KMT2E/SLC4A1/ID2/KIT/UFL1/DMTN/JAK3/PTBP3/LYN/MAPK14/ANXA1/FAM210B/MFHAS1/B2M/EPAS1/ACVR1B/EPB42/JMJD6/MAEA/MIR221/HOXA5/MERTK/ZNF16/FCER1G/BAK1/TMEM14C/HSPA9/LDB1/FOXO3/HIPK2/SFXN1/SOD1/FLVCR1/RPS14/NA/FOXP3/SP3/SPI1
GO_REGULATION_OF_INTRINSIC_APOPTOTIC_SIGNALING_PATHWAY	GO_REGULATION_OF_INTRINSIC_APOPTOTIC_SIGNALING_PATHWAY	145	0.554085	1.5602	0.00450445	0.0409344	0.0322221	1517	tags=17%, list=10%, signal=16%	5743/6648/5329/6615/4780/1687/6714/960/6498/57007/4582/637/5034/5770/2907/10105/55829/7494/7009/10955/64844/2023/6880/50484/5598	PTGS2/SOD2/PLAUR/SNAI1/NFE2L2/GSDME/SRC/CD44/SKIL/ACKR3/MUC1/BID/P4HB/PTPN1/GRINA/PPIF/SELENOS/XBP1/TMBIM6/SERINC3/MARCHF7/ENO1/TAF9/RRM2B/MAPK7
GO_CELL_SURFACE_RECEPTOR_SIGNALING_PATHWAY_INVOLVED_IN_HEART_DEVELOPMENT	GO_CELL_SURFACE_RECEPTOR_SIGNALING_PATHWAY_INVOLVED_IN_HEART_DEVELOPMENT	22	0.792069	1.73512	0.00452138	0.0410085	0.0322804	1313	tags=36%, list=9%, signal=33%	9464/115701/6615/4851/650/7040/4853/7474	HAND2/ALPK2/SNAI1/NOTCH1/BMP2/TGFB1/NOTCH2/WNT5A
GO_RESPONSE_TO_ISCHEMIA	GO_RESPONSE_TO_ISCHEMIA	46	0.692714	1.70085	0.00455634	0.0412455	0.0324669	1368	tags=20%, list=9%, signal=18%	2853/2706/1435/3099/24145/10105/23172/8878/56666	GPR31/GJB2/CSF1/HK2/PANX1/PPIF/ABRAXAS2/SQSTM1/PANX2
GO_REGULATION_OF_BIOMINERALIZATION	GO_REGULATION_OF_BIOMINERALIZATION	69	0.639276	1.65847	0.00457801	0.0413304	0.0325338	1468	tags=19%, list=10%, signal=17%	6348/26585/9636/654/5552/490/4851/650/659/7040/92/54880/10269	CCL3/GREM1/ISG15/BMP6/SRGN/ATP2B1/NOTCH1/BMP2/BMPR2/TGFB1/ACVR2A/BCOR/ZMPSTE24
GO_NEURON_DEATH_IN_RESPONSE_TO_OXIDATIVE_STRESS	GO_NEURON_DEATH_IN_RESPONSE_TO_OXIDATIVE_STRESS	29	0.751198	1.71942	0.00458341	0.0413304	0.0325338	320	tags=17%, list=2%, signal=17%	23657/8013/7471/3586/135112	SLC7A11/NR4A3/WNT1/IL10/NCOA7
GO_POSITIVE_REGULATION_OF_MACROPHAGE_MIGRATION	GO_POSITIVE_REGULATION_OF_MACROPHAGE_MIGRATION	21	0.797535	1.73536	0.00460815	0.0413936	0.0325835	243	tags=19%, list=2%, signal=19%	6348/7057/1435/4323	CCL3/THBS1/CSF1/MMP14
GO_POSITIVE_REGULATION_OF_STEROID_METABOLIC_PROCESS	GO_POSITIVE_REGULATION_OF_STEROID_METABOLIC_PROCESS	21	0.797535	1.73536	0.00460815	0.0413936	0.0325835	1222	tags=29%, list=8%, signal=26%	3553/654/7124/3458/5447/134429	IL1B/BMP6/TNF/IFNG/POR/STARD4
GO_RESPONSE_TO_TOXIC_SUBSTANCE	GO_RESPONSE_TO_TOXIC_SUBSTANCE	192	0.52634	1.51483	0.0046391	0.0415857	0.0327348	1264	tags=13%, list=8%, signal=12%	5743/6348/6351/8288/23657/6648/7124/241/4780/1193/2643/23135/140809/9446/25841/4155/1267/2235/25824/83667/55829/119391/10516/7296/2882	PTGS2/CCL3/CCL4/EPX/SLC7A11/SOD2/TNF/ALOX5AP/NFE2L2/CLIC2/GCH1/KDM6B/SRXN1/GSTO1/ABTB2/MBP/CNP/FECH/PRDX5/SESN2/SELENOS/GSTO2/FBLN5/TXNRD1/GPX7
GO_POSITIVE_REGULATION_OF_I_KAPPAB_KINASE_NF_KAPPAB_SIGNALING	GO_POSITIVE_REGULATION_OF_I_KAPPAB_KINASE_NF_KAPPAB_SIGNALING	172	0.536255	1.53109	0.00464735	0.0415857	0.0327348	1547	tags=19%, list=10%, signal=17%	3553/24138/356/7124/7098/1236/6737/330/329/1491/10758/8743/79155/148022/10892/7037/5966/54602/8837/27032/9516/23118/7706/257397/10769/25/4615/85363/8772/7186/3654/8795/23476	IL1B/IFIT5/FASLG/TNF/TLR3/CCR7/TRIM21/BIRC3/BIRC2/CTH/TRAF3IP2/TNFSF10/TNIP2/TICAM1/MALT1/TFRC/REL/NDFIP2/CFLAR/ATP2C1/LITAF/TAB2/TRIM25/TAB3/PLK2/ABL1/MYD88/TRIM5/FADD/TRAF2/IRAK1/TNFRSF10B/BRD4
GO_ESTABLISHMENT_OF_EPITHELIAL_CELL_POLARITY	GO_ESTABLISHMENT_OF_EPITHELIAL_CELL_POLARITY	26	-0.647836	-1.77078	0.00469609	0.0419416	0.0330149	1844	tags=35%, list=12%, signal=30%	85302/4649/399687/23094/23616/4983/5754/56288/163183	FBF1/MYO9A/MYO18A/SIPA1L3/SH3BP1/OPHN1/PTK7/PARD3/SYNE4
GO_POSITIVE_REGULATION_OF_MAP_KINASE_ACTIVITY	GO_POSITIVE_REGULATION_OF_MAP_KINASE_ACTIVITY	222	0.511798	1.48726	0.00471292	0.0420116	0.03307	1712	tags=23%, list=11%, signal=20%	3553/23566/3656/2321/1906/1991/7057/7124/5979/151/6714/5291/7422/1326/136/4914/51776/9839/101/9175/7046/1398/5770/2043/5610/2081/23118/2889/650/257397/8682/7855/5063/7040/9043/6416/23533/5663/7474/10125/1464/7186/3654/56034/11235/8649/5154/1848/7984/2260	IL1B/LPAR3/IRAK2/FLT1/EDN1/ELANE/THBS1/TNF/RET/ADRA2B/SRC/PIK3CB/VEGFA/MAP3K8/ADORA2B/NTRK1/MAP3K20/ZEB2/ADAM8/MAP3K13/TGFBR1/CRK/PTPN1/EPHA4/EIF2AK2/ERN1/TAB2/RAPGEF1/BMP2/TAB3/PEA15/FZD5/PAK3/TGFB1/SPAG9/MAP2K4/PIK3R5/PSEN1/WNT5A/RASGRP1/CSPG4/TRAF2/IRAK1/PDGFC/PDCD10/LAMTOR3/PDGFA/DUSP6/ARHGEF5/FGFR1
GO_NEGATIVE_REGULATION_OF_BMP_SIGNALING_PATHWAY	GO_NEGATIVE_REGULATION_OF_BMP_SIGNALING_PATHWAY	35	0.728491	1.71669	0.0047358	0.0421351	0.0331672	1313	tags=26%, list=9%, signal=24%	26585/7471/6497/6498/4681/4851/57045/25/7474	GREM1/WNT1/SKI/SKIL/NA/NOTCH1/TWSG1/ABL1/WNT5A
GO_POSITIVE_REGULATION_OF_CHEMOKINE_BIOSYNTHETIC_PROCESS	GO_POSITIVE_REGULATION_OF_CHEMOKINE_BIOSYNTHETIC_PROCESS	11	0.87553	1.71067	0.00479112	0.0425458	0.0334905	686	tags=45%, list=4%, signal=43%	3553/7124/7098/148022/3458	IL1B/TNF/TLR3/TICAM1/IFNG
GO_CHEMOKINE_PRODUCTION	GO_CHEMOKINE_PRODUCTION	72	0.632829	1.65045	0.00480018	0.0425458	0.0334905	1047	tags=21%, list=7%, signal=20%	3553/384/9173/1991/7124/7098/3586/84868/136/148022/3458/4155/58515/5610/255231	IL1B/ARG2/IL1RL1/ELANE/TNF/TLR3/IL10/HAVCR2/ADORA2B/TICAM1/IFNG/MBP/SELENOK/EIF2AK2/MCOLN2
GO_POSITIVE_REGULATION_OF_CALCIUM_MEDIATED_SIGNALING	GO_POSITIVE_REGULATION_OF_CALCIUM_MEDIATED_SIGNALING	32	0.737717	1.71409	0.00484558	0.0428669	0.0337433	589	tags=16%, list=4%, signal=15%	6348/6351/5031/7124/9446	CCL3/CCL4/P2RY6/TNF/GSTO1
GO_POSITIVE_REGULATION_OF_LYMPHOCYTE_MEDIATED_IMMUNITY	GO_POSITIVE_REGULATION_OF_LYMPHOCYTE_MEDIATED_IMMUNITY	93	0.600039	1.61502	0.00488326	0.0431186	0.0339414	1483	tags=22%, list=10%, signal=20%	3553/718/3554/51561/114548/7124/10892/7037/4049/7855/7040/81545/3105/55183/8772/4068/10125/7186/3902/3140	IL1B/C3/IL1R1/IL23A/NLRP3/TNF/MALT1/TFRC/LTA/FZD5/TGFB1/FBXO38/HLA-A/RIF1/FADD/SH2D1A/RASGRP1/TRAF2/LAG3/MR1
GO_POSITIVE_REGULATION_OF_MYELOID_CELL_DIFFERENTIATION	GO_POSITIVE_REGULATION_OF_MYELOID_CELL_DIFFERENTIATION	82	0.614995	1.63024	0.00493315	0.0434769	0.0342234	1917	tags=29%, list=13%, signal=26%	9636/51561/1435/7124/8111/6772/3976/2624/3458/6774/760/7040/4853/92/23774/8772/54997/169200/5469/861/6886/10826/3398/8737	ISG15/IL23A/CSF1/TNF/GPR68/STAT1/LIF/GATA2/IFNG/STAT3/CA2/TGFB1/NOTCH2/ACVR2A/BRD1/FADD/TESC/TMEM64/MED1/NA/TAL1/FAXDC2/ID2/RIPK1
GO_PLATELET_DERIVED_GROWTH_FACTOR_RECEPTOR_SIGNALING_PATHWAY	GO_PLATELET_DERIVED_GROWTH_FACTOR_RECEPTOR_SIGNALING_PATHWAY	51	0.675354	1.68262	0.00496689	0.0436647	0.0343713	2093	tags=33%, list=14%, signal=29%	2152/8013/6714/7422/84159/5770/2889/25/5782/1464/5795/55512/56034/5154/5286/8879/9860	F3/NR4A3/SRC/VEGFA/ARID5B/PTPN1/RAPGEF1/ABL1/PTPN12/CSPG4/PTPRJ/SMPD3/PDGFC/PDGFA/PIK3C2A/SGPL1/LRIG2
GO_REGULATION_OF_LIPID_TRANSPORT	GO_REGULATION_OF_LIPID_TRANSPORT	85	0.610233	1.62473	0.00497316	0.0436647	0.0343713	1805	tags=21%, list=12%, signal=19%	3553/1906/654/7057/4790/151176/56729/3685/6721/4792/4923/5468/114897/6696/116150/114880/2170/341	IL1B/EDN1/BMP6/THBS1/NFKB1/ERFE/RETN/ITGAV/SREBF2/NFKBIA/NTSR1/PPARG/C1QTNF1/SPP1/NUS1/OSBPL6/FABP3/APOC1
GO_RRNA_BASE_METHYLATION	GO_RRNA_BASE_METHYLATION	10	-0.809748	-1.7733	0.00498887	0.0437205	0.0344152	119	tags=40%, list=1%, signal=40%	91893/55695/260294/155400	FDXACB1/NSUN5/NSUN5P2/NSUN5P1
GO_ENDOTHELIUM_DEVELOPMENT	GO_ENDOTHELIUM_DEVELOPMENT	93	0.598764	1.61159	0.00501688	0.0438837	0.0345436	1835	tags=24%, list=12%, signal=21%	3553/654/3383/7124/7422/23135/5144/4851/2889/6935/50848/5906/659/26051/9693/5908/28514/25932/57493/3516/5624/694	IL1B/BMP6/ICAM1/TNF/VEGFA/KDM6B/PDE4D/NOTCH1/RAPGEF1/ZEB1/F11R/RAP1A/BMPR2/PPP1R16B/RAPGEF2/RAP1B/DLL1/CLIC4/HEG1/RBPJ/PROC/BTG1
GO_LEUKOCYTE_AGGREGATION	GO_LEUKOCYTE_AGGREGATION	12	0.863257	1.70941	0.00504534	0.0440501	0.0346746	377	tags=25%, list=2%, signal=24%	3553/8013/960	IL1B/NR4A3/CD44
GO_NEPHRON_MORPHOGENESIS	GO_NEPHRON_MORPHOGENESIS	45	0.693034	1.69626	0.00506805	0.0441658	0.0347657	1059	tags=18%, list=7%, signal=17%	26585/7490/7471/7422/6772/3976/650/84445	GREM1/WT1/WNT1/VEGFA/STAT1/LIF/BMP2/LZTS2
GO_REGULATION_OF_EPITHELIAL_CELL_DIFFERENTIATION	GO_REGULATION_OF_EPITHELIAL_CELL_DIFFERENTIATION	111	0.579991	1.59114	0.00512851	0.0446094	0.0351149	1835	tags=20%, list=12%, signal=18%	3553/654/1514/7124/595/7422/6772/3976/200734/9839/3458/4851/6935/50848/135228/81537/28514/5469/7421/5624/861/694	IL1B/BMP6/CTSL/TNF/CCND1/VEGFA/STAT1/LIF/SPRED2/ZEB2/IFNG/NOTCH1/ZEB1/F11R/CD109/SGPP1/DLL1/MED1/VDR/PROC/NA/BTG1
GO_REGULATION_OF_MYELOID_LEUKOCYTE_DIFFERENTIATION	GO_REGULATION_OF_MYELOID_LEUKOCYTE_DIFFERENTIATION	97	0.595331	1.61024	0.00513841	0.0446125	0.0351173	1917	tags=26%, list=13%, signal=23%	6348/51561/1435/7124/7098/8111/3665/3976/2624/3458/7107/760/140685/4763/7040/4853/8772/54997/169200/161882/5295/861/6886/3398/8737	CCL3/IL23A/CSF1/TNF/TLR3/GPR68/IRF7/LIF/GATA2/IFNG/GPR137B/CA2/ZBTB46/NF1/TGFB1/NOTCH2/FADD/TESC/TMEM64/ZFPM1/PIK3R1/NA/TAL1/ID2/RIPK1
GO_ASTROCYTE_ACTIVATION	GO_ASTROCYTE_ACTIVATION	20	0.800227	1.72614	0.00517996	0.0448898	0.0353356	1600	tags=35%, list=10%, signal=31%	3553/7124/3458/2358/3949/5663/135	IL1B/TNF/IFNG/FPR2/LDLR/PSEN1/ADORA2A
GO_EPITHELIAL_TUBE_MORPHOGENESIS	GO_EPITHELIAL_TUBE_MORPHOGENESIS	241	0.503499	1.47086	0.00521378	0.0450383	0.0354525	1313	tags=15%, list=9%, signal=13%	9464/123872/26585/1906/7490/7471/1435/7124/4323/5979/441478/6385/6497/5898/6714/7422/5371/8323/9839/836/4851/8820/9645/2043/650/7042/84445/25/157506/7289/7040/4853/28514/5663/7474	HAND2/DNAAF1/GREM1/EDN1/WT1/WNT1/CSF1/TNF/MMP14/RET/NRARP/SDC4/SKI/RALA/SRC/VEGFA/PML/FZD6/ZEB2/CASP3/NOTCH1/HESX1/NA/EPHA4/BMP2/TGFB2/LZTS2/ABL1/RDH10/TULP3/TGFB1/NOTCH2/DLL1/PSEN1/WNT5A
GO_POSITIVE_REGULATION_OF_MITOTIC_CELL_CYCLE	GO_POSITIVE_REGULATION_OF_MITOTIC_CELL_CYCLE	144	0.55156	1.55195	0.00521638	0.0450383	0.0354525	2497	tags=23%, list=16%, signal=19%	3552/3553/2069/1906/595/8877/5641/57521/5514/6990/25/56257/996/5048/5586/23476/55512/286053/2260/27085/6868/6886/134353/55904/8697/675/4204/351/5781/301/26057/894/1977	IL1A/IL1B/EREG/EDN1/CCND1/SPHK1/LGMN/RPTOR/PPP1R10/DYNLT3/ABL1/MEPCE/CDC27/PAFAH1B1/PKN2/BRD4/SMPD3/NSMCE2/FGFR1/MTBP/ADAM17/TAL1/LSM11/KMT2E/CDC23/BRCA2/MECP2/APP/PTPN11/ANXA1/ANKRD17/CCND2/EIF4E
GO_RENAL_TUBULE_DEVELOPMENT	GO_RENAL_TUBULE_DEVELOPMENT	58	0.657564	1.66805	0.00523712	0.0451339	0.0355278	1295	tags=19%, list=8%, signal=17%	26585/7490/7471/7422/6772/3976/4851/650/84445/4853/28514	GREM1/WT1/WNT1/VEGFA/STAT1/LIF/NOTCH1/BMP2/LZTS2/NOTCH2/DLL1
GO_POSITIVE_REGULATION_OF_GROWTH	GO_POSITIVE_REGULATION_OF_GROWTH	207	0.516164	1.49376	0.00529869	0.0455804	0.0358793	1790	tags=20%, list=12%, signal=18%	23566/1906/7490/1435/4323/10409/6860/8877/375790/7422/23180/57731/551/6386/5467/8482/9175/5393/57521/7046/116224/4851/2803/5716/5357/7042/659/285590/23327/28514/81565/6197/5048/5479/7049/57817/6279/2260/3516/6868/2254	LPAR3/EDN1/WT1/CSF1/MMP14/BASP1/SYT4/SPHK1/AGRN/VEGFA/RFTN1/SPTBN4/AVP/SDCBP/PPARD/SEMA7A/MAP3K13/EXOSC9/RPTOR/TGFBR1/FAM122A/NOTCH1/GOLGA4/PSMD10/PLS1/TGFB2/BMPR2/SH3PXD2B/NEDD4L/DLL1/NDEL1/RPS6KA3/PAFAH1B1/PPIB/TGFBR3/HAMP/S100A8/FGFR1/RBPJ/ADAM17/FGF9
GO_REGULATION_OF_MONONUCLEAR_CELL_MIGRATION	GO_REGULATION_OF_MONONUCLEAR_CELL_MIGRATION	40	0.704944	1.69437	0.00539987	0.0463654	0.0364972	2388	tags=38%, list=16%, signal=32%	26585/7057/1435/7124/4681/5641/2358/719/7941/3958/5747/4856/10488/4067/1432	GREM1/THBS1/CSF1/TNF/NA/LGMN/FPR2/C3AR1/PLA2G7/LGALS3/PTK2/CCN3/CREB3/LYN/MAPK14
GO_GASTRULATION	GO_GASTRULATION	135	0.558379	1.562	0.00541098	0.0463756	0.0365052	1838	tags=22%, list=12%, signal=20%	3557/8013/3914/1846/6615/4323/3586/23135/1844/3685/23187/1738/60436/4155/57045/79577/3688/3909/659/2114/7296/92/7474/23332/5598/2260/1847/6886/1294/65125	IL1RN/NR4A3/LAMB3/DUSP4/SNAI1/MMP14/IL10/KDM6B/DUSP2/ITGAV/PHLDB1/DLD/TGIF2/MBP/TWSG1/CDC73/ITGB1/LAMA3/BMPR2/ETS2/TXNRD1/ACVR2A/WNT5A/CLASP1/MAPK7/FGFR1/DUSP5/TAL1/COL7A1/WNK1
GO_TELENCEPHALON_DEVELOPMENT	GO_TELENCEPHALON_DEVELOPMENT	193	0.521797	1.50242	0.00542094	0.0463759	0.0365054	1452	tags=16%, list=9%, signal=14%	23657/6506/8013/6547/597/664/85458/9638/22809/6497/23135/6513/140679/57688/8482/9839/836/23603/1398/8650/57178/650/100996717/10371/4763/5663/7474/81565/81853/5048	SLC7A11/SLC1A2/NR4A3/SLC8A3/BCL2A1/BNIP3/DIXDC1/NA/ATF5/SKI/KDM6B/SLC2A1/SLC32A1/ZSWIM6/SEMA7A/ZEB2/CASP3/CORO1C/CRK/NUMB/ZMIZ1/BMP2/NOTCH2NLC/SEMA3A/NF1/PSEN1/WNT5A/NDEL1/TMEM14B/PAFAH1B1
GO_EMBRYONIC_ORGAN_DEVELOPMENT	GO_EMBRYONIC_ORGAN_DEVELOPMENT	308	0.483679	1.43191	0.00551963	0.0471338	0.037102	2108	tags=20%, list=14%, signal=18%	9464/3576/123872/8013/1906/7471/6615/7124/4323/8854/3586/3638/639/79805/7422/3976/51141/8323/2624/22846/7005/50515/25861/54583/7046/4851/8820/9645/6935/9021/7042/7855/157506/57053/7289/7040/4853/28514/5663/7474/80714/3205/5469/50814/51098/161882/56034/5154/2260/3516/10370/2254/6886/3212/26018/196528/3398/7483/10959/55773/3815/54806/29985	HAND2/CXCL8/DNAAF1/NR4A3/EDN1/WNT1/SNAI1/TNF/MMP14/ALDH1A2/IL10/INSIG1/PRDM1/VASH2/VEGFA/LIF/INSIG2/FZD6/GATA2/VASH1/TEAD3/CHST11/WHRN/EGLN1/TGFBR1/NOTCH1/HESX1/NA/ZEB1/SOCS3/TGFB2/FZD5/RDH10/CHRNA10/TULP3/TGFB1/NOTCH2/DLL1/PSEN1/WNT5A/PBX4/HOXA9/MED1/NSDHL/IFT52/ZFPM1/PDGFC/PDGFA/FGFR1/RBPJ/CITED2/FGF9/TAL1/HOXB2/LRIG1/ARID2/ID2/WNT9A/TMED2/TBC1D23/KIT/AHI1/SLC39A3
GO_MESENCHYMAL_CELL_DIFFERENTIATION	GO_MESENCHYMAL_CELL_DIFFERENTIATION	168	0.534877	1.52446	0.0055393	0.0472155	0.0371663	1338	tags=16%, list=9%, signal=15%	3553/9464/26585/1906/6615/5979/8854/8828/80326/6772/23187/200734/6386/8482/9839/7046/23603/4851/10512/650/7042/157506/10371/7040/7474/23332/27250	IL1B/HAND2/GREM1/EDN1/SNAI1/RET/ALDH1A2/NRP2/WNT10A/STAT1/PHLDB1/SPRED2/SDCBP/SEMA7A/ZEB2/TGFBR1/CORO1C/NOTCH1/SEMA3C/BMP2/TGFB2/RDH10/SEMA3A/TGFB1/WNT5A/CLASP1/PDCD4
GO_POSITIVE_REGULATION_OF_MYOTUBE_DIFFERENTIATION	GO_POSITIVE_REGULATION_OF_MYOTUBE_DIFFERENTIATION	19	0.80566	1.72321	0.00556196	0.0472975	0.0372308	1203	tags=42%, list=8%, signal=39%	4283/4323/8740/10938/10211/9794/575/4773	CXCL9/MMP14/TNFSF14/EHD1/FLOT1/MAML1/ADGRB1/NFATC2
GO_RESPONSE_TO_INTERLEUKIN_6	GO_RESPONSE_TO_INTERLEUKIN_6	33	0.729179	1.70411	0.00556917	0.0472975	0.0372308	2398	tags=39%, list=16%, signal=33%	3383/4790/6714/22904/6772/6774/9021/57817/8737/9646/9705/5781/5970	ICAM1/NFKB1/SRC/SBNO2/STAT1/STAT3/SOCS3/HAMP/RIPK1/CTR9/ST18/PTPN11/RELA
GO_REGULATION_OF_MESONEPHROS_DEVELOPMENT	GO_REGULATION_OF_MESONEPHROS_DEVELOPMENT	14	0.843808	1.71335	0.00558975	0.0473861	0.0373006	395	tags=29%, list=3%, signal=28%	26585/7490/10409/7422	GREM1/WT1/BASP1/VEGFA
GO_REGULATION_OF_PROTEIN_MATURATION	GO_REGULATION_OF_PROTEIN_MATURATION	54	0.665595	1.67226	0.00561184	0.0474871	0.0373801	2278	tags=33%, list=15%, signal=28%	431705/8530/7057/4323/6714/330/329/85409/101/10418/4241/2023/51098/79094/7036/4627/2934/9528	ASTL/CST7/THBS1/MMP14/SRC/BIRC3/BIRC2/NKD2/ADAM8/SPON1/MELTF/ENO1/IFT52/CHAC1/TFR2/MYH9/GSN/TMEM59
GO_POSITIVE_REGULATION_OF_TRANSMEMBRANE_TRANSPORT	GO_POSITIVE_REGULATION_OF_TRANSMEMBRANE_TRANSPORT	155	0.542893	1.53767	0.00566343	0.047837	0.0376556	1864	tags=22%, list=12%, signal=19%	6506/718/5031/4283/8013/6347/3759/4780/151176/57214/8787/9446/51582/79602/3458/114882/760/10580/3688/5906/25/4923/5243/5584/5663/54997/7114/81/113451/388581/5295/54413/65125/483	SLC1A2/C3/P2RY6/CXCL9/NR4A3/CCL2/KCNJ2/NFE2L2/ERFE/CEMIP/RGS9/GSTO1/AZIN1/ADIPOR2/IFNG/OSBPL8/CA2/SORBS1/ITGB1/RAP1A/ABL1/NTSR1/ABCB1/PRKCI/PSEN1/TESC/TMSB4X/ACTN4/AZIN2/C1QTNF12/PIK3R1/NLGN3/WNK1/ATP1B3
GO_STEROID_BIOSYNTHETIC_PROCESS	GO_STEROID_BIOSYNTHETIC_PROCESS	140	0.55292	1.55194	0.00569368	0.0480058	0.0377884	1870	tags=21%, list=12%, signal=19%	3553/654/6615/4790/1717/7124/51700/3638/23541/51141/6309/3458/11001/6721/3157/650/5447/83930/134429/11161/8309/5469/114883/50814/51422/476/1727/114880/7421/10826	IL1B/BMP6/SNAI1/NFKB1/DHCR7/TNF/CYB5R2/INSIG1/SEC14L2/INSIG2/SC5D/IFNG/SLC27A2/SREBF2/HMGCS1/BMP2/POR/STARD3NL/STARD4/ERG28/ACOX2/MED1/OSBPL9/NSDHL/PRKAG2/ATP1A1/CYB5R3/OSBPL6/VDR/FAXDC2
GO_HYALURONAN_METABOLIC_PROCESS	GO_HYALURONAN_METABOLIC_PROCESS	31	0.735943	1.70179	0.00576458	0.0485159	0.03819	1237	tags=26%, list=8%, signal=24%	3553/4790/3036/960/57214/8372/7040/1213	IL1B/NFKB1/HAS1/CD44/CEMIP/HYAL3/TGFB1/CLTC
GO_REGULATION_OF_METAL_ION_TRANSPORT	GO_REGULATION_OF_METAL_ION_TRANSPORT	286	0.487672	1.43777	0.00581785	0.0488763	0.0384736	1716	tags=15%, list=11%, signal=14%	5743/6348/6351/23566/255057/5031/4283/2669/6347/3383/5142/3759/9456/1193/486/57214/9943/8787/57731/490/5371/9446/5144/3458/2040/3688/25/4923/7009/4734/23327/55151/54997/6324/283518/57817/51669/162514/135/816/3958/967/81/476	PTGS2/CCL3/CCL4/LPAR3/CBARP/P2RY6/CXCL9/GEM/CCL2/ICAM1/PDE4B/KCNJ2/HOMER1/CLIC2/FXYD2/CEMIP/OXSR1/RGS9/SPTBN4/ATP2B1/PML/GSTO1/PDE4D/IFNG/STOM/ITGB1/ABL1/NTSR1/TMBIM6/NEDD4/NEDD4L/TMEM38B/TESC/SCN1B/KCNRG/HAMP/SARAF/TRPV3/ADORA2A/CAMK2B/LGALS3/CD63/ACTN4/ATP1A1
GO_REGULATION_OF_TOLERANCE_INDUCTION	GO_REGULATION_OF_TOLERANCE_INDUCTION	16	0.826789	1.71766	0.00584995	0.0490576	0.0386164	312	tags=19%, list=2%, signal=18%	3559/29126/84868	IL2RA/CD274/HAVCR2
GO_HYALURONAN_BIOSYNTHETIC_PROCESS	GO_HYALURONAN_BIOSYNTHETIC_PROCESS	13	0.850846	1.70628	0.00587879	0.0492111	0.0387372	1560	tags=54%, list=10%, signal=48%	3553/4790/3036/57214/7040/1213/55512	IL1B/NFKB1/HAS1/CEMIP/TGFB1/CLTC/SMPD3
GO_MEIOSIS_I_CELL_CYCLE_PROCESS	GO_MEIOSIS_I_CELL_CYCLE_PROCESS	91	-0.448838	-1.56377	0.00589806	0.0492842	0.0387947	3718	tags=41%, list=24%, signal=31%	7917/151246/5888/2956/122402/25788/7153/10734/2072/10744/4439/146956/84072/27030/5890/116138/4603/51547/130951/11144/5892/23353/201254/10609/7013/80198/284071/472/285498/2067/100130958/29988/197342/10388/994/157777/79703	BAG6/SGO2/RAD51/MSH6/TDRD9/RAD54B/TOP2A/STAG3/ERCC4/PTTG2/MSH5/EME1/HORMAD1/MLH3/RAD51B/KLHDC3/MYBL1/SIRT7/M1AP/DMC1/RAD51D/SUN1/CENPX/P3H4/TERF1/MUS81/MEIOC/ATM/RNF212/ERCC1/SYCE1L/SLC2A8/EME2/SYCP2/CDC25B/MCMDC2/C11orf80
GO_EPITHELIAL_CELL_DIFFERENTIATION_INVOLVED_IN_KIDNEY_DEVELOPMENT	GO_EPITHELIAL_CELL_DIFFERENTIATION_INVOLVED_IN_KIDNEY_DEVELOPMENT	33	0.72763	1.70049	0.00594625	0.0495981	0.0390418	753	tags=18%, list=5%, signal=17%	26585/7490/10409/6772/3976/4851	GREM1/WT1/BASP1/STAT1/LIF/NOTCH1
GO_REGULATION_OF_CD4_POSITIVE_ALPHA_BETA_T_CELL_DIFFERENTIATION	GO_REGULATION_OF_CD4_POSITIVE_ALPHA_BETA_T_CELL_DIFFERENTIATION	42	0.69587	1.68658	0.00596579	0.0496388	0.0390739	2423	tags=40%, list=16%, signal=34%	51561/114548/941/8651/80149/10892/3458/64332/54542/9308/246778/864/861/3566/3718/7292/301	IL23A/NLRP3/CD80/SOCS1/ZC3H12A/MALT1/IFNG/NFKBIZ/RC3H2/CD83/IL27/RUNX3/NA/IL4R/JAK3/TNFSF4/ANXA1
GO_ENTRY_OF_BACTERIUM_INTO_HOST_CELL	GO_ENTRY_OF_BACTERIUM_INTO_HOST_CELL	14	0.842146	1.70998	0.00597238	0.0496388	0.0390739	584	tags=29%, list=4%, signal=28%	3576/6714/3685/1500	CXCL8/SRC/ITGAV/CTNND1
GO_CELLULAR_RESPONSE_TO_DRUG	GO_CELLULAR_RESPONSE_TO_DRUG	57	0.656018	1.66026	0.00605533	0.0502388	0.0395462	678	tags=12%, list=4%, signal=12%	3553/1906/5142/7098/4780/5141/7037	IL1B/EDN1/PDE4B/TLR3/NFE2L2/PDE4A/TFRC
GO_GLUCOSE_IMPORT	GO_GLUCOSE_IMPORT	54	0.663529	1.66706	0.00609171	0.050451	0.0397132	1831	tags=37%, list=12%, signal=33%	6506/7124/6515/4780/151176/3099/6513/79602/114882/10580/8682/83667/55829/5906/6517/5584/51422/388581/5295/6814	SLC1A2/TNF/SLC2A3/NFE2L2/ERFE/HK2/SLC2A1/ADIPOR2/OSBPL8/SORBS1/PEA15/SESN2/SELENOS/RAP1A/SLC2A4/PRKCI/PRKAG2/C1QTNF12/PIK3R1/STXBP3
GO_NEURON_FATE_COMMITMENT	GO_NEURON_FATE_COMMITMENT	25	0.763773	1.70884	0.00610828	0.0504987	0.0397508	753	tags=28%, list=5%, signal=27%	84504/7471/100170841/3714/2624/7046/4851	NKX6-2/WNT1/EPOP/JAG2/GATA2/TGFBR1/NOTCH1
GO_POSITIVE_REGULATION_OF_GLUCOSE_TRANSMEMBRANE_TRANSPORT	GO_POSITIVE_REGULATION_OF_GLUCOSE_TRANSMEMBRANE_TRANSPORT	34	0.723758	1.69881	0.00631461	0.0521122	0.0410209	1757	tags=35%, list=11%, signal=31%	6506/718/8013/4780/151176/79602/114882/10580/5906/5584/388581/5295	SLC1A2/C3/NR4A3/NFE2L2/ERFE/ADIPOR2/OSBPL8/SORBS1/RAP1A/PRKCI/C1QTNF12/PIK3R1
GO_POSITIVE_REGULATION_OF_PROTEIN_MATURATION	GO_POSITIVE_REGULATION_OF_PROTEIN_MATURATION	22	0.7802	1.70912	0.00634852	0.0521999	0.0410899	2273	tags=50%, list=15%, signal=43%	431705/4323/6714/85409/101/10418/4241/2023/7036/4627/2934	ASTL/MMP14/SRC/NKD2/ADAM8/SPON1/MELTF/ENO1/TFR2/MYH9/GSN
GO_PHENOL_CONTAINING_COMPOUND_BIOSYNTHETIC_PROCESS	GO_PHENOL_CONTAINING_COMPOUND_BIOSYNTHETIC_PROCESS	25	0.76231	1.70557	0.00635079	0.0521999	0.0410899	1313	tags=36%, list=9%, signal=33%	9464/23657/3642/2643/9839/4157/7042/9693/7474	HAND2/SLC7A11/INSM1/GCH1/ZEB2/MC1R/TGFB2/RAPGEF2/WNT5A
GO_AMINOGLYCAN_METABOLIC_PROCESS	GO_AMINOGLYCAN_METABOLIC_PROCESS	134	0.55464	1.55051	0.00635875	0.0521999	0.0410899	1377	tags=18%, list=9%, signal=16%	3553/29940/4790/3036/9953/6385/9334/375790/960/9435/57214/56548/50515/8372/22856/6483/6482/54928/6484/10678/7040/1213/138050/1464	IL1B/DSE/NFKB1/HAS1/HS3ST3B1/SDC4/B4GALT5/AGRN/CD44/CHST2/CEMIP/CHST7/CHST11/HYAL3/CHSY1/ST3GAL2/ST3GAL1/BPNT2/ST3GAL4/B3GNT2/TGFB1/CLTC/HGSNAT/CSPG4
GO_LIPID_LOCALIZATION	GO_LIPID_LOCALIZATION	310	0.479789	1.42084	0.00641126	0.0525386	0.0413565	1467	tags=16%, list=10%, signal=15%	3553/29923/366/718/388323/1906/654/7057/4790/7124/23460/151176/10938/5359/56729/80148/6513/3685/1636/4864/80765/80149/80830/2182/124976/5467/11001/10809/114882/6721/9399/6845/4792/3949/4923/2180/4363/134429/81537/5243/23762/5468/8273/123/114897/3783/53349/28232/6696/116150/114883	IL1B/HILPDA/AQP9/C3/GLTPD2/EDN1/BMP6/THBS1/NFKB1/TNF/ABCA6/ERFE/EHD1/PLSCR1/RETN/SLC66A2/SLC2A1/ITGAV/ACE/NPC1/STARD5/ZC3H12A/APOL6/ACSL4/SPNS2/PPARD/SLC27A2/STARD10/OSBPL8/SREBF2/STOML1/VAMP7/NFKBIA/LDLR/NTSR1/ACSL1/ABCC1/STARD4/SGPP1/ABCB1/OSBP2/PPARG/SLC10A3/PLIN2/C1QTNF1/KCNN4/ZFYVE1/SLCO3A1/SPP1/NUS1/OSBPL9
GO_CARTILAGE_DEVELOPMENT	GO_CARTILAGE_DEVELOPMENT	144	0.546549	1.53785	0.00654605	0.0535492	0.042152	2485	tags=27%, list=16%, signal=23%	3696/9464/26585/1906/654/6615/960/7076/50515/7227/8372/22856/7046/54928/6935/650/5447/659/7040/7474/80856/10269/55512/2260/864/2254/861/4856/7483/4094/353500/4088/538/1432/5781/5970/5916/3200/359845	ITGB8/HAND2/GREM1/EDN1/BMP6/SNAI1/CD44/TIMP1/CHST11/TRPS1/HYAL3/CHSY1/TGFBR1/BPNT2/ZEB1/BMP2/POR/BMPR2/TGFB1/WNT5A/LNPK/ZMPSTE24/SMPD3/FGFR1/RUNX3/FGF9/NA/CCN3/WNT9A/MAF/BMP8A/SMAD3/ATP7A/MAPK14/PTPN11/RELA/RARG/HOXA3/RFLNB
GO_POSITIVE_REGULATION_OF_FATTY_ACID_TRANSPORT	GO_POSITIVE_REGULATION_OF_FATTY_ACID_TRANSPORT	15	0.830346	1.70621	0.0065999	0.0538953	0.0424245	304	tags=20%, list=2%, signal=20%	3553/1906/151176	IL1B/EDN1/ERFE
GO_MESENCHYME_DEVELOPMENT	GO_MESENCHYME_DEVELOPMENT	200	0.514008	1.48357	0.00674889	0.0550133	0.0433045	1338	tags=16%, list=9%, signal=14%	3553/9464/26585/1906/7490/6615/5979/10409/8854/8828/80326/6772/23187/200734/6386/8482/9839/7046/23603/4851/10512/650/7042/659/157506/4734/10371/7040/7474/23332/27250	IL1B/HAND2/GREM1/EDN1/WT1/SNAI1/RET/BASP1/ALDH1A2/NRP2/WNT10A/STAT1/PHLDB1/SPRED2/SDCBP/SEMA7A/ZEB2/TGFBR1/CORO1C/NOTCH1/SEMA3C/BMP2/TGFB2/BMPR2/RDH10/NEDD4/SEMA3A/TGFB1/WNT5A/CLASP1/PDCD4
GO_MEMBRANE_PROTEIN_ECTODOMAIN_PROTEOLYSIS	GO_MEMBRANE_PROTEIN_ECTODOMAIN_PROTEOLYSIS	40	0.697972	1.67761	0.00676036	0.0550133	0.0433045	925	tags=25%, list=6%, signal=24%	3553/7124/3586/7133/7076/5657/101/3458/5045/84888	IL1B/TNF/IL10/TNFRSF1B/TIMP1/PRTN3/ADAM8/IFNG/FURIN/SPPL2A
GO_REGULATION_OF_FAT_CELL_DIFFERENTIATION	GO_REGULATION_OF_FAT_CELL_DIFFERENTIATION	108	0.575928	1.57555	0.00680199	0.0552559	0.0434954	1561	tags=19%, list=10%, signal=17%	5743/7471/7124/284207/3638/57761/80149/2624/5467/168455/650/7494/94056/285590/7040/5468/7474/169200/161882/6239	PTGS2/WNT1/TNF/METRNL/INSIG1/TRIB3/ZC3H12A/GATA2/PPARD/CCDC71L/BMP2/XBP1/SYAP1/SH3PXD2B/TGFB1/PPARG/WNT5A/TMEM64/ZFPM1/RREB1
GO_REGULATION_OF_VITAMIN_METABOLIC_PROCESS	GO_REGULATION_OF_VITAMIN_METABOLIC_PROCESS	13	0.845599	1.69575	0.00688947	0.0558693	0.0439783	686	tags=38%, list=4%, signal=37%	3553/6615/4790/7124/3458	IL1B/SNAI1/NFKB1/TNF/IFNG
GO_POSITIVE_REGULATION_OF_SYNAPTIC_TRANSMISSION	GO_POSITIVE_REGULATION_OF_SYNAPTIC_TRANSMISSION	128	0.557069	1.5503	0.00690205	0.0558743	0.0439823	1938	tags=22%, list=13%, signal=19%	5743/6347/6547/3908/7124/4355/56729/4914/5641/10211/2043/760/6780/10769/25/4923/6616/4763/8878/135/9495/8564/22930/5913/6812/54413/10458/51201	PTGS2/CCL2/SLC8A3/LAMA2/TNF/MPP2/RETN/NTRK1/LGMN/FLOT1/EPHA4/CA2/STAU1/PLK2/ABL1/NTSR1/SNAP25/NF1/SQSTM1/ADORA2A/AKAP5/KMO/RAB3GAP1/RAPSN/STXBP1/NLGN3/BAIAP2/ZDHHC2
GO_MESENCHYMAL_CELL_PROLIFERATION	GO_MESENCHYMAL_CELL_PROLIFERATION	25	0.759414	1.69909	0.00695708	0.0562223	0.0442562	1790	tags=36%, list=12%, signal=32%	9464/7422/6772/6935/650/7474/5154/2260/2254	HAND2/VEGFA/STAT1/ZEB1/BMP2/WNT5A/PDGFA/FGFR1/FGF9
GO_STRIATED_MUSCLE_CELL_DIFFERENTIATION	GO_STRIATED_MUSCLE_CELL_DIFFERENTIATION	196	0.515113	1.48491	0.00701268	0.0565738	0.0445329	1618	tags=18%, list=11%, signal=16%	115701/26585/4283/92737/1906/7490/7471/4323/8740/9456/7111/10938/6497/7422/9150/23135/10211/8837/836/4851/9794/650/3688/7494/575/4773/7040/9043/6416/28514/85461/10269/57817/9948/7140	ALPK2/GREM1/CXCL9/DNER/EDN1/WT1/WNT1/MMP14/TNFSF14/HOMER1/TMOD1/EHD1/SKI/VEGFA/CTDP1/KDM6B/FLOT1/CFLAR/CASP3/NOTCH1/MAML1/BMP2/ITGB1/XBP1/ADGRB1/NFATC2/TGFB1/SPAG9/MAP2K4/DLL1/TANC1/ZMPSTE24/HAMP/WDR1/TNNT3
GO_CELLULAR_RESPONSE_TO_STEROID_HORMONE_STIMULUS	GO_CELLULAR_RESPONSE_TO_STEROID_HORMONE_STIMULUS	162	0.532725	1.51412	0.00714222	0.0575195	0.0452773	1854	tags=19%, list=12%, signal=16%	2706/8013/56937/1906/3383/6752/7035/6714/84830/2100/4864/54541/490/5467/29966/2908/8837/11057/57178/2235/4734/5469/8031/112398/10424/476/23558/51366/861/55128	GJB2/NR4A3/PMEPA1/EDN1/ICAM1/SSTR2/TFPI/SRC/ADTRP/ESR2/NPC1/DDIT4/ATP2B1/PPARD/STRN3/NR3C1/CFLAR/ABHD2/ZMIZ1/FECH/NEDD4/MED1/NCOA4/EGLN2/PGRMC2/ATP1A1/WBP2/UBR5/NA/TRIM68
GO_LENS_DEVELOPMENT_IN_CAMERA_TYPE_EYE	GO_LENS_DEVELOPMENT_IN_CAMERA_TYPE_EYE	52	0.662451	1.65538	0.007165	0.0575983	0.0453393	1413	tags=25%, list=9%, signal=23%	23657/8412/7111/25945/6497/6498/200734/9839/7046/23424/7431/7474/5469	SLC7A11/NA/TMOD1/NECTIN3/SKI/SKIL/SPRED2/ZEB2/TGFBR1/TDRD7/VIM/WNT5A/MED1
GO_T_HELPER_17_TYPE_IMMUNE_RESPONSE	GO_T_HELPER_17_TYPE_IMMUNE_RESPONSE	24	0.76444	1.69864	0.00717667	0.0575983	0.0453393	1124	tags=33%, list=7%, signal=31%	51561/114548/10538/80149/10892/6774/64332/54542	IL23A/NLRP3/BATF/ZC3H12A/MALT1/STAT3/NFKBIZ/RC3H2
GO_MUSCLE_ADAPTATION	GO_MUSCLE_ADAPTATION	77	0.612131	1.6103	0.0071956	0.0576465	0.0453772	753	tags=10%, list=5%, signal=10%	3553/9464/8013/1906/7133/9150/8837/4851	IL1B/HAND2/NR4A3/EDN1/TNFRSF1B/CTDP1/CFLAR/NOTCH1
GO_REGULATION_OF_METANEPHROS_DEVELOPMENT	GO_REGULATION_OF_METANEPHROS_DEVELOPMENT	15	0.827964	1.70131	0.00720736	0.0576465	0.0453772	463	tags=33%, list=3%, signal=32%	7490/5979/10409/6772/3976	WT1/RET/BASP1/STAT1/LIF
GO_INNATE_IMMUNE_RESPONSE_IN_MUCOSA	GO_INNATE_IMMUNE_RESPONSE_IN_MUCOSA	12	0.85323	1.68956	0.00724415	0.0578418	0.045531	651	tags=25%, list=4%, signal=24%	6037/820/6036	RNASE3/CAMP/RNASE2
GO_REGULATION_OF_LIPID_STORAGE	GO_REGULATION_OF_LIPID_STORAGE	43	0.686929	1.66983	0.00731697	0.0583235	0.0459102	1308	tags=30%, list=9%, signal=28%	29923/718/4790/7124/10938/3685/80149/5467/114882/6721/4792/5468/123	HILPDA/C3/NFKB1/TNF/EHD1/ITGAV/ZC3H12A/PPARD/OSBPL8/SREBF2/NFKBIA/PPARG/PLIN2
GO_CELLULAR_RESPONSE_TO_DEXAMETHASONE_STIMULUS	GO_CELLULAR_RESPONSE_TO_DEXAMETHASONE_STIMULUS	25	0.758033	1.696	0.00738147	0.0587374	0.046236	986	tags=24%, list=6%, signal=22%	2706/3383/54541/2908/8837/2235	GJB2/ICAM1/DDIT4/NR3C1/CFLAR/FECH
GO_REGULATION_OF_PROTEIN_SERINE_THREONINE_KINASE_ACTIVITY	GO_REGULATION_OF_PROTEIN_SERINE_THREONINE_KINASE_ACTIVITY	445	0.452576	1.35724	0.00741834	0.0589304	0.0463878	1767	tags=20%, list=12%, signal=18%	3553/23566/3656/80824/6547/2321/1906/1846/1991/7057/7124/5979/595/151/6714/5291/57761/7422/7128/1326/1844/136/57214/4914/200734/51776/9839/101/9175/3458/57521/836/7046/7251/1398/5770/2043/5610/25994/8900/5716/51191/2081/23118/2889/650/257397/8682/151195/83667/7855/94056/7532/25/54900/5063/2180/4763/9693/7040/5570/324/9043/6416/23533/5663/7474/27250/10125/1464/7186/3654/5571/11072/5795/11142/56034…	IL1B/LPAR3/IRAK2/DUSP16/SLC8A3/FLT1/EDN1/DUSP4/ELANE/THBS1/TNF/RET/CCND1/ADRA2B/SRC/PIK3CB/TRIB3/VEGFA/TNFAIP3/MAP3K8/DUSP2/ADORA2B/CEMIP/NTRK1/SPRED2/MAP3K20/ZEB2/ADAM8/MAP3K13/IFNG/RPTOR/CASP3/TGFBR1/TSG101/CRK/PTPN1/EPHA4/EIF2AK2/HIGD1A/CCNA1/PSMD10/HERC5/ERN1/TAB2/RAPGEF1/BMP2/TAB3/PEA15/CCNYL1/SESN2/FZD5/SYAP1/YWHAG/ABL1/LAX1/PAK3/ACSL1/NF1/RAPGEF2/TGFB1/PKIB/APC/SPAG9/MAP2K4/PIK3R5/PSEN1/WN…
GO_POSITIVE_REGULATION_OF_CALCIUM_ION_TRANSPORT	GO_POSITIVE_REGULATION_OF_CALCIUM_ION_TRANSPORT	91	0.591435	1.5882	0.00747288	0.0592628	0.0466495	589	tags=11%, list=4%, signal=11%	6348/6351/23566/5031/4283/6347/9456/57214/490/9446	CCL3/CCL4/LPAR3/P2RY6/CXCL9/CCL2/HOMER1/CEMIP/ATP2B1/GSTO1
GO_POSITIVE_REGULATION_OF_SYNAPTIC_TRANSMISSION_GLUTAMATERGIC	GO_POSITIVE_REGULATION_OF_SYNAPTIC_TRANSMISSION_GLUTAMATERGIC	21	0.781661	1.70082	0.00750381	0.059328	0.0467009	1817	tags=38%, list=12%, signal=34%	5743/6347/4914/135/8564/22930/6812/54413	PTGS2/CCL2/NTRK1/ADORA2A/KMO/RAB3GAP1/STXBP1/NLGN3
GO_SYNAPTIC_TRANSMISSION_GLUTAMATERGIC	GO_SYNAPTIC_TRANSMISSION_GLUTAMATERGIC	57	0.649398	1.6435	0.0075065	0.059328	0.0467009	1817	tags=28%, list=12%, signal=25%	5743/6347/7124/9456/4914/8775/6509/127262/4763/5663/84896/135/8564/22930/6812/54413	PTGS2/CCL2/TNF/HOMER1/NTRK1/NAPA/SLC1A4/TPRG1L/NF1/PSEN1/ATAD1/ADORA2A/KMO/RAB3GAP1/STXBP1/NLGN3
GO_REGULATION_OF_OXIDATIVE_STRESS_INDUCED_CELL_DEATH	GO_REGULATION_OF_OXIDATIVE_STRESS_INDUCED_CELL_DEATH	58	0.647144	1.64162	0.0075925	0.0599064	0.0471562	693	tags=14%, list=5%, signal=13%	23657/6648/8013/7471/3586/4780/135112/5034	SLC7A11/SOD2/NR4A3/WNT1/IL10/NFE2L2/NCOA7/P4HB
GO_RESPONSE_TO_COPPER_ION	GO_RESPONSE_TO_COPPER_ION	30	0.732339	1.6851	0.00776713	0.0611809	0.0481594	300	tags=10%, list=2%, signal=10%	3552/3383/4780	IL1A/ICAM1/NFE2L2
GO_RESPONSE_TO_ENDOPLASMIC_RETICULUM_STRESS	GO_RESPONSE_TO_ENDOPLASMIC_RETICULUM_STRESS	266	0.487126	1.43093	0.00779939	0.0613316	0.048278	2231	tags=28%, list=15%, signal=25%	3576/6347/7057/4780/595/57761/116496/30001/1491/5371/57003/29982/10211/11153/5034/58515/5770/258010/2907/5610/57414/6400/2081/55298/9024/7706/27248/83667/55829/7494/7184/160418/7009/64714/10955/4189/26270/22926/837/2923/3300/9097/5516/7186/3093/55033/9919/10952/23645/8795/1965/4779/6745/79094/9695/23071/64224/5295/80700/118424/51283/1861/56005/9570/81542/6734/821/23376/27230/81502/54499/55161/550…	CXCL8/CCL2/THBS1/NFE2L2/CCND1/TRIB3/NIBAN1/ERO1A/CTH/PML/CCDC47/NRBF2/FLOT1/FICD/P4HB/SELENOK/PTPN1/SVIP/GRINA/EIF2AK2/RHBDD2/SEL1L/ERN1/RNF121/BRSK2/TRIM25/ERLEC1/SESN2/SELENOS/XBP1/HSP90B1/TMTC3/TMBIM6/PDIA2/SERINC3/DNAJB9/FBXO6/ATF6/CASP4/PDIA3/DNAJB2/USP14/PPP2CB/TRAF2/UBE2K/FKBP14/SEC16A/SEC61B/PPP1R15A/TNFRSF10B/EIF2S1/NFE2L1/SSR1/CHAC1/EDEM1/ERP44/HERPUD2/PIK3R1/UBXN6/UBE2J2/BFAR/TOR1A/MYD…
GO_SEQUESTERING_OF_TRIGLYCERIDE	GO_SEQUESTERING_OF_TRIGLYCERIDE	15	0.824842	1.6949	0.00781481	0.0613495	0.0482921	1308	tags=33%, list=9%, signal=31%	3553/7124/114882/5468/123	IL1B/TNF/OSBPL8/PPARG/PLIN2
GO_NEGATIVE_REGULATION_OF_ION_TRANSPORT	GO_NEGATIVE_REGULATION_OF_ION_TRANSPORT	104	0.574997	1.56762	0.00786058	0.0616054	0.0484935	1201	tags=15%, list=8%, signal=14%	5743/255057/2669/3383/7057/285966/1193/9943/9446/6536/124935/10105/4923/7009/4734/23327	PTGS2/CBARP/GEM/ICAM1/THBS1/TCAF2/CLIC2/OXSR1/GSTO1/SLC6A9/SLC43A2/PPIF/NTSR1/TMBIM6/NEDD4/NEDD4L
GO_RECEPTOR_SIGNALING_PATHWAY_VIA_STAT	GO_RECEPTOR_SIGNALING_PATHWAY_VIA_STAT	106	0.572562	1.56353	0.00790185	0.061825	0.0486664	1009	tags=17%, list=7%, signal=16%	64109/6347/51561/8651/6775/7124/5979/3586/6772/8784/3976/83666/3458/9111/6774/4851/84444/9021	CRLF2/CCL2/IL23A/SOCS1/STAT4/TNF/RET/IL10/STAT1/TNFRSF18/LIF/PARP9/IFNG/NMI/STAT3/NOTCH1/DOT1L/SOCS3
GO_ENDOTHELIAL_CELL_DEVELOPMENT	GO_ENDOTHELIAL_CELL_DEVELOPMENT	55	0.652522	1.64359	0.00791785	0.0618365	0.0486755	2440	tags=33%, list=16%, signal=28%	3553/3383/7124/7422/5144/2889/50848/5906/26051/9693/5908/25932/57493/5624/2194/5138/9294/2150	IL1B/ICAM1/TNF/VEGFA/PDE4D/RAPGEF1/F11R/RAP1A/PPP1R16B/RAPGEF2/RAP1B/CLIC4/HEG1/PROC/FASN/PDE2A/S1PR2/F2RL1
GO_POSITIVE_REGULATION_OF_T_CELL_CYTOKINE_PRODUCTION	GO_POSITIVE_REGULATION_OF_T_CELL_CYTOKINE_PRODUCTION	18	0.800837	1.69755	0.0079298	0.0618365	0.0486755	1379	tags=39%, list=9%, signal=35%	3553/3554/114548/10892/7855/3105/7186	IL1B/IL1R1/NLRP3/MALT1/FZD5/HLA-A/TRAF2
GO_GLIAL_CELL_PROLIFERATION	GO_GLIAL_CELL_PROLIFERATION	36	0.707339	1.67348	0.00796949	0.0620425	0.0488376	1269	tags=19%, list=8%, signal=18%	3553/1435/7124/6497/4851/4049/5584	IL1B/CSF1/TNF/SKI/NOTCH1/LTA/PRKCI
GO_ENDOCYTOSIS	GO_ENDOCYTOSIS	465	0.448919	1.34788	0.00800195	0.0621915	0.0489549	2299	tags=23%, list=15%, signal=20%	4973/3576/54453/26585/718/92737/10203/84251/1514/7057/4599/29967/4600/6860/10938/6714/5291/8877/7422/57007/4864/9322/115123/558/2624/6386/27/10211/7037/9711/23011/9829/7251/5770/8871/55681/3577/8650/30844/8301/5868/163486/2358/8578/6845/3688/7184/25/3949/43/575/6517/6616/4734/1455/23327/4043/11252/977/1213/5468/28514/7474/9765/23431/51606/57403/84896/7879/5168/6455/23048/29887/3958/9260/967/81/11…	OLR1/CXCL8/RIN2/GREM1/C3/DNER/CALCRL/SGIP1/CTSL/THBS1/MX1/LRP12/MX2/SYT4/EHD1/SRC/PIK3CB/SPHK1/VEGFA/ACKR3/NPC1/TRIP10/MARCHF3/AXL/GATA2/SDCBP/ABL2/FLOT1/TFRC/RUBCN/RAB21/DNAJC6/TSG101/PTPN1/SYNJ2/SCYL2/CXCR1/NUMB/EHD4/PICALM/RAB5A/DENND1B/FPR2/SCARF1/VAMP7/ITGB1/HSP90B1/ABL1/LDLR/ACHE/ADGRB1/SLC2A4/SNAP25/NEDD4/CSNK1G2/NEDD4L/LRPAP1/PACSIN2/CD151/CLTC/PPARG/DLL1/WNT5A/ZFYVE16/AP4E1/ATP6V1H/RAB22…
GO_INTERFERON_ALPHA_PRODUCTION	GO_INTERFERON_ALPHA_PRODUCTION	25	0.755527	1.69039	0.00806354	0.0625646	0.0492486	733	tags=32%, list=5%, signal=31%	64135/7098/3586/84868/23586/6772/3665/64343	IFIH1/TLR3/IL10/HAVCR2/DDX58/STAT1/IRF7/AZI2
GO_REGULATION_OF_EPITHELIAL_TO_MESENCHYMAL_TRANSITION	GO_REGULATION_OF_EPITHELIAL_TO_MESENCHYMAL_TRANSITION	77	0.608935	1.6019	0.0080872	0.0625646	0.0492486	1332	tags=16%, list=9%, signal=14%	3553/26585/6615/23187/200734/6386/7046/4851/650/7042/7040/23332	IL1B/GREM1/SNAI1/PHLDB1/SPRED2/SDCBP/TGFBR1/NOTCH1/BMP2/TGFB2/TGFB1/CLASP1
GO_PERK_MEDIATED_UNFOLDED_PROTEIN_RESPONSE	GO_PERK_MEDIATED_UNFOLDED_PROTEIN_RESPONSE	19	0.792849	1.69581	0.00809013	0.0625646	0.0492486	1541	tags=32%, list=10%, signal=28%	3576/6347/4780/5770/23645/1965	CXCL8/CCL2/NFE2L2/PTPN1/PPP1R15A/EIF2S1
GO_EXTRACELLULAR_MATRIX_DISASSEMBLY	GO_EXTRACELLULAR_MATRIX_DISASSEMBLY	58	0.645335	1.63702	0.00811885	0.0626829	0.0493417	1332	tags=26%, list=9%, signal=24%	4327/1511/1991/1514/4323/960/7076/10211/101/5045/682/285590/7040/4241/23332	MMP19/CTSG/ELANE/CTSL/MMP14/CD44/TIMP1/FLOT1/ADAM8/FURIN/BSG/SH3PXD2B/TGFB1/MELTF/CLASP1
GO_PROGRAMMED_NECROTIC_CELL_DEATH	GO_PROGRAMMED_NECROTIC_CELL_DEATH	40	0.691999	1.66326	0.00813487	0.0627029	0.0493575	1379	tags=30%, list=9%, signal=27%	356/7124/7098/330/329/355/148022/8837/10105/253430/8772/7186	FASLG/TNF/TLR3/BIRC3/BIRC2/FAS/TICAM1/CFLAR/PPIF/IPMK/FADD/TRAF2
GO_DEFENSE_RESPONSE_TO_GRAM_POSITIVE_BACTERIUM	GO_DEFENSE_RESPONSE_TO_GRAM_POSITIVE_BACTERIUM	56	0.649688	1.64092	0.00816256	0.0628127	0.0494439	1483	tags=23%, list=10%, signal=21%	6037/1511/114548/7124/84868/115361/2634/944/820/4049/4615/3105/3140	RNASE3/CTSG/NLRP3/TNF/HAVCR2/GBP4/GBP2/TNFSF8/CAMP/LTA/MYD88/HLA-A/MR1
GO_INFLAMMATORY_RESPONSE_TO_WOUNDING	GO_INFLAMMATORY_RESPONSE_TO_WOUNDING	13	0.839839	1.68421	0.00825388	0.063411	0.0499148	444	tags=15%, list=3%, signal=15%	3552/7076	IL1A/TIMP1
GO_NEGATIVE_REGULATION_OF_TYPE_I_INTERFERON_PRODUCTION	GO_NEGATIVE_REGULATION_OF_TYPE_I_INTERFERON_PRODUCTION	44	0.679807	1.65789	0.00828043	0.0635105	0.0499932	1210	tags=32%, list=8%, signal=29%	9636/64135/3586/84868/23586/79132/7128/5966/9111/51191/7706/5971/54476/8887	ISG15/IFIH1/IL10/HAVCR2/DDX58/DHX58/TNFAIP3/REL/NMI/HERC5/TRIM25/RELB/RNF216/TAX1BP1
GO_NEGATIVE_REGULATION_OF_T_CELL_PROLIFERATION	GO_NEGATIVE_REGULATION_OF_T_CELL_PROLIFERATION	52	0.657908	1.64402	0.00834574	0.063853	0.0502628	784	tags=17%, list=5%, signal=16%	3559/29126/384/941/3586/6385/84868/836/57045	IL2RA/CD274/ARG2/CD80/IL10/SDC4/HAVCR2/CASP3/TWSG1
GO_RESPONSE_TO_ACIDIC_PH	GO_RESPONSE_TO_ACIDIC_PH	16	0.815424	1.69405	0.00835243	0.063853	0.0502628	606	tags=19%, list=4%, signal=18%	2853/6714/5641	GPR31/SRC/LGMN
GO_ACTIVATION_OF_CYSTEINE_TYPE_ENDOPEPTIDASE_ACTIVITY_INVOLVED_IN_APOPTOTIC_PROCESS	GO_ACTIVATION_OF_CYSTEINE_TYPE_ENDOPEPTIDASE_ACTIVITY_INVOLVED_IN_APOPTOTIC_PROCESS	76	0.609062	1.59975	0.00837968	0.0639567	0.0503444	1462	tags=24%, list=10%, signal=22%	2152/112399/356/114548/7124/355/26355/8743/637/5371/23786/8837/9966/5468/8772/7186/29843/8795	F3/EGLN3/FASLG/NLRP3/TNF/FAS/FAM162A/TNFSF10/BID/PML/BCL2L13/CFLAR/TNFSF15/PPARG/FADD/TRAF2/SENP1/TNFRSF10B
GO_RESPONSE_TO_INTERLEUKIN_12	GO_RESPONSE_TO_INTERLEUKIN_12	46	0.673544	1.65378	0.00841486	0.0640203	0.0503944	693	tags=17%, list=5%, signal=17%	5055/6648/6775/3586/5898/9446/3458/5034	SERPINB2/SOD2/STAT4/IL10/RALA/GSTO1/IFNG/P4HB
GO_CELL_FATE_SPECIFICATION	GO_CELL_FATE_SPECIFICATION	39	0.694179	1.66298	0.00841542	0.0640203	0.0503944	1906	tags=26%, list=12%, signal=23%	84504/4851/3688/324/28514/5663/7474/2260/3516/440823	NKX6-2/NOTCH1/ITGB1/APC/DLL1/PSEN1/WNT5A/FGFR1/RBPJ/MIAT
GO_MESONEPHRIC_TUBULE_MORPHOGENESIS	GO_MESONEPHRIC_TUBULE_MORPHOGENESIS	38	0.697797	1.66448	0.00858606	0.0652122	0.0513327	1059	tags=16%, list=7%, signal=15%	26585/7490/7471/7422/650/84445	GREM1/WT1/WNT1/VEGFA/BMP2/LZTS2
GO_PROTEIN_PROCESSING	GO_PROTEIN_PROCESSING	164	0.526842	1.49867	0.00863753	0.0654034	0.0514832	1549	tags=20%, list=10%, signal=18%	2152/431705/8530/1511/1514/7057/5552/4323/5328/6714/330/329/64065/1889/1636/5230/85409/5641/101/5045/836/10418/3428/84301/90701/4241/2023/5663/8772/444/10269/51098	F3/ASTL/CST7/CTSG/CTSL/THBS1/SRGN/MMP14/PLAU/SRC/BIRC3/BIRC2/PERP/ECE1/ACE/PGK1/NKD2/LGMN/ADAM8/FURIN/CASP3/SPON1/IFI16/DDI2/SEC11C/MELTF/ENO1/PSEN1/FADD/ASPH/ZMPSTE24/IFT52
GO_NEGATIVE_REGULATION_OF_ALPHA_BETA_T_CELL_ACTIVATION	GO_NEGATIVE_REGULATION_OF_ALPHA_BETA_T_CELL_ACTIVATION	35	0.708082	1.6686	0.00863925	0.0654034	0.0514832	2423	tags=37%, list=16%, signal=31%	29126/384/8651/80149/57045/54542/135/864/861/3566/3718/7292/301	CD274/ARG2/SOCS1/ZC3H12A/TWSG1/RC3H2/ADORA2A/RUNX3/NA/IL4R/JAK3/TNFSF4/ANXA1
GO_REGULATION_OF_GLIAL_CELL_DIFFERENTIATION	GO_REGULATION_OF_GLIAL_CELL_DIFFERENTIATION	50	0.662376	1.64575	0.00868285	0.0656272	0.0516594	1253	tags=20%, list=8%, signal=18%	84504/7133/3976/4851/2043/650/3949/4763/7040/5468	NKX6-2/TNFRSF1B/LIF/NOTCH1/EPHA4/BMP2/LDLR/NF1/TGFB1/PPARG
GO_REGULATION_OF_MICROGLIAL_CELL_ACTIVATION	GO_REGULATION_OF_MICROGLIAL_CELL_ACTIVATION	14	0.830373	1.68607	0.00873399	0.065907	0.0518796	359	tags=21%, list=2%, signal=21%	6348/8530/8877	CCL3/CST7/SPHK1
GO_REGULATION_OF_T_CELL_MIGRATION	GO_REGULATION_OF_T_CELL_MIGRATION	37	0.699366	1.66106	0.00886202	0.0667243	0.052523	1321	tags=22%, list=9%, signal=20%	6364/8740/9943/101/58515/1398/7474/8772	CCL20/TNFSF14/OXSR1/ADAM8/SELENOK/CRK/WNT5A/FADD
GO_MUSCLE_CELL_DIFFERENTIATION	GO_MUSCLE_CELL_DIFFERENTIATION	265	0.484682	1.4234	0.00888908	0.0667243	0.052523	2507	tags=25%, list=16%, signal=21%	115701/26585/2069/6648/4283/92737/1906/7490/7471/4323/8740/9456/7111/10938/6497/7422/9150/23135/1491/10211/8837/836/4851/6830/9794/6935/650/9444/3688/7494/25/575/4772/4773/7040/9043/6416/28514/27250/85461/10269/57817/9948/7140/3516/2254/4856/54910/3566/3398/9643/3815/64855/3845/6095/57538/4204/4627/4000/1495/1432/26057/2274/10939/7504	ALPK2/GREM1/EREG/SOD2/CXCL9/DNER/EDN1/WT1/WNT1/MMP14/TNFSF14/HOMER1/TMOD1/EHD1/SKI/VEGFA/CTDP1/KDM6B/CTH/FLOT1/CFLAR/CASP3/NOTCH1/SUPT6H/MAML1/ZEB1/BMP2/QKI/ITGB1/XBP1/ABL1/ADGRB1/NFATC1/NFATC2/TGFB1/SPAG9/MAP2K4/DLL1/PDCD4/TANC1/ZMPSTE24/HAMP/WDR1/TNNT3/RBPJ/FGF9/CCN3/SEMA4C/IL4R/ID2/MORF4L2/KIT/NIBAN2/KRAS/RORA/ALPK3/MECP2/MYH9/LMNA/CTNNA1/MAPK14/ANKRD17/FHL2/AFG3L2/XK
GO_DORSAL_VENTRAL_PATTERN_FORMATION	GO_DORSAL_VENTRAL_PATTERN_FORMATION	50	0.661435	1.64341	0.00889891	0.0667243	0.052523	542	tags=8%, list=4%, signal=8%	84504/26585/1906/4681	NKX6-2/GREM1/EDN1/NA
GO_POSITIVE_REGULATION_OF_GLIAL_CELL_MIGRATION	GO_POSITIVE_REGULATION_OF_GLIAL_CELL_MIGRATION	10	0.866381	1.66758	0.00889944	0.0667243	0.052523	224	tags=20%, list=1%, signal=20%	6348/1435	CCL3/CSF1
GO_UNSATURATED_FATTY_ACID_METABOLIC_PROCESS	GO_UNSATURATED_FATTY_ACID_METABOLIC_PROCESS	85	0.593635	1.58054	0.00899611	0.0673096	0.0529837	669	tags=9%, list=4%, signal=9%	3553/5743/1906/79993/241/551/8560/11343	IL1B/PTGS2/EDN1/ELOVL7/ALOX5AP/AVP/DEGS1/MGLL
GO_OSTEOBLAST_DIFFERENTIATION	GO_OSTEOBLAST_DIFFERENTIATION	172	0.519998	1.48468	0.00900631	0.0673096	0.0529837	2570	tags=24%, list=17%, signal=21%	9464/6348/26585/654/6615/7124/6497/57003/8482/4851/57045/103/650/3183/659/43/6238/285590/4763/1213/92/249/169200/6696/1192/9260/23601/5747/3376/8519/2254/3398/7171/23376/2194/847/4088/2274/9770/6096/4077/338773	HAND2/CCL3/GREM1/BMP6/SNAI1/TNF/SKI/CCDC47/SEMA7A/NOTCH1/TWSG1/ADAR/BMP2/HNRNPC/BMPR2/ACHE/RRBP1/SH3PXD2B/NF1/CLTC/ACVR2A/ALPL/TMEM64/SPP1/CLIC1/PDLIM7/CLEC5A/PTK2/IARS1/IFITM1/FGF9/ID2/TPM4/UFL1/FASN/CAT/SMAD3/FHL2/RASSF2/RORB/NBR1/TMEM119
GO_MAINTENANCE_OF_SYNAPSE_STRUCTURE	GO_MAINTENANCE_OF_SYNAPSE_STRUCTURE	12	-0.755936	-1.73205	0.00909663	0.0678474	0.053407	2401	tags=67%, list=16%, signal=56%	1741/1739/1639/1740/8831/4983/400916/5864	DLG3/DLG1/DCTN1/DLG2/SYNGAP1/OPHN1/CHCHD10/RAB3A
GO_NEGATIVE_REGULATION_OF_INTERLEUKIN_1_PRODUCTION	GO_NEGATIVE_REGULATION_OF_INTERLEUKIN_1_PRODUCTION	21	0.77518	1.68672	0.00910733	0.0678474	0.053407	609	tags=24%, list=4%, signal=23%	114548/3586/7128/80149/1992	NLRP3/IL10/TNFAIP3/ZC3H12A/SERPINB1
GO_NEGATIVE_REGULATION_OF_CALCIUM_ION_TRANSPORT	GO_NEGATIVE_REGULATION_OF_CALCIUM_ION_TRANSPORT	39	0.69147	1.65649	0.00916127	0.0681406	0.0536378	1169	tags=21%, list=8%, signal=19%	5743/255057/2669/3383/1193/9446/4923/7009	PTGS2/CBARP/GEM/ICAM1/CLIC2/GSTO1/NTSR1/TMBIM6
GO_CATECHOLAMINE_BIOSYNTHETIC_PROCESS	GO_CATECHOLAMINE_BIOSYNTHETIC_PROCESS	12	0.845458	1.67417	0.00918729	0.0681797	0.0536686	1011	tags=33%, list=7%, signal=31%	9464/3642/2643/7042	HAND2/INSM1/GCH1/TGFB2
GO_POSITIVE_REGULATION_OF_INTERLEUKIN_4_PRODUCTION	GO_POSITIVE_REGULATION_OF_INTERLEUKIN_4_PRODUCTION	23	0.76158	1.68187	0.00919572	0.0681797	0.0536686	312	tags=17%, list=2%, signal=17%	8288/8140/114548/84868	EPX/SLC7A5/NLRP3/HAVCR2
GO_NEGATIVE_REGULATION_OF_BONE_MINERALIZATION	GO_NEGATIVE_REGULATION_OF_BONE_MINERALIZATION	14	0.828284	1.68183	0.00921644	0.068225	0.0537043	234	tags=21%, list=2%, signal=21%	6348/26585/5552	CCL3/GREM1/SRGN
GO_ADHERENS_JUNCTION_ORGANIZATION	GO_ADHERENS_JUNCTION_ORGANIZATION	51	0.657305	1.63766	0.00923383	0.0682456	0.0537205	899	tags=18%, list=6%, signal=17%	654/3801/11228/25945/6714/7422/1500/2043/8650	BMP6/KIFC3/RASSF8/NECTIN3/SRC/VEGFA/CTNND1/EPHA4/NUMB
GO_NEGATIVE_REGULATION_OF_EXTRINSIC_APOPTOTIC_SIGNALING_PATHWAY_VIA_DEATH_DOMAIN_RECEPTORS	GO_NEGATIVE_REGULATION_OF_EXTRINSIC_APOPTOTIC_SIGNALING_PATHWAY_VIA_DEATH_DOMAIN_RECEPTORS	33	0.712525	1.66519	0.00925295	0.0682789	0.0537466	1462	tags=36%, list=10%, signal=33%	356/3383/355/7128/8743/117584/8837/64114/8682/8772/7186/8795	FASLG/ICAM1/FAS/TNFAIP3/TNFSF10/RFFL/CFLAR/TMBIM1/PEA15/FADD/TRAF2/TNFRSF10B
GO_REGULATION_OF_ENDOCYTOSIS	GO_REGULATION_OF_ENDOCYTOSIS	166	0.523253	1.48993	0.00931383	0.0686197	0.054015	2092	tags=28%, list=14%, signal=25%	26585/718/84251/6860/6714/5291/8877/7422/558/2624/6386/27/10211/9711/23011/9829/7251/5770/55681/8650/30844/8301/5868/25/6517/23327/4043/11252/977/5468/28514/7474/9765/84896/6455/3958/967/81/341/79772/1861/11031/114781/163/7036/4289/54806	GREM1/C3/SGIP1/SYT4/SRC/PIK3CB/SPHK1/VEGFA/AXL/GATA2/SDCBP/ABL2/FLOT1/RUBCN/RAB21/DNAJC6/TSG101/PTPN1/SCYL2/NUMB/EHD4/PICALM/RAB5A/ABL1/SLC2A4/NEDD4L/LRPAP1/PACSIN2/CD151/PPARG/DLL1/WNT5A/ZFYVE16/ATAD1/SH3GL1/LGALS3/CD63/ACTN4/APOC1/MCTP1/TOR1A/RAB31/BTBD9/AP2B1/TFR2/MKLN1/AHI1
GO_ARTERY_MORPHOGENESIS	GO_ARTERY_MORPHOGENESIS	43	0.678881	1.65026	0.00936794	0.0689097	0.0542432	1195	tags=23%, list=8%, signal=22%	9464/639/7422/7046/4851/57178/7042/659/3949/4763	HAND2/PRDM1/VEGFA/TGFBR1/NOTCH1/ZMIZ1/TGFB2/BMPR2/LDLR/NF1
GO_CARDIOCYTE_DIFFERENTIATION	GO_CARDIOCYTE_DIFFERENTIATION	96	0.578981	1.56421	0.00942632	0.0692301	0.0544954	1536	tags=22%, list=10%, signal=20%	9464/115701/26585/1906/7490/7422/9150/23135/4851/10512/9794/650/7042/3688/7040/6416/28514/27250/10269/7049/57817	HAND2/ALPK2/GREM1/EDN1/WT1/VEGFA/CTDP1/KDM6B/NOTCH1/SEMA3C/MAML1/BMP2/TGFB2/ITGB1/TGFB1/MAP2K4/DLL1/PDCD4/ZMPSTE24/TGFBR3/HAMP
GO_VASCULAR_WOUND_HEALING	GO_VASCULAR_WOUND_HEALING	14	0.827264	1.67976	0.00946598	0.0694122	0.0546388	1078	tags=43%, list=7%, signal=40%	7124/7422/7128/2624/79602/7494	TNF/VEGFA/TNFAIP3/GATA2/ADIPOR2/XBP1
GO_OUTER_DYNEIN_ARM_ASSEMBLY	GO_OUTER_DYNEIN_ARM_ASSEMBLY	11	0.85478	1.67013	0.00949607	0.0694191	0.0546442	372	tags=27%, list=2%, signal=27%	8632/123872/83538	DNAH17/DNAAF1/TTC25
GO_REGULATION_OF_NERVOUS_SYSTEM_PROCESS	GO_REGULATION_OF_NERVOUS_SYSTEM_PROCESS	107	0.567036	1.54995	0.00949664	0.0694191	0.0546442	669	tags=10%, list=4%, signal=10%	6348/400746/6547/8530/1906/3586/9456/6714/7133/551/11343	CCL3/NCMAP/SLC8A3/CST7/EDN1/IL10/HOMER1/SRC/TNFRSF1B/AVP/MGLL
GO_REGULATION_OF_OSTEOCLAST_DIFFERENTIATION	GO_REGULATION_OF_OSTEOCLAST_DIFFERENTIATION	53	0.651204	1.63198	0.00952737	0.069481	0.0546929	1397	tags=23%, list=9%, signal=21%	6348/51561/1435/7124/7098/8111/3458/7107/760/4763/4853/169200	CCL3/IL23A/CSF1/TNF/TLR3/GPR68/IFNG/GPR137B/CA2/NF1/NOTCH2/TMEM64
GO_POSITIVE_REGULATION_OF_LIPID_CATABOLIC_PROCESS	GO_POSITIVE_REGULATION_OF_LIPID_CATABOLIC_PROCESS	17	0.802173	1.68333	0.00953485	0.069481	0.0546929	4	tags=6%, list=0%, signal=6%	3553	IL1B
GO_MORPHOGENESIS_OF_A_BRANCHING_STRUCTURE	GO_MORPHOGENESIS_OF_A_BRANCHING_STRUCTURE	134	0.543462	1.51926	0.00957256	0.0696471	0.0548237	1791	tags=22%, list=12%, signal=19%	26585/1906/7490/7471/1435/7124/4323/441478/3586/6714/639/7422/5371/9175/4851/10512/650/9021/7855/25/157506/10371/7474/5469/25932/5154/2260/7421/4070	GREM1/EDN1/WT1/WNT1/CSF1/TNF/MMP14/NRARP/IL10/SRC/PRDM1/VEGFA/PML/MAP3K13/NOTCH1/SEMA3C/BMP2/SOCS3/FZD5/ABL1/RDH10/SEMA3A/WNT5A/MED1/CLIC4/PDGFA/FGFR1/VDR/TACSTD2
GO_NEURON_APOPTOTIC_PROCESS	GO_NEURON_APOPTOTIC_PROCESS	192	0.509587	1.46661	0.0095955	0.0697054	0.0548696	1814	tags=18%, list=12%, signal=16%	6348/6648/8013/6347/112399/356/664/7124/3586/355/26355/4914/637/558/5641/101/836/2729/80331/7042/55626/5063/2597/4763/6416/5584/5663/8772/135/997/112398/10314/5913/55532/6812	CCL3/SOD2/NR4A3/CCL2/EGLN3/FASLG/BNIP3/TNF/IL10/FAS/FAM162A/NTRK1/BID/AXL/LGMN/ADAM8/CASP3/GCLC/DNAJC5/TGFB2/AMBRA1/PAK3/GAPDH/NF1/MAP2K4/PRKCI/PSEN1/FADD/ADORA2A/CDC34/EGLN2/LANCL1/RAPSN/SLC30A10/STXBP1
GO_REGULATION_OF_CILIUM_ASSEMBLY	GO_REGULATION_OF_CILIUM_ASSEMBLY	47	-0.529543	-1.63416	0.00964136	0.0699104	0.0550309	1983	tags=28%, list=13%, signal=24%	23224/79874/4134/8814/80199/84260/51364/10801/8558/79598/79734/9742/9696	SYNE2/RABEP2/MAP4/CDKL1/FUZ/TCHP/ZMYND10/SEPTIN9/CDK10/CEP97/KCTD17/IFT140/CROCC
GO_REGULATION_OF_POSTSYNAPSE_ORGANIZATION	GO_REGULATION_OF_POSTSYNAPSE_ORGANIZATION	90	0.58455	1.56779	0.00965977	0.0699104	0.0550309	2381	tags=31%, list=16%, signal=26%	2596/23657/58489/547/5552/9456/8828/26037/378/54583/26115/2043/5063/91752/7474/5048/816/5913/54413/10458/51201/25978/2534/170506/729956/54434/81926/7337	GAP43/SLC7A11/ABHD17C/KIF1A/SRGN/HOMER1/NRP2/SIPA1L1/ARF4/EGLN1/TANC2/EPHA4/PAK3/ZNF804A/WNT5A/PAFAH1B1/CAMK2B/RAPSN/NLGN3/BAIAP2/ZDHHC2/CHMP2B/FYN/DHX36/SHISA7/SSH1/ABHD17A/UBE3A
GO_STEM_CELL_DIFFERENTIATION	GO_STEM_CELL_DIFFERENTIATION	201	0.50521	1.45884	0.00966861	0.0699104	0.0550309	2221	tags=23%, list=15%, signal=20%	9464/26585/1906/100170841/5979/8854/10538/4780/8828/80326/1636/3976/4300/2624/8482/9839/6774/23603/4851/5610/5716/10512/7042/25/157506/10371/553115/3720/5008/9491/3516/83737/4070/861/5695/6886/5704/54910/5713/3815/23376/22823/54940/170506/5689/10016/59349	HAND2/GREM1/EDN1/EPOP/RET/ALDH1A2/BATF/NFE2L2/NRP2/WNT10A/ACE/LIF/MLLT3/GATA2/SEMA7A/ZEB2/STAT3/CORO1C/NOTCH1/EIF2AK2/PSMD10/SEMA3C/TGFB2/ABL1/RDH10/SEMA3A/PEF1/JARID2/OSM/PSMF1/RBPJ/ITCH/TACSTD2/NA/PSMB7/TAL1/PSMC4/SEMA4C/PSMD7/KIT/UFL1/MTF2/OCIAD1/DHX36/PSMB1/PDCD6/KLHL12
GO_AMEBOIDAL_TYPE_CELL_MIGRATION	GO_AMEBOIDAL_TYPE_CELL_MIGRATION	335	0.466438	1.38639	0.00968746	0.0699384	0.0550529	1996	tags=22%, list=13%, signal=20%	5743/9464/54453/26585/1906/7057/7124/3036/5979/6286/4780/8828/6385/6714/7422/84830/7076/27161/9404/5371/80149/2624/22846/5641/5872/5467/8482/117584/9839/3458/7046/23603/4851/84159/2768/10512/3964/7042/3688/2821/10769/659/25/575/5063/10371/4763/7040/5468/8394/7474/23332/9448/6776/116150/5048/7114/5586/5168/6239/23189/11235/2260/5747/285/6868/4070/4856/54910/5286/8879/5025/80005/7145	PTGS2/HAND2/RIN2/GREM1/EDN1/THBS1/TNF/HAS1/RET/S100P/NFE2L2/NRP2/SDC4/SRC/VEGFA/ADTRP/TIMP1/AGO2/LPXN/PML/ZC3H12A/GATA2/VASH1/LGMN/RAB13/PPARD/SEMA7A/RFFL/ZEB2/IFNG/TGFBR1/CORO1C/NOTCH1/ARID5B/GNA12/SEMA3C/LGALS8/TGFB2/ITGB1/GPI/PLK2/BMPR2/ABL1/ADGRB1/PAK3/SEMA3A/NF1/TGFB1/PPARG/PIP5K1A/WNT5A/CLASP1/MAP4K4/STAT5A/NUS1/PAFAH1B1/TMSB4X/PKN2/ENPP2/RREB1/KANK1/PDCD10/FGFR1/PTK2/ANGPT2/ADAM17/TACSTD2/…
GO_REGULATION_OF_CELL_SUBSTRATE_ADHESION	GO_REGULATION_OF_CELL_SUBSTRATE_ADHESION	171	0.518653	1.48003	0.0097027	0.0699403	0.0550545	1853	tags=20%, list=12%, signal=18%	4680/54453/26585/10562/7471/7057/1435/4323/1236/5328/6385/6714/5291/4814/7422/9748/5034/23603/4851/1398/3987/25/4763/4241/23332/9448/5795/6239/23189/81/5747/285/5295/4070/57091	CEACAM6/RIN2/GREM1/OLFM4/WNT1/THBS1/CSF1/MMP14/CCR7/PLAU/SDC4/SRC/PIK3CB/NINJ1/VEGFA/SLK/P4HB/CORO1C/NOTCH1/CRK/LIMS1/ABL1/NF1/MELTF/CLASP1/MAP4K4/PTPRJ/RREB1/KANK1/ACTN4/PTK2/ANGPT2/PIK3R1/TACSTD2/CASS4
GO_SUPEROXIDE_METABOLIC_PROCESS	GO_SUPEROXIDE_METABOLIC_PROCESS	55	0.645169	1.62507	0.0097246	0.0699902	0.0550937	1206	tags=20%, list=8%, signal=18%	10394/6648/1906/7124/4780/2643/2358/9644/285590/10516/7040	PRG3/SOD2/EDN1/TNF/NFE2L2/GCH1/FPR2/SH3PXD2A/SH3PXD2B/FBLN5/TGFB1
GO_POSITIVE_REGULATION_OF_METANEPHROS_DEVELOPMENT	GO_POSITIVE_REGULATION_OF_METANEPHROS_DEVELOPMENT	10	0.863433	1.6619	0.00978938	0.0702533	0.0553009	463	tags=40%, list=3%, signal=39%	7490/5979/10409/3976	WT1/RET/BASP1/LIF
GO_REGULATION_OF_ICOSANOID_SECRETION	GO_REGULATION_OF_ICOSANOID_SECRETION	14	0.825861	1.67691	0.0097987	0.0702533	0.0553009	150	tags=14%, list=1%, signal=14%	3553/1906	IL1B/EDN1
GO_CELL_ADHESION_MOLECULE_PRODUCTION	GO_CELL_ADHESION_MOLECULE_PRODUCTION	11	0.853811	1.66824	0.00980629	0.0702533	0.0553009	753	tags=36%, list=5%, signal=35%	3553/3576/10211/4851	IL1B/CXCL8/FLOT1/NOTCH1
GO_REGULATION_OF_HORMONE_SECRETION	GO_REGULATION_OF_HORMONE_SECRETION	185	0.511294	1.46751	0.0098618	0.0705428	0.0555288	2819	tags=28%, list=18%, signal=23%	3553/3589/1906/55638/654/338442/7124/8111/56729/6513/26251/3976/773/2182/5467/3458/2696/2029/9024/6845/5906/6616/3625/114897/6696/51762/5008/388581/2260/25874/4856/7036/6717/27230/353500/51083/23568/2867/7849/5781/301/3156/3382/84522/1946/4089/6720/10874/133308/415116/23178	IL1B/IL11/EDN1/SYBU/BMP6/HCAR2/TNF/GPR68/RETN/SLC2A1/KCNG2/LIF/CACNA1A/ACSL4/PPARD/IFNG/GIPR/ENSA/BRSK2/VAMP7/RAP1A/SNAP25/INHBB/C1QTNF1/SPP1/RAB8B/OSM/C1QTNF12/FGFR1/MPC2/CCN3/TFR2/SRI/SERP1/BMP8A/GAL/ARL2BP/FFAR2/PAX8/PTPN11/ANXA1/HMGCR/ICA1/JAGN1/EFNA5/SMAD4/SREBF1/NMU/SLC9B2/PIM3/PASK
GO_RESPONSE_TO_REACTIVE_OXYGEN_SPECIES	GO_RESPONSE_TO_REACTIVE_OXYGEN_SPECIES	200	0.505088	1.45782	0.00988385	0.0705925	0.0555678	2649	tags=28%, list=17%, signal=23%	6648/8013/1906/664/7124/1236/3586/4780/6714/8877/2643/6772/3939/7128/23135/558/8837/836/116988/54583/1398/10276/10105/54936/3840/25824/83667/25/10516/5798/5516/7186/5598/55512/3934/11235/84557/5599/4548/8737/2534/11179/847/8428/3039/538/7295/7337/5970/301/143686/140885/2395/2074/51765	SOD2/NR4A3/EDN1/BNIP3/TNF/CCR7/IL10/NFE2L2/SRC/SPHK1/GCH1/STAT1/LDHA/TNFAIP3/KDM6B/AXL/CFLAR/CASP3/AGAP3/EGLN1/CRK/NET1/PPIF/ADPRS/KPNA4/PRDX5/SESN2/ABL1/FBLN5/PTPRN/PPP2CB/TRAF2/MAPK7/SMPD3/LCN2/PDCD10/MAP1LC3A/MAPK8/MTR/RIPK1/FYN/ZNF277/CAT/STK24/HBA1/ATP7A/TXN/UBE3A/RELA/ANXA1/SESN3/SIRPA/FXN/ERCC6/STK26
GO_POSITIVE_REGULATION_OF_PROTEIN_CATABOLIC_PROCESS	GO_POSITIVE_REGULATION_OF_PROTEIN_CATABOLIC_PROCESS	199	0.50521	1.45776	0.0100522	0.0715256	0.0563024	1882	tags=21%, list=12%, signal=18%	3553/127544/7124/4780/7133/57761/440730/7128/255488/85409/79888/101/3458/5045/116224/2729/10444/5716/85407/9686/9554/10769/3949/160418/4734/83547/23327/324/5663/3300/7474/9870/7879/1452/112398/9695/5747/3416/83737/5704/9978	IL1B/RNF19B/TNF/NFE2L2/TNFRSF1B/TRIB3/TRIM67/TNFAIP3/RNF144B/NKD2/LPCAT1/ADAM8/IFNG/FURIN/FAM122A/GCLC/ZER1/PSMD10/NKD1/VGLL4/SEC22B/PLK2/LDLR/TMTC3/NEDD4/RILP/NEDD4L/APC/PSEN1/DNAJB2/WNT5A/AREL1/RAB7A/CSNK1A1/EGLN2/EDEM1/PTK2/IDE/ITCH/PSMC4/RBX1
GO_T_CELL_ACTIVATION_INVOLVED_IN_IMMUNE_RESPONSE	GO_T_CELL_ACTIVATION_INVOLVED_IN_IMMUNE_RESPONSE	81	0.595605	1.57674	0.0100553	0.0715256	0.0563024	2480	tags=36%, list=16%, signal=30%	51561/3383/114548/941/10538/84868/1880/80149/10892/3458/6774/64332/5971/54542/5663/5873/161882/246778/3958/602/3566/6095/3718/7292/538/3936/301/2150/5734	IL23A/ICAM1/NLRP3/CD80/BATF/HAVCR2/GPR183/ZC3H12A/MALT1/IFNG/STAT3/NFKBIZ/RELB/RC3H2/PSEN1/RAB27A/ZFPM1/IL27/LGALS3/BCL3/IL4R/RORA/JAK3/TNFSF4/ATP7A/LCP1/ANXA1/F2RL1/PTGER4
GO_RESPONSE_TO_EXTRACELLULAR_STIMULUS	GO_RESPONSE_TO_EXTRACELLULAR_STIMULUS	390	0.455936	1.36211	0.0100604	0.0715256	0.0563024	2571	tags=25%, list=17%, signal=21%	5743/6506/84251/3383/664/6752/8854/4780/595/6714/355/10135/6772/3939/6513/136/4914/8805/490/8942/558/80149/2182/22856/5467/79602/154743/57521/4925/7486/30849/6721/2729/5610/3428/2696/25994/2029/9024/3157/7706/4049/55626/83667/5447/7494/659/3949/3920/3625/2180/5468/27102/10670/249/53349/8520/5469/5571/6696/8658/58528/57817/1965/3934/51422/5315/54468/84557/7421/5599/26153/79718/27327/23710/29103/55…	PTGS2/SLC1A2/SGIP1/ICAM1/BNIP3/SSTR2/ALDH1A2/NFE2L2/CCND1/SRC/FAS/NAMPT/STAT1/LDHA/SLC2A1/ADORA2B/NTRK1/TRIM24/ATP2B1/KYNU/AXL/ZC3H12A/ACSL4/CHSY1/PPARD/ADIPOR2/BMT2/RPTOR/NUCB2/WRN/PIK3R4/SREBF2/GCLC/EIF2AK2/IFI16/GIPR/HIGD1A/ENSA/BRSK2/HMGCS1/TRIM25/LTA/AMBRA1/SESN2/POR/XBP1/BMPR2/LDLR/LAMP2/INHBB/ACSL1/PPARG/EIF2AK1/RRAGA/ALPL/ZFYVE1/HAT1/MED1/PRKAG1/SPP1/TNKS/RRAGD/HAMP/EIF2S1/LCN2/PRKAG2/PKM…
GO_REGULATION_OF_BLOOD_CIRCULATION	GO_REGULATION_OF_BLOOD_CIRCULATION	190	0.509117	1.4642	0.0100902	0.0716279	0.0563829	594	tags=12%, list=4%, signal=11%	5743/3269/491/6547/1906/9732/3383/5142/3759/151/1193/2643/1889/486/1636/26251/57731/490/80149/551/9446/5144	PTGS2/HRH1/ATP2B2/SLC8A3/EDN1/DOCK4/ICAM1/PDE4B/KCNJ2/ADRA2B/CLIC2/GCH1/ECE1/FXYD2/ACE/KCNG2/SPTBN4/ATP2B1/ZC3H12A/AVP/GSTO1/PDE4D
GO_REGULATION_OF_ODONTOGENESIS	GO_REGULATION_OF_ODONTOGENESIS	10	0.862418	1.65995	0.0101384	0.0718609	0.0565663	1366	tags=60%, list=9%, signal=55%	1906/1435/80326/650/80320/54880	EDN1/CSF1/WNT10A/BMP2/SP6/BCOR
GO_MATERNAL_PROCESS_INVOLVED_IN_FEMALE_PREGNANCY	GO_MATERNAL_PROCESS_INVOLVED_IN_FEMALE_PREGNANCY	51	0.653852	1.62905	0.0101761	0.0720188	0.0566906	2021	tags=27%, list=13%, signal=24%	2706/5743/84868/639/3976/5467/682/659/5469/6696/285/7421/23780/10959	GJB2/PTGS2/HAVCR2/PRDM1/LIF/PPARD/BSG/BMPR2/MED1/SPP1/ANGPT2/VDR/APOL2/TMED2
GO_RESPONSE_TO_DRUG	GO_RESPONSE_TO_DRUG	296	0.473548	1.39883	0.0103257	0.0729669	0.0574369	1308	tags=15%, list=9%, signal=14%	3553/5743/6506/1906/3383/7057/205/5142/7098/5979/8412/3586/4780/595/6714/5141/6772/3939/4864/4914/7050/7037/4860/836/6774/2768/6729/10512/3157/2235/7042/4049/10555/5447/6760/5906/7320/2180/4363/4773/5243/5468/5908/123	IL1B/PTGS2/SLC1A2/EDN1/ICAM1/THBS1/AK4/PDE4B/TLR3/RET/NA/IL10/NFE2L2/CCND1/SRC/PDE4A/STAT1/LDHA/NPC1/NTRK1/TGIF1/TFRC/PNP/CASP3/STAT3/GNA12/SRP54/SEMA3C/HMGCS1/FECH/TGFB2/LTA/AGPAT2/POR/SS18/RAP1A/UBE2B/ACSL1/ABCC1/NFATC2/ABCB1/PPARG/RAP1B/PLIN2
GO_SENSORY_SYSTEM_DEVELOPMENT	GO_SENSORY_SYSTEM_DEVELOPMENT	261	0.482513	1.41587	0.0104133	0.0734748	0.0578367	1337	tags=18%, list=9%, signal=16%	23657/718/2321/7490/356/654/5979/8854/8412/7111/25945/3985/6497/639/4814/7422/6498/200734/490/79888/9839/60436/7046/6774/23424/57045/56006/85407/6935/7042/7855/659/43/7431/157506/10371/285590/7289/4763/4853/22926/5584/28514/5663/7474/80714	SLC7A11/C3/FLT1/WT1/FASLG/BMP6/RET/ALDH1A2/NA/TMOD1/NECTIN3/LIMK2/SKI/PRDM1/NINJ1/VEGFA/SKIL/SPRED2/ATP2B1/LPCAT1/ZEB2/TGIF2/TGFBR1/STAT3/TDRD7/TWSG1/SMG9/NKD1/ZEB1/TGFB2/FZD5/BMPR2/ACHE/VIM/RDH10/SEMA3A/SH3PXD2B/TULP3/NF1/NOTCH2/ATF6/PRKCI/DLL1/PSEN1/WNT5A/PBX4
GO_REGULATION_OF_STRIATED_MUSCLE_CELL_DIFFERENTIATION	GO_REGULATION_OF_STRIATED_MUSCLE_CELL_DIFFERENTIATION	73	0.606995	1.58631	0.0104817	0.0737488	0.0580524	2104	tags=32%, list=14%, signal=27%	26585/4283/1906/4323/8740/10938/9150/10211/8837/4851/9794/650/7494/575/4773/7040/28514/57817/3516/4856/3566/9643/64855	GREM1/CXCL9/EDN1/MMP14/TNFSF14/EHD1/CTDP1/FLOT1/CFLAR/NOTCH1/MAML1/BMP2/XBP1/ADGRB1/NFATC2/TGFB1/DLL1/HAMP/RBPJ/CCN3/IL4R/MORF4L2/NIBAN2
GO_ANIMAL_ORGAN_REGENERATION	GO_ANIMAL_ORGAN_REGENERATION	60	0.632959	1.61403	0.0104837	0.0737488	0.0580524	1750	tags=25%, list=11%, signal=22%	8013/7471/3586/595/87178/558/4851/5906/5468/5469/7049/57817/23175/5315/285	NR4A3/WNT1/IL10/CCND1/PNPT1/AXL/NOTCH1/RAP1A/PPARG/MED1/TGFBR3/HAMP/LPIN1/PKM/ANGPT2
GO_NEGATIVE_REGULATION_OF_HEMOPOIESIS	GO_NEGATIVE_REGULATION_OF_HEMOPOIESIS	124	0.547639	1.51974	0.0105081	0.0738096	0.0581002	2423	tags=27%, list=16%, signal=23%	6348/8651/7098/441478/4780/8111/80149/2624/3659/4851/79577/7107/4792/140685/54542/4763/28514/3205/3902/161882/864/5295/861/6886/3566/3398/9646/25793/11006/3718/7292/4067/301	CCL3/SOCS1/TLR3/NRARP/NFE2L2/GPR68/ZC3H12A/GATA2/IRF1/NOTCH1/CDC73/GPR137B/NFKBIA/ZBTB46/RC3H2/NF1/DLL1/HOXA9/LAG3/ZFPM1/RUNX3/PIK3R1/NA/TAL1/IL4R/ID2/CTR9/FBXO7/LILRB4/JAK3/TNFSF4/LYN/ANXA1
GO_REGULATION_OF_BODY_FLUID_LEVELS	GO_REGULATION_OF_BODY_FLUID_LEVELS	381	0.456491	1.36282	0.0106281	0.0745078	0.0586499	1975	tags=18%, list=13%, signal=16%	5055/2152/7980/23657/1906/5329/7057/4780/7035/5328/595/10938/151/6714/5291/5359/3099/7422/84830/9060/5657/137964/8323/2769/558/2624/551/3659/54331/4645/2768/54843/310/4939/5868/308/50848/7494/2821/3998/1314/8546/23533/3937/11234/114897/80856/3783/5469/6776/6583/5873/1192/2151/161882/135/5154/5341/57493/5295/7421/50808/5624/6812/6814/2157/6521/5025/2782/23764	SERPINB2/F3/TFPI2/SLC7A11/EDN1/PLAUR/THBS1/NFE2L2/TFPI/PLAU/CCND1/EHD1/ADRA2B/SRC/PIK3CB/PLSCR1/HK2/VEGFA/ADTRP/PAPSS2/PRTN3/GPAT4/FZD6/GNA15/AXL/GATA2/AVP/IRF1/GNG2/MYO5B/GNA12/SYTL2/ANXA7/OAS2/RAB5A/ANXA5/F11R/XBP1/GPI/LMAN1/COPA/AP3B1/PIK3R5/LCP2/HPS5/C1QTNF1/LNPK/KCNN4/MED1/STAT5A/SLC22A4/RAB27A/CLIC1/F2RL2/ZFPM1/ADORA2A/PDGFA/PLEK/HEG1/PIK3R1/VDR/AK3/PROC/STXBP1/STXBP3/F8/SLC4A1/P2RX4/GNB1/M…
GO_REGULATION_OF_GLIAL_CELL_PROLIFERATION	GO_REGULATION_OF_GLIAL_CELL_PROLIFERATION	26	0.741149	1.6671	0.0106394	0.0745078	0.0586499	1269	tags=23%, list=8%, signal=21%	3553/7124/6497/4851/4049/5584	IL1B/TNF/SKI/NOTCH1/LTA/PRKCI
GO_IMPORT_INTO_CELL	GO_IMPORT_INTO_CELL	162	0.522463	1.48495	0.0106854	0.0747177	0.0588151	1451	tags=22%, list=9%, signal=20%	23657/6506/6547/8140/7057/64116/4599/3759/6515/4600/486/6550/6513/8645/6541/10211/3458/120103/11001/7251/4891/6518/6536/124935/8650/6509/3688/4923/6616/2180/5663/1317/610/84896/6583/6520	SLC7A11/SLC1A2/SLC8A3/SLC7A5/THBS1/SLC39A8/MX1/KCNJ2/SLC2A3/MX2/FXYD2/SLC9A3/SLC2A1/KCNK5/SLC7A1/FLOT1/IFNG/SLC36A4/SLC27A2/TSG101/SLC11A2/SLC2A5/SLC6A9/SLC43A2/NUMB/SLC1A4/ITGB1/NTSR1/SNAP25/ACSL1/PSEN1/SLC31A1/HCN2/ATAD1/SLC22A4/SLC3A2
GO_MUSCLE_STRUCTURE_DEVELOPMENT	GO_MUSCLE_STRUCTURE_DEVELOPMENT	479	0.442195	1.32896	0.0107383	0.0749755	0.059018	2115	tags=19%, list=14%, signal=17%	115701/9242/26585/2069/6648/4283/92737/3908/1906/7490/7471/7124/4323/10409/8740/9456/7111/10938/6497/51676/7422/9150/23135/1491/3976/53834/5467/10011/10211/8837/836/54583/7046/4851/84159/6830/2275/85407/9794/6935/650/7042/9686/9444/3688/7494/25/575/4763/4772/4773/7040/9043/6416/28514/7474/2006/27250/85461/5469/2010/10269/7049/57817/161882/6840/3720/9948/7140/9260/4607/2260/57493/2317/3516/2254/48…	ALPK2/MSC/GREM1/EREG/SOD2/CXCL9/DNER/LAMA2/EDN1/WT1/WNT1/TNF/MMP14/BASP1/TNFSF14/HOMER1/TMOD1/EHD1/SKI/ASB2/VEGFA/CTDP1/KDM6B/CTH/LIF/FGFRL1/PPARD/SRA1/FLOT1/CFLAR/CASP3/EGLN1/TGFBR1/NOTCH1/ARID5B/SUPT6H/FHL3/NKD1/MAML1/ZEB1/BMP2/TGFB2/VGLL4/QKI/ITGB1/XBP1/ABL1/ADGRB1/NF1/NFATC1/NFATC2/TGFB1/SPAG9/MAP2K4/DLL1/WNT5A/ELN/PDCD4/TANC1/MED1/EMD/ZMPSTE24/TGFBR3/HAMP/ZFPM1/SVIL/JARID2/WDR1/TNNT3/PDLIM7/…
GO_REGULATION_OF_MONOOXYGENASE_ACTIVITY	GO_REGULATION_OF_MONOOXYGENASE_ACTIVITY	47	0.661437	1.62909	0.010839	0.0755639	0.0594812	686	tags=13%, list=4%, signal=12%	3552/3553/4790/7124/2643/3458	IL1A/IL1B/NFKB1/TNF/GCH1/IFNG
GO_POSITIVE_REGULATION_OF_CD4_POSITIVE_ALPHA_BETA_T_CELL_DIFFERENTIATION	GO_POSITIVE_REGULATION_OF_CD4_POSITIVE_ALPHA_BETA_T_CELL_DIFFERENTIATION	26	0.740089	1.66472	0.0108655	0.0755639	0.0594812	783	tags=27%, list=5%, signal=26%	51561/114548/941/8651/10892/3458/64332	IL23A/NLRP3/CD80/SOCS1/MALT1/IFNG/NFKBIZ
GO_ORGAN_OR_TISSUE_SPECIFIC_IMMUNE_RESPONSE	GO_ORGAN_OR_TISSUE_SPECIFIC_IMMUNE_RESPONSE	19	0.782603	1.67389	0.0108711	0.0755639	0.0594812	651	tags=21%, list=4%, signal=20%	6037/820/56957/6036	RNASE3/CAMP/OTUD7B/RNASE2
GO_LYMPHOCYTE_APOPTOTIC_PROCESS	GO_LYMPHOCYTE_APOPTOTIC_PROCESS	65	0.620933	1.59912	0.0109124	0.0757381	0.0596183	656	tags=12%, list=4%, signal=12%	3559/29126/384/356/3586/355/10758/101	IL2RA/CD274/ARG2/FASLG/IL10/FAS/TRAF3IP2/ADAM8
GO_CILIUM_ORGANIZATION	GO_CILIUM_ORGANIZATION	341	-0.304727	-1.24896	0.0109478	0.0758709	0.0597228	2474	tags=26%, list=16%, signal=22%	10677/10807/140735/403/3911/22981/23386/118491/22832/80321/55172/11064/138639/80776/85478/4867/51314/84902/29105/23224/79874/23639/117177/221322/85302/25981/84071/79659/79969/79582/25937/1639/79600/8555/4134/8814/79864/8481/28981/54919/80199/56683/54558/84260/5566/23157/22994/353116/11190/23322/57560/219844/51364/95681/10801/27241/57545/26160/11020/10013/283232/55582/8558/27185/51057/55559/4957/7…	AVIL/ENTR1/DYNLL2/ARL3/LAMA5/NINL/NUDCD3/CFAP70/CEP162/CEP70/DNAAF2/CNTRL/PTPDC1/B9D2/CCDC65/NPHP1/NME8/CEP89/CFAP20/SYNE2/RABEP2/LRRC6/RAB3IP/TBC1D32/FBF1/DNAH1/ARMC2/DYNC2H1/ATAT1/SPAG16/WWTR1/DCTN1/TCTN1/CDC14B/MAP4/CDKL1/JHY/OFD1/IFT81/DNAAF5/FUZ/CFAP298/SPATA6/TCHP/PRKACA/SEPTIN6/CEP131/RILPL1/CEP250/RPGRIP1L/IFT80/HYLS1/ZMYND10/CEP41/SEPTIN9/BBS9/CC2D2A/IFT172/IFT27/HDAC6/TMEM80/KIF27/CDK10…
GO_POSITIVE_REGULATION_OF_ENDOTHELIAL_CELL_APOPTOTIC_PROCESS	GO_POSITIVE_REGULATION_OF_ENDOTHELIAL_CELL_APOPTOTIC_PROCESS	18	0.789619	1.67377	0.0110092	0.0761835	0.0599689	1338	tags=28%, list=9%, signal=25%	6347/356/7057/5584/27250	CCL2/FASLG/THBS1/PRKCI/PDCD4
GO_INTERLEUKIN_10_PRODUCTION	GO_INTERLEUKIN_10_PRODUCTION	48	0.658227	1.62517	0.0110349	0.0762486	0.0600202	1466	tags=17%, list=10%, signal=15%	8288/29126/9636/51561/6774/53833/28514/9308	EPX/CD274/ISG15/IL23A/STAT3/IL20RB/DLL1/CD83
GO_OLIGODENDROCYTE_DEVELOPMENT	GO_OLIGODENDROCYTE_DEVELOPMENT	36	0.694617	1.64338	0.0111402	0.0767625	0.0604247	351	tags=8%, list=2%, signal=8%	84504/56978/9334	NKX6-2/PRDM8/B4GALT5
GO_CELL_DIFFERENTIATION_IN_SPINAL_CORD	GO_CELL_DIFFERENTIATION_IN_SPINAL_CORD	29	0.722664	1.65411	0.0111545	0.0767625	0.0604247	753	tags=14%, list=5%, signal=13%	84504/7471/2624/4851	NKX6-2/WNT1/GATA2/NOTCH1
GO_INFLAMMATORY_CELL_APOPTOTIC_PROCESS	GO_INFLAMMATORY_CELL_APOPTOTIC_PROCESS	20	0.774561	1.67077	0.0111605	0.0767625	0.0604247	430	tags=30%, list=3%, signal=29%	23657/356/1514/338442/5291/3665	SLC7A11/FASLG/CTSL/HCAR2/PIK3CB/IRF7
GO_POSITIVE_REGULATION_OF_MUSCLE_CONTRACTION	GO_POSITIVE_REGULATION_OF_MUSCLE_CONTRACTION	33	0.705343	1.6484	0.0111819	0.0767625	0.0604247	589	tags=15%, list=4%, signal=15%	5743/1906/151/8877/9446	PTGS2/EDN1/ADRA2B/SPHK1/GSTO1
GO_RECEPTOR_BIOSYNTHETIC_PROCESS	GO_RECEPTOR_BIOSYNTHETIC_PROCESS	23	0.754861	1.66704	0.0111915	0.0767625	0.0604247	1253	tags=39%, list=8%, signal=36%	1906/7124/3586/10802/3685/3458/5045/43/5468	EDN1/TNF/IL10/SEC24A/ITGAV/IFNG/FURIN/ACHE/PPARG
GO_BROWN_FAT_CELL_DIFFERENTIATION	GO_BROWN_FAT_CELL_DIFFERENTIATION	39	0.684213	1.6391	0.0112159	0.0767919	0.0604478	673	tags=15%, list=4%, signal=15%	5743/3914/664/284207/30001/116844	PTGS2/LAMB3/BNIP3/METRNL/ERO1A/LRG1
GO_RESPONSE_TO_PH	GO_RESPONSE_TO_PH	29	0.722406	1.65352	0.0112286	0.0767919	0.0604478	867	tags=17%, list=6%, signal=16%	2853/6714/8111/5641/760	GPR31/SRC/GPR68/LGMN/CA2
GO_POSITIVE_REGULATION_OF_T_CELL_MIGRATION	GO_POSITIVE_REGULATION_OF_T_CELL_MIGRATION	26	0.738665	1.66152	0.0112573	0.0768121	0.0604637	1321	tags=27%, list=9%, signal=25%	6364/8740/9943/101/58515/7474/8772	CCL20/TNFSF14/OXSR1/ADAM8/SELENOK/WNT5A/FADD
GO_CALCIUM_MEDIATED_SIGNALING_USING_INTRACELLULAR_CALCIUM_SOURCE	GO_CALCIUM_MEDIATED_SIGNALING_USING_INTRACELLULAR_CALCIUM_SOURCE	18	0.788685	1.67179	0.0112645	0.0768121	0.0604637	2	tags=6%, list=0%, signal=6%	6364	CCL20
GO_LENS_FIBER_CELL_DIFFERENTIATION	GO_LENS_FIBER_CELL_DIFFERENTIATION	27	0.733434	1.66034	0.0112817	0.0768174	0.0604679	1144	tags=26%, list=7%, signal=24%	23657/7111/6498/200734/9839/23424/7431	SLC7A11/TMOD1/SKIL/SPRED2/ZEB2/TDRD7/VIM
GO_POSITIVE_REGULATION_OF_CYTOSOLIC_CALCIUM_ION_CONCENTRATION_INVOLVED_IN_PHOSPHOLIPASE_C_ACTIVATING_G_PROTEIN_COUPLED_SIGNALING_PATHWAY	GO_POSITIVE_REGULATION_OF_CYTOSOLIC_CALCIUM_ION_CONCENTRATION_INVOLVED_IN_PHOSPHOLIPASE_C_ACTIVATING_G_PROTEIN_COUPLED_SIGNALING_PATHWAY	23	0.754593	1.66644	0.011345	0.0771359	0.0607186	1664	tags=30%, list=11%, signal=27%	23566/80045/1906/2769/719/2151/286530	LPAR3/GPR157/EDN1/GNA15/C3AR1/F2RL2/P2RY8
GO_PEPTIDYL_TYROSINE_MODIFICATION	GO_PEPTIDYL_TYROSINE_MODIFICATION	298	0.470792	1.39117	0.0113971	0.0773778	0.060909	1853	tags=18%, list=12%, signal=16%	3589/26585/2069/9052/51561/2321/654/3383/941/8651/7124/5979/64092/6714/57732/960/7422/8784/1636/3976/4914/558/27/83666/3458/7525/6774/7251/5770/2043/5610/30844/9021/25/7040/6416/5663/1464/3702/6503/5795/80851/9467/5168/56034/5008/5154/2260/5747/6868/6886/54625/57091	IL11/GREM1/EREG/GPRC5A/IL23A/FLT1/BMP6/ICAM1/CD80/SOCS1/TNF/RET/NA/SRC/ZFYVE28/CD44/VEGFA/TNFRSF18/ACE/LIF/NTRK1/AXL/ABL2/PARP9/IFNG/YES1/STAT3/TSG101/PTPN1/EPHA4/EIF2AK2/EHD4/SOCS3/ABL1/TGFB1/MAP2K4/PSEN1/CSPG4/ITK/SLA/PTPRJ/SH3BP5L/SH3BP5/ENPP2/PDGFC/OSM/PDGFA/FGFR1/PTK2/ADAM17/TAL1/PARP14/CASS4
GO_REGULATION_OF_SYNAPTIC_TRANSMISSION_GLUTAMATERGIC	GO_REGULATION_OF_SYNAPTIC_TRANSMISSION_GLUTAMATERGIC	43	0.67119	1.63157	0.0115852	0.0785406	0.0618243	1817	tags=30%, list=12%, signal=27%	5743/6347/7124/9456/4914/127262/5663/84896/135/8564/22930/6812/54413	PTGS2/CCL2/TNF/HOMER1/NTRK1/TPRG1L/PSEN1/ATAD1/ADORA2A/KMO/RAB3GAP1/STXBP1/NLGN3
GO_NEGATIVE_REGULATION_OF_RESPONSE_TO_BIOTIC_STIMULUS	GO_NEGATIVE_REGULATION_OF_RESPONSE_TO_BIOTIC_STIMULUS	83	0.587854	1.56054	0.0116027	0.0785451	0.0618279	1826	tags=19%, list=12%, signal=17%	3559/384/5272/84868/79132/7128/10906/9111/1398/3428/103/5468/3105/64771/83737/54625	IL2RA/ARG2/SERPINB9/HAVCR2/DHX58/TNFAIP3/TRAFD1/NMI/CRK/IFI16/ADAR/PPARG/HLA-A/ILRUN/ITCH/PARP14
GO_ADULT_BEHAVIOR	GO_ADULT_BEHAVIOR	91	0.577727	1.55139	0.0116665	0.0787562	0.061994	2325	tags=27%, list=15%, signal=23%	23657/6506/8013/9456/7111/4864/124925/57731/1267/6712/2043/372/1476/4923/8772/5048/10269/26058/54413/3398/114781/9455/4204/351/4929	SLC7A11/SLC1A2/NR4A3/HOMER1/TMOD1/NPC1/SEZ6/SPTBN4/CNP/SPTBN2/EPHA4/ARCN1/CSTB/NTSR1/FADD/PAFAH1B1/ZMPSTE24/GIGYF2/NLGN3/ID2/BTBD9/HOMER2/MECP2/APP/NR4A2
GO_RENAL_VESICLE_DEVELOPMENT	GO_RENAL_VESICLE_DEVELOPMENT	11	0.847712	1.65632	0.0116676	0.0787562	0.061994	463	tags=27%, list=3%, signal=26%	26585/6772/3976	GREM1/STAT1/LIF
GO_EPITHELIAL_CELL_DEVELOPMENT	GO_EPITHELIAL_CELL_DEVELOPMENT	172	0.513153	1.46513	0.0117015	0.0787659	0.0620016	1802	tags=21%, list=12%, signal=19%	3553/3642/654/3383/7124/7111/6714/639/7422/137964/4914/5144/5872/25861/196383/4851/2889/50848/7494/5906/286451/26051/7431/22862/9693/4853/5908/28514/7474/5048/80173/25932/2260/57493/2317/5624	IL1B/INSM1/BMP6/ICAM1/TNF/TMOD1/SRC/PRDM1/VEGFA/GPAT4/NTRK1/PDE4D/RAB13/WHRN/RILPL2/NOTCH1/RAPGEF1/F11R/XBP1/RAP1A/YIPF6/PPP1R16B/VIM/FNDC3A/RAPGEF2/NOTCH2/RAP1B/DLL1/WNT5A/PAFAH1B1/IFT74/CLIC4/FGFR1/HEG1/FLNB/PROC
GO_REGULATION_OF_OXIDOREDUCTASE_ACTIVITY	GO_REGULATION_OF_OXIDOREDUCTASE_ACTIVITY	86	0.583688	1.55727	0.0117027	0.0787659	0.0620016	1100	tags=13%, list=7%, signal=12%	3552/3553/1906/4790/7124/2643/27/3458/5163/5447/25	IL1A/IL1B/EDN1/NFKB1/TNF/GCH1/ABL2/IFNG/PDK1/POR/ABL1
GO_PATHWAY_RESTRICTED_SMAD_PROTEIN_PHOSPHORYLATION	GO_PATHWAY_RESTRICTED_SMAD_PROTEIN_PHOSPHORYLATION	45	0.664103	1.62545	0.011798	0.0792388	0.0623739	1528	tags=29%, list=10%, signal=26%	26585/56937/654/6386/7046/57045/650/7042/659/3625/7040/92/7049	GREM1/PMEPA1/BMP6/SDCBP/TGFBR1/TWSG1/BMP2/TGFB2/BMPR2/INHBB/TGFB1/ACVR2A/TGFBR3
GO_OVARIAN_FOLLICLE_DEVELOPMENT	GO_OVARIAN_FOLLICLE_DEVELOPMENT	43	0.670354	1.62953	0.0118069	0.0792388	0.0623739	1173	tags=23%, list=8%, signal=22%	2069/4327/3383/4323/6714/7422/5806/8372/3955/3625	EREG/MMP19/ICAM1/MMP14/SRC/VEGFA/PTX3/HYAL3/LFNG/INHBB
GO_COMPLEMENT_ACTIVATION	GO_COMPLEMENT_ACTIVATION	43	0.670204	1.62917	0.0118346	0.0793108	0.0624306	610	tags=9%, list=4%, signal=9%	3553/629/718/1604	IL1B/CFB/C3/CD55
GO_REGULATION_OF_MYOBLAST_FUSION	GO_REGULATION_OF_MYOBLAST_FUSION	15	0.810707	1.66585	0.01187	0.0793231	0.0624403	1203	tags=47%, list=8%, signal=43%	4283/8740/10938/10211/8837/575/4773	CXCL9/TNFSF14/EHD1/FLOT1/CFLAR/ADGRB1/NFATC2
GO_MONOCARBOXYLIC_ACID_TRANSPORT	GO_MONOCARBOXYLIC_ACID_TRANSPORT	120	0.54812	1.51588	0.0118704	0.0793231	0.0624403	1402	tags=19%, list=9%, signal=18%	3553/366/1906/7057/151176/9123/6513/1636/80765/140679/2182/5467/11001/10809/6535/4923/2180/4763/5468/8273/123/9120/28232	IL1B/AQP9/EDN1/THBS1/ERFE/SLC16A3/SLC2A1/ACE/STARD5/SLC32A1/ACSL4/PPARD/SLC27A2/STARD10/SLC6A8/NTSR1/ACSL1/NF1/PPARG/SLC10A3/PLIN2/SLC16A6/SLCO3A1
GO_CHROMATIN_REMODELING	GO_CHROMATIN_REMODELING	187	-0.350691	-1.35344	0.0118994	0.0794031	0.0625032	3613	tags=30%, list=24%, signal=24%	2099/9219/8607/64105/8365/23421/473/4678/10155/6595/5928/1788/6602/1616/5757/55929/79019/80312/6598/3065/5925/83989/84954/23272/3066/3054/1107/9759/11164/201254/1029/57492/60/2491/55729/6597/10629/55011/6604/22880/546/6603/121504/55320/53615/22955/23081/54737/10014/6601/283899/80152/79829/2648/79913/80336/23314	ESR1/MTA2/RUVBL1/CENPK/H4C8/ITGB3BP/RERE/NASP/TRIM28/SMARCA2/RBBP4/DNMT3A/SMARCD1/DAXX/PTMA/DMAP1/CENPM/TET1/SMARCB1/HDAC1/RB1/FAM172A/MPND/TASOR/HDAC2/HCFC1/CHD3/HDAC4/NUDT5/CENPX/CDKN2A/ARID1B/ACTB/CENPI/ATF7IP/SMARCA4/TAF6L/PIH1D1/SMARCD3/MORC2/ATRX/SMARCD2/H4-16/MIS18BP1/MBD3/SCMH1/KDM4C/MPHOSPH8/HDAC5/SMARCC2/INO80E/CENPT/NAA40/KAT2A/ACTR5/PABPC1L/SATB2
GO_AXONEMAL_DYNEIN_COMPLEX_ASSEMBLY	GO_AXONEMAL_DYNEIN_COMPLEX_ASSEMBLY	20	0.771365	1.66388	0.0119924	0.0798136	0.0628264	372	tags=15%, list=2%, signal=15%	8632/123872/83538	DNAH17/DNAAF1/TTC25
GO_REGULATION_OF_MUSCLE_CELL_DIFFERENTIATION	GO_REGULATION_OF_MUSCLE_CELL_DIFFERENTIATION	121	0.546453	1.51272	0.0119951	0.0798136	0.0628264	2104	tags=29%, list=14%, signal=25%	26585/2069/6648/4283/1906/4323/8740/10938/9150/1491/10211/8837/4851/6830/9794/6935/650/7494/25/575/4772/4773/7040/9043/28514/27250/57817/3516/2254/4856/3566/3398/9643/3815/64855	GREM1/EREG/SOD2/CXCL9/EDN1/MMP14/TNFSF14/EHD1/CTDP1/CTH/FLOT1/CFLAR/NOTCH1/SUPT6H/MAML1/ZEB1/BMP2/XBP1/ABL1/ADGRB1/NFATC1/NFATC2/TGFB1/SPAG9/DLL1/PDCD4/HAMP/RBPJ/FGF9/CCN3/IL4R/ID2/MORF4L2/KIT/NIBAN2
GO_REGULATION_OF_ENDOTHELIAL_CELL_DIFFERENTIATION	GO_REGULATION_OF_ENDOTHELIAL_CELL_DIFFERENTIATION	29	0.720286	1.64867	0.0120444	0.0800278	0.062995	1008	tags=24%, list=7%, signal=23%	3553/654/7124/7422/4851/6935/50848	IL1B/BMP6/TNF/VEGFA/NOTCH1/ZEB1/F11R
[truncated: 3,968 more rows]
